# Supplementary material for: Proteomic Investigation Uncovers Potential Targets and Target Sites of Pneumococcal Serine-Threonine Kinase StkP and Phosphatase PhpP
Source: Front Microbiol. 2020 Feb 4;10:3101. doi: 10.3389/fmicb.2019.03101 (PMC7011611; doi:10.3389/fmicb.2019.03101)
Supplement: Supplementary file 2 [file Data_Sheet_2.xlsx]

## Sheet: Data Sheet S2_Information
Data Sheet S2: LFQ analysis
Supplementary File S1: Global_LFQ_results
	Detailed overview of the label-free quantification data
	All significantly regulated proteins were sorted according to specific functional main roles.
		All in all annotated proteins
		All identified proteins
		ΔphpP/WT * +	significantly higher abundant proteins	(q -value ≤ 0.01) (Fold Change, FC ≥ 2_x0002_)
		ΔphpP/WT On	"On" proteins	Proteins exclusively identified with at least two unique peptides in all three biological replicates of the ΔphpP strain but in none of the replicates of the WT strain are "On" proteins.
		ΔphpP/WT* -	significantly lower abundant proteins	(q-value ≤ 0.01) (FC ≤ 2_x0002_)
		ΔphpP/WT Off	"Off" proteins	Proteins exclusively identified with at least two unique peptides in all three biological replicates of the WT strain but in none of the replicates of the ΔphpP strain are "Off" proteins.
		higher	sum of higher abundant proteins including "On" proteins
		lower	sum of lower abundant proteins including "Off" proteins
		All regulated	sum of significantly regulated proteins
		ΔphpP/WT [%] /identified proteins	percentage of significantly regulated proteins
		ΔstkP/WT * +	significantly higher abundant proteins	(q-value ≤ 0.01) (FC ≥ 2_x0002_)
		ΔstkP/WT On	"On" proteins	Proteins exclusively identified with at least two unique peptides in all three biological replicates of the ΔstkP strain but in none of the replicates of the WT strain are "On" proteins.
		ΔstkP/WT* -	significantly lower abundant proteins	(q-value ≤ 0.01) (FC ≤ 2_x0002_)
		ΔstkP/WT Off	"Off" proteins	Proteins exclusively identified with at least two unique peptides in all three biological replicates of the WT strain but in none of the replicates of the ΔstkP strain are "Off" proteins.
		higher	sum of higher abundant proteins including "On" proteins
		lower	sum of lower abundant proteins including "Off" proteins
		All regulated	sum of significantly regulated proteins
		ΔstkP/WT [%] /identified proteins	percentage of significantly regulated proteins
Supplementary File S2: LFQ_intensities_all_strains
	MaxQuant’s LFQ intensities (Cox et al., 2014) for all biological replicates of each strain.
	Proteins were considered for quantification if an LFQ value was present in all three biological replicates of each strain.
Supplementary File S3: Median_normalization
Supplementary File S4: LFQ_intensities_normalized
	Data were normalized by median in Microsoft Excel.
Supplementary File S5: Input_SAM_WT_dphpP
Supplementary File S6: Fold changes_WT_dphpP
Supplementary File S7: Input_SAM_WT_dstkP
Supplementary File S8: Fold changes_WT_dstkP
	Statistical evaluation of quantified proteins was performed using RStudio (version 3.5.0) and the SAM (Significance analysis of microarrays; Tusher et al., 2001)
	script by Michael Seo with the implemented two-class unpaired test, which is analogous to a t-test between subjects.
	Differentially expressed proteins with a minimum fold change of two and a q-value ≤ 0.01 were considered as significantly regulated.

## Sheet: S1_Global_LFQ_results
Main functional role	All in all annotated proteins	All identified proteins	ΔphpP/WT * +	ΔphpP/WT On	ΔphpP/WT* -	ΔphpP/WT Off	higher	lower	All regulated	ΔphpP/WT [%] /identified proteins	ΔstkP/WT * +	ΔstkP/WT On	ΔstkP/WT* -	ΔstkP/WT Off	higher	lower	All regulated	ΔstkP/WT [%] /identified proteins
Amino acid metabolism	80	72	8	2	-14	-2	10	16	26	0.361111	13	0	-14	-1	13	15	28	0.388889
Biosynthesis of other secondary metabolites	3	3	1	0	0	0	1	0	1	0.333333	1	0	0	0	1	0	1	0.333333
Carbohydrate metabolism	131	96	14	2	-8	-3	16	11	27	0.28125	16	0	-4	-2	16	6	22	0.229167
Cellular processes	77	46	4	1	-6	-1	5	7	12	0.26087	3	0	-4	-1	3	5	8	0.173913
Competence	1	0	0	0	0	0	0	0	0	-	0	0	0	0	0	0	0	-
DNA metabolism	88	74	10	1	-9	-3	11	12	23	0.310811	3	1	-6	-4	4	10	14	0.189189
Energy metabolism	24	21	1	0	-5	-1	1	6	7	0.333333	4	0	-2	-1	4	3	7	0.333333
Glycan biosynthesis and metabolism	56	48	8	0	-6	-1	8	7	15	0.3125	8	1	-4	0	9	4	13	0.270833
Lipid metabolism	27	22	3	1	-2	0	4	2	6	0.272727	1	0	-5	0	1	5	6	0.272727
Metabolism of cofactors and vitamins	52	43	7	2	-11	-3	9	14	23	0.534884	2	0	-6	-2	2	8	10	0.232558
Metabolism of other amino acids	7	7	0	0	-1	0	0	1	1	0.142857	0	0	-1	0	0	1	1	0.142857
Metabolism of terpenoids and polyketides	14	9	3	1	0	0	4	0	4	0.444444	0	1	0	0	1	0	1	0.111111
Nucleotide metabolism	54	52	11	1	-7	-3	12	10	22	0.423077	2	0	-8	0	2	8	10	0.192308
Protein fate	74	65	12	1	-2	-4	13	6	19	0.292308	8	0	-4	-3	8	7	15	0.230769
Protein synthesis	154	143	13	1	-22	-4	14	26	40	0.27972	19	1	-12	-2	20	14	34	0.237762
Regulatory functions	17	13	1	0	-2	-1	1	3	4	0.307692	1	0	-4	-1	1	5	6	0.461538
Signal transduction	31	22	2	0	-3	-4	2	7	9	0.409091	0	0	-5	-4	0	9	9	0.409091
Transcription	90	69	2	5	-15	-3	7	18	25	0.362319	9	0	-11	-3	9	14	23	0.333333
Transport and binding proteins	266	145	18	13	-13	-9	31	22	53	0.365517	13	1	-15	-9	14	24	38	0.262069
Unknown function	670	292	38	15	-25	-7	53	32	85	0.291096	26	3	-27	-14	29	41	70	0.239726
Xenobiotics biodegradation and metabolism	3	3	0	0	-1	0	0	1	1	0.333333	0	0	0	0	0	0	0	0
		Sum	156	46	-152	-49					129	8	-132	-47
Regulation				Amino acid metabolism			Carbohydrate metabolism			Cellular processes			DNA metabolism			Energy metabolism			Glycan biosynthesis and metabolism			Lipid metabolism			Metabolism of cofactors and vitamins			Nucleotide metabolism			Protein fate			Protein synthesis			Regulatory functions			Signal transduction			Transcription			Transport and binding proteins			Others
up	0	0	8	13		14	16		4	3		10	3		1	4		8	8		3	1		7	2		11	2		12	8		13	19		1	1		2	0		2	9		18	13		4	1
on	0	0	2	0		2	0		1	0		1	1		0	0		0	1		1	0		2	0		1	0		1	0		1	1		0	0		0	0		5	0		13	1		1	1
down	0	0	-14	-14		-8	-4		-6	-4		-9	-6		-5	-2		-6	-4		-2	-5		-11	-6		-7	-8		-2	-4		-22	-12		-2	-4		-3	-5		-15	-11		-13	-15		-1	-1
off	0	0	-2	-1		-3	-2		-1	-1		-3	-4		-1	-1		-1	0		0	0		-3	-2		-3	0		-4	-3		-4	-2		-1	-1		-4	-4		-3	-3		-9	-9		0	0
			ΔphpP/WT	ΔstkP/WT		ΔphpP/WT	ΔstkP/WT		ΔphpP/WT	ΔstkP/WT		ΔphpP/WT	ΔstkP/WT		ΔphpP/WT	ΔstkP/WT		ΔphpP/WT	ΔstkP/WT		ΔphpP/WT	ΔstkP/WT		ΔphpP/WT	ΔstkP/WT		ΔphpP/WT	ΔstkP/WT		ΔphpP/WT	ΔstkP/WT		ΔphpP/WT	ΔstkP/WT		ΔphpP/WT	ΔstkP/WT		ΔphpP/WT	ΔstkP/WT		ΔphpP/WT	ΔstkP/WT		ΔphpP/WT	ΔstkP/WT		ΔphpP/WT	ΔstkP/WT

## Sheet: S2_LFQ_intensities_all_strains
Identifier	LFQ intensity WT_BR1	LFQ intensity WT_BR2	LFQ intensity WT_BR3		Median	LFQ intensity ΔphpP_BR1	LFQ intensity ΔphpP_BR2	LFQ intensity ΔphpP_BR3		Median	LFQ intensity ΔstkP_BR1	LFQ intensity ΔstkP_BR2	LFQ intensity ΔstkP_BR3		Median
gi|116075886	143100000	150400000	121650000	LFQ intensity WT_BR1	20224500	302329984	282670016	245120000	LFQ intensity ΔphpP_BR1	34271000	130110000	118440000	59015000	LFQ intensity ΔstkP_BR1	17001000
gi|116075887	4261700	4018000	3316100	LFQ intensity WT_BR2	19757000	15189000	17397000	13624000	LFQ intensity ΔphpP_BR2	30405000	5594000	6806600	6681500	LFQ intensity ΔstkP_BR2	19360000
gi|116075888	59201000	58642000	69029000	LFQ intensity WT_BR3	20124500	60767000	55426000	67304000	LFQ intensity ΔphpP_BR3	29437000	60459000	77806000	80663000	LFQ intensity ΔstkP_BR3	20582000
gi|116075889	1286400	1205200	1539500			-	-	-			-	-	-
gi|116075890	0	732090	0			24587000	9506900	16155000			0	0	596770
gi|116075891	113410000	116320000	122700000			273060000	333470016	420529984			365910016	240370000	242360000
gi|116075892	49314000	173440000	151560000			225360000	181600000	309230016			-	-	-
gi|116075894	9358200	7996300	10447000			17496000	14840000	9296400			0	0	339920
gi|116075895	1653200	1061300	1372000			-	-	-			1426700	1320400	2624500
gi|116075897	44804000	54822000	47662000			71866000	77359000	86013000			57862000	94629000	32296000
gi|116075902	248950	0	288110			1442000	1383700	1142000			0	291200	324410
gi|116075903	105600	120600	91997			336460	221380	453420			0	0	77421
gi|116075904	16946000	22273000	17556000			15124000	19630000	10620000			6231400	4304200	4630400
gi|116075906	53580000	52812000	32485000			48042000	46523000	43361000			19459000	10551000	20101000
gi|116075907	47534000	28588000	20533000			46819000	41320000	39170000			45278000	74814000	45902000
gi|116075908	6657800	9081100	7452200			7498400	7449900	7848800			10002000	11710000	9368500
gi|116075910	8440100	7885100	6193300			10020000	10475000	8596100			8146500	10347000	9699100
gi|116075911	356150016	152250000	267320000			33662000	34138000	21484000			40347000	63017000	87882000
gi|116075912	0	0	1101200			-	-	-			-	-	-
gi|116075913	4592100	3134300	3577200			6933800	6393000	6303000			3406000	4529700	1822000
gi|116075914	100130000	77575000	77916000			70192000	57715000	50097000			59520000	53459000	57386000
gi|116075915	23707000	24979000	22560000			35995000	25071000	29437000			81198000	76365000	63620000
gi|116075917	10828000	14802000	15391000			6060100	7446400	8712500			26498000	28634000	27920000
gi|116075921	70247000	42291000	30949000			112570000	88574000	76926000			228550000	192670000	77486000
gi|116075922	34903000	35684000	31577000			82290000	71287000	76827000			16531000	15632000	13141000
gi|116075923	5167300	6165700	5348500			7640300	6047800	6487000			9611100	9458600	15152000
gi|116075926	2504500	1724100	1939400			6560000	4349300	3679500			20624000	40250000	0
gi|116075927	0	0	3262500			887930	0	763930			-	-	-
gi|116075929	6826700	6035500	5890700			13789000	9332800	9536100			0	3253900	4144800
gi|116075931	2783600128	2144600064	2303500032			3780000000	3640699904	3132999936			3111000064	3182200064	2537900032
gi|116075932	20244000768	17465999360	17220999168			16620000256	15160999936	20370999296			13941000192	15009000448	15162999808
gi|116075934	565100032	725059968	628990016			2705999872	5218800128	4414499840			1057900032	628849984	1299100032
gi|116075936	77030000	74845000	86337000			92350000	86112000	63559000			81068000	82183000	98344000
gi|116075937	0	14850	0			0	365820	256570			-	-	-
gi|116075938	87924000	94055000	76859000			118270000	144660000	189850000			142270000	172430000	142010000
gi|116075940	80300000	68735000	65084000			362340000	266630000	214840000			88784000	76188000	93078000
gi|116075941	5298400	5553200	6756700			32354000	19438000	24862000			20468000	13101000	12732000
gi|116075942	3645900032	3199000064	4538999808			4400699904	4214299904	5271900160			5996899840	7186899968	7198000128
gi|116075944	170570000	140630000	175930000			157190000	213320000	205720000			177540000	233890000	235400000
gi|116075945	17273000	25797000	20017000			78522000	73349000	58169000			26184000	44024000	21208000
gi|116075946	28489000	35691000	38102000			76229000	140450000	76830000			28851000	44412000	32196000
gi|116075947	0	0	6149000			0	0	2104100			-	-	-
gi|116075949	1022900	718890	1447200			890610	883020	793150			0	324290	334780
gi|116075951	5558800	4342100	5624900			3460300	6119600	3999900			0	870800	1351500
gi|116075952	495190016	605580032	400409984			502720000	441500000	440780000			341430016	244320000	169240000
gi|116075954	0	867820	0			2082800	2084000	0			2384900	2790300	0
gi|116075955	9170200	11270000	12046000			5209200	5444100	6366400			8839300	10635000	10483000
gi|116075958	1352800000	1348899968	1315500032			1619900032	2055200000	1588099968			1139900032	942870016	1393100032
gi|116075959	31194000	37940000	38148000			116040000	110220000	127070000			50978000	50711000	60693000
gi|116075960	60203000	50587000	60005000			100490000	94638000	224230000			46466000	55529000	40658000
gi|116075961	2189700096	1730200064	1754099968			1544600064	1888899968	1453200000			3491099904	3294200064	3394099968
gi|116075962	0	259180	0			-	-	-			-	-	-
gi|116075963	20523000	22046000	27774000			7375700	8826900	11067000			1186200	9253100	9024400
gi|116075964	10134000	6916600	8800600			22892000	24080000	20316000			38392000	38249000	19182000
gi|116075966	51467000	40442000	28251000			85567000	75496000	29157000			56168000	60763000	53961000
gi|116075969	28675000	25147000	32275000			14019000	19456000	16545000			15765000	11316000	17817000
gi|116075971	6398100	5426800	7712600			2737500	3617900	2769400			15790000	19768000	21874000
gi|116075972	2188400	2386300	4834900			296430	462480	434270			719520	728690	481170
gi|116075974	23616000	22915000	20907000			4973800	6721200	5635100			2658300	5541700	4754900
gi|116075975	10583000	9039100	11872000			26180000	37877000	37281000			30083000	24953000	22246000
gi|116075978	1016600000	1064600000	1395500032			1465600000	1552800000	1818300032			917000000	899699968	865680000
gi|116075979	85440000	89711000	64166000			102590000	126840000	147680000			98792000	174060000	80628000
gi|116075981	6408700	6064600	6688300			18248000	32545000	21205000			6432600	6628400	5435500
gi|116075982	1194000	1243300	1044200			4502500	3242500	2805300			2936700	2444200	2391600
gi|116075983	10409000	9153400	8690800			22465000	19879000	15853000			6787500	7958100	13613000
gi|116075984	172220000	93912000	170030000			211580000	184740000	224710000			212100000	155120000	233730000
gi|116075985	0	802450	0			-	-	-			-	-	-
gi|116075986	109750000	94283000	101880000			149600000	130420000	122170000			77104000	88494000	109290000
gi|116075987	90394000	89050000	68072000			80867000	87623000	85054000			79165000	49290000	84041000
gi|116075988	121610000	118070000	170740000			805049984	773840000	1025500032			206460000	142580000	239220000
gi|116075990	2983300	3162700	1812600			10791000	9253100	14517000			3747600	4216400	3422700
gi|116075992	19410000	18814000	12788000			62258000	77636000	69999000			44948000	28729000	21713000
gi|116075994	4532100	5441200	4058600			9454100	7675400	14703000			12733000	5174300	8978500
gi|116075996	282940000	378100000	429240000			534940000	764200000	1006300032			214750000	460080000	445369984
gi|116075997	2032200	0	0			-	-	-			-	-	-
gi|116076002	138890000	145010000	156990000			162270000	177220000	168620000			145630000	202390000	154480000
gi|116076003	738700	590420	1206600			23350000	23739000	21947000			3730300	4777900	4814300
gi|116076007	1119200	1430200	0			3255100	3081100	2568200			1621500	2004800	1961400
gi|116076009	24799000	29457000	23652000			91467000	65049000	91164000			88819000	107230000	94266000
gi|116076010	6954299904	8457699840	9408000000			9554599936	10330999808	9232199680			12705000448	17923000320	15372999680
gi|116076012	1509000	1245100	1615000			23248000	4240700	11855000			54426000	52165000	45612000
gi|116076014	110340000	111740000	225650000			50881000	52613000	64938000			0	25483000	32198000
gi|116076015	10752000	10887000	10620000			12333000	9960400	7063100			12974000	12005000	15544000
gi|116076016	18931000	23422000	24151000			30603000	27489000	31680000			56631000	54388000	51183000
gi|116076017	1038400000	1070700032	1504300032			647390016	629009984	879600000			1299900032	1935500032	1513299968
gi|116076018	91999000	88147000	82245000			8893000	6392600	5177200			11819000	15268000	19535000
gi|116076020	18889000	19595000	17432000			46708000	36962000	52734000			16369000	15191000	11533000
gi|116076022	37030000	51174000	43653000			73820000	58921000	45925000			9686200	13149000	9489200
gi|116076023	4642200064	4235800064	3021299968			2910700032	2428100096	2224900096			4517000192	5361900032	4886499840
gi|116076025	310750	0	0			-	-	-			-	-	-
gi|116076028	21321000	18339000	24597000			10023000	7538800	9840900			4631700	5796200	6873300
gi|116076029	1886300032	2144700032	2095000064			2138400000	2298500096	3463200000			1064600000	1527900032	1482000000
gi|116076031	433690	496300	0			4929500	2920100	1873400			1066800	1400800	1081600
gi|116076032	6381400	6435700	5635500			6915400	5370400	6733500			0	980480	914580
gi|116076033	67067000	77525000	46941000			35314000	29405000	21999000			95775000	83208000	93092000
gi|116076035	86979000	77964000	49033000			220550000	173440000	120810000			162830000	147200000	191050000
gi|116076036	2938900	2860500	2011800			10931000	7703300	6198100			0	1168200	1780600
gi|116076037	3723400	2752200	3478400			8405200	9556800	9947000			1735400	2181700	3368000
gi|116076038	12640000	16537000	15811000			58841000	79155000	45642000			5877900	22005000	11104000
gi|116076039	328049984	197730000	371400000			495280000	553920000	487560000			734209984	651350016	787059968
gi|116076040	579169984	587600000	639270016			810280000	885070016	740200000			632710016	780689984	650899968
gi|116076041	29113000	31330000	24055000			138810000	124620000	130010000			8817800	11610000	12379000
gi|116076042	678640	1372900	2991200			1029500	677930	1041900			163200	248040	226130
gi|116076043	1142400000	965289984	859340032			2300999936	2709700096	3957900032			2129799936	669539968	1273100032
gi|116076046	1595700	1547100	1892900			3629400	2186700	2234500			0	725730	887020
gi|116076048	185860000	135890000	218360000			117640000	131630000	136360000			57181000	40001000	43955000
gi|116076049	7597500	19162000	9761000			10813000	11756000	11431000			4939600	3238100	3876700
gi|116076052	1229900	1215500	1819100			3483200	3118100	2792100			1402700	1480100	0
gi|116076054	10901000	8188900	12638000			51058000	52407000	39821000			11730000	12680000	11926000
gi|116076055	629850	758940	585480			5007400	4463100	3789300			0	653350	840250
gi|116076057	175740000	215590000	271180000			273580000	183660000	147940000			94283000	81804000	61998000
gi|116076058	33694000	27593000	26235000			25693000	22337000	16237000			14649000	17350000	21081000
gi|116076059	257270000	204310000	160290000			243530000	212370000	106080000			46882000	70791000	75201000
gi|116076060	30066000	28519000	32812000			14964000	18378000	21310000			66155000	77112000	69370000
gi|116076062	2891000	2918600	2491000			2907000	2524500	2119100			2855900	1752300	1769800
gi|116076064	7809100	12010000	5105200			4107000	2485100	3079800			1978100	3045200	1527900
gi|116076067	0	0	1623900			3571200	2800900	4177000			3294000	2856700	2156400
gi|116076070	64330000	72319000	52313000			-	-	-			0	0	4285800
gi|116076071	3144300032	3152000000	5359699968			4891200000	4465399808	3706800128			8045499904	10284999680	9029499904
gi|116076072	72516000	72424000	67306000			75549000	47629000	51640000			1882100	18550000	17072000
gi|116076073	632070016	870899968	598830016			4647500	5033200	4526900			2521100	1941800	2120600
gi|116076081	8018500	18290000	7519200			-	-	-			-	-	-
gi|116076082	36465000	32293000	29744000			71025000	91708000	55098000			35215000	35083000	33973000
gi|116076083	11469000	11907000	13547000			86189000	60280000	57280000			18169000	29117000	29191000
gi|116076086	358230016	311369984	340480000			260860000	275460000	145950000			320160000	429969984	400049984
gi|116076088	770060	588700	766400			2943000	2267800	2361700			0	328910	357370
gi|116076090	183090	0	0			-	-	-			892240	884040	1820900
gi|116076091	19332000	19673000	34038000			172950000	219580000	158320000			138980000	213600000	158700000
gi|116076092	4351600	9839900	5042700			7126600	9051300	8254400			906780	3171900	3531000
gi|116076094	20318000	19139000	19114000			12543000	10851000	11580000			0	3064800	2724300
gi|116076095	5598600	4795500	4115200			1894900	1590100	3707900			0	7361000	5030400
gi|116076099	7284900	10830000	13432000			16700000	16216000	15726000			12764000	11174000	13268000
gi|116076100	12109000	12016000	15785000			20342000	20713000	15401000			26249000	31289000	14519000
gi|116076101	1102300032	1066099968	1004600000			2469799936	1793100032	1510800000			1612800000	1519800064	1471100032
gi|116076102	180320000	186810000	192900000			168430000	145060000	175170000			162760000	251810000	198170000
gi|116076103	34378000	35587000	20372000			41576000	33510000	34497000			38702000	31786000	29357000
gi|116076106	9359800	10415000	11833000			3994100	2844400	3573500			3283800	2971100	1781800
gi|116076108	288440000	284960000	274590016			502920000	542870016	456889984			205730000	137050000	144130000
gi|116076109	11929000	14135000	15853000			44858000	19496000	45546000			6525900	19627000	14891000
gi|116076110	33583000	18461000	27196000			116050000	98687000	130800000			21873000	26578000	29422000
gi|116076113	0	1470900	1622600			-	-	-			0	0	559550
gi|116076116	41357000	25651000	34948000			36289000	40746000	112820000			69015000	52087000	46885000
gi|116076117	9576600	10934000	14287000			141720000	130530000	110460000			7469500	11813000	9629200
gi|116076118	40529000	38401000	52613000			20575000	10540000	18301000			14726000	16998000	14450000
gi|116076119	7893300	12025000	11562000			9979400	12397000	15743000			22308000	0	21991000
gi|116076121	3495700	3483300	5048900			11939000	11290000	10086000			6046100	7598400	5742300
gi|116076122	416609984	437160000	396440000			1106800000	1254099968	1587399936			303550016	231600000	233930000
gi|116076123	4116600064	4614700032	2746099968			6452800000	9191100416	9363300352			7367699968	9304999936	7193299968
gi|116076125	28989000	12497000	23412000			71661000	63790000	54636000			32054000	46406000	35056000
gi|116076127	10053000	16593000	16266000			8586800	11542000	7822700			3838700	4523700	5230400
gi|116076129	35207000	18436000	24476000			37335000	58851000	85339000			127700000	112630000	97138000
gi|116076132	890270	0	0			911490	505580	4371200			0	0	594280
gi|116076133	6846300	6959400	7365300			4034600	5228900	5111900			9916900	13292000	7862000
gi|116076136	1886700	1590000	2481900			3223000	2935400	2461000			1829200	2784500	939730
gi|116076137	406500	0	0			1185300	1430000	1028000			-	-	-
gi|116076138	67938000	50223000	88590000			93927000	64246000	54031000			8301200	16546000	24947000
gi|116076141	3051500	2382000	3407400			2060500	1683800	2236300			0	457840	759900
gi|116076142	4874000	4571200	0			1111000	1173000	0			-	-	-
gi|116076143	75544000	83442000	84277000			246260000	217550000	214140000			86549000	128890000	103540000
gi|116076147	1333200	0	0			3712000	2988200	2045600			0	320430	433340
gi|116076148	87332000	90387000	191140000			108780000	183630000	173880000			199420000	170620000	190740000
gi|116076149	26476000	22082000	24205000			123010000	113720000	81310000			42145000	49962000	59783000
gi|116076154	126650000	98042000	101860000			184390000	145680000	125980000			52695000	52231000	39266000
gi|116076155	53278000	44339000	32517000			14631000	15430000	29224000			43901000	43765000	44152000
gi|116076156	5472900	4955000	6472800			8243000	5519800	0			7108000	3314300	6715300
gi|116076157	164370000	160320000	226150000			286870016	268660000	268460000			142650000	154710000	141480000
gi|116076160	13911000	16585000	18530000			47690000	55317000	52521000			38277000	38094000	34543000
gi|116076161	66603000	94131000	101310000			290640000	175320000	200520000			40522000	67518000	61345000
gi|116076162	72642000	50940000	69390000			149170000	157990000	172530000			295630016	184240000	293520000
gi|116076169	315249984	251620000	207650000			223470000	405580000	380990016			390340000	355960000	474529984
gi|116076170	2580800	2342700	0			2296200	2061500	14891000			3772600	2529900	3038200
gi|116076172	3368000	2757300	2779000			0	0	994820			1658800	0	0
gi|116076173	283550	283620	466340			6088000	5792900	4343100			983050	503810	701180
gi|116076175	135320000	159850000	136390000			421390016	481529984	428070016			145310000	149450000	219760000
gi|116076176	993870	773590	729180			8424500	6715200	9118700			14701000	8516000	8096000
gi|116076178	2161600000	2102300032	1228999936			3242099968	2630099968	2713999872			1475600000	1456099968	1519100032
gi|116076179	21989000	13348000	20932000			43506000	24353000	47867000			43179000	34242000	30759000
gi|116076180	430380000	442660000	487300000			1175500032	1014800000	1093100032			489849984	475350016	540190016
gi|116076183	19417000	22556000	17966000			12569000	11647000	8527900			1202400	4534500	6388500
gi|116076185	224300000	221560000	246140000			224380000	239220000	226440000			62587000	53786000	48491000
gi|116076186	1422599936	1223399936	1242000000			1458300032	2148800000	2879099904			2191699968	2094899968	1912899968
gi|116076187	140940000	162160000	153420000			243530000	262370000	322849984			132610000	147770000	115880000
gi|116076188	2415000	1895100	1856900			5197700	5391200	4092800			0	0	538260
gi|116076189	145060000	123780000	114750000			222320000	193430000	182490000			85153000	66448000	64499000
gi|116076192	32966000	30227000	31347000			87188000	76120000	50487000			36318000	33212000	71720000
gi|116076194	66316000	63884000	57465000			264150000	186970000	289809984			189480000	139730000	110670000
gi|116076195	1202300	1505200	1379600			-	-	-			997390	1093600	1428800
gi|116076197	633510016	689089984	700470016			837369984	780329984	1287800064			844080000	561440000	704809984
gi|116076198	82740000	91713000	96690000			148880000	118180000	139940000			44733000	35021000	45655000
gi|116076200	134930000	131700000	150480000			344680000	489640000	500929984			171970000	192540000	160220000
gi|116076202	146490000	122190000	158280000			228690000	295769984	224060000			41772000	81270000	112610000
gi|116076203	298350016	350849984	351180000			532350016	906750016	424030016			1043900032	665900032	808889984
gi|116076207	3907500	3832300	2819400			12870000	7906300	6812000			4721500	5248800	6522200
gi|116076211	91182000	100800000	122380000			85349000	78012000	55469000			72200000	51807000	43873000
gi|116076212	7705600	4580000	17325000			5758800	6062400	7738700			226490	483380	695130
gi|116076214	4979899904	5311600128	4539100160			3466700032	3260499968	4657200128			3027000064	3030099968	2298400000
gi|116076215	13484000	12851000	15465000			43286000	35870000	34707000			39645000	51531000	35207000
gi|116076216	87962000	62689000	91333000			319550016	200390000	210850000			58424000	86655000	76717000
gi|116076217	28649000	16498000	11205000			186440000	180150000	517780000			325140000	136360000	123390000
gi|116076219	0	0	7808700			-	-	-			-	-	-
gi|116076220	218280000	262280000	316950016			302150016	364460000	413950016			302049984	710070016	283460000
gi|116076222	27266000	28415000	26377000			25999000	19660000	17341000			10410000	10676000	13156000
gi|116076223	315830	0	0			0	0	232860			680750	0	0
gi|116076225	715220	531900	0			5842200	1959400	0			-	-	-
gi|116076226	149350000	159380000	127350000			219790000	220370000	287009984			95366000	76330000	102650000
gi|116076227	59905000	60732000	67947000			89266000	64614000	72573000			47904000	75079000	54197000
gi|116076228	93074000	110390000	152510000			246430000	314049984	243100000			252780000	234260000	259400000
gi|116076229	3125600	3450400	2967400			12247000	15686000	12109000			1956800	2825500	1418800
gi|116076232	1301500	1431100	0			-	-	-			0	2067100	0
gi|116076234	196360000	184900000	97349000			399129984	480700000	521990016			164690000	167110000	162880000
gi|116076237	418070016	462950016	430120000			60402000	67616000	70931000			258030000	213260000	290760000
gi|116076244	13573000	16167000	19023000			15141000	19285000	15586000			16080000	24941000	24040000
gi|116076245	6855700	7217200	6964300			4626900	4879500	2998700			23284000	26436000	36090000
gi|116076247	183560000	246500000	251300000			42132000	37196000	52213000			217570000	166540000	159080000
gi|116076249	0	0	795980			4109800	4288700	4793400			-	-	-
gi|116076250	559379968	502720000	488580000			504860000	343080000	371600000			491169984	515449984	477680000
gi|116076256	172650000	124950000	127720000			76148000	83083000	109050000			67577000	87743000	72242000
gi|116076257	51052000	41040000	54874000			131430000	115850000	81085000			36387000	94144000	67385000
gi|116076259	259300	249020	237450			1486600	1143400	981120			468230	800050	403480
gi|116076260	367560000	536569984	483710016			1087100032	1475399936	1296000000			668620032	365980000	438409984
gi|116076261	7281900	4843800	4943700			15200000	13268000	8550800			12465000	12051000	11448000
gi|116076264	7766900	5903600	5585300			74059000	63937000	106490000			34372000	40431000	20818000
gi|116076265	33285000	32385000	31347000			30462000	34872000	33274000			5411300	8732100	9972500
gi|116076268	943980	748000	1359000			2475100	2951800	2325900			0	985760	0
gi|116076269	137020000	110360000	146990000			32878000	27868000	26346000			19882000	33312000	28088000
gi|116076270	30122000	27994000	31165000			20629000	19812000	19522000			11364000	14071000	10903000
gi|116076272	266310000	316200000	262170000			728499968	860579968	722499968			470100000	785080000	454600000
gi|116076276	9168600	9705200	9924800			30509000	33883000	26753000			4715200	7114000	7722400
gi|116076277	13831000	16860000	20819000			-	-	-			-	-	-
gi|116076280	2519399936	2701600000	3622000128			3228600064	3863699968	4792200192			3562400000	3287200000	2902599936
gi|116076281	1250300032	1159600000	998489984			812169984	1105900032	994160000			1993600000	1742700032	1995500032
gi|116076282	7060900	5854600	7563900			2827800	2147400	2707300			14506000	14467000	12826000
gi|116076284	31175000	28810000	22238000			93805000	80913000	128670000			23189000	21612000	13484000
gi|116076287	61366000	78707000	63109000			64362000	54776000	56821000			25092000	34105000	28367000
gi|116076288	151950000	139640000	73666000			171050000	127930000	171100000			197180000	200780000	217670000
gi|116076290	15330000	17525000	10801000			28567000	18156000	28698000			14594000	14785000	15884000
gi|116076291	0	2975600	62999000			4877300	4241200	3076700			-	-	-
gi|116076292	1988300032	2193499904	2873200128			1628899968	1639299968	1181400064			2602099968	4239699968	2444400128
gi|116076293	3085800	1712800	5025300			-	-	-			0	0	4819700
gi|116076300	811550016	716230016	901710016			1038000000	879910016	1048300032			584089984	613529984	639299968
gi|116076301	19875000	19745000	23326000			18672000	10427000	13595000			0	5614000	5537400
gi|116076303	1385600	1361200	0			4879600	6098700	6876500			0	605230	513570
gi|116076304	3324700	3582600	3261600			5246800	4426700	3353800			4096800	6064200	7052100
gi|116076305	837529984	698049984	809920000			863740032	1047400000	1143500032			1210499968	1507900032	1394400000
gi|116076306	0	624510	454650			2554000	1993500	1518600			3065600	1881300	3376100
gi|116076307	4058400	3696400	5349200			2255500	3951200	4205600			0	4062600	0
gi|116076309	4956500	4538800	5040500			6282500	3733600	8912000			11674000	6504100	4746600
gi|116076310	121370000	126310000	131220000			121130000	101070000	108800000			99568000	97757000	87919000
gi|116076311	2112700	6698100	1010100			-	-	-			463760	994040	648690
gi|116076312	2562800	1916400	2760600			5454500	6203100	5770400			1627400	2316400	2906700
gi|116076313	23487000	24538000	24022000			19755000	17187000	27471000			48158000	46081000	39772000
gi|116076314	945100	0	1038300			0	0	1845500			3536600	3069700	3160400
gi|116076315	328480000	328889984	302800000			237350000	228510000	181290000			481710016	432200000	408940000
gi|116076316	108330000	107050000	124640000			51651000	60177000	31423000			105560000	191520000	167480000
gi|116076319	73200000	59137000	70789000			37408000	45948000	39938000			41570000	49603000	46382000
gi|116076320	1975600	2294100	2352300			1206000	1578500	2104400			0	191790	226230
gi|116076321	21671000	22399000	21717000			36889000	43341000	22826000			14459000	0	30683000
gi|116076323	2503500	2006900	1357000			4909000	4624600	4302700			-	-	-
gi|116076324	7066900	6747700	5318900			5985000	5727400	7449400			12137000	7689100	6591700
gi|116076325	172880000	154620000	136870000			190950000	161790000	146800000			29245000	36272000	41689000
gi|116076326	9753100	8246100	0			13566000	13070000	7702200			8893900	2318100	14048000
gi|116076327	1899900	2422900	2788200			24667000	20668000	21382000			5828800	4765100	3637900
gi|116076328	1300300032	1417799936	1619000064			2163699968	2460199936	3341600000			749529984	631529984	731680000
gi|116076329	46613000	59346000	50725000			6209700	4182000	4499200			0	1167600	1010300
gi|116076330	260070000	304240000	386790016			459729984	465380000	505190016			78556000	63722000	102020000
gi|116076331	46123000	45874000	72425000			116630000	100940000	119720000			137800000	149850000	179730000
gi|116076332	119330000	104080000	103550000			188170000	159400000	180530000			104140000	90162000	93510000
gi|116076333	6634400	7599900	6944600			57199000	55008000	48159000			0	5312100	5973400
gi|116076335	43713000	60316000	74019000			56015000	44707000	44372000			33938000	19915000	23367000
gi|116076338	25893000	26147000	24348000			73400000	65361000	58062000			15601000	21364000	19949000
gi|116076340	263170000	236640000	364760000			305089984	287830016	498030016			508929984	330049984	376489984
gi|116076341	3564700	4089200	8385300			15351000	15782000	9849700			8003600	12460000	11564000
gi|116076343	83655000	81867000	120150000			65320000	64862000	59158000			2153900	38254000	39366000
gi|116076344	1244800	1251200	2338900			5393700	3091900	2362600			2600900	2741700	4181800
gi|116076345	99584000	111300000	143060000			114430000	138770000	124350000			158920000	178670000	184900000
gi|116076346	3577000	3031400	6853300			5822400	9096700	11235000			288370	0	605870
gi|116076348	41178000	54248000	34714000			37315000	19243000	23418000			4722900	5784000	6279100
gi|116076350	1135900	1106300	0			5051200	3341700	4494700			0	1545800	1310400
gi|116076351	43110000	42087000	38747000			52229000	38861000	36983000			0	15439000	13880000
gi|116076352	67028000	139340000	74286000			11572000	9923400	6062600			21412000	51844000	34207000
gi|116076353	160010000	157600000	169030000			228360000	242750000	251570000			335980000	250400000	210350000
gi|116076355	12005000	11478000	6076500			48833000	31611000	29441000			14564000	26788000	26354000
gi|116076356	131340000	126690000	92010000			418380000	390150016	461910016			233810000	204110000	225820000
gi|116076357	166280000	182320000	199480000			242540000	260700000	438910016			193690000	273080000	251070000
gi|116076358	190340000	132300000	15745000			928870	0	0			2089400	0	0
gi|116076359	15417000	8818400	11085000			3924300	1903200	1559500			0	471110	959330
gi|116076360	142000000	123650000	88770000			162850000	121100000	150960000			265730000	230620000	235850000
gi|116076361	155930000	123890000	162180000			237490000	218790000	318880000			278240000	209480000	102950000
gi|116076362	105750000	94709000	101100000			62155000	55915000	68557000			3287000	13343000	16602000
gi|116076363	92757000	63972000	79556000			34316000	23492000	20394000			7610700	17283000	19957000
gi|116076364	3421400	4543100	3767700			37640000	37796000	38398000			0	6968100	5365600
gi|116076366	5961500	8668900	7317000			12801000	11864000	9072700			5322400	9162600	6920900
gi|116076368	2052000000	1826200064	2242200064			1898700032	2190299904	1727600000			1443500032	1544300032	2288800000
gi|116076369	217830000	238510000	259360000			231890000	273260000	306300000			52378000	73154000	78316000
gi|116076370	195070000	162010000	231640000			273220000	327720000	241820000			64172000	73117000	101580000
gi|116076371	31431000	37693000	42424000			262960000	226720000	189380000			118410000	173320000	131340000
gi|116076375	104350000	84657000	91753000			661960000	580489984	744380032			531960000	239430000	272569984
gi|116076376	26253000	40257000	26074000			0	9678000	0			29363000	0	19531000
gi|116076378	0	5198200	0			-	-	-			-	-	-
gi|116076382	2145900	1907000	1840900			5554100	10079000	7812500			4872500	3413000	4780500
gi|116076383	17362000	21156000	26338000			41224000	36303000	43860000			33058000	26069000	40189000
gi|116076384	174940000	138640000	163700000			3217600	2975000	1980900			0	462000000	343780000
gi|116076385	322009984	326040000	302929984			657760000	623740032	520590016			192890000	232220000	185600000
gi|116076386	64926000	66520000	84068000			107870000	133140000	134690000			31573000	49895000	68064000
gi|116076388	285600000	595249984	204410000			48187000	32305000	45009000			267820000	317409984	180040000
gi|116076389	1983400	1598400	2795800			9476200	9853600	10939000			2967400	2985000	3456000
gi|116076390	944280000	1032499968	17755000832			-	-	-			-	-	-
gi|116076391	39947001856	32013000704	42664001536			23204999168	26288001024	22866999296			41236000768	48193998848	49985998848
gi|116076394	544940	1139200	781790			2730600	2442100	3419300			2800400	2026100	1757800
gi|116076395	71499000	65607000	83793000			96182000	76653000	46368000			59527000	82122000	92372000
gi|116076398	17230000	18043000	15411000			41104000	46013000	46543000			27365000	33625000	28902000
gi|116076401	31645000	33236000	33558000			25865000	20192000	13766000			24862000	33433000	26438000
gi|116076404	6980800	6848900	4728300			66803000	64002000	48614000			49534000	48965000	52223000
gi|116076405	6458100	6811000	7513800			4650900	4955600	6058000			2921500	18370000	16623000
gi|116076406	820979968	782800000	953409984			1222599936	1184400000	2435399936			1694200064	2242599936	2291800064
gi|116076407	10563000	11940000	12099000			10441000	6817200	7328400			5715500	5333600	6249600
gi|116076409	28344000	23730000	60044000			47746000	47117000	30637000			39434000	30155000	66577000
gi|116076410	6693900	7439000	7852500			87559000	72590000	60045000			9305400	14397000	9467300
gi|116076416	64938000	48143000	49858000			58961000	49347000	42667000			73455000	58058000	64050000
gi|116076419	7565000	9953500	10026000			29676000	34446000	35201000			9295700	12847000	13249000
gi|116076421	17521000	17485000	21115000			17871000	19074000	39138000			29924000	14825000	17373000
gi|116076422	2578800	2671700	3302900			13221000	9366300	12233000			1519800	1397400	1442300
gi|116076423	14028000	12544000	8877700			141420000	45169000	87651000			26572000	82509000	95961000
gi|116076424	86315000	101480000	104140000			294660000	306369984	319790016			155330000	127070000	178490000
gi|116076427;gi|116076322;gi|116077586	29633000	29832000	17977000			43642000	42802000	46344000			41247000	56169000	61509000
gi|116076429	1733800	1832100	1086400			3199000	2971800	3319300			2754700	925270	1234700
gi|116076430	11068000	14209000	14421000			60693000	59368000	69416000			46845000	54402000	48431000
gi|116076431	609379968	540240000	573619968			668889984	590099968	672960000			1382400000	1055699968	855840000
gi|116076433	84203000	79946000	71541000			143610000	158200000	126080000			72434000	57917000	69151000
gi|116076434	391169984	364840000	393020000			528809984	575969984	683569984			376390016	423540000	416460000
gi|116076436	4044100096	6704699904	5345800192			11416999936	9122400256	10551000064			4711600128	4241200128	4899999744
gi|116076437	71410000	92772000	90056000			213980000	252740000	250600000			53536000	114950000	98920000
gi|116076439	31686000	20019000	16139000			60961000	43727000	37656000			32827000	43987000	15127000
gi|116076440	17444000	16270000	11462000			11635000	9292400	10947000			18970000	15139000	15743000
gi|116076441	14645000	8482800	11176000			57782000	60740000	49969000			17950000	13558000	9900000
gi|116076445	0	0	4352800			-	-	-			-	-	-
gi|116076447	2785100032	1659299968	1423100032			3489799936	1816999936	2609900032			4090200064	3089700096	4225999872
gi|116076448	10635000	14002000	9188700			12649000	10864000	7459800			8936800	5487500	5623700
gi|116076449	47064000	64348000	45954000			125840000	104350000	114670000			86526000	135130000	125280000
gi|116076450	47923000	48572000	42889000			76334000	55477000	49368000			21760000	35154000	30608000
gi|116076451	1066600	1144200	1456300			0	258400	0			722220	661410	0
gi|116076452	2496400	2207100	3395600			2202500	3772700	3814900			2923900	3630700	2900200
gi|116076453	509929984	663169984	702790016			515609984	506849984	550630016			737969984	783480000	598929984
gi|116076454	1353200	1180700	2185400			2410500	3576700	3589600			2311700	1275000	1439800
gi|116076455	33710000	38587000	34898000			51520000	40748000	35703000			13012000	21388000	22770000
gi|116076456	0	1566600	1787100			-	-	-			-	-	-
gi|116076457	20204000	23818000	19288000			53656000	33557000	35082000			15056000	12033000	15561000
gi|116076459	1712400000	1687800064	2157700096			1441900032	1728000000	1631500032			1605600000	1654400000	1863900032
gi|116076460	38146000	37664000	33345000			182340000	201070000	211680000			259270000	174470000	212380000
gi|116076462	839820032	807100032	594910016			483310016	288760000	296700000			342990016	326649984	381900000
gi|116076463;gi|116077057	12740000	13528000	12755000			-	-	-			-	-	-
gi|116076465	66696000	64481000	63542000			83917000	92303000	97847000			41956000	46136000	54699000
gi|116076466	41901000	33106000	45856000			11297000	6309000	15238000			30573000	15003000	22626000
gi|116076469	15420000	13208000	18846000			30885000	45124000	40527000			39288000	53551000	31442000
gi|116076471	81252000	79812000	103510000			253300000	446960000	303820000			93296000	98116000	98196000
gi|116076472	2228500	2308300	2015400			6716200	8140900	6855500			14139000	10623000	15013000
gi|116076476	0	413070	0			1371600	0	2001600			1729100	0	0
gi|116076478	706730	821660	945190			1607000	1927100	2617100			1348300	1084000	1433400
gi|116076479	0	0	392160			-	-	-			-	-	-
gi|116076481	66897000	64127000	99994000			101350000	106590000	94575000			178730000	207670000	221980000
gi|116076482	7252500	6283300	5557200			38001000	23799000	31326000			2205900	2094900	2094800
gi|116076484	2623699968	2258299904	2454799872			923660032	1167299968	1083600000			1361600000	870790016	960230016
gi|116076486	548329984	142080000	506350016			-	-	-			-	-	-
gi|116076489	22692000	23474000	16279000			35506000	34926000	27097000			31181000	30811000	23712000
gi|116076491	8709600	7873500	7840100			24793000	19528000	11666000			13324000	12144000	16844000
gi|116076494	6056100	6437200	4913800			6578400	5403000	5062400			8420500	10554000	7936500
gi|116076496	1809100	2266200	0			6502300	6173500	4965500			2482300	0	2351100
gi|116076497	6580200	6601200	5210500			72265000	73258000	50949000			20592000	23261000	20381000
gi|116076498	429940	514010	319970			30963000	37024000	19446000			0	688380	485770
gi|116076500	3366300	1920700	3350400			9500800	10499000	9060000			1731100	0	1779300
gi|116076501	49427000	38944000	36623000			3016400	2258700	3786300			34322000	32914000	24508000
gi|116076504	22014000	27037000	27387000			56269000	38338000	38534000			6558000	8787400	10906000
gi|116076506	177630000	83135000	171410000			75578000	85318000	87789000			157530000	125070000	151200000
gi|116076508	298840000	271360000	328209984			-	-	-			93031000	104620000	69641000
gi|116076509	281160000	221800000	202520000			370580000	467289984	355369984			810310016	680390016	486689984
gi|116076512	38931000	38413000	39988000			18543000	20585000	18136000			33623000	36717000	29343000
gi|116076513	2416600	2851100	2599700			24813000	25032000	17401000			2178600	1650500	1185100
gi|116076514	18189000	18822000	15228000			10567000	12551000	19194000			13118000	18218000	4969400
gi|116076517	520930	706480	674360			-	-	-			0	299680	314130
gi|116076518	370580000	538560000	556019968			741340032	683459968	807969984			808680000	629560000	475320000
gi|116076519	66366000	61831000	93631000			39122000	43665000	38645000			2379200	7850600	7304500
gi|116076520	7267200	22869000	5088600			-	-	-			645360	1603000	694990
gi|116076521	207900000	226780000	194630000			213700000	200040000	249500000			265080000	465340000	225590000
gi|116076522	4439500	5693100	3278100			7473400	8016000	4106500			2973500	1778900	1742200
gi|116076523	8846000	8767000	8728700			10172000	11280000	11787000			7212600	7517400	7747900
gi|116076525	1657200	1999000	1474100			3399600	3250300	3867500			0	1486900	1241200
gi|116076527	263880000	197820000	245530000			397120000	326220000	432880000			156400000	87797000	143910000
gi|116076534	169850000	179510000	125770000			346009984	407720000	389929984			411820000	400320000	340910016
gi|116076536	2949300	3837300	0			7663200	8522400	4827400			0	2269700	2835400
gi|116076539	501569984	336700000	687190016			965539968	1318099968	1376000000			597129984	934960000	741880000
gi|116076540	1314100	1270200	2133800			-	-	-			797700	1194100	2040100
gi|116076541	366740000	367790016	311560000			638099968	537830016	659289984			469640000	408249984	445400000
gi|116076543	1627000	2083400	2259900			-	-	-			-	-	-
gi|116076544	30778000	13058000	21499000			101960000	118920000	104950000			11201000	10564000	13041000
gi|116076545	122540000	105600000	90045000			270140000	273080000	291640000			30299000	92935000	65737000
gi|116076547	452360	527150	0			9372300	9278900	11862000			12717000	7562700	10117000
gi|116076548	120280000	80237000	106340000			90929000	103970000	103740000			56212000	37979000	61546000
gi|116076549	1497100032	839560000	1328499968			516560000	1057600000	1095399936			1311000064	934680000	1120400000
gi|116076550	9418200	10583000	9454400			14089000	13496000	19782000			6941700	9739400	6701100
gi|116076551	17447000	25788000	26138000			45806000	30383000	28826000			15277000	7404500	7815800
gi|116076553	1579600	1445000	2518200			-	-	-			2044800	0	1532000
gi|116076555	1681600	1573700	0			1519600	2024800	1503300			1932500	0	3685200
gi|116076556	6744000	8058800	9058800			16004000	10903000	12110000			5543500	5712600	9215200
gi|116076559	808790	384830	728610			-	-	-			529490	0	0
gi|116076560	2234600	2583900	1746800			5206700	4190900	4064400			762810	0	745770
gi|116076561	22977000	30489000	24486000			15215000	12222000	11595000			6176600	10905000	7266800
gi|116076562	0	1834800	1612300			2301300	2129700	4032100			1534700	1713700	1430600
gi|116076563	4504400	5570100	4931300			4854600	4013500	3470700			0	2914900	3695700
gi|116076568	7922500	0	14523000			-	-	-			-	-	-
gi|116076573	361600000	156680000	157640000			444360000	412630016	577830016			121980000	95059000	101600000
gi|116076575	6066800	9419400	9031000			8634000	7976000	8532500			7969500	8813400	7618100
gi|116076576	128370000	115190000	132070000			194530000	115910000	117480000			12151000	27172000	26839000
gi|116076578	264580000	143920000	169240000			233490000	321780000	378680000			132840000	123120000	141150000
gi|116076579	168060000	215710000	178570000			417569984	447750016	423110016			204640000	300260000	182450000
gi|116076583	3275400	4421100	3133800			3241300	4656000	7164100			4388000	4075500	4199400
gi|116076584	46429000	29219000	36948000			53228000	53558000	71588000			24887000	39821000	21727000
gi|116076585	1806200	0	2057100			8773000	6047000	3631300			3363600	0	0
gi|116076586	12449000	9955900	11498000			19075000	34179000	25139000			9685700	15390000	22244000
gi|116076587	62678000	76266000	46595000			94511000	82773000	111720000			71460000	103120000	79157000
gi|116076588	3752900	3022700	3531300			0	635360	0			0	0	8796600
gi|116076589	23055000	22812000	21562000			6522200	5032700	4567200			0	1440500	3797200
gi|116076590	146660000	150020000	167750000			296710016	242440000	277240000			34031000	43404000	56651000
gi|116076593	13837000	14798000	10561000			25881000	26800000	25193000			10574000	9290800	8128600
gi|116076594	20539000	21514000	26706000			120970000	124660000	76830000			17597000	25653000	18584000
gi|116076596	2581500	0	0			9474100	11125000	7812900			2541300	4856100	3653800
gi|116076598	481150	187980	0			5131800	4167100	2397700			0	986400	0
gi|116076600	2982900	3567500	3289200			3986200	4858300	7878600			7022000	5594900	5054800
gi|116076603	156680000	131930000	103230000			103760000	115450000	201680000			188050000	180760000	142020000
gi|116076604	7510100	6841600	8454500			35975000	37379000	32143000			13338000	9598500	16304000
gi|116076605	89390000	112630000	171910000			152380000	130180000	307020000			183380000	205550000	155590000
gi|116076607	13012000	10098000	11102000			32146000	30034000	39593000			17217000	14400000	17984000
gi|116076611	12225000	8855500	11317000			0	5971700	0			2082800	3129800	2123800
gi|116076612	9639800	10771000	10297000			11588000	12370000	10823000			0	4773300	4423800
gi|116076613	7268700	5429800	8864000			32929000	33424000	17514000			17169000	19201000	27444000
gi|116076614	49055000	36801000	33993000			174840000	147210000	106220000			28168000	28152000	23188000
gi|116076616	55807000	65105000	64750000			102130000	74610000	86672000			42446000	28735000	26336000
gi|116076618	4581500	5463400	5055900			6397700	5954700	8324600			1678600	736020	1377200
gi|116076621	3275700	3819600	5141300			1457100	1482900	2346000			0	4172800	3937800
gi|116076623	3667599872	3348499968	3711800064			1775900032	2049500032	2127299968			4450999808	5411899904	4937399808
gi|116076624	42002000	37881000	50632000			74451000	54539000	56282000			24711000	32399000	28958000
gi|116076625	1627600000	1658200064	1711100032			969969984	977809984	880750016			217970000	682329984	754080000
gi|116076626	448380000	444380000	537480000			558339968	588409984	640489984			903100032	810739968	742280000
gi|116076629	6211700	5110000	5320800			8565900	6037500	5830300			0	2706300	3019900
gi|116076631	388550016	271840000	328340000			402340000	305169984	279120000			55173000	49281000	45765000
gi|116076632	0	871760	0			3128900	3531800	3860200			-	-	-
gi|116076633	2404400	2442900	2280900			2323800	2956000	4467000			1274800	3720900	1308400
gi|116076634	9733200	11706000	25556000			20836000	17240000	22390000			0	12373000	13508000
gi|116076635	601280000	454360000	500680000			1931800064	1680800000	1705900032			2091600000	2099200000	1896899968
gi|116076636	79602000	106340000	97781000			171750000	170340000	165500000			114370000	93278000	118810000
gi|116076637	0	52791000	0			537420	736280	0			-	-	-
gi|116076638	59375000	131950000	41198000			4841800	2882100	2571200			5003300	12297000	11110000
gi|116076641	1745400	2001500	1649900			16971000	13626000	12539000			3853600	2941000	4318600
gi|116076642	816890	1024500	896350			1332700	0	0			-	-	-
gi|116076643	25209000	18458000	16405000			7631200	7069900	6933500			12928000	14409000	19366000
gi|116076644	22070000	14415000	16270000			66409000	71668000	85234000			64908000	26690000	42575000
gi|116076645	16934000	21433000	22865000			30010000	23384000	20542000			26367000	27077000	25588000
gi|116076646	23181000	22276000	18665000			25583000	33631000	16408000			10781000	10236000	15727000
gi|116076647	3575100	3040500	4127500			24306000	26527000	31108000			0	7152300	6475300
gi|116076649	139240000	131660000	212420000			134920000	102750000	107770000			50488000	60100000	68132000
gi|116076651	68633000	44320000	68816000			37921000	45053000	61995000			53285000	36507000	64785000
gi|116076652	2350400000	2031200000	2468800000			6664099840	6432500224	10305000448			9636299776	6388499968	5645700096
gi|116076653	64298000	74575000	57745000			121080000	107460000	61851000			57700000	133750000	67545000
gi|116076656	914000	608750	668130			1906600	1490200	1398100			491050	577190	0
gi|116076657	11190000	12957000	9586700			14750000	11515000	12137000			9064800	9051900	10092000
gi|116076658	824330	698030	0			-	-	-			458330	754860	0
gi|116076660	193780000	249890000	250830000			351929984	365310016	310880000			254310000	258290000	311900000
gi|116076664	4991400	4879700	7005100			80561000	70001000	86328000			5357700	6822600	5652500
gi|116076665	0	910960	0			-	-	-			-	-	-
gi|116076666	241080000	361600000	368640000			420840000	434680000	572979968			168380000	354240000	241610000
gi|116076671	3435100	4249800	5107500			23578000	21455000	24264000			754110	8006900	2839100
gi|116076674	20394000	10402000	10425000			52443000	40355000	80306000			41459000	25281000	16216000
gi|116076675	12488000	13096000	10691000			75767000	55944000	79717000			30086000	56366000	27897000
gi|116076677	228670000	189790000	252520000			327260000	356880000	255260000			124110000	147200000	122870000
gi|116076678	2415600	2571200	2147900			17204000	11426000	14169000			2333500	1427900	1324200
gi|116076681	14071000	9413500	12135000			189740000	162180000	142400000			9059300	7780600	8363000
gi|116076685	161980000	139400000	156330000			315550016	276080000	183870000			76810000	125900000	164640000
gi|116076686	1219399936	1058899968	1118599936			1074400000	1192499968	1132800000			836480000	580200000	1313699968
gi|116076687	7519900	7627500	5869800			7722800	7440400	8471600			2831000	0	7536600
gi|116076688	590129984	585560000	799390016			608000000	734840000	672689984			1007699968	982430016	1065699968
gi|116076689	2438200	1525600	3104000			-	-	-			-	-	-
gi|116076690	15097000	12690000	15483000			4802100	6013600	2916700			-	-	-
gi|116076691	97979000	83454000	157340000			104910000	119360000	82216000			33699000	43310000	30737000
gi|116076693	11124000	15950000	11894000			27249000	37382000	20852000			19997000	28068000	26671000
gi|116076695	2060700032	2673299968	2861799936			5107999744	4125100032	3315599872			2714800128	2569600000	3804300032
gi|116076696	130170000	156260000	197360000			226100000	258900000	271889984			68012000	169700000	171030000
gi|116076697	8159400	6789800	5878200			10150000	7147200	6888900			0	1067200	1291900
gi|116076699	41943000	34278000	43677000			202370000	246420000	278540000			114020000	128990000	96354000
gi|116076700	14557000	9874000	10925000			40460000	19120000	20205000			6391900	17163000	21173000
gi|116076703	14852000	15703000	14620000			13199000	11279000	10277000			8342400	12451000	5755300
gi|116076705	20245000	15759000	20887000			70693000	53431000	29033000			37432000	45980000	33497000
gi|116076706	1102500	1304700	984600			6260200	6992500	5731500			2018800	3570900	4864900
gi|116076709	2473200	2943000	3788700			5704400	0	0			3675400	0	3147500
gi|116076710	4650700	4585100	0			0	3755900	3086400			4232400	6718500	4245500
gi|116076711	73145000	81279000	94567000			182290000	193610000	231540000			285500000	268140000	290590016
gi|116076712	12252000	11281000	12286000			16708000	10931000	8447900			14798000	17138000	12927000
gi|116076713	70666000	38676000	59000000			63165000	60272000	57814000			23713000	30570000	29442000
gi|116076714	3038600	3055700	3090100			3677200	2669200	3108800			0	584300	831770
gi|116076715	29175000	31974000	36205000			257390000	250310000	201390000			115680000	131120000	150100000
gi|116076717	9842900	7385300	10782000			6778100	7868600	6449800			4365000	4428700	5373500
gi|116076719	48059000	42073000	39474000			77768000	53893000	63012000			63349000	72933000	52374000
gi|116076721	6178200	6436800	4384400			4082700	4726000	5480500			-	-	-
gi|116076723	270840000	277280000	254900000			308529984	372600000	387110016			438100000	368849984	370390016
gi|116076724;gi|116077123	24946000	17737000	26612000			17421000	14511000	22930000			48894000	40041000	73504000
gi|116076725	14015000	12255000	19389000			4402700	4386900	4523400			-	-	-
gi|116076727	2981200	3011200	2549200			9538800	8399000	7676300			644650	922770	741170
gi|116076730	10286000	9747800	9971800			15782000	12891000	7142900			2376100	7121200	8028000
gi|116076732	17046000	18297000	13334000			32095000	20429000	22189000			14420000	19082000	15953000
gi|116076733	7405800	8189000	6625900			11832000	10298000	9377400			6497000	6041500	8431600
gi|116076736	121770000	178390000	174310000			271820000	272860000	280880000			254190000	287440000	223860000
gi|116076737	74396000	60680000	80825000			195210000	284870016	253730000			262370000	211330000	145100000
gi|116076740	226220	777590	0			0	662900	778480			-	-	-
gi|116076744	7521900	5816900	11614000			7103900	8880500	14061000			48877000	17802000	44766000
gi|116076747	2302099968	2891200000	2453199872			2817999872	2886599936	2690500096			7889600000	4880500224	4687000064
gi|116076748	44241000	47211000	32142000			87071000	78126000	47151000			52735000	52054000	37487000
gi|116076749	47490000	44675000	34034000			119390000	158600000	184810000			147980000	207950000	123330000
gi|116076751	0	0	1834700			1500500	0	1036300			3437100	0	0
gi|116076752	14204000	19283000	16652000			87385000	64599000	87497000			20624000	21424000	16586000
gi|116076753	4137700	3460700	4878700			3266100	2881300	3913400			0	3502500	2942300
gi|116076754	14197000	15199000	11520000			26298000	22652000	17251000			27549000	20375000	24267000
gi|116076755	985689984	1036200000	889209984			904860032	1020499968	1875500032			810179968	911630016	703580032
gi|116076756	121020000	113610000	92984000			58585000	48727000	35001000			4864600	13884000	21767000
gi|116076757	110750000	112690000	111110000			135660000	93122000	105430000			118290000	137440000	147460000
gi|116076758	2958300	3765400	2756700			28073000	29548000	26011000			22519000	22278000	20701000
gi|116076760	44956000	49045000	64014000			139910000	108460000	105150000			89504000	92028000	90291000
gi|116076761	869720000	975820032	686070016			1095699968	1073600000	934780032			1489200000	1356300032	1319800064
gi|116076762	1142800	1304700	1984900			-	-	-			-	-	-
gi|116076764	1056400	925320	997060			2065200	1268700	1050600			0	281720	0
gi|116076765	70462000	67272000	89460000			50304000	41695000	51085000			2536000	24607000	23742000
gi|116076766	42243000	87942000	18820000			-	-	-			1584200	3306800	2869100
gi|116076768	1950000000	1484600064	1617400064			805020032	1453400064	1722099968			383460000	819740032	787089984
gi|116076769	55673000	68932000	61636000			169210000	132860000	156990000			85663000	64228000	87263000
gi|116076770	94392000	86807000	123920000			169800000	143040000	201560000			117710000	97586000	136120000
gi|116076775	258840000	203110000	124450000			238510000	367449984	324620000			475329984	499870016	480390016
gi|116076777	184670000	177500000	88035000			546889984	632019968	810659968			746979968	590840000	394880000
gi|116076779	157870000	170440000	107600000			294849984	297780000	278870016			558449984	493510016	452960000
gi|116076780	68492000	56958000	64565000			42822000	39906000	49956000			0	18254000	17846000
gi|116076781	2011299968	2098800000	1807399936			2134099968	2008199936	2715699968			1175000064	1379900032	1686200064
gi|116076782	4223000	4369500	4593100			9685400	7365800	5701200			4940100	6447900	5381500
gi|116076786	3781300	5370200	3575600			11381000	14254000	9674100			8951400	9753900	12442000
gi|116076788	59451000	47900000	94804000			94361000	117510000	107250000			25128000	22885000	48842000
gi|116076789	6127800	5911900	7249900			29610000	31669000	35767000			15430000	12390000	7715500
gi|116076791	10302000	10053000	5428900			27347000	17034000	13886000			2603000	4088000	5733200
gi|116076792	569560000	669990016	713539968			1188700032	1209900032	799059968			545190016	598099968	474480000
gi|116076793	2896800	3396200	3782200			12472000	12366000	8885300			28676000	9584200	20755000
gi|116076794	2016500	1915900	3328900			3589600	2555400	1603800			984110	968540	1273300
gi|116076797	2444600	2534100	3453400			12137000	10791000	10189000			6899100	4634200	3330400
gi|116076798	4706100224	4528900096	5109899776			10631999488	11799000064	12764999680			6300100096	4750199808	4397700096
gi|116076799	287190	489940	353810			-	-	-			221260	213600	169300
gi|116076800	10505000	10095000	9699700			13955000	8652400	9270100			1623000	2291500	2294200
gi|116076803	68925000	58733000	47897000			50184000	51417000	30307000			27389000	15417000	28882000
gi|116076804	45532000	43455000	37093000			54211000	35808000	42727000			30951000	28783000	49229000
gi|116076805	261050000	280660000	282510016			429240000	416540000	506729984			527830016	527870016	492360000
gi|116076808	165240000	142490000	126640000			164310000	116750000	114680000			75602000	73091000	91252000
gi|116076809	302300000	297070016	143400000			608449984	552120000	774040000			1302700032	852929984	649299968
gi|116076811	278560000	246720000	243240000			186920000	180030000	180040000			166170000	189510000	199720000
gi|116076812	79039000	97900000	91634000			99374000	106490000	112220000			45456000	51308000	60249000
gi|116076813	14986000	7653700	10443000			43952000	44322000	61065000			33508000	24086000	29904000
gi|116076814	206570000	239680000	223250000			201890000	205030000	258790000			477209984	631889984	569260032
gi|116076815	162730000	157670000	214580000			324540000	404510016	459369984			263320000	120780000	246580000
gi|116076816	33761000	34331000	34651000			40288000	29154000	28777000			1707900	7482800	10548000
gi|116076818	14958000	9835100	11772000			45991000	39905000	33628000			4838900	8576800	7236200
gi|116076819	1955300	1141100	1887700			2361700	2368000	2206000			0	143060	118980
gi|116076820	147240000	135710000	101130000			285540000	185200000	173630000			153540000	169480000	167010000
gi|116076825	190710000	163130000	266540000			270470016	356780000	350550016			465400000	633299968	452920000
gi|116076828	0	0	1221600			2311800	3139000	0			-	-	-
gi|116076829	9893300	11801000	9190800			21634000	20148000	22953000			0	4586600	0
gi|116076830	0	0	23778000			8121200	6067900	3209500			9994200	28898000	67273000
gi|116076832	10003000	15643000	14644000			22883000	16476000	8113800			5032700	2485100	4871700
gi|116076835	31795000	29332000	28832000			21240000	18846000	11269000			13646000	16270000	19397000
gi|116076836	30644000	38119000	36092000			93194000	93646000	101100000			9845100	22028000	0
gi|116076837	2751200	2536300	1818500			4810100	4700700	3835700			1633500	2591600	1490900
gi|116076841	443600000	562200000	480160000			354800000	319510016	338990016			32359000	109420000	113040000
gi|116076842	19090000	9644900	21437000			27095000	24156000	23385000			16216000	33612000	11587000
gi|116076844	4534300	5043400	5120000			23071000	23746000	27845000			3820400	3000100	4895500
gi|116076846	13952000	12872000	4112200			71209000	49142000	47266000			12670000	17910000	18665000
gi|116076848	6783400	6223400	5757000			32912000	20361000	24332000			826720	6469500	6067700
gi|116076849	1704700	1734900	1801100			5184100	5935600	3300400			486420	0	1108800
gi|116076851	338809984	173650000	366209984			135240000	116300000	97496000			34286000	29330000	30948000
gi|116076853	40518000	43182000	43457000			91516000	119770000	152380000			141150000	104220000	113110000
gi|116076856	2592400	3050800	2138000			938090	0	708050			0	0	430910
gi|116076857	6322500	8407400	7804100			12915000	8308700	9035700			0	10594000	0
gi|116076858	21569000	25197000	23553000			31916000	39122000	34664000			50057000	54727000	37948000
gi|116076859	427660000	508089984	470100000			839329984	845990016	814259968			464790016	616929984	542280000
gi|116076861	1896000	1942600	2096900			8298400	6772400	6388100			2478000	4172600	4333400
gi|116076866	102420000	74852000	107550000			119990000	134210000	125180000			169620000	166270000	222910000
gi|116076868	17932000	15774000	21928000			13468000	14166000	10510000			3588600	3473800	5442700
gi|116076869	547769984	554680000	360220000			1397500032	1238099968	1281600000			1002400000	1101799936	1199299968
gi|116076874	33105000	37735000	39023000			56729000	58597000	65727000			13843000	19176000	17272000
gi|116076875	2323900	2445400	2275400			4343700	3516800	3808000			2362300	4898000	2959900
gi|116076879	50995000	45682000	53794000			60319000	69355000	54096000			1083900	17929000	17621000
gi|116076880	23104000	16013000	17537000			15005000	19102000	21808000			17910000	30307000	36616000
gi|116076881	31439000	40004000	35712000			13149000	15999000	17614000			49621000	45976000	90931000
gi|116076885	2291500032	3316199936	2282099968			2354599936	2047399936	1818700032			3048900096	5764400128	3904300032
gi|116076886	20015000	22304000	18907000			28383000	21221000	17417000			8701900	9312400	12784000
gi|116076887	274060000	216570000	355780000			534769984	556609984	354960000			1348499968	240820000	459689984
gi|116076888	687960000	426420000	519169984			747449984	682849984	605470016			426310016	198170000	165970000
gi|116076889	2235000	1386500	2427700			2453300	2151400	2747900			0	965510	0
gi|116076890	11963000	15559000	23250000			44046000	44823000	57475000			22364000	16831000	18521000
gi|116076891	1414400	2075300	1242700			20208000	16526000	9870100			0	669820	1786600
gi|116076892	12273000	14782000	14134000			18357000	20865000	15063000			-	-	-
gi|116076897	29790000	47527000	35535000			98548000	135180000	119460000			125520000	117880000	79943000
gi|116076898	16177000	19968000	21706000			113760000	90024000	112830000			26712000	29506000	37370000
gi|116076899	13232000	10089000	11869000			35233000	29580000	32693000			12430000	9438900	19477000
gi|116076900	61044000	77579000	64828000			84741000	91034000	95414000			30695000	30600000	49630000
gi|116076901	279900000	318990016	335590016			432430016	465200000	621379968			124340000	237690000	237430000
gi|116076902	2138700	2165000	2173600			1224700	1775400	1050800			0	0	181930
gi|116076906	29502000	34638000	33075000			161190000	176150000	186470000			73339000	71931000	68898000
gi|116076907	21139000	18982000	13832000			20980000	16167000	13080000			7698000	9399900	7232900
gi|116076908	39491000	19988000	13790000			54716000	42554000	48099000			42240000	28976000	38036000
gi|116076909	13831000	13878000	13963000			12619000	14048000	20810000			8038500	8336300	5731400
gi|116076910	129390000	101390000	79162000			69630000	63060000	57082000			95972000	86092000	90229000
gi|116076911	64904000	78186000	52798000			175160000	221520000	228800000			213710000	222350000	162360000
gi|116076912	596550016	620259968	399169984			1884099968	1445900032	2033799936			1223699968	1399200000	1052400000
gi|116076914	106560000	107140000	88126000			297720000	285340000	266900000			57551000	67831000	67773000
gi|116076915	2630700	3025100	2100500			39032000	24173000	38935000			1844500	1756400	2456600
gi|116076916	80181000	24907000	230190000			-	-	-			-	-	-
gi|116076918	331040000	367900000	288440000			311400000	287150016	275340000			236580000	299910016	208370000
gi|116076919	118600000	118720000	117070000			166640000	146170000	183170000			203230000	160740000	147890000
gi|116076920	7864100	11824000	9346700			11466000	14481000	41924000			14118000	12301000	7578000
gi|116076921	221120	202720	217170			1828000	3117200	3618200			689050	770140	645420
gi|116076924	171600000	184570000	116890000			416860000	419969984	661939968			556940032	506649984	476680000
gi|116076925	4649900	11796000	7553400			29514000	48439000	53358000			2696500	0	0
gi|116076929	687020	647300	730040			4921200	3807500	6516100			1698500	1399900	1646800
gi|116076933	18417000	25708000	18425000			-	-	-			1155500	1236500	1534200
gi|116076935	1689100	786980	1785600			6953000	4457600	8037300			0	0	3615800
gi|116076936	29494000	32435000	22367000			36191000	29707000	43250000			3848200	5128500	4790300
gi|116076938	3824000	4927800	4035400			11203000	11825000	5363500			1549800	1185500	2239100
gi|116076939	322380000	287260000	235370000			418540000	439609984	606590016			746200000	644049984	554819968
gi|116076943	148100000	200070000	165720000			15135000	9718600	11443000			55048000	65290000	63948000
gi|116076944	101050000	86714000	93516000			82199000	101520000	70356000			92324000	59555000	93263000
gi|116076948	24294000	27745000	27759000			110020000	82548000	101570000			29608000	48980000	60800000
gi|116076950	17258000	19557000	24688000			27513000	24110000	25418000			11612000	7046100	5891200
gi|116076951	4003500	4087800	3521400			22169000	12311000	14724000			9013100	7469000	10434000
gi|116076952	80619000	47556000	64618000			74752000	85069000	86284000			1973600	12762000	9245300
gi|116076953	120910000	88613000	136210000			335340000	220870000	383169984			206870000	206370000	163130000
gi|116076955	877540	800680	1354800			-	-	-			-	-	-
gi|116076957	668520	619640	1870400			7415600	8281300	9865000			6369900	5855100	7470700
gi|116076960	2298300	2555700	2383700			1953300	2415800	3315400			1476700	2100100	2134000
gi|116076961	174650000	210930000	247020000			312830016	291769984	305830016			289769984	380390016	260920000
gi|116076962	36501000	40935000	50506000			37209000	59951000	53212000			55896000	78697000	55866000
gi|116076963	1506500	1579100	1506000			27264000	31192000	19202000			1632500	3084800	3007800
gi|116076965	1222599936	1408800000	1560800000			111660000	106760000	108020000			314240000	271920000	210580000
gi|116076966	964920	1119900	1002600			4625000	3001300	3294400			930320	0	2192600
gi|116076968	11882000	25439000	5241500			1187100	640000	915280			1600300	6892800	6159100
gi|116076969	60426000	56410000	39421000			143120000	200680000	155330000			297640000	254980000	226130000
gi|116076970	3614300	2526900	2724300			6685800	7061500	9052400			0	1383700	1654800
gi|116076971	679430	671650	1508600			0	0	1378900			-	-	-
gi|116076972	1075100	1172600	1417800			6428300	5433900	4654200			1524600	1237300	1425600
gi|116076973	61015000	72312000	121820000			37435000	27648000	27877000			91309000	171170000	118670000
gi|116076974	7129200	5906000	7462100			38303000	35601000	27514000			4401500	2503900	4279800
gi|116076975	4715200	6749600	8296400			7745700	6725200	6669900			20630000	15969000	566410
gi|116076976	2183200000	519329984	1979399936			2609000	3133600	2727800			3423200	4384100	1947900
gi|116076979	118320000	162440000	152870000			26924000	28504000	23331000			12801000	17163000	15835000
gi|116076985	118760000	51820000	60720000			54400000	28528000	37938000			201750000	133260000	206760000
gi|116076986	22465000	19855000	19528000			70971000	68390000	82598000			56632000	62768000	49820000
gi|116076987	8567100	11107000	8512300			15095000	11610000	12594000			4784600	5938800	5340700
gi|116076988	2627700	3198800	3777700			7853700	9792100	17988000			5913600	3319200	3647600
gi|116076992	2611200	2197500	2299000			6757200	7267000	8644100			1928300	1015900	1487000
gi|116076993	10347000	10490000	10890000			7306400	10036000	5899500			8401100	9028800	9529200
gi|116076994	3489300	8287700	18042000			4724600	2691800	14398000			1142300	4779400	1126200
gi|116076997	169750000	146910000	125450000			413220000	343300000	262420000			83376000	107820000	81406000
gi|116076998	81166000	64166000	69141000			150260000	128700000	124940000			21407000	58764000	59179000
gi|116076999	1353400	1883700	2058600			7657100	8797200	11250000			3674500	6270500	3821200
gi|116077001	6759900	4663800	0			2922600	2627600	0			0	0	2352800
gi|116077003	22622000	15931000	27972000			14861000	14293000	11511000			12762000	16162000	0
gi|116077004	5074000	2651100	2822000			1000000	959890	0			13490000	9551700	7824500
gi|116077005	10980000	19284000	16563000			7808100	8327400	7350800			13117000	14357000	13102000
gi|116077007	16912000	20998000	21832000			34807000	31759000	32163000			2741600	8117800	7795700
gi|116077008	1166300	1550700	1086200			2328100	1613900	1641600			0	1283900	1454500
gi|116077009	10763000	10921000	9321000			5212000	1781300	1236300			5426700	5989800	7009600
gi|116077011	829320000	781230016	889939968			1115000064	972609984	1012800000			620129984	574329984	673120000
gi|116077012	14284000	15050000	10355000			19302000	13848000	7341400			17489000	15410000	12365000
gi|116077013	625950016	615080000	337289984			389680000	370020000	488289984			945280000	668240000	870169984
gi|116077014	8772200	8954600	9075800			16678000	17460000	10379000			23619000	20899000	17654000
gi|116077015	48670000	46465000	46290000			128420000	75459000	90421000			26128000	36313000	31267000
gi|116077016	79057000	71137000	54109000			151450000	137700000	100390000			52303000	58079000	60841000
gi|116077017	2354800	2965400	4218200			5722600	6611500	7374600			5688100	6743100	6022400
gi|116077018	19922999296	18677000192	19204999168			29667999744	25688999936	32049000448			40580001792	25873000448	29781000192
gi|116077019	81143000	79601000	73428000			95112000	99544000	150530000			117630000	154440000	112270000
gi|116077020	9564100	12949000	7811400			10598000	17112000	14616000			16123000	14195000	14565000
gi|116077021	0	1142100	0			-	-	-			-	-	-
gi|116077022	72454000	71048000	86276000			212770000	205070000	188070000			81841000	74575000	74278000
gi|116077023	216060000	259660000	249200000			122190000	112670000	137140000			33022000	75351000	71028000
gi|116077024	1585400	2470100	1291500			-	-	-			0	924590	612570
gi|116077025	149170000	123400000	168810000			167510000	193390000	198760000			49916000	87550000	113560000
gi|116077026	27183000	30948000	31971000			15487000	20730000	9544800			42864000	54823000	39008000
gi|116077030	25030000	33467000	24814000			195560000	290769984	384289984			68677000	59351000	53396000
gi|116077031	1961900	2363400	4766400			5191400	3952000	3515200			3276100	2137600	4276100
gi|116077032	0	354020	0			3338500	4260500	4355800			1208600	1419300	1446900
gi|116077034	97697000	86448000	134730000			178260000	112400000	235740000			209390000	184750000	171160000
gi|116077035	5126500	4778900	6155200			14619000	10911000	15714000			3515300	3212000	3374500
gi|116077038	168910000	173670000	154420000			221770000	151530000	116010000			10009000	37405000	35567000
gi|116077042	38594000	43896000	36793000			69136000	70268000	66134000			15735000	5075100	6285000
gi|116077043	23623000	26556000	25264000			102620000	75531000	110280000			38823000	24474000	26671000
gi|116077045	819190	1384000	0			-	-	-			0	965100	0
gi|116077046	6743100	7978200	5676800			29102000	20445000	21421000			6650300	9138300	9642100
gi|116077047	9542400	9453900	8738900			15235000	9745900	8295300			6222000	10080000	8458100
gi|116077050	220260000	221370000	266910000			491260000	408820000	416590016			98706000	149150000	135370000
gi|116077051	3336700	3601700	3598500			25185000	20002000	22051000			0	343000	0
gi|116077053	2647100	3000300	0			4373200	4031400	2906100			2180000	2731800	2479200
gi|116077059	11178000	13607000	1828700			6197300	7590200	7301000			0	219320	226090
gi|116077061	7320400	6176300	5349500			4738200	7188700	7711200			8970100	9858900	10038000
gi|116077062	1327600	2249500	1736400			10187000	7103000	7543900			1657700	1564900	2804100
gi|116077063	65599000	73041000	70894000			226760000	156860000	143700000			37096000	36131000	37730000
gi|116077066	2008300032	1646300032	2288900096			1781400064	1598200064	2861700096			2309900032	2443800064	1569799936
gi|116077067	2666100	2304700	2995700			3865500	2696000	2009100			2019500	5269900	1250800
gi|116077068	6391000	8334600	9984400			11536000	8613300	8750800			5645700	6383500	6617400
gi|116077069	1490099968	1542300032	1487600000			2376600064	1743399936	2405100032			3230899968	2747099904	4391799808
gi|116077070	527060	373360	401470			1050300	1308800	0			-	-	-
gi|116077074	2797499904	2875099904	2556499968			1760700032	2400399872	2137900032			1631100032	1693600000	2128300032
gi|116077075	17291000	18156000	16281000			20518000	13053000	13324000			5600100	6287700	6014500
gi|116077077	5085700	5503400	5434900			25759000	15910000	21158000			5268000	4337300	3461700
gi|116077078	3176700	2805800	2891100			2284700	1717800	2026000			0	0	257340
gi|116077079	43793000	96939000	26438000			9969900	3007500	11557000			8680600	10608000	5839500
gi|116077082	3383200	3375100	3249500			11919000	10173000	14065000			6442200	3552000	4292600
gi|116077083	2118300	2878700	0			14761000	12866000	16240000			4406200	6456700	0
gi|116077084	544350016	665849984	536960000			96447000	72527000	45985000			193740000	449030016	316809984
gi|116077086	23071000	29626000	26783000			-	-	-			-	-	-
gi|116077087	5919600	4979100	5428500			111360000	135930000	115410000			11589000	19717000	14358000
gi|116077089	283569984	237070000	204230000			457110016	387350016	359470016			425049984	230920000	327270016
gi|116077092	18850000	15549000	14263000			26440000	77117000	83827000			14298000	17638000	23828000
gi|116077093	0	618320	613190			5382700	5485100	4636600			1405500	924370	753420
gi|116077095	4417400	5400800	4806600			21993000	18009000	13482000			32772000	24049000	31638000
gi|116077097	7148500	7564300	9448000			14484000	14096000	13816000			5739100	5859400	4950200
gi|116077098	114070000	124680000	100830000			266890000	277889984	262080000			153590000	146130000	133230000
gi|116077099	2428999936	2075000064	2893799936			1322400000	1624999936	1542300032			711990016	1492099968	1676999936
gi|116077101	24068000	15487000	14053000			52641000	47309000	45643000			7645500	3861400	6670500
gi|116077102	202340000	195990000	192850000			210320000	174620000	156930000			48259000	149350000	158880000
gi|116077105	7907000	9521100	10060000			58580000	42242000	18902000			6978400	9224200	8123600
gi|116077106	4231100	3113300	5100400			18435000	14250000	14940000			3324700	2874900	3583000
gi|116077108	72674000	80727000	94906000			266220000	214640000	250430000			75452000	148700000	101020000
gi|116077111	6080700	6562800	5111100			16786000	10127000	12265000			12412000	14185000	14347000
gi|116077112	11224000	14961000	9731800			-	-	-			2795800	3294300	0
gi|116077115	354340000	391809984	501640000			536329984	625009984	659910016			558700032	556430016	557070016
gi|116077119	3887000	4283200	3895800			21806000	16753000	12062000			1872900	3249200	3344100
gi|116077120	502609984	627769984	795260032			794540032	883299968	861230016			639379968	1136999936	1179299968
gi|116077121	2302599936	1960800000	1891200000			1657900032	1336999936	2402500096			4108600064	4927399936	3043399936
gi|116077124	8647400	7899500	7682000			10688000	10310000	8871700			2588400	2983700	3515400
gi|116077125	480900	549240	483670			-	-	-			769520	857030	630780
gi|116077126	1931400	2282200	2508500			8243500	10047000	12714000			0	5180600	6375700
gi|116077129	8641500	9648300	9906400			74460000	60833000	52654000			5998000	4108100	6746500
gi|116077130	57680000	74700000	92877000			63668000	69383000	74500000			64735000	44459000	43229000
gi|116077131	271889984	278590016	272910016			223810000	222970000	198280000			62502000	76796000	64606000
gi|116077135	2715500	3571000	5195200			3137700	1965500	1813000			1465800	3743300	1421700
gi|116077136	5778500	6714700	7306800			1192800	966130	0			0	32250	0
gi|116077137	91925000	78065000	99451000			195420000	184060000	181970000			143280000	148200000	115830000
gi|116077140	118200000	149540000	136170000			463240000	571840000	815299968			328880000	92452000	230470000
gi|116077141	276240000	356680000	358560000			453790016	548529984	461790016			549840000	502529984	427860000
gi|116077143	156730000	140660000	134750000			198780000	159650000	183820000			116570000	159080000	154720000
gi|116077146	78579000	62332000	69375000			136060000	138860000	126570000			77851000	40609000	67074000
gi|116077148	5452800	8596500	6815600			-	-	-			-	-	-
gi|116077149	17703000	13986000	13776000			2773600	3000000	3547500			5727700	0	3718900
gi|116077150	0	776890	987600			-	-	-			-	-	-
gi|116077151	7038600	8964400	5595200			3118700	2465500	2405200			1135400	0	1344600
gi|116077156	2598300	3096700	2731700			3917000	3284700	4641600			2215300	0	0
gi|116077157	7546999808	6196899840	8359799808			10945999872	12764999680	11898999808			15480999936	17642000384	15422000128
gi|116077159	2615700	3290600	2778000			9933600	10933000	12894000			3862400	5197300	3330600
gi|116077160	168530000	144000000	133350000			99276000	127220000	173970000			244210000	276550016	188840000
gi|116077161	4265999872	3849600000	4772599808			5676700160	7406600192	6605700096			5322800128	5138299904	5189300224
gi|116077164	256180000	178660000	186330000			407860000	366300000	375670016			266860000	287680000	262240000
gi|116077165	30324000	32147000	37799000			43365000	63973000	58657000			21890000	15047000	14056000
gi|116077166	15257000	15619000	7334900			30398000	38124000	42708000			0	329920	378580
gi|116077167	38670000	46563000	28776000			50682000	54537000	52953000			10919000	11292000	12351000
gi|116077168	15737000	19769000	12731000			7733300	6472500	6436100			0	23444000	20582000
gi|116077170	72553000	54995000	79732000			89958000	95671000	115570000			98911000	57570000	74188000
gi|116077172	1564700	1703500	1611100			4814700	3517200	7436100			0	0	331830
gi|116077174	11454000	11033000	13263000			22899000	16309000	12046000			10909000	20685000	16365000
gi|116077178	11756000	11491000	8362400			7400400	5786300	9698600			8802300	10615000	7414100
gi|116077179	453880000	432540000	448020000			912190016	968670016	1184099968			261040000	228510000	212840000
gi|116077180	12322000	12985000	813880			-	-	-			-	-	-
gi|116077181	37028000	41267000	40376000			112800000	110250000	118100000			47529000	53455000	46502000
gi|116077184	9588800	7559200	10945000			11132000	13212000	9045900			1468100	2062400	1768100
gi|116077185	15092000	12028000	25889000			80295000	73834000	84778000			18959000	18147000	27963000
gi|116077186	1138000000	1148099968	1338300032			1638599936	1864199936	2408199936			890470016	1392499968	1081500032
gi|116077187;REV__gi|116077187	12890000	30905000	18956000			-	-	-			13772000	12217000	17445000
gi|116077188	9239800	1099400	160960000			-	-	-			-	-	-
gi|116077189	42721000	50339000	49345000			32952000	40310000	48282000			76981000	66434000	42863000
gi|116077191	14906000	17064000	20730000			52694000	52994000	62127000			33201000	34403000	34003000
gi|116077195	147230000	116560000	155710000			87726000	59849000	86668000			36733000	61349000	60327000
gi|116077196	0	0	775580			5952200	5312400	3894600			0	0	1751000
gi|116077197	8611800064	6575499776	10074999808			8676400128	12924999680	13223000064			11219999744	9150199808	10117000192
gi|116077198	33678000	25678000	23912000			8436700	11001000	6384500			959360	3113300	2189700
gi|116077199	317500000	499660000	286900000			296510016	308420000	304630016			196270000	319230016	253550000
gi|116077200	925990	6603600	0			-	-	-			-	-	-
gi|116077201	80718000	83675000	101330000			197120000	180630000	158550000			9673700	19624000	24607000
gi|116077203	65824000	114480000	88280000			189060000	210360000	182110000			157750000	294710016	128860000
gi|116077206	9417100	9631800	9539500			14909000	17672000	12314000			8977000	14093000	9399500
gi|116077207	0	0	3284700			90374000	26650000	0			-	-	-
gi|116077209	8682500	8525300	11525000			7185500	9589000	14282000			5289800	7115000	7114800
gi|116077210	61121000	65655000	50485000			11037000	10915000	12196000			79573000	86431000	74746000
gi|116077211	39734000	39369000	34876000			21830000	23952000	13422000			33743000	19239000	22131000
gi|116077212	1587100032	1384400000	1606800000			2819800064	2765600000	2975899904			1366800000	1996300032	1401600000
gi|116077213	88292000	73038000	73466000			110200000	87339000	86146000			43644000	43498000	38965000
gi|116077214	605070016	391230016	436649984			719870016	657670016	501900000			150580000	215420000	167340000
gi|116077218	35550000	37765000	53176000			87664000	89458000	88050000			7147900	46010000	48222000
gi|116077220	891520	1130800	859330			1121800	0	1780400			0	779560	610240
gi|116077221	5623800	18823000	11236000			9142900	7219200	10357000			19626000	0	0
gi|116077223	4323200	2878100	2846300			15422000	14637000	14060000			16236000	13463000	16029000
gi|116077224	683550016	642579968	726049984			911260032	968150016	755969984			266810000	244570000	384240000
gi|116077225	6782000	5281100	4600100			29374000	27199000	23919000			1582900	0	2752500
gi|116077226	4380700160	4018700032	4534400000			2049900032	2073299968	1937799936			5443500032	4936200192	5306699776
gi|116077228	186270000	182440000	151610000			423689984	552009984	574369984			289049984	320070016	250300000
gi|116077229	90863000	102510000	70714000			51856000	30405000	28005000			0	18853000	22176000
gi|116077230	25393000	32144000	27720000			55759000	51106000	54969000			46171000	38639000	38861000
gi|116077231	6064700	6892500	5649100			14041000	10552000	7770000			1253700	0	1593300
gi|116077232	189410	263420	144530			-	-	-			555060	0	0
gi|116077233	380080000	611219968	735310016			2532800000	3119000064	1950700032			1348499968	1802400000	1901900032
gi|116077234	58571000	56070000	36644000			76437000	57149000	97036000			30028000	23546000	38884000
gi|116077235	14307000	13724000	12145000			19408000	13047000	11939000			2574400	5541200	8858800
gi|116077236	1275600	1332700	0			3166700	2609700	0			-	-	-
gi|116077237	4621400064	4512000000	4937200128			4390400000	4420499968	5578100224			4783000064	1385900032	2571399936
gi|116077238	3306100	3770600	4029800			4924900	8081400	5957700			3524500	3851600	6362400
gi|116077239	1692400000	1446400000	1952600064			4292900096	3595699968	3720800000			3733600000	5501700096	5105600000
gi|116077240	3946700	1285600	1136200			-	-	-			-	-	-
gi|116077242	456520000	459520000	711569984			87136000	222920000	375430016			120200000	166470000	206740000
gi|116077243	0	1174700	0			5273600	4046100	3388300			5119300	4413700	3661100
gi|116077244	3670900	6428800	4407700			5414000	5389700	5414600			4929900	7451000	7358900
gi|116077245	1769299968	1828499968	2167600128			1404000000	1455600000	1638599936			1094599936	1364300032	1286499968
gi|116077246	675310	636990	470070			3283000	2050600	2176100			0	1110100	1867000
gi|116077247	10007000	6418700	8523100			21642000	23144000	16095000			9981100	12499000	12858000
gi|116077249	128300000	128120000	125730000			175030000	189030000	165690000			83665000	66014000	76369000
gi|116077250	721900	529710	712780			3250600	4286700	4095600			416420	485020	543980
gi|116077251	416129984	611859968	647070016			386140000	607169984	316070016			438809984	449870016	551790016
gi|116077252	36469000	47478000	51190000			56007000	39009000	44103000			46197000	56734000	53750000
gi|116077253	322729984	416990016	324720000			533729984	551340032	529600000			59289000	72161000	101370000
gi|116077254	3224400	2743500	5203500			5286500	7997500	8299900			4528800	2579800	3574700
gi|116077255	63930000	85476000	72723000			11662000	15904000	14788000			60871000	76868000	73172000
gi|116077257	439760000	457409984	416489984			1081799936	1004000000	1148600064			1009400000	1910000000	1054800000
gi|116077258	1629100	798820	1754600			4068200	3060000	3214400			0	891860	1441700
gi|116077259	14946000	11918000	2792400			0	5211800	0			-	-	-
gi|116077261	518330	499210	490820			6403500	4713000	4794200			341780	377860	314530
gi|116077263	1060600000	1268499968	1295500032			1788199936	1635200000	2212800000			221350000	611120000	524150016
gi|116077264	145120000	127810000	139810000			75531000	92462000	92706000			128390000	116820000	78842000
gi|116077271	1729500	2164600	2567500			2175300	1859200	1885700			848280	553470	600920
gi|116077274	30423000	31191000	16359000			15114000	17204000	17909000			34296000	34242000	34800000
gi|116077275	13513000	15128000	16618000			16552000	13067000	17929000			62363000	65134000	69403000
gi|116077279	248030000	228540000	254510000			605720000	746720000	765800000			349020000	172030000	251300000
gi|116077281	2819600	3750300	7333300			5913400	5648200	7146400			5082000	10224000	4609500
gi|116077283	5444600	7316300	6624900			18397000	15446000	10693000			0	3313500	3883700
gi|116077284	5525500	7503100	7613100			13031000	7571000	8001600			5781600	7908000	6296500
gi|116077285	230850000	187030000	172560000			158150000	134740000	113830000			149580000	70220000	171320000
gi|116077289	951779968	747320000	904790016			897169984	1764000000	948430016			1066300032	1014600000	778000000
gi|116077292	115300000	128760000	141770000			104910000	128510000	154460000			84416000	195690000	163350000
gi|116077294	680730	896520	480230			2810400	0	0			0	325120	0
gi|116077295	5095700	5942200	6040400			11229000	15975000	10110000			2745800	1994600	4209200
gi|116077296	0	0	6218500			995990	1076600	402930			197170	0	0
gi|116077297	11804000	7685200	21553000			36604000	35309000	32959000			7330800	5903600	14201000
gi|116077298	4662900	1843200	0			-	-	-			-	-	-
gi|116077299	0	0	1412000			3061700	2336700	2213700			-	-	-
gi|116077300;gi|116076026	1113400	1033100	1107600			1993000	1785300	1983400			-	-	-
gi|116077301	2542400000	2252999936	2396900096			3166500096	2527800064	4139599872			4172800000	2757400064	2252900096
gi|116077305	508070	610570	819950			-	-	-			-	-	-
gi|116077306	7525600	13006000	6697800			20412000	12587000	8450300			3698700	7901000	4309900
gi|116077307	632040	657020	679980			1023000	1023600	905920			0	0	266770
gi|116077311	218580000	238870000	299660000			490900000	391720000	460929984			193560000	301150016	309609984
gi|116077312	104430000	86857000	99340000			147930000	117770000	254720000			420280000	217570000	240810000
gi|116077313	592890	0	1196300			-	-	-			-	-	-
gi|116077314	1368700	1302700	1666800			70206000	49069000	57286000			1498300	1272000	2008700
gi|116077315	2299500	6034500	0			106380000	173890000	314020000			241590000	63561000	27383000
gi|116077316	579990016	723350016	979329984			1160700032	1513100032	1006899968			1067900032	1108199936	1196999936
gi|116077317	33311000	21581000	29931000			54484000	64312000	72845000			7901100	18279000	15914000
gi|116077322	2606800	2217700	2783500			5903600	6680000	3047700			0	2095900	0
gi|116077323	598089984	386350016	292240000			436500000	580369984	449240000			931270016	679950016	796510016
gi|116077325	613770	703340	0			-	-	-			-	-	-
gi|116077326	460670016	385420000	481340000			1486599936	985859968	1257299968			1433100032	1531000064	1258300032
gi|116077327	12107000	7561900	10816000			38815000	25742000	19903000			16236000	13991000	11796000
gi|116077328	1904300032	1831100032	1434800000			2893299968	2876699904	3113400064			1922800000	2044000000	2254400000
gi|116077329	5373400	4976400	5615500			13986000	11173000	14394000			66501000	53555000	55882000
gi|116077331	1609799936	1736499968	1968899968			1360400000	1492000000	1558800000			1634899968	1320000000	1323500032
gi|116077333	10790000	10923000	10999000			71239000	83773000	93641000			66201000	60510000	62758000
gi|116077334	11845000	7746000	6994100			56714000	30032000	62755000			0	0	2911300
gi|116077335	2272000	3004000	1864800			3792500	4366000	1837400			2253600	0	2418100
gi|116077336	1018100	929800	968520			4447800	3698800	1993800			2438600	2839100	2950400
gi|116077337	245900000	223650000	214560000			156290000	151020000	175160000			28093000	35909000	40765000
gi|116077338	16122000	12874000	9952600			24099000	27257000	24385000			10357000	12846000	17551000
gi|116077339	361780000	478760000	493590016			401409984	364480000	423400000			790960000	813310016	542819968
gi|116077340	2251900	1757000	2376900			5034000	4526800	5200600			6445000	5315500	5079100
gi|116077341	727520	860300	0			8803200	7180200	6195900			1885300	2709400	2584100
gi|116077342	41734000	41343000	66014000			23290000	17703000	19518000			15278000	18626000	29916000
gi|116077343	967010	1997400	966480			7514500	6718900	7680800			0	0	3332600
gi|116077344	14908000256	13171000320	15223000064			13820000256	14618999808	18155999232			14819000320	13413000192	12256000000
gi|116077350	18060000	25929000	17770000			35415000	23523000	25876000			22035000	23506000	28914000
gi|116077352	24922000	43217000	33135000			50944000	65450000	40672000			39726000	15287000	26295000
gi|116077353	471600000	340369984	524440000			179680000	220070000	294329984			149060000	138910000	142770000
gi|116077356	631980032	775750016	684390016			1887699968	2386500096	2159000064			1635900032	1583000064	2078899968
gi|116077359	660200000	169200000	573209984			-	-	-			-	-	-
gi|116077361	13393000	11179000	9478800			50098000	40630000	58465000			14796000	10577000	8048500
gi|116077365	91839000	112210000	85157000			197790000	232280000	173220000			129220000	168390000	119910000
gi|116077368	31715000	12528000	20232000			23804000	28370000	24442000			24765000	21172000	28596000
gi|116077372	9189800	5006900	5175800			28098000	27671000	26233000			8983700	9730200	9508300
gi|116077374	1763900032	1679399936	1130099968			2109100032	2056199936	4316599808			2348900096	1265799936	1308400000
gi|116077377	676500	0	0			3262900	2660100	2471800			2145300	3522000	0
gi|116077378	64210000	61981000	111660000			52185000	28811000	40445000			54730000	36425000	56821000
gi|116077379	10457000	11102000	18465000			29273000	32800000	35866000			22840000	20625000	25600000
gi|116077380	13110000	18831000	16113000			17230000	10730000	11585000			1401400	2331300	3192000
gi|116077384	4657700	3407200	3843900			8255100	8428800	7060300			0	651950	740600
gi|116077385	6711300	6155200	13063000			5251300	4672000	4631400			8588900	8188000	9376600
gi|116077386	27431000	23139000	22393000			61834000	48378000	40007000			36861000	38977000	51864000
gi|116077387	3042500	2344700	3492800			9957700	8808400	8724200			7687500	8189800	7314400
gi|116077391	44163000	49990000	50014000			171690000	171100000	263950000			74489000	88921000	60595000
gi|116077392	1955100	0	5659300			-	-	-			-	-	-
gi|116077393	38137000	39981000	33786000			97689000	91583000	63493000			25713000	27322000	24141000
gi|116077394	0	0	3825600			-	-	-			-	-	-
gi|116077395	157540000	154760000	172460000			143100000	167690000	196720000			53762000	40942000	33155000
gi|116077398	2142500	1656000	2085900			7543800	6161900	4998000			3053500	2801500	4062200
gi|116077401	454689984	519609984	349680000			1228199936	1241699968	1383200000			1118300032	1231600000	1173699968
gi|116077402	14118000	15639000	11529000			80212000	56483000	61630000			12381000	18862000	11515000
gi|116077405	16709000	12782000	11484000			18578000	14752000	12387000			13895000	12284000	11041000
gi|116077407	3309500	2333500	1287000			8307100	7815200	3408800			4370700	5321600	5620200
gi|116077408	38263000	40357000	70459000			127420000	167650000	165840000			230980000	227400000	192300000
gi|116077409	6760000	7440900	6506400			11824000	11502000	9674700			3783900	3857100	5075000
gi|116077413	8717200	9128400	11637000			25477000	18092000	22267000			8956500	16190000	11848000
gi|116077414	11830000	9855900	9248900			8609100	7904700	7942900			0	5402000	6020900
gi|116077415	0	259470	0			-	-	-			0	0	405280
gi|116077417	96152000	112870000	92834000			402369984	477230016	468209984			99976000	86960000	94453000
gi|116077418	1356600	1648000	1044100			2360500	2067900	1961300			0	0	193350
gi|116077419	89418000	97021000	113790000			163990000	145520000	202980000			25887000	83925000	87098000
gi|116077420	3032100	2767300	2490100			10995000	5982100	7166400			2842400	1700500	4996200
gi|116077421	9998100	11299000	11135000			50735000	46346000	47892000			28121000	23975000	24342000
gi|116077422	342710016	278430016	343169984			502860000	463950016	592430016			269460000	398900000	426300000
gi|116077424	15531000	21215000	14985000			36224000	25913000	20903000			17001000	11815000	12970000
gi|116077425	87090000	75920000	116290000			152430000	174990000	200930000			171550000	126260000	155150000
gi|116077426	1710800	2158900	1835000			4658500	3276300	2234400			2729200	2200100	2174900
gi|116077428	1277400	1134800	1605200			-	-	-			-	-	-
gi|116077430	140610000	210850000	154300000			137210000	212060000	186840000			373870016	151230000	463809984
gi|116077433	371920000	210750000	253120000			231130000	218150000	129550000			187950000	186320000	314700000
gi|116077434	0	0	1446500			2559300	3320000	3345000			1030800	1982900	1269200
gi|116077435	4240200	0	0			-	-	-			-	-	-
gi|116077436	4228500	4656100	5249500			13971000	13197000	7808400			3602000	2905700	2734300
gi|116077438	8795600	8477400	9097200			25105000	22076000	13685000			17252000	18793000	24765000
gi|116077442	38241000	36538000	40386000			77898000	71171000	92012000			85142000	71069000	68987000
gi|116077445	26735000	23189000	37443000			65326000	61376000	50778000			28421000	36249000	39186000
gi|116077446	1235900032	2062899968	2347300096			4597700096	5199499776	5870400000			3531899904	4447000064	3305499904
gi|116077448	39896000	35047000	54905000			37846000	36908000	37368000			5870100	17646000	19879000
gi|116077450	905840	1195900	1036100			4602700	3135100	4563100			0	813520	279020
gi|116077451	9928400	6542200	8673600			-	-	-			0	1407500	1317000
gi|116077453	1975100	2062400	1760700			5047700	4414800	3867600			3105900	2035500	2970800
gi|116077455	1767600000	1875100032	1853799936			1932499968	2079600000	1932700032			1981299968	1729799936	3133299968
gi|116077457	27410000	28141000	17125000			22707000	27866000	29386000			27004000	31637000	28410000
gi|116077459	205520	0	0			-	-	-			-	-	-
gi|116077461	13110000	18756000	13874000			35648000	36961000	31071000			27045000	30358000	20860000
gi|116077463	14526000	11643000	16200000			6939100	5928100	4913200			4094400	3813100	5499300
gi|116077464	13198000	18956000	15372000			47851000	40852000	33694000			6192000	16147000	12367000
gi|116077465	6569500	6312400	8427400			10398000	6615600	7682400			4119100	3100500	2866100
gi|116077467	6184800	5215200	6411000			2537200	2245700	1776300			1775900	1960600	2735300
gi|116077468	128260000	162230000	144320000			255280000	228260000	175190000			281200000	365630016	216900000
gi|116077469	57547000	62390000	57675000			171880000	193700000	160140000			83322000	80503000	90504000
gi|116077470	75999000	67321000	81057000			53742000	61907000	63559000			7451700	34483000	27488000
gi|116077471	6697400	9368000	10269000			7917700	6517200	6447400			2599800	2916300	4484300
gi|116077472	49169000	57776000	39500000			19239000	25354000	22942000			7952800	15062000	20377000
gi|116077479	73168000	78175000	75612000			129380000	150830000	180420000			39861000	39005000	42372000
gi|116077480	141420000	107630000	133510000			144430000	89120000	107770000			66686000	50248000	42542000
gi|116077483	0	2313900	0			-	-	-			-	-	-
gi|116077484	16686000	11277000	8330300			63689000	47198000	67261000			74700000	63589000	34222000
gi|116077485	74322000	93009000	102060000			105380000	107790000	149830000			74898000	77442000	81315000
gi|116077487	5542500	7930400	8805400			11889000	10200000	8567000			1853900	2504800	2081800
gi|116077488	831430016	842870016	878289984			423950016	500040000	675680000			349100000	659680000	672969984
gi|116077489	229640000	309969984	311340000			620060032	794190016	805430016			203750000	412820000	396420000
gi|116077491	4963400	3834000	4826700			62836000	49420000	48237000			19366000	19360000	18808000
gi|116077493	5168900096	5476100096	4061900032			3290899968	3432399872	4211200000			8816400384	8638400512	7437599744
gi|116077494	338529984	221900000	375289984			299880000	337020000	393160000			184400000	220460000	300180000
gi|116077495	9414400	10016000	8250500			42253000	69050000	124300000			45021000	29819000	21491000
gi|116077497	0	102220000	71616000			170190000	143140000	265280000			210510000	224470000	142060000
gi|116077498	97215000	104640000	96406000			80639000	120960000	116030000			29188000	41505000	42342000
gi|116077499	398600	0	0			1469000	5980700	2283400			332370	416340	0
gi|116077500	931460	858800	0			5102200	0	6825300			2293200	1686700	0
gi|116077501	1108800	1315100	1300100			942220	0	0			0	440780	0
gi|116077503	24439000	18344000	22096000			6469500	6346700	10542000			13485000	7527200	10317000
gi|116077504	4851000	5448000	6934100			4024900	4337700	4800700			1437300	377480	1394700
gi|116077505	170600000	89073000	141300000			342240000	430630016	253710000			186100000	259570000	210900000
gi|116077508	11466000	10351000	11876000			54409000	50249000	59764000			12380000	16670000	14068000
gi|116077509	120250000	78877000	113190000			115160000	96108000	106970000			63848000	36975000	65247000
gi|116077510	11549000	10252000	10509000			44354000	32398000	24562000			6559000	5635500	4945000
gi|116077513	1342500	0	1327900			5782400	5989800	3612600			1963400	1943900	3374400
gi|116077514	81771000	92378000	61421000			75517000	82923000	113330000			176440000	150490000	140030000
gi|116077515	84782000	74032000	70470000			63478000	43214000	50058000			122860000	113870000	116940000
gi|116077516	6057099776	6495499776	6125899776			9265200128	7396899840	12049000448			12707999744	17227999232	11315000320
gi|116077517	29382000	17056000	36221000			9327800	11791000	15522000			3805800	4801500	5615000
gi|116077518	271780000	312440000	364080000			520240000	672680000	774000000			436889984	336620000	433150016
gi|116077519	3249200	884560	1123300			-	-	-			-	-	-
gi|116077520	35767000	32171000	34915000			148920000	124860000	126180000			44793000	53719000	43853000
gi|116077522	174920000	210380000	233510000			577649984	696049984	695240000			275950016	408600000	263600000
gi|116077525	562500	401520	651210			757530	882700	0			0	1006700	900390
gi|116077526	5410400	0	2543300			17914000	10345000	13831000			5110100	5717900	0
gi|116077527	217470000	282720000	177820000			540430016	504510016	590329984			365640000	339440000	237420000
gi|116077528	108460000	109710000	106370000			70349000	109850000	96445000			145960000	131390000	118160000
gi|116077529	465900000	446769984	560060032			594860032	646520000	611750016			914489984	793809984	747600000
gi|116077531	430689984	312350016	377860000			1051299968	918860032	820240000			310430016	290520000	256050000
gi|116077532	1423300	1195300	2652000			2058800	2306900	2477900			4808000	3938400	6237900
gi|116077535	5933900	4246400	5329100			4385600	0	4375100			4158700	0	6777600
gi|116077536	4390700	5723500	8140400			2769300	5589900	3837500			3536300	4661200	4933200
gi|116077537	5780000	6743500	7517900			6939900	8264800	12446000			10678000	9931000	11506000
gi|116077541	2846400000	2732699904	3025999872			3269600000	3080900096	4221799936			2146300032	2606899968	2573400064
gi|116077542	86929000	77321000	71961000			27910000	27739000	32737000			17872000	11670000	10385000
gi|116077543	996940	1171000	1571100			0	1066000	0			815510	964660	1351000
gi|116077545	1495300	0	1209800			0	4961700	0			-	-	-
gi|116077548	423369984	224770000	389580000			77880000	133740000	117410000			375470016	308289984	352809984
gi|116077550	86258000	83735000	79573000			95129000	87927000	72210000			12237000	25249000	46029000
gi|116077551	184600000	189640000	216960000			288160000	345720000	310350016			103400000	86264000	91640000
gi|116077556	1889100	1967200	1773600			3604900	0	2625600			3563900	4641900	4841300
gi|116077560	51655000	44151000	36883000			131240000	121440000	117440000			136660000	134060000	150490000
gi|116077561	1858300	1959800	3424000			7631400	7096100	5510300			0	1368100	0
gi|116077564	5177100	9547400	9069900			7334700	8009300	6518600			-	-	-
gi|116077566	18777000	20333000	19159000			194460000	206140000	225190000			27993000	30668000	26148000
gi|116077567	58871000	70140000	60902000			99285000	122440000	115170000			10274000	20596000	21126000
gi|116077568	213810000	153500000	181390000			318700000	336820000	284649984			194300000	219010000	272329984
gi|116077569	2848000	4048000	2536500			22590000	17317000	19340000			2971600	0	3733300
gi|116077571	227640000	111960000	78504000			359809984	476880000	552499968			84174000	47659000	76927000
gi|116077572	87377000	97846000	73887000			150810000	120520000	121510000			103640000	92470000	96056000
gi|116077573	7411600	6407900	6204300			0	733420	0			6796800	12792000	5347300
gi|116077574	8617400	10644000	10050000			8221800	6472000	8579200			1419300	1033500	1102100
gi|116077575	362529984	337209984	396680000			856040000	700729984	749529984			746339968	745699968	438980000
gi|116077576	3126400	3476100	4450500			3390000	3859800	2914100			0	1647100	1474400
gi|116077578	1816000	1509400	1996700			-	-	-			-	-	-
gi|116077580	1016099968	722729984	770320000			436100000	621809984	575920000			564190016	465089984	437550016
gi|116077581	457100000	515110016	523420000			851139968	907939968	959059968			333849984	544689984	442700000
gi|116077587	71173000	72923000	108750000			190210000	225050000	235070000			142410000	77420000	206150000
gi|116077591	38679000	40909000	33560000			101020000	132000000	83681000			29528000	67899000	50881000
gi|116077592	1754600	2933100	3128000			10763000	6763300	8701000			1892400	1840300	1664700
gi|116077593	13089000	9039300	8914000			34271000	27004000	33882000			8110800	13680000	9536900
gi|116077602	1384300032	1511800064	1847699968			2716400128	2780100096	1456099968			3092100096	3699599872	3696699904
gi|116077604	657409984	628009984	733800000			608259968	665529984	1057500032			334049984	464660000	446729984
gi|116077605	594090	513190	840180			0	0	818640			0	320080	303790
gi|116077606	683600	973170	1296400			-	-	-			-	-	-
gi|116077607	3576400	2750200	4483500			4064800	3327200	3329000			0	0	990810
gi|116077610	23592000	11736000	10828000			28987000	21062000	7822800			1470400	2085800	1253800
gi|116077611	40629000	41127000	54020000			63154000	41868000	42546000			17101000	25146000	14945000
gi|116077613	9399200	13037000	18660000			20802000	18809000	20110000			16926000	15008000	16813000
gi|116077617	0	657680	636240			1762400	1875600	2264600			978890	1173800	899000
gi|116077618	46889000	33540000	48946000			29122000	42149000	50355000			64075000	30324000	41574000
gi|116077619	5146600	6535200	4925100			2364000	3111100	3784800			4303700	4035300	4740100
gi|116077620	0	0	885370			2555400	0	967530			-	-	-
gi|116077621	157610000	212470000	156580000			143410000	122990000	131000000			134580000	175830000	128610000
gi|116077623	4720000	2851900	8964500			-	-	-			0	629810	0
gi|116077624	322400000	306900000	262700000			388150016	386310016	391889984			101400000	122700000	119840000
gi|116077630	2779200	0	3236700			-	-	-			-	-	-
gi|116077633	2635100	3286800	4016400			5519900	6663000	6189900			0	1508400	2217500
gi|116077635	17414000	21294000	23238000			5564000	5997700	6750600			9269900	7736000	11103000
gi|116077638	8187000	9768700	12258000			50688000	40796000	34290000			4233300	8094200	5420000
gi|116077639	11939000	8163500	7653800			14161000	12495000	11660000			0	2373500	3486700
gi|116077640	847300	920470	1035200			1220600	1117900	977550			961830	1670100	1386400
gi|116077641	106450000	113940000	105250000			238450000	276030016	220890000			127510000	63831000	210860000
gi|116077645	450150016	279750016	502140000			257580000	342049984	449129984			212870000	294940000	183890000
gi|116077646	5023100	6833900	6059800			5792300	5144700	4768900			13334000	17047000	15841000
gi|116077648	114120000	107960000	106910000			243780000	400750016	221200000			4946200	8189200	6889700
gi|116077649	4423800	3991400	2748100			13388000	15706000	13358000			7500900	6320100	6244300
gi|116077650	9014800	13435000	8922100			12613000	10527000	14227000			12226000	3345300	6849700
gi|116077651	103070000	95368000	112940000			254160000	342750016	457110016			85976000	102160000	94221000
gi|116077652	4694700	4521600	5169700			4992300	4000900	2926400			0	451350	547410
gi|116077653	393820	591600	353390			6239900	3580500	5229200			1074500	720600	904140
gi|116077654	0	0	8283200			174840000	175760000	132460000			0	50002000	54443000
gi|116077656	335990	352150	493450			-	-	-			522470	521940	650260
gi|116077658	4254200	5120900	5292900			7960400	7281000	6362300			1893300	2544000	2955700
gi|116077659	193600000	165410000	115630000			571710016	621680000	857710016			515449984	363740000	407620000
gi|116077660	34608000	39500000	36899000			143330000	125530000	150870000			70662000	51012000	74532000
gi|116077661	30432000	28366000	35324000			66242000	70455000	88590000			13569000	13094000	12108000
gi|116077663	36724000	43162000	50661000			93878000	80129000	49750000			33626000	31578000	31072000
gi|116077665	457350	608920	469980			8033700	9993100	7139200			4403800	4477100	4341300
gi|116077666	320520000	321760000	297240000			425449984	327990016	339270016			121370000	216720000	246970000
gi|116077667	2132200	2705100	2841700			2908100	2237700	2369000			710800	678390	710740
gi|116077669	5961200	5712100	5518800			8747800	6848000	11054000			2616700	8553800	3672400
gi|116077671	128680000	114820000	206620000			135290000	121360000	173770000			141140000	163980000	125440000
gi|116077672	4559300	3407300	3136000			8234100	8275400	8558400			0	1078800	876580
gi|116077673	35955000	34879000	28084000			125000000	133100000	166160000			130040000	112770000	112210000
gi|116077674	1280199936	1593299968	1596899968			521449984	447049984	502809984			840249984	725910016	776200000
gi|116077675	27885000	33362000	36912000			45998000	40831000	31993000			21833000	53060000	33572000
gi|116077677	39868000	43579000	36418000			42170000	37603000	39713000			14385000	9941400	9052300
gi|116077678	2534599936	2025100032	2168699904			2908199936	3790500096	3489799936			3416699904	3380199936	3067000064
gi|116077679	37671000	50556000	45380000			318460000	327380000	342940000			25399000	55522000	46580000
gi|116077680	71162000	73889000	79222000			65915000	46200000	46832000			47975000	41379000	52077000
gi|116077681	3100499968	2607899904	1607299968			748000000	1033400000	2732100096			3752800000	2821100032	3582500096
gi|116077682	25032000	29471000	39310000			36838000	37858000	31203000			5726900	8073700	8183300
gi|116077683	131690000	186640000	107000000			82201000	62824000	62725000			4545900	16109000	21681000
gi|116077684	12556000	8872600	8480300			8179200	8729500	7530800			10078000	6412200	12363000
gi|116077685	80539000	65643000	65041000			160320000	132120000	128580000			101810000	110260000	151190000
gi|116077689	7151300	7661100	10388000			-	-	-			3014700	4716900	0
gi|116077690	0	8039000	9594500			-	-	-			-	-	-
gi|116077691	5348300	4979700	4919000			2963300	2657900	2324600			0	683170	1104900
gi|116077693	13548000	11873000	15468000			19487000	12665000	20195000			18478000	12758000	13416000
gi|116077694	1452700	1295900	1037300			2938900	2029000	2068700			0	431610	0
gi|116077697	523810	0	0			1162900	1346500	1597900			278860	176340	0
gi|116077698	41538000	45618000	44019000			43893000	44746000	53242000			47138000	45867000	41815000
gi|116077700	25387000	20773000	17618000			22401000	19422000	21787000			788390	11781000	10094000
gi|116077701	7981200	7003800	6420700			48266000	31187000	37484000			10804000	6965800	5337600
gi|116077702	201340000	250220000	260450000			182370000	190110000	249330000			53080000	63276000	68155000
gi|116077703	28427000	22937000	18213000			40860000	40187000	38269000			10397000	14230000	20087000
gi|116077704	2316300032	2319800064	2794200064			1864700032	1428899968	1745500032			777800000	957320000	766140032
gi|116077705	150820000	165990000	185590000			52210000	44401000	53574000			141410000	152200000	115800000
gi|116077706	26379000	33203000	35001000			74767000	137480000	137800000			9650500	9219200	9768500
gi|116077707	48867000	77091000	69303000			1447100	0	1236200			12998000	13974000	15469000
gi|116077708	27513000	49143000	16789000			4601800	3459000	5539300			3495100	10361000	6251900
gi|116077709	814819968	676240000	398729984			794480000	591180032	926419968			1694599936	1460000000	1307600000
gi|116077710	0	1247300	0			5114800	3726100	4354000			2072700	0	0
gi|116077713	1803800	1277200	1328000			1010600	593280	1072700			325060	0	0
gi|116077714	22577000	17991000	17926000			126890000	125120000	104950000			32434000	36597000	26777000
gi|116077715	1931200	2697200	2811200			7310400	5434000	5417000			0	16819000	14365000
gi|116077716	6484400	6942800	5434600			6037300	2746400	3608400			6336900	3401500	3627600
gi|116077717	12113000	11463000	12488000			5556400	5976700	5702600			14787000	11850000	10911000
gi|116077718	92432000	92132000	82323000			109460000	98580000	92299000			82154000	102290000	104680000
gi|116077719	2981400	4610400	2388200			3020900	2345800	2744300			3098700	3582700	3011800
gi|116077725;gi|116076381	725360000	604350016	753790016			924350016	1036400000	1110099968			650969984	846249984	855689984
gi|116077726	155360000	136420000	173270000			496110016	670150016	820430016			720019968	545379968	593640000
gi|116077727	2770700032	2736100096	2695000064			2672699904	1820000000	2181400064			4883100160	4202800128	2067200000
gi|116077729	88170000	88752000	73949000			135860000	118890000	113980000			58247000	55786000	63664000
gi|116077730	9391000	8697700	11468000			18958000	18693000	19190000			2512900	2353600	1782200
gi|116077731	1384700032	1542899968	1252499968			813609984	877500032	1130000000			3491000064	3015399936	2464399872
gi|116077732	21472000	23019000	23453000			27138000	25278000	30943000			22570000	22832000	24067000
gi|116077733	74049000	86524000	55323000			126390000	162230000	83353000			64136000	71450000	104680000
gi|116077734	0	297810	1387300			0	7968400	775580			0	571490	0
gi|116077735	17672000	15132000	19369000			4992600	4620500	5017800			3682800	5975800	6301300
gi|116077737	0	0	930600			-	-	-			-	-	-
gi|116077738	394249984	387680000	636400000			357209984	320460000	334009984			24733000	90473000	72177000
gi|116077739	0	0	749680			-	-	-			-	-	-
gi|116077740	2592200	2723300	3128300			17138000	18183000	24362000			9686500	0	4780800
gi|116077743	97678000	91143000	85481000			75378000	55957000	67775000			53121000	62436000	77163000
gi|116077744	94394000	82902000	69966000			427700000	339750016	406360000			254030000	228430000	247990000
gi|116077747	341890	333590	735260			2477200	2170600	1599600			0	620760	0
gi|116077748	92170000	102340000	120390000			250530000	273280000	230650000			63885000	90754000	91906000
gi|116077751	370500	595760	0			-	-	-			-	-	-
gi|116077752	15968000	18730000	18845000			58627000	33717000	27341000			5442000	5450300	2175400
gi|116077753	1651500	1476800	1804000			2584700	2335200	2678000			1873600	1060300	2468100
gi|116077754	536089984	570380032	634099968			333790016	275840000	376470016			86059000	135270000	134740000
gi|116077756	1426400	1838500	1585000			2759500	0	2070100			0	395660	0
gi|116077757	2424500	2566600	2498600			2708100	1970100	2392000			5771400	3963000	2871000
gi|116077758	28265000	29514000	35364000			29899000	32624000	35482000			-	-	-
gi|116077760	0	201840	0			-	-	-			-	-	-
gi|116077763	376410	0	336480			-	-	-			0	1748900	2415800
gi|116077764	317140000	345550016	395340000			359620000	354369984	382289984			301950016	309150016	357809984
gi|116077765	12298000	10801000	11938000			23738000	19154000	16403000			2339200	5860800	6466500
gi|116077767	0	0	794700			11696000	9804700	8141800			1128300	1019400	1407500
gi|116077770	0	0	304360			-	-	-			-	-	-
gi|116077772	1940499968	1982499968	2182700032			2959500032	2922200064	2235800064			3371399936	3375000064	3709499904
gi|116077773	1650599936	1319299968	1461100032			584700032	419489984	382350016			854470016	890190016	762969984
gi|116077775	11346000	13531000	16788000			31471000	26503000	25259000			26980000	27484000	26594000
gi|116077776	46306000	47003000	44184000			50762000	45946000	44061000			0	10204000	9743300
gi|116077777	50390000	45468000	35241000			195580000	168260000	171810000			5110800	11354000	12090000
gi|116077778	3468100	4900500	6419100			2410800	1865800	1692200			953000	1507800	2783700
gi|116077780	4703700	4129300	4386900			4245700	3251000	3424800			0	332260	307900
gi|116077781	246920000	255620000	219000000			233160000	184030000	184100000			180070000	153110000	164850000
gi|116077784	1592000000	1421299968	1304400000			3652300032	3460400128	3007600128			2361799936	3067500032	2018499968
gi|116077785	328790016	452520000	674600000			514369984	505160000	567550016			770080000	689779968	700409984
gi|116077789	235170	0	708070			0	149210	0			78694	0	0
gi|116077792	15502000	16655000	12325000			64732000	70915000	96960000			90372000	82516000	68161000
gi|116077793	18058000	15081000	15899000			-	-	-			-	-	-
gi|116077796	5194500	6534400	7006600			20701000	16206000	16313000			7673300	7670600	10359000
gi|116077798	3024800	2773500	2775800			326710	0	1285200			0	0	394940
gi|158705929	145670000	150340000	233890000			112140000	95206000	36903000			1898200	76067000	18292000
gi|172046079	175670000	210740000	186490000			281320000	348100000	298209984			285569984	577379968	355889984
gi|187611312	310660000	244570000	251810000			254550000	204370000	222730000			211300000	251420000	279480000
gi|215274946	6241900	7869100	6446200			9007200	8420400	7062400			4353300	8314700	6420000
gi|251764802	48797000	57648000	43857000			84719000	54043000	78999000			113970000	101910000	59705000
gi|2911484	2419100	2237900	1120300			8289800	10643000	9339300			-	-	-
gi|5030426	131600000	133250000	147630000			197020000	168390000	160460000			137120000	150260000	158880000
gi|8163644	2825000	2894300	2415800			1645700	2684400	2518300			3857900	5527400	3887800
gi|116076126	-	-	-			10547000	10413000	10550000			5866400	1825500	2806300
gi|116076153	-	-	-			381490	364520	0			0	0	52527
gi|116076166	-	-	-			1760100	1222300	1455000			194560	0	0
gi|116076168	-	-	-			5100500	4754100	3775800			147370	0	229550
gi|116076263	-	-	-			10682000	23649000	63754000			25072000	21319000	27376000
gi|116076298	-	-	-			5468100	6080900	6965700			0	3764300	0
gi|116076337	-	-	-			0	9540400	0			2206700	0	0
gi|116076463	-	-	-			-	-	-			0	0	1599900
gi|116076475	-	-	-			-	-	-			24837000	28398000	21630000
gi|116076524	-	-	-			812090	882850	1131400			0	0	214010
gi|116076622	-	-	-			10627000	11128000	12161000			0	0	5339400
gi|116076639	-	-	-			-	-	-			747689984	683480000	747939968
gi|116076679	-	-	-			1500900	1046300	1625800			2859200	0	1799500
gi|116076742	-	-	-			10179000	12746000	25620000			21420000	17450000	7581100
gi|116076823	-	-	-			-	-	-			0	5098200	0
gi|116076876	-	-	-			580120	0	0			62718	0	0
gi|116076903	-	-	-			1449900	1078900	1815000			842250	0	0
gi|116076996	-	-	-			6689100	5450300	3310500			1265500	0	1893200
gi|116077033	-	-	-			3558300	2512800	0			0	0	459220
gi|116077122	-	-	-			717720	683830	1001900			0	401840	0
gi|116077127	-	-	-			3109600	3965800	0			1483700	0	1503200
gi|116077202	-	-	-			0	0	636730			0	0	58377
gi|116077256	-	-	-			-	-	-			0	1022200	2019100
gi|116077300	-	-	-			-	-	-			0	298590	0
gi|116077309	-	-	-			0	1305500	0			0	1943200	0
gi|116077366	-	-	-			588530	1002800	940320			284590	0	524700
gi|116077403	-	-	-			733730	0	563350			0	0	530490
gi|116077412	-	-	-			1731600	1625600	1994600			0	142710	0
gi|116077431	-	-	-			305280	249390	364620			280020	223410	0
gi|116077475	-	-	-			51244000	46077000	26755000			2930700	4893400	2727700
gi|116077530	-	-	-			-	-	-			0	417600	0
gi|116077590	-	-	-			2528100	2202400	2097300			210540	0	0
gi|116077628	-	-	-			0	2294700	4187500			0	0	520370
gi|116077636	-	-	-			-	-	-			3185200	3492100	4794700
gi|116077724	-	-	-			224930	0	253940			0	57081	0
gi|116077741	-	-	-			0	0	122870			320640	0	0
gi|116075939	-	-	-			0	0	4131200			-	-	-
gi|116075965	-	-	-			0	0	303020			-	-	-
gi|116076006	-	-	-			0	0	982460			-	-	-
gi|116076050	-	-	-			1077700	0	1506100			-	-	-
gi|116076080	-	-	-			0	203500	0			-	-	-
gi|116076150	-	-	-			1434100	0	0			-	-	-
gi|116076174	-	-	-			467760	394500	660950			-	-	-
gi|116076205	-	-	-			0	360460	0			-	-	-
gi|116076209	-	-	-			169020	0	0			-	-	-
gi|116076221	-	-	-			0	239230	0			-	-	-
gi|116076349	-	-	-			713490	0	0			-	-	-
gi|116076379	-	-	-			0	0	8782000			-	-	-
gi|116076403	-	-	-			0	3722800	3150000			-	-	-
gi|116076526	-	-	-			201060	0	201380			-	-	-
gi|116076535	-	-	-			639370	0	0			-	-	-
gi|116076552	-	-	-			2924400	3287900	0			-	-	-
gi|116076569	-	-	-			7939600	10421000	6647300			-	-	-
gi|116076582	-	-	-			11948000	5249000	7714900			-	-	-
gi|116076680	-	-	-			7290400	9174800	10107000			-	-	-
gi|116076701	-	-	-			13843000	0	0			-	-	-
gi|116076728	-	-	-			713330	0	589250			-	-	-
gi|116076787	-	-	-			2451500	1884600	1907600			-	-	-
gi|116076806	-	-	-			2736800	2328400	1830600			-	-	-
gi|116076817	-	-	-			111030	0	0			-	-	-
gi|116076821	-	-	-			0	0	16190			-	-	-
gi|116076838	-	-	-			643200	380780	0			-	-	-
gi|116076839	-	-	-			1889600	1961900	0			-	-	-
gi|116076840	-	-	-			0	0	159710			-	-	-
gi|116076850	-	-	-			0	2279700	1959600			-	-	-
gi|116076852	-	-	-			773400	0	0			-	-	-
gi|116076937	-	-	-			1854800	0	2914500			-	-	-
gi|116076946	-	-	-			10554000	6338300	0			-	-	-
gi|116076947	-	-	-			1325100	1623100	2806000			-	-	-
gi|116076959	-	-	-			6082300	7440900	4809300			-	-	-
gi|116076995	-	-	-			0	552290	0			-	-	-
gi|116077002	-	-	-			1184400	0	0			-	-	-
gi|116077076	-	-	-			265240	542900	0			-	-	-
gi|116077152	-	-	-			936010	0	0			-	-	-
gi|116077187	-	-	-			18133000	18571000	25100000			-	-	-
gi|116077194	-	-	-			2286600	2050000	0			-	-	-
gi|116077308	-	-	-			3851000	6195300	0			-	-	-
gi|116077332	-	-	-			0	0	90972			-	-	-
gi|116077358	-	-	-			0	949010	623700			-	-	-
gi|116077364	-	-	-			5541100	4566400	3103100			-	-	-
gi|116077373	-	-	-			6710100	6104500	5964000			-	-	-
gi|116077389	-	-	-			0	0	1774200			-	-	-
gi|116077397	-	-	-			2789800	2679800	3467200			-	-	-
gi|116077437	-	-	-			22912000	8205300	9291400			-	-	-
gi|116077439	-	-	-			637220	0	0			-	-	-
gi|116077440	-	-	-			3148300	2695500	4608900			-	-	-
gi|116077441	-	-	-			3168500	3080200	2590800			-	-	-
gi|116077502	-	-	-			1032800	0	0			-	-	-
gi|116077582	-	-	-			1327900	1334100	1429800			-	-	-
gi|116077595	-	-	-			0	0	302790			-	-	-
gi|116077637	-	-	-			570210	288020	401140			-	-	-
gi|116077642	-	-	-			0	200010	210210			-	-	-
gi|116077670	-	-	-			1062200	755390	903600			-	-	-
gi|116077686	-	-	-			0	372990	0			-	-	-
gi|116077692	-	-	-			1249300	1021200	1025700			-	-	-
gi|116077769	-	-	-			583710	0	0			-	-	-
gi|116077795	-	-	-			0	0	714790			-	-	-

## Sheet: S3_Median_normalization
Identifier	LFQ intensity WT_BR1	LFQ intensity WT_BR2	LFQ intensity WT_BR3		Median	Median_normalised_LFQ intensity WT_BR1	Median_normalised_LFQ intensity WT_BR2	Median_normalised_LFQ intensity WT_BR3	LFQ intensity ΔphpP_BR1	LFQ intensity ΔphpP_BR2	LFQ intensity ΔphpP_BR3		Median	Median_normalised_LFQ intensity ΔphpP_BR1	Median_normalised_LFQ intensity ΔphpP_BR2	Median_normalised_LFQ intensity ΔphpP_BR3	LFQ intensity ΔstkP_BR1	LFQ intensity ΔstkP_BR2	LFQ intensity ΔstkP_BR3		Median	Median_normalised_LFQ intensity ΔstkP_BR1	Median_normalised_LFQ intensity ΔstkP_BR2	Median_normalised_LFQ intensity ΔstkP_BR3
gi|116075886	143100000	150400000	121650000	LFQ intensity WT_BR1	20224500	7.07558	7.61249	6.04487	302329984	282670016	245120000	LFQ intensity ΔphpP_BR1	34271000	8.82174	9.29683	8.32694	130110000	118440000	59015000	LFQ intensity ΔstkP_BR1	17001000	7.65308	6.11777	2.86731
gi|116075887	4261700	4018000	3316100	LFQ intensity WT_BR2	19757000	0.21072	0.203371	0.164779	15189000	17397000	13624000	LFQ intensity ΔphpP_BR2	30405000	0.443203	0.572176	0.462819	5594000	6806600	6681500	LFQ intensity ΔstkP_BR2	19360000	0.329039	0.351581	0.324628
gi|116075888	59201000	58642000	69029000	LFQ intensity WT_BR3	20124500	2.92719	2.96816	3.4301	60767000	55426000	67304000	LFQ intensity ΔphpP_BR3	29437000	1.77313	1.82292	2.28637	60459000	77806000	80663000	LFQ intensity ΔstkP_BR3	20582000	3.5562	4.0189	3.9191
gi|116075889	1286400	1205200	1539500			0.063606	0.0610012	0.0764988	-	-	-			-	-	-	-	-	-			-	-	-
gi|116075890	0	732090	0			0	0.0370547	0	24587000	9506900	16155000			0.717429	0.312676	0.548799	0	0	596770			0	0	0.0289948
gi|116075891	113410000	116320000	122700000			5.60756	5.88753	6.09705	273060000	333470016	420529984			7.96767	10.9676	14.2858	365910016	240370000	242360000			21.5229	12.4158	11.7753
gi|116075892	49314000	173440000	151560000			2.43833	8.77866	7.53112	225360000	181600000	309230016			6.57582	5.9727	10.5048	-	-	-			-	-	-
gi|116075894	9358200	7996300	10447000			0.462716	0.404732	0.519118	17496000	14840000	9296400			0.510519	0.488078	0.315807	0	0	339920			0	0	0.0165154
gi|116075895	1653200	1061300	1372000			0.0817424	0.0537177	0.0681756	-	-	-			-	-	-	1426700	1320400	2624500			0.0839186	0.0682025	0.127514
gi|116075897	44804000	54822000	47662000			2.21533	2.77481	2.36836	71866000	77359000	86013000			2.09699	2.54429	2.92193	57862000	94629000	32296000			3.40345	4.88786	1.56914
gi|116075902	248950	0	288110			0.0123093	0	0.0143164	1442000	1383700	1142000			0.0420764	0.045509	0.0387947	0	291200	324410			0	0.0150413	0.0157618
gi|116075903	105600	120600	91997			0.00522139	0.00610417	0.00457139	336460	221380	453420			0.00981763	0.00728104	0.0154031	0	0	77421			0	0	0.00376159
gi|116075904	16946000	22273000	17556000			0.837895	1.12735	0.872369	15124000	19630000	10620000			0.441306	0.645617	0.36077	6231400	4304200	4630400			0.366531	0.222324	0.224973
gi|116075906	53580000	52812000	32485000			2.64926	2.67308	1.6142	48042000	46523000	43361000			1.40183	1.53011	1.47301	19459000	10551000	20101000			1.14458	0.54499	0.97663
gi|116075907	47534000	28588000	20533000			2.35032	1.44698	1.0203	46819000	41320000	39170000			1.36614	1.35899	1.33064	45278000	74814000	45902000			2.66326	3.86436	2.2302
gi|116075908	6657800	9081100	7452200			0.329195	0.45964	0.370305	7498400	7449900	7848800			0.218797	0.245022	0.26663	10002000	11710000	9368500			0.588318	0.604855	0.455179
gi|116075910	8440100	7885100	6193300			0.417321	0.399104	0.307749	10020000	10475000	8596100			0.292375	0.344516	0.292017	8146500	10347000	9699100			0.479178	0.534452	0.471242
gi|116075911	356150016	152250000	267320000			17.6098	7.70613	13.2833	33662000	34138000	21484000			0.98223	1.12278	0.72983	40347000	63017000	87882000			2.37321	3.25501	4.26985
gi|116075912	0	0	1101200			0	0	0.0547194	-	-	-			-	-	-	-	-	-			-	-	-
gi|116075913	4592100	3134300	3577200			0.227056	0.158643	0.177753	6933800	6393000	6303000			0.202323	0.210261	0.214118	3406000	4529700	1822000			0.200341	0.233972	0.088524
gi|116075914	100130000	77575000	77916000			4.95093	3.92646	3.8717	70192000	57715000	50097000			2.04815	1.89821	1.70184	59520000	53459000	57386000			3.50097	2.76131	2.78816
gi|116075915	23707000	24979000	22560000			1.17219	1.26431	1.12102	35995000	25071000	29437000			1.0503	0.824568	1	81198000	76365000	63620000			4.77607	3.94447	3.09105
gi|116075917	10828000	14802000	15391000			0.53539	0.749203	0.764789	6060100	7446400	8712500			0.176829	0.244907	0.295971	26498000	28634000	27920000			1.55861	1.47903	1.35653
gi|116075921	70247000	42291000	30949000			3.47336	2.14056	1.53788	112570000	88574000	76926000			3.2847	2.91314	2.61324	228550000	192670000	77486000			13.4433	9.95196	3.76475
gi|116075922	34903000	35684000	31577000			1.72578	1.80614	1.56908	82290000	71287000	76827000			2.40116	2.34458	2.60988	16531000	15632000	13141000			0.972355	0.807438	0.638471
gi|116075923	5167300	6165700	5348500			0.255497	0.312077	0.265771	7640300	6047800	6487000			0.222938	0.198908	0.220369	9611100	9458600	15152000			0.565326	0.488564	0.736177
gi|116075926	2504500	1724100	1939400			0.123835	0.0872653	0.0963701	6560000	4349300	3679500			0.191415	0.143046	0.124996	20624000	40250000	0			1.21311	2.07903	0
gi|116075927	0	0	3262500			0	0	0.162116	887930	0	763930			0.0259091	0	0.0259514	-	-	-			-	-	-
gi|116075929	6826700	6035500	5890700			0.337546	0.305487	0.292713	13789000	9332800	9536100			0.402352	0.30695	0.323949	0	3253900	4144800			0	0.168073	0.20138
gi|116075931	2783600128	2144600064	2303500032			137.635	108.549	114.462	3780000000	3640699904	3132999936			110.297	119.74	106.431	3111000064	3182200064	2537900032			182.989	164.37	123.307
gi|116075932	20244000768	17465999360	17220999168			1000.96	884.041	855.723	16620000256	15160999936	20370999296			484.958	498.635	692.02	13941000192	15009000448	15162999808			820.011	775.258	736.712
gi|116075934	565100032	725059968	628990016			27.9414	36.6989	31.2549	2705999872	5218800128	4414499840			78.9589	171.643	149.964	1057900032	628849984	1299100032			62.2258	32.4819	63.1183
gi|116075936	77030000	74845000	86337000			3.80875	3.78828	4.29014	92350000	86112000	63559000			2.6947	2.83217	2.15915	81068000	82183000	98344000			4.76843	4.24499	4.77816
gi|116075937	0	14850	0			0	0.000751632	0	0	365820	256570			0	0.0120316	0.0087159	-	-	-			-	-	-
gi|116075938	87924000	94055000	76859000			4.3474	4.76059	3.81918	118270000	144660000	189850000			3.45102	4.75777	6.44937	142270000	172430000	142010000			8.36833	8.90651	6.89972
gi|116075940	80300000	68735000	65084000			3.97043	3.47902	3.23407	362340000	266630000	214840000			10.5728	8.76928	7.2983	88784000	76188000	93078000			5.22228	3.93533	4.5223
gi|116075941	5298400	5553200	6756700			0.261979	0.281075	0.335745	32354000	19438000	24862000			0.944063	0.639303	0.844583	20468000	13101000	12732000			1.20393	0.676705	0.618599
gi|116075942	3645900032	3199000064	4538999808			180.271	161.917	225.546	4400699904	4214299904	5271900160			128.409	138.605	179.091	5996899840	7186899968	7198000128			352.738	371.224	349.723
gi|116075944	170570000	140630000	175930000			8.43383	7.11798	8.74208	157190000	213320000	205720000			4.58668	7.01595	6.98848	177540000	233890000	235400000			10.4429	12.0811	11.4372
gi|116075945	17273000	25797000	20017000			0.854063	1.30571	0.994658	78522000	73349000	58169000			2.29121	2.4124	1.97605	26184000	44024000	21208000			1.54014	2.27397	1.03041
gi|116075946	28489000	35691000	38102000			1.40864	1.8065	1.89331	76229000	140450000	76830000			2.2243	4.61931	2.60998	28851000	44412000	32196000			1.69702	2.29401	1.56428
gi|116075947	0	0	6149000			0	0	0.305548	0	0	2104100			0	0	0.0714781	-	-	-			-	-	-
gi|116075949	1022900	718890	1447200			0.0505773	0.0363866	0.0719123	890610	883020	793150			0.0259873	0.0290419	0.026944	0	324290	334780			0	0.0167505	0.0162657
gi|116075951	5558800	4342100	5624900			0.274855	0.219775	0.279505	3460300	6119600	3999900			0.100969	0.20127	0.13588	0	870800	1351500			0	0.0449793	0.0656642
gi|116075952	495190016	605580032	400409984			24.4847	30.6514	19.8966	502720000	441500000	440780000			14.669	14.5206	14.9737	341430016	244320000	169240000			20.0829	12.6198	8.22272
gi|116075954	0	867820	0			0	0.0439247	0	2082800	2084000	0			0.0607744	0.0685414	0	2384900	2790300	0			0.14028	0.144127	0
gi|116075955	9170200	11270000	12046000			0.45342	0.570431	0.598574	5209200	5444100	6366400			0.152	0.179053	0.216272	8839300	10635000	10483000			0.519928	0.549329	0.509329
gi|116075958	1352800000	1348899968	1315500032			66.8892	68.2745	65.3681	1619900032	2055200000	1588099968			47.2674	67.5941	53.9491	1139900032	942870016	1393100032			67.049	48.702	67.6854
gi|116075959	31194000	37940000	38148000			1.54239	1.92033	1.8956	116040000	110220000	127070000			3.38595	3.62506	4.31668	50978000	50711000	60693000			2.99853	2.61937	2.94884
gi|116075960	60203000	50587000	60005000			2.97674	2.56046	2.98169	100490000	94638000	224230000			2.93222	3.11258	7.61728	46466000	55529000	40658000			2.73313	2.86823	1.97542
gi|116075961	2189700096	1730200064	1754099968			108.27	87.574	87.1624	1544600064	1888899968	1453200000			45.0702	62.1246	49.3664	3491099904	3294200064	3394099968			205.347	170.155	164.906
gi|116075962	0	259180	0			0	0.0131184	0	-	-	-			-	-	-	-	-	-			-	-	-
gi|116075963	20523000	22046000	27774000			1.01476	1.11586	1.38011	7375700	8826900	11067000			0.215217	0.290311	0.375955	1186200	9253100	9024400			0.0697724	0.477949	0.438461
gi|116075964	10134000	6916600	8800600			0.501075	0.350084	0.437308	22892000	24080000	20316000			0.66797	0.791975	0.690152	38392000	38249000	19182000			2.25822	1.97567	0.931979
gi|116075966	51467000	40442000	28251000			2.54478	2.04697	1.40381	85567000	75496000	29157000			2.49678	2.48301	0.990488	56168000	60763000	53961000			3.30381	3.13858	2.62176
gi|116075969	28675000	25147000	32275000			1.41783	1.27281	1.60377	14019000	19456000	16545000			0.409063	0.639895	0.562048	15765000	11316000	17817000			0.927298	0.584504	0.865659
gi|116075971	6398100	5426800	7712600			0.316354	0.274677	0.383244	2737500	3617900	2769400			0.079878	0.11899	0.0940789	15790000	19768000	21874000			0.928769	1.02107	1.06277
gi|116075972	2188400	2386300	4834900			0.108205	0.120783	0.240249	296430	462480	434270			0.00864959	0.0152107	0.0147525	719520	728690	481170			0.0423222	0.0376389	0.0233782
gi|116075974	23616000	22915000	20907000			1.16769	1.15984	1.03888	4973800	6721200	5635100			0.145131	0.221056	0.191429	2658300	5541700	4754900			0.156361	0.286245	0.231022
gi|116075975	10583000	9039100	11872000			0.523276	0.457514	0.589928	26180000	37877000	37281000			0.763911	1.24575	1.26647	30083000	24953000	22246000			1.76948	1.28889	1.08085
gi|116075978	1016600000	1064600000	1395500032			50.2658	53.8847	69.3433	1465600000	1552800000	1818300032			42.765	51.0705	61.7692	917000000	899699968	865680000			53.938	46.4721	42.0601
gi|116075979	85440000	89711000	64166000			4.22458	4.54072	3.18845	102590000	126840000	147680000			2.99349	4.17168	5.01682	98792000	174060000	80628000			5.81095	8.9907	3.9174
gi|116075981	6408700	6064600	6688300			0.316878	0.30696	0.332346	18248000	32545000	21205000			0.532462	1.07038	0.720352	6432600	6628400	5435500			0.378366	0.342376	0.26409
gi|116075982	1194000	1243300	1044200			0.0590373	0.0629296	0.051887	4502500	3242500	2805300			0.131379	0.106644	0.0952984	2936700	2444200	2391600			0.172737	0.12625	0.116199
gi|116075983	10409000	9153400	8690800			0.514673	0.463299	0.431852	22465000	19879000	15853000			0.65551	0.653807	0.53854	6787500	7958100	13613000			0.399241	0.411059	0.661403
gi|116075984	172220000	93912000	170030000			8.51541	4.75335	8.44891	211580000	184740000	224710000			6.17373	6.07597	7.63359	212100000	155120000	233730000			12.4757	8.0124	11.356
gi|116075985	0	802450	0			0	0.040616	0	-	-	-			-	-	-	-	-	-			-	-	-
gi|116075986	109750000	94283000	101880000			5.42659	4.77213	5.06249	149600000	130420000	122170000			4.36521	4.28943	4.15022	77104000	88494000	109290000			4.53526	4.57097	5.30998
gi|116075987	90394000	89050000	68072000			4.46953	4.50726	3.38254	80867000	87623000	85054000			2.35963	2.88186	2.88936	79165000	49290000	84041000			4.65649	2.54597	4.08323
gi|116075988	121610000	118070000	170740000			6.013	5.97611	8.48419	805049984	773840000	1025500032			23.4907	25.4511	34.8371	206460000	142580000	239220000			12.144	7.36467	11.6228
gi|116075990	2983300	3162700	1812600			0.147509	0.16008	0.0900693	10791000	9253100	14517000			0.314873	0.304328	0.493155	3747600	4216400	3422700			0.220434	0.217789	0.166296
gi|116075992	19410000	18814000	12788000			0.959727	0.95227	0.635444	62258000	77636000	69999000			1.81664	2.5534	2.37793	44948000	28729000	21713000			2.64384	1.48394	1.05495
gi|116075994	4532100	5441200	4058600			0.22409	0.275406	0.201675	9454100	7675400	14703000			0.275863	0.252439	0.499473	12733000	5174300	8978500			0.748956	0.267268	0.436231
gi|116075996	282940000	378100000	429240000			13.99	19.1375	21.3292	534940000	764200000	1006300032			15.6091	25.134	34.1849	214750000	460080000	445369984			12.6316	23.7645	21.6388
gi|116075997	2032200	0	0			0.100482	0	0	-	-	-			-	-	-	-	-	-			-	-	-
gi|116076002	138890000	145010000	156990000			6.86741	7.33968	7.80094	162270000	177220000	168620000			4.73491	5.82865	5.72817	145630000	202390000	154480000			8.56597	10.454	7.50559
gi|116076003	738700	590420	1206600			0.036525	0.0298841	0.0599568	23350000	23739000	21947000			0.681334	0.78076	0.745558	3730300	4777900	4814300			0.219417	0.246792	0.233908
gi|116076007	1119200	1430200	0			0.0553388	0.0723895	0	3255100	3081100	2568200			0.0949812	0.101335	0.0872439	1621500	2004800	1961400			0.0953767	0.103554	0.0952969
gi|116076009	24799000	29457000	23652000			1.22619	1.49097	1.17528	91467000	65049000	91164000			2.66893	2.13942	3.09692	88819000	107230000	94266000			5.22434	5.53874	4.58002
gi|116076010	6954299904	8457699840	9408000000			343.855	428.086	467.49	9554599936	10330999808	9232199680			278.795	339.78	313.626	12705000448	17923000320	15372999680			747.309	925.775	746.915
gi|116076012	1509000	1245100	1615000			0.0746125	0.0630207	0.0802504	23248000	4240700	11855000			0.678358	0.139474	0.402724	54426000	52165000	45612000			3.20134	2.69447	2.21611
gi|116076014	110340000	111740000	225650000			5.45576	5.65572	11.2127	50881000	52613000	64938000			1.48467	1.73041	2.206	0	25483000	32198000			0	1.31627	1.56438
gi|116076015	10752000	10887000	10620000			0.531632	0.551045	0.527715	12333000	9960400	7063100			0.359867	0.327591	0.23994	12974000	12005000	15544000			0.763132	0.620093	0.755223
gi|116076016	18931000	23422000	24151000			0.936043	1.1855	1.20008	30603000	27489000	31680000			0.892971	0.904095	1.0762	56631000	54388000	51183000			3.33104	2.8093	2.48678
gi|116076017	1038400000	1070700032	1504300032			51.3437	54.1935	74.7497	647390016	629009984	879600000			18.8903	20.6877	29.8808	1299900032	1935500032	1513299968			76.4602	99.9742	73.5254
gi|116076018	91999000	88147000	82245000			4.54889	4.46156	4.08681	8893000	6392600	5177200			0.259491	0.210248	0.175874	11819000	15268000	19535000			0.695194	0.788636	0.94913
gi|116076020	18889000	19595000	17432000			0.933966	0.9918	0.866208	46708000	36962000	52734000			1.3629	1.21566	1.79142	16369000	15191000	11533000			0.962826	0.784659	0.560344
gi|116076022	37030000	51174000	43653000			1.83095	2.59017	2.16915	73820000	58921000	45925000			2.15401	1.93787	1.56011	9686200	13149000	9489200			0.569743	0.679184	0.461044
gi|116076023	4642200064	4235800064	3021299968			229.533	214.395	150.13	2910700032	2428100096	2224900096			84.9319	79.8586	75.5818	4517000192	5361900032	4886499840			265.69	276.958	237.416
gi|116076025	310750	0	0			0.015365	0	0	-	-	-			-	-	-	-	-	-			-	-	-
gi|116076028	21321000	18339000	24597000			1.05422	0.928228	1.22224	10023000	7538800	9840900			0.292463	0.247946	0.334304	4631700	5796200	6873300			0.272437	0.29939	0.333947
gi|116076029	1886300032	2144700032	2095000064			93.2681	108.554	104.102	2138400000	2298500096	3463200000			62.3968	75.5961	117.648	1064600000	1527900032	1482000000			62.6198	78.9205	72.0047
gi|116076031	433690	496300	0			0.0214438	0.0251202	0	4929500	2920100	1873400			0.143839	0.0960401	0.063641	1066800	1400800	1081600			0.0627493	0.0723554	0.0525508
gi|116076032	6381400	6435700	5635500			0.315528	0.325743	0.280032	6915400	5370400	6733500			0.201786	0.176629	0.228743	0	980480	914580			0	0.0506446	0.0444359
gi|116076033	67067000	77525000	46941000			3.31613	3.92393	2.33253	35314000	29405000	21999000			1.03043	0.967111	0.747325	95775000	83208000	93092000			5.63349	4.29793	4.52298
gi|116076035	86979000	77964000	49033000			4.30067	3.94615	2.43648	220550000	173440000	120810000			6.43547	5.70432	4.10402	162830000	147200000	191050000			9.57767	7.60331	9.28238
gi|116076036	2938900	2860500	2011800			0.145314	0.144784	0.0999677	10931000	7703300	6198100			0.318958	0.253356	0.210555	0	1168200	1780600			0	0.0603409	0.0865125
gi|116076037	3723400	2752200	3478400			0.184103	0.139303	0.172844	8405200	9556800	9947000			0.245257	0.314317	0.337908	1735400	2181700	3368000			0.102076	0.112691	0.163638
gi|116076038	12640000	16537000	15811000			0.624985	0.83702	0.785659	58841000	79155000	45642000			1.71693	2.60335	1.5505	5877900	22005000	11104000			0.345738	1.13662	0.539501
gi|116076039	328049984	197730000	371400000			16.2204	10.0081	18.4551	495280000	553920000	487560000			14.4519	18.2181	16.5628	734209984	651350016	787059968			43.1863	33.6441	38.2402
gi|116076040	579169984	587600000	639270016			28.637	29.7414	31.7658	810280000	885070016	740200000			23.6433	29.1094	25.1452	632710016	780689984	650899968			37.216	40.3249	31.6247
gi|116076041	29113000	31330000	24055000			1.43949	1.58577	1.19531	138810000	124620000	130010000			4.05036	4.09867	4.41655	8817800	11610000	12379000			0.518664	0.59969	0.601448
gi|116076042	678640	1372900	2991200			0.0335553	0.0694893	0.148635	1029500	677930	1041900			0.03004	0.0222967	0.0353942	163200	248040	226130			0.00959944	0.012812	0.0109868
gi|116076043	1142400000	965289984	859340032			56.4859	48.8581	42.7012	2300999936	2709700096	3957900032			67.1413	89.1202	134.453	2129799936	669539968	1273100032			125.275	34.5837	61.855
gi|116076046	1595700	1547100	1892900			0.0788994	0.0783064	0.0940595	3629400	2186700	2234500			0.105903	0.0719191	0.0759079	0	725730	887020			0	0.0374861	0.0430969
gi|116076048	185860000	135890000	218360000			9.18984	6.87807	10.8505	117640000	131630000	136360000			3.43264	4.32922	4.63227	57181000	40001000	43955000			3.36339	2.06617	2.1356
gi|116076049	7597500	19162000	9761000			0.375658	0.969884	0.485031	10813000	11756000	11431000			0.315515	0.386647	0.388321	4939600	3238100	3876700			0.290548	0.167257	0.188354
gi|116076052	1229900	1215500	1819100			0.0608124	0.0615225	0.0903923	3483200	3118100	2792100			0.101637	0.102552	0.09485	1402700	1480100	0			0.0825069	0.0764514	0
gi|116076054	10901000	8188900	12638000			0.539	0.414481	0.627991	51058000	52407000	39821000			1.48983	1.72363	1.35275	11730000	12680000	11926000			0.689959	0.654959	0.579438
gi|116076055	629850	758940	585480			0.0311429	0.0384137	0.0290929	5007400	4463100	3789300			0.146112	0.146788	0.128726	0	653350	840250			0	0.0337474	0.0408245
gi|116076057	175740000	215590000	271180000			8.68946	10.9121	13.4751	273580000	183660000	147940000			7.98284	6.04045	5.02565	94283000	81804000	61998000			5.54573	4.22541	3.01224
gi|116076058	33694000	27593000	26235000			1.666	1.39662	1.30363	25693000	22337000	16237000			0.749701	0.734649	0.551585	14649000	17350000	21081000			0.861655	0.896178	1.02424
gi|116076059	257270000	204310000	160290000			12.7207	10.3411	7.96492	243530000	212370000	106080000			7.10601	6.98471	3.60363	46882000	70791000	75201000			2.7576	3.65656	3.65373
gi|116076060	30066000	28519000	32812000			1.48661	1.44349	1.63045	14964000	18378000	21310000			0.436637	0.60444	0.723919	66155000	77112000	69370000			3.89124	3.98306	3.37042
gi|116076062	2891000	2918600	2491000			0.142945	0.147725	0.123779	2907000	2524500	2119100			0.0848239	0.0830291	0.0719876	2855900	1752300	1769800			0.167984	0.0905114	0.0859878
gi|116076064	7809100	12010000	5105200			0.386121	0.607886	0.253681	4107000	2485100	3079800			0.119839	0.0817333	0.104623	1978100	3045200	1527900			0.116352	0.157293	0.0742348
gi|116076067	0	0	1623900			0	0	0.0806927	3571200	2800900	4177000			0.104205	0.0921197	0.141896	3294000	2856700	2156400			0.193753	0.147557	0.104771
gi|116076070	64330000	72319000	52313000			3.1808	3.66042	2.59947	-	-	-			-	-	-	0	0	4285800			0	0	0.20823
gi|116076071	3144300032	3152000000	5359699968			155.47	159.538	266.327	4891200000	4465399808	3706800128			142.721	146.864	125.923	8045499904	10284999680	9029499904			473.237	531.25	438.709
gi|116076072	72516000	72424000	67306000			3.58555	3.66574	3.34448	75549000	47629000	51640000			2.20446	1.56649	1.75425	1882100	18550000	17072000			0.110705	0.958161	0.829463
gi|116076073	632070016	870899968	598830016			31.2527	44.0806	29.7563	4647500	5033200	4526900			0.13561	0.165539	0.153783	2521100	1941800	2120600			0.148291	0.1003	0.103032
gi|116076081	8018500	18290000	7519200			0.396475	0.925748	0.373634	-	-	-			-	-	-	-	-	-			-	-	-
gi|116076082	36465000	32293000	29744000			1.80301	1.63451	1.478	71025000	91708000	55098000			2.07245	3.01621	1.87173	35215000	35083000	33973000			2.07135	1.81214	1.65062
gi|116076083	11469000	11907000	13547000			0.567084	0.602672	0.67316	86189000	60280000	57280000			2.51493	1.98257	1.94585	18169000	29117000	29191000			1.0687	1.50398	1.41828
gi|116076086	358230016	311369984	340480000			17.7127	15.76	16.9187	260860000	275460000	145950000			7.61168	9.05969	4.95805	320160000	429969984	400049984			18.8318	22.2092	19.4369
gi|116076088	770060	588700	766400			0.0380756	0.029797	0.0380829	2943000	2267800	2361700			0.0858744	0.0745864	0.080229	0	328910	357370			0	0.0169892	0.0173632
gi|116076090	183090	0	0			0.00905288	0	0	-	-	-			-	-	-	892240	884040	1820900			0.0524816	0.0456632	0.0884705
gi|116076091	19332000	19673000	34038000			0.95587	0.995748	1.69137	172950000	219580000	158320000			5.04654	7.22184	5.37827	138980000	213600000	158700000			8.17481	11.0331	7.71062
gi|116076092	4351600	9839900	5042700			0.215165	0.498046	0.250575	7126600	9051300	8254400			0.207948	0.297691	0.280409	906780	3171900	3531000			0.0533369	0.163838	0.171558
gi|116076094	20318000	19139000	19114000			1.00462	0.96872	0.949788	12543000	10851000	11580000			0.365995	0.356882	0.393382	0	3064800	2724300			0	0.158306	0.132363
gi|116076095	5598600	4795500	4115200			0.276823	0.242724	0.204487	1894900	1590100	3707900			0.0552916	0.0522973	0.125961	0	7361000	5030400			0	0.380217	0.244408
gi|116076099	7284900	10830000	13432000			0.360202	0.54816	0.667445	16700000	16216000	15726000			0.487292	0.533333	0.534226	12764000	11174000	13268000			0.750779	0.577169	0.644641
gi|116076100	12109000	12016000	15785000			0.598729	0.60819	0.784367	20342000	20713000	15401000			0.593563	0.681237	0.523185	26249000	31289000	14519000			1.54397	1.61617	0.705422
gi|116076101	1102300032	1066099968	1004600000			54.5032	53.9606	49.9193	2469799936	1793100032	1510800000			72.0668	58.9739	51.3232	1612800000	1519800064	1471100032			94.865	78.5021	71.4751
gi|116076102	180320000	186810000	192900000			8.91592	9.45538	9.58533	168430000	145060000	175170000			4.91465	4.77093	5.95067	162760000	251810000	198170000			9.57355	13.0067	9.62832
gi|116076103	34378000	35587000	20372000			1.69982	1.80124	1.0123	41576000	33510000	34497000			1.21315	1.10212	1.17189	38702000	31786000	29357000			2.27645	1.64184	1.42634
gi|116076106	9359800	10415000	11833000			0.462795	0.527155	0.58799	3994100	2844400	3573500			0.116545	0.0935504	0.121395	3283800	2971100	1781800			0.193153	0.153466	0.0865708
gi|116076108	288440000	284960000	274590016			14.2619	14.4232	13.6446	502920000	542870016	456889984			14.6748	17.8546	15.5209	205730000	137050000	144130000			12.1011	7.07903	7.00272
gi|116076109	11929000	14135000	15853000			0.589829	0.715443	0.787746	44858000	19496000	45546000			1.30892	0.64121	1.54724	6525900	19627000	14891000			0.383854	1.01379	0.723496
gi|116076110	33583000	18461000	27196000			1.66051	0.934403	1.35139	116050000	98687000	130800000			3.38624	3.24575	4.44339	21873000	26578000	29422000			1.28657	1.37283	1.4295
gi|116076113	0	1470900	1622600			0	0.0744496	0.0806281	-	-	-			-	-	-	0	0	559550			0	0	0.0271864
gi|116076116	41357000	25651000	34948000			2.0449	1.29832	1.73659	36289000	40746000	112820000			1.05888	1.34011	3.83259	69015000	52087000	46885000			4.05947	2.69044	2.27796
gi|116076117	9576600	10934000	14287000			0.473515	0.553424	0.709931	141720000	130530000	110460000			4.13527	4.29304	3.75242	7469500	11813000	9629200			0.439357	0.610176	0.467846
gi|116076118	40529000	38401000	52613000			2.00396	1.94367	2.61438	20575000	10540000	18301000			0.600362	0.346654	0.621701	14726000	16998000	14450000			0.866184	0.877996	0.70207
gi|116076119	7893300	12025000	11562000			0.390284	0.608645	0.574524	9979400	12397000	15743000			0.291191	0.407729	0.534803	22308000	0	21991000			1.31216	0	1.06846
gi|116076121	3495700	3483300	5048900			0.172845	0.176307	0.250883	11939000	11290000	10086000			0.34837	0.371321	0.34263	6046100	7598400	5742300			0.355632	0.392479	0.278996
gi|116076122	416609984	437160000	396440000			20.5993	22.1268	19.6994	1106800000	1254099968	1587399936			32.2955	41.2465	53.9253	303550016	231600000	233930000			17.8548	11.9628	11.3658
gi|116076123	4116600064	4614700032	2746099968			203.545	233.573	136.456	6452800000	9191100416	9363300352			188.287	302.289	318.079	7367699968	9304999936	7193299968			433.369	480.63	349.495
gi|116076125	28989000	12497000	23412000			1.43336	0.632535	1.16336	71661000	63790000	54636000			2.09101	2.09801	1.85603	32054000	46406000	35056000			1.88542	2.397	1.70324
gi|116076127	10053000	16593000	16266000			0.49707	0.839854	0.808269	8586800	11542000	7822700			0.250556	0.379609	0.265744	3838700	4523700	5230400			0.225793	0.233662	0.254125
gi|116076129	35207000	18436000	24476000			1.74081	0.933138	1.21623	37335000	58851000	85339000			1.08941	1.93557	2.89904	127700000	112630000	97138000			7.51132	5.81767	4.71956
gi|116076132	890270	0	0			0.0440194	0	0	911490	505580	4371200			0.0265965	0.0166282	0.148493	0	0	594280			0	0	0.0288738
gi|116076133	6846300	6959400	7365300			0.338515	0.35225	0.365987	4034600	5228900	5111900			0.117726	0.171975	0.173656	9916900	13292000	7862000			0.583313	0.68657	0.381984
gi|116076136	1886700	1590000	2481900			0.0932878	0.0804778	0.123327	3223000	2935400	2461000			0.0940445	0.0965433	0.0836023	1829200	2784500	939730			0.107594	0.143827	0.0456579
gi|116076137	406500	0	0			0.0200994	0	0	1185300	1430000	1028000			0.0345861	0.0470317	0.034922	-	-	-			-	-	-
gi|116076138	67938000	50223000	88590000			3.35919	2.54204	4.4021	93927000	64246000	54031000			2.74071	2.11301	1.83548	8301200	16546000	24947000			0.488277	0.854649	1.21208
gi|116076141	3051500	2382000	3407400			0.150881	0.120565	0.169316	2060500	1683800	2236300			0.0601237	0.055379	0.075969	0	457840	759900			0	0.0236488	0.0369206
gi|116076142	4874000	4571200	0			0.240995	0.231371	0	1111000	1173000	0			0.0324181	0.0385792	0	-	-	-			-	-	-
gi|116076143	75544000	83442000	84277000			3.73527	4.22341	4.18778	246260000	217550000	214140000			7.18567	7.15507	7.27452	86549000	128890000	103540000			5.09082	6.65754	5.03061
gi|116076147	1333200	0	0			0.06592	0	0	3712000	2988200	2045600			0.108313	0.0982799	0.0694908	0	320430	433340			0	0.0165511	0.0210543
gi|116076148	87332000	90387000	191140000			4.31813	4.57494	9.49788	108780000	183630000	173880000			3.17411	6.03947	5.90685	199420000	170620000	190740000			11.7299	8.81302	9.26732
gi|116076149	26476000	22082000	24205000			1.30911	1.11768	1.20276	123010000	113720000	81310000			3.58933	3.74017	2.76217	42145000	49962000	59783000			2.47897	2.58068	2.90463
gi|116076154	126650000	98042000	101860000			6.26221	4.96239	5.06149	184390000	145680000	125980000			5.38035	4.79132	4.27965	52695000	52231000	39266000			3.09952	2.69788	1.90778
gi|116076155	53278000	44339000	32517000			2.63433	2.24422	1.61579	14631000	15430000	29224000			0.426921	0.507482	0.992764	43901000	43765000	44152000			2.58226	2.26059	2.14518
gi|116076156	5472900	4955000	6472800			0.270607	0.250797	0.321638	8243000	5519800	0			0.240524	0.181543	0	7108000	3314300	6715300			0.418093	0.171193	0.326271
gi|116076157	164370000	160320000	226150000			8.12727	8.11459	11.2375	286870016	268660000	268460000			8.37063	8.83605	9.11982	142650000	154710000	141480000			8.39068	7.99122	6.87397
gi|116076160	13911000	16585000	18530000			0.687829	0.839449	0.920768	47690000	55317000	52521000			1.39156	1.81934	1.78418	38277000	38094000	34543000			2.25146	1.96767	1.67831
gi|116076161	66603000	94131000	101310000			3.29318	4.76444	5.03416	290640000	175320000	200520000			8.48064	5.76616	6.81184	40522000	67518000	61345000			2.38351	3.4875	2.98052
gi|116076162	72642000	50940000	69390000			3.59178	2.57833	3.44804	149170000	157990000	172530000			4.35266	5.19618	5.86099	295630016	184240000	293520000			17.389	9.51653	14.261
gi|116076169	315249984	251620000	207650000			15.5875	12.7357	10.3183	223470000	405580000	380990016			6.52067	13.3393	12.9426	390340000	355960000	474529984			22.9598	18.3864	23.0556
gi|116076170	2580800	2342700	0			0.127608	0.118576	0	2296200	2061500	14891000			0.0670013	0.0678013	0.50586	3772600	2529900	3038200			0.221905	0.130677	0.147614
gi|116076172	3368000	2757300	2779000			0.166531	0.139561	0.13809	0	0	994820			0	0	0.0337949	1658800	0	0			0.0975707	0	0
gi|116076173	283550	283620	466340			0.0140201	0.0143554	0.0231727	6088000	5792900	4343100			0.177643	0.190525	0.147539	983050	503810	701180			0.0578231	0.0260232	0.0340676
gi|116076175	135320000	159850000	136390000			6.69089	8.0908	6.77731	421390016	481529984	428070016			12.2958	15.8372	14.5419	145310000	149450000	219760000			8.54714	7.71952	10.6773
gi|116076176	993870	773590	729180			0.0491419	0.0391552	0.0362334	8424500	6715200	9118700			0.24582	0.220858	0.30977	14701000	8516000	8096000			0.864714	0.439876	0.393353
gi|116076178	2161600000	2102300032	1228999936			106.88	106.408	61.0698	3242099968	2630099968	2713999872			94.6018	86.5022	92.1969	1475600000	1456099968	1519100032			86.7949	75.2118	73.8072
gi|116076179	21989000	13348000	20932000			1.08725	0.675609	1.04013	43506000	24353000	47867000			1.26947	0.800954	1.62608	43179000	34242000	30759000			2.53979	1.7687	1.49446
gi|116076180	430380000	442660000	487300000			21.2801	22.4052	24.2143	1175500032	1014800000	1093100032			34.3001	33.3761	37.1335	489849984	475350016	540190016			28.813	24.5532	26.2457
gi|116076183	19417000	22556000	17966000			0.960073	1.14167	0.892743	12569000	11647000	8527900			0.366753	0.383062	0.2897	1202400	4534500	6388500			0.0707253	0.23422	0.310393
gi|116076185	224300000	221560000	246140000			11.0905	11.2143	12.2309	224380000	239220000	226440000			6.54723	7.86778	7.69236	62587000	53786000	48491000			3.68137	2.7782	2.35599
gi|116076186	1422599936	1223399936	1242000000			70.3404	61.9224	61.7158	1458300032	2148800000	2879099904			42.552	70.6726	97.8055	2191699968	2094899968	1912899968			128.916	108.208	92.9404
gi|116076187	140940000	162160000	153420000			6.96878	8.20772	7.62354	243530000	262370000	322849984			7.10601	8.62917	10.9675	132610000	147770000	115880000			7.80013	7.63275	5.63016
gi|116076188	2415000	1895100	1856900			0.11941	0.0959204	0.0922706	5197700	5391200	4092800			0.151665	0.177313	0.139036	0	0	538260			0	0	0.026152
gi|116076189	145060000	123780000	114750000			7.17249	6.26512	5.70201	222320000	193430000	182490000			6.48712	6.36178	6.19934	85153000	66448000	64499000			5.00871	3.43223	3.13376
gi|116076192	32966000	30227000	31347000			1.63	1.52994	1.55765	87188000	76120000	50487000			2.54408	2.50354	1.71509	36318000	33212000	71720000			2.13623	1.7155	3.4846
gi|116076194	66316000	63884000	57465000			3.27899	3.23349	2.85547	264150000	186970000	289809984			7.70768	6.14932	9.84509	189480000	139730000	110670000			11.1452	7.21746	5.37703
gi|116076195	1202300	1505200	1379600			0.0594477	0.0761857	0.0685533	-	-	-			-	-	-	997390	1093600	1428800			0.0586665	0.0564876	0.0694199
gi|116076197	633510016	689089984	700470016			31.3239	34.8783	34.8068	837369984	780329984	1287800064			24.4338	25.6645	43.7477	844080000	561440000	704809984			49.6488	29	34.244
gi|116076198	82740000	91713000	96690000			4.09108	4.64205	4.80459	148880000	118180000	139940000			4.3442	3.88686	4.75388	44733000	35021000	45655000			2.6312	1.80894	2.2182
gi|116076200	134930000	131700000	150480000			6.67161	6.66599	7.47745	344680000	489640000	500929984			10.0575	16.1039	17.017	171970000	192540000	160220000			10.1153	9.94525	7.78447
gi|116076202	146490000	122190000	158280000			7.2432	6.18464	7.86504	228690000	295769984	224060000			6.67299	9.72768	7.61151	41772000	81270000	112610000			2.45703	4.19783	5.47129
gi|116076203	298350016	350849984	351180000			14.7519	17.7583	17.4504	532350016	906750016	424030016			15.5335	29.8224	14.4047	1043900032	665900032	808889984			61.4023	34.3957	39.3008
gi|116076207	3907500	3832300	2819400			0.193206	0.193972	0.140098	12870000	7906300	6812000			0.375536	0.260033	0.231409	4721500	5248800	6522200			0.277719	0.271116	0.316889
gi|116076211	91182000	100800000	122380000			4.50849	5.10199	6.08114	85349000	78012000	55469000			2.49041	2.56576	1.88433	72200000	51807000	43873000			4.24681	2.67598	2.13162
gi|116076212	7705600	4580000	17325000			0.381003	0.231817	0.860891	5758800	6062400	7738700			0.168037	0.199388	0.26289	226490	483380	695130			0.0133222	0.024968	0.0337737
gi|116076214	4979899904	5311600128	4539100160			246.231	268.846	225.551	3466700032	3260499968	4657200128			101.155	107.236	158.209	3027000064	3030099968	2298400000			178.048	156.513	111.67
gi|116076215	13484000	12851000	15465000			0.666716	0.650453	0.768466	43286000	35870000	34707000			1.26305	1.17974	1.17903	39645000	51531000	35207000			2.33192	2.66173	1.71057
gi|116076216	87962000	62689000	91333000			4.34928	3.173	4.5384	319550016	200390000	210850000			9.32421	6.59069	7.16275	58424000	86655000	76717000			3.4365	4.47598	3.72738
gi|116076217	28649000	16498000	11205000			1.41655	0.835046	0.556784	186440000	180150000	517780000			5.44017	5.92501	17.5894	325140000	136360000	123390000			19.1248	7.04339	5.99504
gi|116076219	0	0	7808700			0	0	0.38802	-	-	-			-	-	-	-	-	-			-	-	-
gi|116076220	218280000	262280000	316950016			10.7929	13.2753	15.7495	302150016	364460000	413950016			8.81649	11.9868	14.0622	302049984	710070016	283460000			17.7666	36.6772	13.7722
gi|116076222	27266000	28415000	26377000			1.34817	1.43822	1.31069	25999000	19660000	17341000			0.75863	0.646604	0.589089	10410000	10676000	13156000			0.612317	0.551446	0.639199
gi|116076223	315830	0	0			0.0156162	0	0	0	0	232860			0	0	0.00791045	680750	0	0			0.0400418	0	0
gi|116076225	715220	531900	0			0.035364	0.0269221	0	5842200	1959400	0			0.170471	0.0644433	0	-	-	-			-	-	-
gi|116076226	149350000	159380000	127350000			7.38461	8.06701	6.32811	219790000	220370000	287009984			6.41329	7.24782	9.74997	95366000	76330000	102650000			5.60943	3.94267	4.98737
gi|116076227	59905000	60732000	67947000			2.962	3.07395	3.37633	89266000	64614000	72573000			2.60471	2.12511	2.46537	47904000	75079000	54197000			2.81772	3.87805	2.63322
gi|116076228	93074000	110390000	152510000			4.60204	5.58739	7.57832	246430000	314049984	243100000			7.19063	10.3289	8.25831	252780000	234260000	259400000			14.8685	12.1002	12.6032
gi|116076229	3125600	3450400	2967400			0.154545	0.174642	0.147452	12247000	15686000	12109000			0.357358	0.515902	0.411353	1956800	2825500	1418800			0.115099	0.145945	0.068934
gi|116076232	1301500	1431100	0			0.0643526	0.0724351	0	-	-	-			-	-	-	0	2067100	0			0	0.106772	0
gi|116076234	196360000	184900000	97349000			9.70902	9.35871	4.83734	399129984	480700000	521990016			11.6463	15.8099	17.7324	164690000	167110000	162880000			9.68708	8.63171	7.91371
gi|116076237	418070016	462950016	430120000			20.6715	23.4322	21.373	60402000	67616000	70931000			1.76248	2.22384	2.40959	258030000	213260000	290760000			15.1773	11.0155	14.1269
gi|116076244	13573000	16167000	19023000			0.671117	0.818292	0.945266	15141000	19285000	15586000			0.441802	0.634271	0.52947	16080000	24941000	24040000			0.945827	1.28827	1.16801
gi|116076245	6855700	7217200	6964300			0.33898	0.365298	0.346061	4626900	4879500	2998700			0.135009	0.160483	0.101868	23284000	26436000	36090000			1.36957	1.3655	1.75347
gi|116076247	183560000	246500000	251300000			9.07612	12.4766	12.4873	42132000	37196000	52213000			1.22938	1.22335	1.77372	217570000	166540000	159080000			12.7975	8.60227	7.72908
gi|116076249	0	0	795980			0	0	0.0395528	4109800	4288700	4793400			0.119921	0.141052	0.162836	-	-	-			-	-	-
gi|116076250	559379968	502720000	488580000			27.6585	25.4452	24.2779	504860000	343080000	371600000			14.7314	11.2837	12.6236	491169984	515449984	477680000			28.8907	26.6245	23.2086
gi|116076256	172650000	124950000	127720000			8.53668	6.32434	6.34649	76148000	83083000	109050000			2.22194	2.73254	3.70452	67577000	87743000	72242000			3.97488	4.53218	3.50996
gi|116076257	51052000	41040000	54874000			2.52427	2.07724	2.72673	131430000	115850000	81085000			3.83502	3.81023	2.75453	36387000	94144000	67385000			2.14029	4.86281	3.27398
gi|116076259	259300	249020	237450			0.0128211	0.0126041	0.0117991	1486600	1143400	981120			0.0433778	0.0376057	0.0333295	468230	800050	403480			0.0275413	0.0413249	0.0196035
gi|116076260	367560000	536569984	483710016			18.174	27.1585	24.0359	1087100032	1475399936	1296000000			31.7207	48.5249	44.0262	668620032	365980000	438409984			39.3283	18.9039	21.3007
gi|116076261	7281900	4843800	4943700			0.360053	0.245169	0.245656	15200000	13268000	8550800			0.443524	0.436376	0.290478	12465000	12051000	11448000			0.733192	0.622469	0.556214
gi|116076264	7766900	5903600	5585300			0.384034	0.298811	0.277537	74059000	63937000	106490000			2.16098	2.10284	3.61756	34372000	40431000	20818000			2.02176	2.08838	1.01147
gi|116076265	33285000	32385000	31347000			1.64578	1.63917	1.55765	30462000	34872000	33274000			0.888856	1.14692	1.13035	5411300	8732100	9972500			0.318293	0.451038	0.484525
gi|116076268	943980	748000	1359000			0.0466751	0.03786	0.0675296	2475100	2951800	2325900			0.0722214	0.0970827	0.0790128	0	985760	0			0	0.0509174	0
gi|116076269	137020000	110360000	146990000			6.77495	5.58587	7.30403	32878000	27868000	26346000			0.959353	0.91656	0.894996	19882000	33312000	28088000			1.16946	1.72066	1.36469
gi|116076270	30122000	27994000	31165000			1.48938	1.41692	1.54861	20629000	19812000	19522000			0.601937	0.651603	0.663179	11364000	14071000	10903000			0.668431	0.726808	0.529735
gi|116076272	266310000	316200000	262170000			13.1677	16.0045	13.0274	728499968	860579968	722499968			21.257	28.3039	24.5439	470100000	785080000	454600000			27.6513	40.5517	22.0873
gi|116076276	9168600	9705200	9924800			0.453341	0.491228	0.49317	30509000	33883000	26753000			0.890228	1.11439	0.908822	4715200	7114000	7722400			0.277348	0.367459	0.375202
gi|116076277	13831000	16860000	20819000			0.683874	0.853368	1.03451	-	-	-			-	-	-	-	-	-			-	-	-
gi|116076280	2519399936	2701600000	3622000128			124.572	136.741	179.98	3228600064	3863699968	4792200192			94.2079	127.074	162.795	3562400000	3287200000	2902599936			209.541	169.793	141.026
gi|116076281	1250300032	1159600000	998489984			61.8211	58.6931	49.6156	812169984	1105900032	994160000			23.6985	36.3723	33.7725	1993600000	1742700032	1995500032			117.264	90.0155	96.9537
gi|116076282	7060900	5854600	7563900			0.349126	0.29633	0.375855	2827800	2147400	2707300			0.0825129	0.0706265	0.0919693	14506000	14467000	12826000			0.853244	0.747262	0.623166
gi|116076284	31175000	28810000	22238000			1.54145	1.45822	1.10502	93805000	80913000	128670000			2.73715	2.66117	4.37103	23189000	21612000	13484000			1.36398	1.11632	0.655136
gi|116076287	61366000	78707000	63109000			3.03424	3.98375	3.13593	64362000	54776000	56821000			1.87803	1.80155	1.93026	25092000	34105000	28367000			1.47591	1.76162	1.37824
gi|116076288	151950000	139640000	73666000			7.51316	7.06787	3.66051	171050000	127930000	171100000			4.9911	4.20753	5.81241	197180000	200780000	217670000			11.5981	10.3709	10.5757
gi|116076290	15330000	17525000	10801000			0.757992	0.887027	0.536709	28567000	18156000	28698000			0.833562	0.597139	0.974896	14594000	14785000	15884000			0.85842	0.763688	0.771742
gi|116076291	0	2975600	62999000			0	0.15061	3.13046	4877300	4241200	3076700			0.142316	0.13949	0.104518	-	-	-			-	-	-
gi|116076292	1988300032	2193499904	2873200128			98.3115	111.024	142.771	1628899968	1639299968	1181400064			47.53	53.9155	40.1332	2602099968	4239699968	2444400128			153.056	218.993	118.764
gi|116076293	3085800	1712800	5025300			0.152577	0.0866933	0.249711	-	-	-			-	-	-	0	0	4819700			0	0	0.234171
gi|116076300	811550016	716230016	901710016			40.1271	36.252	44.8066	1038000000	879910016	1048300032			30.288	28.9396	35.6116	584089984	613529984	639299968			34.3562	31.6906	31.0611
gi|116076301	19875000	19745000	23326000			0.982719	0.999393	1.15908	18672000	10427000	13595000			0.544834	0.342937	0.461834	0	5614000	5537400			0	0.289979	0.269041
gi|116076303	1385600	1361200	0			0.068511	0.0688971	0	4879600	6098700	6876500			0.142383	0.200582	0.233601	0	605230	513570			0	0.0312619	0.0249524
gi|116076304	3324700	3582600	3261600			0.16439	0.181333	0.162071	5246800	4426700	3353800			0.153097	0.145591	0.113931	4096800	6064200	7052100			0.240974	0.313233	0.342634
gi|116076305	837529984	698049984	809920000			41.4117	35.3318	40.2455	863740032	1047400000	1143500032			25.2032	34.4483	38.8457	1210499968	1507900032	1394400000			71.2017	77.8874	67.7485
gi|116076306	0	624510	454650			0	0.0316096	0.0225919	2554000	1993500	1518600			0.0745236	0.0655649	0.0515881	3065600	1881300	3376100			0.180319	0.0971746	0.164032
gi|116076307	4058400	3696400	5349200			0.200668	0.187093	0.265805	2255500	3951200	4205600			0.0658137	0.129952	0.142868	0	4062600	0			0	0.209845	0
gi|116076309	4956500	4538800	5040500			0.245074	0.229731	0.250466	6282500	3733600	8912000			0.183318	0.122796	0.302748	11674000	6504100	4746600			0.686665	0.335956	0.230619
gi|116076310	121370000	126310000	131220000			6.00114	6.39318	6.52041	121130000	101070000	108800000			3.53448	3.32412	3.69603	99568000	97757000	87919000			5.8566	5.04943	4.27165
gi|116076311	2112700	6698100	1010100			0.104462	0.339024	0.0501926	-	-	-			-	-	-	463760	994040	648690			0.0272784	0.051345	0.0315173
gi|116076312	2562800	1916400	2760600			0.126718	0.0969985	0.137176	5454500	6203100	5770400			0.159158	0.204016	0.196025	1627400	2316400	2906700			0.0957238	0.119649	0.141225
gi|116076313	23487000	24538000	24022000			1.16131	1.24199	1.19367	19755000	17187000	27471000			0.576435	0.565269	0.933213	48158000	46081000	39772000			2.83266	2.38022	1.93237
gi|116076314	945100	0	1038300			0.0467305	0	0.0515938	0	0	1845500			0	0	0.0626932	3536600	3069700	3160400			0.208023	0.158559	0.153552
gi|116076315	328480000	328889984	302800000			16.2417	16.6468	15.0463	237350000	228510000	181290000			6.92568	7.51554	6.15858	481710016	432200000	408940000			28.3342	22.3244	19.8688
gi|116076316	108330000	107050000	124640000			5.35637	5.41833	6.19345	51651000	60177000	31423000			1.50713	1.97918	1.06747	105560000	191520000	167480000			6.20905	9.89256	8.13721
gi|116076319	73200000	59137000	70789000			3.61937	2.99322	3.51755	37408000	45948000	39938000			1.09154	1.5112	1.35673	41570000	49603000	46382000			2.44515	2.56214	2.25352
gi|116076320	1975600	2294100	2352300			0.0976835	0.116116	0.116887	1206000	1578500	2104400			0.0351901	0.0519158	0.0714883	0	191790	226230			0	0.00990651	0.0109916
gi|116076321	21671000	22399000	21717000			1.07152	1.13372	1.07913	36889000	43341000	22826000			1.07639	1.42546	0.775419	14459000	0	30683000			0.850479	0	1.49077
gi|116076323	2503500	2006900	1357000			0.123786	0.101579	0.0674302	4909000	4624600	4302700			0.143241	0.1521	0.146166	-	-	-			-	-	-
gi|116076324	7066900	6747700	5318900			0.349423	0.341535	0.2643	5985000	5727400	7449400			0.174637	0.18837	0.253062	12137000	7689100	6591700			0.713899	0.397164	0.320265
gi|116076325	172880000	154620000	136870000			8.54805	7.82609	6.80116	190950000	161790000	146800000			5.57177	5.32116	4.98692	29245000	36272000	41689000			1.72019	1.87355	2.02551
gi|116076326	9753100	8246100	0			0.482242	0.417376	0	13566000	13070000	7702200			0.395845	0.429864	0.26165	8893900	2318100	14048000			0.52314	0.119737	0.682538
gi|116076327	1899900	2422900	2788200			0.0939405	0.122635	0.138548	24667000	20668000	21382000			0.719763	0.679757	0.726365	5828800	4765100	3637900			0.34285	0.246131	0.176752
gi|116076328	1300300032	1417799936	1619000064			64.2933	71.7619	80.4492	2163699968	2460199936	3341600000			63.135	80.9143	113.517	749529984	631529984	731680000			44.0874	32.6204	35.5495
gi|116076329	46613000	59346000	50725000			2.30478	3.0038	2.52056	6209700	4182000	4499200			0.181194	0.137543	0.152842	0	1167600	1010300			0	0.0603099	0.0490866
gi|116076330	260070000	304240000	386790016			12.8592	15.3991	19.2199	459729984	465380000	505190016			13.4145	15.306	17.1617	78556000	63722000	102020000			4.62067	3.29143	4.95676
gi|116076331	46123000	45874000	72425000			2.28055	2.32191	3.59885	116630000	100940000	119720000			3.40317	3.31985	4.06699	137800000	149850000	179730000			8.10541	7.74019	8.73239
gi|116076332	119330000	104080000	103550000			5.90027	5.26801	5.14547	188170000	159400000	180530000			5.49065	5.24256	6.13276	104140000	90162000	93510000			6.12552	4.65713	4.54329
gi|116076333	6634400	7599900	6944600			0.328038	0.384669	0.345082	57199000	55008000	48159000			1.66902	1.80918	1.636	0	5312100	5973400			0	0.274385	0.290224
gi|116076335	43713000	60316000	74019000			2.16139	3.05289	3.67805	56015000	44707000	44372000			1.63447	1.47038	1.50735	33938000	19915000	23367000			1.99624	1.02867	1.13531
gi|116076338	25893000	26147000	24348000			1.28028	1.32343	1.20987	73400000	65361000	58062000			2.14175	2.14968	1.97242	15601000	21364000	19949000			0.917652	1.10351	0.969245
gi|116076340	263170000	236640000	364760000			13.0124	11.9775	18.1252	305089984	287830016	498030016			8.90228	9.46654	16.9185	508929984	330049984	376489984			29.9353	17.048	18.2922
gi|116076341	3564700	4089200	8385300			0.176257	0.206975	0.416671	15351000	15782000	9849700			0.44793	0.519059	0.334603	8003600	12460000	11564000			0.470772	0.643595	0.56185
gi|116076343	83655000	81867000	120150000			4.13632	4.1437	5.97033	65320000	64862000	59158000			1.90598	2.13327	2.00965	2153900	38254000	39366000			0.126693	1.97593	1.91264
gi|116076344	1244800	1251200	2338900			0.0615491	0.0633295	0.116222	5393700	3091900	2362600			0.157384	0.101691	0.0802595	2600900	2741700	4181800			0.152985	0.141617	0.203178
gi|116076345	99584000	111300000	143060000			4.92393	5.63345	7.10875	114430000	138770000	124350000			3.33897	4.56405	4.22428	158920000	178670000	184900000			9.34769	9.22882	8.98358
gi|116076346	3577000	3031400	6853300			0.176865	0.153434	0.340545	5822400	9096700	11235000			0.169893	0.299184	0.381663	288370	0	605870			0.0169619	0	0.0294369
gi|116076348	41178000	54248000	34714000			2.03605	2.74576	1.72496	37315000	19243000	23418000			1.08882	0.632889	0.795529	4722900	5784000	6279100			0.277801	0.29876	0.305077
gi|116076350	1135900	1106300	0			0.0561646	0.0559953	0	5051200	3341700	4494700			0.14739	0.109906	0.152689	0	1545800	1310400			0	0.079845	0.0636673
gi|116076351	43110000	42087000	38747000			2.13157	2.13023	1.92536	52229000	38861000	36983000			1.524	1.27811	1.25634	0	15439000	13880000			0	0.797469	0.674376
gi|116076352	67028000	139340000	74286000			3.3142	7.05269	3.69132	11572000	9923400	6062600			0.337662	0.326374	0.205952	21412000	51844000	34207000			1.25946	2.67789	1.66199
gi|116076353	160010000	157600000	169030000			7.91169	7.97692	8.39921	228360000	242750000	251570000			6.66336	7.98388	8.54605	335980000	250400000	210350000			19.7624	12.9339	10.2201
gi|116076355	12005000	11478000	6076500			0.593587	0.580959	0.301945	48833000	31611000	29441000			1.42491	1.03966	1.00014	14564000	26788000	26354000			0.856655	1.38368	1.28044
gi|116076356	131340000	126690000	92010000			6.4941	6.41241	4.57204	418380000	390150016	461910016			12.208	12.8318	15.6915	233810000	204110000	225820000			13.7527	10.5429	10.9717
gi|116076357	166280000	182320000	199480000			8.22171	9.22812	9.9123	242540000	260700000	438910016			7.07712	8.57425	14.9101	193690000	273080000	251070000			11.3929	14.1054	12.1985
gi|116076358	190340000	132300000	15745000			9.41136	6.69636	0.78238	928870	0	0			0.0271037	0	0	2089400	0	0			0.122899	0	0
gi|116076359	15417000	8818400	11085000			0.762293	0.446343	0.550821	3924300	1903200	1559500			0.114508	0.062595	0.0529775	0	471110	959330			0	0.0243342	0.0466101
gi|116076360	142000000	123650000	88770000			7.02119	6.25854	4.41104	162850000	121100000	150960000			4.75183	3.9829	5.12824	265730000	230620000	235850000			15.6303	11.9122	11.459
gi|116076361	155930000	123890000	162180000			7.70996	6.27069	8.05883	237490000	218790000	318880000			6.92977	7.19586	10.8326	278240000	209480000	102950000			16.3661	10.8202	5.00194
gi|116076362	105750000	94709000	101100000			5.22881	4.79369	5.02373	62155000	55915000	68557000			1.81363	1.83901	2.32894	3287000	13343000	16602000			0.193342	0.689205	0.806627
gi|116076363	92757000	63972000	79556000			4.58637	3.23794	3.95319	34316000	23492000	20394000			1.00131	0.772636	0.692802	7610700	17283000	19957000			0.447662	0.892717	0.969634
gi|116076364	3421400	4543100	3767700			0.169171	0.229949	0.18722	37640000	37796000	38398000			1.0983	1.24309	1.30441	0	6968100	5365600			0	0.359923	0.260694
gi|116076366	5961500	8668900	7317000			0.294766	0.438776	0.363587	12801000	11864000	9072700			0.373523	0.390199	0.308207	5322400	9162600	6920900			0.313064	0.473275	0.33626
gi|116076368	2052000000	1826200064	2242200064			101.461	92.4331	111.416	1898700032	2190299904	1727600000			55.4025	72.0375	58.688	1443500032	1544300032	2288800000			84.9068	79.7676	111.204
gi|116076369	217830000	238510000	259360000			10.7706	12.0722	12.8878	231890000	273260000	306300000			6.76636	8.98734	10.4053	52378000	73154000	78316000			3.08088	3.77862	3.80507
gi|116076370	195070000	162010000	231640000			9.64523	8.20013	11.5103	273220000	327720000	241820000			7.97234	10.7785	8.21483	64172000	73117000	101580000			3.7746	3.7767	4.93538
gi|116076371	31431000	37693000	42424000			1.55411	1.90783	2.10808	262960000	226720000	189380000			7.67296	7.45667	6.4334	118410000	173320000	131340000			6.96488	8.95248	6.3813
gi|116076375	104350000	84657000	91753000			5.15958	4.28491	4.55927	661960000	580489984	744380032			19.3155	19.0919	25.2872	531960000	239430000	272569984			31.2899	12.3673	13.2431
gi|116076376	26253000	40257000	26074000			1.29808	2.03761	1.29563	0	9678000	0			0	0.318303	0	29363000	0	19531000			1.72713	0	0.948936
gi|116076378	0	5198200	0			0	0.263107	0	-	-	-			-	-	-	-	-	-			-	-	-
gi|116076382	2145900	1907000	1840900			0.106104	0.0965228	0.0914756	5554100	10079000	7812500			0.162064	0.331492	0.265397	4872500	3413000	4780500			0.286601	0.176291	0.232266
gi|116076383	17362000	21156000	26338000			0.858464	1.07081	1.30875	41224000	36303000	43860000			1.20288	1.19398	1.48996	33058000	26069000	40189000			1.94447	1.34654	1.95263
gi|116076384	174940000	138640000	163700000			8.6499	7.01726	8.13436	3217600	2975000	1980900			0.093887	0.0978457	0.0672929	0	462000000	343780000			0	23.8636	16.7029
gi|116076385	322009984	326040000	302929984			15.9218	16.5025	15.0528	657760000	623740032	520590016			19.1929	20.5144	17.6849	192890000	232220000	185600000			11.3458	11.9948	9.01759
gi|116076386	64926000	66520000	84068000			3.21026	3.36691	4.1774	107870000	133140000	134690000			3.14756	4.37889	4.57553	31573000	49895000	68064000			1.85713	2.57722	3.30697
gi|116076388	285600000	595249984	204410000			14.1215	30.1286	10.1573	48187000	32305000	45009000			1.40606	1.06249	1.52899	267820000	317409984	180040000			15.7532	16.3951	8.74745
gi|116076389	1983400	1598400	2795800			0.0980692	0.080903	0.138925	9476200	9853600	10939000			0.276508	0.324078	0.371607	2967400	2985000	3456000			0.174543	0.154184	0.167914
gi|116076390	944280000	1032499968	17755000832			46.6899	52.26	882.258	-	-	-			-	-	-	-	-	-			-	-	-
gi|116076391	39947001856	32013000704	42664001536			1975.18	1620.34	2120	23204999168	26288001024	22866999296			677.103	864.595	776.811	41236000768	48193998848	49985998848			2425.5	2489.36	2428.63
gi|116076394	544940	1139200	781790			0.0269445	0.0576606	0.0388477	2730600	2442100	3419300			0.0796767	0.080319	0.116157	2800400	2026100	1757800			0.16472	0.104654	0.0854047
gi|116076395	71499000	65607000	83793000			3.53527	3.3207	4.16373	96182000	76653000	46368000			2.80651	2.52107	1.57516	59527000	82122000	92372000			3.50138	4.24184	4.488
gi|116076398	17230000	18043000	15411000			0.851937	0.913246	0.765783	41104000	46013000	46543000			1.19938	1.51334	1.58111	27365000	33625000	28902000			1.60961	1.73683	1.40424
gi|116076401	31645000	33236000	33558000			1.56469	1.68224	1.66752	25865000	20192000	13766000			0.75472	0.664101	0.467643	24862000	33433000	26438000			1.46238	1.72691	1.28452
gi|116076404	6980800	6848900	4728300			0.345166	0.346657	0.234952	66803000	64002000	48614000			1.94926	2.10498	1.65146	49534000	48965000	52223000			2.91359	2.52918	2.53731
gi|116076405	6458100	6811000	7513800			0.319321	0.344739	0.373366	4650900	4955600	6058000			0.135709	0.162986	0.205795	2921500	18370000	16623000			0.171843	0.948864	0.807647
gi|116076406	820979968	782800000	953409984			40.5933	39.6214	47.3756	1222599936	1184400000	2435399936			35.6745	38.9541	82.7326	1694200064	2242599936	2291800064			99.653	115.837	111.35
gi|116076407	10563000	11940000	12099000			0.522287	0.604343	0.601207	10441000	6817200	7328400			0.30466	0.224213	0.248952	5715500	5333600	6249600			0.336186	0.275496	0.303644
gi|116076409	28344000	23730000	60044000			1.40147	1.20109	2.98363	47746000	47117000	30637000			1.39319	1.54965	1.04077	39434000	30155000	66577000			2.31951	1.55759	3.23472
gi|116076410	6693900	7439000	7852500			0.33098	0.376525	0.390196	87559000	72590000	60045000			2.5549	2.38744	2.03978	9305400	14397000	9467300			0.547344	0.743647	0.45998
gi|116076416	64938000	48143000	49858000			3.21086	2.43676	2.47748	58961000	49347000	42667000			1.72043	1.62299	1.44943	73455000	58058000	64050000			4.32063	2.99886	3.11194
gi|116076419	7565000	9953500	10026000			0.374051	0.503796	0.498199	29676000	34446000	35201000			0.865922	1.13291	1.19581	9295700	12847000	13249000			0.546774	0.663585	0.643718
gi|116076421	17521000	17485000	21115000			0.866325	0.885003	1.04922	17871000	19074000	39138000			0.521461	0.627331	1.32955	29924000	14825000	17373000			1.76013	0.765754	0.844087
gi|116076422	2578800	2671700	3302900			0.127509	0.135228	0.164123	13221000	9366300	12233000			0.385778	0.308051	0.415565	1519800	1397400	1442300			0.0893947	0.0721798	0.0700758
gi|116076423	14028000	12544000	8877700			0.693614	0.634914	0.441139	141420000	45169000	87651000			4.12652	1.48558	2.97758	26572000	82509000	95961000			1.56297	4.26183	4.66237
gi|116076424	86315000	101480000	104140000			4.26784	5.13641	5.17479	294660000	306369984	319790016			8.59794	10.0763	10.8635	155330000	127070000	178490000			9.13652	6.56353	8.67214
gi|116076427;gi|116076322;gi|116077586	29633000	29832000	17977000			1.4652	1.50995	0.893289	43642000	42802000	46344000			1.27344	1.40773	1.57435	41247000	56169000	61509000			2.42615	2.90129	2.98849
gi|116076429	1733800	1832100	1086400			0.0857277	0.0927317	0.0539839	3199000	2971800	3319300			0.0933442	0.0977405	0.112759	2754700	925270	1234700			0.162032	0.0477929	0.0599893
gi|116076430	11068000	14209000	14421000			0.547257	0.719188	0.716589	60693000	59368000	69416000			1.77097	1.95257	2.35812	46845000	54402000	48431000			2.75543	2.81002	2.35308
gi|116076431	609379968	540240000	573619968			30.1308	27.3442	28.5036	668889984	590099968	672960000			19.5177	19.408	22.861	1382400000	1055699968	855840000			81.3129	54.53	41.582
gi|116076433	84203000	79946000	71541000			4.16342	4.04646	3.55492	143610000	158200000	126080000			4.19042	5.20309	4.28305	72434000	57917000	69151000			4.26057	2.99158	3.35978
gi|116076434	391169984	364840000	393020000			19.3414	18.4664	19.5294	528809984	575969984	683569984			15.4302	18.9433	23.2215	376390016	423540000	416460000			22.1393	21.8771	20.2342
gi|116076436	4044100096	6704699904	5345800192			199.96	339.358	265.636	11416999936	9122400256	10551000064			333.139	300.03	358.426	4711600128	4241200128	4899999744			277.137	219.07	238.072
gi|116076437	71410000	92772000	90056000			3.53087	4.69565	4.47494	213980000	252740000	250600000			6.24376	8.31245	8.5131	53536000	114950000	98920000			3.14899	5.9375	4.80614
gi|116076439	31686000	20019000	16139000			1.56671	1.01326	0.801958	60961000	43727000	37656000			1.77879	1.43815	1.27921	32827000	43987000	15127000			1.93089	2.27206	0.734963
gi|116076440	17444000	16270000	11462000			0.862518	0.823506	0.569555	11635000	9292400	10947000			0.3395	0.305621	0.371879	18970000	15139000	15743000			1.11582	0.781973	0.764892
gi|116076441	14645000	8482800	11176000			0.724122	0.429357	0.555343	57782000	60740000	49969000			1.68603	1.9977	1.69749	17950000	13558000	9900000			1.05582	0.70031	0.481003
gi|116076445	0	0	4352800			0	0	0.216294	-	-	-			-	-	-	-	-	-			-	-	-
gi|116076447	2785100032	1659299968	1423100032			137.709	83.9854	70.7148	3489799936	1816999936	2609900032			101.83	59.7599	88.6605	4090200064	3089700096	4225999872			240.586	159.592	205.325
gi|116076448	10635000	14002000	9188700			0.525847	0.708711	0.456593	12649000	10864000	7459800			0.369088	0.35731	0.253416	8936800	5487500	5623700			0.525663	0.283445	0.273234
gi|116076449	47064000	64348000	45954000			2.32708	3.25697	2.28349	125840000	104350000	114670000			3.67191	3.432	3.89544	86526000	135130000	125280000			5.08947	6.97986	6.08687
gi|116076450	47923000	48572000	42889000			2.36955	2.45847	2.13118	76334000	55477000	49368000			2.22736	1.8246	1.67707	21760000	35154000	30608000			1.27992	1.81581	1.48712
gi|116076451	1066600	1144200	1456300			0.052738	0.0579137	0.0723645	0	258400	0			0	0.0084986	0	722220	661410	0			0.042481	0.0341637	0
gi|116076452	2496400	2207100	3395600			0.123434	0.111712	0.16873	2202500	3772700	3814900			0.0642672	0.124082	0.129595	2923900	3630700	2900200			0.171984	0.187536	0.14091
gi|116076453	509929984	663169984	702790016			25.2135	33.5663	34.9221	515609984	506849984	550630016			15.0451	16.67	18.7054	737969984	783480000	598929984			43.4074	40.469	29.0997
gi|116076454	1353200	1180700	2185400			0.0669089	0.0597611	0.108594	2410500	3576700	3589600			0.0703364	0.117635	0.121942	2311700	1275000	1439800			0.135974	0.0658574	0.0699543
gi|116076455	33710000	38587000	34898000			1.66679	1.95308	1.73411	51520000	40748000	35703000			1.50331	1.34017	1.21286	13012000	21388000	22770000			0.765367	1.10475	1.10631
gi|116076456	0	1566600	1787100			0	0.0792934	0.0888022	-	-	-			-	-	-	-	-	-			-	-	-
gi|116076457	20204000	23818000	19288000			0.998986	1.20555	0.958434	53656000	33557000	35082000			1.56564	1.10367	1.19177	15056000	12033000	15561000			0.885595	0.621539	0.756049
gi|116076459	1712400000	1687800064	2157700096			84.6696	85.428	107.218	1441900032	1728000000	1631500032			42.0735	56.8328	55.4234	1605600000	1654400000	1863900032			94.4415	85.4545	90.5597
gi|116076460	38146000	37664000	33345000			1.88613	1.90636	1.65694	182340000	201070000	211680000			5.32053	6.61306	7.19095	259270000	174470000	212380000			15.2503	9.01188	10.3187
gi|116076462	839820032	807100032	594910016			41.5249	40.8513	29.5615	483310016	288760000	296700000			14.1026	9.49712	10.0792	342990016	326649984	381900000			20.1747	16.8724	18.555
gi|116076463;gi|116077057	12740000	13528000	12755000			0.629929	0.684719	0.633805	-	-	-			-	-	-	-	-	-			-	-	-
gi|116076465	66696000	64481000	63542000			3.29778	3.2637	3.15744	83917000	92303000	97847000			2.44863	3.03578	3.32395	41956000	46136000	54699000			2.46785	2.38306	2.65761
gi|116076466	41901000	33106000	45856000			2.07179	1.67566	2.27862	11297000	6309000	15238000			0.329637	0.207499	0.517648	30573000	15003000	22626000			1.79831	0.774948	1.09931
gi|116076469	15420000	13208000	18846000			0.762442	0.668523	0.93647	30885000	45124000	40527000			0.901199	1.4841	1.37674	39288000	53551000	31442000			2.31092	2.76606	1.52765
gi|116076471	81252000	79812000	103510000			4.0175	4.03968	5.14348	253300000	446960000	303820000			7.39109	14.7002	10.321	93296000	98116000	98196000			5.48768	5.06798	4.77096
gi|116076472	2228500	2308300	2015400			0.110188	0.116835	0.100147	6716200	8140900	6855500			0.195973	0.267749	0.232887	14139000	10623000	15013000			0.831657	0.548709	0.729424
gi|116076476	0	413070	0			0	0.0209075	0	1371600	0	2001600			0.0400222	0	0.0679961	1729100	0	0			0.101706	0	0
gi|116076478	706730	821660	945190			0.0349443	0.0415883	0.0469671	1607000	1927100	2617100			0.046891	0.063381	0.0889051	1348300	1084000	1433400			0.0793071	0.0559917	0.0696434
gi|116076479	0	0	392160			0	0	0.0194867	-	-	-			-	-	-	-	-	-			-	-	-
gi|116076481	66897000	64127000	99994000			3.30772	3.24579	4.96877	101350000	106590000	94575000			2.95731	3.50567	3.21279	178730000	207670000	221980000			10.5129	10.7268	10.7852
gi|116076482	7252500	6283300	5557200			0.3586	0.318029	0.276141	38001000	23799000	31326000			1.10884	0.782733	1.06417	2205900	2094900	2094800			0.129751	0.108208	0.101778
gi|116076484	2623699968	2258299904	2454799872			129.729	114.304	121.981	923660032	1167299968	1083600000			26.9517	38.3917	36.8108	1361600000	870790016	960230016			80.0894	44.9788	46.6539
gi|116076486	548329984	142080000	506350016			27.1122	7.19138	25.1609	-	-	-			-	-	-	-	-	-			-	-	-
gi|116076489	22692000	23474000	16279000			1.12201	1.18814	0.808915	35506000	34926000	27097000			1.03604	1.14869	0.920508	31181000	30811000	23712000			1.83407	1.59148	1.15207
gi|116076491	8709600	7873500	7840100			0.430646	0.398517	0.38958	24793000	19528000	11666000			0.72344	0.642263	0.396304	13324000	12144000	16844000			0.783719	0.627273	0.818385
gi|116076494	6056100	6437200	4913800			0.299444	0.325819	0.24417	6578400	5403000	5062400			0.191952	0.177701	0.171974	8420500	10554000	7936500			0.495294	0.545145	0.385604
gi|116076496	1809100	2266200	0			0.0894509	0.114704	0	6502300	6173500	4965500			0.189732	0.203042	0.168682	2482300	0	2351100			0.146009	0	0.114231
gi|116076497	6580200	6601200	5210500			0.325358	0.33412	0.258913	72265000	73258000	50949000			2.10863	2.40941	1.73078	20592000	23261000	20381000			1.21122	1.2015	0.990234
gi|116076498	429940	514010	319970			0.0212584	0.0260166	0.0158995	30963000	37024000	19446000			0.903475	1.21769	0.660597	0	688380	485770			0	0.0355568	0.0236017
gi|116076500	3366300	1920700	3350400			0.166447	0.0972162	0.166484	9500800	10499000	9060000			0.277226	0.345305	0.307776	1731100	0	1779300			0.101823	0	0.0864493
gi|116076501	49427000	38944000	36623000			2.44392	1.97115	1.81982	3016400	2258700	3786300			0.0880161	0.0742871	0.128624	34322000	32914000	24508000			2.01882	1.7001	1.19075
gi|116076504	22014000	27037000	27387000			1.08848	1.36848	1.36088	56269000	38338000	38534000			1.64188	1.26091	1.30903	6558000	8787400	10906000			0.385742	0.453895	0.52988
gi|116076506	177630000	83135000	171410000			8.78291	4.20788	8.51748	75578000	85318000	87789000			2.2053	2.80605	2.98227	157530000	125070000	151200000			9.26593	6.46023	7.34622
gi|116076508	298840000	271360000	328209984			14.7761	13.7349	16.309	-	-	-			-	-	-	93031000	104620000	69641000			5.47209	5.40393	3.38359
gi|116076509	281160000	221800000	202520000			13.902	11.2264	10.0634	370580000	467289984	355369984			10.8132	15.3689	12.0722	810310016	680390016	486689984			47.6625	35.1441	23.6464
gi|116076512	38931000	38413000	39988000			1.92494	1.94427	1.98703	18543000	20585000	18136000			0.54107	0.677027	0.616095	33623000	36717000	29343000			1.97771	1.89654	1.42566
gi|116076513	2416600	2851100	2599700			0.119489	0.144308	0.129181	24813000	25032000	17401000			0.724023	0.823286	0.591127	2178600	1650500	1185100			0.128145	0.0852531	0.0575794
gi|116076514	18189000	18822000	15228000			0.899355	0.952675	0.75669	10567000	12551000	19194000			0.308336	0.412794	0.652037	13118000	18218000	4969400			0.771602	0.941012	0.241444
gi|116076517	520930	706480	674360			0.0257574	0.0357585	0.0335094	-	-	-			-	-	-	0	299680	314130			0	0.0154793	0.0152624
gi|116076518	370580000	538560000	556019968			18.3233	27.2592	27.629	741340032	683459968	807969984			21.6317	22.4785	27.4474	808680000	629560000	475320000			47.5666	32.5186	23.094
gi|116076519	66366000	61831000	93631000			3.28147	3.12957	4.65259	39122000	43665000	38645000			1.14155	1.43611	1.3128	2379200	7850600	7304500			0.139945	0.405506	0.354897
gi|116076520	7267200	22869000	5088600			0.359327	1.15751	0.252856	-	-	-			-	-	-	645360	1603000	694990			0.0379601	0.0827996	0.0337669
gi|116076521	207900000	226780000	194630000			10.2796	11.4785	9.6713	213700000	200040000	249500000			6.23559	6.57918	8.47573	265080000	465340000	225590000			15.592	24.0362	10.9605
gi|116076522	4439500	5693100	3278100			0.219511	0.288156	0.162891	7473400	8016000	4106500			0.218068	0.263641	0.139501	2973500	1778900	1742200			0.174901	0.0918853	0.0846468
gi|116076523	8846000	8767000	8728700			0.43739	0.443741	0.433735	10172000	11280000	11787000			0.296811	0.370992	0.400414	7212600	7517400	7747900			0.424246	0.388295	0.376441
gi|116076525	1657200	1999000	1474100			0.0819402	0.101179	0.073249	3399600	3250300	3867500			0.0991976	0.1069	0.131382	0	1486900	1241200			0	0.0768027	0.0603051
gi|116076527	263880000	197820000	245530000			13.0475	10.0127	12.2006	397120000	326220000	432880000			11.5876	10.7292	14.7053	156400000	87797000	143910000			9.19946	4.53497	6.99203
gi|116076534	169850000	179510000	125770000			8.39823	9.08589	6.2496	346009984	407720000	389929984			10.0963	13.4096	13.2463	411820000	400320000	340910016			24.2233	20.6777	16.5635
gi|116076536	2949300	3837300	0			0.145828	0.194225	0	7663200	8522400	4827400			0.223606	0.280296	0.163991	0	2269700	2835400			0	0.117237	0.137761
gi|116076539	501569984	336700000	687190016			24.8001	17.0421	34.1469	965539968	1318099968	1376000000			28.1737	43.3514	46.7439	597129984	934960000	741880000			35.1232	48.2934	36.0451
gi|116076540	1314100	1270200	2133800			0.0649756	0.0642911	0.10603	-	-	-			-	-	-	797700	1194100	2040100			0.0469208	0.0616787	0.0991206
gi|116076541	366740000	367790016	311560000			18.1335	18.6157	15.4816	638099968	537830016	659289984			18.6192	17.6889	22.3966	469640000	408249984	445400000			27.6243	21.0873	21.6403
gi|116076543	1627000	2083400	2259900			0.080447	0.105451	0.112296	-	-	-			-	-	-	-	-	-			-	-	-
gi|116076544	30778000	13058000	21499000			1.52182	0.66093	1.0683	101960000	118920000	104950000			2.97511	3.9112	3.56524	11201000	10564000	13041000			0.658844	0.545661	0.633612
gi|116076545	122540000	105600000	90045000			6.05899	5.34494	4.4744	270140000	273080000	291640000			7.88247	8.98142	9.90726	30299000	92935000	65737000			1.78219	4.80036	3.19391
gi|116076547	452360	527150	0			0.0223669	0.0266817	0	9372300	9278900	11862000			0.273476	0.305177	0.402962	12717000	7562700	10117000			0.748015	0.390635	0.491546
gi|116076548	120280000	80237000	106340000			5.94724	4.06119	5.28411	90929000	103970000	103740000			2.65323	3.4195	3.52414	56212000	37979000	61546000			3.30639	1.96173	2.99028
gi|116076549	1497100032	839560000	1328499968			74.0241	42.4943	66.0141	516560000	1057600000	1095399936			15.0728	34.7838	37.2117	1311000064	934680000	1120400000			77.1131	48.2789	54.4359
gi|116076550	9418200	10583000	9454400			0.465683	0.535658	0.469796	14089000	13496000	19782000			0.411106	0.443874	0.672011	6941700	9739400	6701100			0.408311	0.503068	0.325581
gi|116076551	17447000	25788000	26138000			0.862667	1.30526	1.29881	45806000	30383000	28826000			1.33658	0.999276	0.979244	15277000	7404500	7815800			0.898594	0.382464	0.37974
gi|116076553	1579600	1445000	2518200			0.0781033	0.0731386	0.125131	-	-	-			-	-	-	2044800	0	1532000			0.120275	0	0.074434
gi|116076555	1681600	1573700	0			0.0831467	0.0796528	0	1519600	2024800	1503300			0.0443407	0.0665943	0.0510684	1932500	0	3685200			0.11367	0	0.17905
gi|116076556	6744000	8058800	9058800			0.333457	0.407896	0.450138	16004000	10903000	12110000			0.466984	0.358592	0.411387	5543500	5712600	9215200			0.326069	0.295072	0.447731
gi|116076559	808790	384830	728610			0.0399906	0.0194782	0.0362051	-	-	-			-	-	-	529490	0	0			0.0311446	0	0
gi|116076560	2234600	2583900	1746800			0.11049	0.130784	0.0867997	5206700	4190900	4064400			0.151927	0.137836	0.138071	762810	0	745770			0.0448685	0	0.0362341
gi|116076561	22977000	30489000	24486000			1.1361	1.5432	1.21673	15215000	12222000	11595000			0.443961	0.401973	0.393892	6176600	10905000	7266800			0.363308	0.563275	0.353066
gi|116076562	0	1834800	1612300			0	0.0928684	0.0801163	2301300	2129700	4032100			0.0671501	0.0700444	0.136974	1534700	1713700	1430600			0.0902712	0.0885176	0.0695073
gi|116076563	4504400	5570100	4931300			0.22272	0.28193	0.24504	4854600	4013500	3470700			0.141653	0.132001	0.117903	0	2914900	3695700			0	0.150563	0.17956
gi|116076568	7922500	0	14523000			0.391728	0	0.721658	-	-	-			-	-	-	-	-	-			-	-	-
gi|116076573	361600000	156680000	157640000			17.8793	7.93035	7.83324	444360000	412630016	577830016			12.9661	13.5711	19.6294	121980000	95059000	101600000			7.17487	4.91007	4.93635
gi|116076575	6066800	9419400	9031000			0.299973	0.476763	0.448756	8634000	7976000	8532500			0.251933	0.262325	0.289856	7969500	8813400	7618100			0.468767	0.455238	0.370134
gi|116076576	128370000	115190000	132070000			6.34725	5.83034	6.56265	194530000	115910000	117480000			5.67623	3.8122	3.9909	12151000	27172000	26839000			0.714723	1.40351	1.304
gi|116076578	264580000	143920000	169240000			13.0822	7.28451	8.40965	233490000	321780000	378680000			6.81305	10.5831	12.8641	132840000	123120000	141150000			7.81366	6.3595	6.85793
gi|116076579	168060000	215710000	178570000			8.30972	10.9182	8.87326	417569984	447750016	423110016			12.1844	14.7262	14.3734	204640000	300260000	182450000			12.0369	15.5093	8.86454
gi|116076583	3275400	4421100	3133800			0.161952	0.223774	0.155721	3241300	4656000	7164100			0.0945785	0.153133	0.243371	4388000	4075500	4199400			0.258102	0.210511	0.204033
gi|116076584	46429000	29219000	36948000			2.29568	1.47892	1.83597	53228000	53558000	71588000			1.55315	1.76149	2.43191	24887000	39821000	21727000			1.46386	2.05687	1.05563
gi|116076585	1806200	0	2057100			0.0893075	0	0.102219	8773000	6047000	3631300			0.255989	0.198882	0.123358	3363600	0	0			0.197847	0	0
gi|116076586	12449000	9955900	11498000			0.615541	0.503918	0.571343	19075000	34179000	25139000			0.556593	1.12412	0.853993	9685700	15390000	22244000			0.569714	0.794938	1.08075
gi|116076587	62678000	76266000	46595000			3.09911	3.8602	2.31534	94511000	82773000	111720000			2.75775	2.72235	3.79522	71460000	103120000	79157000			4.20328	5.32645	3.84593
gi|116076588	3752900	3022700	3531300			0.185562	0.152994	0.175473	0	635360	0			0	0.0208966	0	0	0	8796600			0	0	0.427393
gi|116076589	23055000	22812000	21562000			1.13995	1.15463	1.07143	6522200	5032700	4567200			0.190313	0.165522	0.155152	0	1440500	3797200			0	0.074406	0.184491
gi|116076590	146660000	150020000	167750000			7.2516	7.59326	8.33561	296710016	242440000	277240000			8.65776	7.97369	9.41808	34031000	43404000	56651000			2.00171	2.24194	2.75245
gi|116076593	13837000	14798000	10561000			0.68417	0.749	0.524783	25881000	26800000	25193000			0.755187	0.881434	0.855828	10574000	9290800	8128600			0.621963	0.479897	0.394937
gi|116076594	20539000	21514000	26706000			1.01555	1.08893	1.32704	120970000	124660000	76830000			3.52981	4.09998	2.60998	17597000	25653000	18584000			1.03506	1.32505	0.902925
gi|116076596	2581500	0	0			0.127642	0	0	9474100	11125000	7812900			0.276447	0.365894	0.265411	2541300	4856100	3653800			0.149479	0.250832	0.177524
gi|116076598	481150	187980	0			0.0237905	0.0095146	0	5131800	4167100	2397700			0.149742	0.137053	0.0814519	0	986400	0			0	0.0509504	0
gi|116076600	2982900	3567500	3289200			0.147489	0.180569	0.163443	3986200	4858300	7878600			0.116314	0.159786	0.267643	7022000	5594900	5054800			0.413035	0.288993	0.245593
gi|116076603	156680000	131930000	103230000			7.74704	6.67763	5.12957	103760000	115450000	201680000			3.02763	3.79707	6.85124	188050000	180760000	142020000			11.0611	9.33678	6.9002
gi|116076604	7510100	6841600	8454500			0.371337	0.346287	0.42011	35975000	37379000	32143000			1.04972	1.22937	1.09193	13338000	9598500	16304000			0.784542	0.49579	0.792148
gi|116076605	89390000	112630000	171910000			4.41989	5.70076	8.54232	152380000	130180000	307020000			4.44632	4.28153	10.4297	183380000	205550000	155590000			10.7864	10.6173	7.55952
gi|116076607	13012000	10098000	11102000			0.643378	0.51111	0.551666	32146000	30034000	39593000			0.937994	0.987798	1.34501	17217000	14400000	17984000			1.01271	0.743802	0.873773
gi|116076611	12225000	8855500	11317000			0.604465	0.448221	0.562349	0	5971700	0			0	0.196405	0	2082800	3129800	2123800			0.12251	0.161663	0.103187
gi|116076612	9639800	10771000	10297000			0.47664	0.545174	0.511665	11588000	12370000	10823000			0.338128	0.406841	0.367667	0	4773300	4423800			0	0.246555	0.214935
gi|116076613	7268700	5429800	8864000			0.359401	0.274829	0.440458	32929000	33424000	17514000			0.960842	1.09929	0.594966	17169000	19201000	27444000			1.00988	0.991787	1.3334
gi|116076614	49055000	36801000	33993000			2.42552	1.86268	1.68914	174840000	147210000	106220000			5.10169	4.84164	3.60838	28168000	28152000	23188000			1.65684	1.45413	1.12662
gi|116076616	55807000	65105000	64750000			2.75938	3.29529	3.21747	102130000	74610000	86672000			2.98007	2.45387	2.94432	42446000	28735000	26336000			2.49668	1.48425	1.27956
gi|116076618	4581500	5463400	5055900			0.226532	0.27653	0.251231	6397700	5954700	8324600			0.18668	0.195846	0.282794	1678600	736020	1377200			0.0987354	0.0380176	0.0669128
gi|116076621	3275700	3819600	5141300			0.161967	0.193329	0.255475	1457100	1482900	2346000			0.042517	0.0487716	0.0796956	0	4172800	3937800			0	0.215537	0.191323
gi|116076623	3667599872	3348499968	3711800064			181.344	169.484	184.442	1775900032	2049500032	2127299968			51.8193	67.4067	72.2662	4450999808	5411899904	4937399808			261.808	279.54	239.889
gi|116076624	42002000	37881000	50632000			2.07679	1.91735	2.51594	74451000	54539000	56282000			2.17242	1.79375	1.91195	24711000	32399000	28958000			1.4535	1.6735	1.40696
gi|116076625	1627600000	1658200064	1711100032			80.4766	83.9297	85.0257	969969984	977809984	880750016			28.3029	32.1595	29.9198	217970000	682329984	754080000			12.821	35.2443	36.6378
gi|116076626	448380000	444380000	537480000			22.1701	22.4923	26.7077	558339968	588409984	640489984			16.2919	19.3524	21.758	903100032	810739968	742280000			53.1204	41.8771	36.0645
gi|116076629	6211700	5110000	5320800			0.307137	0.258643	0.264394	8565900	6037500	5830300			0.249946	0.198569	0.19806	0	2706300	3019900			0	0.139788	0.146725
gi|116076631	388550016	271840000	328340000			19.2118	13.7592	16.3154	402340000	305169984	279120000			11.74	10.0368	9.48194	55173000	49281000	45765000			3.24528	2.54551	2.22354
gi|116076632	0	871760	0			0	0.0441241	0	3128900	3531800	3860200			0.0912988	0.116159	0.131134	-	-	-			-	-	-
gi|116076633	2404400	2442900	2280900			0.118886	0.123647	0.113339	2323800	2956000	4467000			0.0678066	0.0972209	0.151748	1274800	3720900	1308400			0.0749838	0.192195	0.0635701
gi|116076634	9733200	11706000	25556000			0.481258	0.592499	1.26989	20836000	17240000	22390000			0.607978	0.567012	0.760607	0	12373000	13508000			0	0.639101	0.656302
gi|116076635	601280000	454360000	500680000			29.7303	22.9974	24.8791	1931800064	1680800000	1705900032			56.3684	55.2804	57.9509	2091600000	2099200000	1896899968			123.028	108.43	92.1631
gi|116076636	79602000	106340000	97781000			3.93592	5.3824	4.8588	171750000	170340000	165500000			5.01153	5.60237	5.62218	114370000	93278000	118810000			6.72725	4.81808	5.77252
gi|116076637	0	52791000	0			0	2.67201	0	537420	736280	0			0.0156815	0.0242158	0	-	-	-			-	-	-
gi|116076638	59375000	131950000	41198000			2.9358	6.67865	2.04716	4841800	2882100	2571200			0.14128	0.0947903	0.0873459	5003300	12297000	11110000			0.294294	0.635176	0.539792
gi|116076641	1745400	2001500	1649900			0.0863013	0.101306	0.0819846	16971000	13626000	12539000			0.4952	0.44815	0.425961	3853600	2941000	4318600			0.226669	0.151911	0.209824
gi|116076642	816890	1024500	896350			0.0403911	0.051855	0.0445402	1332700	0	0			0.0388871	0	0	-	-	-			-	-	-
gi|116076643	25209000	18458000	16405000			1.24646	0.934251	0.815176	7631200	7069900	6933500			0.222672	0.232524	0.235537	12928000	14409000	19366000			0.760426	0.744267	0.940919
gi|116076644	22070000	14415000	16270000			1.09125	0.729615	0.808467	66409000	71668000	85234000			1.93776	2.35711	2.89547	64908000	26690000	42575000			3.81789	1.37862	2.06856
gi|116076645	16934000	21433000	22865000			0.837301	1.08483	1.13618	30010000	23384000	20542000			0.875667	0.769084	0.697829	26367000	27077000	25588000			1.55091	1.39861	1.24322
gi|116076646	23181000	22276000	18665000			1.14618	1.1275	0.927476	25583000	33631000	16408000			0.746491	1.1061	0.557394	10781000	10236000	15727000			0.634139	0.528719	0.764114
gi|116076647	3575100	3040500	4127500			0.176771	0.153895	0.205098	24306000	26527000	31108000			0.709229	0.872455	1.05677	0	7152300	6475300			0	0.369437	0.31461
gi|116076649	139240000	131660000	212420000			6.88472	6.66397	10.5553	134920000	102750000	107770000			3.93686	3.37938	3.66104	50488000	60100000	68132000			2.96971	3.10434	3.31027
gi|116076651	68633000	44320000	68816000			3.39356	2.24326	3.41951	37921000	45053000	61995000			1.1065	1.48176	2.10602	53285000	36507000	64785000			3.13423	1.88569	3.14765
gi|116076652	2350400000	2031200000	2468800000			116.215	102.809	122.676	6664099840	6432500224	10305000448			194.453	211.561	350.07	9636299776	6388499968	5645700096			566.808	329.985	274.303
gi|116076653	64298000	74575000	57745000			3.17921	3.77461	2.86939	121080000	107460000	61851000			3.53302	3.53429	2.10113	57700000	133750000	67545000			3.39392	6.90857	3.28175
gi|116076656	914000	608750	668130			0.0451927	0.0308119	0.0331998	1906600	1490200	1398100			0.055633	0.0490117	0.0474946	491050	577190	0			0.0288836	0.0298135	0
gi|116076657	11190000	12957000	9586700			0.553289	0.655818	0.47637	14750000	11515000	12137000			0.430393	0.378721	0.412304	9064800	9051900	10092000			0.533192	0.467557	0.490331
gi|116076658	824330	698030	0			0.040759	0.0353308	0	-	-	-			-	-	-	458330	754860	0			0.026959	0.0389907	0
gi|116076660	193780000	249890000	250830000			9.58145	12.6482	12.4639	351929984	365310016	310880000			10.269	12.0148	10.5609	254310000	258290000	311900000			14.9585	13.3414	15.154
gi|116076664	4991400	4879700	7005100			0.2468	0.246986	0.348088	80561000	70001000	86328000			2.3507	2.30229	2.93264	5357700	6822600	5652500			0.31514	0.352407	0.274633
gi|116076665	0	910960	0			0	0.0461082	0	-	-	-			-	-	-	-	-	-			-	-	-
gi|116076666	241080000	361600000	368640000			11.9202	18.3024	18.318	420840000	434680000	572979968			12.2798	14.2963	19.4646	168380000	354240000	241610000			9.90412	18.2975	11.7389
gi|116076671	3435100	4249800	5107500			0.169848	0.215104	0.253795	23578000	21455000	24264000			0.687987	0.705641	0.824269	754110	8006900	2839100			0.0443568	0.41358	0.137941
gi|116076674	20394000	10402000	10425000			1.00838	0.526497	0.518025	52443000	40355000	80306000			1.53024	1.32725	2.72806	41459000	25281000	16216000			2.43862	1.30584	0.787873
gi|116076675	12488000	13096000	10691000			0.617469	0.662854	0.531243	75767000	55944000	79717000			2.21082	1.83996	2.70805	30086000	56366000	27897000			1.76966	2.91147	1.35541
gi|116076677	228670000	189790000	252520000			11.3066	9.60622	12.5479	327260000	356880000	255260000			9.54918	11.7375	8.6714	124110000	147200000	122870000			7.30016	7.60331	5.96978
gi|116076678	2415600	2571200	2147900			0.119439	0.130141	0.106731	17204000	11426000	14169000			0.501999	0.375793	0.481333	2333500	1427900	1324200			0.137257	0.0737552	0.0643378
gi|116076681	14071000	9413500	12135000			0.69574	0.476464	0.602996	189740000	162180000	142400000			5.53646	5.33399	4.83745	9059300	7780600	8363000			0.532869	0.40189	0.406326
gi|116076685	161980000	139400000	156330000			8.0091	7.05573	7.76814	315550016	276080000	183870000			9.20749	9.08009	6.24622	76810000	125900000	164640000			4.51797	6.5031	7.99922
gi|116076686	1219399936	1058899968	1118599936			60.2932	53.5962	55.584	1074400000	1192499968	1132800000			31.3501	39.2205	38.4822	836480000	580200000	1313699968			49.2018	29.969	63.8276
gi|116076687	7519900	7627500	5869800			0.371821	0.386066	0.291674	7722800	7440400	8471600			0.225345	0.24471	0.287787	2831000	0	7536600			0.16652	0	0.366174
gi|116076688	590129984	585560000	799390016			29.179	29.6381	39.7222	608000000	734840000	672689984			17.7409	24.1684	22.8519	1007699968	982430016	1065699968			59.273	50.7454	51.7783
gi|116076689	2438200	1525600	3104000			0.120557	0.0772182	0.15424	-	-	-			-	-	-	-	-	-			-	-	-
gi|116076690	15097000	12690000	15483000			0.746471	0.642304	0.769361	4802100	6013600	2916700			0.140121	0.197783	0.0990828	-	-	-			-	-	-
gi|116076691	97979000	83454000	157340000			4.84457	4.22402	7.81833	104910000	119360000	82216000			3.06119	3.92567	2.79295	33699000	43310000	30737000			1.98218	2.23709	1.49339
gi|116076693	11124000	15950000	11894000			0.550026	0.807309	0.591021	27249000	37382000	20852000			0.795104	1.22947	0.70836	19997000	28068000	26671000			1.17622	1.44979	1.29584
gi|116076695	2060700032	2673299968	2861799936			101.891	135.309	142.205	5107999744	4125100032	3315599872			149.047	135.672	112.634	2714800128	2569600000	3804300032			159.685	132.727	184.836
gi|116076696	130170000	156260000	197360000			6.43625	7.9091	9.80695	226100000	258900000	271889984			6.59741	8.51505	9.23633	68012000	169700000	171030000			4.00047	8.7655	8.30969
gi|116076697	8159400	6789800	5878200			0.403441	0.343666	0.292092	10150000	7147200	6888900			0.296169	0.235067	0.234022	0	1067200	1291900			0	0.055124	0.0627684
gi|116076699	41943000	34278000	43677000			2.07387	1.73498	2.17034	202370000	246420000	278540000			5.90499	8.10459	9.46224	114020000	128990000	96354000			6.70666	6.66271	4.68147
gi|116076700	14557000	9874000	10925000			0.719771	0.499772	0.542871	40460000	19120000	20205000			1.18059	0.628844	0.686381	6391900	17163000	21173000			0.375972	0.886519	1.02871
gi|116076703	14852000	15703000	14620000			0.734357	0.794807	0.726478	13199000	11279000	10277000			0.385136	0.370959	0.349118	8342400	12451000	5755300			0.490701	0.64313	0.279628
gi|116076705	20245000	15759000	20887000			1.00101	0.797641	1.03789	70693000	53431000	29033000			2.06276	1.75731	0.986276	37432000	45980000	33497000			2.20175	2.375	1.62749
gi|116076706	1102500	1304700	984600			0.0545131	0.0660374	0.0489254	6260200	6992500	5731500			0.182668	0.229979	0.194704	2018800	3570900	4864900			0.118746	0.184447	0.236367
gi|116076709	2473200	2943000	3788700			0.122287	0.14896	0.188263	5704400	0	0			0.16645	0	0	3675400	0	3147500			0.216187	0	0.152925
gi|116076710	4650700	4585100	0			0.229954	0.232075	0	0	3755900	3086400			0	0.123529	0.104848	4232400	6718500	4245500			0.24895	0.34703	0.206272
gi|116076711	73145000	81279000	94567000			3.61665	4.11393	4.6991	182290000	193610000	231540000			5.31907	6.3677	7.86561	285500000	268140000	290590016			16.7931	13.8502	14.1186
gi|116076712	12252000	11281000	12286000			0.6058	0.570987	0.6105	16708000	10931000	8447900			0.487526	0.359513	0.286982	14798000	17138000	12927000			0.870419	0.885227	0.628073
gi|116076713	70666000	38676000	59000000			3.49408	1.95758	2.93175	63165000	60272000	57814000			1.8431	1.98231	1.96399	23713000	30570000	29442000			1.3948	1.57903	1.43047
gi|116076714	3038600	3055700	3090100			0.150244	0.154664	0.153549	3677200	2669200	3108800			0.107298	0.0877882	0.105609	0	584300	831770			0	0.0301808	0.0404125
gi|116076715	29175000	31974000	36205000			1.44256	1.61836	1.79905	257390000	250310000	201390000			7.51043	8.23253	6.84139	115680000	131120000	150100000			6.80431	6.77273	7.29278
gi|116076717	9842900	7385300	10782000			0.486682	0.373807	0.535765	6778100	7868600	6449800			0.197779	0.258793	0.219105	4365000	4428700	5373500			0.25675	0.228755	0.261078
gi|116076719	48059000	42073000	39474000			2.37628	2.12952	1.96149	77768000	53893000	63012000			2.26921	1.7725	2.14057	63349000	72933000	52374000			3.72619	3.7672	2.54465
gi|116076721	6178200	6436800	4384400			0.305481	0.325798	0.217864	4082700	4726000	5480500			0.11913	0.155435	0.186177	-	-	-			-	-	-
gi|116076723	270840000	277280000	254900000			13.3917	14.0345	12.6662	308529984	372600000	387110016			9.00265	12.2546	13.1505	438100000	368849984	370390016			25.7691	19.0522	17.9958
gi|116076724;gi|116077123	24946000	17737000	26612000			1.23345	0.897758	1.32237	17421000	14511000	22930000			0.508331	0.477257	0.778952	48894000	40041000	73504000			2.87595	2.06823	3.57128
gi|116076725	14015000	12255000	19389000			0.692971	0.620286	0.963453	4402700	4386900	4523400			0.128467	0.144282	0.153664	-	-	-			-	-	-
gi|116076727	2981200	3011200	2549200			0.147405	0.152412	0.126671	9538800	8399000	7676300			0.278334	0.276237	0.26077	644650	922770	741170			0.0379184	0.0476637	0.0360106
gi|116076730	10286000	9747800	9971800			0.508591	0.493385	0.495505	15782000	12891000	7142900			0.460506	0.423976	0.24265	2376100	7121200	8028000			0.139762	0.367831	0.39005
gi|116076732	17046000	18297000	13334000			0.842839	0.926102	0.662575	32095000	20429000	22189000			0.936506	0.671896	0.753779	14420000	19082000	15953000			0.848185	0.98564	0.775095
gi|116076733	7405800	8189000	6625900			0.36618	0.414486	0.329245	11832000	10298000	9377400			0.345248	0.338694	0.318558	6497000	6041500	8431600			0.382154	0.312061	0.409659
gi|116076736	121770000	178390000	174310000			6.02092	9.0292	8.66158	271820000	272860000	280880000			7.93149	8.97418	9.54173	254190000	287440000	223860000			14.9515	14.8471	10.8765
gi|116076737	74396000	60680000	80825000			3.67851	3.07132	4.01625	195210000	284870016	253730000			5.69607	9.36918	8.61942	262370000	211330000	145100000			15.4326	10.9158	7.04985
gi|116076740	226220	777590	0			0.0111854	0.0393577	0	0	662900	778480			0	0.0218023	0.0264456	-	-	-			-	-	-
gi|116076744	7521900	5816900	11614000			0.37192	0.294422	0.577108	7103900	8880500	14061000			0.207286	0.292074	0.477664	48877000	17802000	44766000			2.87495	0.919525	2.17501
gi|116076747	2302099968	2891200000	2453199872			113.827	146.338	121.901	2817999872	2886599936	2690500096			82.227	94.9383	91.3986	7889600000	4880500224	4687000064			464.067	252.092	227.723
gi|116076748	44241000	47211000	32142000			2.1875	2.38958	1.59716	87071000	78126000	47151000			2.54066	2.56951	1.60176	52735000	52054000	37487000			3.10188	2.68874	1.82135
gi|116076749	47490000	44675000	34034000			2.34814	2.26122	1.69117	119390000	158600000	184810000			3.4837	5.21625	6.27815	147980000	207950000	123330000			8.70419	10.7412	5.99213
gi|116076751	0	0	1834700			0	0	0.0911675	1500500	0	1036300			0.0437834	0	0.035204	3437100	0	0			0.20217	0	0
gi|116076752	14204000	19283000	16652000			0.702316	0.976009	0.827449	87385000	64599000	87497000			2.54982	2.12462	2.97235	20624000	21424000	16586000			1.21311	1.10661	0.80585
gi|116076753	4137700	3460700	4878700			0.204588	0.175163	0.242426	3266100	2881300	3913400			0.0953022	0.094764	0.132942	0	3502500	2942300			0	0.180914	0.142955
gi|116076754	14197000	15199000	11520000			0.70197	0.769297	0.572437	26298000	22652000	17251000			0.767354	0.745009	0.586031	27549000	20375000	24267000			1.62043	1.05243	1.17904
gi|116076755	985689984	1036200000	889209984			48.7374	52.4472	44.1854	904860032	1020499968	1875500032			26.4031	33.5636	63.7123	810179968	911630016	703580032			47.6548	47.0883	34.1842
gi|116076756	121020000	113610000	92984000			5.98383	5.75037	4.62044	58585000	48727000	35001000			1.70946	1.6026	1.18901	4864600	13884000	21767000			0.286136	0.717149	1.05757
gi|116076757	110750000	112690000	111110000			5.47603	5.7038	5.52113	135660000	93122000	105430000			3.95845	3.06272	3.58155	118290000	137440000	147460000			6.95783	7.09917	7.16451
gi|116076758	2958300	3765400	2756700			0.146273	0.190586	0.136982	28073000	29548000	26011000			0.819147	0.971814	0.883616	22519000	22278000	20701000			1.32457	1.15072	1.00578
gi|116076760	44956000	49045000	64014000			2.22285	2.48241	3.1809	139910000	108460000	105150000			4.08246	3.56718	3.57204	89504000	92028000	90291000			5.26463	4.75351	4.38689
gi|116076761	869720000	975820032	686070016			43.0033	49.3911	34.0913	1095699968	1073600000	934780032			31.9716	35.31	31.7553	1489200000	1356300032	1319800064			87.5948	70.0568	64.124
gi|116076762	1142800	1304700	1984900			0.0565057	0.0660374	0.098631	-	-	-			-	-	-	-	-	-			-	-	-
gi|116076764	1056400	925320	997060			0.0522337	0.046835	0.0495446	2065200	1268700	1050600			0.0602609	0.0417267	0.0356898	0	281720	0			0	0.0145517	0
gi|116076765	70462000	67272000	89460000			3.48399	3.40497	4.44533	50304000	41695000	51085000			1.46783	1.37132	1.7354	2536000	24607000	23742000			0.149168	1.27102	1.15353
gi|116076766	42243000	87942000	18820000			2.0887	4.45118	0.935179	-	-	-			-	-	-	1584200	3306800	2869100			0.0931828	0.170806	0.139399
gi|116076768	1950000000	1484600064	1617400064			96.4177	75.143	80.3697	805020032	1453400064	1722099968			23.4898	47.8014	58.5012	383460000	819740032	787089984			22.5551	42.3419	38.2417
gi|116076769	55673000	68932000	61636000			2.75275	3.48899	3.06273	169210000	132860000	156990000			4.93741	4.36968	5.33308	85663000	64228000	87263000			5.0387	3.31756	4.23977
gi|116076770	94392000	86807000	123920000			4.66721	4.39373	6.15767	169800000	143040000	201560000			4.95463	4.70449	6.84717	117710000	97586000	136120000			6.92371	5.0406	6.61355
gi|116076775	258840000	203110000	124450000			12.7983	10.2804	6.184	238510000	367449984	324620000			6.95953	12.0852	11.0276	475329984	499870016	480390016			27.9589	25.8197	23.3403
gi|116076777	184670000	177500000	88035000			9.131	8.98416	4.37452	546889984	632019968	810659968			15.9578	20.7867	27.5388	746979968	590840000	394880000			43.9374	30.5186	19.1857
gi|116076779	157870000	170440000	107600000			7.80588	8.62682	5.34672	294849984	297780000	278870016			8.60348	9.79378	9.47345	558449984	493510016	452960000			32.8481	25.4912	22.0076
gi|116076780	68492000	56958000	64565000			3.38659	2.88293	3.20828	42822000	39906000	49956000			1.24951	1.31248	1.69705	0	18254000	17846000			0	0.942872	0.867068
gi|116076781	2011299968	2098800000	1807399936			99.4487	106.231	89.8109	2134099968	2008199936	2715699968			62.2713	66.0483	92.2546	1175000064	1379900032	1686200064			69.1136	71.2758	81.926
gi|116076782	4223000	4369500	4593100			0.208806	0.221162	0.228234	9685400	7365800	5701200			0.282612	0.242256	0.193675	4940100	6447900	5381500			0.290577	0.333053	0.261466
gi|116076786	3781300	5370200	3575600			0.186966	0.271813	0.177674	11381000	14254000	9674100			0.332088	0.468804	0.328637	8951400	9753900	12442000			0.526522	0.503817	0.604509
gi|116076788	59451000	47900000	94804000			2.93955	2.42446	4.71087	94361000	117510000	107250000			2.75338	3.86482	3.64337	25128000	22885000	48842000			1.47803	1.18208	2.37304
gi|116076789	6127800	5911900	7249900			0.302989	0.299231	0.360252	29610000	31669000	35767000			0.863996	1.04157	1.21504	15430000	12390000	7715500			0.907594	0.639979	0.374866
gi|116076791	10302000	10053000	5428900			0.509382	0.508832	0.269766	27347000	17034000	13886000			0.797963	0.560237	0.471719	2603000	4088000	5733200			0.153109	0.211157	0.278554
gi|116076792	569560000	669990016	713539968			28.1619	33.9115	35.4563	1188700032	1209900032	799059968			34.6853	39.7928	27.1447	545190016	598099968	474480000			32.0681	30.8936	23.0532
gi|116076793	2896800	3396200	3782200			0.143232	0.171899	0.18794	12472000	12366000	8885300			0.363923	0.406709	0.301841	28676000	9584200	20755000			1.68672	0.495052	1.00841
gi|116076794	2016500	1915900	3328900			0.0997058	0.0969732	0.165415	3589600	2555400	1603800			0.104742	0.0840454	0.0544825	984110	968540	1273300			0.0578854	0.0500279	0.0618647
gi|116076797	2444600	2534100	3453400			0.120873	0.128263	0.171602	12137000	10791000	10189000			0.354148	0.354909	0.346129	6899100	4634200	3330400			0.405806	0.23937	0.161811
gi|116076798	4706100224	4528900096	5109899776			232.693	229.23	253.914	10631999488	11799000064	12764999680			310.233	388.061	433.638	6300100096	4750199808	4397700096			370.572	245.362	213.667
gi|116076799	287190	489940	353810			0.0142001	0.0247983	0.0175811	-	-	-			-	-	-	221260	213600	169300			0.0130145	0.0110331	0.00822563
gi|116076800	10505000	10095000	9699700			0.51942	0.510958	0.481985	13955000	8652400	9270100			0.407196	0.284572	0.314913	1623000	2291500	2294200			0.095465	0.118363	0.111466
gi|116076803	68925000	58733000	47897000			3.408	2.97277	2.38003	50184000	51417000	30307000			1.46433	1.69107	1.02955	27389000	15417000	28882000			1.61102	0.796333	1.40326
gi|116076804	45532000	43455000	37093000			2.25133	2.19947	1.84318	54211000	35808000	42727000			1.58183	1.1777	1.45147	30951000	28783000	49229000			1.82054	1.48673	2.39185
gi|116076805	261050000	280660000	282510016			12.9076	14.2056	14.0381	429240000	416540000	506729984			12.5249	13.6997	17.214	527830016	527870016	492360000			31.047	27.266	23.9219
gi|116076808	165240000	142490000	126640000			8.17029	7.21213	6.29283	164310000	116750000	114680000			4.79443	3.83983	3.89578	75602000	73091000	91252000			4.44691	3.77536	4.43358
gi|116076809	302300000	297070016	143400000			14.9472	15.0362	7.12564	608449984	552120000	774040000			17.7541	18.1589	26.2948	1302700032	852929984	649299968			76.6249	44.0563	31.547
gi|116076811	278560000	246720000	243240000			13.7734	12.4877	12.0868	186920000	180030000	180040000			5.45417	5.92107	6.11611	166170000	189510000	199720000			9.77413	9.78874	9.70362
gi|116076812	79039000	97900000	91634000			3.90808	4.95521	4.55336	99374000	106490000	112220000			2.89965	3.50238	3.81221	45456000	51308000	60249000			2.67373	2.65021	2.92727
gi|116076813	14986000	7653700	10443000			0.740982	0.387392	0.51892	43952000	44322000	61065000			1.28248	1.45772	2.07443	33508000	24086000	29904000			1.97094	1.24411	1.45292
gi|116076814	206570000	239680000	223250000			10.2138	12.1314	11.0934	201890000	205030000	258790000			5.89099	6.7433	8.79132	477209984	631889984	569260032			28.0695	32.6389	27.6581
gi|116076815	162730000	157670000	214580000			8.04618	7.98046	10.6626	324540000	404510016	459369984			9.46981	13.3041	15.6052	263320000	120780000	246580000			15.4885	6.23864	11.9804
gi|116076816	33761000	34331000	34651000			1.66931	1.73766	1.72183	40288000	29154000	28777000			1.17557	0.958855	0.977579	1707900	7482800	10548000			0.100459	0.386508	0.512487
gi|116076818	14958000	9835100	11772000			0.739598	0.497803	0.584959	45991000	39905000	33628000			1.34198	1.31245	1.14237	4838900	8576800	7236200			0.284624	0.443017	0.351579
gi|116076819	1955300	1141100	1887700			0.0966798	0.0577567	0.0938011	2361700	2368000	2206000			0.0689125	0.0778819	0.0749397	0	143060	118980			0	0.00738946	0.00578078
gi|116076820	147240000	135710000	101130000			7.28028	6.86896	5.02522	285540000	185200000	173630000			8.33183	6.0911	5.89836	153540000	169480000	167010000			9.03123	8.75413	8.11437
gi|116076825	190710000	163130000	266540000			9.42965	8.25682	13.2446	270470016	356780000	350550016			7.8921	11.7343	11.9085	465400000	633299968	452920000			27.3749	32.7118	22.0056
gi|116076828	0	0	1221600			0	0	0.0607021	2311800	3139000	0			0.0674565	0.10324	0	-	-	-			-	-	-
gi|116076829	9893300	11801000	9190800			0.489174	0.597307	0.456697	21634000	20148000	22953000			0.631263	0.662654	0.779733	0	4586600	0			0	0.236911	0
gi|116076830	0	0	23778000			0	0	1.18154	8121200	6067900	3209500			0.23697	0.199569	0.109029	9994200	28898000	67273000			0.58786	1.49267	3.26854
gi|116076832	10003000	15643000	14644000			0.494598	0.79177	0.72767	22883000	16476000	8113800			0.667707	0.541885	0.275633	5032700	2485100	4871700			0.296024	0.128363	0.236697
gi|116076835	31795000	29332000	28832000			1.5721	1.48464	1.43268	21240000	18846000	11269000			0.619766	0.619832	0.382818	13646000	16270000	19397000			0.802659	0.840393	0.942425
gi|116076836	30644000	38119000	36092000			1.51519	1.92939	1.79344	93194000	93646000	101100000			2.71933	3.07995	3.43445	9845100	22028000	0			0.579089	1.13781	0
gi|116076837	2751200	2536300	1818500			0.136033	0.128375	0.0903625	4810100	4700700	3835700			0.140355	0.154603	0.130302	1633500	2591600	1490900			0.0960826	0.133864	0.0724371
gi|116076841	443600000	562200000	480160000			21.9338	28.4557	23.8595	354800000	319510016	338990016			10.3528	10.5085	11.5158	32359000	109420000	113040000			1.90336	5.65186	5.49218
gi|116076842	19090000	9644900	21437000			0.943905	0.488176	1.06522	27095000	24156000	23385000			0.79061	0.794475	0.794408	16216000	33612000	11587000			0.953826	1.73616	0.562968
gi|116076844	4534300	5043400	5120000			0.224198	0.255272	0.254416	23071000	23746000	27845000			0.673193	0.78099	0.945918	3820400	3000100	4895500			0.224716	0.154964	0.237853
gi|116076846	13952000	12872000	4112200			0.689856	0.651516	0.204338	71209000	49142000	47266000			2.07782	1.61625	1.60567	12670000	17910000	18665000			0.74525	0.925103	0.90686
gi|116076848	6783400	6223400	5757000			0.335405	0.314997	0.286069	32912000	20361000	24332000			0.960345	0.66966	0.826579	826720	6469500	6067700			0.0486277	0.334168	0.294806
gi|116076849	1704700	1734900	1801100			0.0842889	0.0878119	0.0894979	5184100	5935600	3300400			0.151268	0.195218	0.112117	486420	0	1108800			0.0286113	0	0.0538723
gi|116076851	338809984	173650000	366209984			16.7525	8.78929	18.1972	135240000	116300000	97496000			3.94619	3.82503	3.31202	34286000	29330000	30948000			2.0167	1.51498	1.50364
gi|116076853	40518000	43182000	43457000			2.00341	2.18566	2.15941	91516000	119770000	152380000			2.67036	3.93915	5.17648	141150000	104220000	113110000			8.30245	5.38326	5.49558
gi|116076856	2592400	3050800	2138000			0.128181	0.154416	0.106239	938090	0	708050			0.0273727	0	0.0240531	0	0	430910			0	0	0.0209363
gi|116076857	6322500	8407400	7804100			0.312616	0.42554	0.387791	12915000	8308700	9035700			0.376849	0.273268	0.30695	0	10594000	0			0	0.547211	0
gi|116076858	21569000	25197000	23553000			1.06648	1.27535	1.17036	31916000	39122000	34664000			0.931283	1.2867	1.17757	50057000	54727000	37948000			2.94436	2.82681	1.84375
gi|116076859	427660000	508089984	470100000			21.1456	25.717	23.3596	839329984	845990016	814259968			24.491	27.824	27.6611	464790016	616929984	542280000			27.339	31.8662	26.3473
gi|116076861	1896000	1942600	2096900			0.0937477	0.0983246	0.104196	8298400	6772400	6388100			0.242141	0.22274	0.217009	2478000	4172600	4333400			0.145756	0.215527	0.210543
gi|116076866	102420000	74852000	107550000			5.06415	3.78863	5.34423	119990000	134210000	125180000			3.50121	4.41408	4.25247	169620000	166270000	222910000			9.97706	8.58833	10.8303
gi|116076868	17932000	15774000	21928000			0.886647	0.798401	1.08962	13468000	14166000	10510000			0.392985	0.46591	0.357034	3588600	3473800	5442700			0.211082	0.179432	0.26444
gi|116076869	547769984	554680000	360220000			27.0845	28.0751	17.8996	1397500032	1238099968	1281600000			40.7779	40.7203	43.537	1002400000	1101799936	1199299968			58.9612	56.9112	58.2694
gi|116076874	33105000	37735000	39023000			1.63688	1.90996	1.93908	56729000	58597000	65727000			1.65531	1.92722	2.2328	13843000	19176000	17272000			0.814246	0.990496	0.83918
gi|116076875	2323900	2445400	2275400			0.114905	0.123774	0.113066	4343700	3516800	3808000			0.126746	0.115665	0.129361	2362300	4898000	2959900			0.138951	0.252996	0.14381
gi|116076879	50995000	45682000	53794000			2.52145	2.31219	2.67306	60319000	69355000	54096000			1.76006	2.28104	1.83769	1083900	17929000	17621000			0.0637551	0.926085	0.856136
gi|116076880	23104000	16013000	17537000			1.14238	0.810498	0.871425	15005000	19102000	21808000			0.437834	0.628252	0.740836	17910000	30307000	36616000			1.05347	1.56544	1.77903
gi|116076881	31439000	40004000	35712000			1.5545	2.0248	1.77455	13149000	15999000	17614000			0.383677	0.526196	0.598363	49621000	45976000	90931000			2.91871	2.37479	4.41799
gi|116076885	2291500032	3316199936	2282099968			113.303	167.849	113.399	2354599936	2047399936	1818700032			68.7053	67.3376	61.7828	3048900096	5764400128	3904300032			179.337	297.748	189.695
gi|116076886	20015000	22304000	18907000			0.989641	1.12892	0.939502	28383000	21221000	17417000			0.828193	0.697944	0.59167	8701900	9312400	12784000			0.511846	0.481012	0.621125
gi|116076887	274060000	216570000	355780000			13.5509	10.9617	17.6789	534769984	556609984	354960000			15.6042	18.3065	12.0583	1348499968	240820000	459689984			79.3189	12.439	22.3346
gi|116076888	687960000	426420000	519169984			34.0162	21.5832	25.7979	747449984	682849984	605470016			21.81	22.4585	20.5683	426310016	198170000	165970000			25.0756	10.2361	8.06384
gi|116076889	2235000	1386500	2427700			0.11051	0.0701777	0.120634	2453300	2151400	2747900			0.0715853	0.0707581	0.0933485	0	965510	0			0	0.0498714	0
gi|116076890	11963000	15559000	23250000			0.59151	0.787518	1.15531	44046000	44823000	57475000			1.28523	1.4742	1.95247	22364000	16831000	18521000			1.31545	0.86937	0.899864
gi|116076891	1414400	2075300	1242700			0.069935	0.105041	0.0617506	20208000	16526000	9870100			0.589653	0.543529	0.335296	0	669820	1786600			0	0.0345981	0.086804
gi|116076892	12273000	14782000	14134000			0.606838	0.748191	0.702328	18357000	20865000	15063000			0.535642	0.686236	0.511703	-	-	-			-	-	-
gi|116076897	29790000	47527000	35535000			1.47297	2.40558	1.76576	98548000	135180000	119460000			2.87555	4.44598	4.05816	125520000	117880000	79943000			7.3831	6.08884	3.88412
gi|116076898	16177000	19968000	21706000			0.799871	1.01068	1.07859	113760000	90024000	112830000			3.31942	2.96083	3.83293	26712000	29506000	37370000			1.5712	1.52407	1.81566
gi|116076899	13232000	10089000	11869000			0.654256	0.510654	0.589779	35233000	29580000	32693000			1.02807	0.972866	1.11061	12430000	9438900	19477000			0.731133	0.487546	0.946312
gi|116076900	61044000	77579000	64828000			3.01832	3.92666	3.22135	84741000	91034000	95414000			2.47267	2.99405	3.24129	30695000	30600000	49630000			1.80548	1.58058	2.41133
gi|116076901	279900000	318990016	335590016			13.8396	16.1457	16.6757	432430016	465200000	621379968			12.618	15.3001	21.1088	124340000	237690000	237430000			7.31369	12.2774	11.5358
gi|116076902	2138700	2165000	2173600			0.105748	0.109581	0.108008	1224700	1775400	1050800			0.0357358	0.0583917	0.0356966	0	0	181930			0	0	0.00883928
gi|116076906	29502000	34638000	33075000			1.45873	1.7532	1.64352	161190000	176150000	186470000			4.70339	5.79346	6.33454	73339000	71931000	68898000			4.31381	3.71544	3.34749
gi|116076907	21139000	18982000	13832000			1.04522	0.960773	0.687321	20980000	16167000	13080000			0.612179	0.531722	0.444339	7698000	9399900	7232900			0.452797	0.485532	0.351419
gi|116076908	39491000	19988000	13790000			1.95263	1.01169	0.685234	54716000	42554000	48099000			1.59657	1.39957	1.63396	42240000	28976000	38036000			2.48456	1.49669	1.84802
gi|116076909	13831000	13878000	13963000			0.683874	0.702435	0.693831	12619000	14048000	20810000			0.368212	0.462029	0.706933	8038500	8336300	5731400			0.472825	0.430594	0.278467
gi|116076910	129390000	101390000	79162000			6.39769	5.13185	3.93361	69630000	63060000	57082000			2.03175	2.074	1.93912	95972000	86092000	90229000			5.64508	4.4469	4.38388
gi|116076911	64904000	78186000	52798000			3.20918	3.95738	2.62357	175160000	221520000	228800000			5.11103	7.28564	7.77253	213710000	222350000	162360000			12.5704	11.485	7.88845
gi|116076912	596550016	620259968	399169984			29.4964	31.3944	19.835	1884099968	1445900032	2033799936			54.9765	47.5547	69.0899	1223699968	1399200000	1052400000			71.9781	72.2727	51.1321
gi|116076914	106560000	107140000	88126000			5.26886	5.42289	4.37904	297720000	285340000	266900000			8.68723	9.38464	9.06682	57551000	67831000	67773000			3.38515	3.50367	3.29283
gi|116076915	2630700	3025100	2100500			0.130075	0.153115	0.104375	39032000	24173000	38935000			1.13892	0.795034	1.32266	1844500	1756400	2456600			0.108494	0.0907231	0.119357
gi|116076916	80181000	24907000	230190000			3.96455	1.26067	11.4383	-	-	-			-	-	-	-	-	-			-	-	-
gi|116076918	331040000	367900000	288440000			16.3683	18.6212	14.3328	311400000	287150016	275340000			9.0864	9.44417	9.35353	236580000	299910016	208370000			13.9157	15.4912	10.1239
gi|116076919	118600000	118720000	117070000			5.86417	6.00901	5.81729	166640000	146170000	183170000			4.86242	4.80743	6.22244	203230000	160740000	147890000			11.954	8.30269	7.1854
gi|116076920	7864100	11824000	9346700			0.38884	0.598471	0.464444	11466000	14481000	41924000			0.334569	0.47627	1.42419	14118000	12301000	7578000			0.830422	0.635382	0.368186
gi|116076921	221120	202720	217170			0.0109333	0.0102607	0.0107913	1828000	3117200	3618200			0.0533396	0.102523	0.122913	689050	770140	645420			0.04053	0.03978	0.0313585
gi|116076924	171600000	184570000	116890000			8.48476	9.34201	5.80834	416860000	419969984	661939968			12.1636	13.8125	22.4867	556940032	506649984	476680000			32.7593	26.1699	23.16
gi|116076925	4649900	11796000	7553400			0.229914	0.597054	0.375334	29514000	48439000	53358000			0.861195	1.59313	1.81262	2696500	0	0			0.158608	0	0
gi|116076929	687020	647300	730040			0.0339697	0.0327631	0.0362762	4921200	3807500	6516100			0.143597	0.125226	0.221357	1698500	1399900	1646800			0.0999059	0.0723089	0.0800117
gi|116076933	18417000	25708000	18425000			0.910628	1.30121	0.915551	-	-	-			-	-	-	1155500	1236500	1534200			0.0679666	0.0638688	0.0745409
gi|116076935	1689100	786980	1785600			0.0835175	0.039833	0.0887277	6953000	4457600	8037300			0.202883	0.146607	0.273034	0	0	3615800			0	0	0.175678
gi|116076936	29494000	32435000	22367000			1.45833	1.6417	1.11143	36191000	29707000	43250000			1.05602	0.977043	1.46924	3848200	5128500	4790300			0.226351	0.264902	0.232742
gi|116076938	3824000	4927800	4035400			0.189078	0.24942	0.200522	11203000	11825000	5363500			0.326894	0.388916	0.182203	1549800	1185500	2239100			0.0911593	0.0612345	0.108789
gi|116076939	322380000	287260000	235370000			15.9401	14.5397	11.6957	418540000	439609984	606590016			12.2127	14.4585	20.6064	746200000	644049984	554819968			43.8915	33.267	26.9566
gi|116076943	148100000	200070000	165720000			7.3228	10.1265	8.23474	15135000	9718600	11443000			0.441627	0.319638	0.388728	55048000	65290000	63948000			3.23793	3.37242	3.10699
gi|116076944	101050000	86714000	93516000			4.99642	4.38903	4.64687	82199000	101520000	70356000			2.3985	3.33892	2.39005	92324000	59555000	93263000			5.4305	3.07619	4.53129
gi|116076948	24294000	27745000	27759000			1.20122	1.40431	1.37936	110020000	82548000	101570000			3.21029	2.71495	3.45042	29608000	48980000	60800000			1.74154	2.52996	2.95404
gi|116076950	17258000	19557000	24688000			0.853321	0.989877	1.22676	27513000	24110000	25418000			0.802807	0.792962	0.863471	11612000	7046100	5891200			0.683019	0.363951	0.286231
gi|116076951	4003500	4087800	3521400			0.197953	0.206904	0.174981	22169000	12311000	14724000			0.646873	0.404901	0.500187	9013100	7469000	10434000			0.530151	0.385795	0.506948
gi|116076952	80619000	47556000	64618000			3.9862	2.40705	3.21091	74752000	85069000	86284000			2.1812	2.79786	2.93114	1973600	12762000	9245300			0.116087	0.659194	0.449193
gi|116076953	120910000	88613000	136210000			5.97839	4.48514	6.76837	335340000	220870000	383169984			9.78495	7.26427	13.0166	206870000	206370000	163130000			12.1681	10.6596	7.92586
gi|116076955	877540	800680	1354800			0.0433899	0.0405264	0.0673209	-	-	-			-	-	-	-	-	-			-	-	-
gi|116076957	668520	619640	1870400			0.033055	0.0313631	0.0929414	7415600	8281300	9865000			0.216381	0.272366	0.335122	6369900	5855100	7470700			0.374678	0.302433	0.362973
gi|116076960	2298300	2555700	2383700			0.113639	0.129357	0.118448	1953300	2415800	3315400			0.0569957	0.079454	0.112627	1476700	2100100	2134000			0.0868596	0.108476	0.103683
gi|116076961	174650000	210930000	247020000			8.63557	10.6762	12.2746	312830016	291769984	305830016			9.12813	9.59612	10.3893	289769984	380390016	260920000			17.0443	19.6482	12.6771
gi|116076962	36501000	40935000	50506000			1.80479	2.07192	2.50968	37209000	59951000	53212000			1.08573	1.97175	1.80766	55896000	78697000	55866000			3.28781	4.06493	2.71431
gi|116076963	1506500	1579100	1506000			0.0744889	0.0799261	0.0748342	27264000	31192000	19202000			0.795541	1.02588	0.652308	1632500	3084800	3007800			0.0960238	0.159339	0.146137
gi|116076965	1222599936	1408800000	1560800000			60.4514	71.3064	77.5572	111660000	106760000	108020000			3.25815	3.51126	3.66953	314240000	271920000	210580000			18.4836	14.0455	10.2313
gi|116076966	964920	1119900	1002600			0.0477105	0.0566837	0.0498199	4625000	3001300	3294400			0.134954	0.0987107	0.111914	930320	0	2192600			0.0547215	0	0.10653
gi|116076968	11882000	25439000	5241500			0.587505	1.28759	0.260454	1187100	640000	915280			0.0346386	0.0210492	0.0310928	1600300	6892800	6159100			0.0941298	0.356033	0.299247
gi|116076969	60426000	56410000	39421000			2.98776	2.85519	1.95886	143120000	200680000	155330000			4.17613	6.60023	5.27669	297640000	254980000	226130000			17.5072	13.1705	10.9868
gi|116076970	3614300	2526900	2724300			0.178709	0.127899	0.135372	6685800	7061500	9052400			0.195086	0.232248	0.307518	0	1383700	1654800			0	0.0714721	0.0804003
gi|116076971	679430	671650	1508600			0.0335944	0.0339955	0.0749634	0	0	1378900			0	0	0.0468424	-	-	-			-	-	-
gi|116076972	1075100	1172600	1417800			0.0531583	0.0593511	0.0704514	6428300	5433900	4654200			0.187573	0.178717	0.158107	1524600	1237300	1425600			0.0896771	0.0639101	0.0692644
gi|116076973	61015000	72312000	121820000			3.01689	3.66007	6.05332	37435000	27648000	27877000			1.09232	0.909324	0.947005	91309000	171170000	118670000			5.3708	8.84143	5.76572
gi|116076974	7129200	5906000	7462100			0.352503	0.298932	0.370797	38303000	35601000	27514000			1.11765	1.17089	0.934674	4401500	2503900	4279800			0.258897	0.129334	0.207939
gi|116076975	4715200	6749600	8296400			0.233143	0.341631	0.412254	7745700	6725200	6669900			0.226013	0.221187	0.226582	20630000	15969000	566410			1.21346	0.824845	0.0275197
gi|116076976	2183200000	519329984	1979399936			107.948	26.2859	98.3577	2609000	3133600	2727800			0.0761285	0.103062	0.0926657	3423200	4384100	1947900			0.201353	0.226451	0.0946409
gi|116076979	118320000	162440000	152870000			5.85033	8.2219	7.59621	26924000	28504000	23331000			0.78562	0.937477	0.792574	12801000	17163000	15835000			0.752956	0.886519	0.769362
gi|116076985	118760000	51820000	60720000			5.87209	2.62287	3.01722	54400000	28528000	37938000			1.58735	0.938267	1.28879	201750000	133260000	206760000			11.8669	6.88326	10.0457
gi|116076986	22465000	19855000	19528000			1.11078	1.00496	0.97036	70971000	68390000	82598000			2.07088	2.2493	2.80592	56632000	62768000	49820000			3.3311	3.24215	2.42056
gi|116076987	8567100	11107000	8512300			0.4236	0.56218	0.422982	15095000	11610000	12594000			0.44046	0.381845	0.427829	4784600	5938800	5340700			0.281431	0.306756	0.259484
gi|116076988	2627700	3198800	3777700			0.129927	0.161907	0.187716	7853700	9792100	17988000			0.229165	0.322056	0.611068	5913600	3319200	3647600			0.347838	0.171446	0.177223
gi|116076992	2611200	2197500	2299000			0.129111	0.111226	0.114239	6757200	7267000	8644100			0.19717	0.239007	0.293647	1928300	1015900	1487000			0.113423	0.0524742	0.0722476
gi|116076993	10347000	10490000	10890000			0.511607	0.530951	0.541131	7306400	10036000	5899500			0.213195	0.330077	0.200411	8401100	9028800	9529200			0.494153	0.466364	0.462987
gi|116076994	3489300	8287700	18042000			0.172528	0.419482	0.896519	4724600	2691800	14398000			0.13786	0.0885315	0.489112	1142300	4779400	1126200			0.0671902	0.24687	0.0547177
gi|116076997	169750000	146910000	125450000			8.39329	7.43585	6.2337	413220000	343300000	262420000			12.0574	11.2909	8.91463	83376000	107820000	81406000			4.90418	5.56921	3.9552
gi|116076998	81166000	64166000	69141000			4.01325	3.24776	3.43566	150260000	128700000	124940000			4.38446	4.23286	4.24432	21407000	58764000	59179000			1.25916	3.03533	2.87528
gi|116076999	1353400	1883700	2058600			0.0669188	0.0953434	0.102293	7657100	8797200	11250000			0.223428	0.289334	0.382172	3674500	6270500	3821200			0.216134	0.323889	0.185657
gi|116077001	6759900	4663800	0			0.334243	0.236058	0	2922600	2627600	0			0.0852791	0.08642	0	0	0	2352800			0	0	0.114313
gi|116077003	22622000	15931000	27972000			1.11854	0.806347	1.38995	14861000	14293000	11511000			0.433632	0.470087	0.391038	12762000	16162000	0			0.750662	0.834814	0
gi|116077004	5074000	2651100	2822000			0.250884	0.134185	0.140227	1000000	959890	0			0.0291792	0.0315701	0	13490000	9551700	7824500			0.793483	0.493373	0.380162
gi|116077005	10980000	19284000	16563000			0.542906	0.976059	0.823027	7808100	8327400	7350800			0.227834	0.273883	0.249713	13117000	14357000	13102000			0.771543	0.741581	0.636576
gi|116077007	16912000	20998000	21832000			0.836214	1.06281	1.08485	34807000	31759000	32163000			1.01564	1.04453	1.0926	2741600	8117800	7795700			0.161261	0.419308	0.378763
gi|116077008	1166300	1550700	1086200			0.0576677	0.0784886	0.053974	2328100	1613900	1641600			0.0679321	0.0530801	0.0557666	0	1283900	1454500			0	0.0663171	0.0706685
gi|116077009	10763000	10921000	9321000			0.532176	0.552766	0.463167	5212000	1781300	1236300			0.152082	0.0585858	0.0419982	5426700	5989800	7009600			0.319199	0.30939	0.340569
gi|116077011	829320000	781230016	889939968			41.0057	39.5419	44.2217	1115000064	972609984	1012800000			32.5348	31.9885	34.4057	620129984	574329984	673120000			36.4761	29.6658	32.7043
gi|116077012	14284000	15050000	10355000			0.706272	0.761755	0.514547	19302000	13848000	7341400			0.563217	0.455451	0.249394	17489000	15410000	12365000			1.0287	0.795971	0.600768
gi|116077013	625950016	615080000	337289984			30.9501	31.1323	16.7602	389680000	370020000	488289984			11.3705	12.1697	16.5876	945280000	668240000	870169984			55.6014	34.5165	42.2782
gi|116077014	8772200	8954600	9075800			0.433741	0.453237	0.450983	16678000	17460000	10379000			0.486651	0.574248	0.352583	23619000	20899000	17654000			1.38927	1.07949	0.85774
gi|116077015	48670000	46465000	46290000			2.40649	2.35182	2.30018	128420000	75459000	90421000			3.74719	2.4818	3.07168	26128000	36313000	31267000			1.53685	1.87567	1.51914
gi|116077016	79057000	71137000	54109000			3.90897	3.6006	2.68871	151450000	137700000	100390000			4.41919	4.52886	3.41033	52303000	58079000	60841000			3.07647	2.99995	2.95603
gi|116077017	2354800	2965400	4218200			0.116433	0.150094	0.209605	5722600	6611500	7374600			0.166981	0.217448	0.250521	5688100	6743100	6022400			0.334574	0.348301	0.292605
gi|116077018	19922999296	18677000192	19204999168			985.092	945.336	954.309	29667999744	25688999936	32049000448			865.688	844.894	1088.73	40580001792	25873000448	29781000192			2386.92	1336.42	1446.94
gi|116077019	81143000	79601000	73428000			4.01211	4.029	3.64869	95112000	99544000	150530000			2.77529	3.27394	5.11363	117630000	154440000	112270000			6.919	7.97727	5.45477
gi|116077020	9564100	12949000	7811400			0.472897	0.655413	0.388154	10598000	17112000	14616000			0.309241	0.562802	0.496518	16123000	14195000	14565000			0.948356	0.733213	0.707657
gi|116077021	0	1142100	0			0	0.0578074	0	-	-	-			-	-	-	-	-	-			-	-	-
gi|116077022	72454000	71048000	86276000			3.58249	3.59609	4.28711	212770000	205070000	188070000			6.20846	6.74461	6.3889	81841000	74575000	74278000			4.81389	3.85201	3.60888
gi|116077023	216060000	259660000	249200000			10.6831	13.1427	12.3829	122190000	112670000	137140000			3.56541	3.70564	4.65876	33022000	75351000	71028000			1.94236	3.8921	3.45098
gi|116077024	1585400	2470100	1291500			0.0783901	0.125024	0.0641755	-	-	-			-	-	-	0	924590	612570			0	0.0477577	0.0297624
gi|116077025	149170000	123400000	168810000			7.37571	6.24589	8.38828	167510000	193390000	198760000			4.88781	6.36047	6.75205	49916000	87550000	113560000			2.93606	4.52221	5.51744
gi|116077026	27183000	30948000	31971000			1.34406	1.56643	1.58866	15487000	20730000	9544800			0.451898	0.681796	0.324245	42864000	54823000	39008000			2.52126	2.83177	1.89525
gi|116077030	25030000	33467000	24814000			1.23761	1.69393	1.23302	195560000	290769984	384289984			5.70628	9.56323	13.0547	68677000	59351000	53396000			4.03959	3.06565	2.59431
gi|116077031	1961900	2363400	4766400			0.0970061	0.119623	0.236846	5191400	3952000	3515200			0.151481	0.129979	0.119414	3276100	2137600	4276100			0.1927	0.110413	0.207759
gi|116077032	0	354020	0			0	0.0179187	0	3338500	4260500	4355800			0.0974147	0.140125	0.14797	1208600	1419300	1446900			0.0710899	0.073311	0.0702993
gi|116077034	97697000	86448000	134730000			4.83063	4.37556	6.69482	178260000	112400000	235740000			5.20148	3.69676	8.00829	209390000	184750000	171160000			12.3163	9.54287	8.316
gi|116077035	5126500	4778900	6155200			0.25348	0.241884	0.305856	14619000	10911000	15714000			0.426571	0.358855	0.533818	3515300	3212000	3374500			0.20677	0.165909	0.163954
gi|116077038	168910000	173670000	154420000			8.35175	8.7903	7.67323	221770000	151530000	116010000			6.47107	4.98372	3.94096	10009000	37405000	35567000			0.58873	1.93208	1.72806
gi|116077042	38594000	43896000	36793000			1.90828	2.22179	1.82827	69136000	70268000	66134000			2.01733	2.31107	2.24663	15735000	5075100	6285000			0.925534	0.262144	0.305364
gi|116077043	23623000	26556000	25264000			1.16804	1.34413	1.25539	102620000	75531000	110280000			2.99437	2.48416	3.74631	38823000	24474000	26671000			2.28357	1.26415	1.29584
gi|116077045	819190	1384000	0			0.0405048	0.0700511	0	-	-	-			-	-	-	0	965100	0			0	0.0498502	0
gi|116077046	6743100	7978200	5676800			0.333412	0.403816	0.282084	29102000	20445000	21421000			0.849173	0.672422	0.72769	6650300	9138300	9642100			0.391171	0.47202	0.468472
gi|116077047	9542400	9453900	8738900			0.471824	0.478509	0.434242	15235000	9745900	8295300			0.444545	0.320536	0.281798	6222000	10080000	8458100			0.365978	0.520661	0.410946
gi|116077050	220260000	221370000	266910000			10.8908	11.2046	13.2629	491260000	408820000	416590016			14.3346	13.4458	14.1519	98706000	149150000	135370000			5.80589	7.70403	6.57711
gi|116077051	3336700	3601700	3598500			0.164983	0.1823	0.178812	25185000	20002000	22051000			0.734878	0.657852	0.749091	0	343000	0			0	0.0177169	0
gi|116077053	2647100	3000300	0			0.130886	0.15186	0	4373200	4031400	2906100			0.127606	0.13259	0.0987227	2180000	2731800	2479200			0.128228	0.141105	0.120455
gi|116077059	11178000	13607000	1828700			0.552696	0.688718	0.0908693	6197300	7590200	7301000			0.180832	0.249637	0.248021	0	219320	226090			0	0.0113285	0.0109848
gi|116077061	7320400	6176300	5349500			0.361957	0.312613	0.26582	4738200	7188700	7711200			0.138257	0.236432	0.261956	8970100	9858900	10038000			0.527622	0.509241	0.487708
gi|116077062	1327600	2249500	1736400			0.0656432	0.113858	0.0862829	10187000	7103000	7543900			0.297248	0.233613	0.256273	1657700	1564900	2804100			0.097506	0.0808316	0.13624
gi|116077063	65599000	73041000	70894000			3.24354	3.69697	3.52277	226760000	156860000	143700000			6.61667	5.15902	4.88161	37096000	36131000	37730000			2.18199	1.86627	1.83316
gi|116077066	2008300032	1646300032	2288900096			99.3004	83.3274	113.737	1781400064	1598200064	2861700096			51.9798	52.5637	97.2144	2309900032	2443800064	1569799936			135.868	126.229	76.2705
gi|116077067	2666100	2304700	2995700			0.131825	0.116652	0.148858	3865500	2696000	2009100			0.112792	0.0886696	0.0682508	2019500	5269900	1250800			0.118787	0.272206	0.0607715
gi|116077068	6391000	8334600	9984400			0.316003	0.421856	0.496132	11536000	8613300	8750800			0.336611	0.283286	0.297272	5645700	6383500	6617400			0.33208	0.329726	0.321514
gi|116077069	1490099968	1542300032	1487600000			73.678	78.0635	73.9198	2376600064	1743399936	2405100032			69.3473	57.3393	81.7033	3230899968	2747099904	4391799808			190.042	141.896	213.381
gi|116077070	527060	373360	401470			0.0260605	0.0188976	0.0199493	1050300	1308800	0			0.0306469	0.0430456	0	-	-	-			-	-	-
gi|116077074	2797499904	2875099904	2556499968			138.322	145.523	127.034	1760700032	2400399872	2137900032			51.3758	78.9475	72.6263	1631100032	1693600000	2128300032			95.9414	87.4793	103.406
gi|116077075	17291000	18156000	16281000			0.854953	0.918965	0.809014	20518000	13053000	13324000			0.598699	0.429304	0.452628	5600100	6287700	6014500			0.329398	0.324778	0.292221
gi|116077077	5085700	5503400	5434900			0.251462	0.278554	0.270064	25759000	15910000	21158000			0.751627	0.523269	0.718755	5268000	4337300	3461700			0.309864	0.224034	0.168191
gi|116077078	3176700	2805800	2891100			0.157072	0.142015	0.143661	2284700	1717800	2026000			0.0666657	0.0564973	0.0688249	0	0	257340			0	0	0.0125032
gi|116077079	43793000	96939000	26438000			2.16534	4.90656	1.31372	9969900	3007500	11557000			0.290914	0.0989147	0.392601	8680600	10608000	5839500			0.510593	0.547934	0.283719
gi|116077082	3383200	3375100	3249500			0.167282	0.170831	0.16147	11919000	10173000	14065000			0.347787	0.334583	0.4778	6442200	3552000	4292600			0.378931	0.183471	0.208561
gi|116077083	2118300	2878700	0			0.104739	0.145705	0	14761000	12866000	16240000			0.430714	0.423154	0.551687	4406200	6456700	0			0.259173	0.333507	0
gi|116077084	544350016	665849984	536960000			26.9154	33.702	26.6819	96447000	72527000	45985000			2.81425	2.38536	1.56215	193740000	449030016	316809984			11.3958	23.1937	15.3926
gi|116077086	23071000	29626000	26783000			1.14075	1.49952	1.33087	-	-	-			-	-	-	-	-	-			-	-	-
gi|116077087	5919600	4979100	5428500			0.292695	0.252017	0.269746	111360000	135930000	115410000			3.24939	4.47065	3.92058	11589000	19717000	14358000			0.681666	1.01844	0.6976
gi|116077089	283569984	237070000	204230000			14.0211	11.9993	10.1483	457110016	387350016	359470016			13.3381	12.7397	12.2115	425049984	230920000	327270016			25.0015	11.9277	15.9008
gi|116077092	18850000	15549000	14263000			0.932038	0.787012	0.708738	26440000	77117000	83827000			0.771498	2.53633	2.84767	14298000	17638000	23828000			0.841009	0.911054	1.15771
gi|116077093	0	618320	613190			0	0.0312962	0.0304698	5382700	5485100	4636600			0.157063	0.180401	0.157509	1405500	924370	753420			0.0826716	0.0477464	0.0366058
gi|116077095	4417400	5400800	4806600			0.218418	0.273361	0.238843	21993000	18009000	13482000			0.641738	0.592304	0.457995	32772000	24049000	31638000			1.92765	1.2422	1.53717
gi|116077097	7148500	7564300	9448000			0.353457	0.382867	0.469478	14484000	14096000	13816000			0.422631	0.463608	0.469341	5739100	5859400	4950200			0.337574	0.302655	0.240511
gi|116077098	114070000	124680000	100830000			5.64019	6.31067	5.01031	266890000	277889984	262080000			7.78763	9.13961	8.90308	153590000	146130000	133230000			9.03417	7.54804	6.47313
gi|116077099	2428999936	2075000064	2893799936			120.102	105.026	143.795	1322400000	1624999936	1542300032			38.5866	53.4452	52.3932	711990016	1492099968	1676999936			41.8793	77.0713	81.479
gi|116077101	24068000	15487000	14053000			1.19004	0.783874	0.698303	52641000	47309000	45643000			1.53602	1.55596	1.55053	7645500	3861400	6670500			0.449709	0.199452	0.324094
gi|116077102	202340000	195990000	192850000			10.0047	9.92003	9.58285	210320000	174620000	156930000			6.13697	5.74313	5.33105	48259000	149350000	158880000			2.8386	7.71436	7.71937
gi|116077105	7907000	9521100	10060000			0.390961	0.48191	0.499888	58580000	42242000	18902000			1.70932	1.38931	0.642117	6978400	9224200	8123600			0.41047	0.476457	0.394694
gi|116077106	4231100	3113300	5100400			0.209207	0.15758	0.253442	18435000	14250000	14940000			0.537918	0.468673	0.507525	3324700	2874900	3583000			0.195559	0.148497	0.174084
gi|116077108	72674000	80727000	94906000			3.59336	4.08599	4.71594	266220000	214640000	250430000			7.76808	7.05937	8.50732	75452000	148700000	101020000			4.43809	7.68079	4.90817
gi|116077111	6080700	6562800	5111100			0.30066	0.332176	0.253974	16786000	10127000	12265000			0.489802	0.33307	0.416653	12412000	14185000	14347000			0.730075	0.732696	0.697065
gi|116077112	11224000	14961000	9731800			0.55497	0.757251	0.48358	-	-	-			-	-	-	2795800	3294300	0			0.164449	0.17016	0
gi|116077115	354340000	391809984	501640000			17.5203	19.8315	24.9268	536329984	625009984	659910016			15.6497	20.5562	22.4177	558700032	556430016	557070016			32.8628	28.7412	27.0659
gi|116077119	3887000	4283200	3895800			0.192193	0.216794	0.193585	21806000	16753000	12062000			0.636281	0.550995	0.409756	1872900	3249200	3344100			0.110164	0.167831	0.162477
gi|116077120	502609984	627769984	795260032			24.8515	31.7746	39.517	794540032	883299968	861230016			23.184	29.0511	29.2567	639379968	1136999936	1179299968			37.6084	58.7293	57.2976
gi|116077121	2302599936	1960800000	1891200000			113.852	99.2458	93.975	1657900032	1336999936	2402500096			48.3762	43.973	81.615	4108600064	4927399936	3043399936			241.668	254.514	147.867
gi|116077124	8647400	7899500	7682000			0.427571	0.399833	0.381724	10688000	10310000	8871700			0.311867	0.339089	0.301379	2588400	2983700	3515400			0.15225	0.154117	0.1708
gi|116077125	480900	549240	483670			0.0237781	0.0277998	0.0240339	-	-	-			-	-	-	769520	857030	630780			0.0452632	0.0442681	0.0306472
gi|116077126	1931400	2282200	2508500			0.095498	0.115513	0.124649	8243500	10047000	12714000			0.240539	0.330439	0.431905	0	5180600	6375700			0	0.267593	0.309771
gi|116077129	8641500	9648300	9906400			0.427279	0.488348	0.492256	74460000	60833000	52654000			2.17268	2.00076	1.7887	5998000	4108100	6746500			0.352803	0.212195	0.327786
gi|116077130	57680000	74700000	92877000			2.85199	3.78094	4.61512	63668000	69383000	74500000			1.85778	2.28196	2.53083	64735000	44459000	43229000			3.80772	2.29644	2.10033
gi|116077131	271889984	278590016	272910016			13.4436	14.1008	13.5611	223810000	222970000	198280000			6.53059	7.33333	6.73574	62502000	76796000	64606000			3.67637	3.96674	3.13896
gi|116077135	2715500	3571000	5195200			0.134268	0.180746	0.258153	3137700	1965500	1813000			0.0915555	0.064644	0.0615892	1465800	3743300	1421700			0.0862185	0.193352	0.0690749
gi|116077136	5778500	6714700	7306800			0.285718	0.339864	0.36308	1192800	966130	0			0.0348049	0.0317754	0	0	32250	0			0	0.00166581	0
gi|116077137	91925000	78065000	99451000			4.54523	3.95126	4.94179	195420000	184060000	181970000			5.7022	6.05361	6.18168	143280000	148200000	115830000			8.42774	7.65496	5.62773
gi|116077140	118200000	149540000	136170000			5.8444	7.56896	6.76638	463240000	571840000	815299968			13.517	18.8074	27.6964	328880000	92452000	230470000			19.3447	4.77541	11.1976
gi|116077141	276240000	356680000	358560000			13.6587	18.0533	17.8171	453790016	548529984	461790016			13.2412	18.0408	15.6874	549840000	502529984	427860000			32.3416	25.9571	20.7881
gi|116077143	156730000	140660000	134750000			7.74951	7.1195	6.69582	198780000	159650000	183820000			5.80024	5.25078	6.24452	116570000	159080000	154720000			6.85666	8.21694	7.51725
gi|116077146	78579000	62332000	69375000			3.88534	3.15493	3.44729	136060000	138860000	126570000			3.97012	4.56701	4.29969	77851000	40609000	67074000			4.5792	2.09757	3.25887
gi|116077148	5452800	8596500	6815600			0.269614	0.435112	0.338672	-	-	-			-	-	-	-	-	-			-	-	-
gi|116077149	17703000	13986000	13776000			0.875324	0.707901	0.684539	2773600	3000000	3547500			0.0809314	0.098668	0.120512	5727700	0	3718900			0.336904	0	0.180687
gi|116077150	0	776890	987600			0	0.0393223	0.0490745	-	-	-			-	-	-	-	-	-			-	-	-
gi|116077151	7038600	8964400	5595200			0.348023	0.453733	0.278029	3118700	2465500	2405200			0.0910011	0.0810886	0.0817067	1135400	0	1344600			0.0667843	0	0.0653289
gi|116077156	2598300	3096700	2731700			0.128473	0.156739	0.13574	3917000	3284700	4641600			0.114295	0.108032	0.157679	2215300	0	0			0.130304	0	0
gi|116077157	7546999808	6196899840	8359799808			373.161	313.656	415.404	10945999872	12764999680	11898999808			319.395	419.832	404.219	15480999936	17642000384	15422000128			910.593	911.26	749.296
gi|116077159	2615700	3290600	2778000			0.129333	0.166554	0.138041	9933600	10933000	12894000			0.289854	0.359579	0.43802	3862400	5197300	3330600			0.227187	0.268456	0.161821
gi|116077160	168530000	144000000	133350000			8.33296	7.28856	6.62625	99276000	127220000	173970000			2.89679	4.18418	5.90991	244210000	276550016	188840000			14.3644	14.2846	9.17501
gi|116077161	4265999872	3849600000	4772599808			210.932	194.847	237.154	5676700160	7406600192	6605700096			165.642	243.598	224.401	5322800128	5138299904	5189300224			313.087	265.408	252.128
gi|116077164	256180000	178660000	186330000			12.6668	9.04287	9.25886	407860000	366300000	375670016			11.901	12.0474	12.7618	266860000	287680000	262240000			15.6967	14.8595	12.7412
gi|116077165	30324000	32147000	37799000			1.49937	1.62712	1.87826	43365000	63973000	58657000			1.26536	2.10403	1.99263	21890000	15047000	14056000			1.28757	0.777221	0.682927
gi|116077166	15257000	15619000	7334900			0.754382	0.790555	0.364476	30398000	38124000	42708000			0.886989	1.25387	1.45083	0	329920	378580			0	0.0170413	0.0183937
gi|116077167	38670000	46563000	28776000			1.91204	2.35678	1.4299	50682000	54537000	52953000			1.47886	1.79369	1.79886	10919000	11292000	12351000			0.642256	0.583264	0.600087
gi|116077168	15737000	19769000	12731000			0.778116	1.00061	0.632612	7733300	6472500	6436100			0.225651	0.212876	0.21864	0	23444000	20582000			0	1.21095	1
gi|116077170	72553000	54995000	79732000			3.58738	2.78357	3.96194	89958000	95671000	115570000			2.6249	3.14655	3.92601	98911000	57570000	74188000			5.81795	2.97366	3.60451
gi|116077172	1564700	1703500	1611100			0.0773666	0.0862226	0.0800566	4814700	3517200	7436100			0.140489	0.115678	0.252611	0	0	331830			0	0	0.0161223
gi|116077174	11454000	11033000	13263000			0.566343	0.558435	0.659047	22899000	16309000	12046000			0.668174	0.536392	0.409213	10909000	20685000	16365000			0.641668	1.06844	0.795112
gi|116077178	11756000	11491000	8362400			0.581275	0.581617	0.415533	7400400	5786300	9698600			0.215938	0.190308	0.32947	8802300	10615000	7414100			0.517752	0.548295	0.360223
gi|116077179	453880000	432540000	448020000			22.4421	21.893	22.2624	912190016	968670016	1184099968			26.617	31.8589	40.2249	261040000	228510000	212840000			15.3544	11.8032	10.3411
gi|116077180	12322000	12985000	813880			0.609261	0.657235	0.0404422	-	-	-			-	-	-	-	-	-			-	-	-
gi|116077181	37028000	41267000	40376000			1.83085	2.08873	2.00631	112800000	110250000	118100000			3.29141	3.62605	4.01196	47529000	53455000	46502000			2.79566	2.76111	2.25935
gi|116077184	9588800	7559200	10945000			0.474118	0.382609	0.543864	11132000	13212000	9045900			0.324823	0.434534	0.307297	1468100	2062400	1768100			0.0863537	0.106529	0.0859052
gi|116077185	15092000	12028000	25889000			0.746224	0.608797	1.28644	80295000	73834000	84778000			2.34294	2.42835	2.87998	18959000	18147000	27963000			1.11517	0.937345	1.35861
gi|116077186	1138000000	1148099968	1338300032			56.2684	58.111	66.501	1638599936	1864199936	2408199936			47.813	61.3123	81.8086	890470016	1392499968	1081500032			52.3775	71.9267	52.5459
gi|116077187;REV__gi|116077187	12890000	30905000	18956000			0.637346	1.56426	0.941936	-	-	-			-	-	-	13772000	12217000	17445000			0.81007	0.631043	0.847585
gi|116077188	9239800	1099400	160960000			0.456862	0.0556461	7.99821	-	-	-			-	-	-	-	-	-			-	-	-
gi|116077189	42721000	50339000	49345000			2.11234	2.54791	2.45199	32952000	40310000	48282000			0.961513	1.32577	1.64018	76981000	66434000	42863000			4.52803	3.43151	2.08255
gi|116077191	14906000	17064000	20730000			0.737027	0.863694	1.03009	52694000	52994000	62127000			1.53757	1.74294	2.11051	33201000	34403000	34003000			1.95289	1.77701	1.65207
gi|116077195	147230000	116560000	155710000			7.27978	5.89968	7.73734	87726000	59849000	86668000			2.55977	1.96839	2.94419	36733000	61349000	60327000			2.16064	3.16885	2.93106
gi|116077196	0	0	775580			0	0	0.0385391	5952200	5312400	3894600			0.17368	0.174721	0.132303	0	0	1751000			0	0	0.0850743
gi|116077197	8611800064	6575499776	10074999808			425.81	332.819	500.634	8676400128	12924999680	13223000064			253.17	425.095	449.197	11219999744	9150199808	10117000192			659.961	472.634	491.546
gi|116077198	33678000	25678000	23912000			1.66521	1.29969	1.1882	8436700	11001000	6384500			0.246176	0.361815	0.216887	959360	3113300	2189700			0.0564296	0.160811	0.106389
gi|116077199	317500000	499660000	286900000			15.6988	25.2903	14.2563	296510016	308420000	304630016			8.65192	10.1437	10.3485	196270000	319230016	253550000			11.5446	16.4892	12.319
gi|116077200	925990	6603600	0			0.0457856	0.334241	0	-	-	-			-	-	-	-	-	-			-	-	-
gi|116077201	80718000	83675000	101330000			3.9911	4.23521	5.03516	197120000	180630000	158550000			5.7518	5.9408	5.38608	9673700	19624000	24607000			0.569008	1.01364	1.19556
gi|116077203	65824000	114480000	88280000			3.25467	5.7944	4.38669	189060000	210360000	182110000			5.51662	6.9186	6.18643	157750000	294710016	128860000			9.27887	15.2226	6.26081
gi|116077206	9417100	9631800	9539500			0.465628	0.487513	0.474024	14909000	17672000	12314000			0.435033	0.58122	0.418317	8977000	14093000	9399500			0.528028	0.727944	0.456685
gi|116077207	0	0	3284700			0	0	0.163219	90374000	26650000	0			2.63704	0.876501	0	-	-	-			-	-	-
gi|116077209	8682500	8525300	11525000			0.429306	0.431508	0.572685	7185500	9589000	14282000			0.209667	0.315376	0.485172	5289800	7115000	7114800			0.311146	0.36751	0.345681
gi|116077210	61121000	65655000	50485000			3.02213	3.32313	2.50863	11037000	10915000	12196000			0.322051	0.358987	0.414309	79573000	86431000	74746000			4.68049	4.46441	3.63162
gi|116077211	39734000	39369000	34876000			1.96465	1.99266	1.73301	21830000	23952000	13422000			0.636982	0.787765	0.455957	33743000	19239000	22131000			1.98477	0.99375	1.07526
gi|116077212	1587100032	1384400000	1606800000			78.4741	70.0714	79.843	2819800064	2765600000	2975899904			82.2795	90.9587	101.094	1366800000	1996300032	1401600000			80.3953	103.115	68.0983
gi|116077213	88292000	73038000	73466000			4.3656	3.69682	3.65058	110200000	87339000	86146000			3.21555	2.87252	2.92645	43644000	43498000	38965000			2.56714	2.2468	1.89316
gi|116077214	605070016	391230016	436649984			29.9177	19.8021	21.6974	719870016	657670016	501900000			21.0052	21.6303	17.05	150580000	215420000	167340000			8.85713	11.1271	8.13041
gi|116077218	35550000	37765000	53176000			1.75777	1.91147	2.64235	87664000	89458000	88050000			2.55796	2.94221	2.99113	7147900	46010000	48222000			0.42044	2.37655	2.34292
gi|116077220	891520	1130800	859330			0.0440812	0.0572354	0.0427007	1121800	0	1780400			0.0327332	0	0.0604817	0	779560	610240			0	0.0402665	0.0296492
gi|116077221	5623800	18823000	11236000			0.278069	0.952726	0.558324	9142900	7219200	10357000			0.266782	0.237435	0.351836	19626000	0	0			1.1544	0	0
gi|116077223	4323200	2878100	2846300			0.213761	0.145675	0.141435	15422000	14637000	14060000			0.450001	0.481401	0.47763	16236000	13463000	16029000			0.955003	0.695403	0.778787
gi|116077224	683550016	642579968	726049984			33.7981	32.5242	36.0779	911260032	968150016	755969984			26.5898	31.8418	25.6809	266810000	244570000	384240000			15.6938	12.6327	18.6687
gi|116077225	6782000	5281100	4600100			0.335336	0.267303	0.228582	29374000	27199000	23919000			0.85711	0.894557	0.812549	1582900	0	2752500			0.0931063	0	0.133733
gi|116077226	4380700160	4018700032	4534400000			216.604	203.406	225.317	2049900032	2073299968	1937799936			59.8144	68.1894	65.8287	5443500032	4936200192	5306699776			320.187	254.969	257.832
gi|116077228	186270000	182440000	151610000			9.21012	9.2342	7.5336	423689984	552009984	574369984			12.3629	18.1552	19.5118	289049984	320070016	250300000			17.0019	16.5325	12.1611
gi|116077229	90863000	102510000	70714000			4.49272	5.18854	3.51383	51856000	30405000	28005000			1.51312	1	0.951354	0	18853000	22176000			0	0.973812	1.07745
gi|116077230	25393000	32144000	27720000			1.25556	1.62697	1.37743	55759000	51106000	54969000			1.627	1.68084	1.86734	46171000	38639000	38861000			2.71578	1.99582	1.88811
gi|116077231	6064700	6892500	5649100			0.299869	0.348864	0.280708	14041000	10552000	7770000			0.409705	0.347048	0.263954	1253700	0	1593300			0.0737427	0	0.0774123
gi|116077232	189410	263420	144530			0.00936537	0.013333	0.00718179	-	-	-			-	-	-	555060	0	0			0.0326487	0	0
gi|116077233	380080000	611219968	735310016			18.793	30.9369	36.5381	2532800000	3119000064	1950700032			73.9051	102.582	66.2669	1348499968	1802400000	1901900032			79.3189	93.0992	92.406
gi|116077234	58571000	56070000	36644000			2.89604	2.83798	1.82087	76437000	57149000	97036000			2.23037	1.87959	3.2964	30028000	23546000	38884000			1.76625	1.21622	1.88922
gi|116077235	14307000	13724000	12145000			0.707409	0.69464	0.603493	19408000	13047000	11939000			0.56631	0.429107	0.405578	2574400	5541200	8858800			0.151426	0.286219	0.430415
gi|116077236	1275600	1332700	0			0.063072	0.0674546	0	3166700	2609700	0			0.0924017	0.0858313	0	-	-	-			-	-	-
gi|116077237	4621400064	4512000000	4937200128			228.505	228.375	245.333	4390400000	4420499968	5578100224			128.108	145.387	189.493	4783000064	1385900032	2571399936			281.336	71.5857	124.934
gi|116077238	3306100	3770600	4029800			0.16347	0.190849	0.200243	4924900	8081400	5957700			0.143705	0.265792	0.202388	3524500	3851600	6362400			0.207311	0.198946	0.309124
gi|116077239	1692400000	1446400000	1952600064			83.6807	73.2095	97.026	4292900096	3595699968	3720800000			125.263	118.26	126.399	3733600000	5501700096	5105600000			219.611	284.179	248.061
gi|116077240	3946700	1285600	1136200			0.195145	0.0650706	0.0564585	-	-	-			-	-	-	-	-	-			-	-	-
gi|116077242	456520000	459520000	711569984			22.5726	23.2586	35.3584	87136000	222920000	375430016			2.54256	7.33169	12.7537	120200000	166470000	206740000			7.07017	8.59866	10.0447
gi|116077243	0	1174700	0			0	0.0594574	0	5273600	4046100	3388300			0.153879	0.133074	0.115103	5119300	4413700	3661100			0.301118	0.22798	0.177879
gi|116077244	3670900	6428800	4407700			0.181508	0.325394	0.219022	5414000	5389700	5414600			0.157976	0.177264	0.183939	4929900	7451000	7358900			0.289977	0.384866	0.357541
gi|116077245	1769299968	1828499968	2167600128			87.483	92.5495	107.71	1404000000	1455600000	1638599936			40.9676	47.8737	55.6646	1094599936	1364300032	1286499968			64.3844	70.47	62.5061
gi|116077246	675310	636990	470070			0.0333907	0.0322412	0.0233581	3283000	2050600	2176100			0.0957953	0.0674429	0.073924	0	1110100	1867000			0	0.0573399	0.0907103
gi|116077247	10007000	6418700	8523100			0.494796	0.324882	0.423519	21642000	23144000	16095000			0.631496	0.761191	0.546761	9981100	12499000	12858000			0.587089	0.64561	0.624721
gi|116077249	128300000	128120000	125730000			6.34379	6.48479	6.24761	175030000	189030000	165690000			5.10723	6.21707	5.62863	83665000	66014000	76369000			4.92118	3.40981	3.71048
gi|116077250	721900	529710	712780			0.0356943	0.0268113	0.0354185	3250600	4286700	4095600			0.0948499	0.140987	0.139131	416420	485020	543980			0.0244939	0.0250527	0.0264299
gi|116077251	416129984	611859968	647070016			20.5755	30.9693	32.1533	386140000	607169984	316070016			11.2673	19.9694	10.7372	438809984	449870016	551790016			25.8108	23.2371	26.8093
gi|116077252	36469000	47478000	51190000			1.80321	2.4031	2.54367	56007000	39009000	44103000			1.63424	1.28298	1.49822	46197000	56734000	53750000			2.71731	2.93048	2.61151
gi|116077253	322729984	416990016	324720000			15.9574	21.1059	16.1356	533729984	551340032	529600000			15.5738	18.1332	17.991	59289000	72161000	101370000			3.48738	3.72732	4.92518
gi|116077254	3224400	2743500	5203500			0.15943	0.138862	0.258565	5286500	7997500	8299900			0.154256	0.263032	0.281955	4528800	2579800	3574700			0.266384	0.133254	0.173681
gi|116077255	63930000	85476000	72723000			3.16102	4.32637	3.61365	11662000	15904000	14788000			0.340288	0.523072	0.502361	60871000	76868000	73172000			3.58044	3.97045	3.55515
gi|116077257	439760000	457409984	416489984			21.7439	23.1518	20.6957	1081799936	1004000000	1148600064			31.566	33.0209	39.0189	1009400000	1910000000	1054800000			59.373	98.657	51.2487
gi|116077258	1629100	798820	1754600			0.0805508	0.0404323	0.0871873	4068200	3060000	3214400			0.118707	0.100641	0.109196	0	891860	1441700			0	0.0460671	0.0700466
gi|116077259	14946000	11918000	2792400			0.739005	0.603229	0.138756	0	5211800	0			0	0.171413	0	-	-	-			-	-	-
gi|116077261	518330	499210	490820			0.0256288	0.0252675	0.0243892	6403500	4713000	4794200			0.186849	0.155007	0.162863	341780	377860	314530			0.0201035	0.0195176	0.0152818
gi|116077263	1060600000	1268499968	1295500032			52.4413	64.2051	64.3743	1788199936	1635200000	2212800000			52.1782	53.7806	75.1707	221350000	611120000	524150016			13.0198	31.5661	25.4664
gi|116077264	145120000	127810000	139810000			7.17546	6.4691	6.94725	75531000	92462000	92706000			2.20393	3.04101	3.1493	128390000	116820000	78842000			7.55191	6.03409	3.83063
gi|116077271	1729500	2164600	2567500			0.0855151	0.109561	0.127581	2175300	1859200	1885700			0.0634735	0.0611478	0.0640588	848280	553470	600920			0.0498959	0.0285883	0.0291964
gi|116077274	30423000	31191000	16359000			1.50426	1.57873	0.81289	15114000	17204000	17909000			0.441014	0.565828	0.608384	34296000	34242000	34800000			2.01729	1.7687	1.6908
gi|116077275	13513000	15128000	16618000			0.66815	0.765703	0.82576	16552000	13067000	17929000			0.482974	0.429765	0.609063	62363000	65134000	69403000			3.6682	3.36436	3.37202
gi|116077279	248030000	228540000	254510000			12.2638	11.5675	12.6468	605720000	746720000	765800000			17.6744	24.5591	26.0149	349020000	172030000	251300000			20.5294	8.88585	12.2097
gi|116077281	2819600	3750300	7333300			0.139415	0.189821	0.364397	5913400	5648200	7146400			0.172548	0.185765	0.242769	5082000	10224000	4609500			0.298924	0.528099	0.223958
gi|116077283	5444600	7316300	6624900			0.269208	0.370314	0.329196	18397000	15446000	10693000			0.53681	0.508009	0.36325	0	3313500	3883700			0	0.171152	0.188694
gi|116077284	5525500	7503100	7613100			0.273208	0.379769	0.3783	13031000	7571000	8001600			0.380234	0.249005	0.271821	5781600	7908000	6296500			0.340074	0.408471	0.305923
gi|116077285	230850000	187030000	172560000			11.4144	9.46652	8.57462	158150000	134740000	113830000			4.61469	4.43151	3.8669	149580000	70220000	171320000			8.79831	3.62707	8.32378
gi|116077289	951779968	747320000	904790016			47.0607	37.8256	44.9596	897169984	1764000000	948430016			26.1787	58.0168	32.219	1066300032	1014600000	778000000			62.7198	52.407	37.8
gi|116077292	115300000	128760000	141770000			5.70101	6.51718	7.04465	104910000	128510000	154460000			3.06119	4.22661	5.24714	84416000	195690000	163350000			4.96535	10.108	7.93655
gi|116077294	680730	896520	480230			0.0336587	0.0453773	0.023863	2810400	0	0			0.0820052	0	0	0	325120	0			0	0.0167934	0
gi|116077295	5095700	5942200	6040400			0.251957	0.300764	0.300152	11229000	15975000	10110000			0.327653	0.525407	0.343445	2745800	1994600	4209200			0.161508	0.103027	0.204509
gi|116077296	0	0	6218500			0	0	0.309001	995990	1076600	402930			0.0290622	0.0354086	0.0136879	197170	0	0			0.0115976	0	0
gi|116077297	11804000	7685200	21553000			0.583649	0.388986	1.07098	36604000	35309000	32959000			1.06808	1.16129	1.11965	7330800	5903600	14201000			0.431198	0.304938	0.689972
gi|116077298	4662900	1843200	0			0.230557	0.0932935	0	-	-	-			-	-	-	-	-	-			-	-	-
gi|116077299	0	0	1412000			0	0	0.0701632	3061700	2336700	2213700			0.0893379	0.0768525	0.0752013	-	-	-			-	-	-
gi|116077300;gi|116076026	1113400	1033100	1107600			0.055052	0.0522903	0.0550374	1993000	1785300	1983400			0.0581541	0.0587173	0.0673778	-	-	-			-	-	-
gi|116077301	2542400000	2252999936	2396900096			125.709	114.036	119.104	3166500096	2527800064	4139599872			92.3959	83.1376	140.626	4172800000	2757400064	2252900096			245.444	142.428	109.46
gi|116077305	508070	610570	819950			0.0251215	0.030904	0.0407439	-	-	-			-	-	-	-	-	-			-	-	-
gi|116077306	7525600	13006000	6697800			0.372103	0.658298	0.332818	20412000	12587000	8450300			0.595606	0.413978	0.287064	3698700	7901000	4309900			0.217558	0.40811	0.209401
gi|116077307	632040	657020	679980			0.0312512	0.033255	0.0337887	1023000	1023600	905920			0.0298503	0.0336655	0.0307749	0	0	266770			0	0	0.0129613
gi|116077311	218580000	238870000	299660000			10.8077	12.0904	14.8903	490900000	391720000	460929984			14.3241	12.8834	15.6582	193560000	301150016	309609984			11.3852	15.5553	15.0428
gi|116077312	104430000	86857000	99340000			5.16354	4.39626	4.93627	147930000	117770000	254720000			4.31648	3.87338	8.65306	420280000	217570000	240810000			24.7209	11.2381	11.7
gi|116077313	592890	0	1196300			0.0293154	0	0.059445	-	-	-			-	-	-	-	-	-			-	-	-
gi|116077314	1368700	1302700	1666800			0.0676753	0.0659361	0.0828244	70206000	49069000	57286000			2.04855	1.61385	1.94605	1498300	1272000	2008700			0.0881301	0.0657025	0.097595
gi|116077315	2299500	6034500	0			0.113699	0.305436	0	106380000	173890000	314020000			3.10408	5.71913	10.6675	241590000	63561000	27383000			14.2103	3.28311	1.33043
gi|116077316	579990016	723350016	979329984			28.6776	36.6123	48.6636	1160700032	1513100032	1006899968			33.8683	49.7648	34.2053	1067900032	1108199936	1196999936			62.814	57.2417	58.1576
gi|116077317	33311000	21581000	29931000			1.64706	1.09232	1.48729	54484000	64312000	72845000			1.5898	2.11518	2.47461	7901100	18279000	15914000			0.464743	0.944163	0.7732
gi|116077322	2606800	2217700	2783500			0.128893	0.112249	0.138314	5903600	6680000	3047700			0.172262	0.219701	0.103533	0	2095900	0			0	0.108259	0
gi|116077323	598089984	386350016	292240000			29.5725	19.5551	14.5216	436500000	580369984	449240000			12.7367	19.088	15.2611	931270016	679950016	796510016			54.7774	35.1214	38.6993
gi|116077325	613770	703340	0			0.0303478	0.0355995	0	-	-	-			-	-	-	-	-	-			-	-	-
gi|116077326	460670016	385420000	481340000			22.7778	19.508	23.9181	1486599936	985859968	1257299968			43.3778	32.4243	42.7116	1433100032	1531000064	1258300032			84.295	79.0806	61.1359
gi|116077327	12107000	7561900	10816000			0.59863	0.382745	0.537454	38815000	25742000	19903000			1.13259	0.846637	0.676122	16236000	13991000	11796000			0.955003	0.722676	0.573122
gi|116077328	1904300032	1831100032	1434800000			94.1581	92.6811	71.2962	2893299968	2876699904	3113400064			84.4241	94.6127	105.765	1922800000	2044000000	2254400000			113.099	105.579	109.533
gi|116077329	5373400	4976400	5615500			0.265688	0.25188	0.279038	13986000	11173000	14394000			0.4081	0.367472	0.488976	66501000	53555000	55882000			3.91159	2.76627	2.71509
gi|116077331	1609799936	1736499968	1968899968			79.5965	87.8929	97.836	1360400000	1492000000	1558800000			39.6954	49.0709	52.9538	1634899968	1320000000	1323500032			96.1649	68.1818	64.3038
gi|116077333	10790000	10923000	10999000			0.533511	0.552867	0.546548	71239000	83773000	93641000			2.0787	2.75524	3.18106	66201000	60510000	62758000			3.89395	3.12552	3.04917
gi|116077334	11845000	7746000	6994100			0.585676	0.392064	0.347542	56714000	30032000	62755000			1.65487	0.987732	2.13184	0	0	2911300			0	0	0.141449
gi|116077335	2272000	3004000	1864800			0.112339	0.152047	0.0926632	3792500	4366000	1837400			0.110662	0.143595	0.062418	2253600	0	2418100			0.132557	0	0.117486
gi|116077336	1018100	929800	968520			0.0503399	0.0470618	0.0481264	4447800	3698800	1993800			0.129783	0.121651	0.0677311	2438600	2839100	2950400			0.143439	0.146648	0.143349
gi|116077337	245900000	223650000	214560000			12.1585	11.32	10.6616	156290000	151020000	175160000			4.56042	4.96695	5.95033	28093000	35909000	40765000			1.65243	1.8548	1.98061
gi|116077338	16122000	12874000	9952600			0.797152	0.651617	0.494551	24099000	27257000	24385000			0.703189	0.896464	0.828379	10357000	12846000	17551000			0.609199	0.663533	0.852735
gi|116077339	361780000	478760000	493590016			17.8882	24.2324	24.5268	401409984	364480000	423400000			11.7128	11.9875	14.3833	790960000	813310016	542819968			46.5243	42.0098	26.3735
gi|116077340	2251900	1757000	2376900			0.111345	0.0889305	0.11811	5034000	4526800	5200600			0.146888	0.148883	0.176669	6445000	5315500	5079100			0.379095	0.274561	0.246774
gi|116077341	727520	860300	0			0.0359722	0.0435441	0	8803200	7180200	6195900			0.25687	0.236152	0.21048	1885300	2709400	2584100			0.110893	0.139948	0.125551
gi|116077342	41734000	41343000	66014000			2.06354	2.09257	3.28028	23290000	17703000	19518000			0.679583	0.58224	0.663043	15278000	18626000	29916000			0.898653	0.962087	1.4535
gi|116077343	967010	1997400	966480			0.0478138	0.101098	0.048025	7514500	6718900	7680800			0.219267	0.22098	0.260923	0	0	3332600			0	0	0.161918
gi|116077344	14908000256	13171000320	15223000064			737.126	666.65	756.441	13820000256	14618999808	18155999232			403.256	480.809	616.775	14819000320	13413000192	12256000000			871.655	692.82	595.472
gi|116077350	18060000	25929000	17770000			0.892976	1.3124	0.883003	35415000	23523000	25876000			1.03338	0.773656	0.87903	22035000	23506000	28914000			1.2961	1.21415	1.40482
gi|116077352	24922000	43217000	33135000			1.23227	2.18743	1.6465	50944000	65450000	40672000			1.4865	2.15261	1.38166	39726000	15287000	26295000			2.33669	0.789618	1.27757
gi|116077353	471600000	340369984	524440000			23.3183	17.2278	26.0598	179680000	220070000	294329984			5.24292	7.23795	9.99864	149060000	138910000	142770000			8.76772	7.1751	6.93664
gi|116077356	631980032	775750016	684390016			31.2482	39.2646	34.0078	1887699968	2386500096	2159000064			55.0816	78.4904	73.3431	1635900032	1583000064	2078899968			96.2238	81.7665	101.006
gi|116077359	660200000	169200000	573209984			32.6436	8.56405	28.4832	-	-	-			-	-	-	-	-	-			-	-	-
gi|116077361	13393000	11179000	9478800			0.662217	0.565825	0.471008	50098000	40630000	58465000			1.46182	1.33629	1.98611	14796000	10577000	8048500			0.870302	0.546333	0.391046
gi|116077365	91839000	112210000	85157000			4.54098	5.67951	4.23151	197790000	232280000	173220000			5.77135	7.63953	5.88443	129220000	168390000	119910000			7.60073	8.69783	5.82596
gi|116077368	31715000	12528000	20232000			1.56815	0.634104	1.00534	23804000	28370000	24442000			0.694581	0.93307	0.830316	24765000	21172000	28596000			1.45668	1.0936	1.38937
gi|116077372	9189800	5006900	5175800			0.454389	0.253424	0.257189	28098000	27671000	26233000			0.819877	0.910081	0.891157	8983700	9730200	9508300			0.528422	0.502593	0.461972
gi|116077374	1763900032	1679399936	1130099968			87.216	85.0028	56.1554	2109100032	2056199936	4316599808			61.5418	67.627	146.639	2348900096	1265799936	1308400000			138.162	65.3822	63.5701
gi|116077377	676500	0	0			0.0334495	0	0	3262900	2660100	2471800			0.0952088	0.0874889	0.0839692	2145300	3522000	0			0.126187	0.181921	0
gi|116077378	64210000	61981000	111660000			3.17486	3.13717	5.54846	52185000	28811000	40445000			1.52272	0.947574	1.37395	54730000	36425000	56821000			3.21922	1.88146	2.76071
gi|116077379	10457000	11102000	18465000			0.517046	0.561927	0.917538	29273000	32800000	35866000			0.854162	1.07877	1.2184	22840000	20625000	25600000			1.34345	1.06534	1.24381
gi|116077380	13110000	18831000	16113000			0.648224	0.953131	0.800666	17230000	10730000	11585000			0.502757	0.352902	0.393552	1401400	2331300	3192000			0.0824304	0.120418	0.155087
gi|116077384	4657700	3407200	3843900			0.2303	0.172455	0.191006	8255100	8428800	7060300			0.240877	0.277218	0.239844	0	651950	740600			0	0.0336751	0.0359829
gi|116077385	6711300	6155200	13063000			0.33184	0.311545	0.649109	5251300	4672000	4631400			0.153229	0.153659	0.157333	8588900	8188000	9376600			0.5052	0.422934	0.455573
gi|116077386	27431000	23139000	22393000			1.35633	1.17118	1.11272	61834000	48378000	40007000			1.80427	1.59112	1.35907	36861000	38977000	51864000			2.16817	2.01327	2.51987
gi|116077387	3042500	2344700	3492800			0.150436	0.118677	0.17356	9957700	8808400	8724200			0.290558	0.289702	0.296369	7687500	8189800	7314400			0.452179	0.423027	0.355378
gi|116077391	44163000	49990000	50014000			2.18364	2.53024	2.48523	171690000	171100000	263950000			5.00978	5.62736	8.96661	74489000	88921000	60595000			4.38145	4.59303	2.94408
gi|116077392	1955100	0	5659300			0.0966699	0	0.281214	-	-	-			-	-	-	-	-	-			-	-	-
gi|116077393	38137000	39981000	33786000			1.88568	2.02364	1.67885	97689000	91583000	63493000			2.85049	3.0121	2.15691	25713000	27322000	24141000			1.51244	1.41126	1.17292
gi|116077394	0	0	3825600			0	0	0.190097	-	-	-			-	-	-	-	-	-			-	-	-
gi|116077395	157540000	154760000	172460000			7.78956	7.83317	8.56965	143100000	167690000	196720000			4.17554	5.51521	6.68275	53762000	40942000	33155000			3.16228	2.11477	1.61087
gi|116077398	2142500	1656000	2085900			0.105936	0.0838184	0.10365	7543800	6161900	4998000			0.220122	0.202661	0.169786	3053500	2801500	4062200			0.179607	0.144706	0.197367
gi|116077401	454689984	519609984	349680000			22.4821	26.3	17.3758	1228199936	1241699968	1383200000			35.8379	40.8387	46.9885	1118300032	1231600000	1173699968			65.7785	63.6157	57.0256
gi|116077402	14118000	15639000	11529000			0.698064	0.791568	0.572884	80212000	56483000	61630000			2.34052	1.85769	2.09362	12381000	18862000	11515000			0.728251	0.974277	0.559469
gi|116077405	16709000	12782000	11484000			0.826176	0.646961	0.570648	18578000	14752000	12387000			0.542091	0.485183	0.420797	13895000	12284000	11041000			0.817305	0.634504	0.53644
gi|116077407	3309500	2333500	1287000			0.163638	0.11811	0.0639519	8307100	7815200	3408800			0.242394	0.257037	0.1158	4370700	5321600	5620200			0.257085	0.274876	0.273064
gi|116077408	38263000	40357000	70459000			1.89191	2.04267	3.50116	127420000	167650000	165840000			3.71801	5.5139	5.63373	230980000	227400000	192300000			13.5863	11.7459	9.34312
gi|116077409	6760000	7440900	6506400			0.334248	0.376621	0.323307	11824000	11502000	9674700			0.345015	0.378293	0.328658	3783900	3857100	5075000			0.222569	0.19923	0.246575
gi|116077413	8717200	9128400	11637000			0.431022	0.462034	0.57825	25477000	18092000	22267000			0.743398	0.595034	0.756429	8956500	16190000	11848000			0.526822	0.83626	0.575649
gi|116077414	11830000	9855900	9248900			0.584934	0.498856	0.459584	8609100	7904700	7942900			0.251207	0.25998	0.269827	0	5402000	6020900			0	0.279029	0.292532
gi|116077415	0	259470	0			0	0.0131331	0	-	-	-			-	-	-	0	0	405280			0	0	0.019691
gi|116077417	96152000	112870000	92834000			4.75423	5.71291	4.61298	402369984	477230016	468209984			11.7408	15.6958	15.9055	99976000	86960000	94453000			5.8806	4.49174	4.58911
gi|116077418	1356600	1648000	1044100			0.0670771	0.0834135	0.051882	2360500	2067900	1961300			0.0688775	0.0680118	0.066627	0	0	193350			0	0	0.00939413
gi|116077419	89418000	97021000	113790000			4.42127	4.91072	5.6543	163990000	145520000	202980000			4.7851	4.78605	6.8954	25887000	83925000	87098000			1.52268	4.33497	4.23176
gi|116077420	3032100	2767300	2490100			0.149922	0.140067	0.123735	10995000	5982100	7166400			0.320825	0.196747	0.243449	2842400	1700500	4996200			0.16719	0.0878357	0.242746
gi|116077421	9998100	11299000	11135000			0.494356	0.571899	0.553306	50735000	46346000	47892000			1.48041	1.52429	1.62693	28121000	23975000	24342000			1.65408	1.23838	1.18268
gi|116077422	342710016	278430016	343169984			16.9453	14.0927	17.0523	502860000	463950016	592430016			14.673	15.259	20.1254	269460000	398900000	426300000			15.8497	20.6043	20.7123
gi|116077424	15531000	21215000	14985000			0.76793	1.0738	0.744615	36224000	25913000	20903000			1.05699	0.852261	0.710093	17001000	11815000	12970000			1	0.610279	0.630162
gi|116077425	87090000	75920000	116290000			4.30616	3.84269	5.77853	152430000	174990000	200930000			4.44778	5.7553	6.82576	171550000	126260000	155150000			10.0906	6.52169	7.53814
gi|116077426	1710800	2158900	1835000			0.0845905	0.109273	0.0911824	4658500	3276300	2234400			0.135931	0.107755	0.0759045	2729200	2200100	2174900			0.160532	0.113642	0.10567
gi|116077428	1277400	1134800	1605200			0.063161	0.0574379	0.0797635	-	-	-			-	-	-	-	-	-			-	-	-
gi|116077430	140610000	210850000	154300000			6.95246	10.6722	7.66727	137210000	212060000	186840000			4.00368	6.97451	6.34711	373870016	151230000	463809984			21.9911	7.81147	22.5347
gi|116077433	371920000	210750000	253120000			18.3896	10.6671	12.5777	231130000	218150000	129550000			6.74419	7.17481	4.40092	187950000	186320000	314700000			11.0552	9.62397	15.2901
gi|116077434	0	0	1446500			0	0	0.0718776	2559300	3320000	3345000			0.0746783	0.109193	0.113633	1030800	1982900	1269200			0.0606317	0.102423	0.0616655
gi|116077435	4240200	0	0			0.209657	0	0	-	-	-			-	-	-	-	-	-			-	-	-
gi|116077436	4228500	4656100	5249500			0.209078	0.235668	0.260851	13971000	13197000	7808400			0.407662	0.43404	0.265258	3602000	2905700	2734300			0.21187	0.150088	0.132849
gi|116077438	8795600	8477400	9097200			0.434898	0.429083	0.452046	25105000	22076000	13685000			0.732544	0.726065	0.464891	17252000	18793000	24765000			1.01476	0.970713	1.20324
gi|116077442	38241000	36538000	40386000			1.89083	1.84937	2.00681	77898000	71171000	92012000			2.273	2.34077	3.12573	85142000	71069000	68987000			5.00806	3.67092	3.35181
gi|116077445	26735000	23189000	37443000			1.32191	1.17371	1.86057	65326000	61376000	50778000			1.90616	2.01862	1.72497	28421000	36249000	39186000			1.67173	1.87237	1.9039
gi|116077446	1235900032	2062899968	2347300096			61.1091	104.414	116.639	4597700096	5199499776	5870400000			134.157	171.008	199.422	3531899904	4447000064	3305499904			207.747	229.7	160.601
gi|116077448	39896000	35047000	54905000			1.97266	1.7739	2.72827	37846000	36908000	37368000			1.10432	1.21388	1.26942	5870100	17646000	19879000			0.34528	0.911467	0.965844
gi|116077450	905840	1195900	1036100			0.0447892	0.0605304	0.0514845	4602700	3135100	4563100			0.134303	0.103111	0.155012	0	813520	279020			0	0.0420207	0.0135565
gi|116077451	9928400	6542200	8673600			0.49091	0.331133	0.430997	-	-	-			-	-	-	0	1407500	1317000			0	0.0727014	0.063988
gi|116077453	1975100	2062400	1760700			0.0976588	0.104388	0.0874904	5047700	4414800	3867600			0.147288	0.1452	0.131386	3105900	2035500	2970800			0.182689	0.105139	0.14434
gi|116077455	1767600000	1875100032	1853799936			87.3989	94.9081	92.1166	1932499968	2079600000	1932700032			56.3888	68.3966	65.6555	1981299968	1729799936	3133299968			116.54	89.3492	152.235
gi|116077457	27410000	28141000	17125000			1.35529	1.42436	0.850953	22707000	27866000	29386000			0.662572	0.916494	0.998267	27004000	31637000	28410000			1.58838	1.63414	1.38033
gi|116077459	205520	0	0			0.0101619	0	0	-	-	-			-	-	-	-	-	-			-	-	-
gi|116077461	13110000	18756000	13874000			0.648224	0.949334	0.689408	35648000	36961000	31071000			1.04018	1.21562	1.05551	27045000	30358000	20860000			1.59079	1.56808	1.01351
gi|116077463	14526000	11643000	16200000			0.718238	0.58931	0.804989	6939100	5928100	4913200			0.202477	0.194971	0.166906	4094400	3813100	5499300			0.240833	0.196958	0.26719
gi|116077464	13198000	18956000	15372000			0.652575	0.959457	0.763845	47851000	40852000	33694000			1.39625	1.34359	1.14461	6192000	16147000	12367000			0.364214	0.834039	0.600865
gi|116077465	6569500	6312400	8427400			0.324829	0.319502	0.418763	10398000	6615600	7682400			0.303405	0.217583	0.260978	4119100	3100500	2866100			0.242286	0.16015	0.139253
gi|116077467	6184800	5215200	6411000			0.305807	0.263967	0.318567	2537200	2245700	1776300			0.0740334	0.0738596	0.0603424	1775900	1960600	2735300			0.104459	0.101271	0.132898
gi|116077468	128260000	162230000	144320000			6.34181	8.21127	7.17136	255280000	228260000	175190000			7.44886	7.50732	5.95135	281200000	365630016	216900000			16.5402	18.8858	10.5383
gi|116077469	57547000	62390000	57675000			2.84541	3.15787	2.86591	171880000	193700000	160140000			5.01532	6.37066	5.44009	83322000	80503000	90504000			4.90101	4.15821	4.39724
gi|116077470	75999000	67321000	81057000			3.75777	3.40745	4.02778	53742000	61907000	63559000			1.56815	2.03608	2.15915	7451700	34483000	27488000			0.43831	1.78115	1.33554
gi|116077471	6697400	9368000	10269000			0.331153	0.474161	0.510274	7917700	6517200	6447400			0.231032	0.214346	0.219024	2599800	2916300	4484300			0.15292	0.150635	0.217875
gi|116077472	49169000	57776000	39500000			2.43116	2.92433	1.96278	19239000	25354000	22942000			0.561378	0.833876	0.779359	7952800	15062000	20377000			0.467784	0.777996	0.99004
gi|116077479	73168000	78175000	75612000			3.61779	3.95683	3.75721	129380000	150830000	180420000			3.7752	4.9607	6.12902	39861000	39005000	42372000			2.34463	2.01472	2.05869
gi|116077480	141420000	107630000	133510000			6.99251	5.44769	6.6342	144430000	89120000	107770000			4.21435	2.9311	3.66104	66686000	50248000	42542000			3.92248	2.59545	2.06695
gi|116077483	0	2313900	0			0	0.117118	0	-	-	-			-	-	-	-	-	-			-	-	-
gi|116077484	16686000	11277000	8330300			0.825039	0.570785	0.413938	63689000	47198000	67261000			1.85839	1.55231	2.28491	74700000	63589000	34222000			4.39386	3.28456	1.66271
gi|116077485	74322000	93009000	102060000			3.67485	4.70765	5.07143	105380000	107790000	149830000			3.0749	3.54514	5.08985	74898000	77442000	81315000			4.40551	4.0001	3.95078
gi|116077487	5542500	7930400	8805400			0.274049	0.401397	0.437546	11889000	10200000	8567000			0.346911	0.335471	0.291028	1853900	2504800	2081800			0.109047	0.12938	0.101147
gi|116077488	831430016	842870016	878289984			41.11	42.6618	43.6428	423950016	500040000	675680000			12.3705	16.446	22.9534	349100000	659680000	672969984			20.5341	34.0744	32.697
gi|116077489	229640000	309969984	311340000			11.3545	15.6891	15.4707	620060032	794190016	805430016			18.0928	26.1204	27.3611	203750000	412820000	396420000			11.9846	21.3233	19.2605
gi|116077491	4963400	3834000	4826700			0.245415	0.194058	0.239842	62836000	49420000	48237000			1.8335	1.62539	1.63865	19366000	19360000	18808000			1.13911	1	0.913808
gi|116077493	5168900096	5476100096	4061900032			255.576	277.173	201.839	3290899968	3432399872	4211200000			96.0258	112.889	143.058	8816400384	8638400512	7437599744			518.581	446.198	361.364
gi|116077494	338529984	221900000	375289984			16.7386	11.2315	18.6484	299880000	337020000	393160000			8.75026	11.0844	13.356	184400000	220460000	300180000			10.8464	11.3874	14.5846
gi|116077495	9414400	10016000	8250500			0.465495	0.50696	0.409973	42253000	69050000	124300000			1.23291	2.27101	4.22258	45021000	29819000	21491000			2.64814	1.54024	1.04416
gi|116077497	0	102220000	71616000			0	5.17386	3.55865	170190000	143140000	265280000			4.96601	4.70778	9.01179	210510000	224470000	142060000			12.3822	11.5945	6.90215
gi|116077498	97215000	104640000	96406000			4.80679	5.29635	4.79048	80639000	120960000	116030000			2.35298	3.97829	3.94164	29188000	41505000	42342000			1.71684	2.14385	2.05723
gi|116077499	398600	0	0			0.0197088	0	0	1469000	5980700	2283400			0.0428642	0.196701	0.077569	332370	416340	0			0.01955	0.0215052	0
gi|116077500	931460	858800	0			0.046056	0.0434681	0	5102200	0	6825300			0.148878	0	0.231861	2293200	1686700	0			0.134886	0.0871229	0
gi|116077501	1108800	1315100	1300100			0.0548246	0.0665637	0.0646028	942220	0	0			0.0274932	0	0	0	440780	0			0	0.0227676	0
gi|116077503	24439000	18344000	22096000			1.20839	0.928481	1.09797	6469500	6346700	10542000			0.188775	0.208739	0.358121	13485000	7527200	10317000			0.793189	0.388802	0.501263
gi|116077504	4851000	5448000	6934100			0.239858	0.27575	0.34456	4024900	4337700	4800700			0.117443	0.142664	0.163084	1437300	377480	1394700			0.0845421	0.0194979	0.0677631
gi|116077505	170600000	89073000	141300000			8.43531	4.50843	7.02129	342240000	430630016	253710000			9.98629	14.1631	8.61875	186100000	259570000	210900000			10.9464	13.4075	10.2468
gi|116077508	11466000	10351000	11876000			0.566936	0.523916	0.590126	54409000	50249000	59764000			1.58761	1.65266	2.03023	12380000	16670000	14068000			0.728192	0.861054	0.68351
gi|116077509	120250000	78877000	113190000			5.94576	3.99236	5.62449	115160000	96108000	106970000			3.36028	3.16093	3.63386	63848000	36975000	65247000			3.75554	1.90987	3.1701
gi|116077510	11549000	10252000	10509000			0.57104	0.518905	0.522199	44354000	32398000	24562000			1.29421	1.06555	0.834392	6559000	5635500	4945000			0.385801	0.29109	0.240258
gi|116077513	1342500	0	1327900			0.0663799	0	0.0659842	5782400	5989800	3612600			0.168726	0.197	0.122723	1963400	1943900	3374400			0.115487	0.100408	0.163949
gi|116077514	81771000	92378000	61421000			4.04317	4.67571	3.05205	75517000	82923000	113330000			2.20352	2.72728	3.84992	176440000	150490000	140030000			10.3782	7.77324	6.80352
gi|116077515	84782000	74032000	70470000			4.19204	3.74713	3.5017	63478000	43214000	50058000			1.85224	1.42128	1.70051	122860000	113870000	116940000			7.22663	5.88171	5.68166
gi|116077516	6057099776	6495499776	6125899776			299.493	328.77	304.4	9265200128	7396899840	12049000448			270.351	243.279	409.315	12707999744	17227999232	11315000320			747.485	889.876	549.752
gi|116077517	29382000	17056000	36221000			1.45279	0.863289	1.79985	9327800	11791000	15522000			0.272178	0.387798	0.527296	3805800	4801500	5615000			0.223857	0.248011	0.272811
gi|116077518	271780000	312440000	364080000			13.4382	15.8141	18.0914	520240000	672680000	774000000			15.1802	22.124	26.2934	436889984	336620000	433150016			25.6979	17.3874	21.0451
gi|116077519	3249200	884560	1123300			0.160657	0.044772	0.0558175	-	-	-			-	-	-	-	-	-			-	-	-
gi|116077520	35767000	32171000	34915000			1.7685	1.62833	1.73495	148920000	124860000	126180000			4.34536	4.10656	4.28644	44793000	53719000	43853000			2.63473	2.77474	2.13065
gi|116077522	174920000	210380000	233510000			8.64892	10.6484	11.6033	577649984	696049984	695240000			16.8554	22.8926	23.6179	275950016	408600000	263600000			16.2314	21.1054	12.8073
gi|116077525	562500	401520	651210			0.0278128	0.0203229	0.0323591	757530	882700	0			0.0221041	0.0290314	0	0	1006700	900390			0	0.051999	0.0437465
gi|116077526	5410400	0	2543300			0.267517	0	0.126378	17914000	10345000	13831000			0.522716	0.34024	0.469851	5110100	5717900	0			0.300576	0.295346	0
gi|116077527	217470000	282720000	177820000			10.7528	14.3099	8.836	540430016	504510016	590329984			15.7693	16.593	20.054	365640000	339440000	237420000			21.507	17.5331	11.5353
gi|116077528	108460000	109710000	106370000			5.3628	5.55297	5.2856	70349000	109850000	96445000			2.05273	3.61289	3.27632	145960000	131390000	118160000			8.58538	6.78667	5.74094
gi|116077529	465900000	446769984	560060032			23.0364	22.6133	27.8298	594860032	646520000	611750016			17.3575	21.2636	20.7817	914489984	793809984	747600000			53.7904	41.0026	36.323
gi|116077531	430689984	312350016	377860000			21.2955	15.8096	18.7761	1051299968	918860032	820240000			30.6761	30.2207	27.8643	310430016	290520000	256050000			18.2595	15.0062	12.4405
gi|116077532	1423300	1195300	2652000			0.070375	0.0605001	0.13178	2058800	2306900	2477900			0.0600741	0.0758724	0.0841764	4808000	3938400	6237900			0.282807	0.20343	0.303076
gi|116077535	5933900	4246400	5329100			0.293402	0.214931	0.264807	4385600	0	4375100			0.127968	0	0.148626	4158700	0	6777600			0.244615	0	0.329297
gi|116077536	4390700	5723500	8140400			0.217098	0.289695	0.404502	2769300	5589900	3837500			0.0808059	0.183848	0.130363	3536300	4661200	4933200			0.208005	0.240764	0.239685
gi|116077537	5780000	6743500	7517900			0.285792	0.341322	0.37357	6939900	8264800	12446000			0.202501	0.271824	0.422801	10678000	9931000	11506000			0.628081	0.512965	0.559032
gi|116077541	2846400000	2732699904	3025999872			140.74	138.316	150.364	3269600000	3080900096	4221799936			95.4043	101.329	143.418	2146300032	2606899968	2573400064			126.246	134.654	125.032
gi|116077542	86929000	77321000	71961000			4.2982	3.9136	3.57579	27910000	27739000	32737000			0.814391	0.912317	1.1121	17872000	11670000	10385000			1.05123	0.602789	0.504567
gi|116077543	996940	1171000	1571100			0.0492937	0.0592701	0.078069	0	1066000	0			0	0.03506	0	815510	964660	1351000			0.0479684	0.0498275	0.0656399
gi|116077545	1495300	0	1209800			0.0739351	0	0.0601158	0	4961700	0			0	0.163187	0	-	-	-			-	-	-
gi|116077548	423369984	224770000	389580000			20.9335	11.3767	19.3585	77880000	133740000	117410000			2.27248	4.39862	3.98852	375470016	308289984	352809984			22.0852	15.9241	17.1417
gi|116077550	86258000	83735000	79573000			4.26503	4.23824	3.95404	95129000	87927000	72210000			2.77579	2.89186	2.45304	12237000	25249000	46029000			0.719781	1.30418	2.23637
gi|116077551	184600000	189640000	216960000			9.12754	9.59862	10.7809	288160000	345720000	310350016			8.40828	11.3705	10.5429	103400000	86264000	91640000			6.082	4.45579	4.45243
gi|116077556	1889100	1967200	1773600			0.0934065	0.0995698	0.0881314	3604900	0	2625600			0.105188	0	0.0891939	3563900	4641900	4841300			0.209629	0.239768	0.23522
gi|116077560	51655000	44151000	36883000			2.55408	2.2347	1.83274	131240000	121440000	117440000			3.82948	3.99408	3.98954	136660000	134060000	150490000			8.03835	6.92459	7.31173
gi|116077561	1858300	1959800	3424000			0.0918836	0.0991952	0.170141	7631400	7096100	5510300			0.222678	0.233386	0.18719	0	1368100	0			0	0.0706663	0
gi|116077564	5177100	9547400	9069900			0.255982	0.483241	0.450689	7334700	8009300	6518600			0.214021	0.26342	0.221442	-	-	-			-	-	-
gi|116077566	18777000	20333000	19159000			0.928428	1.02915	0.952024	194460000	206140000	225190000			5.67419	6.77981	7.6499	27993000	30668000	26148000			1.64655	1.58409	1.27043
gi|116077567	58871000	70140000	60902000			2.91088	3.55013	3.02626	99285000	122440000	115170000			2.89706	4.02697	3.91242	10274000	20596000	21126000			0.604317	1.06384	1.02643
gi|116077568	213810000	153500000	181390000			10.5718	7.7694	9.01339	318700000	336820000	284649984			9.29941	11.0778	9.6698	194300000	219010000	272329984			11.4287	11.3125	13.2315
gi|116077569	2848000	4048000	2536500			0.140819	0.204889	0.12604	22590000	17317000	19340000			0.659158	0.569544	0.656996	2971600	0	3733300			0.17479	0	0.181387
gi|116077571	227640000	111960000	78504000			11.2557	5.66685	3.90092	359809984	476880000	552499968			10.499	15.6843	18.7689	84174000	47659000	76927000			4.95112	2.46173	3.73759
gi|116077572	87377000	97846000	73887000			4.32035	4.95247	3.67149	150810000	120520000	121510000			4.40051	3.96382	4.1278	103640000	92470000	96056000			6.09611	4.77634	4.66699
gi|116077573	7411600	6407900	6204300			0.366466	0.324336	0.308296	0	733420	0			0	0.0241217	0	6796800	12792000	5347300			0.399788	0.660744	0.259805
gi|116077574	8617400	10644000	10050000			0.426087	0.538746	0.499391	8221800	6472000	8579200			0.239905	0.21286	0.291443	1419300	1033500	1102100			0.0834833	0.0533833	0.0535468
gi|116077575	362529984	337209984	396680000			17.9253	17.0679	19.7113	856040000	700729984	749529984			24.9786	23.0465	25.4622	746339968	745699968	438980000			43.8998	38.5176	21.3283
gi|116077576	3126400	3476100	4450500			0.154585	0.175943	0.221148	3390000	3859800	2914100			0.0989175	0.126946	0.0989945	0	1647100	1474400			0	0.0850775	0.0716354
gi|116077578	1816000	1509400	1996700			0.0897921	0.0763982	0.0992174	-	-	-			-	-	-	-	-	-			-	-	-
gi|116077580	1016099968	722729984	770320000			50.241	36.581	38.2777	436100000	621809984	575920000			12.725	20.4509	19.5645	564190016	465089984	437550016			33.1857	24.0232	21.2589
gi|116077581	457100000	515110016	523420000			22.6013	26.0723	26.0091	851139968	907939968	959059968			24.8356	29.8615	32.5801	333849984	544689984	442700000			19.6371	28.1348	21.5091
gi|116077587	71173000	72923000	108750000			3.51915	3.691	5.40386	190210000	225050000	235070000			5.55017	7.40174	7.98553	142410000	77420000	206150000			8.37657	3.99897	10.016
gi|116077591	38679000	40909000	33560000			1.91248	2.07061	1.66762	101020000	132000000	83681000			2.94768	4.34139	2.84271	29528000	67899000	50881000			1.73684	3.50718	2.47211
gi|116077592	1754600	2933100	3128000			0.0867562	0.148459	0.155432	10763000	6763300	8701000			0.314056	0.22244	0.29558	1892400	1840300	1664700			0.111311	0.0950568	0.0808814
gi|116077593	13089000	9039300	8914000			0.647185	0.457524	0.442943	34271000	27004000	33882000			1	0.888143	1.151	8110800	13680000	9536900			0.477078	0.706612	0.463361
gi|116077602	1384300032	1511800064	1847699968			68.4467	76.5197	91.8135	2716400128	2780100096	1456099968			79.2624	91.4356	49.465	3092100096	3699599872	3696699904			181.878	191.095	179.608
gi|116077604	657409984	628009984	733800000			32.5056	31.7867	36.463	608259968	665529984	1057500032			17.7485	21.8888	35.9242	334049984	464660000	446729984			19.6488	24.001	21.7049
gi|116077605	594090	513190	840180			0.0293748	0.0259751	0.0417491	0	0	818640			0	0	0.0278099	0	320080	303790			0	0.0165331	0.01476
gi|116077606	683600	973170	1296400			0.0338006	0.049257	0.064419	-	-	-			-	-	-	-	-	-			-	-	-
gi|116077607	3576400	2750200	4483500			0.176835	0.139201	0.222788	4064800	3327200	3329000			0.118608	0.109429	0.113089	0	0	990810			0	0	0.0481396
gi|116077610	23592000	11736000	10828000			1.16651	0.594017	0.538051	28987000	21062000	7822800			0.845817	0.692715	0.265747	1470400	2085800	1253800			0.086489	0.107738	0.0609173
gi|116077611	40629000	41127000	54020000			2.0089	2.08164	2.68429	63154000	41868000	42546000			1.84278	1.37701	1.44532	17101000	25146000	14945000			1.00588	1.29886	0.72612
gi|116077613	9399200	13037000	18660000			0.464743	0.659867	0.927228	20802000	18809000	20110000			0.606985	0.618615	0.683154	16926000	15008000	16813000			0.995588	0.775207	0.816879
gi|116077617	0	657680	636240			0	0.0332885	0.0316152	1762400	1875600	2264600			0.0514254	0.0616872	0.0769304	978890	1173800	899000			0.0575784	0.0606302	0.0436789
gi|116077618	46889000	33540000	48946000			2.31843	1.69763	2.43216	29122000	42149000	50355000			0.849756	1.38625	1.7106	64075000	30324000	41574000			3.7689	1.56632	2.01992
gi|116077619	5146600	6535200	4925100			0.254474	0.330779	0.244732	2364000	3111100	3784800			0.0689796	0.102322	0.128573	4303700	4035300	4740100			0.253144	0.208435	0.230303
gi|116077620	0	0	885370			0	0	0.0439946	2555400	0	967530			0.0745645	0	0.0328678	-	-	-			-	-	-
gi|116077621	157610000	212470000	156580000			7.79302	10.7542	7.78057	143410000	122990000	131000000			4.18459	4.04506	4.45018	134580000	175830000	128610000			7.916	9.08213	6.24866
gi|116077623	4720000	2851900	8964500			0.23338	0.144349	0.445452	-	-	-			-	-	-	0	629810	0			0	0.0325315	0
gi|116077624	322400000	306900000	262700000			15.9411	15.5337	13.0537	388150016	386310016	391889984			11.3259	12.7055	13.3128	101400000	122700000	119840000			5.96436	6.33781	5.82256
gi|116077630	2779200	0	3236700			0.137417	0	0.160834	-	-	-			-	-	-	-	-	-			-	-	-
gi|116077633	2635100	3286800	4016400			0.130292	0.166361	0.199578	5519900	6663000	6189900			0.161066	0.219142	0.210276	0	1508400	2217500			0	0.0779132	0.10774
gi|116077635	17414000	21294000	23238000			0.861035	1.0778	1.15471	5564000	5997700	6750600			0.162353	0.19726	0.229324	9269900	7736000	11103000			0.545256	0.399587	0.539452
gi|116077638	8187000	9768700	12258000			0.404806	0.494442	0.609108	50688000	40796000	34290000			1.47903	1.34175	1.16486	4233300	8094200	5420000			0.249003	0.418089	0.263337
gi|116077639	11939000	8163500	7653800			0.590324	0.413195	0.380322	14161000	12495000	11660000			0.413207	0.410952	0.3961	0	2373500	3486700			0	0.122598	0.169405
gi|116077640	847300	920470	1035200			0.0418947	0.0465896	0.0514398	1220600	1117900	977550			0.0356161	0.036767	0.0332082	961830	1670100	1386400			0.0565749	0.0862655	0.0673598
gi|116077641	106450000	113940000	105250000			5.26342	5.76707	5.22994	238450000	276030016	220890000			6.95778	9.07844	7.50382	127510000	63831000	210860000			7.50015	3.29706	10.2449
gi|116077645	450150016	279750016	502140000			22.2577	14.1595	24.9517	257580000	342049984	449129984			7.51598	11.2498	15.2573	212870000	294940000	183890000			12.521	15.2345	8.93451
gi|116077646	5023100	6833900	6059800			0.248367	0.345898	0.301116	5792300	5144700	4768900			0.169015	0.169206	0.162004	13334000	17047000	15841000			0.784307	0.880527	0.769653
gi|116077648	114120000	107960000	106910000			5.64266	5.46439	5.31243	243780000	400750016	221200000			7.1133	13.1804	7.51435	4946200	8189200	6889700			0.290936	0.422996	0.334744
gi|116077649	4423800	3991400	2748100			0.218735	0.202025	0.136555	13388000	15706000	13358000			0.390651	0.51656	0.453783	7500900	6320100	6244300			0.441203	0.326451	0.303386
gi|116077650	9014800	13435000	8922100			0.445737	0.680012	0.443345	12613000	10527000	14227000			0.368037	0.346226	0.483303	12226000	3345300	6849700			0.719134	0.172794	0.332801
gi|116077651	103070000	95368000	112940000			5.09629	4.82705	5.61206	254160000	342750016	457110016			7.41618	11.2728	15.5284	85976000	102160000	94221000			5.05711	5.27686	4.57784
gi|116077652	4694700	4521600	5169700			0.232129	0.228861	0.256886	4992300	4000900	2926400			0.145671	0.131587	0.0994123	0	451350	547410			0	0.0233135	0.0265965
gi|116077653	393820	591600	353390			0.0194724	0.0299438	0.0175602	6239900	3580500	5229200			0.182075	0.11776	0.17764	1074500	720600	904140			0.0632022	0.0372211	0.0439287
gi|116077654	0	0	8283200			0	0	0.411598	174840000	175760000	132460000			5.10169	5.78063	4.49978	0	50002000	54443000			0	2.58275	2.64518
gi|116077656	335990	352150	493450			0.016613	0.0178241	0.0245199	-	-	-			-	-	-	522470	521940	650260			0.0307317	0.0269597	0.0315936
gi|116077658	4254200	5120900	5292900			0.210349	0.259194	0.263008	7960400	7281000	6362300			0.232278	0.239467	0.216133	1893300	2544000	2955700			0.111364	0.131405	0.143606
gi|116077659	193600000	165410000	115630000			9.57255	8.37222	5.74573	571710016	621680000	857710016			16.682	20.4466	29.1371	515449984	363740000	407620000			30.3188	18.7882	19.8047
gi|116077660	34608000	39500000	36899000			1.71119	1.99929	1.83354	143330000	125530000	150870000			4.18225	4.1286	5.12518	70662000	51012000	74532000			4.15634	2.63492	3.62122
gi|116077661	30432000	28366000	35324000			1.50471	1.43574	1.75527	66242000	70455000	88590000			1.93289	2.31722	3.00948	13569000	13094000	12108000			0.79813	0.676343	0.588281
gi|116077663	36724000	43162000	50661000			1.81582	2.18464	2.51738	93878000	80129000	49750000			2.73928	2.63539	1.69005	33626000	31578000	31072000			1.97788	1.6311	1.50967
gi|116077665	457350	608920	469980			0.0226137	0.0308205	0.0233536	8033700	9993100	7139200			0.234417	0.328666	0.242525	4403800	4477100	4341300			0.259032	0.231255	0.210927
gi|116077666	320520000	321760000	297240000			15.8481	16.2859	14.7701	425449984	327990016	339270016			12.4143	10.7874	11.5253	121370000	216720000	246970000			7.13899	11.1942	11.9993
gi|116077667	2132200	2705100	2841700			0.105427	0.136919	0.141206	2908100	2237700	2369000			0.084856	0.0735964	0.080477	710800	678390	710740			0.0418093	0.0350408	0.0345321
gi|116077669	5961200	5712100	5518800			0.294751	0.289118	0.274233	8747800	6848000	11054000			0.255254	0.225226	0.375514	2616700	8553800	3672400			0.153914	0.441829	0.178428
gi|116077671	128680000	114820000	206620000			6.36258	5.81161	10.2671	135290000	121360000	173770000			3.94765	3.99145	5.90312	141140000	163980000	125440000			8.30186	8.47004	6.09465
gi|116077672	4559300	3407300	3136000			0.225434	0.17246	0.15583	8234100	8275400	8558400			0.240264	0.272172	0.290736	0	1078800	876580			0	0.0557231	0.0425896
gi|116077673	35955000	34879000	28084000			1.77779	1.7654	1.39551	125000000	133100000	166160000			3.6474	4.37757	5.6446	130040000	112770000	112210000			7.64896	5.8249	5.45185
gi|116077674	1280199936	1593299968	1596899968			63.2995	80.6448	79.351	521449984	447049984	502809984			15.2155	14.7032	17.0809	840249984	725910016	776200000			49.4236	37.4954	37.7126
gi|116077675	27885000	33362000	36912000			1.37877	1.68862	1.83418	45998000	40831000	31993000			1.34218	1.3429	1.08683	21833000	53060000	33572000			1.28422	2.7407	1.63113
gi|116077677	39868000	43579000	36418000			1.97127	2.20575	1.80964	42170000	37603000	39713000			1.23049	1.23674	1.34908	14385000	9941400	9052300			0.846127	0.513502	0.439816
gi|116077678	2534599936	2025100032	2168699904			125.323	102.5	107.764	2908199936	3790500096	3489799936			84.8589	124.667	118.551	3416699904	3380199936	3067000064			200.971	174.597	149.014
gi|116077679	37671000	50556000	45380000			1.86264	2.55889	2.25496	318460000	327380000	342940000			9.2924	10.7673	11.65	25399000	55522000	46580000			1.49397	2.86787	2.26314
gi|116077680	71162000	73889000	79222000			3.5186	3.73989	3.93659	65915000	46200000	46832000			1.92335	1.51949	1.59092	47975000	41379000	52077000			2.82189	2.13735	2.53022
gi|116077681	3100499968	2607899904	1607299968			153.304	131.999	79.8678	748000000	1033400000	2732100096			21.826	33.9878	92.8118	3752800000	2821100032	3582500096			220.74	145.718	174.06
gi|116077682	25032000	29471000	39310000			1.23771	1.49167	1.95334	36838000	37858000	31203000			1.0749	1.24512	1.05999	5726900	8073700	8183300			0.336857	0.41703	0.397595
gi|116077683	131690000	186640000	107000000			6.51141	9.44678	5.3169	82201000	62824000	62725000			2.39856	2.06624	2.13082	4545900	16109000	21681000			0.26739	0.832076	1.0534
gi|116077684	12556000	8872600	8480300			0.620831	0.449086	0.421392	8179200	8729500	7530800			0.238662	0.287107	0.255828	10078000	6412200	12363000			0.592789	0.331209	0.60067
gi|116077685	80539000	65643000	65041000			3.98225	3.32252	3.23193	160320000	132120000	128580000			4.67801	4.34534	4.36797	101810000	110260000	151190000			5.98847	5.69525	7.34574
gi|116077689	7151300	7661100	10388000			0.353596	0.387766	0.516187	-	-	-			-	-	-	3014700	4716900	0			0.177325	0.243642	0
gi|116077690	0	8039000	9594500			0	0.406894	0.476757	-	-	-			-	-	-	-	-	-			-	-	-
gi|116077691	5348300	4979700	4919000			0.264447	0.252047	0.244428	2963300	2657900	2324600			0.0864667	0.0874165	0.0789686	0	683170	1104900			0	0.0352877	0.0536828
gi|116077693	13548000	11873000	15468000			0.669881	0.600952	0.768615	19487000	12665000	20195000			0.568615	0.416543	0.686041	18478000	12758000	13416000			1.08688	0.658988	0.651832
gi|116077694	1452700	1295900	1037300			0.0718287	0.0655919	0.0515441	2938900	2029000	2068700			0.0857547	0.0667324	0.0702755	0	431610	0			0	0.0222939	0
gi|116077697	523810	0	0			0.0258998	0	0	1162900	1346500	1597900			0.0339325	0.0442855	0.054282	278860	176340	0			0.0164026	0.00910847	0
gi|116077698	41538000	45618000	44019000			2.05385	2.30895	2.18733	43893000	44746000	53242000			1.28076	1.47167	1.80868	47138000	45867000	41815000			2.77266	2.36916	2.03163
gi|116077700	25387000	20773000	17618000			1.25526	1.05142	0.87545	22401000	19422000	21787000			0.653643	0.638777	0.740123	788390	11781000	10094000			0.0463732	0.608523	0.490429
gi|116077701	7981200	7003800	6420700			0.39463	0.354497	0.319049	48266000	31187000	37484000			1.40836	1.02572	1.27336	10804000	6965800	5337600			0.635492	0.359804	0.259333
gi|116077702	201340000	250220000	260450000			9.95525	12.6649	12.9419	182370000	190110000	249330000			5.32141	6.25259	8.46995	53080000	63276000	68155000			3.12217	3.26839	3.31139
gi|116077703	28427000	22937000	18213000			1.40557	1.16096	0.905016	40860000	40187000	38269000			1.19226	1.32172	1.30003	10397000	14230000	20087000			0.611552	0.735021	0.97595
gi|116077704	2316300032	2319800064	2794200064			114.529	117.417	138.846	1864700032	1428899968	1745500032			54.4104	46.9956	59.2961	777800000	957320000	766140032			45.7502	49.4483	37.2238
gi|116077705	150820000	165990000	185590000			7.45729	8.40158	9.22209	52210000	44401000	53574000			1.52345	1.46032	1.81995	141410000	152200000	115800000			8.31775	7.86157	5.62628
gi|116077706	26379000	33203000	35001000			1.30431	1.68057	1.73922	74767000	137480000	137800000			2.18164	4.52162	4.68118	9650500	9219200	9768500			0.567643	0.476198	0.474614
gi|116077707	48867000	77091000	69303000			2.41623	3.90196	3.44371	1447100	0	1236200			0.0422252	0	0.0419948	12998000	13974000	15469000			0.764543	0.721798	0.751579
gi|116077708	27513000	49143000	16789000			1.36038	2.48737	0.834257	4601800	3459000	5539300			0.134277	0.113764	0.188175	3495100	10361000	6251900			0.205582	0.535176	0.303756
gi|116077709	814819968	676240000	398729984			40.2888	34.2279	19.8132	794480000	591180032	926419968			23.1823	19.4435	31.4713	1694599936	1460000000	1307600000			99.6765	75.4132	63.5312
gi|116077710	0	1247300	0			0	0.0631321	0	5114800	3726100	4354000			0.149246	0.122549	0.147909	2072700	0	0			0.121916	0	0
gi|116077713	1803800	1277200	1328000			0.0891889	0.0646454	0.0659892	1010600	593280	1072700			0.0294885	0.0195126	0.0364405	325060	0	0			0.0191201	0	0
gi|116077714	22577000	17991000	17926000			1.11632	0.910614	0.890755	126890000	125120000	104950000			3.70255	4.11511	3.56524	32434000	36597000	26777000			1.90777	1.89034	1.30099
gi|116077715	1931200	2697200	2811200			0.0954881	0.136519	0.13969	7310400	5434000	5417000			0.213312	0.178721	0.18402	0	16819000	14365000			0	0.86875	0.69794
gi|116077716	6484400	6942800	5434600			0.320621	0.35141	0.270049	6037300	2746400	3608400			0.176164	0.0903272	0.12258	6336900	3401500	3627600			0.372737	0.175697	0.176251
gi|116077717	12113000	11463000	12488000			0.598927	0.580199	0.620537	5556400	5976700	5702600			0.162131	0.19657	0.193722	14787000	11850000	10911000			0.869772	0.612087	0.530123
gi|116077718	92432000	92132000	82323000			4.5703	4.66326	4.09069	109460000	98580000	92299000			3.19395	3.24223	3.13548	82154000	102290000	104680000			4.8323	5.28357	5.086
gi|116077719	2981400	4610400	2388200			0.147415	0.233355	0.118671	3020900	2345800	2744300			0.0881474	0.0771518	0.0932262	3098700	3582700	3011800			0.182266	0.185057	0.146332
gi|116077725;gi|116076381	725360000	604350016	753790016			35.8654	30.5892	37.4563	924350016	1036400000	1110099968			26.9718	34.0865	37.711	650969984	846249984	855689984			38.2901	43.7113	41.5747
gi|116077726	155360000	136420000	173270000			7.68177	6.90489	8.6099	496110016	670150016	820430016			14.4761	22.0408	27.8707	720019968	545379968	593640000			42.3516	28.1705	28.8427
gi|116077727	2770700032	2736100096	2695000064			136.997	138.488	133.916	2672699904	1820000000	2181400064			77.9872	59.8586	74.104	4883100160	4202800128	2067200000			287.224	217.087	100.437
gi|116077729	88170000	88752000	73949000			4.35956	4.49218	3.67458	135860000	118890000	113980000			3.96428	3.91021	3.872	58247000	55786000	63664000			3.42609	2.88151	3.09319
gi|116077730	9391000	8697700	11468000			0.464338	0.440234	0.569853	18958000	18693000	19190000			0.553179	0.6148	0.651901	2512900	2353600	1782200			0.147809	0.12157	0.0865902
gi|116077731	1384700032	1542899968	1252499968			68.4665	78.0938	62.2376	813609984	877500032	1130000000			23.7405	28.8604	38.3871	3491000064	3015399936	2464399872			205.341	155.754	119.736
gi|116077732	21472000	23019000	23453000			1.06168	1.16511	1.1654	27138000	25278000	30943000			0.791865	0.831376	1.05116	22570000	22832000	24067000			1.32757	1.17934	1.16932
gi|116077733	74049000	86524000	55323000			3.66135	4.37941	2.74904	126390000	162230000	83353000			3.68796	5.33564	2.83157	64136000	71450000	104680000			3.77248	3.6906	5.086
gi|116077734	0	297810	1387300			0	0.0150736	0.0689359	0	7968400	775580			0	0.262075	0.0263471	0	571490	0			0	0.0295191	0
gi|116077735	17672000	15132000	19369000			0.873792	0.765906	0.962459	4992600	4620500	5017800			0.14568	0.151965	0.170459	3682800	5975800	6301300			0.216623	0.308667	0.306156
gi|116077737	0	0	930600			0	0	0.0462421	-	-	-			-	-	-	-	-	-			-	-	-
gi|116077738	394249984	387680000	636400000			19.4937	19.6224	31.6231	357209984	320460000	334009984			10.4231	10.5397	11.3466	24733000	90473000	72177000			1.4548	4.67319	3.5068
gi|116077739	0	0	749680			0	0	0.0372521	-	-	-			-	-	-	-	-	-			-	-	-
gi|116077740	2592200	2723300	3128300			0.128171	0.13784	0.155447	17138000	18183000	24362000			0.500073	0.598027	0.827598	9686500	0	4780800			0.569761	0	0.232281
gi|116077743	97678000	91143000	85481000			4.82969	4.6132	4.24761	75378000	55957000	67775000			2.19947	1.84039	2.30237	53121000	62436000	77163000			3.12458	3.225	3.74905
gi|116077744	94394000	82902000	69966000			4.66731	4.19608	3.47666	427700000	339750016	406360000			12.4799	11.1741	13.8044	254030000	228430000	247990000			14.9421	11.7991	12.0489
gi|116077747	341890	333590	735260			0.0169047	0.0168846	0.0365356	2477200	2170600	1599600			0.0722827	0.0713896	0.0543398	0	620760	0			0	0.032064	0
gi|116077748	92170000	102340000	120390000			4.55734	5.17994	5.98226	250530000	273280000	230650000			7.31026	8.988	7.83538	63885000	90754000	91906000			3.75772	4.68771	4.46536
gi|116077751	370500	595760	0			0.0183194	0.0301544	0	-	-	-			-	-	-	-	-	-			-	-	-
gi|116077752	15968000	18730000	18845000			0.789537	0.948018	0.936421	58627000	33717000	27341000			1.71069	1.10893	0.928797	5442000	5450300	2175400			0.320099	0.281524	0.105694
gi|116077753	1651500	1476800	1804000			0.0816584	0.0747482	0.089642	2584700	2335200	2678000			0.0754195	0.0768032	0.0909739	1873600	1060300	2468100			0.110205	0.0547676	0.119915
gi|116077754	536089984	570380032	634099968			26.507	28.8698	31.5089	333790016	275840000	376470016			9.73972	9.07219	12.789	86059000	135270000	134740000			5.062	6.98709	6.5465
gi|116077756	1426400	1838500	1585000			0.0705283	0.0930556	0.0787597	2759500	0	2070100			0.08052	0	0.0703231	0	395660	0			0	0.020437	0
gi|116077757	2424500	2566600	2498600			0.119879	0.129908	0.124157	2708100	1970100	2392000			0.0790202	0.0647953	0.0812583	5771400	3963000	2871000			0.339474	0.2047	0.139491
gi|116077758	28265000	29514000	35364000			1.39756	1.49385	1.75726	29899000	32624000	35482000			0.872429	1.07298	1.20535	-	-	-			-	-	-
gi|116077760	0	201840	0			0	0.0102161	0	-	-	-			-	-	-	-	-	-			-	-	-
gi|116077763	376410	0	336480			0.0186116	0	0.0167199	-	-	-			-	-	-	0	1748900	2415800			0	0.0903357	0.117374
gi|116077764	317140000	345550016	395340000			15.681	17.49	19.6447	359620000	354369984	382289984			10.4934	11.655	12.9867	301950016	309150016	357809984			17.7607	15.9685	17.3846
gi|116077765	12298000	10801000	11938000			0.608074	0.546692	0.593207	23738000	19154000	16403000			0.692656	0.629962	0.557224	2339200	5860800	6466500			0.137592	0.302727	0.314182
gi|116077767	0	0	794700			0	0	0.0394892	11696000	9804700	8141800			0.34128	0.32247	0.276584	1128300	1019400	1407500			0.0663667	0.052655	0.068385
gi|116077770	0	0	304360			0	0	0.0151239	-	-	-			-	-	-	-	-	-			-	-	-
gi|116077772	1940499968	1982499968	2182700032			95.948	100.344	108.46	2959500032	2922200064	2235800064			86.3558	96.1092	75.952	3371399936	3375000064	3709499904			198.306	174.329	180.23
gi|116077773	1650599936	1319299968	1461100032			81.6139	66.7763	72.603	584700032	419489984	382350016			17.0611	13.7967	12.9888	854470016	890190016	762969984			50.26	45.9809	37.0698
gi|116077775	11346000	13531000	16788000			0.561003	0.684871	0.834207	31471000	26503000	25259000			0.918298	0.871666	0.85807	26980000	27484000	26594000			1.58697	1.41963	1.2921
gi|116077776	46306000	47003000	44184000			2.2896	2.37906	2.19553	50762000	45946000	44061000			1.48119	1.51113	1.49679	0	10204000	9743300			0	0.527066	0.473389
gi|116077777	50390000	45468000	35241000			2.49153	2.30136	1.75115	195580000	168260000	171810000			5.70687	5.53396	5.83653	5110800	11354000	12090000			0.300618	0.586467	0.587406
gi|116077778	3468100	4900500	6419100			0.17148	0.248039	0.318969	2410800	1865800	1692200			0.0703452	0.0613649	0.0574855	953000	1507800	2783700			0.0560555	0.0778822	0.135249
gi|116077780	4703700	4129300	4386900			0.232574	0.209004	0.217988	4245700	3251000	3424800			0.123886	0.106923	0.116343	0	332260	307900			0	0.0171622	0.0149597
gi|116077781	246920000	255620000	219000000			12.209	12.9382	10.8823	233160000	184030000	184100000			6.80342	6.05262	6.25403	180070000	153110000	164850000			10.5917	7.90857	8.00943
gi|116077784	1592000000	1421299968	1304400000			78.7164	71.9391	64.8165	3652300032	3460400128	3007600128			106.571	113.81	102.171	2361799936	3067500032	2018499968			138.921	158.445	98.0711
gi|116077785	328790016	452520000	674600000			16.257	22.9043	33.5213	514369984	505160000	567550016			15.0089	16.6144	19.2802	770080000	689779968	700409984			45.2962	35.6291	34.0302
gi|116077789	235170	0	708070			0.011628	0	0.0351845	0	149210	0			0	0.00490742	0	78694	0	0			0.00462879	0	0
gi|116077792	15502000	16655000	12325000			0.766496	0.842992	0.612438	64732000	70915000	96960000			1.88883	2.33235	3.29381	90372000	82516000	68161000			5.31569	4.26219	3.31168
gi|116077793	18058000	15081000	15899000			0.892877	0.763324	0.790032	-	-	-			-	-	-	-	-	-			-	-	-
gi|116077796	5194500	6534400	7006600			0.256842	0.330738	0.348163	20701000	16206000	16313000			0.604038	0.533004	0.554167	7673300	7670600	10359000			0.451344	0.396209	0.503304
gi|116077798	3024800	2773500	2775800			0.149561	0.140381	0.137931	326710	0	1285200			0.00953313	0	0.0436593	0	0	394940			0	0	0.0191886
gi|158705929	145670000	150340000	233890000			7.20265	7.60945	11.6222	112140000	95206000	36903000			3.27215	3.13126	1.25363	1898200	76067000	18292000			0.111652	3.92908	0.888738
gi|172046079	175670000	210740000	186490000			8.686	10.6666	9.26681	281320000	348100000	298209984			8.20869	11.4488	10.1304	285569984	577379968	355889984			16.7972	29.8233	17.2913
gi|187611312	310660000	244570000	251810000			15.3606	12.3789	12.5126	254550000	204370000	222730000			7.42756	6.72159	7.56633	211300000	251420000	279480000			12.4287	12.9866	13.5789
gi|215274946	6241900	7869100	6446200			0.308631	0.398294	0.320316	9007200	8420400	7062400			0.262823	0.276941	0.239916	4353300	8314700	6420000			0.256061	0.429478	0.311923
gi|251764802	48797000	57648000	43857000			2.41277	2.91785	2.17928	84719000	54043000	78999000			2.47203	1.77744	2.68366	113970000	101910000	59705000			6.70372	5.26395	2.90084
gi|2911484	2419100	2237900	1120300			0.119612	0.113271	0.0556685	8289800	10643000	9339300			0.24189	0.350041	0.317264	-	-	-			-	-	-
gi|5030426	131600000	133250000	147630000			6.50696	6.74445	7.33583	197020000	168390000	160460000			5.74888	5.53823	5.45096	137120000	150260000	158880000			8.06541	7.76136	7.71937
gi|8163644	2825000	2894300	2415800			0.139682	0.146495	0.120043	1645700	2684400	2518300			0.0480202	0.0882881	0.0855488	3857900	5527400	3887800			0.226922	0.285506	0.188893
gi|116076126	-	-	-			-	-	-	10547000	10413000	10550000			0.307753	0.342477	0.358392	5866400	1825500	2806300			0.345062	0.0942924	0.136347
gi|116076153	-	-	-			-	-	-	381490	364520	0			0.0111316	0.0119888	0	0	0	52527			0	0	0.00255208
gi|116076166	-	-	-			-	-	-	1760100	1222300	1455000			0.0513583	0.0402006	0.0494276	194560	0	0			0.011444	0	0
gi|116076168	-	-	-			-	-	-	5100500	4754100	3775800			0.148828	0.156359	0.128267	147370	0	229550			0.00866831	0	0.0111529
gi|116076263	-	-	-			-	-	-	10682000	23649000	63754000			0.311692	0.7778	2.16578	25072000	21319000	27376000			1.47474	1.10119	1.33009
gi|116076298	-	-	-			-	-	-	5468100	6080900	6965700			0.159555	0.199997	0.236631	0	3764300	0			0	0.194437	0
gi|116076337	-	-	-			-	-	-	0	9540400	0			0	0.313777	0	2206700	0	0			0.129798	0	0
gi|116076463	-	-	-			-	-	-	-	-	-			-	-	-	0	0	1599900			0	0	0.077733
gi|116076475	-	-	-			-	-	-	-	-	-			-	-	-	24837000	28398000	21630000			1.46091	1.46684	1.05092
gi|116076524	-	-	-			-	-	-	812090	882850	1131400			0.0236961	0.0290363	0.0384346	0	0	214010			0	0	0.0103979
gi|116076622	-	-	-			-	-	-	10627000	11128000	12161000			0.310087	0.365992	0.41312	0	0	5339400			0	0	0.259421
gi|116076639	-	-	-			-	-	-	-	-	-			-	-	-	747689984	683480000	747939968			43.9792	35.3037	36.3395
gi|116076679	-	-	-			-	-	-	1500900	1046300	1625800			0.043795	0.0344121	0.0552298	2859200	0	1799500			0.168178	0	0.0874308
gi|116076742	-	-	-			-	-	-	10179000	12746000	25620000			0.297015	0.419207	0.870333	21420000	17450000	7581100			1.25993	0.901343	0.368336
gi|116076823	-	-	-			-	-	-	-	-	-			-	-	-	0	5098200	0			0	0.263337	0
gi|116076876	-	-	-			-	-	-	580120	0	0			0.0169274	0	0	62718	0	0			0.00368908	0	0
gi|116076903	-	-	-			-	-	-	1449900	1078900	1815000			0.0423069	0.0354843	0.0616571	842250	0	0			0.0495412	0	0
gi|116076996	-	-	-			-	-	-	6689100	5450300	3310500			0.195183	0.179257	0.112461	1265500	0	1893200			0.0744368	0	0.0919833
gi|116077033	-	-	-			-	-	-	3558300	2512800	0			0.103828	0.0826443	0	0	0	459220			0	0	0.0223117
gi|116077122	-	-	-			-	-	-	717720	683830	1001900			0.0209425	0.0224907	0.0340354	0	401840	0			0	0.0207562	0
gi|116077127	-	-	-			-	-	-	3109600	3965800	0			0.0907356	0.130432	0	1483700	0	1503200			0.0872713	0	0.0730347
gi|116077202	-	-	-			-	-	-	0	0	636730			0	0	0.0216303	0	0	58377			0	0	0.00283631
gi|116077256	-	-	-			-	-	-	-	-	-			-	-	-	0	1022200	2019100			0	0.0527996	0.0981003
gi|116077300	-	-	-			-	-	-	-	-	-			-	-	-	0	298590	0			0	0.015423	0
gi|116077309	-	-	-			-	-	-	0	1305500	0			0	0.042937	0	0	1943200	0			0	0.100372	0
gi|116077366	-	-	-			-	-	-	588530	1002800	940320			0.0171728	0.0329814	0.0319435	284590	0	524700			0.0167396	0	0.0254931
gi|116077403	-	-	-			-	-	-	733730	0	563350			0.0214096	0	0.0191375	0	0	530490			0	0	0.0257745
gi|116077412	-	-	-			-	-	-	1731600	1625600	1994600			0.0505267	0.0534649	0.0677583	0	142710	0			0	0.00737138	0
gi|116077431	-	-	-			-	-	-	305280	249390	364620			0.00890782	0.00820227	0.0123865	280020	223410	0			0.0164708	0.0115398	0
gi|116077475	-	-	-			-	-	-	51244000	46077000	26755000			1.49526	1.51544	0.90889	2930700	4893400	2727700			0.172384	0.252758	0.132528
gi|116077530	-	-	-			-	-	-	-	-	-			-	-	-	0	417600	0			0	0.0215702	0
gi|116077590	-	-	-			-	-	-	2528100	2202400	2097300			0.0737679	0.0724355	0.0712471	210540	0	0			0.012384	0	0
gi|116077628	-	-	-			-	-	-	0	2294700	4187500			0	0.0754711	0.142253	0	0	520370			0	0	0.0252828
gi|116077636	-	-	-			-	-	-	-	-	-			-	-	-	3185200	3492100	4794700			0.187354	0.180377	0.232956
gi|116077724	-	-	-			-	-	-	224930	0	253940			0.00656328	0	0.00862656	0	57081	0			0	0.0029484	0
gi|116077741	-	-	-			-	-	-	0	0	122870			0	0	0.004174	320640	0	0			0.0188601	0	0
gi|116075939	-	-	-			-	-	-	0	0	4131200			0	0	0.14034	-	-	-			-	-	-
gi|116075965	-	-	-			-	-	-	0	0	303020			0	0	0.0102938	-	-	-			-	-	-
gi|116076006	-	-	-			-	-	-	0	0	982460			0	0	0.033375	-	-	-			-	-	-
gi|116076050	-	-	-			-	-	-	1077700	0	1506100			0.0314464	0	0.0511635	-	-	-			-	-	-
gi|116076080	-	-	-			-	-	-	0	203500	0			0	0.00669298	0	-	-	-			-	-	-
gi|116076150	-	-	-			-	-	-	1434100	0	0			0.0418459	0	0	-	-	-			-	-	-
gi|116076174	-	-	-			-	-	-	467760	394500	660950			0.0136489	0.0129748	0.022453	-	-	-			-	-	-
gi|116076205	-	-	-			-	-	-	0	360460	0			0	0.0118553	0	-	-	-			-	-	-
gi|116076209	-	-	-			-	-	-	169020	0	0			0.00493187	0	0	-	-	-			-	-	-
gi|116076221	-	-	-			-	-	-	0	239230	0			0	0.00786811	0	-	-	-			-	-	-
gi|116076349	-	-	-			-	-	-	713490	0	0			0.0208191	0	0	-	-	-			-	-	-
gi|116076379	-	-	-			-	-	-	0	0	8782000			0	0	0.298332	-	-	-			-	-	-
gi|116076403	-	-	-			-	-	-	0	3722800	3150000			0	0.12244	0.107008	-	-	-			-	-	-
gi|116076526	-	-	-			-	-	-	201060	0	201380			0.00586677	0	0.00684105	-	-	-			-	-	-
gi|116076535	-	-	-			-	-	-	639370	0	0			0.0186563	0	0	-	-	-			-	-	-
gi|116076552	-	-	-			-	-	-	2924400	3287900	0			0.0853316	0.108137	0	-	-	-			-	-	-
gi|116076569	-	-	-			-	-	-	7939600	10421000	6647300			0.231671	0.34274	0.225814	-	-	-			-	-	-
gi|116076582	-	-	-			-	-	-	11948000	5249000	7714900			0.348633	0.172636	0.262082	-	-	-			-	-	-
gi|116076680	-	-	-			-	-	-	7290400	9174800	10107000			0.212728	0.301753	0.343343	-	-	-			-	-	-
gi|116076701	-	-	-			-	-	-	13843000	0	0			0.403928	0	0	-	-	-			-	-	-
gi|116076728	-	-	-			-	-	-	713330	0	589250			0.0208144	0	0.0200173	-	-	-			-	-	-
gi|116076787	-	-	-			-	-	-	2451500	1884600	1907600			0.0715328	0.0619832	0.0648028	-	-	-			-	-	-
gi|116076806	-	-	-			-	-	-	2736800	2328400	1830600			0.0798576	0.0765795	0.062187	-	-	-			-	-	-
gi|116076817	-	-	-			-	-	-	111030	0	0			0.00323977	0	0	-	-	-			-	-	-
gi|116076821	-	-	-			-	-	-	0	0	16190			0	0	0.000549988	-	-	-			-	-	-
gi|116076838	-	-	-			-	-	-	643200	380780	0			0.0187681	0.0125236	0	-	-	-			-	-	-
gi|116076839	-	-	-			-	-	-	1889600	1961900	0			0.055137	0.0645256	0	-	-	-			-	-	-
gi|116076840	-	-	-			-	-	-	0	0	159710			0	0	0.00542548	-	-	-			-	-	-
gi|116076850	-	-	-			-	-	-	0	2279700	1959600			0	0.0749778	0.0665693	-	-	-			-	-	-
gi|116076852	-	-	-			-	-	-	773400	0	0			0.0225672	0	0	-	-	-			-	-	-
gi|116076937	-	-	-			-	-	-	1854800	0	2914500			0.0541216	0	0.0990081	-	-	-			-	-	-
gi|116076946	-	-	-			-	-	-	10554000	6338300	0			0.307957	0.208462	0	-	-	-			-	-	-
gi|116076947	-	-	-			-	-	-	1325100	1623100	2806000			0.0386653	0.0533827	0.0953222	-	-	-			-	-	-
gi|116076959	-	-	-			-	-	-	6082300	7440900	4809300			0.177477	0.244726	0.163376	-	-	-			-	-	-
gi|116076995	-	-	-			-	-	-	0	552290	0			0	0.0181644	0	-	-	-			-	-	-
gi|116077002	-	-	-			-	-	-	1184400	0	0			0.0345598	0	0	-	-	-			-	-	-
gi|116077076	-	-	-			-	-	-	265240	542900	0			0.00773949	0.0178556	0	-	-	-			-	-	-
gi|116077152	-	-	-			-	-	-	936010	0	0			0.027312	0	0	-	-	-			-	-	-
gi|116077187	-	-	-			-	-	-	18133000	18571000	25100000			0.529106	0.610788	0.852668	-	-	-			-	-	-
gi|116077194	-	-	-			-	-	-	2286600	2050000	0			0.0667211	0.0674231	0	-	-	-			-	-	-
gi|116077308	-	-	-			-	-	-	3851000	6195300	0			0.112369	0.203759	0	-	-	-			-	-	-
gi|116077332	-	-	-			-	-	-	0	0	90972			0	0	0.0030904	-	-	-			-	-	-
gi|116077358	-	-	-			-	-	-	0	949010	623700			0	0.0312123	0.0211876	-	-	-			-	-	-
gi|116077364	-	-	-			-	-	-	5541100	4566400	3103100			0.161685	0.150186	0.105415	-	-	-			-	-	-
gi|116077373	-	-	-			-	-	-	6710100	6104500	5964000			0.195795	0.200773	0.202602	-	-	-			-	-	-
gi|116077389	-	-	-			-	-	-	0	0	1774200			0	0	0.0602711	-	-	-			-	-	-
gi|116077397	-	-	-			-	-	-	2789800	2679800	3467200			0.0814041	0.0881368	0.117784	-	-	-			-	-	-
gi|116077437	-	-	-			-	-	-	22912000	8205300	9291400			0.668554	0.269867	0.315637	-	-	-			-	-	-
gi|116077439	-	-	-			-	-	-	637220	0	0			0.0185936	0	0	-	-	-			-	-	-
gi|116077440	-	-	-			-	-	-	3148300	2695500	4608900			0.0918648	0.0886532	0.156568	-	-	-			-	-	-
gi|116077441	-	-	-			-	-	-	3168500	3080200	2590800			0.0924543	0.101306	0.0880117	-	-	-			-	-	-
gi|116077502	-	-	-			-	-	-	1032800	0	0			0.0301363	0	0	-	-	-			-	-	-
gi|116077582	-	-	-			-	-	-	1327900	1334100	1429800			0.038747	0.0438777	0.0485715	-	-	-			-	-	-
gi|116077595	-	-	-			-	-	-	0	0	302790			0	0	0.010286	-	-	-			-	-	-
gi|116077637	-	-	-			-	-	-	570210	288020	401140			0.0166383	0.00947278	0.0136271	-	-	-			-	-	-
gi|116077642	-	-	-			-	-	-	0	200010	210210			0	0.00657819	0.00714101	-	-	-			-	-	-
gi|116077670	-	-	-			-	-	-	1062200	755390	903600			0.0309941	0.0248443	0.0306961	-	-	-			-	-	-
gi|116077686	-	-	-			-	-	-	0	372990	0			0	0.0122674	0	-	-	-			-	-	-
gi|116077692	-	-	-			-	-	-	1249300	1021200	1025700			0.0364536	0.0335866	0.0348439	-	-	-			-	-	-
gi|116077769	-	-	-			-	-	-	583710	0	0			0.0170322	0	0	-	-	-			-	-	-
gi|116077795	-	-	-			-	-	-	0	0	714790			0	0	0.024282	-	-	-			-	-	-

## Sheet: S4_LFQ_intensities_normalized
Identifier	Median_normalised_LFQ intensity WT_BR1	Median_normalised_LFQ intensity WT_BR2	Median_normalised_LFQ intensity WT_BR3	Average_normalised_LFQ_intensities_WT	Median_normalised_LFQ intensity ΔphpP_BR1	Median_normalised_LFQ intensity ΔphpP_BR2	Median_normalised_LFQ intensity ΔphpP_BR3	Average_median_normalised_LFQ intensities_ΔphpP	Median_normalised_LFQ intensity ΔstkP_BR1	Median_normalised_LFQ intensity ΔstkP_BR2	Median_normalised_LFQ intensity ΔstkP_BR3	Average_median_normalised_LFQ intensities_ΔstkP
gi|116075886	7.07558	7.61249	6.04487	6.91098	8.82174	9.29683	8.32694	8.81517	7.65308	6.11777	2.86731	5.54605
gi|116075887	0.21072	0.203371	0.164779	0.192957	0.443203	0.572176	0.462819	0.492732	0.329039	0.351581	0.324628	0.335083
gi|116075888	2.92719	2.96816	3.4301	3.10848	1.77313	1.82292	2.28637	1.96081	3.5562	4.0189	3.9191	3.8314
gi|116075889	0.063606	0.0610012	0.0764988	0.0670353	-	-	-	-	-	-	-	-
gi|116075890	0	0.0370547	0	0.0123516	0.717429	0.312676	0.548799	0.526301	0	0	0.0289948	0.00966492
gi|116075891	5.60756	5.88753	6.09705	5.86404	7.96767	10.9676	14.2858	11.0737	21.5229	12.4158	11.7753	15.238
gi|116075892	2.43833	8.77866	7.53112	6.24937	6.57582	5.9727	10.5048	7.68444	-	-	-	-
gi|116075894	0.462716	0.404732	0.519118	0.462189	0.510519	0.488078	0.315807	0.438134	0	0	0.0165154	0.00550513
gi|116075895	0.0817424	0.0537177	0.0681756	0.0678786	-	-	-	-	0.0839186	0.0682025	0.127514	0.0932118
gi|116075897	2.21533	2.77481	2.36836	2.45283	2.09699	2.54429	2.92193	2.52107	3.40345	4.88786	1.56914	3.28682
gi|116075902	0.0123093	0	0.0143164	0.00887524	0.0420764	0.045509	0.0387947	0.0421267	0	0.0150413	0.0157618	0.0102677
gi|116075903	0.00522139	0.00610417	0.00457139	0.00529898	0.00981763	0.00728104	0.0154031	0.0108339	0	0	0.00376159	0.00125386
gi|116075904	0.837895	1.12735	0.872369	0.94587	0.441306	0.645617	0.36077	0.482565	0.366531	0.222324	0.224973	0.271276
gi|116075906	2.64926	2.67308	1.6142	2.31218	1.40183	1.53011	1.47301	1.46832	1.14458	0.54499	0.97663	0.888733
gi|116075907	2.35032	1.44698	1.0203	1.60587	1.36614	1.35899	1.33064	1.35192	2.66326	3.86436	2.2302	2.91927
gi|116075908	0.329195	0.45964	0.370305	0.38638	0.218797	0.245022	0.26663	0.243483	0.588318	0.604855	0.455179	0.549451
gi|116075910	0.417321	0.399104	0.307749	0.374725	0.292375	0.344516	0.292017	0.309636	0.479178	0.534452	0.471242	0.494957
gi|116075911	17.6098	7.70613	13.2833	12.8664	0.98223	1.12278	0.72983	0.944945	2.37321	3.25501	4.26985	3.29936
gi|116075912	0	0	0.0547194	0.0182398	-	-	-	-	-	-	-	-
gi|116075913	0.227056	0.158643	0.177753	0.187817	0.202323	0.210261	0.214118	0.208901	0.200341	0.233972	0.088524	0.174279
gi|116075914	4.95093	3.92646	3.8717	4.24969	2.04815	1.89821	1.70184	1.88273	3.50097	2.76131	2.78816	3.01682
gi|116075915	1.17219	1.26431	1.12102	1.18584	1.0503	0.824568	1	0.958291	4.77607	3.94447	3.09105	3.9372
gi|116075917	0.53539	0.749203	0.764789	0.683127	0.176829	0.244907	0.295971	0.239236	1.55861	1.47903	1.35653	1.46472
gi|116075921	3.47336	2.14056	1.53788	2.38393	3.2847	2.91314	2.61324	2.93703	13.4433	9.95196	3.76475	9.05335
gi|116075922	1.72578	1.80614	1.56908	1.70034	2.40116	2.34458	2.60988	2.45187	0.972355	0.807438	0.638471	0.806088
gi|116075923	0.255497	0.312077	0.265771	0.277781	0.222938	0.198908	0.220369	0.214072	0.565326	0.488564	0.736177	0.596689
gi|116075926	0.123835	0.0872653	0.0963701	0.10249	0.191415	0.143046	0.124996	0.153152	1.21311	2.07903	0	1.09738
gi|116075927	0	0	0.162116	0.0540386	0.0259091	0	0.0259514	0.0172868	-	-	-	-
gi|116075929	0.337546	0.305487	0.292713	0.311915	0.402352	0.30695	0.323949	0.344417	0	0.168073	0.20138	0.123151
gi|116075931	137.635	108.549	114.462	120.215	110.297	119.74	106.431	112.156	182.989	164.37	123.307	156.889
gi|116075932	1000.96	884.041	855.723	913.576	484.958	498.635	692.02	558.538	820.011	775.258	736.712	777.327
gi|116075934	27.9414	36.6989	31.2549	31.9651	78.9589	171.643	149.964	133.522	62.2258	32.4819	63.1183	52.6086
gi|116075936	3.80875	3.78828	4.29014	3.96239	2.6947	2.83217	2.15915	2.56201	4.76843	4.24499	4.77816	4.59719
gi|116075937	0	0.000751632	0	0.000250544	0	0.0120316	0.0087159	0.00691583	-	-	-	-
gi|116075938	4.3474	4.76059	3.81918	4.30906	3.45102	4.75777	6.44937	4.88605	8.36833	8.90651	6.89972	8.05819
gi|116075940	3.97043	3.47902	3.23407	3.56117	10.5728	8.76928	7.2983	8.88012	5.22228	3.93533	4.5223	4.55997
gi|116075941	0.261979	0.281075	0.335745	0.292933	0.944063	0.639303	0.844583	0.809317	1.20393	0.676705	0.618599	0.833078
gi|116075942	180.271	161.917	225.546	189.245	128.409	138.605	179.091	148.702	352.738	371.224	349.723	357.895
gi|116075944	8.43383	7.11798	8.74208	8.09796	4.58668	7.01595	6.98848	6.19704	10.4429	12.0811	11.4372	11.3204
gi|116075945	0.854063	1.30571	0.994658	1.05148	2.29121	2.4124	1.97605	2.22655	1.54014	2.27397	1.03041	1.61484
gi|116075946	1.40864	1.8065	1.89331	1.70282	2.2243	4.61931	2.60998	3.1512	1.69702	2.29401	1.56428	1.85177
gi|116075947	0	0	0.305548	0.101849	0	0	0.0714781	0.023826	-	-	-	-
gi|116075949	0.0505773	0.0363866	0.0719123	0.0529587	0.0259873	0.0290419	0.026944	0.0273244	0	0.0167505	0.0162657	0.0110054
gi|116075951	0.274855	0.219775	0.279505	0.258045	0.100969	0.20127	0.13588	0.146039	0	0.0449793	0.0656642	0.0368812
gi|116075952	24.4847	30.6514	19.8966	25.0109	14.669	14.5206	14.9737	14.7211	20.0829	12.6198	8.22272	13.6418
gi|116075954	0	0.0439247	0	0.0146416	0.0607744	0.0685414	0	0.0431053	0.14028	0.144127	0	0.0948023
gi|116075955	0.45342	0.570431	0.598574	0.540808	0.152	0.179053	0.216272	0.182442	0.519928	0.549329	0.509329	0.526195
gi|116075958	66.8892	68.2745	65.3681	66.8439	47.2674	67.5941	53.9491	56.2702	67.049	48.702	67.6854	61.1454
gi|116075959	1.54239	1.92033	1.8956	1.78611	3.38595	3.62506	4.31668	3.7759	2.99853	2.61937	2.94884	2.85558
gi|116075960	2.97674	2.56046	2.98169	2.83963	2.93222	3.11258	7.61728	4.55403	2.73313	2.86823	1.97542	2.52559
gi|116075961	108.27	87.574	87.1624	94.3354	45.0702	62.1246	49.3664	52.1871	205.347	170.155	164.906	180.136
gi|116075962	0	0.0131184	0	0.0043728	-	-	-	-	-	-	-	-
gi|116075963	1.01476	1.11586	1.38011	1.17024	0.215217	0.290311	0.375955	0.293828	0.0697724	0.477949	0.438461	0.328728
gi|116075964	0.501075	0.350084	0.437308	0.429489	0.66797	0.791975	0.690152	0.716699	2.25822	1.97567	0.931979	1.72196
gi|116075966	2.54478	2.04697	1.40381	1.99852	2.49678	2.48301	0.990488	1.99009	3.30381	3.13858	2.62176	3.02138
gi|116075969	1.41783	1.27281	1.60377	1.43147	0.409063	0.639895	0.562048	0.537002	0.927298	0.584504	0.865659	0.792487
gi|116075971	0.316354	0.274677	0.383244	0.324759	0.079878	0.11899	0.0940789	0.0976491	0.928769	1.02107	1.06277	1.00421
gi|116075972	0.108205	0.120783	0.240249	0.156412	0.00864959	0.0152107	0.0147525	0.0128709	0.0423222	0.0376389	0.0233782	0.0344465
gi|116075974	1.16769	1.15984	1.03888	1.12214	0.145131	0.221056	0.191429	0.185872	0.156361	0.286245	0.231022	0.224543
gi|116075975	0.523276	0.457514	0.589928	0.523573	0.763911	1.24575	1.26647	1.09204	1.76948	1.28889	1.08085	1.37974
gi|116075978	50.2658	53.8847	69.3433	57.8313	42.765	51.0705	61.7692	51.8683	53.938	46.4721	42.0601	47.4901
gi|116075979	4.22458	4.54072	3.18845	3.98458	2.99349	4.17168	5.01682	4.06066	5.81095	8.9907	3.9174	6.23969
gi|116075981	0.316878	0.30696	0.332346	0.318728	0.532462	1.07038	0.720352	0.774399	0.378366	0.342376	0.26409	0.328277
gi|116075982	0.0590373	0.0629296	0.051887	0.0579513	0.131379	0.106644	0.0952984	0.111107	0.172737	0.12625	0.116199	0.138395
gi|116075983	0.514673	0.463299	0.431852	0.469941	0.65551	0.653807	0.53854	0.615952	0.399241	0.411059	0.661403	0.490568
gi|116075984	8.51541	4.75335	8.44891	7.23922	6.17373	6.07597	7.63359	6.62777	12.4757	8.0124	11.356	10.6147
gi|116075985	0	0.040616	0	0.0135387	-	-	-	-	-	-	-	-
gi|116075986	5.42659	4.77213	5.06249	5.08707	4.36521	4.28943	4.15022	4.26828	4.53526	4.57097	5.30998	4.8054
gi|116075987	4.46953	4.50726	3.38254	4.11978	2.35963	2.88186	2.88936	2.71028	4.65649	2.54597	4.08323	3.7619
gi|116075988	6.013	5.97611	8.48419	6.82443	23.4907	25.4511	34.8371	27.9263	12.144	7.36467	11.6228	10.3771
gi|116075990	0.147509	0.16008	0.0900693	0.132553	0.314873	0.304328	0.493155	0.370785	0.220434	0.217789	0.166296	0.201506
gi|116075992	0.959727	0.95227	0.635444	0.849147	1.81664	2.5534	2.37793	2.24932	2.64384	1.48394	1.05495	1.72758
gi|116075994	0.22409	0.275406	0.201675	0.233723	0.275863	0.252439	0.499473	0.342592	0.748956	0.267268	0.436231	0.484151
gi|116075996	13.99	19.1375	21.3292	18.1522	15.6091	25.134	34.1849	24.976	12.6316	23.7645	21.6388	19.345
gi|116075997	0.100482	0	0	0.033494	-	-	-	-	-	-	-	-
gi|116076002	6.86741	7.33968	7.80094	7.33601	4.73491	5.82865	5.72817	5.43057	8.56597	10.454	7.50559	8.84186
gi|116076003	0.036525	0.0298841	0.0599568	0.042122	0.681334	0.78076	0.745558	0.735884	0.219417	0.246792	0.233908	0.233372
gi|116076007	0.0553388	0.0723895	0	0.0425761	0.0949812	0.101335	0.0872439	0.0945201	0.0953767	0.103554	0.0952969	0.0980758
gi|116076009	1.22619	1.49097	1.17528	1.29748	2.66893	2.13942	3.09692	2.63509	5.22434	5.53874	4.58002	5.11437
gi|116076010	343.855	428.086	467.49	413.144	278.795	339.78	313.626	310.734	747.309	925.775	746.915	806.666
gi|116076012	0.0746125	0.0630207	0.0802504	0.0726279	0.678358	0.139474	0.402724	0.406852	3.20134	2.69447	2.21611	2.70398
gi|116076014	5.45576	5.65572	11.2127	7.44139	1.48467	1.73041	2.206	1.80702	0	1.31627	1.56438	0.960216
gi|116076015	0.531632	0.551045	0.527715	0.536798	0.359867	0.327591	0.23994	0.309132	0.763132	0.620093	0.755223	0.712816
gi|116076016	0.936043	1.1855	1.20008	1.10721	0.892971	0.904095	1.0762	0.957754	3.33104	2.8093	2.48678	2.87571
gi|116076017	51.3437	54.1935	74.7497	60.0956	18.8903	20.6877	29.8808	23.1529	76.4602	99.9742	73.5254	83.3199
gi|116076018	4.54889	4.46156	4.08681	4.36575	0.259491	0.210248	0.175874	0.215204	0.695194	0.788636	0.94913	0.810987
gi|116076020	0.933966	0.9918	0.866208	0.930658	1.3629	1.21566	1.79142	1.45666	0.962826	0.784659	0.560344	0.769276
gi|116076022	1.83095	2.59017	2.16915	2.19676	2.15401	1.93787	1.56011	1.884	0.569743	0.679184	0.461044	0.56999
gi|116076023	229.533	214.395	150.13	198.02	84.9319	79.8586	75.5818	80.1241	265.69	276.958	237.416	260.021
gi|116076025	0.015365	0	0	0.00512168	-	-	-	-	-	-	-	-
gi|116076028	1.05422	0.928228	1.22224	1.06823	0.292463	0.247946	0.334304	0.291571	0.272437	0.29939	0.333947	0.301925
gi|116076029	93.2681	108.554	104.102	101.975	62.3968	75.5961	117.648	85.2136	62.6198	78.9205	72.0047	71.1817
gi|116076031	0.0214438	0.0251202	0	0.0155213	0.143839	0.0960401	0.063641	0.101173	0.0627493	0.0723554	0.0525508	0.0625518
gi|116076032	0.315528	0.325743	0.280032	0.307101	0.201786	0.176629	0.228743	0.202386	0	0.0506446	0.0444359	0.0316935
gi|116076033	3.31613	3.92393	2.33253	3.19086	1.03043	0.967111	0.747325	0.914956	5.63349	4.29793	4.52298	4.81814
gi|116076035	4.30067	3.94615	2.43648	3.5611	6.43547	5.70432	4.10402	5.4146	9.57767	7.60331	9.28238	8.82112
gi|116076036	0.145314	0.144784	0.0999677	0.130022	0.318958	0.253356	0.210555	0.260956	0	0.0603409	0.0865125	0.0489511
gi|116076037	0.184103	0.139303	0.172844	0.165417	0.245257	0.314317	0.337908	0.299161	0.102076	0.112691	0.163638	0.126135
gi|116076038	0.624985	0.83702	0.785659	0.749221	1.71693	2.60335	1.5505	1.95693	0.345738	1.13662	0.539501	0.673954
gi|116076039	16.2204	10.0081	18.4551	14.8945	14.4519	18.2181	16.5628	16.4109	43.1863	33.6441	38.2402	38.3569
gi|116076040	28.637	29.7414	31.7658	30.0481	23.6433	29.1094	25.1452	25.966	37.216	40.3249	31.6247	36.3886
gi|116076041	1.43949	1.58577	1.19531	1.40686	4.05036	4.09867	4.41655	4.18853	0.518664	0.59969	0.601448	0.573267
gi|116076042	0.0335553	0.0694893	0.148635	0.0838931	0.03004	0.0222967	0.0353942	0.0292436	0.00959944	0.012812	0.0109868	0.0111327
gi|116076043	56.4859	48.8581	42.7012	49.3484	67.1413	89.1202	134.453	96.9049	125.275	34.5837	61.855	73.9046
gi|116076046	0.0788994	0.0783064	0.0940595	0.0837551	0.105903	0.0719191	0.0759079	0.0845766	0	0.0374861	0.0430969	0.026861
gi|116076048	9.18984	6.87807	10.8505	8.97279	3.43264	4.32922	4.63227	4.13138	3.36339	2.06617	2.1356	2.52172
gi|116076049	0.375658	0.969884	0.485031	0.610191	0.315515	0.386647	0.388321	0.363494	0.290548	0.167257	0.188354	0.215386
gi|116076052	0.0608124	0.0615225	0.0903923	0.0709091	0.101637	0.102552	0.09485	0.0996797	0.0825069	0.0764514	0	0.0529861
gi|116076054	0.539	0.414481	0.627991	0.527157	1.48983	1.72363	1.35275	1.52207	0.689959	0.654959	0.579438	0.641452
gi|116076055	0.0311429	0.0384137	0.0290929	0.0328832	0.146112	0.146788	0.128726	0.140542	0	0.0337474	0.0408245	0.0248573
gi|116076057	8.68946	10.9121	13.4751	11.0256	7.98284	6.04045	5.02565	6.34965	5.54573	4.22541	3.01224	4.26113
gi|116076058	1.666	1.39662	1.30363	1.45542	0.749701	0.734649	0.551585	0.678645	0.861655	0.896178	1.02424	0.927359
gi|116076059	12.7207	10.3411	7.96492	10.3423	7.10601	6.98471	3.60363	5.89811	2.7576	3.65656	3.65373	3.35596
gi|116076060	1.48661	1.44349	1.63045	1.52018	0.436637	0.60444	0.723919	0.588332	3.89124	3.98306	3.37042	3.74824
gi|116076062	0.142945	0.147725	0.123779	0.13815	0.0848239	0.0830291	0.0719876	0.0799469	0.167984	0.0905114	0.0859878	0.114828
gi|116076064	0.386121	0.607886	0.253681	0.415896	0.119839	0.0817333	0.104623	0.102065	0.116352	0.157293	0.0742348	0.11596
gi|116076067	0	0	0.0806927	0.0268976	0.104205	0.0921197	0.141896	0.11274	0.193753	0.147557	0.104771	0.148694
gi|116076070	3.1808	3.66042	2.59947	3.1469	-	-	-	-	0	0	0.20823	0.0694102
gi|116076071	155.47	159.538	266.327	193.778	142.721	146.864	125.923	138.503	473.237	531.25	438.709	481.065
gi|116076072	3.58555	3.66574	3.34448	3.53192	2.20446	1.56649	1.75425	1.84173	0.110705	0.958161	0.829463	0.632776
gi|116076073	31.2527	44.0806	29.7563	35.0298	0.13561	0.165539	0.153783	0.151644	0.148291	0.1003	0.103032	0.117208
gi|116076081	0.396475	0.925748	0.373634	0.565286	-	-	-	-	-	-	-	-
gi|116076082	1.80301	1.63451	1.478	1.63851	2.07245	3.01621	1.87173	2.32013	2.07135	1.81214	1.65062	1.8447
gi|116076083	0.567084	0.602672	0.67316	0.614306	2.51493	1.98257	1.94585	2.14778	1.0687	1.50398	1.41828	1.33032
gi|116076086	17.7127	15.76	16.9187	16.7971	7.61168	9.05969	4.95805	7.20981	18.8318	22.2092	19.4369	20.1593
gi|116076088	0.0380756	0.029797	0.0380829	0.0353185	0.0858744	0.0745864	0.080229	0.0802299	0	0.0169892	0.0173632	0.0114508
gi|116076090	0.00905288	0	0	0.00301763	-	-	-	-	0.0524816	0.0456632	0.0884705	0.0622051
gi|116076091	0.95587	0.995748	1.69137	1.21433	5.04654	7.22184	5.37827	5.88221	8.17481	11.0331	7.71062	8.97283
gi|116076092	0.215165	0.498046	0.250575	0.321262	0.207948	0.297691	0.280409	0.262016	0.0533369	0.163838	0.171558	0.129577
gi|116076094	1.00462	0.96872	0.949788	0.974377	0.365995	0.356882	0.393382	0.372086	0	0.158306	0.132363	0.0968897
gi|116076095	0.276823	0.242724	0.204487	0.241345	0.0552916	0.0522973	0.125961	0.0778498	0	0.380217	0.244408	0.208208
gi|116076099	0.360202	0.54816	0.667445	0.525269	0.487292	0.533333	0.534226	0.518284	0.750779	0.577169	0.644641	0.65753
gi|116076100	0.598729	0.60819	0.784367	0.663762	0.593563	0.681237	0.523185	0.599328	1.54397	1.61617	0.705422	1.28852
gi|116076101	54.5032	53.9606	49.9193	52.7944	72.0668	58.9739	51.3232	60.7879	94.865	78.5021	71.4751	81.6141
gi|116076102	8.91592	9.45538	9.58533	9.31888	4.91465	4.77093	5.95067	5.21208	9.57355	13.0067	9.62832	10.7362
gi|116076103	1.69982	1.80124	1.0123	1.50445	1.21315	1.10212	1.17189	1.16239	2.27645	1.64184	1.42634	1.78155
gi|116076106	0.462795	0.527155	0.58799	0.52598	0.116545	0.0935504	0.121395	0.110497	0.193153	0.153466	0.0865708	0.144397
gi|116076108	14.2619	14.4232	13.6446	14.1099	14.6748	17.8546	15.5209	16.0168	12.1011	7.07903	7.00272	8.7276
gi|116076109	0.589829	0.715443	0.787746	0.697673	1.30892	0.64121	1.54724	1.16579	0.383854	1.01379	0.723496	0.707047
gi|116076110	1.66051	0.934403	1.35139	1.31543	3.38624	3.24575	4.44339	3.69179	1.28657	1.37283	1.4295	1.36297
gi|116076113	0	0.0744496	0.0806281	0.0516926	-	-	-	-	0	0	0.0271864	0.00906213
gi|116076116	2.0449	1.29832	1.73659	1.69327	1.05888	1.34011	3.83259	2.07719	4.05947	2.69044	2.27796	3.00929
gi|116076117	0.473515	0.553424	0.709931	0.578957	4.13527	4.29304	3.75242	4.06025	0.439357	0.610176	0.467846	0.505793
gi|116076118	2.00396	1.94367	2.61438	2.18733	0.600362	0.346654	0.621701	0.522905	0.866184	0.877996	0.70207	0.815417
gi|116076119	0.390284	0.608645	0.574524	0.524484	0.291191	0.407729	0.534803	0.411241	1.31216	0	1.06846	0.793539
gi|116076121	0.172845	0.176307	0.250883	0.200012	0.34837	0.371321	0.34263	0.354107	0.355632	0.392479	0.278996	0.342369
gi|116076122	20.5993	22.1268	19.6994	20.8085	32.2955	41.2465	53.9253	42.4891	17.8548	11.9628	11.3658	13.7278
gi|116076123	203.545	233.573	136.456	191.191	188.287	302.289	318.079	269.552	433.369	480.63	349.495	421.164
gi|116076125	1.43336	0.632535	1.16336	1.07642	2.09101	2.09801	1.85603	2.01502	1.88542	2.397	1.70324	1.99522
gi|116076127	0.49707	0.839854	0.808269	0.715064	0.250556	0.379609	0.265744	0.298636	0.225793	0.233662	0.254125	0.23786
gi|116076129	1.74081	0.933138	1.21623	1.29673	1.08941	1.93557	2.89904	1.97467	7.51132	5.81767	4.71956	6.01618
gi|116076132	0.0440194	0	0	0.0146731	0.0265965	0.0166282	0.148493	0.063906	0	0	0.0288738	0.00962459
gi|116076133	0.338515	0.35225	0.365987	0.352251	0.117726	0.171975	0.173656	0.154452	0.583313	0.68657	0.381984	0.550622
gi|116076136	0.0932878	0.0804778	0.123327	0.099031	0.0940445	0.0965433	0.0836023	0.0913967	0.107594	0.143827	0.0456579	0.0990263
gi|116076137	0.0200994	0	0	0.00669979	0.0345861	0.0470317	0.034922	0.0388466	-	-	-	-
gi|116076138	3.35919	2.54204	4.4021	3.43444	2.74071	2.11301	1.83548	2.22973	0.488277	0.854649	1.21208	0.851668
gi|116076141	0.150881	0.120565	0.169316	0.146921	0.0601237	0.055379	0.075969	0.0638239	0	0.0236488	0.0369206	0.0201898
gi|116076142	0.240995	0.231371	0	0.157455	0.0324181	0.0385792	0	0.0236658	-	-	-	-
gi|116076143	3.73527	4.22341	4.18778	4.04882	7.18567	7.15507	7.27452	7.20509	5.09082	6.65754	5.03061	5.59299
gi|116076147	0.06592	0	0	0.0219733	0.108313	0.0982799	0.0694908	0.0920279	0	0.0165511	0.0210543	0.0125352
gi|116076148	4.31813	4.57494	9.49788	6.13031	3.17411	6.03947	5.90685	5.04014	11.7299	8.81302	9.26732	9.93675
gi|116076149	1.30911	1.11768	1.20276	1.20985	3.58933	3.74017	2.76217	3.36389	2.47897	2.58068	2.90463	2.65476
gi|116076154	6.26221	4.96239	5.06149	5.4287	5.38035	4.79132	4.27965	4.81711	3.09952	2.69788	1.90778	2.5684
gi|116076155	2.63433	2.24422	1.61579	2.16478	0.426921	0.507482	0.992764	0.642389	2.58226	2.26059	2.14518	2.32934
gi|116076156	0.270607	0.250797	0.321638	0.281014	0.240524	0.181543	0	0.140689	0.418093	0.171193	0.326271	0.305186
gi|116076157	8.12727	8.11459	11.2375	9.1598	8.37063	8.83605	9.11982	8.7755	8.39068	7.99122	6.87397	7.75196
gi|116076160	0.687829	0.839449	0.920768	0.816016	1.39156	1.81934	1.78418	1.66503	2.25146	1.96767	1.67831	1.96581
gi|116076161	3.29318	4.76444	5.03416	4.36393	8.48064	5.76616	6.81184	7.01954	2.38351	3.4875	2.98052	2.95051
gi|116076162	3.59178	2.57833	3.44804	3.20605	4.35266	5.19618	5.86099	5.13661	17.389	9.51653	14.261	13.7222
gi|116076169	15.5875	12.7357	10.3183	12.8805	6.52067	13.3393	12.9426	10.9342	22.9598	18.3864	23.0556	21.4673
gi|116076170	0.127608	0.118576	0	0.0820611	0.0670013	0.0678013	0.50586	0.213554	0.221905	0.130677	0.147614	0.166732
gi|116076172	0.166531	0.139561	0.13809	0.148061	0	0	0.0337949	0.011265	0.0975707	0	0	0.0325236
gi|116076173	0.0140201	0.0143554	0.0231727	0.0171828	0.177643	0.190525	0.147539	0.171902	0.0578231	0.0260232	0.0340676	0.0393046
gi|116076175	6.69089	8.0908	6.77731	7.18634	12.2958	15.8372	14.5419	14.225	8.54714	7.71952	10.6773	8.98132
gi|116076176	0.0491419	0.0391552	0.0362334	0.0415102	0.24582	0.220858	0.30977	0.258816	0.864714	0.439876	0.393353	0.565981
gi|116076178	106.88	106.408	61.0698	91.4527	94.6018	86.5022	92.1969	91.1003	86.7949	75.2118	73.8072	78.6046
gi|116076179	1.08725	0.675609	1.04013	0.934327	1.26947	0.800954	1.62608	1.23217	2.53979	1.7687	1.49446	1.93432
gi|116076180	21.2801	22.4052	24.2143	22.6332	34.3001	33.3761	37.1335	34.9366	28.813	24.5532	26.2457	26.5373
gi|116076183	0.960073	1.14167	0.892743	0.998162	0.366753	0.383062	0.2897	0.346505	0.0707253	0.23422	0.310393	0.205113
gi|116076185	11.0905	11.2143	12.2309	11.5119	6.54723	7.86778	7.69236	7.36912	3.68137	2.7782	2.35599	2.93852
gi|116076186	70.3404	61.9224	61.7158	64.6595	42.552	70.6726	97.8055	70.3434	128.916	108.208	92.9404	110.021
gi|116076187	6.96878	8.20772	7.62354	7.60001	7.10601	8.62917	10.9675	8.90089	7.80013	7.63275	5.63016	7.02101
gi|116076188	0.11941	0.0959204	0.0922706	0.102534	0.151665	0.177313	0.139036	0.156005	0	0	0.026152	0.00871733
gi|116076189	7.17249	6.26512	5.70201	6.37987	6.48712	6.36178	6.19934	6.34941	5.00871	3.43223	3.13376	3.85823
gi|116076192	1.63	1.52994	1.55765	1.57253	2.54408	2.50354	1.71509	2.25423	2.13623	1.7155	3.4846	2.44544
gi|116076194	3.27899	3.23349	2.85547	3.12265	7.70768	6.14932	9.84509	7.9007	11.1452	7.21746	5.37703	7.91324
gi|116076195	0.0594477	0.0761857	0.0685533	0.0680622	-	-	-	-	0.0586665	0.0564876	0.0694199	0.0615247
gi|116076197	31.3239	34.8783	34.8068	33.6697	24.4338	25.6645	43.7477	31.282	49.6488	29	34.244	37.6309
gi|116076198	4.09108	4.64205	4.80459	4.51257	4.3442	3.88686	4.75388	4.32831	2.6312	1.80894	2.2182	2.21944
gi|116076200	6.67161	6.66599	7.47745	6.93835	10.0575	16.1039	17.017	14.3928	10.1153	9.94525	7.78447	9.28167
gi|116076202	7.2432	6.18464	7.86504	7.09763	6.67299	9.72768	7.61151	8.00406	2.45703	4.19783	5.47129	4.04205
gi|116076203	14.7519	17.7583	17.4504	16.6535	15.5335	29.8224	14.4047	19.9202	61.4023	34.3957	39.3008	45.0329
gi|116076207	0.193206	0.193972	0.140098	0.175759	0.375536	0.260033	0.231409	0.288993	0.277719	0.271116	0.316889	0.288574
gi|116076211	4.50849	5.10199	6.08114	5.23054	2.49041	2.56576	1.88433	2.3135	4.24681	2.67598	2.13162	3.01814
gi|116076212	0.381003	0.231817	0.860891	0.491237	0.168037	0.199388	0.26289	0.210105	0.0133222	0.024968	0.0337737	0.0240213
gi|116076214	246.231	268.846	225.551	246.876	101.155	107.236	158.209	122.2	178.048	156.513	111.67	148.744
gi|116076215	0.666716	0.650453	0.768466	0.695212	1.26305	1.17974	1.17903	1.20727	2.33192	2.66173	1.71057	2.23474
gi|116076216	4.34928	3.173	4.5384	4.02023	9.32421	6.59069	7.16275	7.69255	3.4365	4.47598	3.72738	3.87996
gi|116076217	1.41655	0.835046	0.556784	0.936126	5.44017	5.92501	17.5894	9.65154	19.1248	7.04339	5.99504	10.7211
gi|116076219	0	0	0.38802	0.12934	-	-	-	-	-	-	-	-
gi|116076220	10.7929	13.2753	15.7495	13.2725	8.81649	11.9868	14.0622	11.6219	17.7666	36.6772	13.7722	22.7387
gi|116076222	1.34817	1.43822	1.31069	1.36569	0.75863	0.646604	0.589089	0.664774	0.612317	0.551446	0.639199	0.600988
gi|116076223	0.0156162	0	0	0.0052054	0	0	0.00791045	0.00263682	0.0400418	0	0	0.0133473
gi|116076225	0.035364	0.0269221	0	0.020762	0.170471	0.0644433	0	0.0783047	-	-	-	-
gi|116076226	7.38461	8.06701	6.32811	7.25991	6.41329	7.24782	9.74997	7.8037	5.60943	3.94267	4.98737	4.84649
gi|116076227	2.962	3.07395	3.37633	3.13743	2.60471	2.12511	2.46537	2.3984	2.81772	3.87805	2.63322	3.10966
gi|116076228	4.60204	5.58739	7.57832	5.92258	7.19063	10.3289	8.25831	8.59261	14.8685	12.1002	12.6032	13.1907
gi|116076229	0.154545	0.174642	0.147452	0.15888	0.357358	0.515902	0.411353	0.428204	0.115099	0.145945	0.068934	0.109993
gi|116076232	0.0643526	0.0724351	0	0.0455959	-	-	-	-	0	0.106772	0	0.0355906
gi|116076234	9.70902	9.35871	4.83734	7.96835	11.6463	15.8099	17.7324	15.0629	9.68708	8.63171	7.91371	8.74417
gi|116076237	20.6715	23.4322	21.373	21.8255	1.76248	2.22384	2.40959	2.13197	15.1773	11.0155	14.1269	13.4399
gi|116076244	0.671117	0.818292	0.945266	0.811558	0.441802	0.634271	0.52947	0.535181	0.945827	1.28827	1.16801	1.13404
gi|116076245	0.33898	0.365298	0.346061	0.350113	0.135009	0.160483	0.101868	0.132454	1.36957	1.3655	1.75347	1.49618
gi|116076247	9.07612	12.4766	12.4873	11.3467	1.22938	1.22335	1.77372	1.40882	12.7975	8.60227	7.72908	9.70961
gi|116076249	0	0	0.0395528	0.0131843	0.119921	0.141052	0.162836	0.14127	-	-	-	-
gi|116076250	27.6585	25.4452	24.2779	25.7939	14.7314	11.2837	12.6236	12.8795	28.8907	26.6245	23.2086	26.2413
gi|116076256	8.53668	6.32434	6.34649	7.06917	2.22194	2.73254	3.70452	2.88633	3.97488	4.53218	3.50996	4.00567
gi|116076257	2.52427	2.07724	2.72673	2.44274	3.83502	3.81023	2.75453	3.46659	2.14029	4.86281	3.27398	3.42569
gi|116076259	0.0128211	0.0126041	0.0117991	0.0124081	0.0433778	0.0376057	0.0333295	0.0381043	0.0275413	0.0413249	0.0196035	0.0294899
gi|116076260	18.174	27.1585	24.0359	23.1228	31.7207	48.5249	44.0262	41.4239	39.3283	18.9039	21.3007	26.511
gi|116076261	0.360053	0.245169	0.245656	0.283626	0.443524	0.436376	0.290478	0.390126	0.733192	0.622469	0.556214	0.637292
gi|116076264	0.384034	0.298811	0.277537	0.320127	2.16098	2.10284	3.61756	2.62713	2.02176	2.08838	1.01147	1.7072
gi|116076265	1.64578	1.63917	1.55765	1.6142	0.888856	1.14692	1.13035	1.05537	0.318293	0.451038	0.484525	0.417952
gi|116076268	0.0466751	0.03786	0.0675296	0.0506882	0.0722214	0.0970827	0.0790128	0.0827723	0	0.0509174	0	0.0169725
gi|116076269	6.77495	5.58587	7.30403	6.55495	0.959353	0.91656	0.894996	0.923636	1.16946	1.72066	1.36469	1.41827
gi|116076270	1.48938	1.41692	1.54861	1.48497	0.601937	0.651603	0.663179	0.638907	0.668431	0.726808	0.529735	0.641658
gi|116076272	13.1677	16.0045	13.0274	14.0665	21.257	28.3039	24.5439	24.7016	27.6513	40.5517	22.0873	30.0967
gi|116076276	0.453341	0.491228	0.49317	0.479247	0.890228	1.11439	0.908822	0.971146	0.277348	0.367459	0.375202	0.340003
gi|116076277	0.683874	0.853368	1.03451	0.857251	-	-	-	-	-	-	-	-
gi|116076280	124.572	136.741	179.98	147.098	94.2079	127.074	162.795	128.026	209.541	169.793	141.026	173.453
gi|116076281	61.8211	58.6931	49.6156	56.7099	23.6985	36.3723	33.7725	31.2811	117.264	90.0155	96.9537	101.411
gi|116076282	0.349126	0.29633	0.375855	0.340437	0.0825129	0.0706265	0.0919693	0.0817029	0.853244	0.747262	0.623166	0.741224
gi|116076284	1.54145	1.45822	1.10502	1.36823	2.73715	2.66117	4.37103	3.25645	1.36398	1.11632	0.655136	1.04515
gi|116076287	3.03424	3.98375	3.13593	3.38464	1.87803	1.80155	1.93026	1.86994	1.47591	1.76162	1.37824	1.53859
gi|116076288	7.51316	7.06787	3.66051	6.08052	4.9911	4.20753	5.81241	5.00368	11.5981	10.3709	10.5757	10.8483
gi|116076290	0.757992	0.887027	0.536709	0.727243	0.833562	0.597139	0.974896	0.801865	0.85842	0.763688	0.771742	0.79795
gi|116076291	0	0.15061	3.13046	1.09369	0.142316	0.13949	0.104518	0.128775	-	-	-	-
gi|116076292	98.3115	111.024	142.771	117.369	47.53	53.9155	40.1332	47.1929	153.056	218.993	118.764	163.604
gi|116076293	0.152577	0.0866933	0.249711	0.162994	-	-	-	-	0	0	0.234171	0.0780569
gi|116076300	40.1271	36.252	44.8066	40.3952	30.288	28.9396	35.6116	31.6131	34.3562	31.6906	31.0611	32.3693
gi|116076301	0.982719	0.999393	1.15908	1.04707	0.544834	0.342937	0.461834	0.449868	0	0.289979	0.269041	0.18634
gi|116076303	0.068511	0.0688971	0	0.0458027	0.142383	0.200582	0.233601	0.192188	0	0.0312619	0.0249524	0.0187381
gi|116076304	0.16439	0.181333	0.162071	0.169265	0.153097	0.145591	0.113931	0.13754	0.240974	0.313233	0.342634	0.298947
gi|116076305	41.4117	35.3318	40.2455	38.9963	25.2032	34.4483	38.8457	32.8324	71.2017	77.8874	67.7485	72.2792
gi|116076306	0	0.0316096	0.0225919	0.0180671	0.0745236	0.0655649	0.0515881	0.0638922	0.180319	0.0971746	0.164032	0.147175
gi|116076307	0.200668	0.187093	0.265805	0.217855	0.0658137	0.129952	0.142868	0.112878	0	0.209845	0	0.0699483
gi|116076309	0.245074	0.229731	0.250466	0.241757	0.183318	0.122796	0.302748	0.202954	0.686665	0.335956	0.230619	0.417747
gi|116076310	6.00114	6.39318	6.52041	6.30491	3.53448	3.32412	3.69603	3.51821	5.8566	5.04943	4.27165	5.05922
gi|116076311	0.104462	0.339024	0.0501926	0.16456	-	-	-	-	0.0272784	0.051345	0.0315173	0.0367136
gi|116076312	0.126718	0.0969985	0.137176	0.120297	0.159158	0.204016	0.196025	0.1864	0.0957238	0.119649	0.141225	0.118866
gi|116076313	1.16131	1.24199	1.19367	1.19899	0.576435	0.565269	0.933213	0.691639	2.83266	2.38022	1.93237	2.38175
gi|116076314	0.0467305	0	0.0515938	0.0327748	0	0	0.0626932	0.0208977	0.208023	0.158559	0.153552	0.173378
gi|116076315	16.2417	16.6468	15.0463	15.9783	6.92568	7.51554	6.15858	6.8666	28.3342	22.3244	19.8688	23.5091
gi|116076316	5.35637	5.41833	6.19345	5.65605	1.50713	1.97918	1.06747	1.51793	6.20905	9.89256	8.13721	8.07961
gi|116076319	3.61937	2.99322	3.51755	3.37671	1.09154	1.5112	1.35673	1.31982	2.44515	2.56214	2.25352	2.42027
gi|116076320	0.0976835	0.116116	0.116887	0.110229	0.0351901	0.0519158	0.0714883	0.0528647	0	0.00990651	0.0109916	0.00696605
gi|116076321	1.07152	1.13372	1.07913	1.09479	1.07639	1.42546	0.775419	1.09242	0.850479	0	1.49077	0.780416
gi|116076323	0.123786	0.101579	0.0674302	0.0975983	0.143241	0.1521	0.146166	0.147169	-	-	-	-
gi|116076324	0.349423	0.341535	0.2643	0.318419	0.174637	0.18837	0.253062	0.205357	0.713899	0.397164	0.320265	0.47711
gi|116076325	8.54805	7.82609	6.80116	7.7251	5.57177	5.32116	4.98692	5.29328	1.72019	1.87355	2.02551	1.87308
gi|116076326	0.482242	0.417376	0	0.299873	0.395845	0.429864	0.26165	0.362453	0.52314	0.119737	0.682538	0.441805
gi|116076327	0.0939405	0.122635	0.138548	0.118374	0.719763	0.679757	0.726365	0.708628	0.34285	0.246131	0.176752	0.255244
gi|116076328	64.2933	71.7619	80.4492	72.1681	63.135	80.9143	113.517	85.8554	44.0874	32.6204	35.5495	37.4191
gi|116076329	2.30478	3.0038	2.52056	2.60971	0.181194	0.137543	0.152842	0.157193	0	0.0603099	0.0490866	0.0364655
gi|116076330	12.8592	15.3991	19.2199	15.826	13.4145	15.306	17.1617	15.2941	4.62067	3.29143	4.95676	4.28962
gi|116076331	2.28055	2.32191	3.59885	2.73377	3.40317	3.31985	4.06699	3.59667	8.10541	7.74019	8.73239	8.19266
gi|116076332	5.90027	5.26801	5.14547	5.43792	5.49065	5.24256	6.13276	5.62199	6.12552	4.65713	4.54329	5.10865
gi|116076333	0.328038	0.384669	0.345082	0.352596	1.66902	1.80918	1.636	1.70473	0	0.274385	0.290224	0.188203
gi|116076335	2.16139	3.05289	3.67805	2.96411	1.63447	1.47038	1.50735	1.5374	1.99624	1.02867	1.13531	1.38674
gi|116076338	1.28028	1.32343	1.20987	1.27119	2.14175	2.14968	1.97242	2.08795	0.917652	1.10351	0.969245	0.996803
gi|116076340	13.0124	11.9775	18.1252	14.3717	8.90228	9.46654	16.9185	11.7624	29.9353	17.048	18.2922	21.7585
gi|116076341	0.176257	0.206975	0.416671	0.266634	0.44793	0.519059	0.334603	0.433864	0.470772	0.643595	0.56185	0.558739
gi|116076343	4.13632	4.1437	5.97033	4.75012	1.90598	2.13327	2.00965	2.0163	0.126693	1.97593	1.91264	1.33842
gi|116076344	0.0615491	0.0633295	0.116222	0.0803667	0.157384	0.101691	0.0802595	0.113111	0.152985	0.141617	0.203178	0.165926
gi|116076345	4.92393	5.63345	7.10875	5.88871	3.33897	4.56405	4.22428	4.04243	9.34769	9.22882	8.98358	9.1867
gi|116076346	0.176865	0.153434	0.340545	0.223615	0.169893	0.299184	0.381663	0.28358	0.0169619	0	0.0294369	0.0154663
gi|116076348	2.03605	2.74576	1.72496	2.16892	1.08882	0.632889	0.795529	0.83908	0.277801	0.29876	0.305077	0.29388
gi|116076350	0.0561646	0.0559953	0	0.0373866	0.14739	0.109906	0.152689	0.136662	0	0.079845	0.0636673	0.0478374
gi|116076351	2.13157	2.13023	1.92536	2.06239	1.524	1.27811	1.25634	1.35282	0	0.797469	0.674376	0.490615
gi|116076352	3.3142	7.05269	3.69132	4.68607	0.337662	0.326374	0.205952	0.289996	1.25946	2.67789	1.66199	1.86644
gi|116076353	7.91169	7.97692	8.39921	8.09594	6.66336	7.98388	8.54605	7.7311	19.7624	12.9339	10.2201	14.3054
gi|116076355	0.593587	0.580959	0.301945	0.492164	1.42491	1.03966	1.00014	1.1549	0.856655	1.38368	1.28044	1.17359
gi|116076356	6.4941	6.41241	4.57204	5.82618	12.208	12.8318	15.6915	13.5771	13.7527	10.5429	10.9717	11.7558
gi|116076357	8.22171	9.22812	9.9123	9.12071	7.07712	8.57425	14.9101	10.1872	11.3929	14.1054	12.1985	12.5656
gi|116076358	9.41136	6.69636	0.78238	5.63003	0.0271037	0	0	0.00903456	0.122899	0	0	0.0409662
gi|116076359	0.762293	0.446343	0.550821	0.586486	0.114508	0.062595	0.0529775	0.0766935	0	0.0243342	0.0466101	0.0236481
gi|116076360	7.02119	6.25854	4.41104	5.89692	4.75183	3.9829	5.12824	4.62099	15.6303	11.9122	11.459	13.0005
gi|116076361	7.70996	6.27069	8.05883	7.34649	6.92977	7.19586	10.8326	8.31942	16.3661	10.8202	5.00194	10.7294
gi|116076362	5.22881	4.79369	5.02373	5.01541	1.81363	1.83901	2.32894	1.99386	0.193342	0.689205	0.806627	0.563058
gi|116076363	4.58637	3.23794	3.95319	3.92583	1.00131	0.772636	0.692802	0.82225	0.447662	0.892717	0.969634	0.770004
gi|116076364	0.169171	0.229949	0.18722	0.195446	1.0983	1.24309	1.30441	1.21527	0	0.359923	0.260694	0.206872
gi|116076366	0.294766	0.438776	0.363587	0.36571	0.373523	0.390199	0.308207	0.35731	0.313064	0.473275	0.33626	0.3742
gi|116076368	101.461	92.4331	111.416	101.77	55.4025	72.0375	58.688	62.0427	84.9068	79.7676	111.204	91.9594
gi|116076369	10.7706	12.0722	12.8878	11.9102	6.76636	8.98734	10.4053	8.71966	3.08088	3.77862	3.80507	3.55486
gi|116076370	9.64523	8.20013	11.5103	9.78524	7.97234	10.7785	8.21483	8.98855	3.7746	3.7767	4.93538	4.16223
gi|116076371	1.55411	1.90783	2.10808	1.85667	7.67296	7.45667	6.4334	7.18768	6.96488	8.95248	6.3813	7.43289
gi|116076375	5.15958	4.28491	4.55927	4.66792	19.3155	19.0919	25.2872	21.2315	31.2899	12.3673	13.2431	18.9668
gi|116076376	1.29808	2.03761	1.29563	1.54377	0	0.318303	0	0.106101	1.72713	0	0.948936	0.892023
gi|116076378	0	0.263107	0	0.0877022	-	-	-	-	-	-	-	-
gi|116076382	0.106104	0.0965228	0.0914756	0.0980341	0.162064	0.331492	0.265397	0.252984	0.286601	0.176291	0.232266	0.231719
gi|116076383	0.858464	1.07081	1.30875	1.07934	1.20288	1.19398	1.48996	1.29561	1.94447	1.34654	1.95263	1.74788
gi|116076384	8.6499	7.01726	8.13436	7.93384	0.093887	0.0978457	0.0672929	0.0863419	0	23.8636	16.7029	13.5222
gi|116076385	15.9218	16.5025	15.0528	15.8257	19.1929	20.5144	17.6849	19.1307	11.3458	11.9948	9.01759	10.7861
gi|116076386	3.21026	3.36691	4.1774	3.58486	3.14756	4.37889	4.57553	4.03399	1.85713	2.57722	3.30697	2.58044
gi|116076388	14.1215	30.1286	10.1573	18.1358	1.40606	1.06249	1.52899	1.33251	15.7532	16.3951	8.74745	13.6319
gi|116076389	0.0980692	0.080903	0.138925	0.105966	0.276508	0.324078	0.371607	0.324064	0.174543	0.154184	0.167914	0.165547
gi|116076390	46.6899	52.26	882.258	327.069	-	-	-	-	-	-	-	-
gi|116076391	1975.18	1620.34	2120	1905.17	677.103	864.595	776.811	772.836	2425.5	2489.36	2428.63	2447.83
gi|116076394	0.0269445	0.0576606	0.0388477	0.0411509	0.0796767	0.080319	0.116157	0.0920508	0.16472	0.104654	0.0854047	0.118259
gi|116076395	3.53527	3.3207	4.16373	3.67323	2.80651	2.52107	1.57516	2.30091	3.50138	4.24184	4.488	4.07707
gi|116076398	0.851937	0.913246	0.765783	0.843655	1.19938	1.51334	1.58111	1.43127	1.60961	1.73683	1.40424	1.58356
gi|116076401	1.56469	1.68224	1.66752	1.63815	0.75472	0.664101	0.467643	0.628821	1.46238	1.72691	1.28452	1.49127
gi|116076404	0.345166	0.346657	0.234952	0.308925	1.94926	2.10498	1.65146	1.9019	2.91359	2.52918	2.53731	2.66003
gi|116076405	0.319321	0.344739	0.373366	0.345808	0.135709	0.162986	0.205795	0.168164	0.171843	0.948864	0.807647	0.642785
gi|116076406	40.5933	39.6214	47.3756	42.5301	35.6745	38.9541	82.7326	52.4537	99.653	115.837	111.35	108.946
gi|116076407	0.522287	0.604343	0.601207	0.575946	0.30466	0.224213	0.248952	0.259275	0.336186	0.275496	0.303644	0.305109
gi|116076409	1.40147	1.20109	2.98363	1.86206	1.39319	1.54965	1.04077	1.32787	2.31951	1.55759	3.23472	2.37061
gi|116076410	0.33098	0.376525	0.390196	0.3659	2.5549	2.38744	2.03978	2.32737	0.547344	0.743647	0.45998	0.583657
gi|116076416	3.21086	2.43676	2.47748	2.70836	1.72043	1.62299	1.44943	1.59762	4.32063	2.99886	3.11194	3.47714
gi|116076419	0.374051	0.503796	0.498199	0.458682	0.865922	1.13291	1.19581	1.06488	0.546774	0.663585	0.643718	0.618025
gi|116076421	0.866325	0.885003	1.04922	0.933516	0.521461	0.627331	1.32955	0.826115	1.76013	0.765754	0.844087	1.12332
gi|116076422	0.127509	0.135228	0.164123	0.142287	0.385778	0.308051	0.415565	0.369798	0.0893947	0.0721798	0.0700758	0.0772168
gi|116076423	0.693614	0.634914	0.441139	0.589889	4.12652	1.48558	2.97758	2.86323	1.56297	4.26183	4.66237	3.49572
gi|116076424	4.26784	5.13641	5.17479	4.85968	8.59794	10.0763	10.8635	9.84593	9.13652	6.56353	8.67214	8.12407
gi|116076427;gi|116076322;gi|116077586	1.4652	1.50995	0.893289	1.28948	1.27344	1.40773	1.57435	1.4185	2.42615	2.90129	2.98849	2.77198
gi|116076429	0.0857277	0.0927317	0.0539839	0.0774811	0.0933442	0.0977405	0.112759	0.101281	0.162032	0.0477929	0.0599893	0.0899379
gi|116076430	0.547257	0.719188	0.716589	0.661011	1.77097	1.95257	2.35812	2.02722	2.75543	2.81002	2.35308	2.63951
gi|116076431	30.1308	27.3442	28.5036	28.6595	19.5177	19.408	22.861	20.5956	81.3129	54.53	41.582	59.1416
gi|116076433	4.16342	4.04646	3.55492	3.9216	4.19042	5.20309	4.28305	4.55885	4.26057	2.99158	3.35978	3.53731
gi|116076434	19.3414	18.4664	19.5294	19.1124	15.4302	18.9433	23.2215	19.1983	22.1393	21.8771	20.2342	21.4168
gi|116076436	199.96	339.358	265.636	268.318	333.139	300.03	358.426	330.532	277.137	219.07	238.072	244.76
gi|116076437	3.53087	4.69565	4.47494	4.23382	6.24376	8.31245	8.5131	7.68977	3.14899	5.9375	4.80614	4.63088
gi|116076439	1.56671	1.01326	0.801958	1.12731	1.77879	1.43815	1.27921	1.49872	1.93089	2.27206	0.734963	1.64597
gi|116076440	0.862518	0.823506	0.569555	0.751859	0.3395	0.305621	0.371879	0.339	1.11582	0.781973	0.764892	0.887561
gi|116076441	0.724122	0.429357	0.555343	0.569607	1.68603	1.9977	1.69749	1.79374	1.05582	0.70031	0.481003	0.745711
gi|116076445	0	0	0.216294	0.0720979	-	-	-	-	-	-	-	-
gi|116076447	137.709	83.9854	70.7148	97.4698	101.83	59.7599	88.6605	83.4167	240.586	159.592	205.325	201.834
gi|116076448	0.525847	0.708711	0.456593	0.563717	0.369088	0.35731	0.253416	0.326604	0.525663	0.283445	0.273234	0.360781
gi|116076449	2.32708	3.25697	2.28349	2.62251	3.67191	3.432	3.89544	3.66645	5.08947	6.97986	6.08687	6.05206
gi|116076450	2.36955	2.45847	2.13118	2.31974	2.22736	1.8246	1.67707	1.90968	1.27992	1.81581	1.48712	1.52762
gi|116076451	0.052738	0.0579137	0.0723645	0.0610054	0	0.0084986	0	0.00283287	0.042481	0.0341637	0	0.0255483
gi|116076452	0.123434	0.111712	0.16873	0.134625	0.0642672	0.124082	0.129595	0.105981	0.171984	0.187536	0.14091	0.16681
gi|116076453	25.2135	33.5663	34.9221	31.234	15.0451	16.67	18.7054	16.8068	43.4074	40.469	29.0997	37.6587
gi|116076454	0.0669089	0.0597611	0.108594	0.0784213	0.0703364	0.117635	0.121942	0.103304	0.135974	0.0658574	0.0699543	0.0905954
gi|116076455	1.66679	1.95308	1.73411	1.78466	1.50331	1.34017	1.21286	1.35212	0.765367	1.10475	1.10631	0.992142
gi|116076456	0	0.0792934	0.0888022	0.0560319	-	-	-	-	-	-	-	-
gi|116076457	0.998986	1.20555	0.958434	1.05432	1.56564	1.10367	1.19177	1.28702	0.885595	0.621539	0.756049	0.754394
gi|116076459	84.6696	85.428	107.218	92.4384	42.0735	56.8328	55.4234	51.4432	94.4415	85.4545	90.5597	90.1519
gi|116076460	1.88613	1.90636	1.65694	1.81648	5.32053	6.61306	7.19095	6.37485	15.2503	9.01188	10.3187	11.527
gi|116076462	41.5249	40.8513	29.5615	37.3126	14.1026	9.49712	10.0792	11.2263	20.1747	16.8724	18.555	18.5341
gi|116076463;gi|116077057	0.629929	0.684719	0.633805	0.649484	-	-	-	-	-	-	-	-
gi|116076465	3.29778	3.2637	3.15744	3.23964	2.44863	3.03578	3.32395	2.93612	2.46785	2.38306	2.65761	2.50284
gi|116076466	2.07179	1.67566	2.27862	2.00869	0.329637	0.207499	0.517648	0.351595	1.79831	0.774948	1.09931	1.22419
gi|116076469	0.762442	0.668523	0.93647	0.789145	0.901199	1.4841	1.37674	1.25401	2.31092	2.76606	1.52765	2.20154
gi|116076471	4.0175	4.03968	5.14348	4.40022	7.39109	14.7002	10.321	10.8041	5.48768	5.06798	4.77096	5.10887
gi|116076472	0.110188	0.116835	0.100147	0.109056	0.195973	0.267749	0.232887	0.232203	0.831657	0.548709	0.729424	0.703263
gi|116076476	0	0.0209075	0	0.00696918	0.0400222	0	0.0679961	0.0360061	0.101706	0	0	0.0339019
gi|116076478	0.0349443	0.0415883	0.0469671	0.0411666	0.046891	0.063381	0.0889051	0.0663924	0.0793071	0.0559917	0.0696434	0.0683141
gi|116076479	0	0	0.0194867	0.00649557	-	-	-	-	-	-	-	-
gi|116076481	3.30772	3.24579	4.96877	3.84076	2.95731	3.50567	3.21279	3.22526	10.5129	10.7268	10.7852	10.6749
gi|116076482	0.3586	0.318029	0.276141	0.31759	1.10884	0.782733	1.06417	0.985247	0.129751	0.108208	0.101778	0.113246
gi|116076484	129.729	114.304	121.981	122.004	26.9517	38.3917	36.8108	34.0514	80.0894	44.9788	46.6539	57.2407
gi|116076486	27.1122	7.19138	25.1609	19.8215	-	-	-	-	-	-	-	-
gi|116076489	1.12201	1.18814	0.808915	1.03969	1.03604	1.14869	0.920508	1.03508	1.83407	1.59148	1.15207	1.52587
gi|116076491	0.430646	0.398517	0.38958	0.406248	0.72344	0.642263	0.396304	0.587335	0.783719	0.627273	0.818385	0.743125
gi|116076494	0.299444	0.325819	0.24417	0.289811	0.191952	0.177701	0.171974	0.180542	0.495294	0.545145	0.385604	0.475348
gi|116076496	0.0894509	0.114704	0	0.0680515	0.189732	0.203042	0.168682	0.187152	0.146009	0	0.114231	0.0867466
gi|116076497	0.325358	0.33412	0.258913	0.30613	2.10863	2.40941	1.73078	2.08294	1.21122	1.2015	0.990234	1.13432
gi|116076498	0.0212584	0.0260166	0.0158995	0.0210582	0.903475	1.21769	0.660597	0.927256	0	0.0355568	0.0236017	0.0197195
gi|116076500	0.166447	0.0972162	0.166484	0.143382	0.277226	0.345305	0.307776	0.310102	0.101823	0	0.0864493	0.0627576
gi|116076501	2.44392	1.97115	1.81982	2.0783	0.0880161	0.0742871	0.128624	0.0969757	2.01882	1.7001	1.19075	1.63656
gi|116076504	1.08848	1.36848	1.36088	1.27261	1.64188	1.26091	1.30903	1.40394	0.385742	0.453895	0.52988	0.456506
gi|116076506	8.78291	4.20788	8.51748	7.16942	2.2053	2.80605	2.98227	2.66454	9.26593	6.46023	7.34622	7.69079
gi|116076508	14.7761	13.7349	16.309	14.94	-	-	-	-	5.47209	5.40393	3.38359	4.7532
gi|116076509	13.902	11.2264	10.0634	11.7306	10.8132	15.3689	12.0722	12.7514	47.6625	35.1441	23.6464	35.4843
gi|116076512	1.92494	1.94427	1.98703	1.95208	0.54107	0.677027	0.616095	0.611397	1.97771	1.89654	1.42566	1.76664
gi|116076513	0.119489	0.144308	0.129181	0.130993	0.724023	0.823286	0.591127	0.712812	0.128145	0.0852531	0.0575794	0.090326
gi|116076514	0.899355	0.952675	0.75669	0.869573	0.308336	0.412794	0.652037	0.457722	0.771602	0.941012	0.241444	0.651353
gi|116076517	0.0257574	0.0357585	0.0335094	0.0316751	-	-	-	-	0	0.0154793	0.0152624	0.0102472
gi|116076518	18.3233	27.2592	27.629	24.4038	21.6317	22.4785	27.4474	23.8526	47.5666	32.5186	23.094	34.3931
gi|116076519	3.28147	3.12957	4.65259	3.68788	1.14155	1.43611	1.3128	1.29682	0.139945	0.405506	0.354897	0.300116
gi|116076520	0.359327	1.15751	0.252856	0.589899	-	-	-	-	0.0379601	0.0827996	0.0337669	0.0515089
gi|116076521	10.2796	11.4785	9.6713	10.4765	6.23559	6.57918	8.47573	7.09683	15.592	24.0362	10.9605	16.8629
gi|116076522	0.219511	0.288156	0.162891	0.223519	0.218068	0.263641	0.139501	0.20707	0.174901	0.0918853	0.0846468	0.117145
gi|116076523	0.43739	0.443741	0.433735	0.438289	0.296811	0.370992	0.400414	0.356072	0.424246	0.388295	0.376441	0.396327
gi|116076525	0.0819402	0.101179	0.073249	0.0854562	0.0991976	0.1069	0.131382	0.112493	0	0.0768027	0.0603051	0.0457026
gi|116076527	13.0475	10.0127	12.2006	11.7536	11.5876	10.7292	14.7053	12.3407	9.19946	4.53497	6.99203	6.90882
gi|116076534	8.39823	9.08589	6.2496	7.91124	10.0963	13.4096	13.2463	12.2507	24.2233	20.6777	16.5635	20.4882
gi|116076536	0.145828	0.194225	0	0.113351	0.223606	0.280296	0.163991	0.222631	0	0.117237	0.137761	0.0849992
gi|116076539	24.8001	17.0421	34.1469	25.3297	28.1737	43.3514	46.7439	39.423	35.1232	48.2934	36.0451	39.8206
gi|116076540	0.0649756	0.0642911	0.10603	0.0784322	-	-	-	-	0.0469208	0.0616787	0.0991206	0.06924
gi|116076541	18.1335	18.6157	15.4816	17.4103	18.6192	17.6889	22.3966	19.5683	27.6243	21.0873	21.6403	23.4506
gi|116076543	0.080447	0.105451	0.112296	0.0993981	-	-	-	-	-	-	-	-
gi|116076544	1.52182	0.66093	1.0683	1.08368	2.97511	3.9112	3.56524	3.48385	0.658844	0.545661	0.633612	0.612706
gi|116076545	6.05899	5.34494	4.4744	5.29278	7.88247	8.98142	9.90726	8.92371	1.78219	4.80036	3.19391	3.25882
gi|116076547	0.0223669	0.0266817	0	0.0163495	0.273476	0.305177	0.402962	0.327205	0.748015	0.390635	0.491546	0.543399
gi|116076548	5.94724	4.06119	5.28411	5.09751	2.65323	3.4195	3.52414	3.19896	3.30639	1.96173	2.99028	2.7528
gi|116076549	74.0241	42.4943	66.0141	60.8441	15.0728	34.7838	37.2117	29.0227	77.1131	48.2789	54.4359	59.9427
gi|116076550	0.465683	0.535658	0.469796	0.490379	0.411106	0.443874	0.672011	0.508997	0.408311	0.503068	0.325581	0.41232
gi|116076551	0.862667	1.30526	1.29881	1.15558	1.33658	0.999276	0.979244	1.10503	0.898594	0.382464	0.37974	0.553599
gi|116076553	0.0781033	0.0731386	0.125131	0.0921243	-	-	-	-	0.120275	0	0.074434	0.0649031
gi|116076555	0.0831467	0.0796528	0	0.0542665	0.0443407	0.0665943	0.0510684	0.0540011	0.11367	0	0.17905	0.0975731
gi|116076556	0.333457	0.407896	0.450138	0.397164	0.466984	0.358592	0.411387	0.412321	0.326069	0.295072	0.447731	0.356291
gi|116076559	0.0399906	0.0194782	0.0362051	0.0318913	-	-	-	-	0.0311446	0	0	0.0103815
gi|116076560	0.11049	0.130784	0.0867997	0.109358	0.151927	0.137836	0.138071	0.142611	0.0448685	0	0.0362341	0.0270342
gi|116076561	1.1361	1.5432	1.21673	1.29867	0.443961	0.401973	0.393892	0.413276	0.363308	0.563275	0.353066	0.42655
gi|116076562	0	0.0928684	0.0801163	0.0576615	0.0671501	0.0700444	0.136974	0.0913894	0.0902712	0.0885176	0.0695073	0.0827654
gi|116076563	0.22272	0.28193	0.24504	0.249897	0.141653	0.132001	0.117903	0.130519	0	0.150563	0.17956	0.110041
gi|116076568	0.391728	0	0.721658	0.371129	-	-	-	-	-	-	-	-
gi|116076573	17.8793	7.93035	7.83324	11.2143	12.9661	13.5711	19.6294	15.3889	7.17487	4.91007	4.93635	5.67377
gi|116076575	0.299973	0.476763	0.448756	0.408497	0.251933	0.262325	0.289856	0.268038	0.468767	0.455238	0.370134	0.431379
gi|116076576	6.34725	5.83034	6.56265	6.24675	5.67623	3.8122	3.9909	4.49311	0.714723	1.40351	1.304	1.14075
gi|116076578	13.0822	7.28451	8.40965	9.5921	6.81305	10.5831	12.8641	10.0868	7.81366	6.3595	6.85793	7.01037
gi|116076579	8.30972	10.9182	8.87326	9.36705	12.1844	14.7262	14.3734	13.7613	12.0369	15.5093	8.86454	12.1369
gi|116076583	0.161952	0.223774	0.155721	0.180482	0.0945785	0.153133	0.243371	0.163694	0.258102	0.210511	0.204033	0.224215
gi|116076584	2.29568	1.47892	1.83597	1.87019	1.55315	1.76149	2.43191	1.91551	1.46386	2.05687	1.05563	1.52545
gi|116076585	0.0893075	0	0.102219	0.0638421	0.255989	0.198882	0.123358	0.192743	0.197847	0	0	0.0659491
gi|116076586	0.615541	0.503918	0.571343	0.563601	0.556593	1.12412	0.853993	0.844904	0.569714	0.794938	1.08075	0.815134
gi|116076587	3.09911	3.8602	2.31534	3.09155	2.75775	2.72235	3.79522	3.09178	4.20328	5.32645	3.84593	4.45855
gi|116076588	0.185562	0.152994	0.175473	0.171343	0	0.0208966	0	0.00696552	0	0	0.427393	0.142464
gi|116076589	1.13995	1.15463	1.07143	1.122	0.190313	0.165522	0.155152	0.170329	0	0.074406	0.184491	0.0862991
gi|116076590	7.2516	7.59326	8.33561	7.72682	8.65776	7.97369	9.41808	8.68318	2.00171	2.24194	2.75245	2.33203
gi|116076593	0.68417	0.749	0.524783	0.652651	0.755187	0.881434	0.855828	0.830816	0.621963	0.479897	0.394937	0.498932
gi|116076594	1.01555	1.08893	1.32704	1.14384	3.52981	4.09998	2.60998	3.41326	1.03506	1.32505	0.902925	1.08768
gi|116076596	0.127642	0	0	0.0425474	0.276447	0.365894	0.265411	0.302584	0.149479	0.250832	0.177524	0.192612
gi|116076598	0.0237905	0.0095146	0	0.0111017	0.149742	0.137053	0.0814519	0.122749	0	0.0509504	0	0.0169835
gi|116076600	0.147489	0.180569	0.163443	0.163834	0.116314	0.159786	0.267643	0.181248	0.413035	0.288993	0.245593	0.315874
gi|116076603	7.74704	6.67763	5.12957	6.51808	3.02763	3.79707	6.85124	4.55865	11.0611	9.33678	6.9002	9.09936
gi|116076604	0.371337	0.346287	0.42011	0.379245	1.04972	1.22937	1.09193	1.12367	0.784542	0.49579	0.792148	0.690827
gi|116076605	4.41989	5.70076	8.54232	6.22099	4.44632	4.28153	10.4297	6.38586	10.7864	10.6173	7.55952	9.6544
gi|116076607	0.643378	0.51111	0.551666	0.568718	0.937994	0.987798	1.34501	1.09027	1.01271	0.743802	0.873773	0.87676
gi|116076611	0.604465	0.448221	0.562349	0.538345	0	0.196405	0	0.0654684	0.12251	0.161663	0.103187	0.12912
gi|116076612	0.47664	0.545174	0.511665	0.511159	0.338128	0.406841	0.367667	0.370879	0	0.246555	0.214935	0.15383
gi|116076613	0.359401	0.274829	0.440458	0.358229	0.960842	1.09929	0.594966	0.885033	1.00988	0.991787	1.3334	1.11169
gi|116076614	2.42552	1.86268	1.68914	1.99245	5.10169	4.84164	3.60838	4.51724	1.65684	1.45413	1.12662	1.41253
gi|116076616	2.75938	3.29529	3.21747	3.09071	2.98007	2.45387	2.94432	2.79276	2.49668	1.48425	1.27956	1.7535
gi|116076618	0.226532	0.27653	0.251231	0.251431	0.18668	0.195846	0.282794	0.221773	0.0987354	0.0380176	0.0669128	0.0678886
gi|116076621	0.161967	0.193329	0.255475	0.20359	0.042517	0.0487716	0.0796956	0.0569947	0	0.215537	0.191323	0.13562
gi|116076623	181.344	169.484	184.442	178.423	51.8193	67.4067	72.2662	63.8307	261.808	279.54	239.889	260.413
gi|116076624	2.07679	1.91735	2.51594	2.17002	2.17242	1.79375	1.91195	1.95937	1.4535	1.6735	1.40696	1.51132
gi|116076625	80.4766	83.9297	85.0257	83.144	28.3029	32.1595	29.9198	30.1274	12.821	35.2443	36.6378	28.2344
gi|116076626	22.1701	22.4923	26.7077	23.7901	16.2919	19.3524	21.758	19.1341	53.1204	41.8771	36.0645	43.6873
gi|116076629	0.307137	0.258643	0.264394	0.276725	0.249946	0.198569	0.19806	0.215525	0	0.139788	0.146725	0.0955045
gi|116076631	19.2118	13.7592	16.3154	16.4288	11.74	10.0368	9.48194	10.4196	3.24528	2.54551	2.22354	2.67144
gi|116076632	0	0.0441241	0	0.014708	0.0912988	0.116159	0.131134	0.112864	-	-	-	-
gi|116076633	0.118886	0.123647	0.113339	0.118624	0.0678066	0.0972209	0.151748	0.105592	0.0749838	0.192195	0.0635701	0.11025
gi|116076634	0.481258	0.592499	1.26989	0.781217	0.607978	0.567012	0.760607	0.645199	0	0.639101	0.656302	0.431801
gi|116076635	29.7303	22.9974	24.8791	25.8689	56.3684	55.2804	57.9509	56.5332	123.028	108.43	92.1631	107.874
gi|116076636	3.93592	5.3824	4.8588	4.72571	5.01153	5.60237	5.62218	5.41202	6.72725	4.81808	5.77252	5.77262
gi|116076637	0	2.67201	0	0.890672	0.0156815	0.0242158	0	0.0132991	-	-	-	-
gi|116076638	2.9358	6.67865	2.04716	3.8872	0.14128	0.0947903	0.0873459	0.107805	0.294294	0.635176	0.539792	0.489754
gi|116076641	0.0863013	0.101306	0.0819846	0.0898639	0.4952	0.44815	0.425961	0.456437	0.226669	0.151911	0.209824	0.196135
gi|116076642	0.0403911	0.051855	0.0445402	0.0455955	0.0388871	0	0	0.0129624	-	-	-	-
gi|116076643	1.24646	0.934251	0.815176	0.998628	0.222672	0.232524	0.235537	0.230244	0.760426	0.744267	0.940919	0.815204
gi|116076644	1.09125	0.729615	0.808467	0.876444	1.93776	2.35711	2.89547	2.39678	3.81789	1.37862	2.06856	2.42169
gi|116076645	0.837301	1.08483	1.13618	1.01944	0.875667	0.769084	0.697829	0.78086	1.55091	1.39861	1.24322	1.39758
gi|116076646	1.14618	1.1275	0.927476	1.06705	0.746491	1.1061	0.557394	0.803329	0.634139	0.528719	0.764114	0.642324
gi|116076647	0.176771	0.153895	0.205098	0.178588	0.709229	0.872455	1.05677	0.879483	0	0.369437	0.31461	0.228016
gi|116076649	6.88472	6.66397	10.5553	8.03466	3.93686	3.37938	3.66104	3.65909	2.96971	3.10434	3.31027	3.12811
gi|116076651	3.39356	2.24326	3.41951	3.01878	1.1065	1.48176	2.10602	1.56476	3.13423	1.88569	3.14765	2.72252
gi|116076652	116.215	102.809	122.676	113.9	194.453	211.561	350.07	252.028	566.808	329.985	274.303	390.365
gi|116076653	3.17921	3.77461	2.86939	3.2744	3.53302	3.53429	2.10113	3.05614	3.39392	6.90857	3.28175	4.52808
gi|116076656	0.0451927	0.0308119	0.0331998	0.0364015	0.055633	0.0490117	0.0474946	0.0507131	0.0288836	0.0298135	0	0.0195657
gi|116076657	0.553289	0.655818	0.47637	0.561826	0.430393	0.378721	0.412304	0.407139	0.533192	0.467557	0.490331	0.497027
gi|116076658	0.040759	0.0353308	0	0.0253632	-	-	-	-	0.026959	0.0389907	0	0.0219832
gi|116076660	9.58145	12.6482	12.4639	11.5645	10.269	12.0148	10.5609	10.9482	14.9585	13.3414	15.154	14.4847
gi|116076664	0.2468	0.246986	0.348088	0.280625	2.3507	2.30229	2.93264	2.52854	0.31514	0.352407	0.274633	0.31406
gi|116076665	0	0.0461082	0	0.0153694	-	-	-	-	-	-	-	-
gi|116076666	11.9202	18.3024	18.318	16.1802	12.2798	14.2963	19.4646	15.3469	9.90412	18.2975	11.7389	13.3135
gi|116076671	0.169848	0.215104	0.253795	0.212916	0.687987	0.705641	0.824269	0.739299	0.0443568	0.41358	0.137941	0.198626
gi|116076674	1.00838	0.526497	0.518025	0.684301	1.53024	1.32725	2.72806	1.86185	2.43862	1.30584	0.787873	1.51078
gi|116076675	0.617469	0.662854	0.531243	0.603855	2.21082	1.83996	2.70805	2.25294	1.76966	2.91147	1.35541	2.01218
gi|116076677	11.3066	9.60622	12.5479	11.1536	9.54918	11.7375	8.6714	9.98604	7.30016	7.60331	5.96978	6.95775
gi|116076678	0.119439	0.130141	0.106731	0.11877	0.501999	0.375793	0.481333	0.453042	0.137257	0.0737552	0.0643378	0.0917832
gi|116076681	0.69574	0.476464	0.602996	0.591734	5.53646	5.33399	4.83745	5.23597	0.532869	0.40189	0.406326	0.447028
gi|116076685	8.0091	7.05573	7.76814	7.61099	9.20749	9.08009	6.24622	8.17793	4.51797	6.5031	7.99922	6.3401
gi|116076686	60.2932	53.5962	55.584	56.4911	31.3501	39.2205	38.4822	36.3509	49.2018	29.969	63.8276	47.6661
gi|116076687	0.371821	0.386066	0.291674	0.349854	0.225345	0.24471	0.287787	0.252614	0.16652	0	0.366174	0.177565
gi|116076688	29.179	29.6381	39.7222	32.8464	17.7409	24.1684	22.8519	21.5871	59.273	50.7454	51.7783	53.9322
gi|116076689	0.120557	0.0772182	0.15424	0.117338	-	-	-	-	-	-	-	-
gi|116076690	0.746471	0.642304	0.769361	0.719379	0.140121	0.197783	0.0990828	0.145662	-	-	-	-
gi|116076691	4.84457	4.22402	7.81833	5.62897	3.06119	3.92567	2.79295	3.25994	1.98218	2.23709	1.49339	1.90422
gi|116076693	0.550026	0.807309	0.591021	0.649452	0.795104	1.22947	0.70836	0.910978	1.17622	1.44979	1.29584	1.30729
gi|116076695	101.891	135.309	142.205	126.468	149.047	135.672	112.634	132.451	159.685	132.727	184.836	159.083
gi|116076696	6.43625	7.9091	9.80695	8.05077	6.59741	8.51505	9.23633	8.11627	4.00047	8.7655	8.30969	7.02522
gi|116076697	0.403441	0.343666	0.292092	0.3464	0.296169	0.235067	0.234022	0.255086	0	0.055124	0.0627684	0.0392975
gi|116076699	2.07387	1.73498	2.17034	1.99306	5.90499	8.10459	9.46224	7.82394	6.70666	6.66271	4.68147	6.01695
gi|116076700	0.719771	0.499772	0.542871	0.587471	1.18059	0.628844	0.686381	0.831938	0.375972	0.886519	1.02871	0.763735
gi|116076703	0.734357	0.794807	0.726478	0.75188	0.385136	0.370959	0.349118	0.368404	0.490701	0.64313	0.279628	0.471153
gi|116076705	1.00101	0.797641	1.03789	0.945515	2.06276	1.75731	0.986276	1.60212	2.20175	2.375	1.62749	2.06808
gi|116076706	0.0545131	0.0660374	0.0489254	0.056492	0.182668	0.229979	0.194704	0.20245	0.118746	0.184447	0.236367	0.179853
gi|116076709	0.122287	0.14896	0.188263	0.15317	0.16645	0	0	0.0554833	0.216187	0	0.152925	0.123037
gi|116076710	0.229954	0.232075	0	0.154009	0	0.123529	0.104848	0.0761256	0.24895	0.34703	0.206272	0.267417
gi|116076711	3.61665	4.11393	4.6991	4.14323	5.31907	6.3677	7.86561	6.51746	16.7931	13.8502	14.1186	14.9207
gi|116076712	0.6058	0.570987	0.6105	0.595762	0.487526	0.359513	0.286982	0.378007	0.870419	0.885227	0.628073	0.794573
gi|116076713	3.49408	1.95758	2.93175	2.79447	1.8431	1.98231	1.96399	1.9298	1.3948	1.57903	1.43047	1.4681
gi|116076714	0.150244	0.154664	0.153549	0.152819	0.107298	0.0877882	0.105609	0.100231	0	0.0301808	0.0404125	0.0235311
gi|116076715	1.44256	1.61836	1.79905	1.61999	7.51043	8.23253	6.84139	7.52812	6.80431	6.77273	7.29278	6.9566
gi|116076717	0.486682	0.373807	0.535765	0.465418	0.197779	0.258793	0.219105	0.225226	0.25675	0.228755	0.261078	0.248861
gi|116076719	2.37628	2.12952	1.96149	2.15576	2.26921	1.7725	2.14057	2.06076	3.72619	3.7672	2.54465	3.34601
gi|116076721	0.305481	0.325798	0.217864	0.283048	0.11913	0.155435	0.186177	0.153581	-	-	-	-
gi|116076723	13.3917	14.0345	12.6662	13.3641	9.00265	12.2546	13.1505	11.4692	25.7691	19.0522	17.9958	20.939
gi|116076724;gi|116077123	1.23345	0.897758	1.32237	1.15119	0.508331	0.477257	0.778952	0.58818	2.87595	2.06823	3.57128	2.83849
gi|116076725	0.692971	0.620286	0.963453	0.758903	0.128467	0.144282	0.153664	0.142138	-	-	-	-
gi|116076727	0.147405	0.152412	0.126671	0.142163	0.278334	0.276237	0.26077	0.271781	0.0379184	0.0476637	0.0360106	0.0405309
gi|116076730	0.508591	0.493385	0.495505	0.49916	0.460506	0.423976	0.24265	0.375711	0.139762	0.367831	0.39005	0.299214
gi|116076732	0.842839	0.926102	0.662575	0.810506	0.936506	0.671896	0.753779	0.787394	0.848185	0.98564	0.775095	0.86964
gi|116076733	0.36618	0.414486	0.329245	0.36997	0.345248	0.338694	0.318558	0.334167	0.382154	0.312061	0.409659	0.367958
gi|116076736	6.02092	9.0292	8.66158	7.9039	7.93149	8.97418	9.54173	8.8158	14.9515	14.8471	10.8765	13.5584
gi|116076737	3.67851	3.07132	4.01625	3.58869	5.69607	9.36918	8.61942	7.89489	15.4326	10.9158	7.04985	11.1328
gi|116076740	0.0111854	0.0393577	0	0.0168477	0	0.0218023	0.0264456	0.0160827	-	-	-	-
gi|116076744	0.37192	0.294422	0.577108	0.414483	0.207286	0.292074	0.477664	0.325675	2.87495	0.919525	2.17501	1.98983
gi|116076747	113.827	146.338	121.901	127.355	82.227	94.9383	91.3986	89.5213	464.067	252.092	227.723	314.627
gi|116076748	2.1875	2.38958	1.59716	2.05808	2.54066	2.56951	1.60176	2.23731	3.10188	2.68874	1.82135	2.53732
gi|116076749	2.34814	2.26122	1.69117	2.10018	3.4837	5.21625	6.27815	4.9927	8.70419	10.7412	5.99213	8.47918
gi|116076751	0	0	0.0911675	0.0303892	0.0437834	0	0.035204	0.0263291	0.20217	0	0	0.0673902
gi|116076752	0.702316	0.976009	0.827449	0.835258	2.54982	2.12462	2.97235	2.54893	1.21311	1.10661	0.80585	1.04186
gi|116076753	0.204588	0.175163	0.242426	0.207393	0.0953022	0.094764	0.132942	0.107669	0	0.180914	0.142955	0.107956
gi|116076754	0.70197	0.769297	0.572437	0.681235	0.767354	0.745009	0.586031	0.699465	1.62043	1.05243	1.17904	1.28397
gi|116076755	48.7374	52.4472	44.1854	48.4567	26.4031	33.5636	63.7123	41.2263	47.6548	47.0883	34.1842	42.9758
gi|116076756	5.98383	5.75037	4.62044	5.45155	1.70946	1.6026	1.18901	1.50036	0.286136	0.717149	1.05757	0.686953
gi|116076757	5.47603	5.7038	5.52113	5.56699	3.95845	3.06272	3.58155	3.53424	6.95783	7.09917	7.16451	7.07384
gi|116076758	0.146273	0.190586	0.136982	0.157947	0.819147	0.971814	0.883616	0.891526	1.32457	1.15072	1.00578	1.16036
gi|116076760	2.22285	2.48241	3.1809	2.62872	4.08246	3.56718	3.57204	3.74056	5.26463	4.75351	4.38689	4.80168
gi|116076761	43.0033	49.3911	34.0913	42.1619	31.9716	35.31	31.7553	33.0123	87.5948	70.0568	64.124	73.9252
gi|116076762	0.0565057	0.0660374	0.098631	0.0737247	-	-	-	-	-	-	-	-
gi|116076764	0.0522337	0.046835	0.0495446	0.0495378	0.0602609	0.0417267	0.0356898	0.0458924	0	0.0145517	0	0.00485055
gi|116076765	3.48399	3.40497	4.44533	3.7781	1.46783	1.37132	1.7354	1.52485	0.149168	1.27102	1.15353	0.857908
gi|116076766	2.0887	4.45118	0.935179	2.49169	-	-	-	-	0.0931828	0.170806	0.139399	0.134462
gi|116076768	96.4177	75.143	80.3697	83.9768	23.4898	47.8014	58.5012	43.2641	22.5551	42.3419	38.2417	34.3796
gi|116076769	2.75275	3.48899	3.06273	3.10149	4.93741	4.36968	5.33308	4.88006	5.0387	3.31756	4.23977	4.19868
gi|116076770	4.66721	4.39373	6.15767	5.07287	4.95463	4.70449	6.84717	5.50209	6.92371	5.0406	6.61355	6.19262
gi|116076775	12.7983	10.2804	6.184	9.75425	6.95953	12.0852	11.0276	10.0241	27.9589	25.8197	23.3403	25.7063
gi|116076777	9.131	8.98416	4.37452	7.49656	15.9578	20.7867	27.5388	21.4278	43.9374	30.5186	19.1857	31.2139
gi|116076779	7.80588	8.62682	5.34672	7.2598	8.60348	9.79378	9.47345	9.29024	32.8481	25.4912	22.0076	26.7823
gi|116076780	3.38659	2.88293	3.20828	3.15926	1.24951	1.31248	1.69705	1.41968	0	0.942872	0.867068	0.603313
gi|116076781	99.4487	106.231	89.8109	98.4968	62.2713	66.0483	92.2546	73.5248	69.1136	71.2758	81.926	74.1051
gi|116076782	0.208806	0.221162	0.228234	0.219401	0.282612	0.242256	0.193675	0.239514	0.290577	0.333053	0.261466	0.295032
gi|116076786	0.186966	0.271813	0.177674	0.212151	0.332088	0.468804	0.328637	0.37651	0.526522	0.503817	0.604509	0.544949
gi|116076788	2.93955	2.42446	4.71087	3.3583	2.75338	3.86482	3.64337	3.42053	1.47803	1.18208	2.37304	1.67772
gi|116076789	0.302989	0.299231	0.360252	0.320824	0.863996	1.04157	1.21504	1.0402	0.907594	0.639979	0.374866	0.640813
gi|116076791	0.509382	0.508832	0.269766	0.429327	0.797963	0.560237	0.471719	0.609973	0.153109	0.211157	0.278554	0.214273
gi|116076792	28.1619	33.9115	35.4563	32.5099	34.6853	39.7928	27.1447	33.8743	32.0681	30.8936	23.0532	28.6716
gi|116076793	0.143232	0.171899	0.18794	0.16769	0.363923	0.406709	0.301841	0.357491	1.68672	0.495052	1.00841	1.06339
gi|116076794	0.0997058	0.0969732	0.165415	0.120698	0.104742	0.0840454	0.0544825	0.0810898	0.0578854	0.0500279	0.0618647	0.0565927
gi|116076797	0.120873	0.128263	0.171602	0.140246	0.354148	0.354909	0.346129	0.351729	0.405806	0.23937	0.161811	0.268996
gi|116076798	232.693	229.23	253.914	238.613	310.233	388.061	433.638	377.311	370.572	245.362	213.667	276.534
gi|116076799	0.0142001	0.0247983	0.0175811	0.0188598	-	-	-	-	0.0130145	0.0110331	0.00822563	0.0107577
gi|116076800	0.51942	0.510958	0.481985	0.504121	0.407196	0.284572	0.314913	0.33556	0.095465	0.118363	0.111466	0.108431
gi|116076803	3.408	2.97277	2.38003	2.92027	1.46433	1.69107	1.02955	1.39498	1.61102	0.796333	1.40326	1.27021
gi|116076804	2.25133	2.19947	1.84318	2.09799	1.58183	1.1777	1.45147	1.40367	1.82054	1.48673	2.39185	1.8997
gi|116076805	12.9076	14.2056	14.0381	13.7171	12.5249	13.6997	17.214	14.4795	31.047	27.266	23.9219	27.4116
gi|116076808	8.17029	7.21213	6.29283	7.22508	4.79443	3.83983	3.89578	4.17668	4.44691	3.77536	4.43358	4.21862
gi|116076809	14.9472	15.0362	7.12564	12.3697	17.7541	18.1589	26.2948	20.7359	76.6249	44.0563	31.547	50.7427
gi|116076811	13.7734	12.4877	12.0868	12.7826	5.45417	5.92107	6.11611	5.83045	9.77413	9.78874	9.70362	9.7555
gi|116076812	3.90808	4.95521	4.55336	4.47221	2.89965	3.50238	3.81221	3.40475	2.67373	2.65021	2.92727	2.7504
gi|116076813	0.740982	0.387392	0.51892	0.549098	1.28248	1.45772	2.07443	1.60488	1.97094	1.24411	1.45292	1.55599
gi|116076814	10.2138	12.1314	11.0934	11.1462	5.89099	6.7433	8.79132	7.14187	28.0695	32.6389	27.6581	29.4555
gi|116076815	8.04618	7.98046	10.6626	8.89642	9.46981	13.3041	15.6052	12.793	15.4885	6.23864	11.9804	11.2358
gi|116076816	1.66931	1.73766	1.72183	1.7096	1.17557	0.958855	0.977579	1.03734	0.100459	0.386508	0.512487	0.333151
gi|116076818	0.739598	0.497803	0.584959	0.607453	1.34198	1.31245	1.14237	1.2656	0.284624	0.443017	0.351579	0.35974
gi|116076819	0.0966798	0.0577567	0.0938011	0.0827459	0.0689125	0.0778819	0.0749397	0.0739114	0	0.00738946	0.00578078	0.00439008
gi|116076820	7.28028	6.86896	5.02522	6.39148	8.33183	6.0911	5.89836	6.77376	9.03123	8.75413	8.11437	8.63325
gi|116076825	9.42965	8.25682	13.2446	10.3103	7.8921	11.7343	11.9085	10.5116	27.3749	32.7118	22.0056	27.3641
gi|116076828	0	0	0.0607021	0.020234	0.0674565	0.10324	0	0.0568987	-	-	-	-
gi|116076829	0.489174	0.597307	0.456697	0.514393	0.631263	0.662654	0.779733	0.691217	0	0.236911	0	0.0789704
gi|116076830	0	0	1.18154	0.393848	0.23697	0.199569	0.109029	0.181856	0.58786	1.49267	3.26854	1.78302
gi|116076832	0.494598	0.79177	0.72767	0.671346	0.667707	0.541885	0.275633	0.495075	0.296024	0.128363	0.236697	0.220361
gi|116076835	1.5721	1.48464	1.43268	1.49647	0.619766	0.619832	0.382818	0.540805	0.802659	0.840393	0.942425	0.861826
gi|116076836	1.51519	1.92939	1.79344	1.74601	2.71933	3.07995	3.43445	3.07791	0.579089	1.13781	0	0.5723
gi|116076837	0.136033	0.128375	0.0903625	0.118257	0.140355	0.154603	0.130302	0.141753	0.0960826	0.133864	0.0724371	0.100794
gi|116076841	21.9338	28.4557	23.8595	24.7497	10.3528	10.5085	11.5158	10.7923	1.90336	5.65186	5.49218	4.34913
gi|116076842	0.943905	0.488176	1.06522	0.832433	0.79061	0.794475	0.794408	0.793164	0.953826	1.73616	0.562968	1.08432
gi|116076844	0.224198	0.255272	0.254416	0.244629	0.673193	0.78099	0.945918	0.800034	0.224716	0.154964	0.237853	0.205845
gi|116076846	0.689856	0.651516	0.204338	0.515237	2.07782	1.61625	1.60567	1.76658	0.74525	0.925103	0.90686	0.859071
gi|116076848	0.335405	0.314997	0.286069	0.312157	0.960345	0.66966	0.826579	0.818861	0.0486277	0.334168	0.294806	0.225867
gi|116076849	0.0842889	0.0878119	0.0894979	0.0871995	0.151268	0.195218	0.112117	0.152868	0.0286113	0	0.0538723	0.0274945
gi|116076851	16.7525	8.78929	18.1972	14.5797	3.94619	3.82503	3.31202	3.69441	2.0167	1.51498	1.50364	1.67844
gi|116076853	2.00341	2.18566	2.15941	2.11616	2.67036	3.93915	5.17648	3.92867	8.30245	5.38326	5.49558	6.39377
gi|116076856	0.128181	0.154416	0.106239	0.129612	0.0273727	0	0.0240531	0.0171419	0	0	0.0209363	0.00697875
gi|116076857	0.312616	0.42554	0.387791	0.375316	0.376849	0.273268	0.30695	0.319022	0	0.547211	0	0.182404
gi|116076858	1.06648	1.27535	1.17036	1.17073	0.931283	1.2867	1.17757	1.13185	2.94436	2.82681	1.84375	2.5383
gi|116076859	21.1456	25.717	23.3596	23.4074	24.491	27.824	27.6611	26.6587	27.339	31.8662	26.3473	28.5175
gi|116076861	0.0937477	0.0983246	0.104196	0.0987562	0.242141	0.22274	0.217009	0.227296	0.145756	0.215527	0.210543	0.190609
gi|116076866	5.06415	3.78863	5.34423	4.73234	3.50121	4.41408	4.25247	4.05592	9.97706	8.58833	10.8303	9.79857
gi|116076868	0.886647	0.798401	1.08962	0.924888	0.392985	0.46591	0.357034	0.40531	0.211082	0.179432	0.26444	0.218318
gi|116076869	27.0845	28.0751	17.8996	24.3531	40.7779	40.7203	43.537	41.6784	58.9612	56.9112	58.2694	58.0473
gi|116076874	1.63688	1.90996	1.93908	1.82864	1.65531	1.92722	2.2328	1.93844	0.814246	0.990496	0.83918	0.881307
gi|116076875	0.114905	0.123774	0.113066	0.117248	0.126746	0.115665	0.129361	0.123924	0.138951	0.252996	0.14381	0.178586
gi|116076879	2.52145	2.31219	2.67306	2.50223	1.76006	2.28104	1.83769	1.9596	0.0637551	0.926085	0.856136	0.615325
gi|116076880	1.14238	0.810498	0.871425	0.941433	0.437834	0.628252	0.740836	0.602307	1.05347	1.56544	1.77903	1.46598
gi|116076881	1.5545	2.0248	1.77455	1.78462	0.383677	0.526196	0.598363	0.502745	2.91871	2.37479	4.41799	3.23716
gi|116076885	113.303	167.849	113.399	131.517	68.7053	67.3376	61.7828	65.9419	179.337	297.748	189.695	222.26
gi|116076886	0.989641	1.12892	0.939502	1.01935	0.828193	0.697944	0.59167	0.705936	0.511846	0.481012	0.621125	0.537995
gi|116076887	13.5509	10.9617	17.6789	14.0638	15.6042	18.3065	12.0583	15.323	79.3189	12.439	22.3346	38.0308
gi|116076888	34.0162	21.5832	25.7979	27.1324	21.81	22.4585	20.5683	21.6123	25.0756	10.2361	8.06384	14.4585
gi|116076889	0.11051	0.0701777	0.120634	0.10044	0.0715853	0.0707581	0.0933485	0.078564	0	0.0498714	0	0.0166238
gi|116076890	0.59151	0.787518	1.15531	0.844779	1.28523	1.4742	1.95247	1.57063	1.31545	0.86937	0.899864	1.02823
gi|116076891	0.069935	0.105041	0.0617506	0.0789089	0.589653	0.543529	0.335296	0.489493	0	0.0345981	0.086804	0.0404674
gi|116076892	0.606838	0.748191	0.702328	0.685786	0.535642	0.686236	0.511703	0.57786	-	-	-	-
gi|116076897	1.47297	2.40558	1.76576	1.88143	2.87555	4.44598	4.05816	3.79323	7.3831	6.08884	3.88412	5.78535
gi|116076898	0.799871	1.01068	1.07859	0.963046	3.31942	2.96083	3.83293	3.37106	1.5712	1.52407	1.81566	1.63698
gi|116076899	0.654256	0.510654	0.589779	0.584896	1.02807	0.972866	1.11061	1.03718	0.731133	0.487546	0.946312	0.721664
gi|116076900	3.01832	3.92666	3.22135	3.38878	2.47267	2.99405	3.24129	2.90267	1.80548	1.58058	2.41133	1.93246
gi|116076901	13.8396	16.1457	16.6757	15.5537	12.618	15.3001	21.1088	16.3423	7.31369	12.2774	11.5358	10.3756
gi|116076902	0.105748	0.109581	0.108008	0.107779	0.0357358	0.0583917	0.0356966	0.0432747	0	0	0.00883928	0.00294643
gi|116076906	1.45873	1.7532	1.64352	1.61848	4.70339	5.79346	6.33454	5.61046	4.31381	3.71544	3.34749	3.79225
gi|116076907	1.04522	0.960773	0.687321	0.897771	0.612179	0.531722	0.444339	0.529413	0.452797	0.485532	0.351419	0.429916
gi|116076908	1.95263	1.01169	0.685234	1.21652	1.59657	1.39957	1.63396	1.54337	2.48456	1.49669	1.84802	1.94309
gi|116076909	0.683874	0.702435	0.693831	0.69338	0.368212	0.462029	0.706933	0.512392	0.472825	0.430594	0.278467	0.393962
gi|116076910	6.39769	5.13185	3.93361	5.15438	2.03175	2.074	1.93912	2.01496	5.64508	4.4469	4.38388	4.82529
gi|116076911	3.20918	3.95738	2.62357	3.26338	5.11103	7.28564	7.77253	6.72307	12.5704	11.485	7.88845	10.648
gi|116076912	29.4964	31.3944	19.835	26.9086	54.9765	47.5547	69.0899	57.207	71.9781	72.2727	51.1321	65.1276
gi|116076914	5.26886	5.42289	4.37904	5.0236	8.68723	9.38464	9.06682	9.04623	3.38515	3.50367	3.29283	3.39388
gi|116076915	0.130075	0.153115	0.104375	0.129189	1.13892	0.795034	1.32266	1.08554	0.108494	0.0907231	0.119357	0.106191
gi|116076916	3.96455	1.26067	11.4383	5.5545	-	-	-	-	-	-	-	-
gi|116076918	16.3683	18.6212	14.3328	16.4408	9.0864	9.44417	9.35353	9.2947	13.9157	15.4912	10.1239	13.1769
gi|116076919	5.86417	6.00901	5.81729	5.89682	4.86242	4.80743	6.22244	5.29743	11.954	8.30269	7.1854	9.14736
gi|116076920	0.38884	0.598471	0.464444	0.483919	0.334569	0.47627	1.42419	0.745011	0.830422	0.635382	0.368186	0.61133
gi|116076921	0.0109333	0.0102607	0.0107913	0.0106618	0.0533396	0.102523	0.122913	0.0929252	0.04053	0.03978	0.0313585	0.0372228
gi|116076924	8.48476	9.34201	5.80834	7.87837	12.1636	13.8125	22.4867	16.1543	32.7593	26.1699	23.16	27.3631
gi|116076925	0.229914	0.597054	0.375334	0.400767	0.861195	1.59313	1.81262	1.42231	0.158608	0	0	0.0528694
gi|116076929	0.0339697	0.0327631	0.0362762	0.0343363	0.143597	0.125226	0.221357	0.163393	0.0999059	0.0723089	0.0800117	0.0840755
gi|116076933	0.910628	1.30121	0.915551	1.04246	-	-	-	-	0.0679666	0.0638688	0.0745409	0.0687921
gi|116076935	0.0835175	0.039833	0.0887277	0.0706927	0.202883	0.146607	0.273034	0.207508	0	0	0.175678	0.0585593
gi|116076936	1.45833	1.6417	1.11143	1.40382	1.05602	0.977043	1.46924	1.16744	0.226351	0.264902	0.232742	0.241332
gi|116076938	0.189078	0.24942	0.200522	0.213007	0.326894	0.388916	0.182203	0.299338	0.0911593	0.0612345	0.108789	0.087061
gi|116076939	15.9401	14.5397	11.6957	14.0585	12.2127	14.4585	20.6064	15.7592	43.8915	33.267	26.9566	34.705
gi|116076943	7.3228	10.1265	8.23474	8.56136	0.441627	0.319638	0.388728	0.383331	3.23793	3.37242	3.10699	3.23911
gi|116076944	4.99642	4.38903	4.64687	4.67744	2.3985	3.33892	2.39005	2.70916	5.4305	3.07619	4.53129	4.34599
gi|116076948	1.20122	1.40431	1.37936	1.3283	3.21029	2.71495	3.45042	3.12522	1.74154	2.52996	2.95404	2.40851
gi|116076950	0.853321	0.989877	1.22676	1.02332	0.802807	0.792962	0.863471	0.819747	0.683019	0.363951	0.286231	0.4444
gi|116076951	0.197953	0.206904	0.174981	0.193279	0.646873	0.404901	0.500187	0.51732	0.530151	0.385795	0.506948	0.474298
gi|116076952	3.9862	2.40705	3.21091	3.20139	2.1812	2.79786	2.93114	2.63674	0.116087	0.659194	0.449193	0.408158
gi|116076953	5.97839	4.48514	6.76837	5.74397	9.78495	7.26427	13.0166	10.0219	12.1681	10.6596	7.92586	10.2512
gi|116076955	0.0433899	0.0405264	0.0673209	0.0504124	-	-	-	-	-	-	-	-
gi|116076957	0.033055	0.0313631	0.0929414	0.0524532	0.216381	0.272366	0.335122	0.274623	0.374678	0.302433	0.362973	0.346694
gi|116076960	0.113639	0.129357	0.118448	0.120481	0.0569957	0.079454	0.112627	0.0830256	0.0868596	0.108476	0.103683	0.0996729
gi|116076961	8.63557	10.6762	12.2746	10.5288	9.12813	9.59612	10.3893	9.70452	17.0443	19.6482	12.6771	16.4565
gi|116076962	1.80479	2.07192	2.50968	2.1288	1.08573	1.97175	1.80766	1.62171	3.28781	4.06493	2.71431	3.35568
gi|116076963	0.0744889	0.0799261	0.0748342	0.0764164	0.795541	1.02588	0.652308	0.824578	0.0960238	0.159339	0.146137	0.133833
gi|116076965	60.4514	71.3064	77.5572	69.7717	3.25815	3.51126	3.66953	3.47965	18.4836	14.0455	10.2313	14.2534
gi|116076966	0.0477105	0.0566837	0.0498199	0.0514047	0.134954	0.0987107	0.111914	0.115193	0.0547215	0	0.10653	0.0537505
gi|116076968	0.587505	1.28759	0.260454	0.711851	0.0346386	0.0210492	0.0310928	0.0289269	0.0941298	0.356033	0.299247	0.249803
gi|116076969	2.98776	2.85519	1.95886	2.6006	4.17613	6.60023	5.27669	5.35102	17.5072	13.1705	10.9868	13.8881
gi|116076970	0.178709	0.127899	0.135372	0.147327	0.195086	0.232248	0.307518	0.244951	0	0.0714721	0.0804003	0.0506242
gi|116076971	0.0335944	0.0339955	0.0749634	0.0475178	0	0	0.0468424	0.0156141	-	-	-	-
gi|116076972	0.0531583	0.0593511	0.0704514	0.060987	0.187573	0.178717	0.158107	0.174799	0.0896771	0.0639101	0.0692644	0.0742839
gi|116076973	3.01689	3.66007	6.05332	4.24342	1.09232	0.909324	0.947005	0.982884	5.3708	8.84143	5.76572	6.65931
gi|116076974	0.352503	0.298932	0.370797	0.340744	1.11765	1.17089	0.934674	1.07441	0.258897	0.129334	0.207939	0.198723
gi|116076975	0.233143	0.341631	0.412254	0.329009	0.226013	0.221187	0.226582	0.224594	1.21346	0.824845	0.0275197	0.688608
gi|116076976	107.948	26.2859	98.3577	77.5306	0.0761285	0.103062	0.0926657	0.0906187	0.201353	0.226451	0.0946409	0.174148
gi|116076979	5.85033	8.2219	7.59621	7.22281	0.78562	0.937477	0.792574	0.838557	0.752956	0.886519	0.769362	0.802945
gi|116076985	5.87209	2.62287	3.01722	3.83739	1.58735	0.938267	1.28879	1.27147	11.8669	6.88326	10.0457	9.59863
gi|116076986	1.11078	1.00496	0.97036	1.0287	2.07088	2.2493	2.80592	2.37537	3.3311	3.24215	2.42056	2.99794
gi|116076987	0.4236	0.56218	0.422982	0.469588	0.44046	0.381845	0.427829	0.416711	0.281431	0.306756	0.259484	0.282557
gi|116076988	0.129927	0.161907	0.187716	0.15985	0.229165	0.322056	0.611068	0.387429	0.347838	0.171446	0.177223	0.232169
gi|116076992	0.129111	0.111226	0.114239	0.118192	0.19717	0.239007	0.293647	0.243275	0.113423	0.0524742	0.0722476	0.0793815
gi|116076993	0.511607	0.530951	0.541131	0.527897	0.213195	0.330077	0.200411	0.247894	0.494153	0.466364	0.462987	0.474501
gi|116076994	0.172528	0.419482	0.896519	0.496176	0.13786	0.0885315	0.489112	0.238501	0.0671902	0.24687	0.0547177	0.122926
gi|116076997	8.39329	7.43585	6.2337	7.35428	12.0574	11.2909	8.91463	10.7543	4.90418	5.56921	3.9552	4.80953
gi|116076998	4.01325	3.24776	3.43566	3.56556	4.38446	4.23286	4.24432	4.28721	1.25916	3.03533	2.87528	2.38992
gi|116076999	0.0669188	0.0953434	0.102293	0.0881852	0.223428	0.289334	0.382172	0.298311	0.216134	0.323889	0.185657	0.241894
gi|116077001	0.334243	0.236058	0	0.1901	0.0852791	0.08642	0	0.057233	0	0	0.114313	0.0381045
gi|116077003	1.11854	0.806347	1.38995	1.10495	0.433632	0.470087	0.391038	0.431586	0.750662	0.834814	0	0.528492
gi|116077004	0.250884	0.134185	0.140227	0.175099	0.0291792	0.0315701	0	0.0202498	0.793483	0.493373	0.380162	0.555673
gi|116077005	0.542906	0.976059	0.823027	0.780664	0.227834	0.273883	0.249713	0.250477	0.771543	0.741581	0.636576	0.716566
gi|116077007	0.836214	1.06281	1.08485	0.994625	1.01564	1.04453	1.0926	1.05093	0.161261	0.419308	0.378763	0.319777
gi|116077008	0.0576677	0.0784886	0.053974	0.0633768	0.0679321	0.0530801	0.0557666	0.0589262	0	0.0663171	0.0706685	0.0456619
gi|116077009	0.532176	0.552766	0.463167	0.516036	0.152082	0.0585858	0.0419982	0.084222	0.319199	0.30939	0.340569	0.323053
gi|116077011	41.0057	39.5419	44.2217	41.5898	32.5348	31.9885	34.4057	32.9763	36.4761	29.6658	32.7043	32.9487
gi|116077012	0.706272	0.761755	0.514547	0.660858	0.563217	0.455451	0.249394	0.422687	1.0287	0.795971	0.600768	0.808481
gi|116077013	30.9501	31.1323	16.7602	26.2808	11.3705	12.1697	16.5876	13.376	55.6014	34.5165	42.2782	44.1321
gi|116077014	0.433741	0.453237	0.450983	0.445987	0.486651	0.574248	0.352583	0.471161	1.38927	1.07949	0.85774	1.10883
gi|116077015	2.40649	2.35182	2.30018	2.35283	3.74719	2.4818	3.07168	3.10022	1.53685	1.87567	1.51914	1.64389
gi|116077016	3.90897	3.6006	2.68871	3.39943	4.41919	4.52886	3.41033	4.11946	3.07647	2.99995	2.95603	3.01081
gi|116077017	0.116433	0.150094	0.209605	0.158711	0.166981	0.217448	0.250521	0.21165	0.334574	0.348301	0.292605	0.32516
gi|116077018	985.092	945.336	954.309	961.579	865.688	844.894	1088.73	933.105	2386.92	1336.42	1446.94	1723.43
gi|116077019	4.01211	4.029	3.64869	3.8966	2.77529	3.27394	5.11363	3.72095	6.919	7.97727	5.45477	6.78368
gi|116077020	0.472897	0.655413	0.388154	0.505488	0.309241	0.562802	0.496518	0.456187	0.948356	0.733213	0.707657	0.796409
gi|116077021	0	0.0578074	0	0.0192691	-	-	-	-	-	-	-	-
gi|116077022	3.58249	3.59609	4.28711	3.8219	6.20846	6.74461	6.3889	6.44732	4.81389	3.85201	3.60888	4.0916
gi|116077023	10.6831	13.1427	12.3829	12.0696	3.56541	3.70564	4.65876	3.9766	1.94236	3.8921	3.45098	3.09514
gi|116077024	0.0783901	0.125024	0.0641755	0.0891965	-	-	-	-	0	0.0477577	0.0297624	0.0258401
gi|116077025	7.37571	6.24589	8.38828	7.33663	4.88781	6.36047	6.75205	6.00011	2.93606	4.52221	5.51744	4.32524
gi|116077026	1.34406	1.56643	1.58866	1.49972	0.451898	0.681796	0.324245	0.48598	2.52126	2.83177	1.89525	2.41609
gi|116077030	1.23761	1.69393	1.23302	1.38819	5.70628	9.56323	13.0547	9.44139	4.03959	3.06565	2.59431	3.23318
gi|116077031	0.0970061	0.119623	0.236846	0.151158	0.151481	0.129979	0.119414	0.133625	0.1927	0.110413	0.207759	0.170291
gi|116077032	0	0.0179187	0	0.0059729	0.0974147	0.140125	0.14797	0.128503	0.0710899	0.073311	0.0702993	0.0715667
gi|116077034	4.83063	4.37556	6.69482	5.30034	5.20148	3.69676	8.00829	5.63551	12.3163	9.54287	8.316	10.0584
gi|116077035	0.25348	0.241884	0.305856	0.267073	0.426571	0.358855	0.533818	0.439748	0.20677	0.165909	0.163954	0.178878
gi|116077038	8.35175	8.7903	7.67323	8.27176	6.47107	4.98372	3.94096	5.13192	0.58873	1.93208	1.72806	1.41629
gi|116077042	1.90828	2.22179	1.82827	1.98611	2.01733	2.31107	2.24663	2.19168	0.925534	0.262144	0.305364	0.49768
gi|116077043	1.16804	1.34413	1.25539	1.25585	2.99437	2.48416	3.74631	3.07495	2.28357	1.26415	1.29584	1.61452
gi|116077045	0.0405048	0.0700511	0	0.036852	-	-	-	-	0	0.0498502	0	0.0166167
gi|116077046	0.333412	0.403816	0.282084	0.339771	0.849173	0.672422	0.72769	0.749762	0.391171	0.47202	0.468472	0.443888
gi|116077047	0.471824	0.478509	0.434242	0.461525	0.444545	0.320536	0.281798	0.34896	0.365978	0.520661	0.410946	0.432529
gi|116077050	10.8908	11.2046	13.2629	11.7861	14.3346	13.4458	14.1519	13.9774	5.80589	7.70403	6.57711	6.69568
gi|116077051	0.164983	0.1823	0.178812	0.175365	0.734878	0.657852	0.749091	0.71394	0	0.0177169	0	0.00590565
gi|116077053	0.130886	0.15186	0	0.0942486	0.127606	0.13259	0.0987227	0.11964	0.128228	0.141105	0.120455	0.129929
gi|116077059	0.552696	0.688718	0.0908693	0.444094	0.180832	0.249637	0.248021	0.226163	0	0.0113285	0.0109848	0.00743778
gi|116077061	0.361957	0.312613	0.26582	0.313464	0.138257	0.236432	0.261956	0.212215	0.527622	0.509241	0.487708	0.50819
gi|116077062	0.0656432	0.113858	0.0862829	0.0885948	0.297248	0.233613	0.256273	0.262378	0.097506	0.0808316	0.13624	0.104859
gi|116077063	3.24354	3.69697	3.52277	3.48776	6.61667	5.15902	4.88161	5.55243	2.18199	1.86627	1.83316	1.96047
[truncated: 547 more rows]

## Sheet: S5_Input_SAM_WT_dphpP
#	Identifier	Median_normalised_LFQ intensity WT_BR1	Median_normalised_LFQ intensity WT_BR2	Median_normalised_LFQ intensity WT_BR3	Median_normalised_LFQ intensity ΔphpP_BR1	Median_normalised_LFQ intensity ΔphpP_BR2	Median_normalised_LFQ intensity ΔphpP_BR3
[truncated: 977 more rows]

[truncated: 3 more sheets: S6_Fold changes_WT_dphpP, S7_Input_SAM_WT_dstkP, S8_Fold changes_WT_dstkP]
