# Supplementary material for: Proteomic Investigation Uncovers Potential Targets and Target Sites of Pneumococcal Serine-Threonine Kinase StkP and Phosphatase PhpP
Source: Front Microbiol. 2020 Feb 4;10:3101. doi: 10.3389/fmicb.2019.03101 (PMC7011611; doi:10.3389/fmicb.2019.03101)
Supplement: Supplementary file 3 [file Data_Sheet_3.xlsx]

## Sheet: Data Sheet S3_Information
Data Sheet S3: Overview of data sets and raw files
Supplementary File S1: Overview_Data_sets
	Overview of all datasets used for spectral library generation
	Dataset	Dataset number
	Samples	Sample preparation type
	LC gradient lenght [min]
	S. pneumoniae strain D39Δcps	Strain samples derived from
	Sample type
	Dataset	Data generated/measured by: CHi - Claudia Hirschfeld, CH - Christian Hentschker, JHo - Juliane Hoyer
	Cultivation medium
	Growth phase	Cell harvest
	Comments/treatments
	Additional information
	Number of raw.files
Supplementary File S2: All_.raw files
	Detailed list of all .raw files used in this study
	Dataset
	File name
	MS instrument
	Strain
	Cultivation medium
	Growth phase
	Biological replicate
	Technical replicate
	Sample type
	Fractions
	Comments - Sample preparation/Treatment
	Additional information

## Sheet: S1_Overview_Data_sets
Dataset	Samples	LC gradient lenght [min]	S. pneumoniae strain D39Δcps	Sample type	Dataset	Cultivation medium	Growth phase	Comments/treatments	Additional information	Number of raw.files
001	1D_GeLC-MS/MS	100	WT, ΔphpP, ΔstkP	whole cell extract	CHi	RPMI modi	exponential	-	-	90
002	1D_GeLC-MS/MS	100	WT, ΔphpP, ΔstkP	whole cell extract	CHi	RPMI modi	stationary	-	-	90
003	1D_GeLC-MS/MS	100	WT, ΔphpP, ΔstkP	whole cell extract	CHi	THY	exponential	-	-	90
004	1D_GeLC-MS/MS	100	WT, ΔphpP, ΔstkP	whole cell extract	CHi	THY	stationary	-	-	90
005	1D_GeLC-MS/MS	100	WT	whole cell extract	JHo	RPMI modi	early stationary	-	-	10
006	In solution digested	180	WT	whole cell extract	JHo	RPMI modi	early stationary	-	internal SILAC standard - Lys C13N15, Arg C13N15	27
007	In solution digested	180	WT	whole cell extract	JHo	RPMI modi	early stationary	bipyridine (BIP) stress induced	internal SILAC standard - Lys C13N15, Arg C13N15	12
008	In solution digested	180	WT	whole cell extract	JHo	RPMI modi	early stationary	BIP-iron(II)-complex treatment	internal SILAC standard - Lys C13N15, Arg C13N15	9
009	In solution digested	180	WT	supernatant from cell culture	JHo	RPMI modi	early stationary	-	internal SILAC standard - Lys C13N15, Arg C13N15	24
010	In solution digested	180	WT	supernatant from cell culture	JHo	RPMI modi	early stationary	bipyridine (BIP) stress induced	internal SILAC standard - Lys C13N15, Arg C13N15	15
011	In solution digested	180	WT	supernatant from cell culture	JHo	RPMI modi	early stationary	BIP-iron(II)-complex treatment	internal SILAC standard - Lys C13N15, Arg C13N15	10
012	In solution digested	180	WT	whole cell extract	JHo	THY	early stationary	-	internal SILAC standard - Lys C13N15, Arg C13N15 for 9 samples	21
013	In solution digested	180	WT	whole cell extract	JHo	THY	early stationary	bipyridine (BIP) stress induced	-	15
014	In solution digested	180	WT	whole cell extract	JHo	THY	early stationary	BIP-iron(II)-complex treatment	-	9
015	In solution digested	180	WT	supernatant from cell culture	JHo	THY	early stationary	-	-	3
016	In solution digested	180	WT	supernatant from cell culture	JHo	THY	early stationary	bipyridine (BIP) stress induced	-	3
017	In solution digested	180	WT	supernatant from cell culture	JHo	THY	early stationary	BIP-iron(II)-complex treatment	-	3
018	In solution digested	180	WT	whole cell extract	JHo	RPMI modi	stationary	-	-	5
019	In solution digested	180	WT	supernatant from cell culture	JHo	RPMI modi	stationary	-	-	5
020	In solution digested	180	WT	whole cell extract	JHo	RPMI modi	stationary	glucose addition	-	1
021	In solution digested	180	WT	supernatant from cell culture	JHo	RPMI modi	stationary	glucose addition	-	3
022	In solution digested	180	WT	whole cell extract	JHo	RPMI modi	stationary	glucose limitation	-	1
023	In solution digested	180	WT	supernatant from cell culture	JHo	RPMI modi	stationary	glucose limitation	-	3
024	Phospho-peptides enriched, in solution digested	100	WT, ΔphpP, ΔstkP	whole cell extract	CHi	RPMI modi	exponential	TiO enrichment of phospho-peptides	SCX free workflow, internal SILAC standard - Lys C13N15, Arg C13N15	81
025	Phospho-peptides enriched, in solution digested	100	WT	whole cell extract	CH	CDM	exponential	TiO enrichment of phospho-peptides	Classical workflow including SCX pre-fractionation	185
026	Phospho-peptides enriched, in solution digested	100	WT	whole cell extract	CH	CDM	transient	TiO enrichment of phospho-peptides	Classical workflow including SCX pre-fractionation	47
027	Phospho-peptides enriched, in solution digested	100	WT	whole cell extract	CH	THY	exponential	TiO enrichment of phospho-peptides	Classical workflow including SCX pre-fractionation	56
									Sum of ".raw" files used for library generation: 908

## Sheet: S2_All_.raw files
Dataset	File name	MS instrument	Strain	Cultivation medium	Growth phase	Biological replicate	Technical replicate	Sample type	Fractions	Comments - Sample preparation/Treatment	Additional information
001	170106_V2_PM3_CHi_D39_WT_logBR1_1.raw	LTQ Orbitrap Velos (V2)	WT	RPMI modified	exponential	1	1	whole cell extract	1	1D-Gel separation	-
001	170106_V2_PM3_CHi_D39_WT_logBR1_2.raw	LTQ Orbitrap Velos (V2)	WT	RPMI modified	exponential	1	1	whole cell extract	2	1D-Gel separation	-
001	170106_V2_PM3_CHi_D39_WT_logBR1_3.raw	LTQ Orbitrap Velos (V2)	WT	RPMI modified	exponential	1	1	whole cell extract	3	1D-Gel separation	-
001	170106_V2_PM3_CHi_D39_WT_logBR1_4.raw	LTQ Orbitrap Velos (V2)	WT	RPMI modified	exponential	1	1	whole cell extract	4	1D-Gel separation	-
001	170106_V2_PM3_CHi_D39_WT_logBR1_5.raw	LTQ Orbitrap Velos (V2)	WT	RPMI modified	exponential	1	1	whole cell extract	5	1D-Gel separation	-
001	170106_V2_PM3_CHi_D39_WT_logBR1_6.raw	LTQ Orbitrap Velos (V2)	WT	RPMI modified	exponential	1	1	whole cell extract	6	1D-Gel separation	-
001	170106_V2_PM3_CHi_D39_WT_logBR1_7.raw	LTQ Orbitrap Velos (V2)	WT	RPMI modified	exponential	1	1	whole cell extract	7	1D-Gel separation	-
001	170106_V2_PM3_CHi_D39_WT_logBR1_8.raw	LTQ Orbitrap Velos (V2)	WT	RPMI modified	exponential	1	1	whole cell extract	8	1D-Gel separation	-
001	170106_V2_PM3_CHi_D39_WT_logBR1_9.raw	LTQ Orbitrap Velos (V2)	WT	RPMI modified	exponential	1	1	whole cell extract	9	1D-Gel separation	-
001	170106_V2_PM3_CHi_D39_WT_logBR1_10.raw	LTQ Orbitrap Velos (V2)	WT	RPMI modified	exponential	1	1	whole cell extract	10	1D-Gel separation	-
001	170107_V2_PM3_CHi_D39_WT_logBR2_1.raw	LTQ Orbitrap Velos (V2)	WT	RPMI modified	exponential	2	1	whole cell extract	1	1D-Gel separation	-
001	170107_V2_PM3_CHi_D39_WT_logBR2_2.raw	LTQ Orbitrap Velos (V2)	WT	RPMI modified	exponential	2	1	whole cell extract	2	1D-Gel separation	-
001	170107_V2_PM3_CHi_D39_WT_logBR2_3.raw	LTQ Orbitrap Velos (V2)	WT	RPMI modified	exponential	2	1	whole cell extract	3	1D-Gel separation	-
001	170107_V2_PM3_CHi_D39_WT_logBR2_4.raw	LTQ Orbitrap Velos (V2)	WT	RPMI modified	exponential	2	1	whole cell extract	4	1D-Gel separation	-
001	170107_V2_PM3_CHi_D39_WT_logBR2_5.raw	LTQ Orbitrap Velos (V2)	WT	RPMI modified	exponential	2	1	whole cell extract	5	1D-Gel separation	-
001	170107_V2_PM3_CHi_D39_WT_logBR2_6.raw	LTQ Orbitrap Velos (V2)	WT	RPMI modified	exponential	2	1	whole cell extract	6	1D-Gel separation	-
001	170107_V2_PM3_CHi_D39_WT_logBR2_7.raw	LTQ Orbitrap Velos (V2)	WT	RPMI modified	exponential	2	1	whole cell extract	7	1D-Gel separation	-
001	170107_V2_PM3_CHi_D39_WT_logBR2_8.raw	LTQ Orbitrap Velos (V2)	WT	RPMI modified	exponential	2	1	whole cell extract	8	1D-Gel separation	-
001	170107_V2_PM3_CHi_D39_WT_logBR2_9.raw	LTQ Orbitrap Velos (V2)	WT	RPMI modified	exponential	2	1	whole cell extract	9	1D-Gel separation	-
001	170107_V2_PM3_CHi_D39_WT_logBR2_10.raw	LTQ Orbitrap Velos (V2)	WT	RPMI modified	exponential	2	1	whole cell extract	10	1D-Gel separation	-
001	170108_V2_PM3_CHi_D39_WT_logBR3_1.raw	LTQ Orbitrap Velos (V2)	WT	RPMI modified	exponential	3	1	whole cell extract	1	1D-Gel separation	-
001	170108_V2_PM3_CHi_D39_WT_logBR3_2.raw	LTQ Orbitrap Velos (V2)	WT	RPMI modified	exponential	3	1	whole cell extract	2	1D-Gel separation	-
001	170108_V2_PM3_CHi_D39_WT_logBR3_3.raw	LTQ Orbitrap Velos (V2)	WT	RPMI modified	exponential	3	1	whole cell extract	3	1D-Gel separation	-
001	170108_V2_PM3_CHi_D39_WT_logBR3_4.raw	LTQ Orbitrap Velos (V2)	WT	RPMI modified	exponential	3	1	whole cell extract	4	1D-Gel separation	-
001	170108_V2_PM3_CHi_D39_WT_logBR3_5.raw	LTQ Orbitrap Velos (V2)	WT	RPMI modified	exponential	3	1	whole cell extract	5	1D-Gel separation	-
001	170108_V2_PM3_CHi_D39_WT_logBR3_6.raw	LTQ Orbitrap Velos (V2)	WT	RPMI modified	exponential	3	1	whole cell extract	6	1D-Gel separation	-
001	170108_V2_PM3_CHi_D39_WT_logBR3_7.raw	LTQ Orbitrap Velos (V2)	WT	RPMI modified	exponential	3	1	whole cell extract	7	1D-Gel separation	-
001	170108_V2_PM3_CHi_D39_WT_logBR3_8.raw	LTQ Orbitrap Velos (V2)	WT	RPMI modified	exponential	3	1	whole cell extract	8	1D-Gel separation	-
001	170108_V2_PM3_CHi_D39_WT_logBR3_9.raw	LTQ Orbitrap Velos (V2)	WT	RPMI modified	exponential	3	1	whole cell extract	9	1D-Gel separation	-
001	170108_V2_PM3_CHi_D39_WT_logBR3_10.raw	LTQ Orbitrap Velos (V2)	WT	RPMI modified	exponential	3	1	whole cell extract	10	1D-Gel separation	-
001	170113_V2_PM3_CHi_D39_dstkP_logBR1_1.raw	LTQ Orbitrap Velos (V2)	ΔstkP	RPMI modified	exponential	1	1	whole cell extract	1	1D-Gel separation	-
001	170113_V2_PM3_CHi_D39_dstkP_logBR1_2.raw	LTQ Orbitrap Velos (V2)	ΔstkP	RPMI modified	exponential	1	1	whole cell extract	2	1D-Gel separation	-
001	170113_V2_PM3_CHi_D39_dstkP_logBR1_3.raw	LTQ Orbitrap Velos (V2)	ΔstkP	RPMI modified	exponential	1	1	whole cell extract	3	1D-Gel separation	-
001	170113_V2_PM3_CHi_D39_dstkP_logBR1_4.raw	LTQ Orbitrap Velos (V2)	ΔstkP	RPMI modified	exponential	1	1	whole cell extract	4	1D-Gel separation	-
001	170113_V2_PM3_CHi_D39_dstkP_logBR1_5.raw	LTQ Orbitrap Velos (V2)	ΔstkP	RPMI modified	exponential	1	1	whole cell extract	5	1D-Gel separation	-
001	170113_V2_PM3_CHi_D39_dstkP_logBR1_6.raw	LTQ Orbitrap Velos (V2)	ΔstkP	RPMI modified	exponential	1	1	whole cell extract	6	1D-Gel separation	-
001	170113_V2_PM3_CHi_D39_dstkP_logBR1_7.raw	LTQ Orbitrap Velos (V2)	ΔstkP	RPMI modified	exponential	1	1	whole cell extract	7	1D-Gel separation	-
001	170113_V2_PM3_CHi_D39_dstkP_logBR1_8.raw	LTQ Orbitrap Velos (V2)	ΔstkP	RPMI modified	exponential	1	1	whole cell extract	8	1D-Gel separation	-
001	170113_V2_PM3_CHi_D39_dstkP_logBR1_9.raw	LTQ Orbitrap Velos (V2)	ΔstkP	RPMI modified	exponential	1	1	whole cell extract	9	1D-Gel separation	-
001	170113_V2_PM3_CHi_D39_dstkP_logBR1_10.raw	LTQ Orbitrap Velos (V2)	ΔstkP	RPMI modified	exponential	1	1	whole cell extract	10	1D-Gel separation	-
001	170114_V2_PM3_CHi_D39_dstkP_logBR2_1.raw	LTQ Orbitrap Velos (V2)	ΔstkP	RPMI modified	exponential	2	1	whole cell extract	1	1D-Gel separation	-
001	170114_V2_PM3_CHi_D39_dstkP_logBR2_2.raw	LTQ Orbitrap Velos (V2)	ΔstkP	RPMI modified	exponential	2	1	whole cell extract	2	1D-Gel separation	-
001	170114_V2_PM3_CHi_D39_dstkP_logBR2_3.raw	LTQ Orbitrap Velos (V2)	ΔstkP	RPMI modified	exponential	2	1	whole cell extract	3	1D-Gel separation	-
001	170114_V2_PM3_CHi_D39_dstkP_logBR2_4.raw	LTQ Orbitrap Velos (V2)	ΔstkP	RPMI modified	exponential	2	1	whole cell extract	4	1D-Gel separation	-
001	170114_V2_PM3_CHi_D39_dstkP_logBR2_5.raw	LTQ Orbitrap Velos (V2)	ΔstkP	RPMI modified	exponential	2	1	whole cell extract	5	1D-Gel separation	-
001	170114_V2_PM3_CHi_D39_dstkP_logBR2_6.raw	LTQ Orbitrap Velos (V2)	ΔstkP	RPMI modified	exponential	2	1	whole cell extract	6	1D-Gel separation	-
001	170114_V2_PM3_CHi_D39_dstkP_logBR2_7.raw	LTQ Orbitrap Velos (V2)	ΔstkP	RPMI modified	exponential	2	1	whole cell extract	7	1D-Gel separation	-
001	170114_V2_PM3_CHi_D39_dstkP_logBR2_8.raw	LTQ Orbitrap Velos (V2)	ΔstkP	RPMI modified	exponential	2	1	whole cell extract	8	1D-Gel separation	-
001	170114_V2_PM3_CHi_D39_dstkP_logBR2_9.raw	LTQ Orbitrap Velos (V2)	ΔstkP	RPMI modified	exponential	2	1	whole cell extract	9	1D-Gel separation	-
001	170114_V2_PM3_CHi_D39_dstkP_logBR2_10.raw	LTQ Orbitrap Velos (V2)	ΔstkP	RPMI modified	exponential	2	1	whole cell extract	10	1D-Gel separation	-
001	170115_V2_PM3_CHi_D39_dstkP_logBR3_1.raw	LTQ Orbitrap Velos (V2)	ΔstkP	RPMI modified	exponential	3	1	whole cell extract	1	1D-Gel separation	-
001	170115_V2_PM3_CHi_D39_dstkP_logBR3_2.raw	LTQ Orbitrap Velos (V2)	ΔstkP	RPMI modified	exponential	3	1	whole cell extract	2	1D-Gel separation	-
001	170115_V2_PM3_CHi_D39_dstkP_logBR3_3.raw	LTQ Orbitrap Velos (V2)	ΔstkP	RPMI modified	exponential	3	1	whole cell extract	3	1D-Gel separation	-
001	170115_V2_PM3_CHi_D39_dstkP_logBR3_4.raw	LTQ Orbitrap Velos (V2)	ΔstkP	RPMI modified	exponential	3	1	whole cell extract	4	1D-Gel separation	-
001	170115_V2_PM3_CHi_D39_dstkP_logBR3_5.raw	LTQ Orbitrap Velos (V2)	ΔstkP	RPMI modified	exponential	3	1	whole cell extract	5	1D-Gel separation	-
001	170115_V2_PM3_CHi_D39_dstkP_logBR3_6.raw	LTQ Orbitrap Velos (V2)	ΔstkP	RPMI modified	exponential	3	1	whole cell extract	6	1D-Gel separation	-
001	170115_V2_PM3_CHi_D39_dstkP_logBR3_7.raw	LTQ Orbitrap Velos (V2)	ΔstkP	RPMI modified	exponential	3	1	whole cell extract	7	1D-Gel separation	-
001	170115_V2_PM3_CHi_D39_dstkP_logBR3_8.raw	LTQ Orbitrap Velos (V2)	ΔstkP	RPMI modified	exponential	3	1	whole cell extract	8	1D-Gel separation	-
001	170115_V2_PM3_CHi_D39_dstkP_logBR3_9.raw	LTQ Orbitrap Velos (V2)	ΔstkP	RPMI modified	exponential	3	1	whole cell extract	9	1D-Gel separation	-
001	170115_V2_PM3_CHi_D39_dstkP_logBR3_9.raw	LTQ Orbitrap Velos (V2)	ΔstkP	RPMI modified	exponential	3	1	whole cell extract	10	1D-Gel separation	-
001	170117_V2_PM3_CHi_D39_dphpP_logBR1_1.raw	LTQ Orbitrap Velos (V2)	ΔphpP	RPMI modified	exponential	1	1	whole cell extract	1	1D-Gel separation	-
001	170117_V2_PM3_CHi_D39_dphpP_logBR1_2.raw	LTQ Orbitrap Velos (V2)	ΔphpP	RPMI modified	exponential	1	1	whole cell extract	2	1D-Gel separation	-
001	170117_V2_PM3_CHi_D39_dphpP_logBR1_3.raw	LTQ Orbitrap Velos (V2)	ΔphpP	RPMI modified	exponential	1	1	whole cell extract	3	1D-Gel separation	-
001	170117_V2_PM3_CHi_D39_dphpP_logBR1_4.raw	LTQ Orbitrap Velos (V2)	ΔphpP	RPMI modified	exponential	1	1	whole cell extract	4	1D-Gel separation	-
001	170117_V2_PM3_CHi_D39_dphpP_logBR1_5.raw	LTQ Orbitrap Velos (V2)	ΔphpP	RPMI modified	exponential	1	1	whole cell extract	5	1D-Gel separation	-
001	170117_V2_PM3_CHi_D39_dphpP_logBR1_6.raw	LTQ Orbitrap Velos (V2)	ΔphpP	RPMI modified	exponential	1	1	whole cell extract	6	1D-Gel separation	-
001	170117_V2_PM3_CHi_D39_dphpP_logBR1_7.raw	LTQ Orbitrap Velos (V2)	ΔphpP	RPMI modified	exponential	1	1	whole cell extract	7	1D-Gel separation	-
001	170117_V2_PM3_CHi_D39_dphpP_logBR1_8.raw	LTQ Orbitrap Velos (V2)	ΔphpP	RPMI modified	exponential	1	1	whole cell extract	8	1D-Gel separation	-
001	170117_V2_PM3_CHi_D39_dphpP_logBR1_9.raw	LTQ Orbitrap Velos (V2)	ΔphpP	RPMI modified	exponential	1	1	whole cell extract	9	1D-Gel separation	-
001	170117_V2_PM3_CHi_D39_dphpP_logBR1_10.raw	LTQ Orbitrap Velos (V2)	ΔphpP	RPMI modified	exponential	1	1	whole cell extract	10	1D-Gel separation	-
001	170118_V2_PM3_CHi_D39_dphpP_logBR2_1.raw	LTQ Orbitrap Velos (V2)	ΔphpP	RPMI modified	exponential	2	1	whole cell extract	1	1D-Gel separation	-
001	170118_V2_PM3_CHi_D39_dphpP_logBR2_2.raw	LTQ Orbitrap Velos (V2)	ΔphpP	RPMI modified	exponential	2	1	whole cell extract	2	1D-Gel separation	-
001	170118_V2_PM3_CHi_D39_dphpP_logBR2_3.raw	LTQ Orbitrap Velos (V2)	ΔphpP	RPMI modified	exponential	2	1	whole cell extract	3	1D-Gel separation	-
001	170118_V2_PM3_CHi_D39_dphpP_logBR2_4.raw	LTQ Orbitrap Velos (V2)	ΔphpP	RPMI modified	exponential	2	1	whole cell extract	4	1D-Gel separation	-
001	170118_V2_PM3_CHi_D39_dphpP_logBR2_5.raw	LTQ Orbitrap Velos (V2)	ΔphpP	RPMI modified	exponential	2	1	whole cell extract	5	1D-Gel separation	-
001	170118_V2_PM3_CHi_D39_dphpP_logBR2_6.raw	LTQ Orbitrap Velos (V2)	ΔphpP	RPMI modified	exponential	2	1	whole cell extract	6	1D-Gel separation	-
001	170118_V2_PM3_CHi_D39_dphpP_logBR2_7.raw	LTQ Orbitrap Velos (V2)	ΔphpP	RPMI modified	exponential	2	1	whole cell extract	7	1D-Gel separation	-
001	170118_V2_PM3_CHi_D39_dphpP_logBR2_8.raw	LTQ Orbitrap Velos (V2)	ΔphpP	RPMI modified	exponential	2	1	whole cell extract	8	1D-Gel separation	-
001	170118_V2_PM3_CHi_D39_dphpP_logBR2_9.raw	LTQ Orbitrap Velos (V2)	ΔphpP	RPMI modified	exponential	2	1	whole cell extract	9	1D-Gel separation	-
001	170118_V2_PM3_CHi_D39_dphpP_logBR2_10.raw	LTQ Orbitrap Velos (V2)	ΔphpP	RPMI modified	exponential	2	1	whole cell extract	10	1D-Gel separation	-
001	170124_V2_PM3_CHi_D39_dphpP_logBR3_1.raw	LTQ Orbitrap Velos (V2)	ΔphpP	RPMI modified	exponential	3	1	whole cell extract	1	1D-Gel separation	-
001	170124_V2_PM3_CHi_D39_dphpP_logBR3_2.raw	LTQ Orbitrap Velos (V2)	ΔphpP	RPMI modified	exponential	3	1	whole cell extract	2	1D-Gel separation	-
001	170124_V2_PM3_CHi_D39_dphpP_logBR3_3.raw	LTQ Orbitrap Velos (V2)	ΔphpP	RPMI modified	exponential	3	1	whole cell extract	3	1D-Gel separation	-
001	170124_V2_PM3_CHi_D39_dphpP_logBR3_4.raw	LTQ Orbitrap Velos (V2)	ΔphpP	RPMI modified	exponential	3	1	whole cell extract	4	1D-Gel separation	-
001	170124_V2_PM3_CHi_D39_dphpP_logBR3_5.raw	LTQ Orbitrap Velos (V2)	ΔphpP	RPMI modified	exponential	3	1	whole cell extract	5	1D-Gel separation	-
001	170124_V2_PM3_CHi_D39_dphpP_logBR3_6.raw	LTQ Orbitrap Velos (V2)	ΔphpP	RPMI modified	exponential	3	1	whole cell extract	6	1D-Gel separation	-
001	170124_V2_PM3_CHi_D39_dphpP_logBR3_7.raw	LTQ Orbitrap Velos (V2)	ΔphpP	RPMI modified	exponential	3	1	whole cell extract	7	1D-Gel separation	-
001	170124_V2_PM3_CHi_D39_dphpP_logBR3_8.raw	LTQ Orbitrap Velos (V2)	ΔphpP	RPMI modified	exponential	3	1	whole cell extract	8	1D-Gel separation	-
001	170124_V2_PM3_CHi_D39_dphpP_logBR3_9.raw	LTQ Orbitrap Velos (V2)	ΔphpP	RPMI modified	exponential	3	1	whole cell extract	9	1D-Gel separation	-
001	170124_V2_PM3_CHi_D39_dphpP_logBR3_10.raw	LTQ Orbitrap Velos (V2)	ΔphpP	RPMI modified	exponential	3	1	whole cell extract	10	1D-Gel separation	-
002	170201_V2_PM3_CHi_D39_WT_statBR1_1.raw	LTQ Orbitrap Velos (V2)	WT	RPMI modified	stationary	1	1	whole cell extract	1	1D-Gel separation	-
002	170201_V2_PM3_CHi_D39_WT_statBR1_2.raw	LTQ Orbitrap Velos (V2)	WT	RPMI modified	stationary	1	1	whole cell extract	2	1D-Gel separation	-
002	170201_V2_PM3_CHi_D39_WT_statBR1_3.raw	LTQ Orbitrap Velos (V2)	WT	RPMI modified	stationary	1	1	whole cell extract	3	1D-Gel separation	-
002	170201_V2_PM3_CHi_D39_WT_statBR1_4.raw	LTQ Orbitrap Velos (V2)	WT	RPMI modified	stationary	1	1	whole cell extract	4	1D-Gel separation	-
002	170201_V2_PM3_CHi_D39_WT_statBR1_5.raw	LTQ Orbitrap Velos (V2)	WT	RPMI modified	stationary	1	1	whole cell extract	5	1D-Gel separation	-
002	170201_V2_PM3_CHi_D39_WT_statBR1_6.raw	LTQ Orbitrap Velos (V2)	WT	RPMI modified	stationary	1	1	whole cell extract	6	1D-Gel separation	-
002	170201_V2_PM3_CHi_D39_WT_statBR1_7.raw	LTQ Orbitrap Velos (V2)	WT	RPMI modified	stationary	1	1	whole cell extract	7	1D-Gel separation	-
002	170201_V2_PM3_CHi_D39_WT_statBR1_8.raw	LTQ Orbitrap Velos (V2)	WT	RPMI modified	stationary	1	1	whole cell extract	8	1D-Gel separation	-
002	170201_V2_PM3_CHi_D39_WT_statBR1_9.raw	LTQ Orbitrap Velos (V2)	WT	RPMI modified	stationary	1	1	whole cell extract	9	1D-Gel separation	-
002	170201_V2_PM3_CHi_D39_WT_statBR1_10.raw	LTQ Orbitrap Velos (V2)	WT	RPMI modified	stationary	1	1	whole cell extract	10	1D-Gel separation	-
002	170203_V2_PM3_CHi_D39_WT_statBR2_1.raw	LTQ Orbitrap Velos (V2)	WT	RPMI modified	stationary	2	1	whole cell extract	1	1D-Gel separation	-
002	170203_V2_PM3_CHi_D39_WT_statBR2_2.raw	LTQ Orbitrap Velos (V2)	WT	RPMI modified	stationary	2	1	whole cell extract	2	1D-Gel separation	-
002	170203_V2_PM3_CHi_D39_WT_statBR2_3.raw	LTQ Orbitrap Velos (V2)	WT	RPMI modified	stationary	2	1	whole cell extract	3	1D-Gel separation	-
002	170203_V2_PM3_CHi_D39_WT_statBR2_4.raw	LTQ Orbitrap Velos (V2)	WT	RPMI modified	stationary	2	1	whole cell extract	4	1D-Gel separation	-
002	170203_V2_PM3_CHi_D39_WT_statBR2_5.raw	LTQ Orbitrap Velos (V2)	WT	RPMI modified	stationary	2	1	whole cell extract	5	1D-Gel separation	-
002	170203_V2_PM3_CHi_D39_WT_statBR2_6.raw	LTQ Orbitrap Velos (V2)	WT	RPMI modified	stationary	2	1	whole cell extract	6	1D-Gel separation	-
002	170203_V2_PM3_CHi_D39_WT_statBR2_7.raw	LTQ Orbitrap Velos (V2)	WT	RPMI modified	stationary	2	1	whole cell extract	7	1D-Gel separation	-
002	170203_V2_PM3_CHi_D39_WT_statBR2_8.raw	LTQ Orbitrap Velos (V2)	WT	RPMI modified	stationary	2	1	whole cell extract	8	1D-Gel separation	-
002	170203_V2_PM3_CHi_D39_WT_statBR2_9.raw	LTQ Orbitrap Velos (V2)	WT	RPMI modified	stationary	2	1	whole cell extract	9	1D-Gel separation	-
002	170203_V2_PM3_CHi_D39_WT_statBR2_10.raw	LTQ Orbitrap Velos (V2)	WT	RPMI modified	stationary	2	1	whole cell extract	10	1D-Gel separation	-
002	170204_V2_PM3_CHi_D39_WT_statBR3_1.raw	LTQ Orbitrap Velos (V2)	WT	RPMI modified	stationary	3	1	whole cell extract	1	1D-Gel separation	-
002	170204_V2_PM3_CHi_D39_WT_statBR3_2.raw	LTQ Orbitrap Velos (V2)	WT	RPMI modified	stationary	3	1	whole cell extract	2	1D-Gel separation	-
002	170204_V2_PM3_CHi_D39_WT_statBR3_3.raw	LTQ Orbitrap Velos (V2)	WT	RPMI modified	stationary	3	1	whole cell extract	3	1D-Gel separation	-
002	170204_V2_PM3_CHi_D39_WT_statBR3_4.raw	LTQ Orbitrap Velos (V2)	WT	RPMI modified	stationary	3	1	whole cell extract	4	1D-Gel separation	-
002	170204_V2_PM3_CHi_D39_WT_statBR3_5.raw	LTQ Orbitrap Velos (V2)	WT	RPMI modified	stationary	3	1	whole cell extract	5	1D-Gel separation	-
002	170204_V2_PM3_CHi_D39_WT_statBR3_6.raw	LTQ Orbitrap Velos (V2)	WT	RPMI modified	stationary	3	1	whole cell extract	6	1D-Gel separation	-
002	170204_V2_PM3_CHi_D39_WT_statBR3_7.raw	LTQ Orbitrap Velos (V2)	WT	RPMI modified	stationary	3	1	whole cell extract	7	1D-Gel separation	-
002	170204_V2_PM3_CHi_D39_WT_statBR3_8.raw	LTQ Orbitrap Velos (V2)	WT	RPMI modified	stationary	3	1	whole cell extract	8	1D-Gel separation	-
002	170204_V2_PM3_CHi_D39_WT_statBR3_9.raw	LTQ Orbitrap Velos (V2)	WT	RPMI modified	stationary	3	1	whole cell extract	9	1D-Gel separation	-
002	170204_V2_PM3_CHi_D39_WT_statBR3_10.raw	LTQ Orbitrap Velos (V2)	WT	RPMI modified	stationary	3	1	whole cell extract	10	1D-Gel separation	-
002	170130_V2_PM3_CHi_D39_dstkP_statBR1_1.raw	LTQ Orbitrap Velos (V2)	ΔstkP	RPMI modified	stationary	1	1	whole cell extract	1	1D-Gel separation	-
002	170130_V2_PM3_CHi_D39_dstkP_statBR1_2.raw	LTQ Orbitrap Velos (V2)	ΔstkP	RPMI modified	stationary	1	1	whole cell extract	2	1D-Gel separation	-
002	170130_V2_PM3_CHi_D39_dstkP_statBR1_3.raw	LTQ Orbitrap Velos (V2)	ΔstkP	RPMI modified	stationary	1	1	whole cell extract	3	1D-Gel separation	-
002	170130_V2_PM3_CHi_D39_dstkP_statBR1_4.raw	LTQ Orbitrap Velos (V2)	ΔstkP	RPMI modified	stationary	1	1	whole cell extract	4	1D-Gel separation	-
002	170130_V2_PM3_CHi_D39_dstkP_statBR1_5.raw	LTQ Orbitrap Velos (V2)	ΔstkP	RPMI modified	stationary	1	1	whole cell extract	5	1D-Gel separation	-
002	170130_V2_PM3_CHi_D39_dstkP_statBR1_6.raw	LTQ Orbitrap Velos (V2)	ΔstkP	RPMI modified	stationary	1	1	whole cell extract	6	1D-Gel separation	-
002	170130_V2_PM3_CHi_D39_dstkP_statBR1_7.raw	LTQ Orbitrap Velos (V2)	ΔstkP	RPMI modified	stationary	1	1	whole cell extract	7	1D-Gel separation	-
002	170130_V2_PM3_CHi_D39_dstkP_statBR1_8.raw	LTQ Orbitrap Velos (V2)	ΔstkP	RPMI modified	stationary	1	1	whole cell extract	8	1D-Gel separation	-
002	170130_V2_PM3_CHi_D39_dstkP_statBR1_9.raw	LTQ Orbitrap Velos (V2)	ΔstkP	RPMI modified	stationary	1	1	whole cell extract	9	1D-Gel separation	-
002	170130_V2_PM3_CHi_D39_dstkP_statBR1_10.raw	LTQ Orbitrap Velos (V2)	ΔstkP	RPMI modified	stationary	1	1	whole cell extract	10	1D-Gel separation	-
002	170131_V2_PM3_CHi_D39_dstkP_statBR2_1.raw	LTQ Orbitrap Velos (V2)	ΔstkP	RPMI modified	stationary	2	1	whole cell extract	1	1D-Gel separation	-
002	170131_V2_PM3_CHi_D39_dstkP_statBR2_2.raw	LTQ Orbitrap Velos (V2)	ΔstkP	RPMI modified	stationary	2	1	whole cell extract	2	1D-Gel separation	-
002	170131_V2_PM3_CHi_D39_dstkP_statBR2_3.raw	LTQ Orbitrap Velos (V2)	ΔstkP	RPMI modified	stationary	2	1	whole cell extract	3	1D-Gel separation	-
002	170131_V2_PM3_CHi_D39_dstkP_statBR2_4.raw	LTQ Orbitrap Velos (V2)	ΔstkP	RPMI modified	stationary	2	1	whole cell extract	4	1D-Gel separation	-
002	170131_V2_PM3_CHi_D39_dstkP_statBR2_5.raw	LTQ Orbitrap Velos (V2)	ΔstkP	RPMI modified	stationary	2	1	whole cell extract	5	1D-Gel separation	-
002	170131_V2_PM3_CHi_D39_dstkP_statBR2_6.raw	LTQ Orbitrap Velos (V2)	ΔstkP	RPMI modified	stationary	2	1	whole cell extract	6	1D-Gel separation	-
002	170131_V2_PM3_CHi_D39_dstkP_statBR2_7.raw	LTQ Orbitrap Velos (V2)	ΔstkP	RPMI modified	stationary	2	1	whole cell extract	7	1D-Gel separation	-
002	170131_V2_PM3_CHi_D39_dstkP_statBR2_8.raw	LTQ Orbitrap Velos (V2)	ΔstkP	RPMI modified	stationary	2	1	whole cell extract	8	1D-Gel separation	-
002	170131_V2_PM3_CHi_D39_dstkP_statBR2_9.raw	LTQ Orbitrap Velos (V2)	ΔstkP	RPMI modified	stationary	2	1	whole cell extract	9	1D-Gel separation	-
002	170131_V2_PM3_CHi_D39_dstkP_statBR2_10.raw	LTQ Orbitrap Velos (V2)	ΔstkP	RPMI modified	stationary	2	1	whole cell extract	10	1D-Gel separation	-
002	170201_V2_PM3_CHi_D39_dstkP_statBR3_1.raw	LTQ Orbitrap Velos (V2)	ΔstkP	RPMI modified	stationary	3	1	whole cell extract	1	1D-Gel separation	-
002	170201_V2_PM3_CHi_D39_dstkP_statBR3_2.raw	LTQ Orbitrap Velos (V2)	ΔstkP	RPMI modified	stationary	3	1	whole cell extract	2	1D-Gel separation	-
002	170201_V2_PM3_CHi_D39_dstkP_statBR3_3.raw	LTQ Orbitrap Velos (V2)	ΔstkP	RPMI modified	stationary	3	1	whole cell extract	3	1D-Gel separation	-
002	170201_V2_PM3_CHi_D39_dstkP_statBR3_4.raw	LTQ Orbitrap Velos (V2)	ΔstkP	RPMI modified	stationary	3	1	whole cell extract	4	1D-Gel separation	-
002	170201_V2_PM3_CHi_D39_dstkP_statBR3_5.raw	LTQ Orbitrap Velos (V2)	ΔstkP	RPMI modified	stationary	3	1	whole cell extract	5	1D-Gel separation	-
002	170201_V2_PM3_CHi_D39_dstkP_statBR3_6.raw	LTQ Orbitrap Velos (V2)	ΔstkP	RPMI modified	stationary	3	1	whole cell extract	6	1D-Gel separation	-
002	170201_V2_PM3_CHi_D39_dstkP_statBR3_7.raw	LTQ Orbitrap Velos (V2)	ΔstkP	RPMI modified	stationary	3	1	whole cell extract	7	1D-Gel separation	-
002	170201_V2_PM3_CHi_D39_dstkP_statBR3_8.raw	LTQ Orbitrap Velos (V2)	ΔstkP	RPMI modified	stationary	3	1	whole cell extract	8	1D-Gel separation	-
002	170201_V2_PM3_CHi_D39_dstkP_statBR3_9.raw	LTQ Orbitrap Velos (V2)	ΔstkP	RPMI modified	stationary	3	1	whole cell extract	9	1D-Gel separation	-
002	170201_V2_PM3_CHi_D39_dstkP_statBR3_10.raw	LTQ Orbitrap Velos (V2)	ΔstkP	RPMI modified	stationary	3	1	whole cell extract	10	1D-Gel separation	-
002	170125_V2_PM3_CHi_D39_dphpP_statBR1_1.raw	LTQ Orbitrap Velos (V2)	ΔphpP	RPMI modified	stationary	1	1	whole cell extract	1	1D-Gel separation	-
002	170125_V2_PM3_CHi_D39_dphpP_statBR1_2.raw	LTQ Orbitrap Velos (V2)	ΔphpP	RPMI modified	stationary	1	1	whole cell extract	2	1D-Gel separation	-
002	170125_V2_PM3_CHi_D39_dphpP_statBR1_3.raw	LTQ Orbitrap Velos (V2)	ΔphpP	RPMI modified	stationary	1	1	whole cell extract	3	1D-Gel separation	-
002	170125_V2_PM3_CHi_D39_dphpP_statBR1_4.raw	LTQ Orbitrap Velos (V2)	ΔphpP	RPMI modified	stationary	1	1	whole cell extract	4	1D-Gel separation	-
002	170125_V2_PM3_CHi_D39_dphpP_statBR1_5.raw	LTQ Orbitrap Velos (V2)	ΔphpP	RPMI modified	stationary	1	1	whole cell extract	5	1D-Gel separation	-
002	170125_V2_PM3_CHi_D39_dphpP_statBR1_6.raw	LTQ Orbitrap Velos (V2)	ΔphpP	RPMI modified	stationary	1	1	whole cell extract	6	1D-Gel separation	-
002	170125_V2_PM3_CHi_D39_dphpP_statBR1_7.raw	LTQ Orbitrap Velos (V2)	ΔphpP	RPMI modified	stationary	1	1	whole cell extract	7	1D-Gel separation	-
002	170125_V2_PM3_CHi_D39_dphpP_statBR1_8.raw	LTQ Orbitrap Velos (V2)	ΔphpP	RPMI modified	stationary	1	1	whole cell extract	8	1D-Gel separation	-
002	170125_V2_PM3_CHi_D39_dphpP_statBR1_9.raw	LTQ Orbitrap Velos (V2)	ΔphpP	RPMI modified	stationary	1	1	whole cell extract	9	1D-Gel separation	-
002	170125_V2_PM3_CHi_D39_dphpP_statBR1_10.raw	LTQ Orbitrap Velos (V2)	ΔphpP	RPMI modified	stationary	1	1	whole cell extract	10	1D-Gel separation	-
002	170126_V2_PM3_CHi_D39_dphpP_statBR2_1.raw	LTQ Orbitrap Velos (V2)	ΔphpP	RPMI modified	stationary	2	1	whole cell extract	1	1D-Gel separation	-
002	170126_V2_PM3_CHi_D39_dphpP_statBR2_2.raw	LTQ Orbitrap Velos (V2)	ΔphpP	RPMI modified	stationary	2	1	whole cell extract	2	1D-Gel separation	-
002	170126_V2_PM3_CHi_D39_dphpP_statBR2_3.raw	LTQ Orbitrap Velos (V2)	ΔphpP	RPMI modified	stationary	2	1	whole cell extract	3	1D-Gel separation	-
002	170126_V2_PM3_CHi_D39_dphpP_statBR2_4.raw	LTQ Orbitrap Velos (V2)	ΔphpP	RPMI modified	stationary	2	1	whole cell extract	4	1D-Gel separation	-
002	170126_V2_PM3_CHi_D39_dphpP_statBR2_5.raw	LTQ Orbitrap Velos (V2)	ΔphpP	RPMI modified	stationary	2	1	whole cell extract	5	1D-Gel separation	-
002	170126_V2_PM3_CHi_D39_dphpP_statBR2_6.raw	LTQ Orbitrap Velos (V2)	ΔphpP	RPMI modified	stationary	2	1	whole cell extract	6	1D-Gel separation	-
002	170126_V2_PM3_CHi_D39_dphpP_statBR2_7.raw	LTQ Orbitrap Velos (V2)	ΔphpP	RPMI modified	stationary	2	1	whole cell extract	7	1D-Gel separation	-
002	170126_V2_PM3_CHi_D39_dphpP_statBR2_8.raw	LTQ Orbitrap Velos (V2)	ΔphpP	RPMI modified	stationary	2	1	whole cell extract	8	1D-Gel separation	-
002	170126_V2_PM3_CHi_D39_dphpP_statBR2_9.raw	LTQ Orbitrap Velos (V2)	ΔphpP	RPMI modified	stationary	2	1	whole cell extract	9	1D-Gel separation	-
002	170126_V2_PM3_CHi_D39_dphpP_statBR2_10.raw	LTQ Orbitrap Velos (V2)	ΔphpP	RPMI modified	stationary	2	1	whole cell extract	10	1D-Gel separation	-
002	170127_V2_PM3_CHi_D39_dphpP_statBR3_1.raw	LTQ Orbitrap Velos (V2)	ΔphpP	RPMI modified	stationary	3	1	whole cell extract	1	1D-Gel separation	-
002	170127_V2_PM3_CHi_D39_dphpP_statBR3_2.raw	LTQ Orbitrap Velos (V2)	ΔphpP	RPMI modified	stationary	3	1	whole cell extract	2	1D-Gel separation	-
002	170127_V2_PM3_CHi_D39_dphpP_statBR3_3.raw	LTQ Orbitrap Velos (V2)	ΔphpP	RPMI modified	stationary	3	1	whole cell extract	3	1D-Gel separation	-
002	170127_V2_PM3_CHi_D39_dphpP_statBR3_4.raw	LTQ Orbitrap Velos (V2)	ΔphpP	RPMI modified	stationary	3	1	whole cell extract	4	1D-Gel separation	-
002	170127_V2_PM3_CHi_D39_dphpP_statBR3_5.raw	LTQ Orbitrap Velos (V2)	ΔphpP	RPMI modified	stationary	3	1	whole cell extract	5	1D-Gel separation	-
002	170127_V2_PM3_CHi_D39_dphpP_statBR3_6.raw	LTQ Orbitrap Velos (V2)	ΔphpP	RPMI modified	stationary	3	1	whole cell extract	6	1D-Gel separation	-
002	170127_V2_PM3_CHi_D39_dphpP_statBR3_7.raw	LTQ Orbitrap Velos (V2)	ΔphpP	RPMI modified	stationary	3	1	whole cell extract	7	1D-Gel separation	-
002	170127_V2_PM3_CHi_D39_dphpP_statBR3_8.raw	LTQ Orbitrap Velos (V2)	ΔphpP	RPMI modified	stationary	3	1	whole cell extract	8	1D-Gel separation	-
002	170127_V2_PM3_CHi_D39_dphpP_statBR3_9.raw	LTQ Orbitrap Velos (V2)	ΔphpP	RPMI modified	stationary	3	1	whole cell extract	9	1D-Gel separation	-
002	170127_V2_PM3_CHi_D39_dphpP_statBR3_10.raw	LTQ Orbitrap Velos (V2)	ΔphpP	RPMI modified	stationary	3	1	whole cell extract	10	1D-Gel separation	-
003	170814_V2_P3_MA_D39_WT_THY_exp_1_01.raw	LTQ Orbitrap Velos (V2)	WT	THY	exponential	1	1	whole cell extract	1	1D-Gel separation	-
003	170814_V2_P3_MA_D39_WT_THY_exp_1_02.raw	LTQ Orbitrap Velos (V2)	WT	THY	exponential	1	1	whole cell extract	2	1D-Gel separation	-
003	170814_V2_P3_MA_D39_WT_THY_exp_1_03.raw	LTQ Orbitrap Velos (V2)	WT	THY	exponential	1	1	whole cell extract	3	1D-Gel separation	-
003	170814_V2_P3_MA_D39_WT_THY_exp_1_04.raw	LTQ Orbitrap Velos (V2)	WT	THY	exponential	1	1	whole cell extract	4	1D-Gel separation	-
003	170814_V2_P3_MA_D39_WT_THY_exp_1_05.raw	LTQ Orbitrap Velos (V2)	WT	THY	exponential	1	1	whole cell extract	5	1D-Gel separation	-
003	170814_V2_P3_MA_D39_WT_THY_exp_1_06.raw	LTQ Orbitrap Velos (V2)	WT	THY	exponential	1	1	whole cell extract	6	1D-Gel separation	-
003	170814_V2_P3_MA_D39_WT_THY_exp_1_07.raw	LTQ Orbitrap Velos (V2)	WT	THY	exponential	1	1	whole cell extract	7	1D-Gel separation	-
003	170814_V2_P3_MA_D39_WT_THY_exp_1_08.raw	LTQ Orbitrap Velos (V2)	WT	THY	exponential	1	1	whole cell extract	8	1D-Gel separation	-
003	170814_V2_P3_MA_D39_WT_THY_exp_1_09.raw	LTQ Orbitrap Velos (V2)	WT	THY	exponential	1	1	whole cell extract	9	1D-Gel separation	-
003	170814_V2_P3_MA_D39_WT_THY_exp_1_10.raw	LTQ Orbitrap Velos (V2)	WT	THY	exponential	1	1	whole cell extract	10	1D-Gel separation	-
003	170815_V2_P3_MA_D39_WT_THY_exp_2_01.raw	LTQ Orbitrap Velos (V2)	WT	THY	exponential	2	1	whole cell extract	1	1D-Gel separation	-
003	170815_V2_P3_MA_D39_WT_THY_exp_2_02.raw	LTQ Orbitrap Velos (V2)	WT	THY	exponential	2	1	whole cell extract	2	1D-Gel separation	-
003	170815_V2_P3_MA_D39_WT_THY_exp_2_03.raw	LTQ Orbitrap Velos (V2)	WT	THY	exponential	2	1	whole cell extract	3	1D-Gel separation	-
003	170815_V2_P3_MA_D39_WT_THY_exp_2_04.raw	LTQ Orbitrap Velos (V2)	WT	THY	exponential	2	1	whole cell extract	4	1D-Gel separation	-
003	170815_V2_P3_MA_D39_WT_THY_exp_2_05.raw	LTQ Orbitrap Velos (V2)	WT	THY	exponential	2	1	whole cell extract	5	1D-Gel separation	-
003	170815_V2_P3_MA_D39_WT_THY_exp_2_06.raw	LTQ Orbitrap Velos (V2)	WT	THY	exponential	2	1	whole cell extract	6	1D-Gel separation	-
003	170815_V2_P3_MA_D39_WT_THY_exp_2_07.raw	LTQ Orbitrap Velos (V2)	WT	THY	exponential	2	1	whole cell extract	7	1D-Gel separation	-
003	170815_V2_P3_MA_D39_WT_THY_exp_2_08.raw	LTQ Orbitrap Velos (V2)	WT	THY	exponential	2	1	whole cell extract	8	1D-Gel separation	-
003	170815_V2_P3_MA_D39_WT_THY_exp_2_09.raw	LTQ Orbitrap Velos (V2)	WT	THY	exponential	2	1	whole cell extract	9	1D-Gel separation	-
003	170815_V2_P3_MA_D39_WT_THY_exp_2_10.raw	LTQ Orbitrap Velos (V2)	WT	THY	exponential	2	1	whole cell extract	10	1D-Gel separation	-
003	170816_V2_P3_MA_D39_WT_THY_exp_3_01.raw	LTQ Orbitrap Velos (V2)	WT	THY	exponential	3	1	whole cell extract	1	1D-Gel separation	-
003	170816_V2_P3_MA_D39_WT_THY_exp_3_02.raw	LTQ Orbitrap Velos (V2)	WT	THY	exponential	3	1	whole cell extract	2	1D-Gel separation	-
003	170816_V2_P3_MA_D39_WT_THY_exp_3_03.raw	LTQ Orbitrap Velos (V2)	WT	THY	exponential	3	1	whole cell extract	3	1D-Gel separation	-
003	170816_V2_P3_MA_D39_WT_THY_exp_3_04.raw	LTQ Orbitrap Velos (V2)	WT	THY	exponential	3	1	whole cell extract	4	1D-Gel separation	-
003	170816_V2_P3_MA_D39_WT_THY_exp_3_05.raw	LTQ Orbitrap Velos (V2)	WT	THY	exponential	3	1	whole cell extract	5	1D-Gel separation	-
003	170816_V2_P3_MA_D39_WT_THY_exp_3_06.raw	LTQ Orbitrap Velos (V2)	WT	THY	exponential	3	1	whole cell extract	6	1D-Gel separation	-
003	170816_V2_P3_MA_D39_WT_THY_exp_3_07.raw	LTQ Orbitrap Velos (V2)	WT	THY	exponential	3	1	whole cell extract	7	1D-Gel separation	-
003	170816_V2_P3_MA_D39_WT_THY_exp_3_08.raw	LTQ Orbitrap Velos (V2)	WT	THY	exponential	3	1	whole cell extract	8	1D-Gel separation	-
003	170816_V2_P3_MA_D39_WT_THY_exp_3_09.raw	LTQ Orbitrap Velos (V2)	WT	THY	exponential	3	1	whole cell extract	9	1D-Gel separation	-
003	170816_V2_P3_MA_D39_WT_THY_exp_3_10.raw	LTQ Orbitrap Velos (V2)	WT	THY	exponential	3	1	whole cell extract	10	1D-Gel separation	-
003	170831_V2_P3_CHi_D39_dstkP_THY_exp_1_01.raw	LTQ Orbitrap Velos (V2)	ΔstkP	THY	exponential	1	1	whole cell extract	1	1D-Gel separation	-
003	170831_V2_P3_CHi_D39_dstkP_THY_exp_1_02.raw	LTQ Orbitrap Velos (V2)	ΔstkP	THY	exponential	1	1	whole cell extract	2	1D-Gel separation	-
003	170831_V2_P3_CHi_D39_dstkP_THY_exp_1_03.raw	LTQ Orbitrap Velos (V2)	ΔstkP	THY	exponential	1	1	whole cell extract	3	1D-Gel separation	-
003	170831_V2_P3_CHi_D39_dstkP_THY_exp_1_04.raw	LTQ Orbitrap Velos (V2)	ΔstkP	THY	exponential	1	1	whole cell extract	4	1D-Gel separation	-
003	170831_V2_P3_CHi_D39_dstkP_THY_exp_1_05.raw	LTQ Orbitrap Velos (V2)	ΔstkP	THY	exponential	1	1	whole cell extract	5	1D-Gel separation	-
003	170831_V2_P3_CHi_D39_dstkP_THY_exp_1_06.raw	LTQ Orbitrap Velos (V2)	ΔstkP	THY	exponential	1	1	whole cell extract	6	1D-Gel separation	-
003	170831_V2_P3_CHi_D39_dstkP_THY_exp_1_07.raw	LTQ Orbitrap Velos (V2)	ΔstkP	THY	exponential	1	1	whole cell extract	7	1D-Gel separation	-
003	170831_V2_P3_CHi_D39_dstkP_THY_exp_1_08.raw	LTQ Orbitrap Velos (V2)	ΔstkP	THY	exponential	1	1	whole cell extract	8	1D-Gel separation	-
003	170831_V2_P3_CHi_D39_dstkP_THY_exp_1_09.raw	LTQ Orbitrap Velos (V2)	ΔstkP	THY	exponential	1	1	whole cell extract	9	1D-Gel separation	-
003	170831_V2_P3_CHi_D39_dstkP_THY_exp_1_10.raw	LTQ Orbitrap Velos (V2)	ΔstkP	THY	exponential	1	1	whole cell extract	10	1D-Gel separation	-
003	170901_V2_P3_CHi_D39_dstkP_THY_exp_2_01.raw	LTQ Orbitrap Velos (V2)	ΔstkP	THY	exponential	2	1	whole cell extract	1	1D-Gel separation	-
003	170901_V2_P3_CHi_D39_dstkP_THY_exp_2_02.raw	LTQ Orbitrap Velos (V2)	ΔstkP	THY	exponential	2	1	whole cell extract	2	1D-Gel separation	-
003	170901_V2_P3_CHi_D39_dstkP_THY_exp_2_03.raw	LTQ Orbitrap Velos (V2)	ΔstkP	THY	exponential	2	1	whole cell extract	3	1D-Gel separation	-
003	170901_V2_P3_CHi_D39_dstkP_THY_exp_2_04.raw	LTQ Orbitrap Velos (V2)	ΔstkP	THY	exponential	2	1	whole cell extract	4	1D-Gel separation	-
003	170901_V2_P3_CHi_D39_dstkP_THY_exp_2_05.raw	LTQ Orbitrap Velos (V2)	ΔstkP	THY	exponential	2	1	whole cell extract	5	1D-Gel separation	-
003	170901_V2_P3_CHi_D39_dstkP_THY_exp_2_06.raw	LTQ Orbitrap Velos (V2)	ΔstkP	THY	exponential	2	1	whole cell extract	6	1D-Gel separation	-
003	170901_V2_P3_CHi_D39_dstkP_THY_exp_2_07.raw	LTQ Orbitrap Velos (V2)	ΔstkP	THY	exponential	2	1	whole cell extract	7	1D-Gel separation	-
003	170901_V2_P3_CHi_D39_dstkP_THY_exp_2_08.raw	LTQ Orbitrap Velos (V2)	ΔstkP	THY	exponential	2	1	whole cell extract	8	1D-Gel separation	-
003	170901_V2_P3_CHi_D39_dstkP_THY_exp_2_09.raw	LTQ Orbitrap Velos (V2)	ΔstkP	THY	exponential	2	1	whole cell extract	9	1D-Gel separation	-
003	170901_V2_P3_CHi_D39_dstkP_THY_exp_2_10.raw	LTQ Orbitrap Velos (V2)	ΔstkP	THY	exponential	2	1	whole cell extract	10	1D-Gel separation	-
003	170902_V2_P3_CHi_D39_dstkP_THY_exp_3_01.raw	LTQ Orbitrap Velos (V2)	ΔstkP	THY	exponential	3	1	whole cell extract	1	1D-Gel separation	-
003	170902_V2_P3_CHi_D39_dstkP_THY_exp_3_02.raw	LTQ Orbitrap Velos (V2)	ΔstkP	THY	exponential	3	1	whole cell extract	2	1D-Gel separation	-
003	170902_V2_P3_CHi_D39_dstkP_THY_exp_3_03.raw	LTQ Orbitrap Velos (V2)	ΔstkP	THY	exponential	3	1	whole cell extract	3	1D-Gel separation	-
003	170902_V2_P3_CHi_D39_dstkP_THY_exp_3_04.raw	LTQ Orbitrap Velos (V2)	ΔstkP	THY	exponential	3	1	whole cell extract	4	1D-Gel separation	-
003	170902_V2_P3_CHi_D39_dstkP_THY_exp_3_05.raw	LTQ Orbitrap Velos (V2)	ΔstkP	THY	exponential	3	1	whole cell extract	5	1D-Gel separation	-
003	170902_V2_P3_CHi_D39_dstkP_THY_exp_3_06.raw	LTQ Orbitrap Velos (V2)	ΔstkP	THY	exponential	3	1	whole cell extract	6	1D-Gel separation	-
003	170902_V2_P3_CHi_D39_dstkP_THY_exp_3_07.raw	LTQ Orbitrap Velos (V2)	ΔstkP	THY	exponential	3	1	whole cell extract	7	1D-Gel separation	-
003	170902_V2_P3_CHi_D39_dstkP_THY_exp_3_08.raw	LTQ Orbitrap Velos (V2)	ΔstkP	THY	exponential	3	1	whole cell extract	8	1D-Gel separation	-
003	170902_V2_P3_CHi_D39_dstkP_THY_exp_3_09.raw	LTQ Orbitrap Velos (V2)	ΔstkP	THY	exponential	3	1	whole cell extract	9	1D-Gel separation	-
003	170902_V2_P3_CHi_D39_dstkP_THY_exp_3_10.raw	LTQ Orbitrap Velos (V2)	ΔstkP	THY	exponential	3	1	whole cell extract	10	1D-Gel separation	-
003	170823_V2_P3_CHi_D39_dphpP_THY_exp_1_01.raw	LTQ Orbitrap Velos (V2)	ΔphpP	THY	exponential	1	1	whole cell extract	1	1D-Gel separation	-
003	170823_V2_P3_CHi_D39_dphpP_THY_exp_1_02.raw	LTQ Orbitrap Velos (V2)	ΔphpP	THY	exponential	1	1	whole cell extract	2	1D-Gel separation	-
003	170823_V2_P3_CHi_D39_dphpP_THY_exp_1_03.raw	LTQ Orbitrap Velos (V2)	ΔphpP	THY	exponential	1	1	whole cell extract	3	1D-Gel separation	-
003	170823_V2_P3_CHi_D39_dphpP_THY_exp_1_04.raw	LTQ Orbitrap Velos (V2)	ΔphpP	THY	exponential	1	1	whole cell extract	4	1D-Gel separation	-
003	170823_V2_P3_CHi_D39_dphpP_THY_exp_1_05.raw	LTQ Orbitrap Velos (V2)	ΔphpP	THY	exponential	1	1	whole cell extract	5	1D-Gel separation	-
003	170823_V2_P3_CHi_D39_dphpP_THY_exp_1_06.raw	LTQ Orbitrap Velos (V2)	ΔphpP	THY	exponential	1	1	whole cell extract	6	1D-Gel separation	-
003	170823_V2_P3_CHi_D39_dphpP_THY_exp_1_07.raw	LTQ Orbitrap Velos (V2)	ΔphpP	THY	exponential	1	1	whole cell extract	7	1D-Gel separation	-
003	170823_V2_P3_CHi_D39_dphpP_THY_exp_1_08.raw	LTQ Orbitrap Velos (V2)	ΔphpP	THY	exponential	1	1	whole cell extract	8	1D-Gel separation	-
003	170823_V2_P3_CHi_D39_dphpP_THY_exp_1_09.raw	LTQ Orbitrap Velos (V2)	ΔphpP	THY	exponential	1	1	whole cell extract	9	1D-Gel separation	-
003	170823_V2_P3_CHi_D39_dphpP_THY_exp_1_10.raw	LTQ Orbitrap Velos (V2)	ΔphpP	THY	exponential	1	1	whole cell extract	10	1D-Gel separation	-
003	170824_V2_P3_CHi_D39_dphpP_THY_exp_2_01.raw	LTQ Orbitrap Velos (V2)	ΔphpP	THY	exponential	2	1	whole cell extract	1	1D-Gel separation	-
003	170824_V2_P3_CHi_D39_dphpP_THY_exp_2_02.raw	LTQ Orbitrap Velos (V2)	ΔphpP	THY	exponential	2	1	whole cell extract	2	1D-Gel separation	-
003	170824_V2_P3_CHi_D39_dphpP_THY_exp_2_03.raw	LTQ Orbitrap Velos (V2)	ΔphpP	THY	exponential	2	1	whole cell extract	3	1D-Gel separation	-
003	170824_V2_P3_CHi_D39_dphpP_THY_exp_2_04.raw	LTQ Orbitrap Velos (V2)	ΔphpP	THY	exponential	2	1	whole cell extract	4	1D-Gel separation	-
003	170824_V2_P3_CHi_D39_dphpP_THY_exp_2_05.raw	LTQ Orbitrap Velos (V2)	ΔphpP	THY	exponential	2	1	whole cell extract	5	1D-Gel separation	-
003	170824_V2_P3_CHi_D39_dphpP_THY_exp_2_06.raw	LTQ Orbitrap Velos (V2)	ΔphpP	THY	exponential	2	1	whole cell extract	6	1D-Gel separation	-
003	170824_V2_P3_CHi_D39_dphpP_THY_exp_2_07.raw	LTQ Orbitrap Velos (V2)	ΔphpP	THY	exponential	2	1	whole cell extract	7	1D-Gel separation	-
003	170824_V2_P3_CHi_D39_dphpP_THY_exp_2_08.raw	LTQ Orbitrap Velos (V2)	ΔphpP	THY	exponential	2	1	whole cell extract	8	1D-Gel separation	-
003	170824_V2_P3_CHi_D39_dphpP_THY_exp_2_09.raw	LTQ Orbitrap Velos (V2)	ΔphpP	THY	exponential	2	1	whole cell extract	9	1D-Gel separation	-
003	170824_V2_P3_CHi_D39_dphpP_THY_exp_2_10.raw	LTQ Orbitrap Velos (V2)	ΔphpP	THY	exponential	2	1	whole cell extract	10	1D-Gel separation	-
003	170825_V2_P3_CHi_D39_dphpP_THY_exp_3_01.raw	LTQ Orbitrap Velos (V2)	ΔphpP	THY	exponential	3	1	whole cell extract	1	1D-Gel separation	-
003	170825_V2_P3_CHi_D39_dphpP_THY_exp_3_02.raw	LTQ Orbitrap Velos (V2)	ΔphpP	THY	exponential	3	1	whole cell extract	2	1D-Gel separation	-
003	170825_V2_P3_CHi_D39_dphpP_THY_exp_3_03.raw	LTQ Orbitrap Velos (V2)	ΔphpP	THY	exponential	3	1	whole cell extract	3	1D-Gel separation	-
003	170825_V2_P3_CHi_D39_dphpP_THY_exp_3_04.raw	LTQ Orbitrap Velos (V2)	ΔphpP	THY	exponential	3	1	whole cell extract	4	1D-Gel separation	-
003	170825_V2_P3_CHi_D39_dphpP_THY_exp_3_05.raw	LTQ Orbitrap Velos (V2)	ΔphpP	THY	exponential	3	1	whole cell extract	5	1D-Gel separation	-
003	170825_V2_P3_CHi_D39_dphpP_THY_exp_3_06.raw	LTQ Orbitrap Velos (V2)	ΔphpP	THY	exponential	3	1	whole cell extract	6	1D-Gel separation	-
003	170825_V2_P3_CHi_D39_dphpP_THY_exp_3_07.raw	LTQ Orbitrap Velos (V2)	ΔphpP	THY	exponential	3	1	whole cell extract	7	1D-Gel separation	-
003	170825_V2_P3_CHi_D39_dphpP_THY_exp_3_08.raw	LTQ Orbitrap Velos (V2)	ΔphpP	THY	exponential	3	1	whole cell extract	8	1D-Gel separation	-
003	170825_V2_P3_CHi_D39_dphpP_THY_exp_3_09.raw	LTQ Orbitrap Velos (V2)	ΔphpP	THY	exponential	3	1	whole cell extract	9	1D-Gel separation	-
003	170825_V2_P3_CHi_D39_dphpP_THY_exp_3_10.raw	LTQ Orbitrap Velos (V2)	ΔphpP	THY	exponential	3	1	whole cell extract	10	1D-Gel separation	-
004	170820_V2_P3_MA_D39_WT_THY_stat_1_01.raw	LTQ Orbitrap Velos (V2)	WT	THY	stationary	1	1	whole cell extract	1	1D-Gel separation	-
004	170820_V2_P3_MA_D39_WT_THY_stat_1_02.raw	LTQ Orbitrap Velos (V2)	WT	THY	stationary	1	1	whole cell extract	2	1D-Gel separation	-
004	170820_V2_P3_MA_D39_WT_THY_stat_1_03.raw	LTQ Orbitrap Velos (V2)	WT	THY	stationary	1	1	whole cell extract	3	1D-Gel separation	-
004	170820_V2_P3_MA_D39_WT_THY_stat_1_04.raw	LTQ Orbitrap Velos (V2)	WT	THY	stationary	1	1	whole cell extract	4	1D-Gel separation	-
004	170820_V2_P3_MA_D39_WT_THY_stat_1_05.raw	LTQ Orbitrap Velos (V2)	WT	THY	stationary	1	1	whole cell extract	5	1D-Gel separation	-
004	170820_V2_P3_MA_D39_WT_THY_stat_1_06.raw	LTQ Orbitrap Velos (V2)	WT	THY	stationary	1	1	whole cell extract	6	1D-Gel separation	-
004	170820_V2_P3_MA_D39_WT_THY_stat_1_07.raw	LTQ Orbitrap Velos (V2)	WT	THY	stationary	1	1	whole cell extract	7	1D-Gel separation	-
004	170820_V2_P3_MA_D39_WT_THY_stat_1_08.raw	LTQ Orbitrap Velos (V2)	WT	THY	stationary	1	1	whole cell extract	8	1D-Gel separation	-
004	170820_V2_P3_MA_D39_WT_THY_stat_1_09.raw	LTQ Orbitrap Velos (V2)	WT	THY	stationary	1	1	whole cell extract	9	1D-Gel separation	-
004	170820_V2_P3_MA_D39_WT_THY_stat_1_10.raw	LTQ Orbitrap Velos (V2)	WT	THY	stationary	1	1	whole cell extract	10	1D-Gel separation	-
004	170821_V2_P3_MA_D39_WT_THY_stat_2_01.raw	LTQ Orbitrap Velos (V2)	WT	THY	stationary	2	1	whole cell extract	1	1D-Gel separation	-
004	170821_V2_P3_MA_D39_WT_THY_stat_2_02.raw	LTQ Orbitrap Velos (V2)	WT	THY	stationary	2	1	whole cell extract	2	1D-Gel separation	-
004	170821_V2_P3_MA_D39_WT_THY_stat_2_03.raw	LTQ Orbitrap Velos (V2)	WT	THY	stationary	2	1	whole cell extract	3	1D-Gel separation	-
004	170821_V2_P3_MA_D39_WT_THY_stat_2_04.raw	LTQ Orbitrap Velos (V2)	WT	THY	stationary	2	1	whole cell extract	4	1D-Gel separation	-
004	170821_V2_P3_MA_D39_WT_THY_stat_2_05.raw	LTQ Orbitrap Velos (V2)	WT	THY	stationary	2	1	whole cell extract	5	1D-Gel separation	-
004	170821_V2_P3_MA_D39_WT_THY_stat_2_06.raw	LTQ Orbitrap Velos (V2)	WT	THY	stationary	2	1	whole cell extract	6	1D-Gel separation	-
004	170821_V2_P3_MA_D39_WT_THY_stat_2_07.raw	LTQ Orbitrap Velos (V2)	WT	THY	stationary	2	1	whole cell extract	7	1D-Gel separation	-
004	170821_V2_P3_MA_D39_WT_THY_stat_2_08.raw	LTQ Orbitrap Velos (V2)	WT	THY	stationary	2	1	whole cell extract	8	1D-Gel separation	-
004	170821_V2_P3_MA_D39_WT_THY_stat_2_09.raw	LTQ Orbitrap Velos (V2)	WT	THY	stationary	2	1	whole cell extract	9	1D-Gel separation	-
004	170821_V2_P3_MA_D39_WT_THY_stat_2_10.raw	LTQ Orbitrap Velos (V2)	WT	THY	stationary	2	1	whole cell extract	10	1D-Gel separation	-
004	170822_V2_P3_MA_D39_WT_THY_stat_3_01.raw	LTQ Orbitrap Velos (V2)	WT	THY	stationary	3	1	whole cell extract	1	1D-Gel separation	-
004	170822_V2_P3_MA_D39_WT_THY_stat_3_02.raw	LTQ Orbitrap Velos (V2)	WT	THY	stationary	3	1	whole cell extract	2	1D-Gel separation	-
004	170822_V2_P3_MA_D39_WT_THY_stat_3_03.raw	LTQ Orbitrap Velos (V2)	WT	THY	stationary	3	1	whole cell extract	3	1D-Gel separation	-
004	170822_V2_P3_MA_D39_WT_THY_stat_3_04.raw	LTQ Orbitrap Velos (V2)	WT	THY	stationary	3	1	whole cell extract	4	1D-Gel separation	-
004	170822_V2_P3_MA_D39_WT_THY_stat_3_05.raw	LTQ Orbitrap Velos (V2)	WT	THY	stationary	3	1	whole cell extract	5	1D-Gel separation	-
004	170822_V2_P3_MA_D39_WT_THY_stat_3_06.raw	LTQ Orbitrap Velos (V2)	WT	THY	stationary	3	1	whole cell extract	6	1D-Gel separation	-
004	170822_V2_P3_MA_D39_WT_THY_stat_3_07.raw	LTQ Orbitrap Velos (V2)	WT	THY	stationary	3	1	whole cell extract	7	1D-Gel separation	-
004	170822_V2_P3_MA_D39_WT_THY_stat_3_08.raw	LTQ Orbitrap Velos (V2)	WT	THY	stationary	3	1	whole cell extract	8	1D-Gel separation	-
004	170822_V2_P3_MA_D39_WT_THY_stat_3_09.raw	LTQ Orbitrap Velos (V2)	WT	THY	stationary	3	1	whole cell extract	9	1D-Gel separation	-
004	170822_V2_P3_MA_D39_WT_THY_stat_3_10.raw	LTQ Orbitrap Velos (V2)	WT	THY	stationary	3	1	whole cell extract	10	1D-Gel separation	-
004	170904_V2_P3_CHi_D39_dstkP_THY_stat_1_01.raw	LTQ Orbitrap Velos (V2)	ΔstkP	THY	stationary	1	1	whole cell extract	1	1D-Gel separation	-
004	170904_V2_P3_CHi_D39_dstkP_THY_stat_1_02.raw	LTQ Orbitrap Velos (V2)	ΔstkP	THY	stationary	1	1	whole cell extract	2	1D-Gel separation	-
004	170904_V2_P3_CHi_D39_dstkP_THY_stat_1_03.raw	LTQ Orbitrap Velos (V2)	ΔstkP	THY	stationary	1	1	whole cell extract	3	1D-Gel separation	-
004	170904_V2_P3_CHi_D39_dstkP_THY_stat_1_04.raw	LTQ Orbitrap Velos (V2)	ΔstkP	THY	stationary	1	1	whole cell extract	4	1D-Gel separation	-
004	170904_V2_P3_CHi_D39_dstkP_THY_stat_1_05.raw	LTQ Orbitrap Velos (V2)	ΔstkP	THY	stationary	1	1	whole cell extract	5	1D-Gel separation	-
004	170904_V2_P3_CHi_D39_dstkP_THY_stat_1_06.raw	LTQ Orbitrap Velos (V2)	ΔstkP	THY	stationary	1	1	whole cell extract	6	1D-Gel separation	-
004	170904_V2_P3_CHi_D39_dstkP_THY_stat_1_07.raw	LTQ Orbitrap Velos (V2)	ΔstkP	THY	stationary	1	1	whole cell extract	7	1D-Gel separation	-
004	170904_V2_P3_CHi_D39_dstkP_THY_stat_1_08.raw	LTQ Orbitrap Velos (V2)	ΔstkP	THY	stationary	1	1	whole cell extract	8	1D-Gel separation	-
004	170904_V2_P3_CHi_D39_dstkP_THY_stat_1_09.raw	LTQ Orbitrap Velos (V2)	ΔstkP	THY	stationary	1	1	whole cell extract	9	1D-Gel separation	-
004	170904_V2_P3_CHi_D39_dstkP_THY_stat_1_10.raw	LTQ Orbitrap Velos (V2)	ΔstkP	THY	stationary	1	1	whole cell extract	10	1D-Gel separation	-
004	170905_V2_P3_CHi_D39_dstkP_THY_stat_2_01.raw	LTQ Orbitrap Velos (V2)	ΔstkP	THY	stationary	2	1	whole cell extract	1	1D-Gel separation	-
004	170905_V2_P3_CHi_D39_dstkP_THY_stat_2_02.raw	LTQ Orbitrap Velos (V2)	ΔstkP	THY	stationary	2	1	whole cell extract	2	1D-Gel separation	-
004	170905_V2_P3_CHi_D39_dstkP_THY_stat_2_03.raw	LTQ Orbitrap Velos (V2)	ΔstkP	THY	stationary	2	1	whole cell extract	3	1D-Gel separation	-
004	170905_V2_P3_CHi_D39_dstkP_THY_stat_2_04.raw	LTQ Orbitrap Velos (V2)	ΔstkP	THY	stationary	2	1	whole cell extract	4	1D-Gel separation	-
004	170905_V2_P3_CHi_D39_dstkP_THY_stat_2_05.raw	LTQ Orbitrap Velos (V2)	ΔstkP	THY	stationary	2	1	whole cell extract	5	1D-Gel separation	-
004	170905_V2_P3_CHi_D39_dstkP_THY_stat_2_06.raw	LTQ Orbitrap Velos (V2)	ΔstkP	THY	stationary	2	1	whole cell extract	6	1D-Gel separation	-
004	170905_V2_P3_CHi_D39_dstkP_THY_stat_2_07.raw	LTQ Orbitrap Velos (V2)	ΔstkP	THY	stationary	2	1	whole cell extract	7	1D-Gel separation	-
004	170905_V2_P3_CHi_D39_dstkP_THY_stat_2_08.raw	LTQ Orbitrap Velos (V2)	ΔstkP	THY	stationary	2	1	whole cell extract	8	1D-Gel separation	-
004	170905_V2_P3_CHi_D39_dstkP_THY_stat_2_09.raw	LTQ Orbitrap Velos (V2)	ΔstkP	THY	stationary	2	1	whole cell extract	9	1D-Gel separation	-
004	170905_V2_P3_CHi_D39_dstkP_THY_stat_2_10.raw	LTQ Orbitrap Velos (V2)	ΔstkP	THY	stationary	2	1	whole cell extract	10	1D-Gel separation	-
004	170906_V2_P3_CHi_D39_dstkP_THY_stat_3_01.raw	LTQ Orbitrap Velos (V2)	ΔstkP	THY	stationary	3	1	whole cell extract	1	1D-Gel separation	-
004	170906_V2_P3_CHi_D39_dstkP_THY_stat_3_02.raw	LTQ Orbitrap Velos (V2)	ΔstkP	THY	stationary	3	1	whole cell extract	2	1D-Gel separation	-
004	170906_V2_P3_CHi_D39_dstkP_THY_stat_3_03.raw	LTQ Orbitrap Velos (V2)	ΔstkP	THY	stationary	3	1	whole cell extract	3	1D-Gel separation	-
004	170906_V2_P3_CHi_D39_dstkP_THY_stat_3_04.raw	LTQ Orbitrap Velos (V2)	ΔstkP	THY	stationary	3	1	whole cell extract	4	1D-Gel separation	-
004	170906_V2_P3_CHi_D39_dstkP_THY_stat_3_05.raw	LTQ Orbitrap Velos (V2)	ΔstkP	THY	stationary	3	1	whole cell extract	5	1D-Gel separation	-
004	170906_V2_P3_CHi_D39_dstkP_THY_stat_3_06.raw	LTQ Orbitrap Velos (V2)	ΔstkP	THY	stationary	3	1	whole cell extract	6	1D-Gel separation	-
004	170906_V2_P3_CHi_D39_dstkP_THY_stat_3_07.raw	LTQ Orbitrap Velos (V2)	ΔstkP	THY	stationary	3	1	whole cell extract	7	1D-Gel separation	-
004	170906_V2_P3_CHi_D39_dstkP_THY_stat_3_08.raw	LTQ Orbitrap Velos (V2)	ΔstkP	THY	stationary	3	1	whole cell extract	8	1D-Gel separation	-
004	170906_V2_P3_CHi_D39_dstkP_THY_stat_3_09.raw	LTQ Orbitrap Velos (V2)	ΔstkP	THY	stationary	3	1	whole cell extract	9	1D-Gel separation	-
004	170906_V2_P3_CHi_D39_dstkP_THY_stat_3_10.raw	LTQ Orbitrap Velos (V2)	ΔstkP	THY	stationary	3	1	whole cell extract	10	1D-Gel separation	-
004	170826_V2_P3_CHi_D39_dphpP_THY_stat_1_01.raw	LTQ Orbitrap Velos (V2)	ΔphpP	THY	stationary	1	1	whole cell extract	1	1D-Gel separation	-
004	170826_V2_P3_CHi_D39_dphpP_THY_stat_1_02.raw	LTQ Orbitrap Velos (V2)	ΔphpP	THY	stationary	1	1	whole cell extract	2	1D-Gel separation	-
004	170826_V2_P3_CHi_D39_dphpP_THY_stat_1_03.raw	LTQ Orbitrap Velos (V2)	ΔphpP	THY	stationary	1	1	whole cell extract	3	1D-Gel separation	-
004	170826_V2_P3_CHi_D39_dphpP_THY_stat_1_04.raw	LTQ Orbitrap Velos (V2)	ΔphpP	THY	stationary	1	1	whole cell extract	4	1D-Gel separation	-
004	170826_V2_P3_CHi_D39_dphpP_THY_stat_1_05.raw	LTQ Orbitrap Velos (V2)	ΔphpP	THY	stationary	1	1	whole cell extract	5	1D-Gel separation	-
004	170826_V2_P3_CHi_D39_dphpP_THY_stat_1_06.raw	LTQ Orbitrap Velos (V2)	ΔphpP	THY	stationary	1	1	whole cell extract	6	1D-Gel separation	-
004	170826_V2_P3_CHi_D39_dphpP_THY_stat_1_07.raw	LTQ Orbitrap Velos (V2)	ΔphpP	THY	stationary	1	1	whole cell extract	7	1D-Gel separation	-
004	170826_V2_P3_CHi_D39_dphpP_THY_stat_1_08.raw	LTQ Orbitrap Velos (V2)	ΔphpP	THY	stationary	1	1	whole cell extract	8	1D-Gel separation	-
004	170826_V2_P3_CHi_D39_dphpP_THY_stat_1_09.raw	LTQ Orbitrap Velos (V2)	ΔphpP	THY	stationary	1	1	whole cell extract	9	1D-Gel separation	-
004	170826_V2_P3_CHi_D39_dphpP_THY_stat_1_10.raw	LTQ Orbitrap Velos (V2)	ΔphpP	THY	stationary	1	1	whole cell extract	10	1D-Gel separation	-
004	170827_V2_P3_CHi_D39_dphpP_THY_stat_2_01.raw	LTQ Orbitrap Velos (V2)	ΔphpP	THY	stationary	2	1	whole cell extract	1	1D-Gel separation	-
004	170827_V2_P3_CHi_D39_dphpP_THY_stat_2_02.raw	LTQ Orbitrap Velos (V2)	ΔphpP	THY	stationary	2	1	whole cell extract	2	1D-Gel separation	-
004	170827_V2_P3_CHi_D39_dphpP_THY_stat_2_03.raw	LTQ Orbitrap Velos (V2)	ΔphpP	THY	stationary	2	1	whole cell extract	3	1D-Gel separation	-
004	170827_V2_P3_CHi_D39_dphpP_THY_stat_2_04.raw	LTQ Orbitrap Velos (V2)	ΔphpP	THY	stationary	2	1	whole cell extract	4	1D-Gel separation	-
004	170827_V2_P3_CHi_D39_dphpP_THY_stat_2_05.raw	LTQ Orbitrap Velos (V2)	ΔphpP	THY	stationary	2	1	whole cell extract	5	1D-Gel separation	-
004	170827_V2_P3_CHi_D39_dphpP_THY_stat_2_06.raw	LTQ Orbitrap Velos (V2)	ΔphpP	THY	stationary	2	1	whole cell extract	6	1D-Gel separation	-
004	170827_V2_P3_CHi_D39_dphpP_THY_stat_2_07.raw	LTQ Orbitrap Velos (V2)	ΔphpP	THY	stationary	2	1	whole cell extract	7	1D-Gel separation	-
004	170827_V2_P3_CHi_D39_dphpP_THY_stat_2_08.raw	LTQ Orbitrap Velos (V2)	ΔphpP	THY	stationary	2	1	whole cell extract	8	1D-Gel separation	-
004	170827_V2_P3_CHi_D39_dphpP_THY_stat_2_09.raw	LTQ Orbitrap Velos (V2)	ΔphpP	THY	stationary	2	1	whole cell extract	9	1D-Gel separation	-
004	170827_V2_P3_CHi_D39_dphpP_THY_stat_2_10.raw	LTQ Orbitrap Velos (V2)	ΔphpP	THY	stationary	2	1	whole cell extract	10	1D-Gel separation	-
004	170829_V2_P3_CHi_D39_dphpP_THY_stat_3_01.raw	LTQ Orbitrap Velos (V2)	ΔphpP	THY	stationary	3	1	whole cell extract	1	1D-Gel separation	-
004	170829_V2_P3_CHi_D39_dphpP_THY_stat_3_02.raw	LTQ Orbitrap Velos (V2)	ΔphpP	THY	stationary	3	1	whole cell extract	2	1D-Gel separation	-
004	170829_V2_P3_CHi_D39_dphpP_THY_stat_3_03.raw	LTQ Orbitrap Velos (V2)	ΔphpP	THY	stationary	3	1	whole cell extract	3	1D-Gel separation	-
004	170829_V2_P3_CHi_D39_dphpP_THY_stat_3_04.raw	LTQ Orbitrap Velos (V2)	ΔphpP	THY	stationary	3	1	whole cell extract	4	1D-Gel separation	-
004	170829_V2_P3_CHi_D39_dphpP_THY_stat_3_05.raw	LTQ Orbitrap Velos (V2)	ΔphpP	THY	stationary	3	1	whole cell extract	5	1D-Gel separation	-
004	170829_V2_P3_CHi_D39_dphpP_THY_stat_3_06.raw	LTQ Orbitrap Velos (V2)	ΔphpP	THY	stationary	3	1	whole cell extract	6	1D-Gel separation	-
004	170829_V2_P3_CHi_D39_dphpP_THY_stat_3_07.raw	LTQ Orbitrap Velos (V2)	ΔphpP	THY	stationary	3	1	whole cell extract	7	1D-Gel separation	-
004	170829_V2_P3_CHi_D39_dphpP_THY_stat_3_08.raw	LTQ Orbitrap Velos (V2)	ΔphpP	THY	stationary	3	1	whole cell extract	8	1D-Gel separation	-
004	170829_V2_P3_CHi_D39_dphpP_THY_stat_3_09.raw	LTQ Orbitrap Velos (V2)	ΔphpP	THY	stationary	3	1	whole cell extract	9	1D-Gel separation	-
004	170829_V2_P3_CHi_D39_dphpP_THY_stat_3_10.raw	LTQ Orbitrap Velos (V2)	ΔphpP	THY	stationary	3	1	whole cell extract	10	1D-Gel separation	-
005	150401_VE1_PM1_JHo_Pneu_intra_Gel_C1.raw	LTQ Orbitrap Elite (VE1)	WT	RPMI modified	early stationary	1	1	whole cell extract	1	1D-Gel separation	-
005	150401_VE1_PM1_JHo_Pneu_intra_Gel_C2.raw	LTQ Orbitrap Elite (VE1)	WT	RPMI modified	early stationary	1	1	whole cell extract	2	1D-Gel separation	-
005	150401_VE1_PM1_JHo_Pneu_intra_Gel_C3.raw	LTQ Orbitrap Elite (VE1)	WT	RPMI modified	early stationary	1	1	whole cell extract	3	1D-Gel separation	-
005	150401_VE1_PM1_JHo_Pneu_intra_Gel_C4.raw	LTQ Orbitrap Elite (VE1)	WT	RPMI modified	early stationary	1	1	whole cell extract	4	1D-Gel separation	-
005	150401_VE1_PM1_JHo_Pneu_intra_Gel_C5.raw	LTQ Orbitrap Elite (VE1)	WT	RPMI modified	early stationary	1	1	whole cell extract	5	1D-Gel separation	-
005	150401_VE1_PM1_JHo_Pneu_intra_Gel_C6.raw	LTQ Orbitrap Elite (VE1)	WT	RPMI modified	early stationary	1	1	whole cell extract	6	1D-Gel separation	-
005	150401_VE1_PM1_JHo_Pneu_intra_Gel_C7.raw	LTQ Orbitrap Elite (VE1)	WT	RPMI modified	early stationary	1	1	whole cell extract	7	1D-Gel separation	-
005	150401_VE1_PM1_JHo_Pneu_intra_Gel_C8.raw	LTQ Orbitrap Elite (VE1)	WT	RPMI modified	early stationary	1	1	whole cell extract	8	1D-Gel separation	-
005	150401_VE1_PM1_JHo_Pneu_intra_Gel_C9.raw	LTQ Orbitrap Elite (VE1)	WT	RPMI modified	early stationary	1	1	whole cell extract	9	1D-Gel separation	-
005	150401_VE1_PM1_JHo_Pneu_intra_Gel_C10.raw	LTQ Orbitrap Elite (VE1)	WT	RPMI modified	early stationary	1	1	whole cell extract	10	1D-Gel separation	-
006	160217_OV3_P5_SK_JHo_BIP_K1_01.raw	LTQ Orbitrap Velos Pro (OV3)	WT	RPMI modified	early stationary	1	1	whole cell extract	1	In solution digest	internal SILAC standard - Lys C13N15, Arg C13N15
006	160217_OV3_P5_SK_JHo_BIP_K1_02.raw	LTQ Orbitrap Velos Pro (OV3)	WT	RPMI modified	early stationary	1	2	whole cell extract	1	In solution digest	internal SILAC standard - Lys C13N15, Arg C13N16
006	160217_OV3_P5_SK_JHo_BIP_K1_03.raw	LTQ Orbitrap Velos Pro (OV3)	WT	RPMI modified	early stationary	1	3	whole cell extract	1	In solution digest	internal SILAC standard - Lys C13N15, Arg C13N17
006	160217_OV3_P5_SK_JHo_BIP_K2_01.raw	LTQ Orbitrap Velos Pro (OV3)	WT	RPMI modified	early stationary	2	1	whole cell extract	1	In solution digest	internal SILAC standard - Lys C13N15, Arg C13N18
006	160217_OV3_P5_SK_JHo_BIP_K2_02.raw	LTQ Orbitrap Velos Pro (OV3)	WT	RPMI modified	early stationary	2	2	whole cell extract	1	In solution digest	internal SILAC standard - Lys C13N15, Arg C13N19
006	160217_OV3_P5_SK_JHo_BIP_K2_03.raw	LTQ Orbitrap Velos Pro (OV3)	WT	RPMI modified	early stationary	2	3	whole cell extract	1	In solution digest	internal SILAC standard - Lys C13N15, Arg C13N20
006	160217_OV3_P5_SK_JHo_BIP_K3_01.raw	LTQ Orbitrap Velos Pro (OV3)	WT	RPMI modified	early stationary	3	1	whole cell extract	1	In solution digest	internal SILAC standard - Lys C13N15, Arg C13N21
006	160217_OV3_P5_SK_JHo_BIP_K3_02.raw	LTQ Orbitrap Velos Pro (OV3)	WT	RPMI modified	early stationary	3	2	whole cell extract	1	In solution digest	internal SILAC standard - Lys C13N15, Arg C13N22
006	160217_OV3_P5_SK_JHo_BIP_K3_03.raw	LTQ Orbitrap Velos Pro (OV3)	WT	RPMI modified	early stationary	3	3	whole cell extract	1	In solution digest	internal SILAC standard - Lys C13N15, Arg C13N23
006	160427_OV3_P5_JHo_BIP_intra_K1_01.raw	LTQ Orbitrap Velos Pro (OV3)	WT	RPMI modified	early stationary	1	1	whole cell extract	1	In solution digest	internal SILAC standard - Lys C13N15, Arg C13N24
006	160427_OV3_P5_JHo_BIP_intra_K1_02.raw	LTQ Orbitrap Velos Pro (OV3)	WT	RPMI modified	early stationary	1	2	whole cell extract	1	In solution digest	internal SILAC standard - Lys C13N15, Arg C13N25
006	160427_OV3_P5_JHo_BIP_intra_K1_03.raw	LTQ Orbitrap Velos Pro (OV3)	WT	RPMI modified	early stationary	1	3	whole cell extract	1	In solution digest	internal SILAC standard - Lys C13N15, Arg C13N26
006	160427_OV3_P5_JHo_BIP_intra_K2_01.raw	LTQ Orbitrap Velos Pro (OV3)	WT	RPMI modified	early stationary	2	1	whole cell extract	1	In solution digest	internal SILAC standard - Lys C13N15, Arg C13N27
006	160427_OV3_P5_JHo_BIP_intra_K2_02.raw	LTQ Orbitrap Velos Pro (OV3)	WT	RPMI modified	early stationary	2	2	whole cell extract	1	In solution digest	internal SILAC standard - Lys C13N15, Arg C13N28
006	160427_OV3_P5_JHo_BIP_intra_K2_03.raw	LTQ Orbitrap Velos Pro (OV3)	WT	RPMI modified	early stationary	2	3	whole cell extract	1	In solution digest	internal SILAC standard - Lys C13N15, Arg C13N29
006	160428_OV3_P5_JHo_BIP_intra_K3_01.raw	LTQ Orbitrap Velos Pro (OV3)	WT	RPMI modified	early stationary	3	1	whole cell extract	1	In solution digest	internal SILAC standard - Lys C13N15, Arg C13N30
006	160428_OV3_P5_JHo_BIP_intra_K3_02.raw	LTQ Orbitrap Velos Pro (OV3)	WT	RPMI modified	early stationary	3	2	whole cell extract	1	In solution digest	internal SILAC standard - Lys C13N15, Arg C13N31
006	160428_OV3_P5_JHo_BIP_intra_K3_03.raw	LTQ Orbitrap Velos Pro (OV3)	WT	RPMI modified	early stationary	3	3	whole cell extract	1	In solution digest	internal SILAC standard - Lys C13N15, Arg C13N32
006	170529_VE1_PM4_JHo_SPD_RPMI_intra_K1_01.raw	LTQ Orbitrap Elite (VE1)	WT	RPMI modified	early stationary	1	1	whole cell extract	1	In solution digest	internal SILAC standard - Lys C13N15, Arg C13N33
006	170529_VE1_PM4_JHo_SPD_RPMI_intra_K1_02.raw	LTQ Orbitrap Elite (VE1)	WT	RPMI modified	early stationary	1	2	whole cell extract	1	In solution digest	internal SILAC standard - Lys C13N15, Arg C13N34
006	170529_VE1_PM4_JHo_SPD_RPMI_intra_K1_03.raw	LTQ Orbitrap Elite (VE1)	WT	RPMI modified	early stationary	1	3	whole cell extract	1	In solution digest	internal SILAC standard - Lys C13N15, Arg C13N35
006	170529_VE1_PM4_JHo_SPD_RPMI_intra_K2_01.raw	LTQ Orbitrap Elite (VE1)	WT	RPMI modified	early stationary	2	1	whole cell extract	1	In solution digest	internal SILAC standard - Lys C13N15, Arg C13N36
006	170529_VE1_PM4_JHo_SPD_RPMI_intra_K2_02.raw	LTQ Orbitrap Elite (VE1)	WT	RPMI modified	early stationary	2	2	whole cell extract	1	In solution digest	internal SILAC standard - Lys C13N15, Arg C13N37
006	170529_VE1_PM4_JHo_SPD_RPMI_intra_K2_03.raw	LTQ Orbitrap Elite (VE1)	WT	RPMI modified	early stationary	2	3	whole cell extract	1	In solution digest	internal SILAC standard - Lys C13N15, Arg C13N38
006	170529_VE1_PM4_JHo_SPD_RPMI_intra_K3_01.raw	LTQ Orbitrap Elite (VE1)	WT	RPMI modified	early stationary	3	1	whole cell extract	1	In solution digest	internal SILAC standard - Lys C13N15, Arg C13N39
006	170529_VE1_PM4_JHo_SPD_RPMI_intra_K3_02.raw	LTQ Orbitrap Elite (VE1)	WT	RPMI modified	early stationary	3	2	whole cell extract	1	In solution digest	internal SILAC standard - Lys C13N15, Arg C13N40
006	170529_VE1_PM4_JHo_SPD_RPMI_intra_K3_03.raw	LTQ Orbitrap Elite (VE1)	WT	RPMI modified	early stationary	3	3	whole cell extract	1	In solution digest	internal SILAC standard - Lys C13N15, Arg C13N41
007	160219_OV3_P5_SK_JHo_BIP_B1_01.raw	LTQ Orbitrap Velos Pro (OV3)	WT	RPMI modified	early stationary	1	1	whole cell extract	1	bipyridine (BIP) stress induced, In solution digest	internal SILAC standard - Lys C13N15, Arg C13N42
007	160219_OV3_P5_SK_JHo_BIP_B1_02.raw	LTQ Orbitrap Velos Pro (OV3)	WT	RPMI modified	early stationary	1	2	whole cell extract	1	bipyridine (BIP) stress induced, In solution digest	internal SILAC standard - Lys C13N15, Arg C13N43
007	160219_OV3_P5_SK_JHo_BIP_B1_03.raw	LTQ Orbitrap Velos Pro (OV3)	WT	RPMI modified	early stationary	1	3	whole cell extract	1	bipyridine (BIP) stress induced, In solution digest	internal SILAC standard - Lys C13N15, Arg C13N44
007	160219_OV3_P5_SK_JHo_BIP_B2_01.raw	LTQ Orbitrap Velos Pro (OV3)	WT	RPMI modified	early stationary	2	1	whole cell extract	1	bipyridine (BIP) stress induced, In solution digest	internal SILAC standard - Lys C13N15, Arg C13N45
007	160219_OV3_P5_SK_JHo_BIP_B2_02.raw	LTQ Orbitrap Velos Pro (OV3)	WT	RPMI modified	early stationary	2	2	whole cell extract	1	bipyridine (BIP) stress induced, In solution digest	internal SILAC standard - Lys C13N15, Arg C13N46
007	160219_OV3_P5_SK_JHo_BIP_B2_03.raw	LTQ Orbitrap Velos Pro (OV3)	WT	RPMI modified	early stationary	2	3	whole cell extract	1	bipyridine (BIP) stress induced, In solution digest	internal SILAC standard - Lys C13N15, Arg C13N47
007	160219_OV3_P5_SK_JHo_BIP_B3_01.raw	LTQ Orbitrap Velos Pro (OV3)	WT	RPMI modified	early stationary	3	1	whole cell extract	1	bipyridine (BIP) stress induced, In solution digest	internal SILAC standard - Lys C13N15, Arg C13N48
007	160219_OV3_P5_SK_JHo_BIP_B3_02.raw	LTQ Orbitrap Velos Pro (OV3)	WT	RPMI modified	early stationary	3	2	whole cell extract	1	bipyridine (BIP) stress induced, In solution digest	internal SILAC standard - Lys C13N15, Arg C13N49
007	160219_OV3_P5_SK_JHo_BIP_B3_03.raw	LTQ Orbitrap Velos Pro (OV3)	WT	RPMI modified	early stationary	3	3	whole cell extract	1	bipyridine (BIP) stress induced, In solution digest	internal SILAC standard - Lys C13N15, Arg C13N50
007	160428_OV3_P5_JHo_BIP_intra_B4_01.raw	LTQ Orbitrap Velos Pro (OV3)	WT	RPMI modified	early stationary	4	1	whole cell extract	1	bipyridine (BIP) stress induced, In solution digest	internal SILAC standard - Lys C13N15, Arg C13N51
007	160428_OV3_P5_JHo_BIP_intra_B4_02.raw	LTQ Orbitrap Velos Pro (OV3)	WT	RPMI modified	early stationary	4	2	whole cell extract	1	bipyridine (BIP) stress induced, In solution digest	internal SILAC standard - Lys C13N15, Arg C13N52
007	160428_OV3_P5_JHo_BIP_intra_B4_03.raw	LTQ Orbitrap Velos Pro (OV3)	WT	RPMI modified	early stationary	4	3	whole cell extract	1	bipyridine (BIP) stress induced, In solution digest	internal SILAC standard - Lys C13N15, Arg C13N53
008	161214_OV3_P5_JHo_BIP_intra_Complex_1_01.raw	LTQ Orbitrap Velos Pro (OV3)	WT	RPMI modified	early stationary	1	1	whole cell extract	1	BIP-iron(II)-complex treatment, In solution digest	internal SILAC standard - Lys C13N15, Arg C13N54
008	161214_OV3_P5_JHo_BIP_intra_Complex_1_02.raw	LTQ Orbitrap Velos Pro (OV3)	WT	RPMI modified	early stationary	1	2	whole cell extract	1	BIP-iron(II)-complex treatment, In solution digest	internal SILAC standard - Lys C13N15, Arg C13N55
008	161214_OV3_P5_JHo_BIP_intra_Complex_1_03.raw	LTQ Orbitrap Velos Pro (OV3)	WT	RPMI modified	early stationary	1	3	whole cell extract	1	BIP-iron(II)-complex treatment, In solution digest	internal SILAC standard - Lys C13N15, Arg C13N56
008	161214_OV3_P5_JHo_BIP_intra_Complex_2_01.raw	LTQ Orbitrap Velos Pro (OV3)	WT	RPMI modified	early stationary	2	1	whole cell extract	1	BIP-iron(II)-complex treatment, In solution digest	internal SILAC standard - Lys C13N15, Arg C13N57
008	161214_OV3_P5_JHo_BIP_intra_Complex_2_02.raw	LTQ Orbitrap Velos Pro (OV3)	WT	RPMI modified	early stationary	2	2	whole cell extract	1	BIP-iron(II)-complex treatment, In solution digest	internal SILAC standard - Lys C13N15, Arg C13N58
008	161214_OV3_P5_JHo_BIP_intra_Complex_2_03.raw	LTQ Orbitrap Velos Pro (OV3)	WT	RPMI modified	early stationary	2	3	whole cell extract	1	BIP-iron(II)-complex treatment, In solution digest	internal SILAC standard - Lys C13N15, Arg C13N59
008	161214_OV3_P5_JHo_BIP_intra_Complex_3_01.raw	LTQ Orbitrap Velos Pro (OV3)	WT	RPMI modified	early stationary	3	1	whole cell extract	1	BIP-iron(II)-complex treatment, In solution digest	internal SILAC standard - Lys C13N15, Arg C13N60
008	161214_OV3_P5_JHo_BIP_intra_Complex_3_02.raw	LTQ Orbitrap Velos Pro (OV3)	WT	RPMI modified	early stationary	3	2	whole cell extract	1	BIP-iron(II)-complex treatment, In solution digest	internal SILAC standard - Lys C13N15, Arg C13N61
008	161214_OV3_P5_JHo_BIP_intra_Complex_3_03.raw	LTQ Orbitrap Velos Pro (OV3)	WT	RPMI modified	early stationary	3	3	whole cell extract	1	BIP-iron(II)-complex treatment, In solution digest	internal SILAC standard - Lys C13N15, Arg C13N62
009	160221_OV3_P5_SK_JHo_BIP_extra_K1_01.raw	LTQ Orbitrap Velos Pro (OV3)	WT	RPMI modified	early stationary	1	1	supernatant from cell culture	1	Affinity bead-based protein enrichment, In solution digest	internal SILAC standard - Lys C13N15, Arg C13N63
009	160221_OV3_P5_SK_JHo_BIP_extra_K1_02.raw	LTQ Orbitrap Velos Pro (OV3)	WT	RPMI modified	early stationary	1	2	supernatant from cell culture	1	Affinity bead-based protein enrichment, In solution digest	internal SILAC standard - Lys C13N15, Arg C13N64
009	160221_OV3_P5_SK_JHo_BIP_extra_K1_03.raw	LTQ Orbitrap Velos Pro (OV3)	WT	RPMI modified	early stationary	1	3	supernatant from cell culture	1	Affinity bead-based protein enrichment, In solution digest	internal SILAC standard - Lys C13N15, Arg C13N65
009	160221_OV3_P5_SK_JHo_BIP_extra_K2_01.raw	LTQ Orbitrap Velos Pro (OV3)	WT	RPMI modified	early stationary	2	1	supernatant from cell culture	1	Affinity bead-based protein enrichment, In solution digest	internal SILAC standard - Lys C13N15, Arg C13N66
009	160221_OV3_P5_SK_JHo_BIP_extra_K2_02.raw	LTQ Orbitrap Velos Pro (OV3)	WT	RPMI modified	early stationary	2	2	supernatant from cell culture	1	Affinity bead-based protein enrichment, In solution digest	internal SILAC standard - Lys C13N15, Arg C13N67
009	160221_OV3_P5_SK_JHo_BIP_extra_K2_03.raw	LTQ Orbitrap Velos Pro (OV3)	WT	RPMI modified	early stationary	2	3	supernatant from cell culture	1	Affinity bead-based protein enrichment, In solution digest	internal SILAC standard - Lys C13N15, Arg C13N68
009	160221_OV3_P5_SK_JHo_BIP_extra_K3_01.raw	LTQ Orbitrap Velos Pro (OV3)	WT	RPMI modified	early stationary	3	1	supernatant from cell culture	1	Affinity bead-based protein enrichment, In solution digest	internal SILAC standard - Lys C13N15, Arg C13N69
009	160223_OV3_P5_SK_JHo_BIP_extra_K3_02.raw	LTQ Orbitrap Velos Pro (OV3)	WT	RPMI modified	early stationary	3	2	supernatant from cell culture	1	Affinity bead-based protein enrichment, In solution digest	internal SILAC standard - Lys C13N15, Arg C13N70
009	160223_OV3_P5_SK_JHo_BIP_extra_K3_03.raw	LTQ Orbitrap Velos Pro (OV3)	WT	RPMI modified	early stationary	3	3	supernatant from cell culture	1	Affinity bead-based protein enrichment, In solution digest	internal SILAC standard - Lys C13N15, Arg C13N71
009	160222_OV3_P5_SK_JHo_BIP_extra_K1_01.raw	LTQ Orbitrap Velos Pro (OV3)	WT	RPMI modified	early stationary	1	1	supernatant from cell culture	1	Affinity bead-based protein enrichment, In solution digest	internal SILAC standard - Lys C13N15, Arg C13N72
009	160222_OV3_P5_SK_JHo_BIP_extra_K1_02.raw	LTQ Orbitrap Velos Pro (OV3)	WT	RPMI modified	early stationary	1	2	supernatant from cell culture	1	Affinity bead-based protein enrichment, In solution digest	internal SILAC standard - Lys C13N15, Arg C13N73
009	160222_OV3_P5_SK_JHo_BIP_extra_K1_03.raw	LTQ Orbitrap Velos Pro (OV3)	WT	RPMI modified	early stationary	1	3	supernatant from cell culture	1	Affinity bead-based protein enrichment, In solution digest	internal SILAC standard - Lys C13N15, Arg C13N74
009	160222_OV3_P5_SK_JHo_BIP_extra_K2_01.raw	LTQ Orbitrap Velos Pro (OV3)	WT	RPMI modified	early stationary	2	1	supernatant from cell culture	1	Affinity bead-based protein enrichment, In solution digest	internal SILAC standard - Lys C13N15, Arg C13N75
009	160222_OV3_P5_SK_JHo_BIP_extra_K2_02.raw	LTQ Orbitrap Velos Pro (OV3)	WT	RPMI modified	early stationary	2	2	supernatant from cell culture	1	Affinity bead-based protein enrichment, In solution digest	internal SILAC standard - Lys C13N15, Arg C13N76
009	160222_OV3_P5_SK_JHo_BIP_extra_K2_03.raw	LTQ Orbitrap Velos Pro (OV3)	WT	RPMI modified	early stationary	2	3	supernatant from cell culture	1	Affinity bead-based protein enrichment, In solution digest	internal SILAC standard - Lys C13N15, Arg C13N77
009	160629_OV3_P5_JHo_BIP_extra_K1_01.raw	LTQ Orbitrap Velos Pro (OV3)	WT	RPMI modified	early stationary	1	1	supernatant from cell culture	1	Affinity bead-based protein enrichment, In solution digest	internal SILAC standard - Lys C13N15, Arg C13N78
009	160629_OV3_P5_JHo_BIP_extra_K1_02.raw	LTQ Orbitrap Velos Pro (OV3)	WT	RPMI modified	early stationary	1	2	supernatant from cell culture	1	Affinity bead-based protein enrichment, In solution digest	internal SILAC standard - Lys C13N15, Arg C13N79
009	160629_OV3_P5_JHo_BIP_extra_K1_03.raw	LTQ Orbitrap Velos Pro (OV3)	WT	RPMI modified	early stationary	1	3	supernatant from cell culture	1	Affinity bead-based protein enrichment, In solution digest	internal SILAC standard - Lys C13N15, Arg C13N80
009	160629_OV3_P5_JHo_BIP_extra_K2_01.raw	LTQ Orbitrap Velos Pro (OV3)	WT	RPMI modified	early stationary	2	1	supernatant from cell culture	1	Affinity bead-based protein enrichment, In solution digest	internal SILAC standard - Lys C13N15, Arg C13N81
009	160629_OV3_P5_JHo_BIP_extra_K2_02.raw	LTQ Orbitrap Velos Pro (OV3)	WT	RPMI modified	early stationary	2	2	supernatant from cell culture	1	Affinity bead-based protein enrichment, In solution digest	internal SILAC standard - Lys C13N15, Arg C13N82
009	160629_OV3_P5_JHo_BIP_extra_K2_03.raw	LTQ Orbitrap Velos Pro (OV3)	WT	RPMI modified	early stationary	2	3	supernatant from cell culture	1	Affinity bead-based protein enrichment, In solution digest	internal SILAC standard - Lys C13N15, Arg C13N83
009	160629_OV3_P5_JHo_BIP_extra_K3_01.raw	LTQ Orbitrap Velos Pro (OV3)	WT	RPMI modified	early stationary	3	1	supernatant from cell culture	1	Affinity bead-based protein enrichment, In solution digest	internal SILAC standard - Lys C13N15, Arg C13N84
009	160629_OV3_P5_JHo_BIP_extra_K3_02.raw	LTQ Orbitrap Velos Pro (OV3)	WT	RPMI modified	early stationary	3	2	supernatant from cell culture	1	Affinity bead-based protein enrichment, In solution digest	internal SILAC standard - Lys C13N15, Arg C13N85
009	160629_OV3_P5_JHo_BIP_extra_K3_03.raw	LTQ Orbitrap Velos Pro (OV3)	WT	RPMI modified	early stationary	3	3	supernatant from cell culture	1	Affinity bead-based protein enrichment, In solution digest	internal SILAC standard - Lys C13N15, Arg C13N86
010	160223_OV3_P5_SK_JHo_BIP_extra_B1_01.raw	LTQ Orbitrap Velos Pro (OV3)	WT	RPMI modified	early stationary	1	1	supernatant from cell culture	1	bipyridine (BIP) stress induced, Affinity bead-based protein enrichment, In solution digest	internal SILAC standard - Lys C13N15, Arg C13N87
010	160223_OV3_P5_SK_JHo_BIP_extra_B1_02.raw	LTQ Orbitrap Velos Pro (OV3)	WT	RPMI modified	early stationary	1	2	supernatant from cell culture	1	bipyridine (BIP) stress induced, Affinity bead-based protein enrichment, In solution digest	internal SILAC standard - Lys C13N15, Arg C13N88
010	160223_OV3_P5_SK_JHo_BIP_extra_B1_03.raw	LTQ Orbitrap Velos Pro (OV3)	WT	RPMI modified	early stationary	1	3	supernatant from cell culture	1	bipyridine (BIP) stress induced, Affinity bead-based protein enrichment, In solution digest	internal SILAC standard - Lys C13N15, Arg C13N89
010	160223_OV3_P5_SK_JHo_BIP_extra_B2_01.raw	LTQ Orbitrap Velos Pro (OV3)	WT	RPMI modified	early stationary	2	1	supernatant from cell culture	1	bipyridine (BIP) stress induced, Affinity bead-based protein enrichment, In solution digest	internal SILAC standard - Lys C13N15, Arg C13N90
010	160223_OV3_P5_SK_JHo_BIP_extra_B2_02.raw	LTQ Orbitrap Velos Pro (OV3)	WT	RPMI modified	early stationary	2	2	supernatant from cell culture	1	bipyridine (BIP) stress induced, Affinity bead-based protein enrichment, In solution digest	internal SILAC standard - Lys C13N15, Arg C13N91
010	160223_OV3_P5_SK_JHo_BIP_extra_B2_03.raw	LTQ Orbitrap Velos Pro (OV3)	WT	RPMI modified	early stationary	2	3	supernatant from cell culture	1	bipyridine (BIP) stress induced, Affinity bead-based protein enrichment, In solution digest	internal SILAC standard - Lys C13N15, Arg C13N92
010	160313_OV3_P5_SK_JHo_BIP_extra_B3_01.raw	LTQ Orbitrap Velos Pro (OV3)	WT	RPMI modified	early stationary	3	1	supernatant from cell culture	1	bipyridine (BIP) stress induced, Affinity bead-based protein enrichment, In solution digest	internal SILAC standard - Lys C13N15, Arg C13N93
010	160313_OV3_P5_SK_JHo_BIP_extra_B3_02.raw	LTQ Orbitrap Velos Pro (OV3)	WT	RPMI modified	early stationary	3	2	supernatant from cell culture	1	bipyridine (BIP) stress induced, Affinity bead-based protein enrichment, In solution digest	internal SILAC standard - Lys C13N15, Arg C13N94
010	160313_OV3_P5_SK_JHo_BIP_extra_B3_03.raw	LTQ Orbitrap Velos Pro (OV3)	WT	RPMI modified	early stationary	3	3	supernatant from cell culture	1	bipyridine (BIP) stress induced, Affinity bead-based protein enrichment, In solution digest	internal SILAC standard - Lys C13N15, Arg C13N95
010	160301_OV3_P2_SK_JHo_BIP_extra_B3_01.raw	LTQ Orbitrap Velos Pro (OV3)	WT	RPMI modified	early stationary	3	1	supernatant from cell culture	1	bipyridine (BIP) stress induced, Affinity bead-based protein enrichment, In solution digest	internal SILAC standard - Lys C13N15, Arg C13N96
010	160301_OV3_P2_SK_JHo_BIP_extra_B3_02.raw	LTQ Orbitrap Velos Pro (OV3)	WT	RPMI modified	early stationary	3	2	supernatant from cell culture	1	bipyridine (BIP) stress induced, Affinity bead-based protein enrichment, In solution digest	internal SILAC standard - Lys C13N15, Arg C13N97
010	160301_OV3_P2_SK_JHo_BIP_extra_B3_03.raw	LTQ Orbitrap Velos Pro (OV3)	WT	RPMI modified	early stationary	3	3	supernatant from cell culture	1	bipyridine (BIP) stress induced, Affinity bead-based protein enrichment, In solution digest	internal SILAC standard - Lys C13N15, Arg C13N98
010	160629_OV3_P5_JHo_BIP_extra_B4_01.raw	LTQ Orbitrap Velos Pro (OV3)	WT	RPMI modified	early stationary	4	1	supernatant from cell culture	1	bipyridine (BIP) stress induced, Affinity bead-based protein enrichment, In solution digest	internal SILAC standard - Lys C13N15, Arg C13N99
010	160629_OV3_P5_JHo_BIP_extra_B4_02.raw	LTQ Orbitrap Velos Pro (OV3)	WT	RPMI modified	early stationary	4	2	supernatant from cell culture	1	bipyridine (BIP) stress induced, Affinity bead-based protein enrichment, In solution digest	internal SILAC standard - Lys C13N15, Arg C13N100
010	160629_OV3_P5_JHo_BIP_extra_B4_03.raw	LTQ Orbitrap Velos Pro (OV3)	WT	RPMI modified	early stationary	4	3	supernatant from cell culture	1	bipyridine (BIP) stress induced, Affinity bead-based protein enrichment, In solution digest	internal SILAC standard - Lys C13N15, Arg C13N101
011	161216_OV3_P5_JHo_BIP_extra_Complex_1_01.raw	LTQ Orbitrap Velos Pro (OV3)	WT	RPMI modified	early stationary	1	1	supernatant from cell culture	1	BIP-iron(II)-complex treatment, Affinity bead-based protein enrichment, In solution digest	internal SILAC standard - Lys C13N15, Arg C13N102
011	161216_OV3_P5_JHo_BIP_extra_Complex_1_02.raw	LTQ Orbitrap Velos Pro (OV3)	WT	RPMI modified	early stationary	1	2	supernatant from cell culture	1	BIP-iron(II)-complex treatment, Affinity bead-based protein enrichment, In solution digest	internal SILAC standard - Lys C13N15, Arg C13N103
011	161216_OV3_P5_JHo_BIP_extra_Complex_1_03.raw	LTQ Orbitrap Velos Pro (OV3)	WT	RPMI modified	early stationary	1	3	supernatant from cell culture	1	BIP-iron(II)-complex treatment, Affinity bead-based protein enrichment, In solution digest	internal SILAC standard - Lys C13N15, Arg C13N104
011	161216_OV3_P5_JHo_BIP_extra_Complex_2_01.raw	LTQ Orbitrap Velos Pro (OV3)	WT	RPMI modified	early stationary	2	1	supernatant from cell culture	1	BIP-iron(II)-complex treatment, Affinity bead-based protein enrichment, In solution digest	internal SILAC standard - Lys C13N15, Arg C13N105
011	161216_OV3_P5_JHo_BIP_extra_Complex_2_02.raw	LTQ Orbitrap Velos Pro (OV3)	WT	RPMI modified	early stationary	2	2	supernatant from cell culture	1	BIP-iron(II)-complex treatment, Affinity bead-based protein enrichment, In solution digest	internal SILAC standard - Lys C13N15, Arg C13N106
011	161216_OV3_P5_JHo_BIP_extra_Complex_2_03.raw	LTQ Orbitrap Velos Pro (OV3)	WT	RPMI modified	early stationary	2	3	supernatant from cell culture	1	BIP-iron(II)-complex treatment, Affinity bead-based protein enrichment, In solution digest	internal SILAC standard - Lys C13N15, Arg C13N107
011	161222_OV3_P5_JHo_BIP_extra_Complex_2_04.raw	LTQ Orbitrap Velos Pro (OV3)	WT	RPMI modified	early stationary	2	4	supernatant from cell culture	1	BIP-iron(II)-complex treatment, Affinity bead-based protein enrichment, In solution digest	internal SILAC standard - Lys C13N15, Arg C13N108
011	161216_OV3_P5_JHo_BIP_extra_Complex_3_01.raw	LTQ Orbitrap Velos Pro (OV3)	WT	RPMI modified	early stationary	3	1	supernatant from cell culture	1	BIP-iron(II)-complex treatment, Affinity bead-based protein enrichment, In solution digest	internal SILAC standard - Lys C13N15, Arg C13N109
011	161216_OV3_P5_JHo_BIP_extra_Complex_3_02.raw	LTQ Orbitrap Velos Pro (OV3)	WT	RPMI modified	early stationary	3	2	supernatant from cell culture	1	BIP-iron(II)-complex treatment, Affinity bead-based protein enrichment, In solution digest	internal SILAC standard - Lys C13N15, Arg C13N110
011	161216_OV3_P5_JHo_BIP_extra_Complex_3_03.raw	LTQ Orbitrap Velos Pro (OV3)	WT	RPMI modified	early stationary	3	3	supernatant from cell culture	1	BIP-iron(II)-complex treatment, Affinity bead-based protein enrichment, In solution digest	internal SILAC standard - Lys C13N15, Arg C13N111
012	170317_VE1_PM4_ThS_JHo_THY_hStd_intra_K1_01.raw	LTQ Orbitrap Elite (VE1)	WT	THY	early stationary	1	1	whole cell extract	1	In solution digest	internal SILAC standard - Lys C13N15, Arg C13N112
012	170317_VE1_PM4_ThS_JHo_THY_hStd_intra_K1_02.raw	LTQ Orbitrap Elite (VE1)	WT	THY	early stationary	1	2	whole cell extract	1	In solution digest	internal SILAC standard - Lys C13N15, Arg C13N113
012	170317_VE1_PM4_ThS_JHo_THY_hStd_intra_K1_03.raw	LTQ Orbitrap Elite (VE1)	WT	THY	early stationary	1	3	whole cell extract	1	In solution digest	internal SILAC standard - Lys C13N15, Arg C13N114
012	170318_VE1_PM4_ThS_JHo_THY_hStd_intra_K2_01.raw	LTQ Orbitrap Elite (VE1)	WT	THY	early stationary	2	1	whole cell extract	1	In solution digest	internal SILAC standard - Lys C13N15, Arg C13N115
012	170318_VE1_PM4_ThS_JHo_THY_hStd_intra_K2_02.raw	LTQ Orbitrap Elite (VE1)	WT	THY	early stationary	2	2	whole cell extract	1	In solution digest	internal SILAC standard - Lys C13N15, Arg C13N116
012	170318_VE1_PM4_ThS_JHo_THY_hStd_intra_K2_03.raw	LTQ Orbitrap Elite (VE1)	WT	THY	early stationary	2	3	whole cell extract	1	In solution digest	internal SILAC standard - Lys C13N15, Arg C13N117
012	170318_VE1_PM4_ThS_JHo_THY_hStd_intra_K3_01.raw	LTQ Orbitrap Elite (VE1)	WT	THY	early stationary	3	1	whole cell extract	1	In solution digest	internal SILAC standard - Lys C13N15, Arg C13N118
012	170318_VE1_PM4_ThS_JHo_THY_hStd_intra_K3_02.raw	LTQ Orbitrap Elite (VE1)	WT	THY	early stationary	3	2	whole cell extract	1	In solution digest	internal SILAC standard - Lys C13N15, Arg C13N119
012	170318_VE1_PM4_ThS_JHo_THY_hStd_intra_K3_03.raw	LTQ Orbitrap Elite (VE1)	WT	THY	early stationary	3	3	whole cell extract	1	In solution digest	internal SILAC standard - Lys C13N15, Arg C13N120
012	170427_VE1_PM4_ThS_JHo_SPD_THY_intra_K1_01.raw	LTQ Orbitrap Elite (VE1)	WT	THY	early stationary	1	1	whole cell extract	1	In solution digest	-
012	170427_VE1_PM4_ThS_JHo_SPD_THY_intra_K1_02.raw	LTQ Orbitrap Elite (VE1)	WT	THY	early stationary	1	2	whole cell extract	1	In solution digest	-
012	170427_VE1_PM4_ThS_JHo_SPD_THY_intra_K1_03.raw	LTQ Orbitrap Elite (VE1)	WT	THY	early stationary	1	3	whole cell extract	1	In solution digest	-
012	170427_VE1_PM4_ThS_JHo_SPD_THY_intra_K2_01.raw	LTQ Orbitrap Elite (VE1)	WT	THY	early stationary	2	1	whole cell extract	1	In solution digest	-
012	170427_VE1_PM4_ThS_JHo_SPD_THY_intra_K2_02.raw	LTQ Orbitrap Elite (VE1)	WT	THY	early stationary	2	2	whole cell extract	1	In solution digest	-
012	170427_VE1_PM4_ThS_JHo_SPD_THY_intra_K2_03.raw	LTQ Orbitrap Elite (VE1)	WT	THY	early stationary	2	3	whole cell extract	1	In solution digest	-
012	170428_VE1_PM4_ThS_JHo_SPD_THY_intra_K3_01.raw	LTQ Orbitrap Elite (VE1)	WT	THY	early stationary	3	1	whole cell extract	1	In solution digest	-
012	170428_VE1_PM4_ThS_JHo_SPD_THY_intra_K3_02.raw	LTQ Orbitrap Elite (VE1)	WT	THY	early stationary	3	2	whole cell extract	1	In solution digest	-
012	170428_VE1_PM4_ThS_JHo_SPD_THY_intra_K3_03.raw	LTQ Orbitrap Elite (VE1)	WT	THY	early stationary	3	3	whole cell extract	1	In solution digest	-
012	170211_OV3_P5_JHo_THY_intra_K1.raw	LTQ Orbitrap Velos Pro (OV3)	WT	THY	early stationary	1	1	whole cell extract	1	In solution digest	-
012	170211_OV3_P5_JHo_THY_intra_K2.raw	LTQ Orbitrap Velos Pro (OV3)	WT	THY	early stationary	2	1	whole cell extract	1	In solution digest	-
012	170211_OV3_P5_JHo_THY_intra_K3.raw	LTQ Orbitrap Velos Pro (OV3)	WT	THY	early stationary	3	1	whole cell extract	1	In solution digest	-
013	170212_OV3_P5_JHo_THY_intra_BI1.raw	LTQ Orbitrap Velos Pro (OV3)	WT	THY	early stationary	1	1	whole cell extract	1	bipyridine (BIP) stress induced, In solution digest	-
013	170212_OV3_P5_JHo_THY_intra_BI2.raw	LTQ Orbitrap Velos Pro (OV3)	WT	THY	early stationary	1	2	whole cell extract	1	bipyridine (BIP) stress induced, In solution digest	-
013	170212_OV3_P5_JHo_THY_intra_BI3.raw	LTQ Orbitrap Velos Pro (OV3)	WT	THY	early stationary	1	3	whole cell extract	1	bipyridine (BIP) stress induced, In solution digest	-
013	170216_OV3_P5_JHo_THY_intra_BII1.raw	LTQ Orbitrap Velos Pro (OV3)	WT	THY	early stationary	2	1	whole cell extract	1	bipyridine (BIP) stress induced, In solution digest	-
013	170216_OV3_P5_JHo_THY_intra_BII2.raw	LTQ Orbitrap Velos Pro (OV3)	WT	THY	early stationary	2	2	whole cell extract	1	bipyridine (BIP) stress induced, In solution digest	-
013	170216_OV3_P5_JHo_THY_intra_BII3.raw	LTQ Orbitrap Velos Pro (OV3)	WT	THY	early stationary	2	3	whole cell extract	1	bipyridine (BIP) stress induced, In solution digest	-
013	170429_VE1_PM4_ThS_JHo_SPD_THY_intra_B_II_1_01.raw	LTQ Orbitrap Elite (VE1)	WT	THY	early stationary	1	1	whole cell extract	1	bipyridine (BIP) stress induced, In solution digest	-
013	170429_VE1_PM4_ThS_JHo_SPD_THY_intra_B_II_1_02.raw	LTQ Orbitrap Elite (VE1)	WT	THY	early stationary	1	2	whole cell extract	1	bipyridine (BIP) stress induced, In solution digest	-
013	170429_VE1_PM4_ThS_JHo_SPD_THY_intra_B_II_1_03.raw	LTQ Orbitrap Elite (VE1)	WT	THY	early stationary	1	3	whole cell extract	1	bipyridine (BIP) stress induced, In solution digest	-
013	170429_VE1_PM4_ThS_JHo_SPD_THY_intra_B_II_2_01.raw	LTQ Orbitrap Elite (VE1)	WT	THY	early stationary	2	1	whole cell extract	1	bipyridine (BIP) stress induced, In solution digest	-
013	170429_VE1_PM4_ThS_JHo_SPD_THY_intra_B_II_2_02.raw	LTQ Orbitrap Elite (VE1)	WT	THY	early stationary	2	2	whole cell extract	1	bipyridine (BIP) stress induced, In solution digest	-
013	170429_VE1_PM4_ThS_JHo_SPD_THY_intra_B_II_2_03.raw	LTQ Orbitrap Elite (VE1)	WT	THY	early stationary	2	3	whole cell extract	1	bipyridine (BIP) stress induced, In solution digest	-
013	170429_VE1_PM4_ThS_JHo_SPD_THY_intra_B_II_3_01.raw	LTQ Orbitrap Elite (VE1)	WT	THY	early stationary	3	1	whole cell extract	1	bipyridine (BIP) stress induced, In solution digest	-
013	170429_VE1_PM4_ThS_JHo_SPD_THY_intra_B_II_3_02.raw	LTQ Orbitrap Elite (VE1)	WT	THY	early stationary	3	2	whole cell extract	1	bipyridine (BIP) stress induced, In solution digest	-
013	170429_VE1_PM4_ThS_JHo_SPD_THY_intra_B_II_3_03.raw	LTQ Orbitrap Elite (VE1)	WT	THY	early stationary	3	3	whole cell extract	1	bipyridine (BIP) stress induced, In solution digest	-
014	170213_OV3_P5_JHo_THY_intra_CI1.raw	LTQ Orbitrap Velos Pro (OV3)	WT	THY	early stationary	1	1	whole cell extract	1	BIP-iron(II)-complex treatment, In solution digest	-
014	170213_OV3_P5_JHo_THY_intra_CI2.raw	LTQ Orbitrap Velos Pro (OV3)	WT	THY	early stationary	1	2	whole cell extract	1	BIP-iron(II)-complex treatment, In solution digest	-
014	170213_OV3_P5_JHo_THY_intra_CI3.raw	LTQ Orbitrap Velos Pro (OV3)	WT	THY	early stationary	1	3	whole cell extract	1	BIP-iron(II)-complex treatment, In solution digest	-
014	170217_OV3_P5_JHo_THY_intra_CII1.raw	LTQ Orbitrap Velos Pro (OV3)	WT	THY	early stationary	2	1	whole cell extract	1	BIP-iron(II)-complex treatment, In solution digest	-
014	170217_OV3_P5_JHo_THY_intra_CII2.raw	LTQ Orbitrap Velos Pro (OV3)	WT	THY	early stationary	2	2	whole cell extract	1	BIP-iron(II)-complex treatment, In solution digest	-
014	170217_OV3_P5_JHo_THY_intra_CII3.raw	LTQ Orbitrap Velos Pro (OV3)	WT	THY	early stationary	2	3	whole cell extract	1	BIP-iron(II)-complex treatment, In solution digest	-
014	170430_VE1_PM4_ThS_JHo_SPD_THY_intra_C_II_3_01.raw	LTQ Orbitrap Elite (VE1)	WT	THY	early stationary	3	1	whole cell extract	1	BIP-iron(II)-complex treatment, In solution digest	-
014	170430_VE1_PM4_ThS_JHo_SPD_THY_intra_C_II_3_02.raw	LTQ Orbitrap Elite (VE1)	WT	THY	early stationary	3	2	whole cell extract	1	BIP-iron(II)-complex treatment, In solution digest	-
014	170430_VE1_PM4_ThS_JHo_SPD_THY_intra_C_II_3_03.raw	LTQ Orbitrap Elite (VE1)	WT	THY	early stationary	3	3	whole cell extract	1	BIP-iron(II)-complex treatment, In solution digest	-
015	170214_OV3_P5_JHo_THY_extra_K1.raw	LTQ Orbitrap Velos Pro (OV3)	WT	THY	early stationary	1	1	supernatant from cell culture	1	In solution digest	-
015	170214_OV3_P5_JHo_THY_extra_K2.raw	LTQ Orbitrap Velos Pro (OV3)	WT	THY	early stationary	2	1	supernatant from cell culture	1	In solution digest	-
015	170214_OV3_P5_JHo_THY_extra_K3.raw	LTQ Orbitrap Velos Pro (OV3)	WT	THY	early stationary	3	1	supernatant from cell culture	1	In solution digest	-
016	170215_OV3_P5_JHo_THY_extra_BI1.raw	LTQ Orbitrap Velos Pro (OV3)	WT	THY	early stationary	1	1	supernatant from cell culture	1	bipyridine (BIP) stress induced	-
016	170215_OV3_P5_JHo_THY_extra_BI2.raw	LTQ Orbitrap Velos Pro (OV3)	WT	THY	early stationary	2	1	supernatant from cell culture	1	bipyridine (BIP) stress induced	-
016	170215_OV3_P5_JHo_THY_extra_BI3.raw	LTQ Orbitrap Velos Pro (OV3)	WT	THY	early stationary	3	1	supernatant from cell culture	1	bipyridine (BIP) stress induced	-
017	170215_OV3_P5_JHo_THY_extra_CI1.raw	LTQ Orbitrap Velos Pro (OV3)	WT	THY	early stationary	1	1	supernatant from cell culture	1	BIP-iron(II)-complex Sample preparation/Treatment	-
017	170215_OV3_P5_JHo_THY_extra_CI2.raw	LTQ Orbitrap Velos Pro (OV3)	WT	THY	early stationary	2	1	supernatant from cell culture	1	BIP-iron(II)-complex Sample preparation/Treatment	-
017	170215_OV3_P5_JHo_THY_extra_CI3.raw	LTQ Orbitrap Velos Pro (OV3)	WT	THY	early stationary	3	1	supernatant from cell culture	1	BIP-iron(II)-complex Sample preparation/Treatment	-
018	150310_O2_P1_SG_JHo_Pneu_O3_intra_1.raw	LTQ Orbitrap XL (O2)	WT	RPMI modified	stationary	1	1	whole cell extract	1	In solution digest	-
018	150310_O2_P1_SG_JHo_Pneu_O3_intra_2.raw	LTQ Orbitrap XL (O2)	WT	RPMI modified	stationary	2	1	whole cell extract	1	In solution digest	-
018	150310_O2_P1_SG_JHo_Pneu_O3_intra_3.raw	LTQ Orbitrap XL (O2)	WT	RPMI modified	stationary	3	1	whole cell extract	1	In solution digest	-
018	150310_O2_P1_SG_JHo_Pneu_O3_intra_4.raw	LTQ Orbitrap XL (O2)	WT	RPMI modified	stationary	4	1	whole cell extract	1	In solution digest	-
018	150310_O2_P1_SG_JHo_Pneu_O3_intra_5.raw	LTQ Orbitrap XL (O2)	WT	RPMI modified	stationary	5	1	whole cell extract	1	In solution digest	-
019	150311_O2_P1_SG_JHo_Pneu_O3_extra_1.raw	LTQ Orbitrap XL (O2)	WT	RPMI modified	stationary	1	1	supernatant from cell culture	1	Affinity bead-based protein enrichment, In solution digest	-
019	150311_O2_P1_SG_JHo_Pneu_O3_extra_2.raw	LTQ Orbitrap XL (O2)	WT	RPMI modified	stationary	2	1	supernatant from cell culture	1	Affinity bead-based protein enrichment, In solution digest	-
019	150311_O2_P1_SG_JHo_Pneu_O3_extra_3.raw	LTQ Orbitrap XL (O2)	WT	RPMI modified	stationary	3	1	supernatant from cell culture	1	Affinity bead-based protein enrichment, In solution digest	-
019	150311_O2_P1_SG_JHo_Pneu_O3_extra_4.raw	LTQ Orbitrap XL (O2)	WT	RPMI modified	stationary	4	1	supernatant from cell culture	1	Affinity bead-based protein enrichment, In solution digest	-
019	150311_O2_P1_SG_JHo_Pneu_O3_extra_5.raw	LTQ Orbitrap XL (O2)	WT	RPMI modified	stationary	5	1	supernatant from cell culture	1	Affinity bead-based protein enrichment, In solution digest	-
020	150310_O2_P1_SG_JHo_Pneu_O3_intra_+Glc.raw	LTQ Orbitrap XL (O2)	WT	RPMI modified	stationary	1	1	whole cell extract	1	Glucose addtion, In solution digest	-
021	150312_O2_P1_SG_JHo_Pneu_SC_+Glc_extra_1.raw	LTQ Orbitrap XL (O2)	WT	RPMI modified	stationary	1	1	supernatant from cell culture	1	Glucose addtion, In solution digest	-
021	150312_O2_P1_SG_JHo_Pneu_SC_+Glc_extra_2.raw	LTQ Orbitrap XL (O2)	WT	RPMI modified	stationary	2	1	supernatant from cell culture	1	Glucose addtion, In solution digest	-
021	150312_O2_P1_SG_JHo_Pneu_SC_+Glc_extra_3.raw	LTQ Orbitrap XL (O2)	WT	RPMI modified	stationary	3	1	supernatant from cell culture	1	Glucose addtion, In solution digest	-
022	150310_O2_P1_SG_JHo_Pneu_O3_intra_-Glc.raw	LTQ Orbitrap XL (O2)	WT	RPMI modified	stationary	1	1	whole cell extract	1	Glucose limitation, In solution digest	-
023	150312_O2_P1_SG_JHo_Pneu_SC_-Glc_extra_1.raw	LTQ Orbitrap XL (O2)	WT	RPMI modified	stationary	1	1	supernatant from cell culture	1	Glucose limitation, Affinity bead-based protein enrichment, In solution digest	-
023	150312_O2_P1_SG_JHo_Pneu_SC_-Glc_extra_2.raw	LTQ Orbitrap XL (O2)	WT	RPMI modified	stationary	2	1	supernatant from cell culture	1	Glucose limitation, Affinity bead-based protein enrichment, In solution digest	-
023	150312_O2_P1_SG_JHo_Pneu_SC_-Glc_extra_3.raw	LTQ Orbitrap XL (O2)	WT	RPMI modified	stationary	3	1	supernatant from cell culture	1	Glucose limitation, Affinity bead-based protein enrichment, In solution digest	-
024	170531_V2_PM3_CHi_WT_BR1_CID_SCXfrei_1a_Test.raw	LTQ Orbitrap Velos (V2)	WT	RPMI modified	exponential	1	1	whole cell extract, phosphopeptide enriched	1a	In solution digest, TiO enriched phospho peptides, SCX free workflow	internal SILAC standard - Lys C13N15, Arg C13N15
024	170531_V2_PM3_CHi_WT_BR1_CID_SCXfrei_1a.raw	LTQ Orbitrap Velos (V2)	WT	RPMI modified	exponential	1	1	whole cell extract, phosphopeptide enriched	1a	In solution digest, TiO enriched phospho peptides, SCX free workflow	internal SILAC standard - Lys C13N15, Arg C13N16
024	170531_V2_PM3_CHi_WT_BR1_CID_SCXfrei_1b.raw	LTQ Orbitrap Velos (V2)	WT	RPMI modified	exponential	1	1	whole cell extract, phosphopeptide enriched	1b	In solution digest, TiO enriched phospho peptides, SCX free workflow	internal SILAC standard - Lys C13N15, Arg C13N17
024	170531_V2_PM3_CHi_WT_BR1_CID_SCXfrei_1c.raw	LTQ Orbitrap Velos (V2)	WT	RPMI modified	exponential	1	1	whole cell extract, phosphopeptide enriched	1c	In solution digest, TiO enriched phospho peptides, SCX free workflow	internal SILAC standard - Lys C13N15, Arg C13N18
024	170531_V2_PM3_CHi_WT_BR1_CID_SCXfrei_1d.raw	LTQ Orbitrap Velos (V2)	WT	RPMI modified	exponential	1	1	whole cell extract, phosphopeptide enriched	1d	In solution digest, TiO enriched phospho peptides, SCX free workflow	internal SILAC standard - Lys C13N15, Arg C13N19
024	170531_V2_PM3_CHi_WT_BR1_CID_SCXfrei_1e.raw	LTQ Orbitrap Velos (V2)	WT	RPMI modified	exponential	1	1	whole cell extract, phosphopeptide enriched	1e	In solution digest, TiO enriched phospho peptides, SCX free workflow	internal SILAC standard - Lys C13N15, Arg C13N20
024	170531_V2_PM3_CHi_WT_BR1_CID_SCXfrei_2b.raw	LTQ Orbitrap Velos (V2)	WT	RPMI modified	exponential	1	1	whole cell extract, phosphopeptide enriched	2b	In solution digest, TiO enriched phospho peptides, SCX free workflow	internal SILAC standard - Lys C13N15, Arg C13N21
024	170531_V2_PM3_CHi_WT_BR1_CID_SCXfrei_2c.raw	LTQ Orbitrap Velos (V2)	WT	RPMI modified	exponential	1	1	whole cell extract, phosphopeptide enriched	2c	In solution digest, TiO enriched phospho peptides, SCX free workflow	internal SILAC standard - Lys C13N15, Arg C13N22
024	170531_V2_PM3_CHi_WT_BR1_CID_SCXfrei_2de.raw	LTQ Orbitrap Velos (V2)	WT	RPMI modified	exponential	1	1	whole cell extract, phosphopeptide enriched	2de	In solution digest, TiO enriched phospho peptides, SCX free workflow	internal SILAC standard - Lys C13N15, Arg C13N23
024	170601_V2_PM3_CHi_WT_BR2_CID_SCXfrei_1a_Test.raw	LTQ Orbitrap Velos (V2)	WT	RPMI modified	exponential	2	1	whole cell extract, phosphopeptide enriched	1a	In solution digest, TiO enriched phospho peptides, SCX free workflow	internal SILAC standard - Lys C13N15, Arg C13N24
024	170601_V2_PM3_CHi_WT_BR2_CID_SCXfrei_1a.raw	LTQ Orbitrap Velos (V2)	WT	RPMI modified	exponential	2	1	whole cell extract, phosphopeptide enriched	1a	In solution digest, TiO enriched phospho peptides, SCX free workflow	internal SILAC standard - Lys C13N15, Arg C13N25
024	170601_V2_PM3_CHi_WT_BR2_CID_SCXfrei_1b.raw	LTQ Orbitrap Velos (V2)	WT	RPMI modified	exponential	2	1	whole cell extract, phosphopeptide enriched	1b	In solution digest, TiO enriched phospho peptides, SCX free workflow	internal SILAC standard - Lys C13N15, Arg C13N26
024	170601_V2_PM3_CHi_WT_BR2_CID_SCXfrei_1c.raw	LTQ Orbitrap Velos (V2)	WT	RPMI modified	exponential	2	1	whole cell extract, phosphopeptide enriched	1c	In solution digest, TiO enriched phospho peptides, SCX free workflow	internal SILAC standard - Lys C13N15, Arg C13N27
024	170601_V2_PM3_CHi_WT_BR2_CID_SCXfrei_1d.raw	LTQ Orbitrap Velos (V2)	WT	RPMI modified	exponential	2	1	whole cell extract, phosphopeptide enriched	1d	In solution digest, TiO enriched phospho peptides, SCX free workflow	internal SILAC standard - Lys C13N15, Arg C13N28
024	170601_V2_PM3_CHi_WT_BR2_CID_SCXfrei_1e.raw	LTQ Orbitrap Velos (V2)	WT	RPMI modified	exponential	2	1	whole cell extract, phosphopeptide enriched	1e	In solution digest, TiO enriched phospho peptides, SCX free workflow	internal SILAC standard - Lys C13N15, Arg C13N29
024	170601_V2_PM3_CHi_WT_BR2_CID_SCXfrei_2b.raw	LTQ Orbitrap Velos (V2)	WT	RPMI modified	exponential	2	1	whole cell extract, phosphopeptide enriched	2b	In solution digest, TiO enriched phospho peptides, SCX free workflow	internal SILAC standard - Lys C13N15, Arg C13N30
024	170601_V2_PM3_CHi_WT_BR2_CID_SCXfrei_2c.raw	LTQ Orbitrap Velos (V2)	WT	RPMI modified	exponential	2	1	whole cell extract, phosphopeptide enriched	2c	In solution digest, TiO enriched phospho peptides, SCX free workflow	internal SILAC standard - Lys C13N15, Arg C13N31
024	170601_V2_PM3_CHi_WT_BR2_CID_SCXfrei_2de.raw	LTQ Orbitrap Velos (V2)	WT	RPMI modified	exponential	2	1	whole cell extract, phosphopeptide enriched	2de	In solution digest, TiO enriched phospho peptides, SCX free workflow	internal SILAC standard - Lys C13N15, Arg C13N32
024	170606_V2_PM2_CHi_WT_BR3_CID_SCXfrei_1a_Test.raw	LTQ Orbitrap Velos (V2)	WT	RPMI modified	exponential	3	1	whole cell extract, phosphopeptide enriched	1a	In solution digest, TiO enriched phospho peptides, SCX free workflow	internal SILAC standard - Lys C13N15, Arg C13N33
024	170606_V2_PM2_CHi_WT_BR3_CID_SCXfrei_1a.raw	LTQ Orbitrap Velos (V2)	WT	RPMI modified	exponential	3	1	whole cell extract, phosphopeptide enriched	1a	In solution digest, TiO enriched phospho peptides, SCX free workflow	internal SILAC standard - Lys C13N15, Arg C13N34
024	170606_V2_PM2_CHi_WT_BR3_CID_SCXfrei_1b.raw	LTQ Orbitrap Velos (V2)	WT	RPMI modified	exponential	3	1	whole cell extract, phosphopeptide enriched	1b	In solution digest, TiO enriched phospho peptides, SCX free workflow	internal SILAC standard - Lys C13N15, Arg C13N35
024	170606_V2_PM2_CHi_WT_BR3_CID_SCXfrei_1c.raw	LTQ Orbitrap Velos (V2)	WT	RPMI modified	exponential	3	1	whole cell extract, phosphopeptide enriched	1c	In solution digest, TiO enriched phospho peptides, SCX free workflow	internal SILAC standard - Lys C13N15, Arg C13N36
024	170606_V2_PM2_CHi_WT_BR3_CID_SCXfrei_1d.raw	LTQ Orbitrap Velos (V2)	WT	RPMI modified	exponential	3	1	whole cell extract, phosphopeptide enriched	1d	In solution digest, TiO enriched phospho peptides, SCX free workflow	internal SILAC standard - Lys C13N15, Arg C13N37
024	170606_V2_PM2_CHi_WT_BR3_CID_SCXfrei_1e.raw	LTQ Orbitrap Velos (V2)	WT	RPMI modified	exponential	3	1	whole cell extract, phosphopeptide enriched	1e	In solution digest, TiO enriched phospho peptides, SCX free workflow	internal SILAC standard - Lys C13N15, Arg C13N38
024	170606_V2_PM2_CHi_WT_BR3_CID_SCXfrei_2b.raw	LTQ Orbitrap Velos (V2)	WT	RPMI modified	exponential	3	1	whole cell extract, phosphopeptide enriched	2b	In solution digest, TiO enriched phospho peptides, SCX free workflow	internal SILAC standard - Lys C13N15, Arg C13N39
024	170606_V2_PM2_CHi_WT_BR3_CID_SCXfrei_2c.raw	LTQ Orbitrap Velos (V2)	WT	RPMI modified	exponential	3	1	whole cell extract, phosphopeptide enriched	2c	In solution digest, TiO enriched phospho peptides, SCX free workflow	internal SILAC standard - Lys C13N15, Arg C13N40
024	170606_V2_PM2_CHi_WT_BR3_CID_SCXfrei_2de.raw	LTQ Orbitrap Velos (V2)	WT	RPMI modified	exponential	3	1	whole cell extract, phosphopeptide enriched	2de	In solution digest, TiO enriched phospho peptides, SCX free workflow	internal SILAC standard - Lys C13N15, Arg C13N41
024	170619_V2_PM2_CHi_dstkP_BR1_CID_SCXfrei_1a_Test.raw	LTQ Orbitrap Velos (V2)	ΔstkP	RPMI modified	exponential	1	1	whole cell extract, phosphopeptide enriched	1a	In solution digest, TiO enriched phospho peptides, SCX free workflow	internal SILAC standard - Lys C13N15, Arg C13N42
024	170619_V2_PM2_CHi_dstkP_BR1_CID_SCXfrei_1a.raw	LTQ Orbitrap Velos (V2)	ΔstkP	RPMI modified	exponential	1	1	whole cell extract, phosphopeptide enriched	1a	In solution digest, TiO enriched phospho peptides, SCX free workflow	internal SILAC standard - Lys C13N15, Arg C13N43
024	170619_V2_PM2_CHi_dstkP_BR1_CID_SCXfrei_1b.raw	LTQ Orbitrap Velos (V2)	ΔstkP	RPMI modified	exponential	1	1	whole cell extract, phosphopeptide enriched	1b	In solution digest, TiO enriched phospho peptides, SCX free workflow	internal SILAC standard - Lys C13N15, Arg C13N44
024	170619_V2_PM2_CHi_dstkP_BR1_CID_SCXfrei_1c.raw	LTQ Orbitrap Velos (V2)	ΔstkP	RPMI modified	exponential	1	1	whole cell extract, phosphopeptide enriched	1c	In solution digest, TiO enriched phospho peptides, SCX free workflow	internal SILAC standard - Lys C13N15, Arg C13N45
024	170619_V2_PM2_CHi_dstkP_BR1_CID_SCXfrei_1d.raw	LTQ Orbitrap Velos (V2)	ΔstkP	RPMI modified	exponential	1	1	whole cell extract, phosphopeptide enriched	1d	In solution digest, TiO enriched phospho peptides, SCX free workflow	internal SILAC standard - Lys C13N15, Arg C13N46
024	170619_V2_PM2_CHi_dstkP_BR1_CID_SCXfrei_1e.raw	LTQ Orbitrap Velos (V2)	ΔstkP	RPMI modified	exponential	1	1	whole cell extract, phosphopeptide enriched	1e	In solution digest, TiO enriched phospho peptides, SCX free workflow	internal SILAC standard - Lys C13N15, Arg C13N47
024	170619_V2_PM2_CHi_dstkP_BR1_CID_SCXfrei_2b.raw	LTQ Orbitrap Velos (V2)	ΔstkP	RPMI modified	exponential	1	1	whole cell extract, phosphopeptide enriched	2b	In solution digest, TiO enriched phospho peptides, SCX free workflow	internal SILAC standard - Lys C13N15, Arg C13N48
024	170619_V2_PM2_CHi_dstkP_BR1_CID_SCXfrei_2c.raw	LTQ Orbitrap Velos (V2)	ΔstkP	RPMI modified	exponential	1	1	whole cell extract, phosphopeptide enriched	2c	In solution digest, TiO enriched phospho peptides, SCX free workflow	internal SILAC standard - Lys C13N15, Arg C13N49
024	170619_V2_PM2_CHi_dstkP_BR1_CID_SCXfrei_2de.raw	LTQ Orbitrap Velos (V2)	ΔstkP	RPMI modified	exponential	1	1	whole cell extract, phosphopeptide enriched	2de	In solution digest, TiO enriched phospho peptides, SCX free workflow	internal SILAC standard - Lys C13N15, Arg C13N50
024	170621_V2_PM2_CHi_dstkP_BR2_CID_SCXfrei_1a_Test.raw	LTQ Orbitrap Velos (V2)	ΔstkP	RPMI modified	exponential	2	1	whole cell extract, phosphopeptide enriched	1a	In solution digest, TiO enriched phospho peptides, SCX free workflow	internal SILAC standard - Lys C13N15, Arg C13N51
024	170621_V2_PM2_CHi_dstkP_BR2_CID_SCXfrei_1a.raw	LTQ Orbitrap Velos (V2)	ΔstkP	RPMI modified	exponential	2	1	whole cell extract, phosphopeptide enriched	1a	In solution digest, TiO enriched phospho peptides, SCX free workflow	internal SILAC standard - Lys C13N15, Arg C13N52
024	170621_V2_PM2_CHi_dstkP_BR2_CID_SCXfrei_1b.raw	LTQ Orbitrap Velos (V2)	ΔstkP	RPMI modified	exponential	2	1	whole cell extract, phosphopeptide enriched	1b	In solution digest, TiO enriched phospho peptides, SCX free workflow	internal SILAC standard - Lys C13N15, Arg C13N53
024	170621_V2_PM2_CHi_dstkP_BR2_CID_SCXfrei_1c.raw	LTQ Orbitrap Velos (V2)	ΔstkP	RPMI modified	exponential	2	1	whole cell extract, phosphopeptide enriched	1c	In solution digest, TiO enriched phospho peptides, SCX free workflow	internal SILAC standard - Lys C13N15, Arg C13N54
024	170621_V2_PM2_CHi_dstkP_BR2_CID_SCXfrei_1d.raw	LTQ Orbitrap Velos (V2)	ΔstkP	RPMI modified	exponential	2	1	whole cell extract, phosphopeptide enriched	1d	In solution digest, TiO enriched phospho peptides, SCX free workflow	internal SILAC standard - Lys C13N15, Arg C13N55
024	170621_V2_PM2_CHi_dstkP_BR2_CID_SCXfrei_1e.raw	LTQ Orbitrap Velos (V2)	ΔstkP	RPMI modified	exponential	2	1	whole cell extract, phosphopeptide enriched	1e	In solution digest, TiO enriched phospho peptides, SCX free workflow	internal SILAC standard - Lys C13N15, Arg C13N56
024	170621_V2_PM2_CHi_dstkP_BR2_CID_SCXfrei_2b.raw	LTQ Orbitrap Velos (V2)	ΔstkP	RPMI modified	exponential	2	1	whole cell extract, phosphopeptide enriched	2b	In solution digest, TiO enriched phospho peptides, SCX free workflow	internal SILAC standard - Lys C13N15, Arg C13N57
024	170621_V2_PM2_CHi_dstkP_BR2_CID_SCXfrei_2c.raw	LTQ Orbitrap Velos (V2)	ΔstkP	RPMI modified	exponential	2	1	whole cell extract, phosphopeptide enriched	2c	In solution digest, TiO enriched phospho peptides, SCX free workflow	internal SILAC standard - Lys C13N15, Arg C13N58
024	170621_V2_PM2_CHi_dstkP_BR2_CID_SCXfrei_2de.raw	LTQ Orbitrap Velos (V2)	ΔstkP	RPMI modified	exponential	2	1	whole cell extract, phosphopeptide enriched	2de	In solution digest, TiO enriched phospho peptides, SCX free workflow	internal SILAC standard - Lys C13N15, Arg C13N59
024	170622_V2_PM2_CHi_dstkP_BR3_CID_SCXfrei_1a_Test.raw	LTQ Orbitrap Velos (V2)	ΔstkP	RPMI modified	exponential	3	1	whole cell extract, phosphopeptide enriched	1a	In solution digest, TiO enriched phospho peptides, SCX free workflow	internal SILAC standard - Lys C13N15, Arg C13N60
024	170622_V2_PM2_CHi_dstkP_BR3_CID_SCXfrei_1a.raw	LTQ Orbitrap Velos (V2)	ΔstkP	RPMI modified	exponential	3	1	whole cell extract, phosphopeptide enriched	1a	In solution digest, TiO enriched phospho peptides, SCX free workflow	internal SILAC standard - Lys C13N15, Arg C13N61
024	170622_V2_PM2_CHi_dstkP_BR3_CID_SCXfrei_1b.raw	LTQ Orbitrap Velos (V2)	ΔstkP	RPMI modified	exponential	3	1	whole cell extract, phosphopeptide enriched	1b	In solution digest, TiO enriched phospho peptides, SCX free workflow	internal SILAC standard - Lys C13N15, Arg C13N62
024	170622_V2_PM2_CHi_dstkP_BR3_CID_SCXfrei_1c.raw	LTQ Orbitrap Velos (V2)	ΔstkP	RPMI modified	exponential	3	1	whole cell extract, phosphopeptide enriched	1c	In solution digest, TiO enriched phospho peptides, SCX free workflow	internal SILAC standard - Lys C13N15, Arg C13N63
024	170622_V2_PM2_CHi_dstkP_BR3_CID_SCXfrei_1d.raw	LTQ Orbitrap Velos (V2)	ΔstkP	RPMI modified	exponential	3	1	whole cell extract, phosphopeptide enriched	1d	In solution digest, TiO enriched phospho peptides, SCX free workflow	internal SILAC standard - Lys C13N15, Arg C13N64
024	170622_V2_PM2_CHi_dstkP_BR3_CID_SCXfrei_1e.raw	LTQ Orbitrap Velos (V2)	ΔstkP	RPMI modified	exponential	3	1	whole cell extract, phosphopeptide enriched	1e	In solution digest, TiO enriched phospho peptides, SCX free workflow	internal SILAC standard - Lys C13N15, Arg C13N65
024	170622_V2_PM2_CHi_dstkP_BR3_CID_SCXfrei_2b.raw	LTQ Orbitrap Velos (V2)	ΔstkP	RPMI modified	exponential	3	1	whole cell extract, phosphopeptide enriched	2b	In solution digest, TiO enriched phospho peptides, SCX free workflow	internal SILAC standard - Lys C13N15, Arg C13N66
024	170622_V2_PM2_CHi_dstkP_BR3_CID_SCXfrei_2c.raw	LTQ Orbitrap Velos (V2)	ΔstkP	RPMI modified	exponential	3	1	whole cell extract, phosphopeptide enriched	2c	In solution digest, TiO enriched phospho peptides, SCX free workflow	internal SILAC standard - Lys C13N15, Arg C13N67
024	170622_V2_PM2_CHi_dstkP_BR3_CID_SCXfrei_2de.raw	LTQ Orbitrap Velos (V2)	ΔstkP	RPMI modified	exponential	3	1	whole cell extract, phosphopeptide enriched	2de	In solution digest, TiO enriched phospho peptides, SCX free workflow	internal SILAC standard - Lys C13N15, Arg C13N68
024	170609_V2_PM2_CHi_dphpP_BR1_CID_SCXfrei_1a_Test.raw	LTQ Orbitrap Velos (V2)	ΔphpP	RPMI modified	exponential	1	1	whole cell extract, phosphopeptide enriched	1a	In solution digest, TiO enriched phospho peptides, SCX free workflow	internal SILAC standard - Lys C13N15, Arg C13N69
024	170609_V2_PM2_CHi_dphpP_BR1_CID_SCXfrei_1a.raw	LTQ Orbitrap Velos (V2)	ΔphpP	RPMI modified	exponential	1	1	whole cell extract, phosphopeptide enriched	1a	In solution digest, TiO enriched phospho peptides, SCX free workflow	internal SILAC standard - Lys C13N15, Arg C13N70
024	170609_V2_PM2_CHi_dphpP_BR1_CID_SCXfrei_1b.raw	LTQ Orbitrap Velos (V2)	ΔphpP	RPMI modified	exponential	1	1	whole cell extract, phosphopeptide enriched	1b	In solution digest, TiO enriched phospho peptides, SCX free workflow	internal SILAC standard - Lys C13N15, Arg C13N71
024	170609_V2_PM2_CHi_dphpP_BR1_CID_SCXfrei_1c.raw	LTQ Orbitrap Velos (V2)	ΔphpP	RPMI modified	exponential	1	1	whole cell extract, phosphopeptide enriched	1c	In solution digest, TiO enriched phospho peptides, SCX free workflow	internal SILAC standard - Lys C13N15, Arg C13N72
024	170609_V2_PM2_CHi_dphpP_BR1_CID_SCXfrei_1d.raw	LTQ Orbitrap Velos (V2)	ΔphpP	RPMI modified	exponential	1	1	whole cell extract, phosphopeptide enriched	1d	In solution digest, TiO enriched phospho peptides, SCX free workflow	internal SILAC standard - Lys C13N15, Arg C13N73
024	170609_V2_PM2_CHi_dphpP_BR1_CID_SCXfrei_1e.raw	LTQ Orbitrap Velos (V2)	ΔphpP	RPMI modified	exponential	1	1	whole cell extract, phosphopeptide enriched	1e	In solution digest, TiO enriched phospho peptides, SCX free workflow	internal SILAC standard - Lys C13N15, Arg C13N74
024	170609_V2_PM2_CHi_dphpP_BR1_CID_SCXfrei_2b.raw	LTQ Orbitrap Velos (V2)	ΔphpP	RPMI modified	exponential	1	1	whole cell extract, phosphopeptide enriched	2b	In solution digest, TiO enriched phospho peptides, SCX free workflow	internal SILAC standard - Lys C13N15, Arg C13N75
024	170609_V2_PM2_CHi_dphpP_BR1_CID_SCXfrei_2c.raw	LTQ Orbitrap Velos (V2)	ΔphpP	RPMI modified	exponential	1	1	whole cell extract, phosphopeptide enriched	2c	In solution digest, TiO enriched phospho peptides, SCX free workflow	internal SILAC standard - Lys C13N15, Arg C13N76
024	170609_V2_PM2_CHi_dphpP_BR1_CID_SCXfrei_2de.raw	LTQ Orbitrap Velos (V2)	ΔphpP	RPMI modified	exponential	1	1	whole cell extract, phosphopeptide enriched	2de	In solution digest, TiO enriched phospho peptides, SCX free workflow	internal SILAC standard - Lys C13N15, Arg C13N77
024	170612_V2_PM2_CHi_dphpP_BR2_CID_SCXfrei_1a_Test.raw	LTQ Orbitrap Velos (V2)	ΔphpP	RPMI modified	exponential	2	1	whole cell extract, phosphopeptide enriched	1a	In solution digest, TiO enriched phospho peptides, SCX free workflow	internal SILAC standard - Lys C13N15, Arg C13N78
024	170612_V2_PM2_CHi_dphpP_BR2_CID_SCXfrei_1a.raw	LTQ Orbitrap Velos (V2)	ΔphpP	RPMI modified	exponential	2	1	whole cell extract, phosphopeptide enriched	1a	In solution digest, TiO enriched phospho peptides, SCX free workflow	internal SILAC standard - Lys C13N15, Arg C13N79
024	170612_V2_PM2_CHi_dphpP_BR2_CID_SCXfrei_1b.raw	LTQ Orbitrap Velos (V2)	ΔphpP	RPMI modified	exponential	2	1	whole cell extract, phosphopeptide enriched	1b	In solution digest, TiO enriched phospho peptides, SCX free workflow	internal SILAC standard - Lys C13N15, Arg C13N80
024	170612_V2_PM2_CHi_dphpP_BR2_CID_SCXfrei_1c.raw	LTQ Orbitrap Velos (V2)	ΔphpP	RPMI modified	exponential	2	1	whole cell extract, phosphopeptide enriched	1c	In solution digest, TiO enriched phospho peptides, SCX free workflow	internal SILAC standard - Lys C13N15, Arg C13N81
024	170612_V2_PM2_CHi_dphpP_BR2_CID_SCXfrei_1d.raw	LTQ Orbitrap Velos (V2)	ΔphpP	RPMI modified	exponential	2	1	whole cell extract, phosphopeptide enriched	1d	In solution digest, TiO enriched phospho peptides, SCX free workflow	internal SILAC standard - Lys C13N15, Arg C13N82
024	170612_V2_PM2_CHi_dphpP_BR2_CID_SCXfrei_1e.raw	LTQ Orbitrap Velos (V2)	ΔphpP	RPMI modified	exponential	2	1	whole cell extract, phosphopeptide enriched	1e	In solution digest, TiO enriched phospho peptides, SCX free workflow	internal SILAC standard - Lys C13N15, Arg C13N83
024	170612_V2_PM2_CHi_dphpP_BR2_CID_SCXfrei_2b.raw	LTQ Orbitrap Velos (V2)	ΔphpP	RPMI modified	exponential	2	1	whole cell extract, phosphopeptide enriched	2b	In solution digest, TiO enriched phospho peptides, SCX free workflow	internal SILAC standard - Lys C13N15, Arg C13N84
024	170612_V2_PM2_CHi_dphpP_BR2_CID_SCXfrei_2c.raw	LTQ Orbitrap Velos (V2)	ΔphpP	RPMI modified	exponential	2	1	whole cell extract, phosphopeptide enriched	2c	In solution digest, TiO enriched phospho peptides, SCX free workflow	internal SILAC standard - Lys C13N15, Arg C13N85
024	170612_V2_PM2_CHi_dphpP_BR2_CID_SCXfrei_2de.raw	LTQ Orbitrap Velos (V2)	ΔphpP	RPMI modified	exponential	2	1	whole cell extract, phosphopeptide enriched	2de	In solution digest, TiO enriched phospho peptides, SCX free workflow	internal SILAC standard - Lys C13N15, Arg C13N86
024	170613_V2_PM2_CHi_dphpP_BR3_CID_SCXfrei_1a_Test.raw	LTQ Orbitrap Velos (V2)	ΔphpP	RPMI modified	exponential	3	1	whole cell extract, phosphopeptide enriched	1a	In solution digest, TiO enriched phospho peptides, SCX free workflow	internal SILAC standard - Lys C13N15, Arg C13N87
024	170613_V2_PM2_CHi_dphpP_BR3_CID_SCXfrei_1a.raw	LTQ Orbitrap Velos (V2)	ΔphpP	RPMI modified	exponential	3	1	whole cell extract, phosphopeptide enriched	1a	In solution digest, TiO enriched phospho peptides, SCX free workflow	internal SILAC standard - Lys C13N15, Arg C13N88
024	170613_V2_PM2_CHi_dphpP_BR3_CID_SCXfrei_1b.raw	LTQ Orbitrap Velos (V2)	ΔphpP	RPMI modified	exponential	3	1	whole cell extract, phosphopeptide enriched	1b	In solution digest, TiO enriched phospho peptides, SCX free workflow	internal SILAC standard - Lys C13N15, Arg C13N89
024	170613_V2_PM2_CHi_dphpP_BR3_CID_SCXfrei_1c.raw	LTQ Orbitrap Velos (V2)	ΔphpP	RPMI modified	exponential	3	1	whole cell extract, phosphopeptide enriched	1c	In solution digest, TiO enriched phospho peptides, SCX free workflow	internal SILAC standard - Lys C13N15, Arg C13N90
024	170613_V2_PM2_CHi_dphpP_BR3_CID_SCXfrei_1d.raw	LTQ Orbitrap Velos (V2)	ΔphpP	RPMI modified	exponential	3	1	whole cell extract, phosphopeptide enriched	1d	In solution digest, TiO enriched phospho peptides, SCX free workflow	internal SILAC standard - Lys C13N15, Arg C13N91
024	170613_V2_PM2_CHi_dphpP_BR3_CID_SCXfrei_1e.raw	LTQ Orbitrap Velos (V2)	ΔphpP	RPMI modified	exponential	3	1	whole cell extract, phosphopeptide enriched	1e	In solution digest, TiO enriched phospho peptides, SCX free workflow	internal SILAC standard - Lys C13N15, Arg C13N92
024	170613_V2_PM2_CHi_dphpP_BR3_CID_SCXfrei_2b.raw	LTQ Orbitrap Velos (V2)	ΔphpP	RPMI modified	exponential	3	1	whole cell extract, phosphopeptide enriched	2b	In solution digest, TiO enriched phospho peptides, SCX free workflow	internal SILAC standard - Lys C13N15, Arg C13N93
024	170613_V2_PM2_CHi_dphpP_BR3_CID_SCXfrei_2c.raw	LTQ Orbitrap Velos (V2)	ΔphpP	RPMI modified	exponential	3	1	whole cell extract, phosphopeptide enriched	2c	In solution digest, TiO enriched phospho peptides, SCX free workflow	internal SILAC standard - Lys C13N15, Arg C13N94
024	170613_V2_PM2_CHi_dphpP_BR3_CID_SCXfrei_2de.raw	LTQ Orbitrap Velos (V2)	ΔphpP	RPMI modified	exponential	3	1	whole cell extract, phosphopeptide enriched	2de	In solution digest, TiO enriched phospho peptides, SCX free workflow	internal SILAC standard - Lys C13N15, Arg C13N95
025	110907_OV3_P3_KG_CH_CID_Tio_Sp_1a.raw	LTQ Orbitrap Velos Pro (OV3)	WT	CDM	exponential	1	1	whole cell extract, phosphopeptide enriched	1a	In solution digest, SCX fractionation,TiO enriched phospho peptides	-
025	110907_OV3_P3_KG_CH_CID_Tio_Sp_1b.raw	LTQ Orbitrap Velos Pro (OV3)	WT	CDM	exponential	1	1	whole cell extract, phosphopeptide enriched	1b	In solution digest, SCX fractionation,TiO enriched phospho peptides	-
025	110907_OV3_P3_KG_CH_CID_Tio_Sp_2a.raw	LTQ Orbitrap Velos Pro (OV3)	WT	CDM	exponential	1	1	whole cell extract, phosphopeptide enriched	2a	In solution digest, SCX fractionation,TiO enriched phospho peptides	-
025	110907_OV3_P3_KG_CH_CID_Tio_Sp_3a.raw	LTQ Orbitrap Velos Pro (OV3)	WT	CDM	exponential	1	1	whole cell extract, phosphopeptide enriched	3a	In solution digest, SCX fractionation,TiO enriched phospho peptides	-
025	110907_OV3_P3_KG_CH_CID_Tio_Sp_3b.raw	LTQ Orbitrap Velos Pro (OV3)	WT	CDM	exponential	1	1	whole cell extract, phosphopeptide enriched	3b	In solution digest, SCX fractionation,TiO enriched phospho peptides	-
025	110908_OV3_P3_KG_CH_CID_Tio_Sp_5a.raw	LTQ Orbitrap Velos Pro (OV3)	WT	CDM	exponential	1	1	whole cell extract, phosphopeptide enriched	5a	In solution digest, SCX fractionation,TiO enriched phospho peptides	-
025	110908_OV3_P3_KG_CH_CID_Tio_Sp_5b.raw	LTQ Orbitrap Velos Pro (OV3)	WT	CDM	exponential	1	1	whole cell extract, phosphopeptide enriched	5b	In solution digest, SCX fractionation,TiO enriched phospho peptides	-
025	110908_OV3_P3_KG_CH_CID_Tio_Sp_6a.raw	LTQ Orbitrap Velos Pro (OV3)	WT	CDM	exponential	1	1	whole cell extract, phosphopeptide enriched	6a	In solution digest, SCX fractionation,TiO enriched phospho peptides	-
025	110908_OV3_P3_KG_CH_CID_Tio_Sp_6b.raw	LTQ Orbitrap Velos Pro (OV3)	WT	CDM	exponential	1	1	whole cell extract, phosphopeptide enriched	6b	In solution digest, SCX fractionation,TiO enriched phospho peptides	-
025	110908_OV3_P3_KG_CH_CID_Tio_Sp_7a.raw	LTQ Orbitrap Velos Pro (OV3)	WT	CDM	exponential	1	1	whole cell extract, phosphopeptide enriched	7a	In solution digest, SCX fractionation,TiO enriched phospho peptides	-
025	110908_OV3_P3_KG_CH_CID_Tio_Sp_7b.raw	LTQ Orbitrap Velos Pro (OV3)	WT	CDM	exponential	1	1	whole cell extract, phosphopeptide enriched	7b	In solution digest, SCX fractionation,TiO enriched phospho peptides	-
025	110909_OV3_P3_KG_CH_CID_Tio_Sp_11a.raw	LTQ Orbitrap Velos Pro (OV3)	WT	CDM	exponential	1	1	whole cell extract, phosphopeptide enriched	11a	In solution digest, SCX fractionation,TiO enriched phospho peptides	-
025	110909_OV3_P3_KG_CH_CID_Tio_Sp_11b.raw	LTQ Orbitrap Velos Pro (OV3)	WT	CDM	exponential	1	1	whole cell extract, phosphopeptide enriched	11b	In solution digest, SCX fractionation,TiO enriched phospho peptides	-
025	110909_OV3_P3_KG_CH_CID_Tio_Sp_12a_110912114108.raw	LTQ Orbitrap Velos Pro (OV3)	WT	CDM	exponential	1	1	whole cell extract, phosphopeptide enriched	12a	In solution digest, SCX fractionation,TiO enriched phospho peptides	-
025	110909_OV3_P3_KG_CH_CID_Tio_Sp_12b.raw	LTQ Orbitrap Velos Pro (OV3)	WT	CDM	exponential	1	1	whole cell extract, phosphopeptide enriched	12b	In solution digest, SCX fractionation,TiO enriched phospho peptides	-
025	110909_OV3_P3_KG_CH_CID_Tio_Sp_13einsp.raw	LTQ Orbitrap Velos Pro (OV3)	WT	CDM	exponential	1	1	whole cell extract, phosphopeptide enriched	13a	In solution digest, SCX fractionation,TiO enriched phospho peptides
025	110909_OV3_P3_KG_CH_CID_Tio_Sp_13a.raw	LTQ Orbitrap Velos Pro (OV3)	WT	CDM	exponential	1	1	whole cell extract, phosphopeptide enriched	13a	In solution digest, SCX fractionation,TiO enriched phospho peptides	-
025	110909_OV3_P3_KG_CH_CID_Tio_Sp_13b.raw	LTQ Orbitrap Velos Pro (OV3)	WT	CDM	exponential	1	1	whole cell extract, phosphopeptide enriched	13b	In solution digest, SCX fractionation,TiO enriched phospho peptides	-
025	110909_OV3_P3_KG_CH_CID_Tio_Sp_14a.raw	LTQ Orbitrap Velos Pro (OV3)	WT	CDM	exponential	1	1	whole cell extract, phosphopeptide enriched	14a	In solution digest, SCX fractionation,TiO enriched phospho peptides	-
025	110909_OV3_P3_KG_CH_CID_Tio_Sp_14b.raw	LTQ Orbitrap Velos Pro (OV3)	WT	CDM	exponential	1	1	whole cell extract, phosphopeptide enriched	14b	In solution digest, SCX fractionation,TiO enriched phospho peptides	-
025	110909_OV3_P3_KG_CH_CID_Tio_Sp_1a.raw	LTQ Orbitrap Velos Pro (OV3)	WT	CDM	exponential	1	1	whole cell extract, phosphopeptide enriched	1a	In solution digest, SCX fractionation,TiO enriched phospho peptides	-
025	110909_OV3_P3_KG_CH_CID_Tio_Sp_1b.raw	LTQ Orbitrap Velos Pro (OV3)	WT	CDM	exponential	1	1	whole cell extract, phosphopeptide enriched	1b	In solution digest, SCX fractionation,TiO enriched phospho peptides	-
025	110909_OV3_P3_KG_CH_CID_Tio_Sp_2a.raw	LTQ Orbitrap Velos Pro (OV3)	WT	CDM	exponential	1	1	whole cell extract, phosphopeptide enriched	2a	In solution digest, SCX fractionation,TiO enriched phospho peptides	-
025	110909_OV3_P3_KG_CH_CID_Tio_Sp_2b.raw	LTQ Orbitrap Velos Pro (OV3)	WT	CDM	exponential	1	1	whole cell extract, phosphopeptide enriched	2b	In solution digest, SCX fractionation,TiO enriched phospho peptides	-
025	110909_OV3_P3_KG_CH_CID_Tio_Sp_3a.raw	LTQ Orbitrap Velos Pro (OV3)	WT	CDM	exponential	1	1	whole cell extract, phosphopeptide enriched	3a	In solution digest, SCX fractionation,TiO enriched phospho peptides	-
025	110909_OV3_P3_KG_CH_CID_Tio_Sp_3b.raw	LTQ Orbitrap Velos Pro (OV3)	WT	CDM	exponential	1	1	whole cell extract, phosphopeptide enriched	3b	In solution digest, SCX fractionation,TiO enriched phospho peptides	-
025	110909_OV3_P3_KG_CH_CID_Tio_Sp_4a.raw	LTQ Orbitrap Velos Pro (OV3)	WT	CDM	exponential	1	1	whole cell extract, phosphopeptide enriched	4a	In solution digest, SCX fractionation,TiO enriched phospho peptides	-
025	110909_OV3_P3_KG_CH_CID_Tio_Sp_4b.raw	LTQ Orbitrap Velos Pro (OV3)	WT	CDM	exponential	1	1	whole cell extract, phosphopeptide enriched	4b	In solution digest, SCX fractionation,TiO enriched phospho peptides	-
025	120107_V2_P5_BH_CH_CID_Tio_25c.raw	LTQ Orbitrap Velos Pro (OV3)	WT	CDM	exponential	1	1	whole cell extract, phosphopeptide enriched	25c	In solution digest, SCX fractionation,TiO enriched phospho peptides	-
025	120107_V2_P5_BH_CH_CID_Tio_26c.raw	LTQ Orbitrap Velos (V2)	WT	CDM	exponential	1	1	whole cell extract, phosphopeptide enriched	26c	In solution digest, SCX fractionation,TiO enriched phospho peptides	-
025	120107_V2_P5_BH_CH_CID_Tio_5c.raw	LTQ Orbitrap Velos (V2)	WT	CDM	exponential	1	1	whole cell extract, phosphopeptide enriched	5c	In solution digest, SCX fractionation,TiO enriched phospho peptides	-
025	120107_V2_P5_BH_CH_CID_Tio_6c.raw	LTQ Orbitrap Velos (V2)	WT	CDM	exponential	1	1	whole cell extract, phosphopeptide enriched	6c	In solution digest, SCX fractionation,TiO enriched phospho peptides	-
025	120107_V2_P5_BH_CH_CID_Tio_7c.raw	LTQ Orbitrap Velos (V2)	WT	CDM	exponential	1	1	whole cell extract, phosphopeptide enriched	7c	In solution digest, SCX fractionation,TiO enriched phospho peptides	-
025	120108_V2_P5_BH_CH_CID_Tio_4c.raw	LTQ Orbitrap Velos (V2)	WT	CDM	exponential	1	1	whole cell extract, phosphopeptide enriched	4c	In solution digest, SCX fractionation,TiO enriched phospho peptides	-
025	120108_V2_P5_BH_CH_CID_Tio_5c.raw	LTQ Orbitrap Velos (V2)	WT	CDM	exponential	1	1	whole cell extract, phosphopeptide enriched	5c	In solution digest, SCX fractionation,TiO enriched phospho peptides	-
025	120108_V2_P5_BH_CH_CID_Tio_6c.raw	LTQ Orbitrap Velos (V2)	WT	CDM	exponential	1	1	whole cell extract, phosphopeptide enriched	6c	In solution digest, SCX fractionation,TiO enriched phospho peptides	-
025	120108_V2_P5_BH_CH_CID_Tio_7c.raw	LTQ Orbitrap Velos (V2)	WT	CDM	exponential	1	1	whole cell extract, phosphopeptide enriched	7c	In solution digest, SCX fractionation,TiO enriched phospho peptides	-
025	120108_V2_P5_BH_CH_CID_Tio_8c.raw	LTQ Orbitrap Velos (V2)	WT	CDM	exponential	1	1	whole cell extract, phosphopeptide enriched	8c	In solution digest, SCX fractionation,TiO enriched phospho peptides	-
025	120108_V2_P5_BH_CH_CID_Tio_9c.raw	LTQ Orbitrap Velos (V2)	WT	CDM	exponential	1	1	whole cell extract, phosphopeptide enriched	9c	In solution digest, SCX fractionation,TiO enriched phospho peptides	-
025	120104_V2_P5_BH_CH_CID_Tio_6a_120105140238.raw	LTQ Orbitrap Velos (V2)	WT	CDM	exponential	2	1	whole cell extract, phosphopeptide enriched	6a	In solution digest, SCX fractionation,TiO enriched phospho peptides
025	120104_V2_P5_BH_CH_CID_Tio_6b.raw	LTQ Orbitrap Velos (V2)	WT	CDM	exponential	2	1	whole cell extract, phosphopeptide enriched	6b	In solution digest, SCX fractionation,TiO enriched phospho peptides	-
025	120104_V2_P5_BH_CH_CID_Tio_6c.raw	LTQ Orbitrap Velos (V2)	WT	CDM	exponential	2	1	whole cell extract, phosphopeptide enriched	6c	In solution digest, SCX fractionation,TiO enriched phospho peptides	-
025	120104_V2_P5_BH_CH_CID_Tio_7a_120105161055.raw	LTQ Orbitrap Velos (V2)	WT	CDM	exponential	2	1	whole cell extract, phosphopeptide enriched	7a	In solution digest, SCX fractionation,TiO enriched phospho peptides	-
025	120104_V2_P5_BH_CH_CID_Tio_7b.raw	LTQ Orbitrap Velos (V2)	WT	CDM	exponential	2	1	whole cell extract, phosphopeptide enriched	7b	In solution digest, SCX fractionation,TiO enriched phospho peptides	-
025	120104_V2_P5_BH_CH_CID_Tio_7c_120106114843.raw	LTQ Orbitrap Velos (V2)	WT	CDM	exponential	2	1	whole cell extract, phosphopeptide enriched	7c	In solution digest, SCX fractionation,TiO enriched phospho peptides
025	120104_V2_P5_BH_CH_CID_Tio_8a.raw	LTQ Orbitrap Velos (V2)	WT	CDM	exponential	2	1	whole cell extract, phosphopeptide enriched	8a	In solution digest, SCX fractionation,TiO enriched phospho peptides	-
025	120104_V2_P5_BH_CH_CID_Tio_8b_120106142145.raw	LTQ Orbitrap Velos (V2)	WT	CDM	exponential	2	1	whole cell extract, phosphopeptide enriched	8b	In solution digest, SCX fractionation,TiO enriched phospho peptides	-
025	120104_V2_P5_BH_CH_CID_Tio_8c.raw	LTQ Orbitrap Velos (V2)	WT	CDM	exponential	2	1	whole cell extract, phosphopeptide enriched	8c	In solution digest, SCX fractionation,TiO enriched phospho peptides	-
025	120105_V2_P5_BH_CH_CID_Tio_10a.raw	LTQ Orbitrap Velos (V2)	WT	CDM	exponential	2	1	whole cell extract, phosphopeptide enriched	10a	In solution digest, SCX fractionation,TiO enriched phospho peptides	-
025	120105_V2_P5_BH_CH_CID_Tio_10b.raw	LTQ Orbitrap Velos (V2)	WT	CDM	exponential	2	1	whole cell extract, phosphopeptide enriched	10b	In solution digest, SCX fractionation,TiO enriched phospho peptides	-
025	120105_V2_P5_BH_CH_CID_Tio_11a.raw	LTQ Orbitrap Velos (V2)	WT	CDM	exponential	2	1	whole cell extract, phosphopeptide enriched	11a	In solution digest, SCX fractionation,TiO enriched phospho peptides	-
025	120105_V2_P5_BH_CH_CID_Tio_11b.raw	LTQ Orbitrap Velos (V2)	WT	CDM	exponential	2	1	whole cell extract, phosphopeptide enriched	11b	In solution digest, SCX fractionation,TiO enriched phospho peptides	-
025	120105_V2_P5_BH_CH_CID_Tio_9a.raw	LTQ Orbitrap Velos (V2)	WT	CDM	exponential	2	1	whole cell extract, phosphopeptide enriched	9a	In solution digest, SCX fractionation,TiO enriched phospho peptides	-
025	120105_V2_P5_BH_CH_CID_Tio_9b.raw	LTQ Orbitrap Velos (V2)	WT	CDM	exponential	2	1	whole cell extract, phosphopeptide enriched	9b	In solution digest, SCX fractionation,TiO enriched phospho peptides	-
025	120108_V2_P5_BH_CH_CID_Tio_11c_cdm2.raw	LTQ Orbitrap Velos (V2)	WT	CDM	exponential	2	1	whole cell extract, phosphopeptide enriched	11c	In solution digest, SCX fractionation,TiO enriched phospho peptides	-
025	120113_OV3_P3_KG_CH_CID_Tio_cdm2_12a.raw	LTQ Orbitrap Velos Pro (OV3)	WT	CDM	exponential	2	1	whole cell extract, phosphopeptide enriched	12a	In solution digest, SCX fractionation,TiO enriched phospho peptides	-
025	120113_OV3_P3_KG_CH_CID_Tio_cdm2_12b.raw	LTQ Orbitrap Velos Pro (OV3)	WT	CDM	exponential	2	1	whole cell extract, phosphopeptide enriched	12b	In solution digest, SCX fractionation,TiO enriched phospho peptides	-
025	120113_OV3_P3_KG_CH_CID_Tio_cdm2_13a.raw	LTQ Orbitrap Velos Pro (OV3)	WT	CDM	exponential	2	1	whole cell extract, phosphopeptide enriched	13a	In solution digest, SCX fractionation,TiO enriched phospho peptides	-
025	120113_OV3_P3_KG_CH_CID_Tio_cdm2_13b.raw	LTQ Orbitrap Velos Pro (OV3)	WT	CDM	exponential	2	1	whole cell extract, phosphopeptide enriched	13b	In solution digest, SCX fractionation,TiO enriched phospho peptides	-
025	120113_OV3_P3_KG_CH_CID_Tio_cdm2_14b.raw	LTQ Orbitrap Velos Pro (OV3)	WT	CDM	exponential	2	1	whole cell extract, phosphopeptide enriched	14b	In solution digest, SCX fractionation,TiO enriched phospho peptides	-
025	120113_OV3_P3_KG_CH_CID_Tio_cdm2_15a.raw	LTQ Orbitrap Velos Pro (OV3)	WT	CDM	exponential	2	1	whole cell extract, phosphopeptide enriched	15a	In solution digest, SCX fractionation,TiO enriched phospho peptides	-
025	120113_OV3_P3_KG_CH_CID_Tio_cdm2_15b.raw	LTQ Orbitrap Velos Pro (OV3)	WT	CDM	exponential	2	1	whole cell extract, phosphopeptide enriched	15b	In solution digest, SCX fractionation,TiO enriched phospho peptides	-
025	120113_OV3_P3_KG_CH_CID_Tio_cdm2_16a.raw	LTQ Orbitrap Velos Pro (OV3)	WT	CDM	exponential	2	1	whole cell extract, phosphopeptide enriched	16a	In solution digest, SCX fractionation,TiO enriched phospho peptides	-
025	120113_OV3_P3_KG_CH_CID_Tio_cdm2_16b.raw	LTQ Orbitrap Velos Pro (OV3)	WT	CDM	exponential	2	1	whole cell extract, phosphopeptide enriched	16b	In solution digest, SCX fractionation,TiO enriched phospho peptides	-
025	120113_OV3_P3_KG_CH_CID_Tio_cdm2_17a.raw	LTQ Orbitrap Velos Pro (OV3)	WT	CDM	exponential	2	1	whole cell extract, phosphopeptide enriched	17a	In solution digest, SCX fractionation,TiO enriched phospho peptides	-
025	120113_OV3_P3_KG_CH_CID_Tio_cdm2_17b.raw	LTQ Orbitrap Velos Pro (OV3)	WT	CDM	exponential	2	1	whole cell extract, phosphopeptide enriched	17b	In solution digest, SCX fractionation,TiO enriched phospho peptides	-
025	120114_OV3_P3_KG_CH_CID_Tio_cdm2_12c.raw	LTQ Orbitrap Velos Pro (OV3)	WT	CDM	exponential	2	1	whole cell extract, phosphopeptide enriched	12c	In solution digest, SCX fractionation,TiO enriched phospho peptides	-
025	120114_OV3_P3_KG_CH_CID_Tio_cdm2_13c.raw	LTQ Orbitrap Velos Pro (OV3)	WT	CDM	exponential	2	1	whole cell extract, phosphopeptide enriched	13c	In solution digest, SCX fractionation,TiO enriched phospho peptides
025	120114_OV3_P3_KG_CH_CID_Tio_cdm2_14c.raw	LTQ Orbitrap Velos Pro (OV3)	WT	CDM	exponential	2	1	whole cell extract, phosphopeptide enriched	14c	In solution digest, SCX fractionation,TiO enriched phospho peptides	-
025	120114_OV3_P3_KG_CH_CID_Tio_cdm2_15c.raw	LTQ Orbitrap Velos Pro (OV3)	WT	CDM	exponential	2	1	whole cell extract, phosphopeptide enriched	15c	In solution digest, SCX fractionation,TiO enriched phospho peptides	-
025	120114_OV3_P3_KG_CH_CID_Tio_cdm2_16c.raw	LTQ Orbitrap Velos Pro (OV3)	WT	CDM	exponential	2	1	whole cell extract, phosphopeptide enriched	16c	In solution digest, SCX fractionation,TiO enriched phospho peptides	-
025	120114_OV3_P3_KG_CH_CID_Tio_cdm2_17c.raw	LTQ Orbitrap Velos Pro (OV3)	WT	CDM	exponential	2	1	whole cell extract, phosphopeptide enriched	17c	In solution digest, SCX fractionation,TiO enriched phospho peptides	-
025	120114_OV3_P3_KG_CH_CID_Tio_cdm2_26a.raw	LTQ Orbitrap Velos Pro (OV3)	WT	CDM	exponential	2	1	whole cell extract, phosphopeptide enriched	26a	In solution digest, SCX fractionation,TiO enriched phospho peptides	-
025	120114_OV3_P3_KG_CH_CID_Tio_cdm2_27a.raw	LTQ Orbitrap Velos Pro (OV3)	WT	CDM	exponential	2	1	whole cell extract, phosphopeptide enriched	27a	In solution digest, SCX fractionation,TiO enriched phospho peptides	-
025	120114_OV3_P3_KG_CH_CID_Tio_cdm2_28a.raw	LTQ Orbitrap Velos Pro (OV3)	WT	CDM	exponential	2	1	whole cell extract, phosphopeptide enriched	28a	In solution digest, SCX fractionation,TiO enriched phospho peptides	-
025	120119_V2_P5_BH_CH_CID_Tio_18_21a.raw	LTQ Orbitrap Velos (V2)	WT	CDM	exponential	2	1	whole cell extract, phosphopeptide enriched	21a	In solution digest, SCX fractionation,TiO enriched phospho peptides	-
025	120119_V2_P5_BH_CH_CID_Tio_18_21b.raw	LTQ Orbitrap Velos (V2)	WT	CDM	exponential	2	1	whole cell extract, phosphopeptide enriched	21b	In solution digest, SCX fractionation,TiO enriched phospho peptides	-
025	120119_V2_P5_BH_CH_CID_Tio_22_25a.raw	LTQ Orbitrap Velos (V2)	WT	CDM	exponential	2	1	whole cell extract, phosphopeptide enriched	22-25a	In solution digest, SCX fractionation,TiO enriched phospho peptides	-
025	120119_V2_P5_BH_CH_CID_Tio_22_25b.raw	LTQ Orbitrap Velos (V2)	WT	CDM	exponential	2	1	whole cell extract, phosphopeptide enriched	22-25b	In solution digest, SCX fractionation,TiO enriched phospho peptides	-
025	120119_V2_P5_BH_CH_CID_Tio_26b.raw	LTQ Orbitrap Velos (V2)	WT	CDM	exponential	2	1	whole cell extract, phosphopeptide enriched	26b	In solution digest, SCX fractionation,TiO enriched phospho peptides	-
025	120119_V2_P5_BH_CH_CID_Tio_26c.raw	LTQ Orbitrap Velos (V2)	WT	CDM	exponential	2	1	whole cell extract, phosphopeptide enriched	26c	In solution digest, SCX fractionation,TiO enriched phospho peptides	-
025	120119_V2_P5_BH_CH_CID_Tio_27b.raw	LTQ Orbitrap Velos (V2)	WT	CDM	exponential	2	1	whole cell extract, phosphopeptide enriched	27b	In solution digest, SCX fractionation,TiO enriched phospho peptides	-
025	120119_V2_P5_BH_CH_CID_Tio_27c.raw	LTQ Orbitrap Velos (V2)	WT	CDM	exponential	2	1	whole cell extract, phosphopeptide enriched	27c	In solution digest, SCX fractionation,TiO enriched phospho peptides	-
025	120119_V2_P5_BH_CH_CID_Tio_28b.raw	LTQ Orbitrap Velos (V2)	WT	CDM	exponential	2	1	whole cell extract, phosphopeptide enriched	28b	In solution digest, SCX fractionation,TiO enriched phospho peptides	-
025	120119_V2_P5_BH_CH_CID_Tio_28c.raw	LTQ Orbitrap Velos (V2)	WT	CDM	exponential	2	1	whole cell extract, phosphopeptide enriched	28c	In solution digest, SCX fractionation,TiO enriched phospho peptides	-
025	120120_V2_P5_AO_CH_CID_Tio_10a.raw	LTQ Orbitrap Velos (V2)	WT	CDM	exponential	3	1	whole cell extract, phosphopeptide enriched	10a	In solution digest, SCX fractionation,TiO enriched phospho peptides	-
025	120120_V2_P5_AO_CH_CID_Tio_10b.raw	LTQ Orbitrap Velos (V2)	WT	CDM	exponential	3	1	whole cell extract, phosphopeptide enriched	10b	In solution digest, SCX fractionation,TiO enriched phospho peptides	-
025	120120_V2_P5_AO_CH_CID_Tio_10c.raw	LTQ Orbitrap Velos (V2)	WT	CDM	exponential	3	1	whole cell extract, phosphopeptide enriched	10c	In solution digest, SCX fractionation,TiO enriched phospho peptides	-
025	120120_V2_P5_AO_CH_CID_Tio_11a.raw	LTQ Orbitrap Velos (V2)	WT	CDM	exponential	3	1	whole cell extract, phosphopeptide enriched	11a	In solution digest, SCX fractionation,TiO enriched phospho peptides	-
025	120120_V2_P5_AO_CH_CID_Tio_11b.raw	LTQ Orbitrap Velos (V2)	WT	CDM	exponential	3	1	whole cell extract, phosphopeptide enriched	11b	In solution digest, SCX fractionation,TiO enriched phospho peptides	-
025	120120_V2_P5_AO_CH_CID_Tio_11c.raw	LTQ Orbitrap Velos (V2)	WT	CDM	exponential	3	1	whole cell extract, phosphopeptide enriched	11c	In solution digest, SCX fractionation,TiO enriched phospho peptides	-
025	120120_V2_P5_AO_CH_CID_Tio_12a.raw	LTQ Orbitrap Velos (V2)	WT	CDM	exponential	3	1	whole cell extract, phosphopeptide enriched	12a	In solution digest, SCX fractionation,TiO enriched phospho peptides	-
025	120120_V2_P5_AO_CH_CID_Tio_12b.raw	LTQ Orbitrap Velos (V2)	WT	CDM	exponential	3	1	whole cell extract, phosphopeptide enriched	12b	In solution digest, SCX fractionation,TiO enriched phospho peptides	-
025	120120_V2_P5_AO_CH_CID_Tio_12c.raw	LTQ Orbitrap Velos (V2)	WT	CDM	exponential	3	1	whole cell extract, phosphopeptide enriched	12c	In solution digest, SCX fractionation,TiO enriched phospho peptides	-
025	120120_V2_P5_AO_CH_CID_Tio_25a.raw	LTQ Orbitrap Velos (V2)	WT	CDM	exponential	3	1	whole cell extract, phosphopeptide enriched	25a	In solution digest, SCX fractionation,TiO enriched phospho peptides	-
025	120120_V2_P5_AO_CH_CID_Tio_25b.raw	LTQ Orbitrap Velos (V2)	WT	CDM	exponential	3	1	whole cell extract, phosphopeptide enriched	25b	In solution digest, SCX fractionation,TiO enriched phospho peptides	-
025	120120_V2_P5_AO_CH_CID_Tio_26a.raw	LTQ Orbitrap Velos (V2)	WT	CDM	exponential	3	1	whole cell extract, phosphopeptide enriched	26a	In solution digest, SCX fractionation,TiO enriched phospho peptides	-
025	120120_V2_P5_AO_CH_CID_Tio_26b.raw	LTQ Orbitrap Velos (V2)	WT	CDM	exponential	3	1	whole cell extract, phosphopeptide enriched	26b	In solution digest, SCX fractionation,TiO enriched phospho peptides	-
025	120120_V2_P5_AO_CH_CID_Tio_6a.raw	LTQ Orbitrap Velos (V2)	WT	CDM	exponential	3	1	whole cell extract, phosphopeptide enriched	6a	In solution digest, SCX fractionation,TiO enriched phospho peptides	-
025	120120_V2_P5_AO_CH_CID_Tio_6a_120120213409.raw	LTQ Orbitrap Velos (V2)	WT	CDM	exponential	3	1	whole cell extract, phosphopeptide enriched	6a	In solution digest, SCX fractionation,TiO enriched phospho peptides	-
025	120120_V2_P5_AO_CH_CID_Tio_6b.raw	LTQ Orbitrap Velos (V2)	WT	CDM	exponential	3	1	whole cell extract, phosphopeptide enriched	6b	In solution digest, SCX fractionation,TiO enriched phospho peptides	-
025	120120_V2_P5_AO_CH_CID_Tio_6c.raw	LTQ Orbitrap Velos (V2)	WT	CDM	exponential	3	1	whole cell extract, phosphopeptide enriched	6c	In solution digest, SCX fractionation,TiO enriched phospho peptides	-
025	120120_V2_P5_AO_CH_CID_Tio_7a.raw	LTQ Orbitrap Velos (V2)	WT	CDM	exponential	3	1	whole cell extract, phosphopeptide enriched	7a	In solution digest, SCX fractionation,TiO enriched phospho peptides	-
025	120120_V2_P5_AO_CH_CID_Tio_7b.raw	LTQ Orbitrap Velos (V2)	WT	CDM	exponential	3	1	whole cell extract, phosphopeptide enriched	7b	In solution digest, SCX fractionation,TiO enriched phospho peptides	-
025	120120_V2_P5_AO_CH_CID_Tio_7c.raw	LTQ Orbitrap Velos (V2)	WT	CDM	exponential	3	1	whole cell extract, phosphopeptide enriched	7c	In solution digest, SCX fractionation,TiO enriched phospho peptides	-
025	120120_V2_P5_AO_CH_CID_Tio_8a.raw	LTQ Orbitrap Velos (V2)	WT	CDM	exponential	3	1	whole cell extract, phosphopeptide enriched	8a	In solution digest, SCX fractionation,TiO enriched phospho peptides	-
025	120120_V2_P5_AO_CH_CID_Tio_8b.raw	LTQ Orbitrap Velos (V2)	WT	CDM	exponential	3	1	whole cell extract, phosphopeptide enriched	8b	In solution digest, SCX fractionation,TiO enriched phospho peptides	-
025	120120_V2_P5_AO_CH_CID_Tio_8c.raw	LTQ Orbitrap Velos (V2)	WT	CDM	exponential	3	1	whole cell extract, phosphopeptide enriched	8c	In solution digest, SCX fractionation,TiO enriched phospho peptides	-
025	120120_V2_P5_AO_CH_CID_Tio_9a.raw	LTQ Orbitrap Velos (V2)	WT	CDM	exponential	3	1	whole cell extract, phosphopeptide enriched	9a	In solution digest, SCX fractionation,TiO enriched phospho peptides	-
025	120120_V2_P5_AO_CH_CID_Tio_9b.raw	LTQ Orbitrap Velos (V2)	WT	CDM	exponential	3	1	whole cell extract, phosphopeptide enriched	9b	In solution digest, SCX fractionation,TiO enriched phospho peptides	-
025	120120_V2_P5_AO_CH_CID_Tio_9c.raw	LTQ Orbitrap Velos (V2)	WT	CDM	exponential	3	1	whole cell extract, phosphopeptide enriched	9c	In solution digest, SCX fractionation,TiO enriched phospho peptides	-
025	120125_V2_P5_BH_CH_CID_Tio_13a.raw	LTQ Orbitrap Velos (V2)	WT	CDM	exponential	3	1	whole cell extract, phosphopeptide enriched	13a	In solution digest, SCX fractionation,TiO enriched phospho peptides	-
025	120125_V2_P5_BH_CH_CID_Tio_13b.raw	LTQ Orbitrap Velos (V2)	WT	CDM	exponential	3	1	whole cell extract, phosphopeptide enriched	13b	In solution digest, SCX fractionation,TiO enriched phospho peptides	-
025	120125_V2_P5_BH_CH_CID_Tio_14a.raw	LTQ Orbitrap Velos (V2)	WT	CDM	exponential	3	1	whole cell extract, phosphopeptide enriched	14a	In solution digest, SCX fractionation,TiO enriched phospho peptides	-
025	120125_V2_P5_BH_CH_CID_Tio_14b.raw	LTQ Orbitrap Velos (V2)	WT	CDM	exponential	3	1	whole cell extract, phosphopeptide enriched	14b	In solution digest, SCX fractionation,TiO enriched phospho peptides	-
025	120125_V2_P5_BH_CH_CID_Tio_15a.raw	LTQ Orbitrap Velos (V2)	WT	CDM	exponential	3	1	whole cell extract, phosphopeptide enriched	15a	In solution digest, SCX fractionation,TiO enriched phospho peptides	-
025	120125_V2_P5_BH_CH_CID_Tio_15b.raw	LTQ Orbitrap Velos (V2)	WT	CDM	exponential	3	1	whole cell extract, phosphopeptide enriched	15b	In solution digest, SCX fractionation,TiO enriched phospho peptides	-
025	120127_V2_P5_BH_CH_CID_Tio_16b19a.raw	LTQ Orbitrap Velos (V2)	WT	CDM	exponential	3	1	whole cell extract, phosphopeptide enriched	16b+19a	In solution digest, SCX fractionation,TiO enriched phospho peptides	-
025	120127_V2_P5_BH_CH_CID_Tio_16b19b.raw	LTQ Orbitrap Velos (V2)	WT	CDM	exponential	3	1	whole cell extract, phosphopeptide enriched	16b+19b	In solution digest, SCX fractionation,TiO enriched phospho peptides	-
025	120127_V2_P5_BH_CH_CID_Tio_20b24a.raw	LTQ Orbitrap Velos (V2)	WT	CDM	exponential	3	1	whole cell extract, phosphopeptide enriched	20b+24a	In solution digest, SCX fractionation,TiO enriched phospho peptides	-
025	120127_V2_P5_BH_CH_CID_Tio_20b24b.raw	LTQ Orbitrap Velos (V2)	WT	CDM	exponential	3	1	whole cell extract, phosphopeptide enriched	20b+24b	In solution digest, SCX fractionation,TiO enriched phospho peptides	-
025	120127_V2_P5_BH_CH_CID_Tio_27u28a.raw	LTQ Orbitrap Velos (V2)	WT	CDM	exponential	3	1	whole cell extract, phosphopeptide enriched	27a+28a	In solution digest, SCX fractionation,TiO enriched phospho peptides	-
025	120127_V2_P5_BH_CH_CID_Tio_27u28b.raw	LTQ Orbitrap Velos (V2)	WT	CDM	exponential	3	1	whole cell extract, phosphopeptide enriched	27b+28b	In solution digest, SCX fractionation,TiO enriched phospho peptides	-
025	120127_V2_P5_BH_CH_CID_Tio_5a.raw	LTQ Orbitrap Velos (V2)	WT	CDM	exponential	3	1	whole cell extract, phosphopeptide enriched	5a	In solution digest, SCX fractionation,TiO enriched phospho peptides	-
025	120127_V2_P5_BH_CH_CID_Tio_5b.raw	LTQ Orbitrap Velos (V2)	WT	CDM	exponential	3	1	whole cell extract, phosphopeptide enriched	5b	In solution digest, SCX fractionation,TiO enriched phospho peptides	-
025	120128_V2_P5_CH_CID_Tio_10a.raw	LTQ Orbitrap Velos (V2)	WT	CDM	exponential	4	1	whole cell extract, phosphopeptide enriched	10a	In solution digest, SCX fractionation,TiO enriched phospho peptides	-
025	120128_V2_P5_CH_CID_Tio_10b.raw	LTQ Orbitrap Velos (V2)	WT	CDM	exponential	4	1	whole cell extract, phosphopeptide enriched	10b	In solution digest, SCX fractionation,TiO enriched phospho peptides	-
025	120128_V2_P5_CH_CID_Tio_11a.raw	LTQ Orbitrap Velos (V2)	WT	CDM	exponential	4	1	whole cell extract, phosphopeptide enriched	11a	In solution digest, SCX fractionation,TiO enriched phospho peptides	-
025	120128_V2_P5_CH_CID_Tio_11b.raw	LTQ Orbitrap Velos (V2)	WT	CDM	exponential	4	1	whole cell extract, phosphopeptide enriched	11b	In solution digest, SCX fractionation,TiO enriched phospho peptides	-
025	120128_V2_P5_CH_CID_Tio_12a.raw	LTQ Orbitrap Velos (V2)	WT	CDM	exponential	4	1	whole cell extract, phosphopeptide enriched	12a	In solution digest, SCX fractionation,TiO enriched phospho peptides	-
025	120128_V2_P5_CH_CID_Tio_5a.raw	LTQ Orbitrap Velos (V2)	WT	CDM	exponential	4	1	whole cell extract, phosphopeptide enriched	5a	In solution digest, SCX fractionation,TiO enriched phospho peptides	-
025	120128_V2_P5_CH_CID_Tio_5b.raw	LTQ Orbitrap Velos (V2)	WT	CDM	exponential	4	1	whole cell extract, phosphopeptide enriched	5b	In solution digest, SCX fractionation,TiO enriched phospho peptides	-
025	120128_V2_P5_CH_CID_Tio_6a.raw	LTQ Orbitrap Velos (V2)	WT	CDM	exponential	4	1	whole cell extract, phosphopeptide enriched	6a	In solution digest, SCX fractionation,TiO enriched phospho peptides	-
025	120128_V2_P5_CH_CID_Tio_6b.raw	LTQ Orbitrap Velos (V2)	WT	CDM	exponential	4	1	whole cell extract, phosphopeptide enriched	6b	In solution digest, SCX fractionation,TiO enriched phospho peptides	-
025	120128_V2_P5_CH_CID_Tio_7a.raw	LTQ Orbitrap Velos (V2)	WT	CDM	exponential	4	1	whole cell extract, phosphopeptide enriched	7a	In solution digest, SCX fractionation,TiO enriched phospho peptides	-
025	120128_V2_P5_CH_CID_Tio_7b.raw	LTQ Orbitrap Velos (V2)	WT	CDM	exponential	4	1	whole cell extract, phosphopeptide enriched	7b	In solution digest, SCX fractionation,TiO enriched phospho peptides	-
025	120128_V2_P5_CH_CID_Tio_8a.raw	LTQ Orbitrap Velos (V2)	WT	CDM	exponential	4	1	whole cell extract, phosphopeptide enriched	8a	In solution digest, SCX fractionation,TiO enriched phospho peptides	-
025	120128_V2_P5_CH_CID_Tio_8b.raw	LTQ Orbitrap Velos (V2)	WT	CDM	exponential	4	1	whole cell extract, phosphopeptide enriched	8b	In solution digest, SCX fractionation,TiO enriched phospho peptides	-
025	120128_V2_P5_CH_CID_Tio_9a.raw	LTQ Orbitrap Velos (V2)	WT	CDM	exponential	4	1	whole cell extract, phosphopeptide enriched	9a	In solution digest, SCX fractionation,TiO enriched phospho peptides	-
025	120128_V2_P5_CH_CID_Tio_9b.raw	LTQ Orbitrap Velos (V2)	WT	CDM	exponential	4	1	whole cell extract, phosphopeptide enriched	9b	In solution digest, SCX fractionation,TiO enriched phospho peptides	-
025	120130_V2_P5_CH_CID_Tio_13b.raw	LTQ Orbitrap Velos (V2)	WT	CDM	exponential	4	1	whole cell extract, phosphopeptide enriched	13b	In solution digest, SCX fractionation,TiO enriched phospho peptides	-
025	120130_V2_P5_CH_CID_Tio_14a.raw	LTQ Orbitrap Velos (V2)	WT	CDM	exponential	4	1	whole cell extract, phosphopeptide enriched	14a	In solution digest, SCX fractionation,TiO enriched phospho peptides	-
025	120130_V2_P5_CH_CID_Tio_14b.raw	LTQ Orbitrap Velos (V2)	WT	CDM	exponential	4	1	whole cell extract, phosphopeptide enriched	14b	In solution digest, SCX fractionation,TiO enriched phospho peptides	-
025	120130_V2_P5_CH_CID_Tio_15b.raw	LTQ Orbitrap Velos (V2)	WT	CDM	exponential	4	1	whole cell extract, phosphopeptide enriched	15b	In solution digest, SCX fractionation,TiO enriched phospho peptides	-
025	120130_V2_P5_CH_CID_Tio_16a.raw	LTQ Orbitrap Velos (V2)	WT	CDM	exponential	4	1	whole cell extract, phosphopeptide enriched	16a	In solution digest, SCX fractionation,TiO enriched phospho peptides	-
025	120130_V2_P5_CH_CID_Tio_16b.raw	LTQ Orbitrap Velos (V2)	WT	CDM	exponential	4	1	whole cell extract, phosphopeptide enriched	16b	In solution digest, SCX fractionation,TiO enriched phospho peptides	-
025	120130_V2_P5_CH_CID_Tio_26a.raw	LTQ Orbitrap Velos (V2)	WT	CDM	exponential	4	1	whole cell extract, phosphopeptide enriched	26a	In solution digest, SCX fractionation,TiO enriched phospho peptides	-
025	120130_V2_P5_CH_CID_Tio_26b.raw	LTQ Orbitrap Velos (V2)	WT	CDM	exponential	4	1	whole cell extract, phosphopeptide enriched	26b	In solution digest, SCX fractionation,TiO enriched phospho peptides	-
025	120130_V2_P5_CH_CID_Tio_27a.raw	LTQ Orbitrap Velos (V2)	WT	CDM	exponential	4	1	whole cell extract, phosphopeptide enriched	27a	In solution digest, SCX fractionation,TiO enriched phospho peptides	-
025	120130_V2_P5_CH_CID_Tio_27b.raw	LTQ Orbitrap Velos (V2)	WT	CDM	exponential	4	1	whole cell extract, phosphopeptide enriched	27b	In solution digest, SCX fractionation,TiO enriched phospho peptides	-
025	120130_V2_P5_CH_CID_Tio_9c.raw	LTQ Orbitrap Velos (V2)	WT	CDM	exponential	4	1	whole cell extract, phosphopeptide enriched	9c	In solution digest, SCX fractionation,TiO enriched phospho peptides	-
025	120202_OV3_P3_KG_CH_CID_Tio_cdm4_ 25b.raw	LTQ Orbitrap Velos Pro (OV3)	WT	CDM	exponential	4	1	whole cell extract, phosphopeptide enriched	25b	In solution digest, SCX fractionation,TiO enriched phospho peptides	-
025	120202_OV3_P3_KG_CH_CID_Tio_cdm4_12c.raw	LTQ Orbitrap Velos Pro (OV3)	WT	CDM	exponential	4	1	whole cell extract, phosphopeptide enriched	12c	In solution digest, SCX fractionation,TiO enriched phospho peptides	-
025	120202_OV3_P3_KG_CH_CID_Tio_cdm4_14c.raw	LTQ Orbitrap Velos Pro (OV3)	WT	CDM	exponential	4	1	whole cell extract, phosphopeptide enriched	14c	In solution digest, SCX fractionation,TiO enriched phospho peptides	-
025	120202_OV3_P3_KG_CH_CID_Tio_cdm4_15c.raw	LTQ Orbitrap Velos Pro (OV3)	WT	CDM	exponential	4	1	whole cell extract, phosphopeptide enriched	15c	In solution digest, SCX fractionation,TiO enriched phospho peptides	-
025	120202_OV3_P3_KG_CH_CID_Tio_cdm4_16c.raw	LTQ Orbitrap Velos Pro (OV3)	WT	CDM	exponential	4	1	whole cell extract, phosphopeptide enriched	16c	In solution digest, SCX fractionation,TiO enriched phospho peptides	-
025	120202_OV3_P3_KG_CH_CID_Tio_cdm4_17a.raw	LTQ Orbitrap Velos Pro (OV3)	WT	CDM	exponential	4	1	whole cell extract, phosphopeptide enriched	17a	In solution digest, SCX fractionation,TiO enriched phospho peptides	-
025	120202_OV3_P3_KG_CH_CID_Tio_cdm4_17b.raw	LTQ Orbitrap Velos Pro (OV3)	WT	CDM	exponential	4	1	whole cell extract, phosphopeptide enriched	17b	In solution digest, SCX fractionation,TiO enriched phospho peptides	-
025	120202_OV3_P3_KG_CH_CID_Tio_cdm4_18a.raw	LTQ Orbitrap Velos Pro (OV3)	WT	CDM	exponential	4	1	whole cell extract, phosphopeptide enriched	18a	In solution digest, SCX fractionation,TiO enriched phospho peptides	-
025	120202_OV3_P3_KG_CH_CID_Tio_cdm4_18b.raw	LTQ Orbitrap Velos Pro (OV3)	WT	CDM	exponential	4	1	whole cell extract, phosphopeptide enriched	18b	In solution digest, SCX fractionation,TiO enriched phospho peptides	-
025	120202_OV3_P3_KG_CH_CID_Tio_cdm4_18c.raw	LTQ Orbitrap Velos Pro (OV3)	WT	CDM	exponential	4	1	whole cell extract, phosphopeptide enriched	18c	In solution digest, SCX fractionation,TiO enriched phospho peptides	-
025	120202_OV3_P3_KG_CH_CID_Tio_cdm4_19u20a.raw	LTQ Orbitrap Velos Pro (OV3)	WT	CDM	exponential	4	1	whole cell extract, phosphopeptide enriched	19a+20a	In solution digest, SCX fractionation,TiO enriched phospho peptides	-
025	120202_OV3_P3_KG_CH_CID_Tio_cdm4_19u20b.raw	LTQ Orbitrap Velos Pro (OV3)	WT	CDM	exponential	4	1	whole cell extract, phosphopeptide enriched	19b+20b	In solution digest, SCX fractionation,TiO enriched phospho peptides	-
025	120202_OV3_P3_KG_CH_CID_Tio_cdm4_21u22a.raw	LTQ Orbitrap Velos Pro (OV3)	WT	CDM	exponential	4	1	whole cell extract, phosphopeptide enriched	21a+22a	In solution digest, SCX fractionation,TiO enriched phospho peptides	-
025	120202_OV3_P3_KG_CH_CID_Tio_cdm4_21u22b.raw	LTQ Orbitrap Velos Pro (OV3)	WT	CDM	exponential	4	1	whole cell extract, phosphopeptide enriched	21b+22b	In solution digest, SCX fractionation,TiO enriched phospho peptides	-
025	120202_OV3_P3_KG_CH_CID_Tio_cdm4_23u24a.raw	LTQ Orbitrap Velos Pro (OV3)	WT	CDM	exponential	4	1	whole cell extract, phosphopeptide enriched	23a+24a	In solution digest, SCX fractionation,TiO enriched phospho peptides	-
025	120202_OV3_P3_KG_CH_CID_Tio_cdm4_23u24b.raw	LTQ Orbitrap Velos Pro (OV3)	WT	CDM	exponential	4	1	whole cell extract, phosphopeptide enriched	23b+24b	In solution digest, SCX fractionation,TiO enriched phospho peptides	-
025	120202_OV3_P3_KG_CH_CID_Tio_cdm4_25a.raw	LTQ Orbitrap Velos Pro (OV3)	WT	CDM	exponential	4	1	whole cell extract, phosphopeptide enriched	25a	In solution digest, SCX fractionation,TiO enriched phospho peptides	-
025	120202_OV3_P3_KG_CH_CID_Tio_cdm4_25b.raw	LTQ Orbitrap Velos Pro (OV3)	WT	CDM	exponential	4	1	whole cell extract, phosphopeptide enriched	25b	In solution digest, SCX fractionation,TiO enriched phospho peptides	-
025	120202_OV3_P3_KG_CH_CID_Tio_cdm4_28a.raw	LTQ Orbitrap Velos Pro (OV3)	WT	CDM	exponential	4	1	whole cell extract, phosphopeptide enriched	28a	In solution digest, SCX fractionation,TiO enriched phospho peptides	-
025	120202_OV3_P3_KG_CH_CID_Tio_cdm4_28b.raw	LTQ Orbitrap Velos Pro (OV3)	WT	CDM	exponential	4	1	whole cell extract, phosphopeptide enriched	28b	In solution digest, SCX fractionation,TiO enriched phospho peptides	-
025	120204_OV3_P3_KG_CH_CID_Tio_cdm4_10c.raw	LTQ Orbitrap Velos Pro (OV3)	WT	CDM	exponential	4	1	whole cell extract, phosphopeptide enriched	10c	In solution digest, SCX fractionation,TiO enriched phospho peptides	-
025	120204_OV3_P3_KG_CH_CID_Tio_cdm4_11c.raw	LTQ Orbitrap Velos Pro (OV3)	WT	CDM	exponential	4	1	whole cell extract, phosphopeptide enriched	11c	In solution digest, SCX fractionation,TiO enriched phospho peptides	-
025	120204_OV3_P3_KG_CH_CID_Tio_cdm4_17c.raw	LTQ Orbitrap Velos Pro (OV3)	WT	CDM	exponential	4	1	whole cell extract, phosphopeptide enriched	17c	In solution digest, SCX fractionation,TiO enriched phospho peptides	-
025	120204_OV3_P3_KG_CH_CID_Tio_cdm4_19u20c.raw	LTQ Orbitrap Velos Pro (OV3)	WT	CDM	exponential	4	1	whole cell extract, phosphopeptide enriched	19c+20c	In solution digest, SCX fractionation,TiO enriched phospho peptides	-
025	120204_OV3_P3_KG_CH_CID_Tio_cdm4_21u22c.raw	LTQ Orbitrap Velos Pro (OV3)	WT	CDM	exponential	4	1	whole cell extract, phosphopeptide enriched	21c+22c	In solution digest, SCX fractionation,TiO enriched phospho peptides	-
025	120204_OV3_P3_KG_CH_CID_Tio_cdm4_23u24c.raw	LTQ Orbitrap Velos Pro (OV3)	WT	CDM	exponential	4	1	whole cell extract, phosphopeptide enriched	23c+24c	In solution digest, SCX fractionation,TiO enriched phospho peptides	-
025	120204_OV3_P3_KG_CH_CID_Tio_cdm4_25c.raw	LTQ Orbitrap Velos Pro (OV3)	WT	CDM	exponential	4	1	whole cell extract, phosphopeptide enriched	25c	In solution digest, SCX fractionation,TiO enriched phospho peptides	-
025	120204_OV3_P3_KG_CH_CID_Tio_cdm4_26c.raw	LTQ Orbitrap Velos Pro (OV3)	WT	CDM	exponential	4	1	whole cell extract, phosphopeptide enriched	26c	In solution digest, SCX fractionation,TiO enriched phospho peptides	-
025	120204_OV3_P3_KG_CH_CID_Tio_cdm4_27c.raw	LTQ Orbitrap Velos Pro (OV3)	WT	CDM	exponential	4	1	whole cell extract, phosphopeptide enriched	27c	In solution digest, SCX fractionation,TiO enriched phospho peptides	-
025	120204_OV3_P3_KG_CH_CID_Tio_cdm4_5c.raw	LTQ Orbitrap Velos Pro (OV3)	WT	CDM	exponential	4	1	whole cell extract, phosphopeptide enriched	5c	In solution digest, SCX fractionation,TiO enriched phospho peptides	-
025	120204_OV3_P3_KG_CH_CID_Tio_cdm4_6c.raw	LTQ Orbitrap Velos Pro (OV3)	WT	CDM	exponential	4	1	whole cell extract, phosphopeptide enriched	6c	In solution digest, SCX fractionation,TiO enriched phospho peptides	-
025	120204_OV3_P3_KG_CH_CID_Tio_cdm4_7c.raw	LTQ Orbitrap Velos Pro (OV3)	WT	CDM	exponential	4	1	whole cell extract, phosphopeptide enriched	7c	In solution digest, SCX fractionation,TiO enriched phospho peptides	-
025	120204_OV3_P3_KG_CH_CID_Tio_cdm4_8c.raw	LTQ Orbitrap Velos Pro (OV3)	WT	CDM	exponential	4	1	whole cell extract, phosphopeptide enriched	8c	In solution digest, SCX fractionation,TiO enriched phospho peptides	-
025	120204_OV3_P3_KG_CH_CID_Tio_cdm4_9d.raw	LTQ Orbitrap Velos Pro (OV3)	WT	CDM	exponential	4	1	whole cell extract, phosphopeptide enriched	9d	In solution digest, SCX fractionation,TiO enriched phospho peptides	-
026	130402_OV2_P6_CH_CID_TiO_Bio5_10a.raw	LTQ Orbitrap Velos (V2)	WT	CDM	transient	1	1	whole cell extract, phosphopeptide enriched	10a	In solution digest, SCX fractionation,TiO enriched phospho peptides	-
026	130402_OV2_P6_CH_CID_TiO_Bio5_10b.raw	LTQ Orbitrap Velos (V2)	WT	CDM	transient	1	1	whole cell extract, phosphopeptide enriched	10b	In solution digest, SCX fractionation,TiO enriched phospho peptides	-
026	130402_OV2_P6_CH_CID_TiO_Bio5_10c.raw	LTQ Orbitrap Velos (V2)	WT	CDM	transient	1	1	whole cell extract, phosphopeptide enriched	10c	In solution digest, SCX fractionation,TiO enriched phospho peptides	-
026	130402_OV2_P6_CH_CID_TiO_Bio5_11a.raw	LTQ Orbitrap Velos (V2)	WT	CDM	transient	1	1	whole cell extract, phosphopeptide enriched	11a	In solution digest, SCX fractionation,TiO enriched phospho peptides	-
026	130402_OV2_P6_CH_CID_TiO_Bio5_11b.raw	LTQ Orbitrap Velos (V2)	WT	CDM	transient	1	1	whole cell extract, phosphopeptide enriched	11b	In solution digest, SCX fractionation,TiO enriched phospho peptides	-
026	130402_OV2_P6_CH_CID_TiO_Bio5_11c.raw	LTQ Orbitrap Velos (V2)	WT	CDM	transient	1	1	whole cell extract, phosphopeptide enriched	11c	In solution digest, SCX fractionation,TiO enriched phospho peptides	-
026	130402_OV2_P6_CH_CID_TiO_Bio5_12a.raw	LTQ Orbitrap Velos (V2)	WT	CDM	transient	1	1	whole cell extract, phosphopeptide enriched	12a	In solution digest, SCX fractionation,TiO enriched phospho peptides	-
026	130402_OV2_P6_CH_CID_TiO_Bio5_12b.raw	LTQ Orbitrap Velos (V2)	WT	CDM	transient	1	1	whole cell extract, phosphopeptide enriched	12b	In solution digest, SCX fractionation,TiO enriched phospho peptides	-
026	130402_OV2_P6_CH_CID_TiO_Bio5_12c.raw	LTQ Orbitrap Velos (V2)	WT	CDM	transient	1	1	whole cell extract, phosphopeptide enriched	12c	In solution digest, SCX fractionation,TiO enriched phospho peptides	-
026	130402_OV2_P6_CH_CID_TiO_Bio5_13a.raw	LTQ Orbitrap Velos (V2)	WT	CDM	transient	1	1	whole cell extract, phosphopeptide enriched	13a	In solution digest, SCX fractionation,TiO enriched phospho peptides	-
026	130402_OV2_P6_CH_CID_TiO_Bio5_13b.raw	LTQ Orbitrap Velos (V2)	WT	CDM	transient	1	1	whole cell extract, phosphopeptide enriched	13b	In solution digest, SCX fractionation,TiO enriched phospho peptides	-
026	130402_OV2_P6_CH_CID_TiO_Bio5_13c.raw	LTQ Orbitrap Velos (V2)	WT	CDM	transient	1	1	whole cell extract, phosphopeptide enriched	13c	In solution digest, SCX fractionation,TiO enriched phospho peptides	-
026	130402_OV2_P6_CH_CID_TiO_Bio5_14a.raw	LTQ Orbitrap Velos (V2)	WT	CDM	transient	1	1	whole cell extract, phosphopeptide enriched	14a	In solution digest, SCX fractionation,TiO enriched phospho peptides	-
026	130402_OV2_P6_CH_CID_TiO_Bio5_14b.raw	LTQ Orbitrap Velos (V2)	WT	CDM	transient	1	1	whole cell extract, phosphopeptide enriched	14b	In solution digest, SCX fractionation,TiO enriched phospho peptides	-
026	130402_OV2_P6_CH_CID_TiO_Bio5_14c.raw	LTQ Orbitrap Velos (V2)	WT	CDM	transient	1	1	whole cell extract, phosphopeptide enriched	14c	In solution digest, SCX fractionation,TiO enriched phospho peptides	-
026	130404_OV2_P6_CH_CID_TiO_Bio5_5a.raw	LTQ Orbitrap Velos (V2)	WT	CDM	transient	1	1	whole cell extract, phosphopeptide enriched	5a	In solution digest, SCX fractionation,TiO enriched phospho peptides	-
026	130404_OV2_P6_CH_CID_TiO_Bio5_5b.raw	LTQ Orbitrap Velos (V2)	WT	CDM	transient	1	1	whole cell extract, phosphopeptide enriched	5b	In solution digest, SCX fractionation,TiO enriched phospho peptides	-
026	130404_OV2_P6_CH_CID_TiO_Bio5_6a.raw	LTQ Orbitrap Velos (V2)	WT	CDM	transient	1	1	whole cell extract, phosphopeptide enriched	6a	In solution digest, SCX fractionation,TiO enriched phospho peptides	-
026	130404_OV2_P6_CH_CID_TiO_Bio5_6b.raw	LTQ Orbitrap Velos (V2)	WT	CDM	transient	1	1	whole cell extract, phosphopeptide enriched	6b	In solution digest, SCX fractionation,TiO enriched phospho peptides	-
026	130404_OV2_P6_CH_CID_TiO_Bio5_6c.raw	LTQ Orbitrap Velos (V2)	WT	CDM	transient	1	1	whole cell extract, phosphopeptide enriched	6c	In solution digest, SCX fractionation,TiO enriched phospho peptides	-
026	130404_OV2_P6_CH_CID_TiO_Bio5_7a.raw	LTQ Orbitrap Velos (V2)	WT	CDM	transient	1	1	whole cell extract, phosphopeptide enriched	7a	In solution digest, SCX fractionation,TiO enriched phospho peptides	-
026	130404_OV2_P6_CH_CID_TiO_Bio5_7b.raw	LTQ Orbitrap Velos (V2)	WT	CDM	transient	1	1	whole cell extract, phosphopeptide enriched	7b	In solution digest, SCX fractionation,TiO enriched phospho peptides	-
026	130404_OV2_P6_CH_CID_TiO_Bio5_7c.raw	LTQ Orbitrap Velos (V2)	WT	CDM	transient	1	1	whole cell extract, phosphopeptide enriched	7c	In solution digest, SCX fractionation,TiO enriched phospho peptides	-
026	130404_OV2_P6_CH_CID_TiO_Bio5_8a.raw	LTQ Orbitrap Velos (V2)	WT	CDM	transient	1	1	whole cell extract, phosphopeptide enriched	8a	In solution digest, SCX fractionation,TiO enriched phospho peptides	-
026	130404_OV2_P6_CH_CID_TiO_Bio5_8b.raw	LTQ Orbitrap Velos (V2)	WT	CDM	transient	1	1	whole cell extract, phosphopeptide enriched	8b	In solution digest, SCX fractionation,TiO enriched phospho peptides	-
026	130404_OV2_P6_CH_CID_TiO_Bio5_8c.raw	LTQ Orbitrap Velos (V2)	WT	CDM	transient	1	1	whole cell extract, phosphopeptide enriched	8c	In solution digest, SCX fractionation,TiO enriched phospho peptides	-
026	130404_OV2_P6_CH_CID_TiO_Bio5_9a.raw	LTQ Orbitrap Velos (V2)	WT	CDM	transient	1	1	whole cell extract, phosphopeptide enriched	9a	In solution digest, SCX fractionation,TiO enriched phospho peptides	-
026	130404_OV2_P6_CH_CID_TiO_Bio5_9b.raw	LTQ Orbitrap Velos (V2)	WT	CDM	transient	1	1	whole cell extract, phosphopeptide enriched	9b	In solution digest, SCX fractionation,TiO enriched phospho peptides	-
026	130404_OV2_P6_CH_CID_TiO_Bio5_9c.raw	LTQ Orbitrap Velos (V2)	WT	CDM	transient	1	1	whole cell extract, phosphopeptide enriched	9c	In solution digest, SCX fractionation,TiO enriched phospho peptides	-
026	130405_OV2_P6_CH_CID_TiO_Bio5_20a.raw	LTQ Orbitrap Velos (V2)	WT	CDM	transient	1	1	whole cell extract, phosphopeptide enriched	20a	In solution digest, SCX fractionation,TiO enriched phospho peptides	-
026	130405_OV2_P6_CH_CID_TiO_Bio5_20b.raw	LTQ Orbitrap Velos (V2)	WT	CDM	transient	1	1	whole cell extract, phosphopeptide enriched	20b	In solution digest, SCX fractionation,TiO enriched phospho peptides	-
026	130405_OV2_P6_CH_CID_TiO_Bio5_20c.raw	LTQ Orbitrap Velos (V2)	WT	CDM	transient	1	1	whole cell extract, phosphopeptide enriched	20c	In solution digest, SCX fractionation,TiO enriched phospho peptides	-
026	130405_OV2_P6_CH_CID_TiO_Bio5_6d.raw	LTQ Orbitrap Velos (V2)	WT	CDM	transient	1	1	whole cell extract, phosphopeptide enriched	6d	In solution digest, SCX fractionation,TiO enriched phospho peptides	-
026	130405_OV2_P6_CH_CID_TiO_Bio5_7d.raw	LTQ Orbitrap Velos (V2)	WT	CDM	transient	1	1	whole cell extract, phosphopeptide enriched	7d	In solution digest, SCX fractionation,TiO enriched phospho peptides	-
026	130405_OV2_P6_CH_CID_TiO_Bio5_8d.raw	LTQ Orbitrap Velos (V2)	WT	CDM	transient	1	1	whole cell extract, phosphopeptide enriched	8d	In solution digest, SCX fractionation,TiO enriched phospho peptides	-
026	130405_OV2_P6_CH_CID_TiO_Bio5_9d.raw	LTQ Orbitrap Velos (V2)	WT	CDM	transient	1	1	whole cell extract, phosphopeptide enriched	9d	In solution digest, SCX fractionation,TiO enriched phospho peptides	-
026	130406_OV2_P6_CH_CID_TiO_Bio5_21bis24a.raw	LTQ Orbitrap Velos (V2)	WT	CDM	transient	1	1	whole cell extract, phosphopeptide enriched	21-24a	In solution digest, SCX fractionation,TiO enriched phospho peptides	-
026	130406_OV2_P6_CH_CID_TiO_Bio5_21bis24b.raw	LTQ Orbitrap Velos (V2)	WT	CDM	transient	1	1	whole cell extract, phosphopeptide enriched	21-24b	In solution digest, SCX fractionation,TiO enriched phospho peptides	-
026	130406_OV2_P6_CH_CID_TiO_Bio5_4_27_28_29a.raw	LTQ Orbitrap Velos (V2)	WT	CDM	transient	1	1	whole cell extract, phosphopeptide enriched	4a+27a+28a+29a	In solution digest, SCX fractionation,TiO enriched phospho peptides	-
026	130406_OV2_P6_CH_CID_TiO_Bio5_4_27_28_29b.raw	LTQ Orbitrap Velos (V2)	WT	CDM	transient	1	1	whole cell extract, phosphopeptide enriched	4b+27b+28b+29b	In solution digest, SCX fractionation,TiO enriched phospho peptides	-
026	130408_OV2_P6_CH_CID_TiO_Bio5_25a.raw	LTQ Orbitrap Velos (V2)	WT	CDM	transient	1	1	whole cell extract, phosphopeptide enriched	25a	In solution digest, SCX fractionation,TiO enriched phospho peptides	-
026	130408_OV2_P6_CH_CID_TiO_Bio5_25b.raw	LTQ Orbitrap Velos (V2)	WT	CDM	transient	1	1	whole cell extract, phosphopeptide enriched	25b	In solution digest, SCX fractionation,TiO enriched phospho peptides	-
026	130408_OV2_P6_CH_CID_TiO_Bio5_25c.raw	LTQ Orbitrap Velos (V2)	WT	CDM	transient	1	1	whole cell extract, phosphopeptide enriched	25c	In solution digest, SCX fractionation,TiO enriched phospho peptides	-
026	130408_OV2_P6_CH_CID_TiO_Bio5_26a.raw	LTQ Orbitrap Velos (V2)	WT	CDM	transient	1	1	whole cell extract, phosphopeptide enriched	26a	In solution digest, SCX fractionation,TiO enriched phospho peptides	-
026	130408_OV2_P6_CH_CID_TiO_Bio5_26b.raw	LTQ Orbitrap Velos (V2)	WT	CDM	transient	1	1	whole cell extract, phosphopeptide enriched	26b	In solution digest, SCX fractionation,TiO enriched phospho peptides	-
026	130408_OV2_P6_CH_CID_TiO_Bio5_26c.raw	LTQ Orbitrap Velos (V2)	WT	CDM	transient	1	1	whole cell extract, phosphopeptide enriched	26c	In solution digest, SCX fractionation,TiO enriched phospho peptides	-
026	130408_OV2_P6_CH_CID_TiO_Bio5_3a.raw	LTQ Orbitrap Velos (V2)	WT	CDM	transient	1	1	whole cell extract, phosphopeptide enriched	3a	In solution digest, SCX fractionation,TiO enriched phospho peptides	-
027	111109_OV3_P3_KG_CH_CID_Tio_Sp_13a.raw	LTQ Orbitrap Velos Pro (OV3)	WT	THY	exponential	1	1	whole cell extract, phosphopeptide enriched	13a	In solution digest, SCX fractionation,TiO enriched phospho peptides	-
027	111109_OV3_P3_KG_CH_CID_Tio_Sp_13b.raw	LTQ Orbitrap Velos Pro (OV3)	WT	THY	exponential	1	1	whole cell extract, phosphopeptide enriched	13b	In solution digest, SCX fractionation,TiO enriched phospho peptides	-
027	111109_OV3_P3_KG_CH_CID_Tio_Sp_14a.raw	LTQ Orbitrap Velos Pro (OV3)	WT	THY	exponential	1	1	whole cell extract, phosphopeptide enriched	14a	In solution digest, SCX fractionation,TiO enriched phospho peptides	-
027	111109_OV3_P3_KG_CH_CID_Tio_Sp_14b.raw	LTQ Orbitrap Velos Pro (OV3)	WT	THY	exponential	1	1	whole cell extract, phosphopeptide enriched	14b	In solution digest, SCX fractionation,TiO enriched phospho peptides	-
027	111109_OV3_P3_KG_CH_CID_Tio_Sp_15a.raw	LTQ Orbitrap Velos Pro (OV3)	WT	THY	exponential	1	1	whole cell extract, phosphopeptide enriched	15a	In solution digest, SCX fractionation,TiO enriched phospho peptides	-
027	111109_OV3_P3_KG_CH_CID_Tio_Sp_15b.raw	LTQ Orbitrap Velos Pro (OV3)	WT	THY	exponential	1	1	whole cell extract, phosphopeptide enriched	15b	In solution digest, SCX fractionation,TiO enriched phospho peptides	-
027	111109_OV3_P3_KG_CH_CID_Tio_Sp_16a.raw	LTQ Orbitrap Velos Pro (OV3)	WT	THY	exponential	1	1	whole cell extract, phosphopeptide enriched	16a	In solution digest, SCX fractionation,TiO enriched phospho peptides	-
027	111109_OV3_P3_KG_CH_CID_Tio_Sp_16b.raw	LTQ Orbitrap Velos Pro (OV3)	WT	THY	exponential	1	1	whole cell extract, phosphopeptide enriched	16b	In solution digest, SCX fractionation,TiO enriched phospho peptides	-
027	111109_OV3_P3_KG_CH_CID_Tio_Sp_lauf1.raw	LTQ Orbitrap Velos Pro (OV3)	WT	THY	exponential	1	1	whole cell extract, phosphopeptide enriched	1	In solution digest, SCX fractionation,TiO enriched phospho peptides	-
027	111109_OV3_P3_KG_CH_CID_Tio_Sp_lauf2.raw	LTQ Orbitrap Velos Pro (OV3)	WT	THY	exponential	1	1	whole cell extract, phosphopeptide enriched	2	In solution digest, SCX fractionation,TiO enriched phospho peptides	-
027	111109_OV3_P3_KG_CH_CID_Tio_Sp_lauf3.raw	LTQ Orbitrap Velos Pro (OV3)	WT	THY	exponential	1	1	whole cell extract, phosphopeptide enriched	3	In solution digest, SCX fractionation,TiO enriched phospho peptides	-
027	111109_OV3_P3_KG_CH_CID_Tio_Sp_lauf4.raw	LTQ Orbitrap Velos Pro (OV3)	WT	THY	exponential	1	1	whole cell extract, phosphopeptide enriched	4	In solution digest, SCX fractionation,TiO enriched phospho peptides	-
027	111109_OV3_P3_KG_CH_CID_Tio_Sp_lauf5.raw	LTQ Orbitrap Velos Pro (OV3)	WT	THY	exponential	1	1	whole cell extract, phosphopeptide enriched	5	In solution digest, SCX fractionation,TiO enriched phospho peptides	-
027	111109_OV3_P3_KG_CH_CID_Tio_Sp_lauf6.raw	LTQ Orbitrap Velos Pro (OV3)	WT	THY	exponential	1	1	whole cell extract, phosphopeptide enriched	6	In solution digest, SCX fractionation,TiO enriched phospho peptides	-
027	111111_OV3_P3_KG_CH_CID_Tio_Sp_07a.raw	LTQ Orbitrap Velos Pro (OV3)	WT	THY	exponential	1	1	whole cell extract, phosphopeptide enriched	7a	In solution digest, SCX fractionation,TiO enriched phospho peptides	-
027	111111_OV3_P3_KG_CH_CID_Tio_Sp_07b.raw	LTQ Orbitrap Velos Pro (OV3)	WT	THY	exponential	1	1	whole cell extract, phosphopeptide enriched	7b	In solution digest, SCX fractionation,TiO enriched phospho peptides	-
027	111111_OV3_P3_KG_CH_CID_Tio_Sp_08a.raw	LTQ Orbitrap Velos Pro (OV3)	WT	THY	exponential	1	1	whole cell extract, phosphopeptide enriched	8a	In solution digest, SCX fractionation,TiO enriched phospho peptides	-
027	111111_OV3_P3_KG_CH_CID_Tio_Sp_08b.raw	LTQ Orbitrap Velos Pro (OV3)	WT	THY	exponential	1	1	whole cell extract, phosphopeptide enriched	8b	In solution digest, SCX fractionation,TiO enriched phospho peptides	-
027	111111_OV3_P3_KG_CH_CID_Tio_Sp_09a.raw	LTQ Orbitrap Velos Pro (OV3)	WT	THY	exponential	1	1	whole cell extract, phosphopeptide enriched	9a	In solution digest, SCX fractionation,TiO enriched phospho peptides	-
027	111111_OV3_P3_KG_CH_CID_Tio_Sp_09b.raw	LTQ Orbitrap Velos Pro (OV3)	WT	THY	exponential	1	1	whole cell extract, phosphopeptide enriched	9b	In solution digest, SCX fractionation,TiO enriched phospho peptides	-
027	111111_OV3_P3_KG_CH_CID_Tio_Sp_10a.raw	LTQ Orbitrap Velos Pro (OV3)	WT	THY	exponential	1	1	whole cell extract, phosphopeptide enriched	10a	In solution digest, SCX fractionation,TiO enriched phospho peptides	-
027	111111_OV3_P3_KG_CH_CID_Tio_Sp_10b.raw	LTQ Orbitrap Velos Pro (OV3)	WT	THY	exponential	1	1	whole cell extract, phosphopeptide enriched	10b	In solution digest, SCX fractionation,TiO enriched phospho peptides	-
027	111111_OV3_P3_KG_CH_CID_Tio_Sp_11a.raw	LTQ Orbitrap Velos Pro (OV3)	WT	THY	exponential	1	1	whole cell extract, phosphopeptide enriched	11a	In solution digest, SCX fractionation,TiO enriched phospho peptides	-
027	111111_OV3_P3_KG_CH_CID_Tio_Sp_11b.raw	LTQ Orbitrap Velos Pro (OV3)	WT	THY	exponential	1	1	whole cell extract, phosphopeptide enriched	11b	In solution digest, SCX fractionation,TiO enriched phospho peptides	-
027	111111_OV3_P3_KG_CH_CID_Tio_Sp_12a.raw	LTQ Orbitrap Velos Pro (OV3)	WT	THY	exponential	1	1	whole cell extract, phosphopeptide enriched	12a	In solution digest, SCX fractionation,TiO enriched phospho peptides	-
027	111111_OV3_P3_KG_CH_CID_Tio_Sp_12b.raw	LTQ Orbitrap Velos Pro (OV3)	WT	THY	exponential	1	1	whole cell extract, phosphopeptide enriched	12b	In solution digest, SCX fractionation,TiO enriched phospho peptides	-
027	111114_OV3_P3_KG_CH_CID_Tio_Sp_04_05_a.raw	LTQ Orbitrap Velos Pro (OV3)	WT	THY	exponential	1	1	whole cell extract, phosphopeptide enriched	4a+5a	In solution digest, SCX fractionation,TiO enriched phospho peptides	-
027	111114_OV3_P3_KG_CH_CID_Tio_Sp_04_05_b.raw	LTQ Orbitrap Velos Pro (OV3)	WT	THY	exponential	1	1	whole cell extract, phosphopeptide enriched	4b+5b	In solution digest, SCX fractionation,TiO enriched phospho peptides	-
027	111114_OV3_P3_KG_CH_CID_Tio_Sp_30_31_a.raw	LTQ Orbitrap Velos Pro (OV3)	WT	THY	exponential	1	1	whole cell extract, phosphopeptide enriched	30a+31a	In solution digest, SCX fractionation,TiO enriched phospho peptides	-
027	111114_OV3_P3_KG_CH_CID_Tio_Sp_30_31_b.raw	LTQ Orbitrap Velos Pro (OV3)	WT	THY	exponential	1	1	whole cell extract, phosphopeptide enriched	30b+31b	In solution digest, SCX fractionation,TiO enriched phospho peptides	-
027	111130_OV3_P3_KG_CH_CID_Tio_Sp_25a.raw	LTQ Orbitrap Velos Pro (OV3)	WT	THY	exponential	1	1	whole cell extract, phosphopeptide enriched	25a	In solution digest, SCX fractionation,TiO enriched phospho peptides	-
027	111130_OV3_P3_KG_CH_CID_Tio_Sp_25b.raw	LTQ Orbitrap Velos Pro (OV3)	WT	THY	exponential	1	1	whole cell extract, phosphopeptide enriched	25b	In solution digest, SCX fractionation,TiO enriched phospho peptides	-
027	111130_OV3_P3_KG_CH_CID_Tio_Sp_26a.raw	LTQ Orbitrap Velos Pro (OV3)	WT	THY	exponential	1	1	whole cell extract, phosphopeptide enriched	26a	In solution digest, SCX fractionation,TiO enriched phospho peptides	-
027	111130_OV3_P3_KG_CH_CID_Tio_Sp_26b.raw	LTQ Orbitrap Velos Pro (OV3)	WT	THY	exponential	1	1	whole cell extract, phosphopeptide enriched	26b	In solution digest, SCX fractionation,TiO enriched phospho peptides	-
027	111130_OV3_P3_KG_CH_CID_Tio_Sp_27a.raw	LTQ Orbitrap Velos Pro (OV3)	WT	THY	exponential	1	1	whole cell extract, phosphopeptide enriched	27a	In solution digest, SCX fractionation,TiO enriched phospho peptides	-
027	111130_OV3_P3_KG_CH_CID_Tio_Sp_27b.raw	LTQ Orbitrap Velos Pro (OV3)	WT	THY	exponential	1	1	whole cell extract, phosphopeptide enriched	27b	In solution digest, SCX fractionation,TiO enriched phospho peptides	-
027	111130_OV3_P3_KG_CH_CID_Tio_Sp_6a.raw	LTQ Orbitrap Velos Pro (OV3)	WT	THY	exponential	1	1	whole cell extract, phosphopeptide enriched	6a	In solution digest, SCX fractionation,TiO enriched phospho peptides	-
027	111130_OV3_P3_KG_CH_CID_Tio_Sp_6b.raw	LTQ Orbitrap Velos Pro (OV3)	WT	THY	exponential	1	1	whole cell extract, phosphopeptide enriched	6b	In solution digest, SCX fractionation,TiO enriched phospho peptides	-
027	111130_OV3_P3_KG_CH_CID_Tio_Sp_9c.raw	LTQ Orbitrap Velos Pro (OV3)	WT	THY	exponential	1	1	whole cell extract, phosphopeptide enriched	9c	In solution digest, SCX fractionation,TiO enriched phospho peptides	-
027	120103_V2_P5_BH_CH_CID_Tio_10d.raw	LTQ Orbitrap Velos (V2)	WT	THY	exponential	1	1	whole cell extract, phosphopeptide enriched	10d	In solution digest, SCX fractionation,TiO enriched phospho peptides	-
027	120103_V2_P5_BH_CH_CID_Tio_12d.raw	LTQ Orbitrap Velos (V2)	WT	THY	exponential	1	1	whole cell extract, phosphopeptide enriched	12d	In solution digest, SCX fractionation,TiO enriched phospho peptides	-
027	120103_V2_P5_BH_CH_CID_Tio_13d.raw	LTQ Orbitrap Velos (V2)	WT	THY	exponential	1	1	whole cell extract, phosphopeptide enriched	3d	In solution digest, SCX fractionation,TiO enriched phospho peptides	-
027	120103_V2_P5_BH_CH_CID_Tio_14d.raw	LTQ Orbitrap Velos (V2)	WT	THY	exponential	1	1	whole cell extract, phosphopeptide enriched	14d	In solution digest, SCX fractionation,TiO enriched phospho peptides	-
027	120103_V2_P5_BH_CH_CID_Tio_25d.raw	LTQ Orbitrap Velos (V2)	WT	THY	exponential	1	1	whole cell extract, phosphopeptide enriched	25d	In solution digest, SCX fractionation,TiO enriched phospho peptides	-
027	120103_V2_P5_BH_CH_CID_Tio_26d.raw	LTQ Orbitrap Velos (V2)	WT	THY	exponential	1	1	whole cell extract, phosphopeptide enriched	26d	In solution digest, SCX fractionation,TiO enriched phospho peptides	-
027	120103_V2_P5_BH_CH_CID_Tio_27d.raw	LTQ Orbitrap Velos (V2)	WT	THY	exponential	1	1	whole cell extract, phosphopeptide enriched	27d	In solution digest, SCX fractionation,TiO enriched phospho peptides	-
027	120103_V2_P5_BH_CH_CID_Tio_6d.raw	LTQ Orbitrap Velos (V2)	WT	THY	exponential	1	1	whole cell extract, phosphopeptide enriched	6d	In solution digest, SCX fractionation,TiO enriched phospho peptides	-
027	120103_V2_P5_BH_CH_CID_Tio_7d.raw	LTQ Orbitrap Velos (V2)	WT	THY	exponential	1	1	whole cell extract, phosphopeptide enriched	7d	In solution digest, SCX fractionation,TiO enriched phospho peptides	-
027	120103_V2_P5_BH_CH_CID_Tio_8d.raw	LTQ Orbitrap Velos (V2)	WT	THY	exponential	1	1	whole cell extract, phosphopeptide enriched	8d	In solution digest, SCX fractionation,TiO enriched phospho peptides	-
027	120125_V2_P5_BH_CH_CID_Tio_15c.raw	LTQ Orbitrap Velos (V2)	WT	THY	exponential	1	1	whole cell extract, phosphopeptide enriched	15c	In solution digest, SCX fractionation,TiO enriched phospho peptides	-
027	120125_V2_P5_BH_CH_CID_Tio_16c.raw	LTQ Orbitrap Velos (V2)	WT	THY	exponential	1	1	whole cell extract, phosphopeptide enriched	16c	In solution digest, SCX fractionation,TiO enriched phospho peptides	-
027	120125_V2_P5_BH_CH_CID_Tio_28a.raw	LTQ Orbitrap Velos (V2)	WT	THY	exponential	1	1	whole cell extract, phosphopeptide enriched	28a	In solution digest, SCX fractionation,TiO enriched phospho peptides	-
027	120125_V2_P5_BH_CH_CID_Tio_28b.raw	LTQ Orbitrap Velos (V2)	WT	THY	exponential	1	1	whole cell extract, phosphopeptide enriched	28b	In solution digest, SCX fractionation,TiO enriched phospho peptides	-
027	120125_V2_P5_BH_CH_CID_Tio_29a.raw	LTQ Orbitrap Velos (V2)	WT	THY	exponential	1	1	whole cell extract, phosphopeptide enriched	29a	In solution digest, SCX fractionation,TiO enriched phospho peptides	-
027	120125_V2_P5_BH_CH_CID_Tio_29b.raw	LTQ Orbitrap Velos (V2)	WT	THY	exponential	1	1	whole cell extract, phosphopeptide enriched	29b	In solution digest, SCX fractionation,TiO enriched phospho peptides	-
027	120125_V2_P5_BH_CH_CID_Tio_9d.raw	LTQ Orbitrap Velos (V2)	WT	THY	exponential	1	1	whole cell extract, phosphopeptide enriched	9d	In solution digest, SCX fractionation,TiO enriched phospho peptides	-
