# Supplementary material for: Proteomic Investigation Uncovers Potential Targets and Target Sites of Pneumococcal Serine-Threonine Kinase StkP and Phosphatase PhpP
Source: Front Microbiol. 2020 Feb 4;10:3101. doi: 10.3389/fmicb.2019.03101 (PMC7011611; doi:10.3389/fmicb.2019.03101)
Supplement: Supplementary file 5 [file Data_Sheet_5.xlsx]

## Sheet: Data Sheet S5_Information
Data Sheet S5: On Off protein identifications
Supplementary File S1: On_Off_proteins
	Proteins exclusively identified with at least two unique peptides in three out of three biological replicates in the first strain but in none of the replicates of the second strain are "On" proteins.
	Proteins exclusively identified with at least two unique peptides in three out of three biological replicates in the second strain but in none of the replicates of the first strain are "Off" proteins.
	Identifier
	Protein name
	ΔphpP/WT
	ΔstkP/WT
	Unique peptides WT_BR1
	Unique peptides WT_BR2
	Unique peptides WT_BR3
	Identified in x/3 bioreplicates of WT
	Unique peptides ΔstkP_BR1
	Unique peptides ΔstkP_BR2
	Unique peptides ΔstkP_BR3
	Identified in x/3 bioreplicates of ΔstkP
	Unique peptides ΔphpP_BR1
	Unique peptides ΔphpP_BR2
	Unique peptides ΔphpP_BR3
	Identified in x/3 bioreplicates of ΔphpP

## Sheet: S1_On_Off_proteins
Identifier	Protein name	ΔphpP/WT	ΔstkP/WT	Unique peptides WT_BR1	Unique peptides WT_BR2	Unique peptides WT_BR3	Identified in x/3 bioreplicates of WT	Unique peptides ΔstkP_BR1	Unique peptides ΔstkP_BR2	Unique peptides ΔstkP_BR3	Identified in x/3 bioreplicates of ΔstkP	Unique peptides ΔphpP_BR1	Unique peptides ΔphpP_BR2	Unique peptides ΔphpP_BR3	Identified in x/3 bioreplicates of ΔphpP
gi|116075886	PyrH	-	-	9	10	10	3	11	10	10	3	11	10	10	3
gi|116075887	FibB	-	-	10	10	9	3	8	10	9	3	13	12	13	3
gi|116075888	GidA	-	-	28	23	25	3	31	31	32	3	28	31	32	3
gi|116075889	SPD_1948	Off	Off	2	2	2	3	0	0	0	0	0	0	0	0
gi|116075890	SPD_0112	-	-	1	2	1	1	1	1	2	1	3	3	3	3
gi|116075891	SPD_0039	-	-	8	7	5	3	7	7	6	3	10	8	9	3
gi|116075892	TrkA_2	-	Off	3	2	3	3	0	0	0	0	6	6	5	3
gi|116075894	MurM	-	-	5	5	4	3	0	2	2	2	6	4	3	3
gi|116075895	SoxS	Off	-	3	3	2	3	3	2	2	3	0	0	0	0
gi|116075897	ObgE	-	-	18	18	16	3	20	20	18	3	24	22	17	3
gi|116075902	LivH	-	-	2	1	2	2	1	2	2	2	2	2	2	3
gi|116075903	BlpH	-	-	2	2	2	3	1	1	2	1	2	3	2	3
gi|116075904	TrpA	-	-	3	4	4	3	3	3	2	3	4	4	5	3
gi|116075906	BlpR	-	-	10	9	7	3	8	7	7	3	11	11	10	3
gi|116075907	SPD_0878	-	-	12	12	8	3	10	10	11	3	14	14	12	3
gi|116075908	AfcA	-	-	5	6	3	3	8	7	7	3	6	8	6	3
gi|116075910	HolA	-	-	5	5	3	3	3	4	3	3	5	3	2	3
gi|116075911	RplI	-	-	11	12	12	3	11	10	10	3	9	8	9	3
gi|116075912	Comx1	-	-	0	0	2	1	0	0	0	0	0	0	0	0
gi|116075913	TktN	-	-	6	5	5	3	6	3	5	3	5	5	5	3
gi|116075914	ThrS	-	-	22	23	19	3	25	26	22	3	24	22	25	3
gi|116075915	GsiB	-	-	25	28	24	3	38	32	30	3	24	29	28	3
gi|116075917	SPD_1895	-	-	4	4	3	3	3	4	3	3	4	3	4	3
gi|116075921	SPD_1293	-	-	6	4	6	3	8	6	7	3	6	5	6	3
gi|116075922	SPD_1396	-	-	12	11	7	3	10	11	12	3	16	14	13	3
gi|116075923	SPD_1652	-	-	11	9	9	3	10	11	10	3	10	9	12	3
gi|116075926	SPD_1943	-	-	3	3	2	3	3	3	2	3	3	3	3	3
gi|116075927	SPD_0291	-	-	1	1	2	1	0	0	0	0	2	2	2	3
gi|116075929	MiaA	-	-	8	9	5	3	0	10	8	2	9	7	6	3
gi|116075931	AmiA	-	-	41	40	39	3	43	43	42	3	41	42	42	3
gi|116075932	Tuf	-	-	32	32	31	3	34	37	36	3	36	39	40	3
gi|116075934	Upp	-	-	11	13	12	3	14	11	12	3	18	18	17	3
gi|116075936	SPD_1206	-	-	8	7	8	3	8	8	8	3	7	7	7	3
gi|116075937	PfbA	-	-	2	1	1	1	0	0	0	0	2	4	3	3
gi|116075938	PulA	-	-	30	27	25	3	38	35	28	3	31	33	35	3
gi|116075940	NusA	-	-	22	21	17	3	16	21	20	3	25	22	23	3
gi|116075941	CelA	-	-	10	11	9	3	15	10	12	3	15	13	15	3
gi|116075942	RplD	-	-	10	10	11	3	11	13	12	3	11	11	11	3
gi|116075944	NudF	-	-	10	10	9	3	10	9	9	3	10	10	10	3
gi|116075945	SPD_1556	-	-	8	10	8	3	9	11	9	3	11	10	15	3
gi|116075946	SPD_1033	-	-	6	7	6	3	6	6	6	3	8	8	9	3
gi|116075947	MrnC	-	-	1	2	2	2	0	0	0	0	1	0	2	1
gi|116075949	BglB	-	-	4	3	3	3	1	3	2	2	4	5	3	3
gi|116075951	TktC	-	-	4	4	4	3	1	4	4	2	5	4	5	3
gi|116075952	Ply	-	-	25	28	25	3	25	25	27	3	28	27	30	3
gi|116075954	SPD_2053	-	-	1	2	0	1	2	3	2	3	3	2	1	2
gi|116075955	SuhB	-	-	3	3	1	2	2	3	2	3	2	2	3	3
gi|116075958	FabG	-	-	13	12	13	3	14	14	13	3	14	14	15	3
gi|116075959	MvaS	-	-	9	11	10	3	9	10	10	3	11	10	11	3
gi|116075960	MurC	-	-	14	14	13	3	9	15	14	3	15	17	18	3
gi|116075961	RplO	-	-	9	9	8	3	10	10	10	3	10	10	11	3
gi|116075962	XylH	-	-	1	2	0	1	0	0	0	0	0	0	0	0
gi|116075963	DapE	-	-	15	16	15	3	6	13	12	3	9	8	10	3
gi|116075964	SPD_0909	-	-	4	4	3	3	5	5	4	3	5	5	5	3
gi|116075966	SPD_1242	-	-	4	3	3	3	6	4	5	3	4	4	4	3
gi|116075969	EngB	-	-	9	6	8	3	7	7	6	3	8	8	6	3
gi|116075971	NspC	-	-	8	6	7	3	6	5	5	3	4	3	4	3
gi|116075972	Aga	-	-	3	6	5	3	7	7	6	3	3	6	6	3
gi|116075974	RluD	-	-	6	7	5	3	3	8	5	3	7	7	5	3
gi|116075975	AmyA	-	-	34	30	33	3	35	39	38	3	37	40	39	3
gi|116075978	RpsC	-	-	12	12	12	3	15	11	13	3	14	15	15	3
gi|116075979	SPD_0179	-	-	7	8	7	3	10	12	11	3	12	10	10	3
gi|116075981	SPD_1495	-	-	11	9	10	3	10	9	10	3	9	11	11	3
gi|116075982	IscS	-	-	6	5	4	3	3	5	4	3	5	4	4	3
gi|116075983	PdhC	-	-	9	13	10	3	5	6	7	3	10	10	11	3
gi|116075984	Rex	-	-	7	7	6	3	6	7	7	3	7	7	7	3
gi|116075985	SPD_0408	-	-	1	3	1	1	0	0	0	0	0	0	0	0
gi|116075986	SecA	-	-	44	44	38	3	50	50	42	3	45	48	50	3
gi|116075987	SPD_1389	-	-	4	3	3	3	3	4	3	3	5	3	4	3
gi|116075988	PepF	-	-	23	25	23	3	27	27	29	3	33	33	36	3
gi|116075990	SPD_1217	-	-	4	4	3	3	4	4	3	3	5	5	6	3
gi|116075992	SPD_1793	-	-	6	5	5	3	7	6	5	3	7	7	6	3
gi|116075994	SaeS	-	-	6	6	6	3	2	6	5	3	7	5	6	3
gi|116075996	SPD_1415	-	-	19	21	20	3	19	22	22	3	25	22	25	3
gi|116075997	SPD_1857	-	-	3	0	1	1	0	0	0	0	0	0	0	0
gi|116076002	ProV	-	-	12	11	12	3	13	16	14	3	14	17	16	3
gi|116076003	AfuA	-	-	4	7	3	3	8	9	8	3	14	15	16	3
gi|116076007	UvrC	-	-	5	3	3	3	7	5	7	3	13	12	10	3
gi|116076009	Pgl	-	-	6	7	5	3	8	7	7	3	7	5	11	3
gi|116076010	RplE	-	-	16	16	16	3	19	19	18	3	19	19	18	3
gi|116076012	SPD_0080	-	-	7	6	7	3	4	5	8	3	6	6	7	3
gi|116076014	SPD_1102	-	-	9	8	7	3	2	8	7	3	6	6	7	3
gi|116076015	SPD_2036	-	-	6	6	6	3	7	4	8	3	6	6	5	3
gi|116076016	SPD_0990	-	-	4	3	4	3	3	3	3	3	4	4	3	3
gi|116076017	RpsK	-	-	6	5	5	3	6	6	6	3	6	6	6	3
gi|116076018	MraW	-	-	7	5	4	3	6	5	3	3	8	4	7	3
gi|116076020	RexA	-	-	35	35	35	3	31	31	32	3	45	46	52	3
gi|116076022	RbgA	-	-	14	16	11	3	8	14	12	3	17	19	18	3
gi|116076023	RplQ	-	-	7	8	7	3	9	6	7	3	8	9	7	3
gi|116076025	SPD_1570	-	-	2	1	1	1	0	0	0	0	0	0	0	0
gi|116076028	SPD_1878	-	-	10	9	7	3	3	10	9	3	7	7	8	3
gi|116076029	Gnd	-	-	29	29	29	3	27	30	29	3	32	32	33	3
gi|116076031	IscS	-	-	2	2	2	3	3	3	2	3	5	5	5	3
gi|116076032	SPD_0514	-	-	7	6	4	3	1	4	2	2	6	6	6	3
gi|116076033	SPD_0249	-	-	19	19	15	3	20	21	20	3	17	16	17	3
gi|116076035	AmiE	-	-	21	21	17	3	20	21	19	3	20	20	20	3
gi|116076036	XseA	-	-	11	10	9	3	1	7	6	2	14	11	11	3
gi|116076037	SPD_0335	-	-	23	12	19	3	7	9	8	3	7	11	7	3
gi|116076038	CynT	-	-	2	2	2	3	2	3	2	3	2	3	3	3
gi|116076039	RpmA	-	-	4	4	4	3	6	4	4	3	4	4	4	3
gi|116076040	Pcp	-	-	14	15	15	3	16	16	14	3	14	14	15	3
gi|116076041	CiaR	-	-	6	5	5	3	6	5	4	3	9	9	8	3
gi|116076042	YesM	-	-	3	2	4	3	2	2	3	3	3	4	5	3
gi|116076043	PunA	-	-	10	10	10	3	11	9	10	3	11	11	12	3
gi|116076046	SPD_1522	-	-	6	6	5	3	1	5	6	2	7	5	5	3
gi|116076048	BgaA	-	-	54	43	56	3	48	46	50	3	43	54	49	3
gi|116076049	PheA2	-	-	5	4	3	3	3	6	5	3	7	6	7	3
gi|116076052	SPD_0633	-	-	4	6	4	3	2	2	0	2	5	5	3	3
gi|116076054	PlsC	-	-	11	8	8	3	9	7	10	3	14	12	13	3
gi|116076055	Mgs	-	-	5	4	3	3	2	6	6	3	11	9	10	3
gi|116076057	PurR	-	-	14	15	14	3	16	12	15	3	13	12	14	3
gi|116076058	RuvA	-	-	7	6	4	3	4	4	3	3	5	6	4	3
gi|116076059	SPD_1728	-	-	5	6	5	3	3	3	2	3	6	7	6	3
gi|116076060	SPD_1165	-	-	6	6	5	3	6	6	6	3	5	4	4	3
gi|116076062	SPD_0918	-	-	5	6	5	3	5	5	4	3	4	3	3	3
gi|116076064	PbuO	-	-	3	3	3	3	3	2	2	3	3	2	3	3
gi|116076067	MutX_1	-	-	3	1	2	2	3	5	3	3	5	5	4	3
gi|116076070	Def-2	Off	-	2	2	2	3	2	1	1	1	0	0	0	0
gi|116076071	RpsE	-	-	16	16	16	3	18	19	16	3	17	17	17	3
gi|116076072	RdgB	-	-	13	14	11	3	3	12	12	3	14	11	14	3
gi|116076073	ComE	-	-	17	21	17	3	4	5	4	3	6	6	7	3
gi|116076081	ComD	Off	Off	7	9	8	3	0	0	0	0	0	0	0	0
gi|116076082	MsmX	-	-	14	15	12	3	12	13	12	3	14	16	14	3
gi|116076083	MtaD	-	-	12	10	9	3	9	12	10	3	14	14	13	3
gi|116076086	AtpF	-	-	14	16	16	3	19	14	17	3	18	17	17	3
gi|116076088	AgaS	-	-	5	5	6	3	3	2	2	3	6	4	5	3
gi|116076080	YjiR	On	-	0	0	0	0	0	0	0	0	2	2	2	3
gi|116076091	Tgt	-	-	7	7	7	3	10	10	10	3	8	8	9	3
gi|116076092	SPD_1784	-	-	7	7	6	3	3	5	6	3	4	4	4	3
gi|116076094	SrtA	-	-	9	11	9	3	1	5	6	2	8	7	7	3
gi|116076095	Rsm1	-	-	7	7	5	3	2	4	5	3	3	2	3	3
gi|116076099	HsdS	-	-	12	12	10	3	14	10	12	3	12	12	15	3
gi|116076100	SPD_0184	-	-	3	3	2	3	3	3	3	3	3	3	3	3
gi|116076101	RpsA	-	-	26	27	24	3	28	30	29	3	27	28	28	3
gi|116076102	YlmF	-	-	8	8	8	3	7	8	8	3	8	7	7	3
gi|116076103	MoeZ	-	-	7	7	7	3	8	7	6	3	8	6	8	3
gi|116076106	SPD_1900	-	-	8	7	10	3	8	7	7	3	7	4	7	3
gi|116076108	AatB	-	-	19	20	18	3	20	18	18	3	21	19	22	3
gi|116076109	YkuJ	-	-	5	5	4	3	5	5	5	3	6	5	5	3
gi|116076110	PyrE	-	-	8	9	7	3	8	7	8	3	9	10	11	3
gi|116076113	SPD_1761	Off	-	2	2	2	3	1	2	2	2	0	0	0	0
gi|116076116	Rpe	-	-	4	5	4	3	4	4	3	3	4	5	4	3
gi|116076117	UppS	-	-	6	7	4	3	6	7	7	3	9	10	10	3
gi|116076118	SPD_0007	-	-	5	4	5	3	4	4	5	3	4	5	5	3
gi|116076119	FabG	-	-	3	3	2	3	4	2	3	3	3	3	3	3
gi|116076121	SPD_1586	-	-	5	4	3	3	4	4	3	3	7	6	7	3
gi|116076122	Pck	-	-	17	18	17	3	16	22	22	3	24	23	24	3
gi|116076123	SodA	-	-	11	12	12	3	13	13	13	3	14	14	14	3
gi|116076125	SPD_1928	-	-	7	5	6	3	5	5	4	3	8	7	7	3
gi|116076127	SPD_1143	-	-	3	3	3	3	2	2	2	3	2	2	2	3
gi|116076129	RsfS	-	-	7	5	5	3	7	6	5	3	5	6	6	3
gi|116076132	SPD_1121	-	-	2	2	1	2	2	1	1	1	2	3	3	3
gi|116076133	SPD_0548	-	-	5	3	3	3	5	3	4	3	5	4	5	3
gi|116076136	SPD_2067	-	-	3	4	3	3	3	3	4	3	4	3	4	3
gi|116076090	WhiA	-	-	2	1	1	1	2	2	3	3	0	0	0	0
gi|116076138	AccD	-	-	11	12	10	3	7	9	9	3	10	10	11	3
gi|116076141	LacR1	-	-	6	5	5	3	1	4	3	2	5	3	3	3
gi|116076137	SPD_1985	-	-	4	1	0	1	0	0	0	0	4	4	5	3
gi|116076143	MetK	-	-	17	18	17	3	13	21	22	3	22	22	21	3
gi|116076147	SPD_0094	-	-	2	1	1	1	0	3	2	2	6	6	4	3
gi|116076148	SPD_0131	-	-	5	5	5	3	5	5	5	3	6	5	5	3
gi|116076149	SPD_0978	-	-	6	5	5	3	5	7	5	3	8	7	8	3
gi|116076154	SPD_1367	-	-	18	19	17	3	20	15	17	3	24	22	22	3
gi|116076155	RpoZ	-	-	8	9	9	3	10	9	7	3	7	9	7	3
gi|116076156	SPD_2029	-	-	5	4	5	3	2	2	3	3	2	3	0	2
gi|116076157	PyrG	-	-	25	23	26	3	22	21	22	3	25	27	28	3
gi|116076160	SPD_1922	-	-	9	12	7	3	10	9	9	3	13	9	9	3
gi|116076161	SPD_0836	-	-	13	14	11	3	9	15	13	3	15	14	14	3
gi|116076162	SPD_1291	-	-	10	10	9	3	10	11	10	3	10	11	11	3
gi|116076169	SPD_0410	-	-	6	5	4	3	7	5	7	3	5	7	6	3
gi|116076170	SPD_1109	-	-	5	3	2	3	6	5	2	3	4	4	3	3
gi|116076172	CelA	-	-	4	5	3	3	2	2	1	2	2	2	1	2
gi|116076173	DnaG	-	-	2	4	6	3	4	3	6	3	14	15	14	3
gi|116076175	SPD_1320	-	-	4	5	5	3	6	5	6	3	8	6	6	3
gi|116076176	MsrAB2	-	-	3	4	3	3	8	4	4	3	7	7	7	3
gi|116076178	Ldh	-	-	16	16	14	3	16	14	14	3	15	16	16	3
gi|116076179	SPD_0675	-	-	4	2	4	3	2	3	3	3	4	2	3	3
gi|116076180	Pgm	-	-	35	35	33	3	34	34	34	3	35	34	38	3
gi|116076183	TehB	-	-	5	5	6	3	3	7	6	3	6	4	6	3
gi|116076185	HprK	-	-	20	19	19	3	12	19	18	3	20	19	22	3
gi|116076186	PepN	-	-	48	49	46	3	56	54	52	3	54	55	52	3
gi|116076187	PheT_2	-	-	8	8	8	3	9	8	8	3	9	9	10	3
gi|116076188	SPD_1945	-	-	2	2	2	3	1	1	2	1	2	2	2	3
gi|116076189	AlAS	-	-	51	51	46	3	51	47	44	3	52	51	56	3
gi|116076192	SPD_1435	-	-	9	9	9	3	11	8	8	3	12	9	12	3
gi|116076194	Cmk	-	-	11	12	9	3	15	12	12	3	11	11	12	3
gi|116076142	SPD_0931	-	Off	2	2	3	3	0	0	0	0	4	3	2	3
gi|116076197	DeoD	-	-	11	11	11	3	12	12	12	3	13	13	15	3
gi|116076198	TrmB	-	-	11	11	11	3	10	8	10	3	12	11	11	3
gi|116076200	DapB	-	-	7	8	8	3	9	10	9	3	9	10	12	3
gi|116076202	GatB	-	-	29	27	26	3	21	29	28	3	30	29	30	3
gi|116076203	RplP	-	-	5	5	5	3	6	6	6	3	5	6	6	3
gi|116076207	ParC	-	-	12	14	12	3	17	16	14	3	20	18	19	3
gi|116076211	AsnC	-	-	18	19	19	3	17	17	17	3	20	16	17	3
gi|116076212	BacA	-	-	3	2	2	3	3	2	2	3	5	5	4	3
gi|116076214	RplB	-	-	17	19	16	3	17	19	19	3	20	22	24	3
gi|116076215	SPD_0759	-	-	5	4	3	3	3	3	3	3	5	6	5	3
gi|116076216	AccA	-	-	12	10	9	3	13	10	10	3	13	15	16	3
gi|116076217	SPD_1558	-	-	3	3	3	3	2	2	2	3	2	2	2	3
gi|116076219	CoaD	-	-	2	1	1	1	0	0	0	0	0	0	0	0
gi|116076220	InfC	-	-	9	9	9	3	10	10	9	3	10	10	11	3
gi|116076222	HsdR	-	-	20	20	17	3	22	23	16	3	21	20	23	3
gi|116076223	GtfA	-	-	3	2	2	3	1	2	1	1	1	2	1	1
gi|116076225	ThiE	-	Off	3	3	2	3	0	0	0	0	3	2	1	2
gi|116076226	VicR	-	-	15	15	11	3	15	10	10	3	15	14	17	3
gi|116076227	Ffh	-	-	24	27	25	3	23	19	24	3	25	24	21	3
gi|116076228	LpdA	-	-	25	27	26	3	35	34	27	3	32	32	33	3
gi|116076229	SPD_0741	-	-	3	3	3	3	3	3	3	3	3	3	3	3
gi|116076232	Spx	-	-	2	2	1	2	1	3	1	1	0	0	0	0
gi|116076234	MltG	-	-	31	33	28	3	33	32	33	3	33	35	34	3
gi|116076237	ThiM	-	-	10	9	9	3	7	8	7	3	7	6	6	3
gi|116076244	MutX	-	-	5	4	3	3	4	5	4	3	4	2	6	3
gi|116076245	SPD_0818	-	-	10	10	6	3	12	10	8	3	5	7	6	3
gi|116076247	IlvH	-	-	9	9	9	3	10	9	10	3	10	10	9	3
gi|116076174	SPD_0443	On	-	0	0	0	0	0	0	0	0	3	4	3	3
gi|116076250	SufB	-	-	30	29	28	3	32	29	28	3	31	30	29	3
gi|116076256	RpsT	-	-	4	4	4	3	4	5	4	3	6	6	5	3
gi|116076257	LepB	-	-	6	6	4	3	5	7	5	3	7	7	6	3
gi|116076259	SPD_1179	-	-	4	5	2	3	2	3	5	3	10	8	5	3
gi|116076260	LicC	-	-	16	16	16	3	17	15	17	3	18	19	19	3
gi|116076261	QueA	-	-	12	11	6	3	11	10	9	3	11	9	9	3
gi|116076264	SPD_1449	-	-	4	2	3	3	7	4	6	3	9	8	8	3
gi|116076265	MecA	-	-	12	13	13	3	9	11	12	3	13	11	12	3
gi|116076268	RegR	-	-	5	4	3	3	2	3	2	3	5	5	4	3
gi|116076269	SPD_1572	-	-	13	12	12	3	9	7	9	3	7	6	6	3
gi|116076270	SPD_1658	-	-	5	5	3	3	4	5	4	3	5	4	3	3
gi|116076272	NusG	-	-	10	11	11	3	11	10	9	3	12	11	13	3
gi|116076276	Eep	-	-	14	15	11	3	12	15	15	3	17	17	16	3
gi|116076277	ComB	Off	Off	18	17	16	3	0	0	0	0	0	0	0	0
gi|116076280	RplA	-	-	13	13	15	3	14	14	13	3	14	15	14	3
gi|116076281	RpsH	-	-	12	10	13	3	14	16	13	3	13	13	13	3
gi|116076282	GsiA	-	-	8	16	8	3	20	16	14	3	10	6	5	3
gi|116076284	PyrR	-	-	12	11	9	3	9	9	10	3	14	14	14	3
gi|116076287	SPD_0686	-	-	18	20	18	3	11	17	16	3	16	15	15	3
gi|116076288	GloA	-	-	3	3	3	3	5	3	3	3	3	3	3	3
gi|116076290	PcrA	-	-	24	23	20	3	30	25	26	3	31	28	27	3
gi|116076195	BglF	Off	-	4	3	4	3	6	5	5	3	0	0	0	0
gi|116076292	RplK	-	-	10	11	9	3	12	10	11	3	11	11	11	3
gi|116076293	BirA	Off	-	7	7	4	3	1	2	5	2	0	0	0	0
gi|116076300	RpoC	-	-	74	67	78	3	69	71	73	3	71	79	76	3
gi|116076301	SpeE	-	-	6	6	5	3	0	7	6	2	7	6	6	3
gi|116076303	RluD	-	-	4	4	2	3	0	3	5	2	4	5	6	3
gi|116076304	TruB	-	-	7	6	4	3	6	5	5	3	5	4	5	3
gi|116076305	Tkt	-	-	37	38	39	3	44	46	39	3	41	41	43	3
gi|116076306	CelC	-	-	2	2	2	3	2	3	2	3	5	4	2	3
gi|116076307	Pth	-	-	4	3	3	3	2	1	1	1	3	4	3	3
gi|116076309	SPD_1569	-	-	2	2	2	3	2	2	2	3	2	2	2	3
gi|116076310	GlnQ	-	-	11	10	10	3	13	14	11	3	13	13	12	3
gi|116076249	SPD_1119	On	-	1	1	1	0	0	0	0	0	2	3	3	3
gi|116076312	MurB	-	-	5	5	6	3	4	6	6	3	7	6	5	3
gi|116076313	SPD_1787	-	-	8	8	5	3	9	8	8	3	10	8	6	3
gi|116076314	SPD_1637	-	-	3	1	3	2	4	4	2	3	2	2	2	3
gi|116076315	Lmb	-	-	21	20	18	3	22	18	19	3	23	20	23	3
gi|116076316	SPD_0490	-	-	9	8	7	3	9	9	10	3	10	10	8	3
gi|116076319	ArgR	-	-	9	8	7	3	8	8	8	3	6	6	8	3
gi|116076320	SPD_0804	-	-	5	6	4	3	1	2	2	2	5	4	5	3
gi|116076321	SPD_0464	-	-	3	3	2	3	6	4	3	3	5	3	7	3
gi|116076291	HolB	-	-	1	4	2	2	0	0	0	0	3	3	5	3
gi|116076324	SPD_2050	-	-	5	6	5	3	6	5	5	3	5	5	4	3
gi|116076325	CodY	-	-	15	16	16	3	7	13	12	3	14	13	15	3
gi|116076326	SPD_0982	-	-	4	4	2	3	2	2	4	3	5	5	4	3
gi|116076327	SPD_1622	-	-	9	7	7	3	11	10	9	3	12	13	14	3
gi|116076328	SPD_1297	-	-	18	21	20	3	19	21	21	3	22	25	24	3
gi|116076329	LicD3	-	-	5	5	5	3	0	5	3	2	6	5	6	3
gi|116076330	FtsE	-	-	12	14	13	3	12	14	12	3	19	18	19	3
gi|116076331	RbfA	-	-	7	8	7	3	8	9	7	3	7	7	10	3
gi|116076332	LivJ	-	-	22	20	18	3	18	20	19	3	19	20	21	3
gi|116076333	MurF	-	-	12	12	11	3	1	14	11	2	19	19	20	3
gi|116076335	CppA	-	-	11	11	12	3	7	9	9	3	8	8	9	3
gi|116076338	MurD	-	-	18	18	15	3	11	19	19	3	17	18	19	3
gi|116076340	RpmE2	-	-	8	9	8	3	6	9	8	3	9	8	9	3
gi|116076341	Alr	-	-	6	7	3	3	8	10	6	3	7	8	11	3
gi|116076343	KsgA	-	-	14	14	14	3	3	13	16	3	13	14	15	3
gi|116076344	Fni	-	-	8	8	3	3	3	5	3	3	7	7	5	3
gi|116076345	Fmt	-	-	18	21	18	3	20	18	18	3	19	20	19	3
gi|116076346	SPD_1874	-	-	7	9	11	3	4	1	3	2	10	11	10	3
gi|116076348	PurA	-	-	19	22	21	3	5	13	9	3	17	15	15	3
gi|116076350	CoaA	-	-	2	4	1	2	1	6	4	2	7	5	6	3
gi|116076351	MvaD	-	-	9	11	6	3	1	9	9	2	14	11	12	3
gi|116076352	PurE	-	-	8	8	9	3	7	8	7	3	7	7	7	3
gi|116076353	Zwf	-	-	23	21	19	3	29	24	22	3	21	23	25	3
gi|116076355	SPD_1080	-	-	8	6	3	3	9	7	5	3	9	10	6	3
gi|116076356	ZmpB	-	-	90	84	89	3	107	97	107	3	94	115	113	3
gi|116076357	PepV	-	-	21	20	21	3	19	27	26	3	28	26	27	3
gi|116076358	BlpT	-	-	10	10	8	3	2	1	1	1	2	2	0	2
gi|116076359	CinA	-	-	8	7	8	3	1	3	4	2	5	4	2	3
gi|116076360	AsnA	-	-	20	20	17	3	22	20	18	3	19	18	20	3
gi|116076361	RluB	-	-	17	16	16	3	24	19	21	3	20	18	21	3
gi|116076362	SPD_0693	-	-	14	15	13	3	5	11	9	3	12	13	11	3
gi|116076363	HisS	-	-	22	19	18	3	7	16	17	3	16	15	16	3
gi|116076364	PgdA	-	-	11	9	9	3	3	15	10	3	21	21	21	3
gi|116076366	Gph	-	-	4	5	4	3	5	4	4	3	5	5	5	3
gi|116076368	ManL	-	-	22	24	22	3	23	22	24	3	26	24	26	3
gi|116076369	NadE	-	-	12	14	13	3	12	10	11	3	11	12	13	3
gi|116076370	LysC	-	-	21	19	17	3	15	20	21	3	22	19	21	3
gi|116076371	NrdD_2	-	-	8	7	8	3	9	7	9	3	8	9	9	3
gi|116076375	GpsB	-	-	12	11	10	3	11	11	14	3	12	11	13	3
gi|116076376	PcpA	-	-	3	3	2	3	2	1	3	2	1	2	0	1
gi|116076378	PurN	-	-	1	2	1	1	0	0	0	0	0	0	0	0
gi|116076382	RuvB	-	-	6	5	4	3	4	6	4	3	6	5	6	3
gi|116076383	RumA-1	-	-	18	17	17	3	20	19	17	3	20	23	23	3
gi|116076384	AnsA	-	-	5	5	5	3	1	5	5	2	4	4	4	3
gi|116076385	PhoU2	-	-	17	18	16	3	19	17	18	3	19	19	19	3
gi|116076386	PyrC	-	-	15	16	14	3	9	15	12	3	16	17	17	3
gi|116076388	Xpt	-	-	12	13	10	3	13	14	11	3	8	8	8	3
gi|116076389	CorA	-	-	5	5	4	3	6	6	4	3	8	8	9	3
gi|116076390	Ssb_2	Off	Off	9	8	10	3	0	0	0	0	0	0	0	0
gi|116076391	SPD_1402	-	-	11	12	11	3	13	13	12	3	12	12	12	3
gi|116076394	RecD	-	-	6	9	8	3	13	4	4	3	10	9	12	3
gi|116076395	SPD_0181	-	-	7	7	9	3	8	7	9	3	10	9	12	3
gi|116076398	SPD_0714	-	-	4	5	5	3	4	4	4	3	5	5	6	3
gi|116076401	SPD_1448	-	-	4	4	5	3	5	5	5	3	6	6	5	3
gi|116076404	MetN	-	-	11	11	11	3	11	11	11	3	14	12	11	3
gi|116076405	SPD_1166	-	-	9	9	8	3	7	11	13	3	6	6	9	3
gi|116076406	RplW	-	-	11	11	10	3	13	13	13	3	10	12	13	3
gi|116076407	MutS	-	-	18	19	21	3	18	23	19	3	19	20	19	3
gi|116076409	SPD_1576	-	-	3	3	2	3	2	2	2	3	2	2	2	3
gi|116076410	NadD	-	-	4	5	5	3	6	4	5	3	9	10	8	3
gi|116076416	SPD_1037	-	-	9	9	8	3	11	10	9	3	9	9	9	3
gi|116076419	SPD_1848	-	-	5	6	4	3	7	3	5	3	10	8	10	3
gi|116076421	GatC	-	-	6	5	5	3	6	4	6	3	4	7	5	3
gi|116076422	PolC	-	-	16	11	11	3	12	13	11	3	22	19	24	3
gi|116076423	RpmB	-	-	2	4	3	3	3	4	4	3	4	4	4	3
gi|116076424	TrkA_1	-	-	7	7	8	3	10	8	9	3	9	9	9	3
gi|116076427;gi|116076322;gi|116077586	protein group	-	-	4	4	4	3	4	4	4	3	5	5	6	3
gi|116076429	LytC	-	-	5	8	4	3	7	3	6	3	9	9	7	3
gi|116076430	SPD_0740	-	-	17	18	15	3	20	21	15	3	25	23	22	3
gi|116076431	RpsQ	-	-	7	7	6	3	10	11	10	3	9	10	11	3
gi|116076433	AckA	-	-	16	16	16	3	15	15	15	3	16	15	16	3
gi|116076434	SPD_2057	-	-	28	27	27	3	29	28	27	3	29	31	32	3
gi|116076436	Fba	-	-	17	18	17	3	18	18	19	3	18	19	19	3
gi|116076437	PepT	-	-	22	23	21	3	19	22	23	3	25	24	24	3
gi|116076439	ManM	-	-	3	3	3	3	4	3	3	3	4	3	4	3
gi|116076440	DpnD	-	-	6	6	5	3	3	4	4	3	4	5	4	3
gi|116076441	PpnK	-	-	10	10	8	3	9	9	11	3	11	13	14	3
gi|116076445	ComFC	-	-	2	1	3	2	0	0	0	0	0	0	0	0
gi|116076447	RplR	-	-	9	8	8	3	11	9	9	3	9	10	9	3
gi|116076448	SPD_0782	-	-	17	20	13	3	14	14	11	3	16	13	10	3
gi|116076449	SPD_0708	-	-	4	4	2	3	4	4	3	3	5	5	5	3
gi|116076450	SPD_1729	-	-	9	8	7	3	7	8	5	3	9	9	10	3
gi|116076451	AcpS	-	-	2	2	2	3	2	2	2	3	1	3	0	1
gi|116076452	PsPA	-	-	8	5	10	3	6	9	9	3	6	10	10	3
gi|116076453	Adk	-	-	19	18	18	3	20	20	18	3	18	18	19	3
gi|116076454	SPD_1969	-	-	7	7	8	3	10	7	8	3	8	9	10	3
gi|116076455	Der	-	-	15	16	12	3	10	16	14	3	18	18	18	3
gi|116076456	SPD_0451	Off	Off	3	3	5	3	0	0	0	0	0	0	0	0
gi|116076457	PncB	-	-	18	20	16	3	16	12	13	3	19	19	18	3
gi|116076459	PtsI	-	-	38	40	38	3	42	43	38	3	40	43	42	3
gi|116076460	MurA-1	-	-	20	21	16	3	20	22	20	3	22	22	22	3
gi|116076462	AdhE	-	-	41	41	38	3	41	38	33	3	37	38	39	3
gi|116076463;gi|116077057	protein group	Off	Off	9	8	7	3	0	0	0	0	0	0	0	0
gi|116076465	AroA	-	-	18	20	17	3	14	19	19	3	21	21	23	3
gi|116076466	LacA	-	-	5	4	4	3	3	3	3	3	3	3	4	3
gi|116076469	RnpA	-	-	6	6	5	3	7	7	8	3	8	10	10	3
gi|116076471	PsaB	-	-	9	9	8	3	13	10	9	3	12	12	12	3
gi|116076472	GldA	-	-	9	9	5	3	8	11	9	3	8	9	11	3
gi|116076476	Fer	-	-	1	2	1	1	2	1	1	1	2	3	2	3
gi|116076478	SPD_1973	-	-	3	6	4	3	11	10	7	3	9	8	6	3
gi|116076479	SPD_1591	-	-	1	1	1	0	0	0	0	0	0	0	0	0
gi|116076481	AtpG	-	-	17	15	14	3	16	16	14	3	13	14	15	3
gi|116076482	Smc	-	-	30	25	28	3	15	16	17	3	37	31	36	3
gi|116076484	SPD_1590	-	-	22	21	20	3	23	21	19	3	16	16	17	3
gi|116076486	CglC	Off	Off	8	7	8	3	0	0	0	0	0	0	0	0
gi|116076489	TsaE	-	-	5	5	5	3	5	6	5	3	6	6	7	3
gi|116076491	PlsX	-	-	11	12	11	3	10	10	11	3	11	11	12	3
gi|116076494	ComEB	-	-	4	3	3	3	4	4	4	3	4	5	4	3
gi|116076496	SPD_1921	-	-	3	3	0	2	2	1	3	2	4	4	3	3
gi|116076497	MetB	-	-	12	10	7	3	13	13	10	3	14	15	14	3
gi|116076498	VicK	-	-	4	2	3	3	0	4	4	2	6	8	7	3
gi|116076500	Lgt	-	-	5	5	5	3	2	1	3	2	5	5	5	3
gi|116076501	MutM	-	-	8	7	7	3	7	6	6	3	4	4	4	3
gi|116076504	AccC	-	-	16	16	15	3	7	12	12	3	15	15	15	3
gi|116076506	Dut	-	-	7	7	5	3	6	5	6	3	5	7	6	3
gi|116076311	PurM	Off	-	9	11	4	3	2	2	2	3	0	0	0	0
gi|116076509	DivIVA	-	-	16	16	15	3	17	17	15	3	15	14	15	3
gi|116076512	Rnr	-	-	23	25	28	3	31	23	23	3	18	23	21	3
gi|116076513	SPD_1436	-	-	5	6	3	3	5	5	3	3	13	15	9	3
gi|116076514	DnaQ	-	-	6	8	5	3	4	5	3	3	4	5	4	3
gi|116076517	DltD	Off	-	3	3	2	3	0	3	2	2	0	0	0	0
gi|116076518	IleS	-	-	35	33	32	3	37	37	36	3	33	37	38	3
gi|116076519	SPD_1417	-	-	4	5	4	3	3	5	5	3	5	5	8	3
gi|116076323	SpoJ	-	Off	5	5	4	3	0	0	0	0	9	7	4	3
gi|116076521	FolE	-	-	10	12	9	3	13	12	11	3	14	13	14	3
gi|116076522	SPD_1072	-	-	13	13	5	3	8	8	9	3	12	10	10	3
gi|116076523	SPD_1290	-	-	3	3	3	3	4	3	3	3	4	3	4	3
gi|116076525	SPD_1331	-	-	8	6	7	3	2	6	6	3	8	6	5	3
gi|116076527	SPD_0064	-	-	10	10	10	3	10	10	10	3	11	10	11	3
gi|116076534	MalP	-	-	35	36	33	3	42	45	41	3	40	43	44	3
gi|116076536	SPD_0930	-	-	4	2	2	3	3	4	2	3	4	7	4	3
gi|116076539	ProS	-	-	34	34	34	3	39	38	36	3	37	37	38	3
gi|116076475	SPD_1376	-	On	0	0	0	0	5	9	8	3	0	0	0	0
gi|116076541	GuaB	-	-	29	30	27	3	28	27	28	3	30	32	30	3
gi|116076543	TrpF	Off	Off	2	2	2	3	0	0	0	0	0	0	0	0
gi|116076544	ClpL	-	-	21	19	12	3	19	16	15	3	34	40	38	3
gi|116076545	HslO	-	-	14	14	12	3	10	14	14	3	13	14	14	3
gi|116076547	MurG	-	-	3	3	1	2	9	5	5	3	6	6	4	3
gi|116076548	SPD_1525	-	-	11	12	11	3	11	10	9	3	11	12	10	3
gi|116076549	MtsA	-	-	25	22	20	3	28	25	23	3	20	20	26	3
gi|116076550	RnhB	-	-	9	8	7	3	6	6	8	3	12	9	13	3
gi|116076551	LicD2	-	-	6	7	5	3	8	8	7	3	7	6	8	3
gi|116076553	SPD_0287	Off	-	4	3	6	3	3	1	4	2	0	0	0	0
gi|116076555	FtsB	-	-	2	2	2	3	3	1	2	2	2	2	1	2
gi|116076556	SPD_0587	-	-	4	3	4	3	4	4	4	3	6	6	5	3
gi|116076559	SPD_1264	Off	-	5	3	3	3	4	1	0	1	0	0	0	0
gi|116076560	SPD_1117	-	-	5	4	4	3	2	1	2	2	3	4	3	3
gi|116076561	MacB_1	-	-	9	9	7	3	6	6	5	3	7	7	4	3
gi|116076562	MurE2	-	-	1	2	2	2	2	2	2	3	2	2	2	3
gi|116076563	CbiO2	-	-	6	7	5	3	2	4	5	3	6	5	5	3
gi|116076568	CglB	-	-	3	0	6	2	0	0	0	0	0	0	0	0
gi|116076573	PfkA	-	-	12	13	12	3	9	12	12	3	15	16	17	3
gi|116076575	Pbp2A	-	-	11	16	16	3	26	25	27	3	22	22	21	3
gi|116076576	FabH	-	-	8	8	7	3	4	8	8	3	8	8	9	3
gi|116076578	IlvE	-	-	12	11	8	3	10	14	11	3	14	13	13	3
gi|116076579	LemA	-	-	14	12	12	3	13	13	11	3	14	14	13	3
gi|116076583	RecR	-	-	4	4	3	3	4	4	3	3	4	4	4	3
gi|116076584	SPD_0816	-	-	6	6	6	3	7	5	5	3	8	8	8	3
gi|116076585	MalA	-	-	2	2	2	3	2	1	2	2	3	2	5	3
gi|116076586	YlbL	-	-	11	10	8	3	9	11	11	3	13	10	14	3
gi|116076587	DeaD	-	-	19	24	21	3	23	20	19	3	23	24	25	3
gi|116076588	SPD_1350	-	-	4	3	3	3	4	2	3	3	2	2	0	2
gi|116076589	SPD_0496	-	-	9	8	7	3	0	6	7	2	6	6	7	3
gi|116076590	SPD_1197	-	-	19	21	18	3	11	19	18	3	25	21	22	3
gi|116076593	AroC	-	-	15	13	7	3	12	6	6	3	19	14	12	3
gi|116076594	SPD_0867	-	-	9	10	10	3	8	9	8	3	15	12	14	3
gi|116076596	NiaR	-	-	2	1	1	1	2	2	2	3	2	3	4	3
gi|116076598	SPD_0995	-	-	2	2	1	2	2	2	1	2	4	4	3	3
gi|116076600	PepX	-	-	13	16	14	3	18	18	15	3	19	19	21	3
gi|116076603	MarR_1	-	-	6	6	6	3	6	6	7	3	9	7	8	3
gi|116076604	SPD_0838	-	-	10	9	6	3	7	8	9	3	11	11	12	3
gi|116076605	RpsP	-	-	4	4	4	3	3	4	4	3	4	3	4	3
gi|116076607	DnaD	-	-	9	8	5	3	9	8	8	3	10	8	9	3
gi|116076611	Nth	-	-	3	4	3	3	2	2	3	3	1	1	2	1
gi|116076612	AroE	-	-	6	6	6	3	1	6	5	2	6	8	7	3
gi|116076613	SPD_0554	-	-	12	11	11	3	12	12	10	3	16	12	16	3
gi|116076614	PstB2_1	-	-	13	13	13	3	12	12	12	3	17	15	16	3
gi|116076616	Ppc	-	-	39	43	32	3	37	34	29	3	43	44	41	3
gi|116076618	SPD_1176	-	-	6	5	6	3	4	3	3	3	5	6	4	3
gi|116076621	AguA	-	-	6	6	6	3	1	7	6	2	4	5	5	3
gi|116076623	RpsM	-	-	18	18	16	3	17	19	18	3	18	17	19	3
gi|116076624	RsuA-1	-	-	9	9	10	3	10	6	7	3	9	9	7	3
gi|116076625	Xth	-	-	19	22	20	3	16	21	21	3	20	22	22	3
gi|116076626	RplX	-	-	8	7	6	3	11	8	10	3	9	10	10	3
gi|116076629	DnaA	-	-	12	11	10	3	2	8	5	3	11	9	12	3
gi|116076631	TyrS	-	-	24	20	24	3	13	18	19	3	26	24	21	3
gi|116076632	UlaB	-	-	1	2	2	2	0	0	0	0	2	1	2	2
gi|116076633	HtpX	-	-	3	3	2	3	2	2	2	3	6	3	2	3
gi|116076634	SPD_0582	-	-	4	2	4	3	1	2	3	2	3	4	4	3
gi|116076635	FabF	-	-	16	18	16	3	23	22	22	3	21	22	23	3
gi|116076636	AdcA	-	-	21	23	24	3	25	23	22	3	23	23	24	3
gi|116076637	ScrR	-	-	1	2	0	1	0	0	0	0	2	2	1	2
gi|116076638	PurH	-	-	20	23	17	3	9	12	13	3	11	8	8	3
gi|116076641	SPD_1621	-	-	9	7	10	3	11	10	8	3	18	17	17	3
gi|116076508	PhpP	Off	-	12	12	14	3	9	6	8	3	0	0	0	0
gi|116076643	SPD_1645	-	-	3	3	4	3	3	4	4	3	4	3	4	3
gi|116076644	SPD_0539	-	-	8	9	8	3	11	5	8	3	9	11	11	3
gi|116076645	SPD_2022	-	-	23	29	24	3	27	23	23	3	27	29	27	3
gi|116076646	SpeG	-	-	4	3	3	3	3	3	4	3	5	3	5	3
gi|116076647	MapP	-	-	3	3	4	3	0	5	6	2	9	8	9	3
gi|116076649	NrdE	-	-	33	37	36	3	36	33	31	3	37	36	36	3
gi|116076651	TrpG	-	-	8	7	7	3	7	5	6	3	6	6	8	3
gi|116076652	Tsf	-	-	24	25	22	3	28	27	25	3	30	31	30	3
gi|116076653	SPD_0160	-	-	4	4	4	3	3	2	2	3	3	3	3	3
gi|116076656	RecG	-	-	4	4	3	3	6	5	4	3	8	9	6	3
gi|116076657	YhgF	-	-	24	28	23	3	32	25	29	3	29	28	26	3
gi|116076520	PurF	Off	-	11	12	9	3	4	6	4	3	0	0	0	0
gi|116076660	Rnj	-	-	23	28	24	3	26	28	26	3	29	29	29	3
gi|116076664	SPD_1610	-	-	5	6	5	3	4	5	5	3	11	10	10	3
gi|116076665	SPD_0145	-	-	1	2	1	1	0	0	0	0	0	0	0	0
gi|116076666	GlnA	-	-	23	23	19	3	20	24	25	3	25	25	23	3
gi|116076671	SPD_1145	-	-	9	9	5	3	2	11	9	3	13	15	14	3
gi|116076674	Asp	-	-	3	3	3	3	6	4	5	3	3	4	6	3
gi|116076675	SPD_0735	-	-	5	5	6	3	7	7	7	3	9	9	8	3
gi|116076677	AliB	-	-	33	36	36	3	32	32	32	3	36	36	37	3
gi|116076678	HsdR	-	-	13	9	12	3	9	9	10	3	25	25	21	3
gi|116076681	SPD_0792	-	-	8	10	8	3	10	8	10	3	13	10	8	3
gi|116076685	SufD	-	-	14	15	14	3	14	15	15	3	17	15	16	3
gi|116076686	Def	-	-	14	12	13	3	16	14	13	3	15	15	16	3
gi|116076687	PhoB1	-	-	6	6	6	3	5	1	2	2	6	6	6	3
gi|116076688	RpsS	-	-	11	10	11	3	14	13	13	3	12	13	15	3
gi|116076689	YbaK	Off	Off	5	3	3	3	0	0	0	0	0	0	0	0
gi|116076535	SPD_1991	On	-	0	0	0	0	0	0	0	0	2	2	2	3
gi|116076691	AccB	-	-	6	6	6	3	5	6	5	3	6	6	6	3
gi|116076693	Cdd-1	-	-	3	3	3	3	3	3	3	3	3	3	2	3
gi|116076695	SpxB	-	-	40	42	41	3	46	44	44	3	44	45	45	3
gi|116076696	SPD_1619	-	-	21	20	17	3	17	22	22	3	25	23	24	3
gi|116076697	RnhC	-	-	5	5	5	3	0	4	5	2	6	7	7	3
gi|116076699	PepQ	-	-	16	15	14	3	16	16	16	3	15	16	15	3
gi|116076700	SdhB	-	-	2	2	2	3	2	2	2	3	3	3	3	3
gi|116076703	SPD_1588	-	-	3	5	3	3	2	3	2	3	4	4	4	3
gi|116076705	YidC	-	-	4	4	4	3	5	4	4	3	6	6	5	3
gi|116076706	SPD_1446	-	-	3	3	2	3	3	3	3	3	4	3	5	3
gi|116076709	SPD_1954	-	-	3	3	2	3	3	1	3	2	2	1	2	2
gi|116076710	SPD_1798	-	-	4	4	1	2	3	4	4	3	1	3	3	2
gi|116076711	PepP	-	-	14	15	11	3	16	15	15	3	13	15	15	3
gi|116076712	SPD_0671	-	-	15	17	13	3	16	16	14	3	12	12	10	3
gi|116076713	AspS	-	-	24	23	23	3	22	21	21	3	27	25	27	3
gi|116076714	SPD_0092	-	-	6	4	6	3	0	3	5	2	6	5	4	3
gi|116076715	ArAT	-	-	16	16	14	3	20	21	16	3	22	22	20	3
gi|116076717	SPD_1385	-	-	15	15	12	3	11	11	12	3	11	10	10	3
gi|116076719	AtpH	-	-	8	7	7	3	9	8	7	3	7	7	7	3
gi|116076540	BglA-2	Off	-	4	5	4	3	2	7	7	3	0	0	0	0
gi|116076723	PhtD	-	-	19	20	22	3	23	22	23	3	20	23	23	3
gi|116076569	SPD_1718	On	-	0	0	0	0	0	0	0	0	3	3	2	3
gi|116076582	PaaI	On	-	0	0	0	0	0	0	0	0	5	5	3	3
gi|116076727	Mfd	-	-	16	15	13	3	4	6	8	3	19	21	19	3
gi|116076730	ProA	-	-	15	14	15	3	6	15	16	3	13	15	13	3
gi|116076732	GyrB	-	-	14	16	13	3	24	20	19	3	18	18	20	3
gi|116076733	SPD_0696	-	-	3	3	3	3	3	3	2	3	3	3	3	3
gi|116076736	Rnj	-	-	22	24	22	3	27	27	25	3	24	25	27	3
gi|116076737	SPD_1329	-	-	8	7	7	3	7	7	6	3	6	5	6	3
gi|116076740	XerS	-	-	3	3	1	2	0	0	0	0	1	2	3	2
gi|116076744	SPD_1971	-	-	13	15	15	3	14	7	11	3	13	11	13	3
gi|116076747	RplM	-	-	9	10	10	3	11	11	10	3	11	11	12	3
gi|116076748	GlmU	-	-	11	13	12	3	14	14	12	3	13	14	14	3
gi|116076749	ArgF	-	-	15	12	12	3	12	15	10	3	15	15	14	3
gi|116076751	RimI	-	-	2	1	1	1	2	1	1	1	2	1	2	2
gi|116076752	CoaB	-	-	8	5	6	3	8	8	6	3	11	9	11	3
gi|116076753	ArtP_2	-	-	6	5	6	3	3	5	5	3	4	3	4	3
gi|116076754	SPD_0911	-	-	13	13	9	3	14	12	11	3	12	10	12	3
gi|116076755	Efp	-	-	8	8	8	3	13	11	7	3	10	11	10	3
gi|116076756	SPD_1528	-	-	10	10	9	3	2	10	9	3	11	11	9	3
gi|116076757	AroF	-	-	15	13	12	3	15	14	13	3	12	12	14	3
gi|116076758	SPD_1212	-	-	11	11	6	3	14	11	11	3	14	14	13	3
gi|116076760	SPD_0310	-	-	16	19	14	3	19	16	18	3	25	23	25	3
gi|116076761	RplS	-	-	10	11	8	3	13	12	12	3	11	13	12	3
gi|116076762	SPD_1801	Off	Off	3	3	3	3	0	0	0	0	0	0	0	0
gi|116076764	SPD_1786	-	-	3	2	2	3	1	2	2	2	3	3	3	3
gi|116076765	SPD_2025	-	-	20	19	16	3	5	17	17	3	16	16	18	3
gi|116076642	SPD_0925	-	Off	3	2	2	3	0	0	0	0	2	2	2	3
gi|116076768	GalU	-	-	18	20	19	3	17	22	21	3	21	21	20	3
gi|116076769	ThyA	-	-	5	7	6	3	5	7	7	3	7	7	7	3
gi|116076770	GlmS	-	-	22	26	22	3	28	26	24	3	28	29	31	3
gi|116076775	LuxS	-	-	8	8	7	3	9	8	8	3	9	9	9	3
gi|116076777	PepA	-	-	17	17	17	3	20	21	21	3	20	19	19	3
gi|116076779	AlAA	-	-	14	15	13	3	15	16	14	3	17	16	18	3
gi|116076780	AcoA	-	-	8	10	9	3	1	10	8	2	11	11	10	3
gi|116076781	Hup	-	-	11	11	9	3	10	10	10	3	10	10	11	3
gi|116076782	DnaI	-	-	9	9	7	3	9	7	8	3	10	7	9	3
gi|116076786	SPD_0981	-	-	5	5	3	3	2	4	4	3	6	6	6	3
gi|116076788	GlpK	-	-	20	20	19	3	15	15	16	3	19	18	19	3
gi|116076789	LysX1	-	-	18	17	18	3	18	18	14	3	22	23	23	3
gi|116076791	TyrA	-	-	10	11	8	3	4	7	6	3	8	10	11	3
gi|116076792	ClpP	-	-	8	8	8	3	8	8	8	3	8	8	8	3
gi|116076793	Psr	-	-	9	9	5	3	5	9	9	3	15	16	14	3
gi|116076794	FtsL	-	-	3	3	3	3	2	3	3	3	4	3	3	3
gi|116076797	FruAB	-	-	6	6	7	3	5	6	5	3	7	9	8	3
gi|116076798	NagB	-	-	15	14	14	3	19	17	17	3	15	15	17	3
gi|116076658	SPD_1552	-	-	4	4	0	2	3	3	2	3	0	0	0	0
gi|116076800	PaiA	-	-	4	3	3	3	3	2	3	3	2	2	2	3
gi|116076803	NusB	-	-	6	7	6	3	6	6	4	3	5	7	7	3
gi|116076804	LepA	-	-	23	23	22	3	27	24	23	3	23	24	23	3
gi|116076805	MetG	-	-	34	34	33	3	42	43	37	3	41	40	39	3
gi|116076808	GlyS	-	-	39	38	31	3	37	34	27	3	38	38	38	3
gi|116076809	NagA	-	-	18	18	16	3	19	19	17	3	17	17	18	3
gi|116076811	SPD_0394	-	-	8	8	7	3	8	7	7	3	7	7	7	3
gi|116076812	LivG	-	-	7	7	7	3	7	7	7	3	8	9	7	3
gi|116076813	SPD_0462	-	-	3	5	4	3	7	4	6	3	4	4	5	3
gi|116076814	DapA	-	-	11	12	11	3	11	13	13	3	11	12	14	3
gi|116076815	GlpO	-	-	30	31	30	3	36	29	32	3	31	36	39	3
gi|116076816	SPD_1487	-	-	6	6	6	3	3	7	6	3	8	8	7	3
gi|116076818	AdcC	-	-	5	5	6	3	6	5	6	3	7	7	8	3
gi|116076819	RadA	-	-	8	5	6	3	0	2	3	2	5	2	3	3
gi|116076820	Hom	-	-	25	23	21	3	21	24	24	3	27	26	26	3
gi|116076825	RimM	-	-	9	9	9	3	12	11	11	3	9	11	12	3
gi|116076680	RibB	On	-	0	0	0	0	0	0	0	0	4	3	4	3
gi|116076829	MCH	-	-	5	7	4	3	2	2	1	2	8	5	5	3
gi|116076830	SPD_0839	-	-	3	1	1	1	3	2	2	3	3	3	2	3
gi|116076832	PflA	-	-	5	4	5	3	5	4	5	3	8	5	3	3
gi|116076835	YutD	-	-	5	6	4	3	4	5	4	3	5	4	4	3
gi|116076836	SPD_0159	-	-	3	3	2	3	2	2	2	3	3	3	2	3
gi|116076837	GlgD	-	-	8	8	6	3	3	5	5	3	8	6	8	3
gi|116076841	GuaC	-	-	16	16	16	3	11	15	13	3	16	16	19	3
gi|116076842	SPD_0751	-	-	4	5	4	3	5	4	4	3	4	5	5	3
gi|116076844	DacA	-	-	4	5	5	3	5	4	4	3	5	5	6	3
gi|116076846	SPD_1559	-	-	11	12	4	3	9	9	6	3	16	15	16	3
gi|116076848	PrfB	-	-	12	11	11	3	4	11	12	3	16	16	13	3
gi|116076849	PstC2	-	-	2	2	2	3	2	1	2	2	2	2	2	3
gi|116076851	RecA	-	-	26	26	26	3	13	19	20	3	22	22	21	3
gi|116076853	ManA	-	-	11	11	9	3	13	11	11	3	12	12	12	3
gi|116076856	TrpD	-	-	4	5	4	3	0	0	3	1	3	3	2	3
gi|116076857	RecX	-	-	4	3	4	3	2	3	3	3	7	4	7	3
gi|116076858	MurE	-	-	19	22	18	3	24	22	20	3	20	19	24	3
gi|116076859	FtsZ	-	-	21	20	21	3	19	23	20	3	23	23	24	3
gi|116076861	PavA	-	-	5	8	7	3	9	12	11	3	13	14	13	3
gi|116076866	EutD	-	-	16	14	12	3	15	15	14	3	14	14	15	3
gi|116076868	SrlR	-	-	9	7	9	3	6	5	6	3	6	7	6	3
gi|116076869	RpoA	-	-	29	30	25	3	29	29	28	3	26	27	29	3
gi|116076874	AmiD	-	-	8	8	8	3	8	7	6	3	9	8	9	3
gi|116076875	SPD_2020	-	-	4	3	4	3	2	3	2	3	4	6	4	3
gi|116076879	LysA	-	-	13	13	11	3	3	11	9	3	11	13	14	3
gi|116076880	YlxR	-	-	6	5	4	3	4	4	4	3	4	5	4	3
gi|116076881	SPD_0622	-	-	6	7	7	3	8	7	5	3	5	5	6	3
gi|116076885	RpsL	-	-	9	9	9	3	10	10	8	3	12	12	12	3
gi|116076886	ClpE	-	-	22	23	16	3	26	23	19	3	28	26	22	3
gi|116076887	RpsN	-	-	2	2	2	3	6	3	5	3	2	3	2	3
gi|116076888	SPD_1308	-	-	12	13	13	3	15	14	10	3	15	15	15	3
gi|116076889	SPD_0754	-	-	4	4	4	3	0	1	2	1	4	4	3	3
gi|116076890	PacL	-	-	19	20	16	3	22	23	18	3	27	23	25	3
gi|116076891	TarJ	-	-	5	6	4	3	1	3	3	2	7	5	4	3
gi|116076690	Azr_2	-	Off	6	6	5	3	0	0	0	0	5	5	2	3
gi|116076897	CoaC	-	-	9	9	7	3	11	10	9	3	10	8	10	3
gi|116076898	MocA	-	-	6	6	3	3	9	6	3	3	8	8	7	3
gi|116076899	MapZ	-	-	12	13	12	3	14	14	16	3	15	16	14	3
gi|116076900	SPD_1382	-	-	11	12	12	3	10	11	13	3	13	12	12	3
gi|116076901	SerS	-	-	27	27	26	3	21	29	26	3	27	27	27	3
gi|116076902	GlgC	-	-	4	5	3	3	1	3	3	2	5	4	5	3
gi|116076906	Pbp1A	-	-	23	24	25	3	36	36	33	3	35	38	37	3
gi|116076907	TrxB	-	-	9	8	5	3	7	7	5	3	8	8	5	3
gi|116076908	SPD_0827	-	-	4	4	3	3	4	5	3	3	5	4	4	3
gi|116076909	YajC	-	-	3	3	4	3	2	2	2	3	3	2	2	3
gi|116076910	SPD_0114	-	-	6	5	4	3	5	5	5	3	7	7	4	3
gi|116076911	AspC	-	-	14	14	12	3	20	18	16	3	17	17	19	3
gi|116076912	GalE-1	-	-	19	21	18	3	23	21	22	3	20	22	23	3
gi|116076914	YchF	-	-	20	23	20	3	15	21	22	3	19	22	21	3
gi|116076915	Udk	-	-	3	3	2	3	3	2	2	3	8	7	8	3
gi|116076916	CelA	Off	Off	13	10	14	3	0	0	0	0	0	0	0	0
gi|116076918	ValS	-	-	41	46	38	3	49	49	43	3	49	50	51	3
gi|116076919	Iga	-	-	86	77	86	3	86	85	93	3	78	89	90	3
gi|116076920	SPD_0855	-	-	6	2	3	3	3	3	5	3	4	5	6	3
gi|116076921	AfuC	-	-	3	3	2	3	2	2	2	3	4	5	3	3
gi|116076924	DeoB	-	-	17	19	17	3	20	21	21	3	19	20	21	3
gi|116076925	PyrF	-	-	3	5	3	3	3	1	2	2	8	7	8	3
gi|116076929	OatA	-	-	2	3	3	3	7	6	4	3	8	6	7	3
gi|116076701	YhhT_1	On	-	0	0	0	0	0	0	0	0	2	2	2	3
gi|116076935	SPD_1144	-	-	4	3	2	3	2	2	2	3	4	4	4	3
gi|116076936	SPD_0180	-	-	5	5	5	3	3	3	3	3	3	6	5	3
gi|116076938	SPD_1712	-	-	4	3	4	3	2	2	2	3	3	3	3	3
gi|116076939	MsrAB1	-	-	15	19	14	3	18	15	15	3	17	15	17	3
gi|116076943	SPD_1899	-	-	12	11	11	3	9	6	9	3	7	7	7	3
gi|116076944	LacD	-	-	17	15	15	3	14	15	15	3	15	15	15	3
gi|116076948	SPD_1662	-	-	4	4	3	3	6	5	6	3	7	8	8	3
gi|116076950	MreC	-	-	11	13	12	3	12	10	11	3	10	10	11	3
gi|116076951	SPD_1079	-	-	14	16	18	3	17	15	14	3	25	21	26	3
gi|116076952	SPD_1741	-	-	12	12	10	3	4	11	11	3	13	13	15	3
gi|116076953	SPD_0463	-	-	8	8	7	3	9	8	6	3	7	7	9	3
gi|116076955	RsmF	Off	Off	4	3	3	3	0	0	0	0	0	0	0	0
gi|116076957	Adh	-	-	6	6	3	3	7	9	8	3	9	6	8	3
gi|116076960	CysA	-	-	3	3	3	3	2	2	2	3	3	4	3	3
gi|116076961	SPD_1411	-	-	6	8	7	3	7	7	7	3	7	7	7	3
gi|116076962	PhnA	-	-	2	2	2	3	2	2	2	3	5	5	4	3
gi|116076963	SPD_0376	-	-	3	2	2	3	3	2	2	3	3	3	4	3
gi|116076965	CysK	-	-	23	22	19	3	18	21	20	3	14	11	16	3
gi|116076966	SPD_0574	-	-	3	3	4	3	3	2	4	3	4	5	4	3
gi|116076968	PurK	-	-	7	8	7	3	5	7	7	3	3	3	5	3
gi|116076969	SPD_0547	-	-	16	17	14	3	19	18	20	3	19	19	20	3
gi|116076970	Spr0710	-	-	4	4	4	3	0	5	5	2	7	5	6	3
gi|116076971	SPD_0069	-	Off	3	2	2	3	0	0	0	0	1	1	2	1
gi|116076972	MutL	-	-	7	2	3	3	9	6	3	3	11	12	11	3
gi|116076973	AtpC	-	-	6	7	5	3	7	6	7	3	4	6	7	3
gi|116076974	FtsY	-	-	11	12	12	3	13	11	8	3	14	15	17	3
gi|116076975	PotA	-	-	3	3	2	3	2	2	3	3	7	4	4	3
gi|116076976	SPD_1122	-	-	14	13	13	3	3	5	5	3	5	5	4	3
gi|116076979	SPD_0266	-	-	9	10	6	3	7	6	7	3	8	6	7	3
gi|116076985	SPD_1263	-	-	5	2	2	3	3	2	3	3	4	4	4	3
gi|116076986	SPD_1153	-	-	9	10	7	3	10	14	12	3	13	12	12	3
gi|116076987	SPD_1249	-	-	5	3	4	3	5	2	3	3	4	4	4	3
gi|116076988	ScrB	-	-	9	10	9	3	12	8	10	3	8	8	10	3
gi|116076992	SPD_1466	-	-	4	4	4	3	3	4	4	3	5	4	5	3
gi|116076993	SPD_0956	-	-	8	8	7	3	7	3	5	3	7	7	4	3
gi|116076994	SPD_1360	-	-	3	3	3	3	2	3	3	3	3	3	3	3
gi|116076997	PstB2_2	-	-	18	17	16	3	15	16	18	3	20	19	21	3
gi|116076998	GlmM	-	-	25	23	20	3	18	24	23	3	25	25	23	3
gi|116076999	RumA-2	-	-	9	10	7	3	7	12	9	3	11	12	10	3
gi|116077001	SPD_1644	-	-	3	2	1	2	1	2	2	2	3	2	1	2
gi|116077003	SPD_1092	-	-	3	5	3	3	3	3	1	2	2	2	3	3
gi|116077004	SPD_1294	-	-	4	3	3	3	3	2	4	3	2	2	1	2
gi|116077005	SPD_1961	-	-	6	6	7	3	7	6	7	3	8	8	7	3
gi|116077007	SPD_1762	-	-	8	8	9	3	5	9	10	3	12	11	12	3
gi|116077008	DnaB	-	-	8	5	4	3	1	4	3	2	5	5	3	3
gi|116077009	SpxA	-	-	5	4	3	3	5	3	3	3	2	4	4	3
gi|116077011	RpoB	-	-	73	75	71	3	74	73	75	3	76	76	75	3
gi|116077012	CtsR	-	-	6	4	4	3	6	5	4	3	6	7	6	3
gi|116077013	Asd	-	-	15	15	14	3	15	15	14	3	13	12	14	3
gi|116077014	MacP	-	-	4	4	4	3	6	7	6	3	5	4	3	3
gi|116077015	LivF	-	-	12	14	12	3	14	13	13	3	15	15	14	3
gi|116077016	EstA	-	-	5	5	5	3	4	4	5	3	5	5	5	3
gi|116077017	SPD_1979	-	-	10	11	8	3	4	10	8	3	9	8	10	3
gi|116077018	Gap	-	-	23	23	22	3	26	24	22	3	23	24	24	3
gi|116077019	SPD_1706	-	-	10	9	8	3	12	10	10	3	10	10	9	3
gi|116077020	TrmU	-	-	5	4	3	3	6	4	4	3	5	5	5	3
gi|116077021	NrdG	-	-	1	3	1	1	0	0	0	0	0	0	0	0
gi|116077022	RpiA	-	-	7	6	6	3	7	6	5	3	9	9	8	3
gi|116077023	MetQ	-	-	21	22	16	3	12	19	20	3	21	19	20	3
gi|116077024	SPD_1365	Off	-	3	3	3	3	0	2	2	2	0	0	0	0
gi|116077025	GatA	-	-	23	23	23	3	22	23	22	3	22	22	23	3
gi|116077026	SmpB	-	-	5	4	3	3	7	6	3	3	4	5	4	3
gi|116077030	SPD_1034	-	-	8	7	6	3	8	8	7	3	10	10	10	3
gi|116077031	SPD_1395	-	-	5	5	5	3	6	6	6	3	5	5	5	3
gi|116077032	FucI	-	-	1	5	2	2	7	6	8	3	13	11	11	3
gi|116077034	RpmI	-	-	3	2	3	3	3	4	4	3	5	5	5	3
gi|116077035	DnaX	-	-	8	8	7	3	9	8	8	3	13	12	10	3
gi|116077038	SPD_2016	-	-	17	18	13	3	7	15	13	3	18	17	19	3
gi|116077042	LacR2	-	-	9	11	9	3	7	8	9	3	13	11	13	3
gi|116077043	SPD_1061	-	-	9	7	7	3	9	7	7	3	12	11	13	3
gi|116077045	OxlT	-	-	2	2	1	2	1	2	2	2	0	0	0	0
gi|116077046	LigA	-	-	18	20	18	3	23	22	19	3	29	28	29	3
gi|116077047	DltA	-	-	7	6	5	3	6	6	5	3	8	7	6	3
gi|116077050	GuaA	-	-	29	30	30	3	28	24	26	3	32	34	39	3
gi|116077051	Pdp	-	-	6	6	6	3	0	2	4	2	8	10	8	3
gi|116077053	YdaF_5	-	-	3	4	0	2	3	4	3	3	4	3	4	3
gi|116077059	GlgA	-	-	6	5	4	3	1	4	3	2	8	8	8	3
gi|116077061	SPD_1366	-	-	4	4	2	3	3	4	2	3	2	3	3	3
gi|116077062	UvrB	-	-	9	10	11	3	12	11	13	3	24	16	18	3
gi|116077063	GpmB	-	-	10	10	11	3	8	9	8	3	10	10	10	3
gi|116077066	GreA	-	-	12	12	11	3	13	13	12	3	13	13	12	3
gi|116077067	SPD_0040	-	-	2	2	2	3	2	3	2	3	2	3	3	3
gi|116077068	Pbp1B	-	-	16	16	15	3	19	20	16	3	23	22	22	3
gi|116077069	SPD_1397	-	-	5	5	4	3	6	5	6	3	5	6	6	3
gi|116076721	GatA	-	Off	3	3	2	3	0	0	0	0	4	4	5	3
gi|116077074	DnaK	-	-	62	63	60	3	68	65	65	3	63	68	67	3
gi|116077075	IlvA	-	-	15	15	9	3	4	13	8	3	15	14	13	3
gi|116077077	CarB	-	-	19	19	22	3	19	17	15	3	30	23	27	3
gi|116077078	RsgA	-	-	4	5	4	3	1	4	3	2	4	3	2	3
gi|116077079	PurL	-	-	29	37	28	3	12	19	15	3	10	4	9	3
gi|116077082	DacC	-	-	7	7	5	3	5	8	8	3	9	12	8	3
gi|116077083	SPD_1829	-	-	4	3	2	3	4	3	2	3	7	5	6	3
gi|116077084	SPD_0373	-	-	11	11	11	3	8	9	8	3	8	6	7	3
gi|116077086	ComA	Off	Off	16	16	16	3	0	0	0	0	0	0	0	0
gi|116077087	SPD_1717	-	-	4	4	5	3	4	5	5	3	8	7	8	3
gi|116077089	FabK	-	-	19	17	15	3	19	17	17	3	18	17	17	3
gi|116077092	SPD_0173	-	-	8	7	7	3	9	9	8	3	10	11	13	3
gi|116077093	Amy	-	-	1	3	2	2	6	5	6	3	3	7	5	3
gi|116077095	AdhA	-	-	11	8	7	3	12	8	8	3	9	8	8	3
gi|116077097	SPD_0115	-	-	12	13	11	3	9	12	9	3	14	15	13	3
gi|116077098	PhtE	-	-	36	35	37	3	45	42	38	3	46	46	41	3
gi|116077099	GapN	-	-	34	33	31	3	31	35	35	3	35	34	36	3
gi|116077101	SdhA	-	-	5	6	5	3	6	4	4	3	6	8	7	3
gi|116077102	Map	-	-	15	13	13	3	11	13	13	3	13	13	14	3
gi|116077105	SPD_1330	-	-	3	3	3	3	2	3	3	3	4	4	3	3
gi|116077106	SPD_0414	-	-	8	10	9	3	8	6	8	3	15	17	16	3
gi|116077108	SPD_1099	-	-	7	6	6	3	8	8	7	3	8	11	11	3
gi|116077111	ParE	-	-	11	13	11	3	14	14	14	3	16	16	16	3
gi|116076724	GatB	-	On	0	0	0	0	5	5	6	3	0	0	0	0
gi|116077115	ArgS	-	-	42	49	47	3	47	47	43	3	47	50	48	3
gi|116077119	SPD_1416	-	-	7	7	8	3	3	6	9	3	9	10	10	3
gi|116077120	AtpD	-	-	29	30	28	3	27	34	33	3	29	31	32	3
gi|116077121	RplT	-	-	6	6	6	3	7	7	7	3	7	7	7	3
gi|116077124	SPD_1794	-	-	15	14	14	3	6	12	12	3	12	15	14	3
gi|116076724;gi|116077123	protein group	-	Off	4	4	4	3	0	0	0	0	4	3	4	3
gi|116077126	BglA	-	-	4	5	6	3	1	6	5	2	10	12	12	3
gi|116077129	ThiD	-	-	5	5	4	3	7	5	4	3	8	8	7	3
gi|116077130	HsdM	-	-	23	22	21	3	20	22	22	3	23	25	24	3
gi|116077131	AmiF	-	-	15	16	16	3	11	19	16	3	16	15	17	3
gi|116077135	SPD_1094	-	-	5	5	3	3	3	5	3	3	6	5	6	3
gi|116077136	SPD_1277	-	Off	7	8	5	3	0	1	1	0	2	2	1	2
gi|116077137	Tmk	-	-	12	10	7	3	10	11	11	3	13	14	14	3
gi|116077140	SPD_0074	-	-	5	6	5	3	7	7	8	3	8	9	9	3
gi|116077141	IlvD	-	-	27	28	23	3	30	28	29	3	25	28	28	3
gi|116077143	SPD_0593	-	-	26	25	26	3	27	24	22	3	26	25	25	3
gi|116077146	VanY	-	-	12	13	11	3	13	10	11	3	11	13	12	3
gi|116077148	SPD_1377	Off	Off	2	2	2	3	0	0	0	0	0	0	0	0
gi|116077149	ArgR	-	-	2	3	3	3	2	1	2	2	3	2	2	3
gi|116077150	PstB1	-	-	1	2	2	2	0	0	0	0	0	0	0	0
gi|116077151	SPD_1200	-	-	3	4	5	3	3	2	3	3	5	4	6	3
gi|116077156	SPD_0517	-	-	5	3	3	3	2	1	1	1	4	4	4	3
gi|116077157	RpsD	-	-	23	23	22	3	24	25	25	3	26	26	25	3
gi|116077159	SPD_1631	-	-	4	5	4	3	4	3	7	3	6	8	7	3
gi|116077160	SPD_1571	-	-	22	25	24	3	34	34	28	3	27	28	29	3
gi|116077161	Pgk	-	-	34	33	33	3	33	37	36	3	35	34	36	3
gi|116077164	InfB	-	-	43	40	40	3	39	39	39	3	44	46	42	3
gi|116077165	ThiN	-	-	8	10	9	3	10	8	7	3	10	10	11	3
gi|116077166	SPD_2043	-	-	12	11	11	3	1	2	3	2	15	16	15	3
gi|116077167	SPD_1727	-	-	6	6	5	3	3	5	6	3	6	6	6	3
gi|116077168	SPD_2060	-	-	2	3	3	3	2	3	3	3	4	3	5	3
gi|116077170	Cbf1	-	-	15	16	11	3	15	15	13	3	14	13	14	3
gi|116077172	MurI	-	-	3	2	3	3	1	1	2	1	4	5	3	3
gi|116077174	SPD_0719	-	-	3	3	3	3	3	3	2	3	4	3	2	3
gi|116077178	SPD_1836	-	-	3	5	5	3	5	5	4	3	5	5	4	3
gi|116077179	SPD_1226	-	-	18	18	20	3	18	16	17	3	25	23	23	3
gi|116077180	BlpS	Off	Off	6	5	3	3	0	0	0	0	0	0	0	0
gi|116077181	SPD_1788	-	-	10	10	9	3	11	9	10	3	10	10	10	3
gi|116077184	SPD_1516	-	-	3	3	4	3	2	2	2	3	4	4	5	3
gi|116077185	SPD_0033	-	-	13	13	10	3	14	12	13	3	15	14	16	3
gi|116077186	Pgi	-	-	31	35	32	3	28	39	37	3	37	38	38	3
gi|116077187	SPD_0987	-	-	6	4	5	3	4	5	5	3	5	5	4	3
gi|116077188	RadC	Off	Off	5	2	10	3	0	0	0	0	0	0	0	0
gi|116077189	XylS	-	-	27	27	24	3	33	29	23	3	25	26	25	3
gi|116077191	TopA	-	-	21	24	20	3	38	34	32	3	34	33	36	3
gi|116077195	FabM	-	-	13	12	12	3	10	10	10	3	11	10	9	3
gi|116077196	TadA	-	-	2	1	2	2	1	2	2	2	3	3	2	3
gi|116077197	RplL	-	-	17	17	17	3	23	18	19	3	16	16	18	3
gi|116077198	TrpB	-	-	14	14	12	3	2	6	8	3	8	8	7	3
gi|116077199	PurB	-	-	33	35	32	3	26	37	35	3	33	33	36	3
gi|116077200	SPD_2051	-	-	2	3	0	2	0	0	0	0	0	0	0	0
gi|116077201	FtsX	-	-	9	10	9	3	9	9	8	3	11	11	12	3
gi|116077203	SPD_0576	-	-	6	7	6	3	7	7	7	3	8	7	7	3
gi|116077206	ScpB	-	-	7	8	6	3	6	5	4	3	6	4	6	3
gi|116077207	SPD_0651	-	-	1	1	2	1	0	0	0	0	2	1	1	1
gi|116077209	SPD_1171	-	-	6	5	5	3	5	7	6	3	7	7	8	3
gi|116077210	SPD_1875	-	-	9	10	9	3	10	9	8	3	7	7	6	3
gi|116077211	AdcR	-	-	5	5	5	3	6	6	6	3	6	6	6	3
gi|116077212	GroEL	-	-	35	35	35	3	36	35	35	3	37	38	37	3
gi|116077213	GlyQ	-	-	12	12	9	3	9	10	10	3	12	11	11	3
gi|116077214	RpoD	-	-	20	18	18	3	14	19	18	3	20	20	19	3
gi|116077218	Gid	-	-	15	15	16	3	9	19	17	3	17	18	16	3
gi|116077220	SPD_0220	-	-	3	3	3	3	0	2	2	2	2	2	2	3
gi|116077221	SPD_0699	-	-	4	3	2	3	3	2	3	3	3	3	3	3
gi|116077223	PrmA	-	-	7	6	5	3	11	10	9	3	8	8	8	3
gi|116077224	DapD	-	-	10	12	11	3	12	10	11	3	10	11	13	3
gi|116077225	AroA	-	-	7	4	4	3	3	2	2	3	7	7	4	3
gi|116077226	RplJ	-	-	18	18	17	3	19	17	18	3	18	17	18	3
gi|116077228	PepS	-	-	25	27	26	3	24	30	28	3	31	29	30	3
gi|116077229	FolP	-	-	6	7	7	3	0	8	6	2	10	9	6	3
gi|116077230	PolA	-	-	30	31	28	3	36	32	28	3	32	36	34	3
gi|116077231	CbpJ_2	-	-	3	4	4	3	3	1	2	2	5	5	6	3
gi|116077232	AppB	Off	-	2	2	2	3	2	2	1	2	0	0	0	0
gi|116077233	Bta	-	-	11	11	11	3	12	11	10	3	11	10	13	3
gi|116077234	Gmk	-	-	8	8	7	3	5	4	5	3	7	6	7	3
gi|116077235	ThiI	-	-	19	14	13	3	5	14	17	3	17	15	18	3
gi|116076725	SPD_0066	-	Off	7	7	6	3	0	0	0	0	4	3	3	3
gi|116077237	GpmA	-	-	19	19	19	3	28	20	21	3	21	23	24	3
gi|116077238	Vex2	-	-	3	3	3	3	3	3	3	3	3	3	3	3
gi|116077239	RpsJ	-	-	11	11	11	3	13	13	13	3	12	13	12	3
gi|116077240	CbpD	Off	Off	5	5	5	3	0	0	0	0	0	0	0	0
gi|116077242	RpoE	-	-	4	4	4	3	5	3	3	3	5	4	5	3
gi|116077243	SPD_0922	-	-	1	2	1	1	3	5	4	3	2	3	5	3
gi|116077244	SPD_0705	-	-	15	17	9	3	18	17	15	3	14	17	17	3
gi|116077245	Nox	-	-	23	25	23	3	21	25	23	3	25	24	24	3
gi|116077246	MutY	-	-	4	4	2	3	2	4	6	3	6	6	4	3
gi|116077247	ProWX	-	-	9	9	7	3	2	9	10	3	10	14	10	3
gi|116077249	LysY	-	-	9	10	8	3	8	9	11	3	14	10	11	3
gi|116077250	SPD_0742	-	-	2	2	2	3	2	2	2	3	2	2	2	3
gi|116077251	RimP	-	-	5	6	6	3	7	6	6	3	6	6	6	3
gi|116077252	GyrA	-	-	32	32	31	3	36	39	36	3	34	30	32	3
gi|116077253	SPD_1984	-	-	20	21	19	3	13	20	18	3	23	22	23	3
gi|116077254	LacG-2	-	-	8	10	8	3	11	7	11	3	8	9	11	3
gi|116077255	SPD_0765	-	-	5	5	4	3	4	4	4	3	4	3	3	3
gi|116077257	Hpt	-	-	14	15	13	3	16	17	15	3	17	18	17	3
gi|116077258	RrmA	-	-	3	4	3	3	2	2	2	3	5	7	2	3
gi|116077259	SPD_0182	-	Off	2	2	2	3	0	0	0	0	1	2	1	1
gi|116077261	SPD_0098	-	-	2	2	2	3	2	2	2	3	4	6	5	3
gi|116077263	PyrDa	-	-	13	13	13	3	12	14	12	3	15	16	15	3
gi|116077264	SPD_1241	-	-	9	8	6	3	8	6	8	3	5	6	7	3
gi|116077271	SPD_1280	-	-	5	5	4	3	3	3	4	3	5	3	6	3
gi|116077274	DegP	-	-	14	15	10	3	15	13	11	3	9	10	11	3
gi|116077275	Rnz	-	-	12	11	9	3	16	14	16	3	14	11	13	3
gi|116077279	Hydrolase	-	-	12	13	12	3	15	14	13	3	19	18	18	3
gi|116077281	SPD_1767	-	-	4	2	5	3	5	4	4	3	4	3	4	3
gi|116077283	SPD_1854	-	-	4	4	5	3	1	5	4	2	7	7	6	3
gi|116077284	RelA	-	-	21	23	18	3	21	16	15	3	18	20	21	3
gi|116077285	TcyC	-	-	15	15	15	3	13	12	12	3	14	14	12	3
gi|116077289	PtsH	-	-	5	5	5	3	4	4	4	3	4	4	5	3
gi|116077292	Gor	-	-	17	17	16	3	14	20	19	3	16	17	19	3
gi|116077294	MvaA	-	-	5	6	5	3	1	5	4	2	5	3	4	3
gi|116077295	SaeR	-	-	3	3	3	3	2	2	2	3	3	3	5	3
gi|116077296	SPD_1672	-	-	1	1	2	1	2	1	1	1	3	2	2	3
gi|116077297	Ung	-	-	4	5	3	3	3	4	4	3	6	6	7	3
gi|116077298	SPD_1323	-	-	2	2	1	2	0	0	0	0	0	0	0	0
gi|116076728	SPD_1075	On	-	0	0	0	0	0	0	0	0	2	2	2	3
gi|116076766	PurC	Off	-	13	15	8	3	4	6	3	3	0	0	0	0
gi|116077301	RplC	-	-	10	10	11	3	12	14	11	3	12	13	14	3
gi|116077305	SPD_1605	Off	Off	2	2	3	3	0	0	0	0	0	0	0	0
gi|116077306	NrdR	-	-	3	3	2	3	3	2	3	3	4	3	3	3
gi|116077307	SPD_1580	-	-	4	4	4	3	1	3	4	2	6	5	2	3
gi|116077311	ScrK	-	-	9	9	10	3	4	9	9	3	10	11	13	3
gi|116077312	RpmD	-	-	5	5	5	3	5	5	5	3	5	5	5	3
gi|116077313	ComFA	-	-	3	0	5	2	0	0	0	0	0	0	0	0
gi|116077314	HrcA	-	-	6	7	7	3	5	5	4	3	10	8	7	3
gi|116077315	MtnN	-	-	3	3	1	2	4	2	3	3	4	4	4	3
gi|116077316	RpsF	-	-	9	9	9	3	11	9	9	3	9	9	9	3
gi|116077317	PdhB	-	-	9	8	10	3	6	9	9	3	11	11	12	3
gi|116077322	SPD_1450	-	-	4	4	4	3	0	2	1	1	3	3	5	3
gi|116077323	RplU	-	-	5	4	4	3	6	6	6	3	5	5	4	3
gi|116077325	SPD_0797	-	-	2	2	1	2	0	0	0	0	0	0	0	0
gi|116077326	RpsR	-	-	11	11	12	3	13	13	13	3	11	13	12	3
gi|116077327	LplA	-	-	12	11	5	3	14	11	11	3	15	12	12	3
gi|116077328	FusA	-	-	45	47	45	3	51	52	49	3	48	49	49	3
gi|116077329	GpmB	-	-	6	6	2	3	5	6	6	3	8	8	5	3
gi|116077331	Tig	-	-	32	31	30	3	33	30	27	3	30	29	32	3
gi|116077333	MnmA	-	-	10	12	10	3	17	18	15	3	17	16	21	3
gi|116077334	RpsO_2	-	-	2	2	2	3	2	1	3	2	4	4	3	3
gi|116077335	SPD_1742	-	-	2	2	2	3	2	1	2	2	3	3	3	3
gi|116077336	SPD_1199	-	-	6	7	4	3	7	6	5	3	6	6	6	3
gi|116077337	SPD_1136	-	-	9	9	9	3	6	7	6	3	6	7	8	3
gi|116077338	Era	-	-	16	12	5	3	14	14	11	3	17	13	13	3
gi|116077339	ThrC	-	-	24	26	25	3	30	26	27	3	25	27	27	3
gi|116077340	ProB	-	-	3	4	2	3	3	3	3	3	3	3	3	3
gi|116077341	CpoA	-	-	7	7	1	2	8	6	7	3	9	11	11	3
gi|116077342	Lys1	-	-	10	10	9	3	8	9	9	3	10	9	10	3
gi|116077343	SPD_1785	-	-	2	3	5	3	1	1	2	1	5	6	5	3
gi|116077344	Eno	-	-	30	31	30	3	31	30	30	3	30	30	32	3
gi|116077350	SPD_0998	-	-	19	24	22	3	24	23	22	3	28	26	24	3
gi|116077352	YdiC	-	-	6	5	4	3	7	5	7	3	7	8	7	3
gi|116077353	LytA	-	-	15	15	13	3	15	12	13	3	13	14	16	3
gi|116077356	Trx	-	-	10	11	11	3	10	11	10	3	11	11	11	3
gi|116077359	CglA	Off	Off	18	16	17	3	0	0	0	0	0	0	0	0
gi|116077361	TruA	-	-	6	6	5	3	7	4	6	3	9	8	9	3
gi|116077365	SPD_1659	-	-	6	6	5	3	5	5	5	3	5	6	6	3
gi|116077368	SPD_1524	-	-	8	8	8	3	7	8	8	3	8	7	8	3
gi|116077372	SPD_0959	-	-	3	2	3	3	3	2	2	3	2	4	3	3
gi|116077374	TpiA	-	-	11	12	12	3	12	11	11	3	14	14	15	3
gi|116077377	PvaA	-	-	2	3	1	2	2	4	1	2	5	4	3	3
gi|116077378	FabZ	-	-	7	6	8	3	6	8	7	3	9	8	7	3
gi|116077379	PabB	-	-	13	13	11	3	18	16	14	3	15	15	17	3
gi|116077380	VicX	-	-	6	6	5	3	4	5	5	3	11	5	5	3
gi|116077384	SPD_1778	-	-	9	9	9	3	0	5	6	2	13	14	11	3
gi|116077385	DltC	-	-	4	3	4	3	4	4	4	3	3	4	3	3
gi|116077386	TrpS	-	-	13	12	10	3	10	9	9	3	15	16	12	3
gi|116077387	EcfA1_1	-	-	6	4	6	3	10	13	9	3	11	12	12	3
gi|116077391	SPD_1286	-	-	9	7	8	3	8	8	6	3	10	10	11	3
gi|116077392	ClgD	-	-	2	1	2	2	0	0	0	0	0	0	0	0
gi|116077393	SPD_1388	-	-	8	8	6	3	5	7	7	3	9	8	8	3
gi|116077394	SPD_0035	-	-	2	1	2	2	0	0	0	0	0	0	0	0
gi|116077395	PyrB	-	-	15	15	13	3	9	16	13	3	16	16	16	3
gi|116077398	SPD_0681	-	-	3	3	3	3	3	3	3	3	3	3	3	3
gi|116077401	PpaC	-	-	17	17	16	3	17	17	17	3	17	17	17	3
gi|116077402	BudA	-	-	5	4	3	3	5	5	4	3	6	4	8	3
gi|116077405	DnaJ	-	-	9	9	6	3	7	8	6	3	7	6	9	3
gi|116077407	CshA_1	-	-	6	5	2	3	6	5	3	3	5	6	7	3
gi|116077408	Ddl	-	-	18	18	13	3	19	20	18	3	18	19	22	3
gi|116077409	GidB	-	-	6	5	5	3	6	5	6	3	7	7	7	3
gi|116077413	RecN	-	-	15	13	12	3	13	15	13	3	20	18	21	3
gi|116077414	TrpC	-	-	7	7	6	3	1	2	3	2	5	5	5	3
gi|116077415	Gno	-	-	1	2	0	1	0	2	1	1	0	0	0	0
gi|116077417	PdxK	-	-	7	8	7	3	6	7	7	3	9	9	7	3
gi|116077418	SPD_1064	-	-	3	3	2	3	1	1	2	1	3	2	4	3
gi|116077419	MurA-2	-	-	23	25	21	3	13	20	22	3	22	22	21	3
gi|116077420	DnaE	-	-	8	8	6	3	6	6	7	3	21	18	19	3
gi|116077421	SecG	-	-	2	2	2	3	3	2	2	3	3	3	2	3
gi|116077422	AcpP	-	-	2	2	2	3	2	2	2	3	2	2	2	3
gi|116077424	TrmE	-	-	16	19	12	3	19	20	18	3	19	16	16	3
gi|116077425	MalQ	-	-	12	11	13	3	19	14	14	3	18	21	22	3
gi|116077426	SPD_0286	-	-	3	3	4	3	2	2	2	3	3	3	4	3
gi|116077428	WrbA	Off	Off	2	2	3	3	0	0	0	0	0	0	0	0
gi|116077430	SPD_0585	-	-	9	8	8	3	11	10	10	3	9	9	8	3
gi|116077433	Frr	-	-	19	16	17	3	16	14	15	3	12	11	14	3
gi|116077434	LicD1	-	-	1	1	2	1	3	3	2	3	3	3	4	3
gi|116077435	SPD_0028	-	-	2	0	1	1	0	0	0	0	0	0	0	0
gi|116077436	AroB	-	-	9	9	4	3	5	5	4	3	9	9	8	3
gi|116077438	PheS	-	-	14	12	10	3	11	13	10	3	12	12	11	3
gi|116077442	SPD_0657	-	-	5	2	2	3	5	4	5	3	5	5	7	3
gi|116077445	Rny	-	-	22	24	23	3	28	26	27	3	27	27	27	3
gi|116077446	Pyk	-	-	37	39	39	3	42	42	44	3	42	42	44	3
gi|116077448	FruK	-	-	11	10	9	3	4	10	9	3	11	9	13	3
gi|116077450	SPD_0093	-	-	4	3	3	3	1	3	5	2	8	5	7	3
gi|116077451	NadC	Off	-	4	6	5	3	0	4	3	2	0	0	0	0
gi|116077453	SPD_1351	-	-	10	9	8	3	4	5	5	3	16	15	15	3
gi|116077455	Ssb_1	-	-	10	10	10	3	9	9	8	3	11	11	11	3
gi|116077457	SPD_0645	-	-	15	13	9	3	15	15	14	3	16	15	18	3
gi|116077459	MetA	-	-	3	2	1	2	0	0	0	0	0	0	0	0
gi|116077461	SPD_0688	-	-	6	5	7	3	5	5	6	3	9	7	9	3
gi|116077463	NrdD	-	-	26	26	17	3	17	14	17	3	20	21	18	3
gi|116077464	RheB	-	-	15	15	16	3	6	16	14	3	17	16	17	3
gi|116077465	SPD_0161	-	-	5	4	4	3	4	4	4	3	4	4	5	3
gi|116077467	MalR	-	-	8	8	6	3	4	2	3	3	5	5	6	3
gi|116077468	SPD_1296	-	-	6	6	6	3	8	8	7	3	8	7	8	3
gi|116077469	EzrA	-	-	22	19	17	3	26	25	22	3	25	25	27	3
gi|116077470	AguB	-	-	8	9	7	3	3	7	7	3	8	8	10	3
gi|116077471	TrmD	-	-	5	6	4	3	3	6	6	3	5	6	6	3
gi|116077472	SPD_0913	-	-	16	20	14	3	11	20	19	3	15	15	13	3
gi|116077479	SPD_1378	-	-	9	8	10	3	10	7	10	3	9	9	11	3
gi|116077480	SPD_0646	-	-	8	9	9	3	8	9	9	3	9	10	9	3
gi|116077483	SPD_0803	-	-	1	2	1	1	0	0	0	0	0	0	0	0
gi|116077484	RpmG	-	-	2	2	2	3	4	3	3	3	3	3	3	3
gi|116077485	SPD_1771	-	-	8	9	7	3	9	8	8	3	8	8	8	3
gi|116077487	Pde1	-	-	9	11	9	3	8	6	8	3	16	16	15	3
gi|116077488	TrxB	-	-	15	15	12	3	15	17	16	3	16	16	17	3
gi|116077489	PepC	-	-	23	26	24	3	22	27	26	3	29	30	31	3
gi|116077491	SecY	-	-	4	4	4	3	6	5	6	3	7	7	9	3
gi|116077493	RpsG	-	-	14	15	13	3	17	17	17	3	17	16	17	3
gi|116077494	YfiA	-	-	9	9	8	3	9	9	9	3	8	8	9	3
gi|116077495	SPD_0369	-	-	3	3	3	3	3	4	3	3	4	5	4	3
gi|116077497	SPD_0174	-	-	2	2	2	3	3	3	2	3	3	3	3	3
gi|116077498	SPD_1146	-	-	15	15	13	3	12	17	16	3	16	16	17	3
gi|116077499	GalT-1	-	-	3	1	2	2	3	3	3	3	4	4	4	3
gi|116077500	Cah	-	-	3	4	2	3	5	2	1	2	3	3	5	3
gi|116077501	TrpE	-	-	6	6	2	3	1	3	1	1	4	2	3	3
gi|116077503	SPD_0444	-	-	37	32	34	3	14	10	22	3	23	19	26	3
gi|116077504	LplA	-	-	13	14	14	3	9	3	9	3	9	10	11	3
gi|116077505	GroES	-	-	8	7	7	3	7	8	8	3	8	8	8	3
gi|116077508	SPD_1098	-	-	16	18	15	3	22	20	17	3	22	26	30	3
gi|116077509	SPD_0541	-	-	8	7	8	3	8	5	8	3	9	8	9	3
gi|116077510	CotS	-	-	9	8	7	3	6	7	8	3	12	10	12	3
gi|116077513	TalC	-	-	3	2	3	3	4	4	4	3	3	2	4	3
gi|116077514	RpmC	-	-	6	7	6	3	5	6	6	3	7	6	5	3
gi|116077515	DnaN	-	-	17	15	15	3	15	15	15	3	14	14	14	3
gi|116077516	RplF	-	-	14	13	14	3	13	13	13	3	13	13	13	3
gi|116077517	NrdH	-	-	4	4	4	3	1	2	1	1	2	2	3	3
gi|116077518	Ndk	-	-	7	8	7	3	9	9	9	3	9	9	8	3
gi|116077519	CelC	Off	Off	2	2	2	3	0	0	0	0	0	0	0	0
gi|116077520	PrfC	-	-	23	24	21	3	27	20	23	3	32	31	32	3
gi|116077522	GltX	-	-	31	31	33	3	35	33	32	3	39	40	41	3
gi|116077525	SPD_1551	-	-	3	3	2	3	1	3	3	2	2	2	2	3
gi|116077526	SPD_1562	-	-	2	0	2	2	2	2	1	2	5	5	3	3
gi|116077527	SPD_0739	-	-	25	25	19	3	24	24	23	3	24	25	25	3
gi|116077528	SufS	-	-	19	20	17	3	16	22	20	3	19	19	20	3
gi|116077529	SPD_0707	-	-	6	5	5	3	4	6	6	3	5	5	4	3
gi|116077531	SPD_0262	-	-	9	11	9	3	14	11	11	3	14	15	14	3
gi|116077532	SPD_1974	-	-	7	6	8	3	8	8	7	3	7	9	9	3
gi|116077535	ArgR	-	-	5	5	3	3	3	1	3	2	3	2	3	3
gi|116077536	SPD_0489	-	-	5	4	4	3	4	4	4	3	3	3	4	3
gi|116077537	PriA	-	-	15	15	14	3	21	21	16	3	17	16	16	3
gi|116077541	GdhA	-	-	31	31	29	3	29	32	32	3	31	32	33	3
gi|116077542	FolA	-	-	8	8	6	3	5	5	6	3	8	8	7	3
gi|116077543	Cad	-	-	6	6	4	3	3	3	2	3	3	2	0	2
gi|116077545	SPD_1517	-	Off	2	2	2	3	0	0	0	0	1	2	0	1
gi|116077548	PrtA	-	-	134	109	118	3	121	106	118	3	76	92	86	3
gi|116077550	SPD_1518	-	-	5	5	4	3	2	5	4	3	7	5	6	3
gi|116077551	SPD_1103	-	-	14	12	14	3	11	10	12	3	14	14	14	3
gi|116077556	SPD_1260	-	-	4	6	3	3	4	5	4	3	6	2	3	3
gi|116077560	SPD_1849	-	-	18	17	14	3	24	20	17	3	21	19	22	3
gi|116077561	MacB_5	-	-	3	2	3	3	1	2	2	2	3	4	5	3
gi|116076787	SPD_1755	On	-	0	0	0	0	0	0	0	0	4	4	2	3
gi|116077566	MetE	-	-	20	23	18	3	28	29	26	3	44	42	43	3
gi|116077567	SPD_0672	-	-	10	9	10	3	6	13	11	3	13	13	13	3
gi|116077568	PrfC	-	-	27	27	26	3	29	30	28	3	26	28	29	3
gi|116077569	SPD_1620	-	-	5	2	3	3	3	2	2	3	9	8	8	3
gi|116077571	GpsA	-	-	17	17	12	3	10	14	13	3	19	19	19	3
gi|116077572	FtsA	-	-	21	21	18	3	19	19	18	3	17	17	19	3
gi|116077573	CoaE	-	-	6	5	5	3	4	5	4	3	0	3	3	2
gi|116077574	NatB	-	-	6	7	6	3	3	5	3	3	7	7	6	3
gi|116077575	Fld	-	-	7	8	7	3	8	8	8	3	8	8	8	3
gi|116077576	PcnB	-	-	8	7	4	3	1	3	4	2	5	4	4	3
gi|116077578	SPD_2024	Off	Off	3	3	2	3	0	0	0	0	0	0	0	0
gi|116077580	PhpA	-	-	41	43	40	3	45	39	41	3	40	43	42	3
gi|116077581	GlyA	-	-	31	31	28	3	26	31	28	3	30	31	33	3
gi|116077587	DexB	-	-	19	19	20	3	20	19	21	3	23	27	26	3
gi|116077591	SPD_0974	-	-	7	7	5	3	7	9	7	3	8	9	7	3
gi|116077592	FtsK	-	-	9	10	9	3	11	10	9	3	13	13	15	3
gi|116077593	SPD_0873	-	-	8	7	8	3	9	4	6	3	9	9	9	3
gi|116077602	RplN	-	-	14	14	14	3	17	15	16	3	14	15	14	3
gi|116077604	Gki	-	-	17	16	15	3	15	17	15	3	17	17	18	3
gi|116077605	SPD_1972	-	-	4	4	2	3	0	3	3	2	2	0	4	2
gi|116077606	Sun	Off	Off	5	6	4	3	0	0	0	0	0	0	0	0
gi|116077607	SPD_1434	-	-	2	2	2	3	3	2	3	3	4	4	4	3
gi|116077610	SPD_0722	-	-	3	4	4	3	2	2	2	3	6	5	4	3
gi|116077611	Prs2	-	-	12	11	9	3	9	7	6	3	11	9	11	3
gi|116077613	PbpX	-	-	19	19	20	3	23	20	20	3	28	29	25	3
gi|116077617	DivIB	-	-	2	5	4	3	6	5	4	3	6	4	6	3
gi|116077618	StrH	-	-	47	42	51	3	41	28	36	3	35	43	37	3
gi|116077619	SPD_1082	-	-	5	4	5	3	3	3	2	3	3	3	3	3
gi|116076799	SPD_1192	Off	-	5	4	4	3	4	3	5	3	0	0	0	0
gi|116077621	Fhs	-	-	22	24	22	3	21	21	20	3	24	19	23	3
gi|116077623	SPD_0683	Off	-	3	2	2	3	1	2	0	1	0	0	0	0
gi|116077624	FabD	-	-	14	16	13	3	12	15	12	3	11	12	17	3
gi|116077630	SPD_1265	-	-	2	1	2	2	0	0	0	0	0	0	0	0
gi|116077633	PyrDb	-	-	4	4	3	3	0	5	4	2	8	7	6	3
gi|116077635	SPD_0886	-	-	8	8	8	3	6	7	6	3	6	6	4	3
gi|116077638	YidC	-	-	7	7	6	3	6	4	4	3	9	9	9	3
gi|116077639	TsaD	-	-	8	9	6	3	0	7	7	2	11	9	9	3
gi|116077640	SPD_0572	-	-	2	2	2	3	2	4	3	3	2	3	3	3
gi|116077641	AroD	-	-	11	9	9	3	10	10	10	3	11	9	10	3
gi|116077645	GrpE	-	-	12	12	11	3	12	12	12	3	13	14	13	3
gi|116077646	AroK	-	-	5	4	3	3	4	5	3	3	4	5	5	3
gi|116077648	Rnc	-	-	6	6	5	3	5	6	5	3	8	9	5	3
gi|116077649	SPD_1391	-	-	8	7	6	3	7	6	6	3	8	6	6	3
gi|116077650	SulD	-	-	6	6	6	3	4	6	5	3	4	4	5	3
gi|116077651	SPD_1520	-	-	8	7	7	3	10	5	7	3	9	10	10	3
gi|116077652	HflX	-	-	13	12	12	3	3	5	4	3	7	6	4	3
gi|116077653	CelB	-	-	2	2	2	3	3	2	2	3	5	5	6	3
gi|116077654	SPD_0637	-	-	1	1	2	1	1	2	2	2	3	3	3	3
gi|116076806	AcyP	On	-	0	0	0	0	0	0	0	0	4	4	4	3
gi|116077658	CbiO1	-	-	4	4	4	3	3	2	3	3	4	5	5	3
gi|116077659	PrsA	-	-	29	29	24	3	31	30	28	3	30	31	29	3
gi|116077660	SPD_1714	-	-	5	5	5	3	4	6	5	3	7	7	7	3
gi|116077661	PstS2	-	-	11	11	9	3	7	8	7	3	10	9	12	3
gi|116077663	AmiC	-	-	16	17	17	3	15	19	17	3	20	18	20	3
gi|116077665	PatB	-	-	6	5	2	3	11	8	5	3	9	10	12	3
gi|116077666	LysS	-	-	37	37	38	3	34	33	33	3	40	36	37	3
gi|116077667	SPD_1927	-	-	9	11	10	3	7	5	4	3	9	10	5	3
gi|116077669	RebM	-	-	5	5	5	3	4	4	3	3	5	7	4	3
gi|116077671	RpsU	-	-	5	5	5	3	5	6	6	3	4	6	5	3
gi|116077672	CpsY	-	-	5	6	4	3	1	4	4	2	6	6	6	3
gi|116077673	Adh2	-	-	14	14	8	3	17	17	14	3	18	17	18	3
gi|116077674	SPD_0150	-	-	18	19	18	3	17	18	19	3	17	16	18	3
gi|116077675	SPD_0752	-	-	5	5	5	3	5	5	5	3	5	5	5	3
gi|116077677	ThrB	-	-	9	9	6	3	6	7	7	3	9	9	6	3
gi|116077678	PepO	-	-	46	47	47	3	54	55	49	3	51	52	52	3
gi|116077679	IspD	-	-	4	5	6	3	7	4	4	3	10	12	8	3
gi|116077680	PheT	-	-	24	25	20	3	24	24	24	3	24	22	26	3
gi|116077681	RpsI	-	-	8	8	7	3	10	9	9	3	9	9	9	3
gi|116077682	SPD_1380	-	-	22	20	20	3	13	14	15	3	22	22	22	3
gi|116077683	RibF	-	-	15	16	12	3	4	11	9	3	10	9	10	3
gi|116077684	SPD_1303	-	-	6	6	5	3	4	4	3	3	3	5	5	3
gi|116077685	CcpA	-	-	18	16	14	3	16	14	14	3	16	15	15	3
gi|116076828	SPD_0567	-	-	1	1	2	1	0	0	0	0	2	3	2	3
gi|116077690	SPD_1302	Off	Off	2	2	3	3	0	0	0	0	0	0	0	0
gi|116077691	CatE	-	-	4	4	4	3	2	3	3	3	4	4	2	3
gi|116077693	InfA	-	-	2	2	2	3	3	2	3	3	3	2	3	3
gi|116077694	MvaK2	-	-	3	3	2	3	0	2	2	2	3	2	4	3
gi|116077697	SPD_1177	-	-	3	2	1	2	2	2	2	3	4	4	3	3
gi|116077698	SPD_0954	-	-	14	13	11	3	13	12	11	3	10	14	11	3
gi|116077700	SPD_0926	-	-	10	12	10	3	3	12	10	3	10	8	11	3
gi|116077701	UvrA	-	-	19	16	20	3	16	17	18	3	27	23	28	3
gi|116077702	SPD_1595	-	-	6	8	6	3	5	9	9	3	9	8	7	3
gi|116077703	ClpX	-	-	17	17	14	3	8	16	17	3	19	19	17	3
gi|116077704	RpsB	-	-	18	19	18	3	18	19	18	3	19	20	19	3
gi|116077705	LacB	-	-	6	6	5	3	7	5	6	3	6	6	8	3
gi|116077706	SPD_0431	-	-	5	5	5	3	5	6	5	3	11	11	12	3
gi|116077707	TcyJ	-	-	11	12	12	3	8	6	7	3	2	2	2	3
gi|116077708	PurD	-	-	20	17	10	3	2	9	12	3	8	6	7	3
gi|116077709	SPD_0091	-	-	23	22	17	3	26	24	22	3	23	20	24	3
gi|116077710	SPD_1996	-	-	1	2	1	1	2	2	1	2	2	3	4	3
gi|116077713	GlgB	-	-	7	9	7	3	5	3	5	3	8	5	7	3
gi|116077714	RibH	-	-	6	5	5	3	7	6	5	3	8	8	9	3
gi|116077715	SPD_0969	-	-	7	6	7	3	2	9	7	3	9	10	9	3
gi|116077716	LiaR	-	-	6	6	5	3	7	4	6	3	6	5	5	3
gi|116077717	NanA	-	-	26	26	29	3	27	27	27	3	17	15	17	3
gi|116077718	SPD_1837	-	-	7	7	6	3	10	10	9	3	8	9	9	3
gi|116077719	RecJ	-	-	7	7	6	3	10	11	6	3	12	10	11	3
gi|116077725	LctO	-	-	18	20	16	3	18	19	16	3	21	20	22	3
gi|116077726	RpsO	-	-	6	6	6	3	9	7	7	3	7	9	10	3
gi|116077727	PsaD	-	-	14	14	13	3	14	15	14	3	13	13	14	3
gi|116077729	PrfA	-	-	28	28	24	3	22	24	24	3	25	24	27	3
gi|116077730	Exp5	-	-	7	5	7	3	8	6	3	3	12	12	11	3
gi|116077731	IlvC	-	-	29	29	28	3	30	31	31	3	28	28	28	3
gi|116077732	PenA	-	-	17	18	20	3	26	21	24	3	21	20	18	3
gi|116077733	DeoC	-	-	10	11	10	3	12	10	11	3	12	11	12	3
gi|116077734	MalD	-	-	1	3	2	2	1	2	1	1	2	2	2	3
gi|116077735	GlnR	-	-	8	6	6	3	2	4	5	3	5	3	2	3
gi|116077737	SPD_0492	-	-	1	1	2	1	0	0	0	0	0	0	0	0
gi|116077738	NrdF	-	-	15	16	15	3	6	13	11	3	13	12	14	3
gi|116077739	SPD_1564	-	-	1	1	1	0	0	0	0	0	0	0	0	0
gi|116077740	SPD_0240	-	-	2	2	2	3	2	2	2	3	3	2	3	3
gi|116077743	AroG	-	-	15	16	15	3	15	17	15	3	15	15	16	3
gi|116077744	SPD_0915	-	-	21	22	17	3	24	24	25	3	26	27	26	3
gi|116077747	SPD_1384	-	-	2	2	2	3	2	2	1	2	2	5	4	3
gi|116077748	MalX	-	-	24	23	25	3	18	24	24	3	24	24	24	3
gi|116077751	GalM	Off	Off	4	3	3	3	0	0	0	0	0	0	0	0
gi|116077752	SPD_0996	-	-	7	6	5	3	6	4	5	3	7	6	5	3
gi|116077753	SPD_0635	-	-	5	4	6	3	5	4	6	3	6	7	6	3
gi|116077754	SPD_1725	-	-	11	11	10	3	9	10	11	3	11	11	11	3
gi|116077756	HemK	-	-	3	5	2	3	0	2	2	2	2	0	3	2
gi|116077757	SPD_1902	-	-	7	9	9	3	9	8	9	3	7	8	9	3
gi|116076850	SPD_0887	On	-	0	0	0	0	0	0	0	0	2	2	2	3
gi|116077760	GatC	-	-	1	3	1	1	0	0	0	0	0	0	0	0
gi|116076892	SPD_1514	-	Off	6	4	6	3	0	0	0	0	5	5	5	3
gi|116077764	PflB	-	-	37	35	36	3	43	42	36	3	39	39	41	3
gi|116077765	CysS	-	-	22	23	19	3	9	18	20	3	22	20	19	3
gi|116077767	SPD_1137	-	-	2	2	3	3	7	5	4	3	14	12	13	3
gi|116077770	SPD_1835	-	-	1	0	1	0	0	0	0	0	0	0	0	0
gi|116077772	RplV	-	-	14	13	12	3	17	16	17	3	14	14	15	3
gi|116077773	SPD_1375	-	-	12	11	11	3	10	11	9	3	10	10	9	3
gi|116077775	CapD	-	-	18	16	19	3	20	20	19	3	19	18	18	3
gi|116077776	ArcC	-	-	9	9	6	3	1	9	8	2	12	8	12	3
gi|116077777	SPD_1962	-	-	14	14	12	3	5	14	12	3	16	16	15	3
gi|116077778	SPD_0231	-	-	7	5	5	3	3	4	4	3	6	6	4	3
gi|116077780	SPD_1745	-	-	10	5	7	3	1	4	2	2	7	4	8	3
gi|116077781	LeuS	-	-	32	33	29	3	34	37	33	3	39	37	34	3
gi|116077784	SufC	-	-	21	21	20	3	24	24	23	3	23	22	23	3
gi|116077785	AtpA	-	-	23	25	24	3	28	27	28	3	26	27	27	3
gi|116077789	BgaC	-	-	2	1	3	2	2	1	0	1	0	1	1	0
gi|116077792	RlmL	-	-	16	16	9	3	19	18	18	3	20	18	21	3
gi|116077793	SPD_0829	Off	Off	6	6	3	3	0	0	0	0	0	0	0	0
gi|116077796	MutS2	-	-	17	21	14	3	18	17	17	3	23	22	23	3
gi|116076933	IlvB	Off	-	10	13	10	3	4	4	4	3	0	0	0	0
gi|158705929	FolD	-	-	8	9	7	3	2	9	6	3	10	8	10	3
gi|172046079	Apt	-	-	12	12	10	3	13	14	13	3	13	12	14	3
gi|187611312	Pnp	-	-	37	39	38	3	40	42	33	3	35	37	30	3
gi|215274946	SPD_1657	-	-	7	7	6	3	6	6	6	3	9	6	5	3
gi|251764802	RexB	-	-	15	15	16	3	19	23	21	3	25	27	28	3
gi|116076947	SPD_0107	On	-	0	0	0	0	0	0	0	0	8	7	8	3
gi|5030426	FtsH	-	-	31	35	33	3	36	34	33	3	32	32	33	3
gi|8163644	PsPC	-	-	6	6	3	3	12	14	6	3	7	11	6	3
Biognosys|iRT-Kit	protein group	On	On	0	0	0	0	11	11	11	3	9	9	10	3
gi|116076126	RecU	On	On	0	0	0	0	5	3	6	3	8	3	7	3
gi|116076153	Pfl	On	-	0	0	0	0	1	2	2	2	3	4	3	3
gi|116076166	LacE-2	On	-	0	0	0	0	3	3	0	2	5	6	6	3
gi|116076168	SPD_0186	On	On	0	0	0	0	3	3	2	3	7	7	6	3
gi|116076263	SPD_1566	On	On	0	0	0	0	2	2	2	3	3	2	2	3
gi|116076298	SPD_0481	On	On	0	0	0	0	2	3	2	3	5	4	5	3
gi|116076337	XerD	-	-	0	0	0	0	2	0	3	2	0	2	1	1
gi|116076463	NanE-1	-	-	0	0	0	0	1	0	2	1	0	0	0	0
gi|116076959	SPD_1426	On	-	0	0	0	0	0	0	0	0	2	2	2	3
gi|116076524	MraY	-	-	0	0	0	0	1	2	2	2	2	1	2	2
gi|116076622	SPD_1465	On	-	0	0	0	0	1	1	3	1	6	6	6	3
gi|116076639	RpmF	-	-	0	0	0	0	2	1	1	1	0	0	0	0
gi|116076679	YpmB	-	-	0	0	0	0	2	1	2	2	2	1	2	2
gi|116077070	FolC	-	Off	2	2	2	3	0	0	0	0	3	3	3	3
gi|116076742	MscL	-	-	0	0	0	0	2	1	2	2	1	2	2	2
gi|116076823	SPD_1715	-	-	0	0	0	0	1	1	2	1	0	0	0	0
gi|116076876	SPD_1587	On	-	0	0	0	0	2	0	0	1	3	2	4	3
gi|116076903	SPD_0634	On	-	0	0	0	0	2	0	1	1	2	3	3	3
gi|116076996	Tdk	On	-	0	0	0	0	2	1	2	2	5	5	4	3
gi|116077033	ProC	On	-	0	0	0	0	1	2	2	2	3	2	2	3
gi|116077122	CelD	On	-	0	0	0	0	2	2	1	2	2	2	3	3
gi|116077127	SPD_1482	On	-	0	0	0	0	2	1	2	2	4	4	2	3
gi|116077202	SPD_0579	-	-	0	0	0	0	0	1	3	1	1	4	4	2
gi|116077256	Cls	-	-	0	0	0	0	1	4	3	2	0	0	0	0
gi|116077300	SPD_1258	-	-	0	0	0	0	2	2	1	2	0	0	0	0
gi|116077309	SPD_1347	-	-	0	0	0	0	1	2	0	1	1	1	2	1
gi|116077366	PstS1	On	-	0	0	0	0	2	1	2	2	2	3	4	3
gi|116077403	SPD_1252	On	-	0	0	0	0	0	2	2	2	2	2	2	3
gi|116077076	GlpQ	On	-	0	0	0	0	0	0	0	0	3	2	4	3
gi|116077431	BrnQ	On	-	0	0	0	0	2	2	1	2	2	3	3	3
gi|116077475	Mvk	On	On	0	0	0	0	2	3	2	3	4	4	3	3
gi|116077530	SPD_0450	-	-	0	0	0	0	2	2	1	2	0	0	0	0
gi|116077590	SPD_1332	On	-	0	0	0	0	2	1	1	1	3	4	4	3
gi|116077628	SPD_1553	-	-	0	0	0	0	1	1	1	0	1	3	2	2
gi|116077112	ThiE-1	Off	-	4	4	5	3	2	4	3	3	0	0	0	0
gi|116077724	SPD_1021	-	-	0	0	0	0	2	1	1	1	3	0	2	2
gi|116077741	GalT-2	-	-	0	0	0	0	4	2	0	2	1	2	1	1
gi|116075939	AtpE	-	-	0	0	0	0	0	0	0	0	1	1	3	1
gi|116075965	MalC	-	-	0	0	0	0	0	0	0	0	2	1	1	1
gi|116076006	SPD_0596	-	-	0	0	0	0	0	0	0	0	1	1	2	1
gi|116076050	SPD_1488	-	-	0	0	0	0	0	0	0	0	2	1	2	2
gi|116077125	SPD_1191	Off	-	4	4	4	3	3	6	4	3	0	0	0	0
gi|116076150	SPD_0488	-	-	0	0	0	0	0	0	0	0	3	1	2	2
gi|116077236	YesN	-	Off	2	2	2	3	0	0	0	0	4	2	2	3
gi|116076205	Vex3	-	-	0	0	0	0	0	0	0	0	0	2	1	1
gi|116076209	Dtd	-	-	0	0	0	0	0	0	0	0	1	1	1	0
gi|116076221	CelB	-	-	0	0	0	0	0	0	0	0	1	2	2	2
gi|116076349	RibD	-	-	0	0	0	0	0	0	0	0	4	1	0	1
gi|116076379	SPD_1459	-	-	0	0	0	0	0	0	0	0	2	1	2	2
gi|116076403	LiaS	-	-	0	0	0	0	0	0	0	0	1	2	2	2
gi|116076526	PnpS	-	-	0	0	0	0	0	0	0	0	2	0	2	2
gi|116077299	SPD_0155	-	-	1	2	2	2	0	0	0	0	2	2	2	3
gi|116076552	PyrK	-	-	0	0	0	0	0	0	0	0	3	4	1	2
gi|116077300;gi|116076026	protein group	-	Off	5	5	4	3	0	0	0	0	7	6	6	3
gi|116077308	SPD_0104	On	-	0	0	0	0	0	0	0	0	2	2	2	3
gi|116077364	SPD_0697	On	-	0	0	0	0	0	0	0	0	5	3	5	3
gi|116077373	RibE	On	-	0	0	0	0	0	0	0	0	6	5	6	3
gi|116077397	PstA2	On	-	0	0	0	0	0	0	0	0	2	2	2	3
gi|116077412	SPD_0569	On	-	0	0	0	0	1	1	1	0	6	5	4	3
gi|116077437	CutC	On	-	0	0	0	0	0	0	0	0	7	5	6	3
gi|116076817	SPD_1128	-	-	0	0	0	0	0	0	0	0	2	1	0	1
gi|116076821	SPD_0805	-	-	0	0	0	0	0	0	0	0	1	1	1	0
gi|116076838	EcfT_4	-	-	0	0	0	0	0	0	0	0	3	2	1	2
gi|116076839	SPD_1541	-	-	0	0	0	0	0	0	0	0	4	3	1	2
gi|116076840	SPD_0555	-	-	0	0	0	0	0	0	0	0	1	1	2	1
gi|116077440	SecE	On	-	0	0	0	0	0	0	0	0	2	3	2	3
gi|116076852	PotD	-	-	0	0	0	0	0	0	0	0	2	0	0	1
gi|116076937	SPD_0095	-	-	0	0	0	0	0	0	0	0	2	1	2	2
gi|116076946	YlmE	-	-	0	0	0	0	0	0	0	0	5	2	1	2
gi|116077441	SPD_1769	On	-	0	0	0	0	0	0	0	0	2	3	3	3
gi|116077564	SPD_0191	-	Off	5	2	3	3	0	0	0	0	4	3	2	3
gi|116076995	RafE	-	-	0	0	0	0	0	0	0	0	1	3	2	2
gi|116077002	YqgQ	-	-	0	0	0	0	0	0	0	0	2	1	0	1
gi|116077582	SPD_0423	On	-	0	0	0	0	0	0	0	0	2	3	4	3
gi|116077152	SPD_0465	-	-	0	0	0	0	0	0	0	0	3	3	0	2
gi|116077194	SPD_2018	-	-	0	0	0	0	0	0	0	0	4	3	1	2
gi|116077620	MtrR	On	-	1	1	1	0	0	0	0	0	2	2	2	3
gi|116077332	EcfT_1	-	-	0	0	0	0	0	0	0	0	2	1	1	1
gi|116077358	SPD_0999	-	-	0	0	0	0	0	0	0	0	0	2	2	2
gi|116077636	SPD_0781	-	On	0	0	0	0	2	2	2	3	0	0	0	0
gi|116077637	SPD_0148	On	-	0	0	0	0	0	0	0	0	2	2	2	3
gi|116077389	SPD_2058	-	-	0	0	0	0	0	0	0	0	1	1	2	1
gi|116077656	TreP	Off	-	3	3	3	3	5	3	3	3	0	0	0	0
gi|116077670	SPD_1575	On	-	0	0	0	0	0	0	0	0	3	2	3	3
gi|116077439	SPD_1920	-	-	0	0	0	0	0	0	0	0	2	1	1	1
gi|116077689	TenA	Off	-	5	5	4	3	5	4	3	3	0	0	0	0
gi|116077692	ScrA	On	-	0	0	0	0	0	0	0	0	2	7	4	3
gi|116077502	SPD_1447	-	-	0	0	0	0	0	0	0	0	3	1	1	1
gi|116077758	StkP	-	Off	24	27	25	3	0	0	0	0	11	10	10	3
gi|116077595	SPD_1253	-	-	0	0	0	0	0	0	0	0	1	1	1	0
gi|116077763	SPD_0439	-	-	2	1	2	2	2	3	3	3	0	0	0	0
gi|116077642	SPD_1029	-	-	0	0	0	0	0	0	0	0	1	3	2	2
gi|116077798	SPD_0189	-	Off	3	4	3	3	1	0	1	0	3	2	2	3
gi|116077686	SPD_1358	-	-	0	0	0	0	0	0	0	0	1	2	2	2
gi|2911484	Rep	-	Off	8	7	2	3	0	0	0	0	10	8	10	3
gi|116077769	SPD_1010	-	-	0	0	0	0	0	0	0	0	2	1	1	1
gi|116077795	SPD_0952	-	-	0	0	0	0	0	0	0	0	1	2	1	1
