# Supplementary material for: Proteomic Investigation Uncovers Potential Targets and Target Sites of Pneumococcal Serine-Threonine Kinase StkP and Phosphatase PhpP
Source: Front Microbiol. 2020 Feb 4;10:3101. doi: 10.3389/fmicb.2019.03101 (PMC7011611; doi:10.3389/fmicb.2019.03101)
Supplement: Supplementary file 6 [file Data_Sheet_6.xlsx]

## Sheet: Data Sheet S6_Information
Data Sheet S6: Streptococcus pneumoniae D39 annotation
Supplementary File S1: S. Pneumoniae D39_Annotation
	Annotation of Streptococcus pneumoniae D39
	Protein annotation based on a protein table downloaded from UniProt (The UniProt Consortium, 2017) with 1,918 predicted proteins of the S. pneumoniae strain D39.
	The predicted proteins of S. pneumoniae D39 were classified into functional protein groups according to TIGRFAM (Haft et al., 2001) or KEGG-based (Kanehisa and Goto, 2000) annotation.
	Proteins with unknown function were searched in literature and additional databases, namely UniProt (The UniProt Consortium, 2017) and Ensembl (Zerbino et al., 2018).
	NCBI identifier
	Locus name
	Uniprot identifier
	Protein description
	Gene name
	Operon
	Protein name
	Main role
	Sub role
	PSORTb localization prediction
	Protein length

## Sheet: S1_S. Pneumoniae D39_Annotation
NCBI identifier	Locus name	Uniprot identifier	Protein description	Gene name	Operon	Protein name	Main role	Sub role	PSORTb localization prediction	Protein length
gi|116076629	SPD_0001	Q04N63	Chromosomal replication initiator protein DnaA	dnaA	1	DnaA	DNA metabolism	DNA replication, recombination and repair	Cytoplasmic	453
gi|116077515	SPD_0002	A0A0H2ZR23	DNA polymerase III subunit beta	dnaN	1	DnaN	DNA metabolism	DNA replication, recombination and repair	Cytoplasmic	378
gi|116076426	SPD_0003	A0A0H2ZNI8	Uncharacterized protein	SPD_0003	2	SPD_0003	Unknown function	Unknown function	Unknown	64
gi|116076914	SPD_0004	A0A0H2ZP25	Ribosome-binding ATPase YchF	ychF	2	YchF	Unknown function	General	Cytoplasmic	371
gi|116076307	SPD_0005	Q04N59	Peptidyl-tRNA hydrolase	pth	2	Pth	Protein synthesis	Protein synthesis - Other	Cytoplasmic	189
gi|116076727	SPD_0006	A0A0H2ZNN6	Transcription-repair-coupling factor	mfd	2	Mfd	DNA metabolism	DNA replication, recombination and repair	Cytoplasmic	1169
gi|116076118	SPD_0007	A0A0H2ZLU2	S4 domain protein	SPD_0007	2	SPD_0007	Transcription	Transcription - Other	Unknown	88
gi|116076555	SPD_0008	A0A0H2ZNW1	Septum formation initiator, putative	ftsB	2	FtsB	Cellular processes	Cell division	Unknown	122
gi|116077416	SPD_0009	A0A0H2ZQX2	Uncharacterized protein	SPD_0009	2	SPD_0009	Unknown function	Unknown function	Extracellular	40
gi|116076529	SPD_0010	A0A0H2ZN49	Uncharacterized protein	ampC	2	AmpC	Cellular processes	Toxin production and resistance	Unknown	422
gi|116077357	SPD_0011	Q04N53	tRNA(Ile)-lysidine synthase	tilS	2	TilS	Protein synthesis	tRNA and rRNA base modification	Cytoplasmic	425
gi|116077257	SPD_0012	A0A0H2ZP27	Hypoxanthine phosphoribosyltransferase	hpt	2	Hpt	Nucleotide metabolism	Purine metabolism	Cytoplasmic	180
gi|5030426	SPD_0013	A0A0H2ZMA2	ATP-dependent zinc metalloprotease FtsH	ftsH	2	FtsH	Protein fate	Degradation of proteins, peptides and glycopeptides	Membrane	652
gi|116075912	SPD_0014	A0A0H2ZLC3	Transcriptional regulator ComX1	comx1	3	Comx1	Signal transduction	Two-component system	Cytoplasmic	159
gi|116076532	SPD_0023	A0A0H2ZMA7	Uncharacterized protein	SPD_0023	11	SPD_0023	Unknown function	Unknown function	Cytoplasmic	78
gi|116076348	SPD_0024	Q04N48	Adenylosuccinate synthetase	purA	12	PurA	Nucleotide metabolism	Purine metabolism	Cytoplasmic	428
gi|116077196	SPD_0025	A0A0H2ZPW3	tRNA-specific adenosine deaminase	tadA	13	TadA	Protein synthesis	tRNA and rRNA base modification	Cytoplasmic	155
gi|116076506	SPD_0027	A0A0H2ZNQ0	Deoxyuridine 5'-triphosphate nucleotidohydrolase	dut	15	Dut	Nucleotide metabolism	Pyrimidine metabolism	Unknown	147
gi|116077435	SPD_0028	A0A0H2ZPI4	Phosphoglycerate mutase family protein	SPD_0028	15	SPD_0028	Unknown function	Unknown function	Cytoplasmic	185
gi|116076819	SPD_0029	A0A0H2ZP87	DNA repair protein radA	radA	15	RadA	DNA metabolism	DNA replication, recombination and repair	Cytoplasmic	420
gi|116076038	SPD_0030	A0A0H2ZMP3	Uncharacterized protein	cynT	16	CynT	Energy metabolism	Nitrogen metabolism	Cytoplasmic	165
gi|116076871	SPD_0031	A0A0H2ZN38	Membrane protein, putative	SPD_0031	16	SPD_0031	Unknown function	Unknown function	Membrane	219
gi|116076365	SPD_0032	A0A0H2ZMP0	Uncharacterized protein	SPD_0032	16	SPD_0032	Unknown function	Unknown function	Unknown	43
gi|116077185	SPD_0033	A0A0H2ZP84	Ribose-phosphate pyrophosphokinase	prsA	17	SPD_0033	Nucleotide metabolism	Purine metabolism	Cytoplasmic	322
gi|116077394	SPD_0035	A0A0H2ZQQ7	Uncharacterized protein	SPD_0035	19	SPD_0035	Unknown function	Unknown function	Membrane	77
gi|116076763	SPD_0036	A0A0H2ZP41	Uncharacterized protein	SPD_0036	19	SPD_0036	Unknown function	Unknown function	Unknown	38
gi|116077577	SPD_0037	A0A0H2ZPU0	Uncharacterized protein	SPD_0037	20	SPD_0037	Unknown function	Unknown function	Cytoplasmic	117
gi|116077230	SPD_0038	A0A0H2ZQE1	DNA polymerase	polA	21	PolA	DNA metabolism	DNA replication, recombination and repair	Cytoplasmic	877
gi|116075891	SPD_0039	A0A0H2ZM19	Uncharacterized protein	SPD_0039	22	SPD_0039	Unknown function	Unknown function	Cytoplasmic	145
gi|116077067	SPD_0040	A0A0H2ZNK5	Membrane protein, putative	SPD_0040	23	SPD_0040	Unknown function	Unknown function	Membrane	336
gi|116076715	SPD_0041	A0A0H2ZP06	Aromatic amino acid aminotransferase	araT	24	ArAT	Amino acid metabolism	Lysine biosynthesis	Cytoplasmic	389
gi|116077766	SPD_0042	Q04N32	DNA repair protein RecO	recO	24	RecO	DNA metabolism	DNA replication, recombination and repair	Cytoplasmic	256
gi|116076491	SPD_0043	Q04N31	Phosphate acyltransferase	plsX	24	PlsX	Lipid metabolism	Glycerolipid metabolism	Cytoplasmic	330
gi|116076181	SPD_0044	A0A0H2ZLY7	Acyl carrier protein	acpP	24	AcpP	Lipid metabolism	Fatty acid biosynthesis	Cytoplasmic	77
gi|116077473	SPD_0046	A0A0H2ZPL2	Bacteriocin BlpU	blpU	26	BlpU	Unknown function	Unknown function	Unknown	76
gi|116076380	SPD_0047	A0A0H2ZLZ6	Uncharacterized protein	blpO_1	26	BlpO_1	Unknown function	Unknown function	Membrane	41
gi|116077086	SPD_0049	A0A0H2ZPI8	Competence factor transporting ATP-binding/permease protein ComA	comA	28	ComA	Signal transduction	Two-component system	Membrane	717
gi|116076277	SPD_0050	A0A0H2ZN80	Competence factor transport protein ComB	comB	28	ComB	Signal transduction	Two-component system	Membrane	449
gi|116076766	SPD_0051	Q04N25	Phosphoribosylaminoimidazole-succinocarboxamide synthase	purC	29	PurC	Nucleotide metabolism	Purine metabolism	Cytoplasmic	235
gi|116077079	SPD_0052	A0A0H2ZNL6	Phosphoribosylformylglycinamidine synthase, putative	purL	29	PurL	Nucleotide metabolism	Purine metabolism	Cytoplasmic	1241
gi|116076520	SPD_0053	A0A0H2ZM99	Amidophosphoribosyltransferase	purF	29	PurF	Nucleotide metabolism	Purine metabolism	Cytoplasmic	480
gi|116076311	SPD_0054	Q04N22	Phosphoribosylformylglycinamidine cyclo-ligase	purM	29	PurM	Nucleotide metabolism	Purine metabolism	Cytoplasmic	340
gi|116076378	SPD_0055	A0A0H2ZNE9	Phosphoribosylglycinamide formyltransferase	purN	29	PurN	Nucleotide metabolism	Purine metabolism	Cytoplasmic	181
gi|116077466	SPD_0056	A0A0H2ZQX1	VanZ protein, putative	SPD_0056	30	SPD_0056	Unknown function	Unknown function	Membrane	169
gi|116076638	SPD_0057	Q04N19	Bifunctional purine biosynthesis protein PurH	purH	30	PurH	Nucleotide metabolism	Purine metabolism	Cytoplasmic	515
gi|116077708	SPD_0058	A0A0H2ZRR1	Phosphoribosylamine--glycine ligase	purD	30	PurD	Nucleotide metabolism	Purine metabolism	Cytoplasmic	420
gi|116076352	SPD_0059	A0A0H2ZMM8	N5-carboxyaminoimidazole ribonucleotide mutase	purE	30	PurE	Nucleotide metabolism	Purine metabolism	Membrane	162
gi|116076968	SPD_0060	A0A0H2ZNN1	N5-carboxyaminoimidazole ribonucleotide synthase	purK	30	PurK	Nucleotide metabolism	Purine metabolism	Membrane	363
gi|116077524	SPD_0061	A0A0H2ZPP9	Uncharacterized protein	SPD_0061	30	SPD_0061	Unknown function	Unknown function	Cytoplasmic	75
gi|116077199	SPD_0062	A0A0H2ZQC4	Adenylosuccinate lyase	purB	30	PurB	Nucleotide metabolism	Purine metabolism	Cytoplasmic	432
gi|116077618	SPD_0063	A0A0H2ZQY4	Beta-N-acetylhexosaminidase	strH	31	StrH	Glycan biosynthesis and metabolism	Glycan degradation	Cellwall	1312
gi|116076527	SPD_0064	A0A0H2ZMA3	Transcriptional regulator, GntR family protein	SPD_0064	31	SPD_0064	Transcription	Transcription factor	Cytoplasmic	247
gi|116077789	SPD_0065	A0A0H2ZQE5	Beta-galactosidase 3	bgaC	32	BgaC	Carbohydrate metabolism	Galactose metabolism	Cytoplasmic	595
gi|116076725	SPD_0066	A0A0H2ZMS0	PTS system, IIB component	SPD_0066	32	SPD_0066	Transport and binding proteins	Carbohydrates, organic alcohols and acids	Cytoplasmic	158
gi|116076182	SPD_0067	A0A0H2ZLL4	PTS system, IIC component	SPD_0067	32	SPD_0067	Transport and binding proteins	Carbohydrates, organic alcohols and acids	Membrane	301
gi|116075901	SPD_0068	A0A0H2ZKY1	PTS system, IID component	SPD_0068	32	SPD_0068	Transport and binding proteins	Carbohydrates, organic alcohols and acids	Membrane	271
gi|116076971	SPD_0069	A0A0H2ZP76	PTS system, IIA component	SPD_0069	32	SPD_0069	Transport and binding proteins	Carbohydrates, organic alcohols and acids	Cytoplasmic	134
gi|116076088	SPD_0070	A0A0H2ZMS8	Sugar isomerase domain protein AgaS	agaS	32	AgaS	Carbohydrate metabolism	Carbohydrate metabolism - Other	Cytoplasmic	388
gi|116077751	SPD_0071	A0A0H2ZRU4	Aldose 1-epimerase	galM	33	GalM	Carbohydrate metabolism	Glycolysis /Gluconeogenesis	Cytoplasmic	345
gi|116077691	SPD_0072	A0A0H2ZQ49	Glyoxalase family protein	catE	34	CatE	Xenobiotics biodegradation and metabolism	Benzoate degradation	Cytoplasmic	284
gi|116076411	SPD_0073	A0A0H2ZNA4	Uncharacterized protein	SPD_0073	35	SPD_0073	Unknown function	Unknown function	Cytoplasmic	85
gi|116077140	SPD_0074	A0A0H2ZP23	Phosphorylase, Pnp/Udp family protein, putative	SPD_0074	36	SPD_0074	Nucleotide metabolism	Unknown substrate	Cytoplasmic	254
gi|116076826	SPD_0075	A0A0H2ZNV1	Uncharacterized protein	SPD_0075	37	SPD_0075	Unknown function	Unknown function	Unknown	61
gi|116077376	SPD_0076	A0A0H2ZPD0	Potassium uptake protein, Trk family protein	trkH_1	38	TrkH_1	Transport and binding proteins	Cations and iron carrying compounds	Membrane	459
gi|116076424	SPD_0077	A0A0H2ZNB5	Potassium uptake protein, Trk family protein	trkA_1	38	TrkA_1	Transport and binding proteins	Cations and iron carrying compounds	Cytoplasmic	221
gi|116077722	SPD_0078	A0A0H2ZQ90	Glycosyl transferase, group 2 family protein	SPD_0078	39	SPD_0078	Carbohydrate metabolism	Fructose and mannose metabolism	Membrane	179
gi|116076673	SPD_0079	A0A0H2ZP46	Uncharacterized protein	SPD_0079	40	SPD_0079	Unknown function	Unknown function	Cytoplasmic	136
gi|116076012	SPD_0080	A0A0H2ZM01	Cell wall surface anchor family protein	SPD_0080	41	SPD_0080	Glycan biosynthesis and metabolism	Glycan biosynthesis and metabolism - Other	Cellwall	1161
gi|116077295	SPD_0081	A0A0H2ZQF8	DNA-binding response regulator	saeR	42	SaeR	Signal transduction	Two-component system	Cytoplasmic	232
gi|116075994	SPD_0082	A0A0H2ZME3	Sensor histidine kinase	saeS	42	SaeS	Signal transduction	Two-component system	Membrane	350
gi|116077157	SPD_0083	Q04MZ3	30S ribosomal protein S4	rpsD	43	RpsD	Protein synthesis	Ribosomal proteins	Cytoplasmic	203
gi|116076322	SPD_0084	A0A0H2ZNA8	IS630-Spn1, transposase Orf1	SPD_0084	44	SPD_0084	Unknown function	Unknown function	Extracellular	52
gi|116076940	SPD_0085	A0A0H2ZPP2	Uncharacterized protein	SPD_0085	45	SPD_0085	Unknown function	Unknown function	Cytoplasmic	46
gi|116077060	SPD_0086	A0A0H2ZNK0	Uncharacterized protein	SPD_0086	46	SPD_0086	Unknown function	Unknown function	Unknown	86
gi|116077040	SPD_0087	A0A0H2ZNI5	Uncharacterized protein	SPD_0087	46	SPD_0087	Unknown function	Unknown function	Cytoplasmic	73
gi|116075991	SPD_0088	A0A0H2ZMK4	ABC transporter, permease protein	lplB	47	LplB	Transport and binding proteins	Other transport and binding proteins	Membrane	309
gi|116077318	SPD_0089	A0A0H2ZQN0	ABC transporter, permease protein	lplC	47	LplC	Transport and binding proteins	Other transport and binding proteins	Membrane	307
gi|116077504	SPD_0090	A0A0H2ZQK8	ABC transporter, substrate-binding protein	lplA	47	LplA	Transport and binding proteins	Other transport and binding proteins	Unknown	491
gi|116077709	SPD_0091	Q04MY5	UPF0176 protein SPD	SPD_0091	48	SPD_0091	Unknown function	Unknown function	Cytoplasmic	328
gi|116076714	SPD_0092	A0A0H2ZMR2	Uncharacterized protein	SPD_0092	49	SPD_0092	Unknown function	Unknown function	Cytoplasmic	286
gi|116077450	SPD_0093	A0A0H2ZQV5	Membrane protein, putative	SPD_0093	50	SPD_0093	Unknown function	Unknown function	Membrane	354
gi|116076147	SPD_0094	A0A0H2ZLW1	Uncharacterized protein	SPD_0094	50	SPD_0094	Unknown function	Unknown function	Unknown	303
gi|116076937	SPD_0095	A0A0H2ZN93	Uncharacterized protein	SPD_0095	50	SPD_0095	Unknown function	Unknown function	Membrane	197
gi|116076302	SPD_0096	A0A0H2ZN96	Transcriptional regulator, PadR family protein	SPD_0096	50	SPD_0096	Transcription	Transcription factor	Unknown	108
gi|116076135	SPD_0097	A0A0H2ZLV2	Transporter, putative	cynX	51	CynX	Transport and binding proteins	Anions	Membrane	388
gi|116077261	SPD_0098	A0A0H2ZQH2	Glycosyl transferase, group 2 family protein	SPD_0098	52	SPD_0098	Carbohydrate metabolism	Fructose and mannose metabolism	Membrane	385
gi|116077775	SPD_0099	A0A0H2ZRZ4	Capsular polysaccharide biosynthesis protein	capD	52	CapD	Glycan biosynthesis and metabolism	Peptidoglycan biosynthesis	Membrane	616
gi|116076366	SPD_0101	A0A0H2ZND9	Hydrolase, haloacid dehalogenase-like family protein	gph	54	Gph	Carbohydrate metabolism	Glyoxylate and dicarboxylate metabolism	Cytoplasmic	210
gi|116077101	SPD_0102	A0A0H2ZPZ7	L-serine dehydratase, iron-sulfur-dependent, alpha subunit	sdhA	54	SdhA	Amino acid metabolism	Glycine, serine and threonine metabolism	Membrane	290
gi|116076700	SPD_0103	A0A0H2ZNL2	L-serine dehydratase, iron-sulfur-dependent, beta subunit	sdhB	54	SdhB	Amino acid metabolism	Glycine, serine and threonine metabolism	Cytoplasmic	223
gi|116077308	SPD_0104	A0A0H2ZQH1	LysM domain protein	SPD_0104	55	SPD_0104	Unknown function	Unknown function	Unknown	167
gi|116076425	SPD_0105	A0A0H2ZMV2	Uncharacterized protein	SPD_0105	56	SPD_0105	Unknown function	Unknown function	Unknown	82
gi|116077755	SPD_0106	A0A0H2ZRQ0	Bacteriocin, putative	SPD_0106	57	SPD_0106	Cellular processes	Toxin production and resistance	Unknown	82
gi|116076947	SPD_0107	A0A0H2ZNA1	Membrnae protein, putative	SPD_0107	57	SPD_0107	Cellular processes	Toxin production and resistance	Membrane	702
gi|116077561	SPD_0108	A0A0H2ZR74	Amino acid ABC transporter, ATP-binding protein, putative	macB_5	57	MacB_5	Transport and binding proteins	Amino acids, peptides and amines	Membrane	213
gi|116076753	SPD_0109	A0A0H2ZN67	Amino acid ABC transporter, periplasmic amino acid-binding protein, putative	artP_2	58	ArtP_2	Transport and binding proteins	Amino acids, peptides and amines	Unknown	268
gi|116076242	SPD_0110	Q04MW7	Argininosuccinate synthase	argG	58	ArgG	Amino acid metabolism	Alanine, aspartate and glutamate metabolism	Cytoplasmic	398
gi|116077523	SPD_0111	Q04MW6	Argininosuccinate lyase	argH	58	ArgH	Amino acid metabolism	Alanine, aspartate and glutamate metabolism	Unknown	463
gi|116075890	SPD_0112	A0A0H2ZKX1	Uncharacterized protein	SPD_0112	59	SPD_0112	Unknown function	Unknown function	Cytoplasmic	287
gi|116076910	SPD_0114	A0A0H2ZPL8	Uncharacterized protein	SPD_0114	61	SPD_0114	Unknown function	Unknown function	Cytoplasmic	155
gi|116077097	SPD_0115	A0A0H2ZQ33	Uncharacterized protein	SPD_0115	61	SPD_0115	Protein fate	Protein and peptide secretion and trafficking	Unknown	450
gi|116076467	SPD_0116	A0A0H2ZNL8	Uncharacterized protein	SPD_0116	62	SPD_0116	Unknown function	Unknown function	Membrane	126
gi|116076894	SPD_0117	A0A0H2ZPG0	Uncharacterized protein	SPD_0117	63	SPD_0117	Unknown function	Unknown function	Membrane	123
gi|116076296	SPD_0118	A0A0H2ZN92	Uncharacterized protein	SPD_0118	64	SPD_0118	Unknown function	Unknown function	Unknown	41
gi|116076056	SPD_0119	A0A0H2ZLQ0	Membrane protein, putative	SPD_0119	65	SPD_0119	Unknown function	Unknown function	Membrane	352
gi|116076477	SPD_0120	A0A0H2ZMZ8	Membrane protein, putative	SPD_0120	66	SPD_0120	Unknown function	Unknown function	Membrane	325
gi|116077132	SPD_0121	A0A0H2ZPP0	Uncharacterized protein	SPD_0121	67	SPD_0121	Unknown function	Unknown function	Membrane	124
gi|116076021	SPD_0122	A0A0H2ZMM9	Uncharacterized protein	SPD_0122	68	SPD_0122	Unknown function	Unknown function	Membrane	300
gi|116076745	SPD_0123	A0A0H2ZPA0	Uncharacterized protein	SPD_0123	68	SPD_0123	Unknown function	Unknown function	Membrane	117
gi|116076739	SPD_0124	A0A0H2ZP96	Membrane protein, putative	SPD_0124	68	SPD_0124	Unknown function	Unknown function	Membrane	252
gi|116077555	SPD_0125	A0A0H2ZPS3	Uncharacterized protein	SPD_0125	69	SPD_0125	Unknown function	Unknown function	Cytoplasmic	81
gi|116076452	SPD_0126	A0A0H2ZMX6	Pneumococcal surface protein A	pspA	70	PsPA	Cellular processes	Pathogenesis	Extracellular	619
gi|116077333	SPD_0127	Q04MV1	tRNA-specific 2-thiouridylase MnmA	mnmA	71	MnmA	Protein synthesis	tRNA and rRNA base modification	Cytoplasmic	373
gi|116077020	SPD_0128	A0A0H2ZNG9	MutT/nudix family protein	trmU	72	TrmU	Unknown function	Unknown function	Cytoplasmic	151
gi|116075888	SPD_0129	Q04MU9	tRNA uridine 5-carboxymethylaminomethyl modification enzyme MnmG	gidA	72	GidA	Protein synthesis	tRNA and rRNA base modification	Cytoplasmic	637
gi|116076736	SPD_0130	A0A0H2ZMS9	Metallo-beta-lactamase superfamily protein domain protein	rnj	73	Rnj	Transcription	Degradation of RNA	Cytoplasmic	559
gi|116076148	SPD_0131	Q04MU7	UPF0356 protein SPD	SPD_0131	73	SPD_0131	Unknown function	Unknown function	Cytoplasmic	77
gi|116077171	SPD_0132	A0A0H2ZQ79	Uncharacterized protein	SPD_0132	74	SPD_0132	Unknown function	Unknown function	Extracellular	50
gi|116077367	SPD_0133	A0A0H2ZQ92	Uncharacterized protein	cibA	74	CibA	Unknown function	Unknown function	Membrane	61
gi|116077352	SPD_0134	A0A0H2ZPI7	Uncharacterized protein	ydiC	75	YdiC	Protein synthesis	tRNA and rRNA base modification	Membrane	227
gi|116076751	SPD_0135	A0A0H2ZNQ1	Ribosomal-protein-alanine acetyltransferase	rimI	75	RimI	Protein synthesis	Ribosomal proteins	Unknown	145
gi|116077639	SPD_0136	Q04MU2	tRNA N6-adenosine threonylcarbamoyltransferase	tsaD	75	TsaD	Protein synthesis	tRNA and rRNA base modification	Cytoplasmic	336
gi|116076904	SPD_0138	A0A0H2ZNI1	Glycosyl transferase, group 1 family protein	SPD_0138	77	SPD_0138	Carbohydrate metabolism	Fructose and mannose metabolism	Cytoplasmic	401
gi|116077481	SPD_0139	A0A0H2ZQY6	Glycosyl transferase, group 2 family protein	wcaA	77	WcaA	Unknown function	Unknown function	Membrane	317
gi|116077273	SPD_0140	A0A0H2ZP40	ABC transporter, ATP-binding protein	ABCC-BAC	77	ABCC-BAC	Transport and binding proteins	Other transport and binding proteins	Membrane	538
gi|116075993	SPD_0141	A0A0H2ZL78	Uncharacterized protein	SPD_0141	78	SPD_0141	Unknown function	Unknown function	Cytoplasmic	155
gi|116077048	SPD_0142	A0A0H2ZPV2	Uncharacterized protein	SPD_0142	78	SPD_0142	Unknown function	Unknown function	Cytoplasmic	251
gi|116075916	SPD_0143	A0A0H2ZLQ4	UDP-glucose 6-dehydrogenase, putative	ugd	78	Ugd	Carbohydrate metabolism	Amino sugar and nucleotide sugar metabolism	Cytoplasmic	390
gi|116077193	SPD_0144	A0A0H2ZP86	Transcriptional regulator	SPD_0144	79	SPD_0144	Regulatory functions	DNA interactions	Cytoplasmic	287
gi|116076665	SPD_0145	A0A0H2ZNW2	Uncharacterized protein	SPD_0145	80	SPD_0145	Unknown function	Unknown function	Unknown	77
gi|116076928	SPD_0146	A0A0H2ZP35	CAAX amino terminal protease family protein	SPD_0146	80	SPD_0146	Protein fate	Degradation of proteins, peptides and glycopeptides	Membrane	225
gi|116076402	SPD_0147	A0A0H2ZMC7	CAAX amino terminal protease family protein	SPD_0147	80	SPD_0147	Protein fate	Degradation of proteins, peptides and glycopeptides	Membrane	221
gi|116077637	SPD_0148	A0A0H2ZQ01	Transporter, major facilitator family protein	SPD_0148	81	SPD_0148	Transport and binding proteins	Unknown substrate	Membrane	408
gi|116077142	SPD_0149	A0A0H2ZNR8	Uncharacterized protein	SPD_0149	82	SPD_0149	Unknown function	Unknown function	Membrane	157
gi|116077674	SPD_0150	A0A0H2ZR50	ABC transporter, substrate-binding protein	SPD_0150	82	SPD_0150	Transport and binding proteins	Amino acids, peptides and amines	Unknown	276
gi|116077023	SPD_0151	A0A0H2ZPC6	Lipoprotein	metQ	83	MetQ	Transport and binding proteins	Other transport and binding proteins	Membrane	284
gi|116075963	SPD_0152	A0A0H2ZLI6	Peptidase, M20/M25/M40 family protein	dapE	84	DapE	Amino acid metabolism	Lysine biosynthesis	Cytoplasmic	457
gi|116076404	SPD_0153	A0A0H2ZNA0	Methionine import ATP-binding protein MetN	metN	84	MetN	Transport and binding proteins	Amino acids, peptides and amines	Membrane	353
gi|116077687	SPD_0154	A0A0H2ZRJ0	ABC transporter, permease protein, putative	metI	84	MetI	Transport and binding proteins	Other transport and binding proteins	Membrane	230
gi|116077299	SPD_0155	A0A0H2ZPF5	Membrane protein, putative	SPD_0155	85	SPD_0155	Unknown function	Unknown function	Membrane	189
gi|116076241	SPD_0156	A0A0H2ZMX4	Membrane protein, putative	SPD_0156	86	SPD_0156	Unknown function	Unknown function	Membrane	204
gi|116075893	SPD_0157	A0A0H2ZM94	Sensor histidine kinase, putative	yesM	86	YesM	Signal transduction	Two-component system	Membrane	548
gi|116077236	SPD_0158	A0A0H2ZQE7	DNA-binding response regulator	yesN	86	YesN	Signal transduction	Two-component system	Cytoplasmic	428
gi|116076836	SPD_0159	A0A0H2ZPA5	Membrane protein putative	SPD_0159	86	SPD_0159	Unknown function	Unknown function	Membrane	177
gi|116076653	SPD_0160	A0A0H2ZML8	NrdI protein, putative	SPD_0160	87	SPD_0160	Unknown function	Unknown function	Unknown	156
gi|116077465	SPD_0161	A0A0H2ZPK9	Membrane protein, putative	SPD_0161	88	SPD_0161	Unknown function	Unknown function	Membrane	420
gi|116076438	SPD_0162	A0A0H2ZMW3	Membrane protein, putative	SPD_0162	89	SPD_0162	Unknown function	Unknown function	Membrane	152
gi|116077278	SPD_0163	A0A0H2ZPD9	Uncharacterized protein	SPD_0163	90	SPD_0163	Transcription	Transcription factor	Cytoplasmic	146
gi|116076158	SPD_0164	A0A0H2ZMZ0	Uncharacterized protein	SPD_0164	91	SPD_0164	Unknown function	Unknown function	Membrane	59
gi|116076972	SPD_0165	Q04MR4	DNA mismatch repair protein MutL	mutL	91	MutL	DNA metabolism	DNA replication, recombination and repair	Cytoplasmic	649
gi|116077714	SPD_0166	Q04MR3	6,7-dimethyl-8-ribityllumazine synthase	ribH	92	RibH	Metabolism of cofactors and vitamins	Riboflavin metabolism	Cytoplasmic	155
gi|116076680	SPD_0167	A0A0H2ZMP2	Riboflavin biosynthesis protein RibBA	ribB	92	RibB	Metabolism of cofactors and vitamins	Riboflavin metabolism	Cytoplasmic	401
gi|116077373	SPD_0168	A0A0H2ZQT1	Riboflavin synthase, alpha subunit	ribE	92	RibE	Metabolism of cofactors and vitamins	Riboflavin metabolism	Cytoplasmic	211
gi|116076349	SPD_0169	A0A0H2ZLX4	Riboflavin biosynthesis protein RibD	ribD	92	RibD	Metabolism of cofactors and vitamins	Riboflavin metabolism	Cytoplasmic	366
gi|116076058	SPD_0170	Q04MQ9	Holliday junction ATP-dependent DNA helicase RuvA	ruvA	93	RuvA	DNA metabolism	DNA replication, recombination and repair	Cytoplasmic	197
gi|116077044	SPD_0171	A0A0H2ZNT9	DNA-3-methyladenine glycosylase I	tag	93	Tag	DNA metabolism	DNA replication, recombination and repair	Unknown	187
gi|116076279	SPD_0172	A0A0H2ZLT4	CAAX amino terminal protease family protein	SPD_0172	93	SPD_0172	Protein fate	Degradation of proteins, peptides and glycopeptides	Membrane	225
gi|116077092	SPD_0173	A0A0H2ZQ27	MccC family protein	SPD_0173	94	SPD_0173	Protein fate	Degradation of proteins, peptides and glycopeptides	Cytoplasmic	343
gi|116077497	SPD_0174	A0A0H2ZPN0	Membrnae protein, putative	SPD_0174	95	SPD_0174	Unknown function	Unknown function	Membrane	234
gi|116076389	SPD_0175	A0A0H2ZMR3	Magnesium transporter, CorA family protein	corA	95	CorA	Transport and binding proteins	Cations and iron carrying compounds	Membrane	314
gi|116077701	SPD_0176	A0A0H2ZQ77	UvrABC system protein A	uvrA	96	UvrA	DNA metabolism	DNA replication, recombination and repair	Membrane	943
gi|116076711	SPD_0177	A0A0H2ZP73	Peptidase M24 family protein	pepP	96	PepP	Protein fate	Degradation of proteins, peptides and glycopeptides	Cytoplasmic	353
gi|116077009	SPD_0178	A0A0H2ZPS1	Uncharacterized protein	spxA	97	SpxA	Regulatory functions	DNA interactions	Cytoplasmic	132
gi|116075979	SPD_0179	A0A0H2ZMJ7	Lipoprotein, putative	SPD_0179	98	SPD_0179	Unknown function	Unknown function	Unknown	189
gi|116076936	SPD_0180	Q04MP9	UPF0297 protein SPD	SPD_0180	99	SPD_0180	Unknown function	Unknown function	Unknown	88
gi|116076395	SPD_0181	Q04MP8	Putative Holliday junction resolvase	SPD_0181	99	SPD_0181	DNA metabolism	DNA replication, recombination and repair	Cytoplasmic	139
gi|116077259	SPD_0182	Q04MP7	UPF0473 protein SPD	SPD_0182	99	SPD_0182	Unknown function	Unknown function	Cytoplasmic	101
gi|116077070	SPD_0183	A0A0H2ZQ04	Folylpolyglutamate synthase	folC	100	FolC	Metabolism of cofactors and vitamins	Folate biosynthesis	Cytoplasmic	418
gi|116076100	SPD_0184	A0A0H2ZMT9	Lipoprotein, putative	SPD_0184	101	SPD_0184	Unknown function	Unknown function	Extracellular	143
gi|116077256	SPD_0185	A0A0H2ZPC3	Cardiolipin synthetase	cls	102	Cls	Lipid metabolism	Glycerophospholipid metabolism	Membrane	510
gi|116076168	SPD_0186	A0A0H2ZMA6	Competence-induced protein Ccs4	SPD_0186	103	SPD_0186	Unknown function	Unknown function	Membrane	512
gi|116077463	SPD_0187	A0A0H2ZR20	Anaerobic ribonucleoside-triphosphate reductase	nrdD	104	NrdD	Nucleotide metabolism	Purine metabolism	Cytoplasmic	735
gi|116076435	SPD_0188	A0A0H2ZM37	Uncharacterized protein	SPD_0188	104	SPD_0188	Unknown function	Unknown function	Extracellular	46
gi|116077798	SPD_0189	A0A0H2ZS14	Acetyltransferase, GNAT family protein	SPD_0189	104	SPD_0189	Unknown function	Unknown function	Cytoplasmic	168
gi|116077021	SPD_0190	A0A0H2ZPT0	Anaerobic ribonucleoside-triphosphate reductase-activating protein	nrdG	104	NrdG	Protein fate	Protein modification and repair	Cytoplasmic	196
gi|116077564	SPD_0191	A0A0H2ZPZ6	Uncharacterized protein	SPD_0191	104	SPD_0191	Unknown function	Unknown function	Cytoplasmic	205
gi|116077239	SPD_0192	Q04MN7	30S ribosomal protein S10	rpsJ	105	RpsJ	Protein synthesis	Ribosomal proteins	Cytoplasmic	102
gi|116077301	SPD_0193	Q04MN6	50S ribosomal protein L3	rplC	105	RplC	Protein synthesis	Ribosomal proteins	Cytoplasmic	208
gi|116075942	SPD_0194	Q04MN5	50S ribosomal protein L4	rplD	105	RplD	Protein synthesis	Ribosomal proteins	Unknown	207
gi|116076406	SPD_0195	Q04MN4	50S ribosomal protein L23	rplW	105	RplW	Protein synthesis	Ribosomal proteins	Cytoplasmic	98
gi|116076214	SPD_0196	Q04MN3	50S ribosomal protein L2	rplB	105	RplB	Protein synthesis	Ribosomal proteins	Unknown	277
gi|116076688	SPD_0197	Q04MN2	30S ribosomal protein S19	rpsS	105	RpsS	Protein synthesis	Ribosomal proteins	Cytoplasmic	93
gi|116077772	SPD_0198	Q04MN1	50S ribosomal protein L22	rplV	105	RplV	Protein synthesis	Ribosomal proteins	Cytoplasmic	114
gi|116075978	SPD_0199	Q04MN0	30S ribosomal protein S3	rpsC	105	RpsC	Protein synthesis	Ribosomal proteins	Cytoplasmic	217
gi|116076203	SPD_0200	Q04MM9	50S ribosomal protein L16	rplP	105	RplP	Protein synthesis	Ribosomal proteins	Cytoplasmic	137
gi|116077514	SPD_0201	Q04MM8	50S ribosomal protein L29	rpmC	105	RpmC	Protein synthesis	Ribosomal proteins	Unknown	68
gi|116076431	SPD_0202	Q04MM7	30S ribosomal protein S17	rpsQ	105	RpsQ	Protein synthesis	Ribosomal proteins	Cytoplasmic	86
gi|116077602	SPD_0203	Q04MM6	50S ribosomal protein L14	rplN	105	RplN	Protein synthesis	Ribosomal proteins	Cytoplasmic	122
gi|116076626	SPD_0204	Q04MM5	50S ribosomal protein L24	rplX	105	RplX	Protein synthesis	Ribosomal proteins	Cytoplasmic	101
gi|116076010	SPD_0205	Q04MM4	50S ribosomal protein L5	rplE	105	RplE	Protein synthesis	Ribosomal proteins	Cytoplasmic	180
gi|116076887	SPD_0206	Q04MM3	30S ribosomal protein S14	rpsN	105	RpsN	Protein synthesis	Ribosomal proteins	Cytoplasmic	89
gi|116076281	SPD_0207	Q04MM2	30S ribosomal protein S8	rpsH	105	RpsH	Protein synthesis	Ribosomal proteins	Cytoplasmic	132
gi|116077516	SPD_0208	Q04MM1	50S ribosomal protein L6	rplF	105	RplF	Protein synthesis	Ribosomal proteins	Cytoplasmic	178
gi|116076447	SPD_0209	Q04MM0	50S ribosomal protein L18	rplR	105	RplR	Protein synthesis	Ribosomal proteins	Cytoplasmic	118
gi|116076071	SPD_0210	Q04ML9	30S ribosomal protein S5	rpsE	105	RpsE	Protein synthesis	Ribosomal proteins	Cytoplasmic	164
gi|116077312	SPD_0211	Q04ML8	50S ribosomal protein L30	rpmD	105	RpmD	Protein synthesis	Ribosomal proteins	Cytoplasmic	60
gi|116075961	SPD_0212	Q04ML7	50S ribosomal protein L15	rplO	105	RplO	Protein synthesis	Ribosomal proteins	Unknown	146
gi|116077491	SPD_0213	A0A0H2ZPM6	Protein translocase subunit SecY	secY	105	SecY	Protein fate	Protein and peptide secretion and trafficking	Membrane	436
gi|116076453	SPD_0214	Q04ML5	Adenylate kinase	adk	105	Adk	Nucleotide metabolism	Purine metabolism	Cytoplasmic	212
gi|116077693	SPD_0215	Q04ML4	Translation initiation factor IF-1	infA	105	InfA	Protein synthesis	Translation factors	Cytoplasmic	72
gi|116076623	SPD_0216	Q04ML3	30S ribosomal protein S13	rpsM	105	RpsM	Protein synthesis	Ribosomal proteins	Cytoplasmic	121
gi|116076017	SPD_0217	Q04ML2	30S ribosomal protein S11	rpsK	105	RpsK	Protein synthesis	Ribosomal proteins	Cytoplasmic	127
gi|116076869	SPD_0218	Q04ML1	DNA-directed RNA polymerase subunit alpha	rpoA	105	RpoA	Transcription	RNA polymerase	Cytoplasmic	311
gi|116076023	SPD_0219	Q04ML0	50S ribosomal protein L17	rplQ	105	RplQ	Protein synthesis	Ribosomal proteins	Cytoplasmic	128
gi|116077220	SPD_0220	A0A0H2ZQA5	UPF0237 protein SPD	SPD_0220	106	SPD_0220	Unknown function	Unknown function	Membrane	88
gi|116077063	SPD_0222	A0A0H2ZPG4	Phosphoglycerate mutase family protein	gpmB	108	GpmB	Carbohydrate metabolism	Glycolysis / Gluconeogenesis	Cytoplasmic	230
gi|116076204	SPD_0223	A0A0H2ZLZ8	Iron(III) ABC transporter, permease protein	SPD_0223	109	SPD_0223	Transport and binding proteins	Cations and iron carrying compounds	Membrane	330
gi|116077302	SPD_0224	A0A0H2ZQG4	Iron(III) ABC transporter, permease protein	SPD_0224	109	SPD_0224	Transport and binding proteins	Cations and iron carrying compounds	Membrane	208
gi|116077390	SPD_0225	A0A0H2ZQA6	ABC transporter, ATP-binding protein	SPD_0225	109	SPD_0225	Transport and binding proteins	Cations and iron carrying compounds	Membrane	363
gi|116076392	SPD_0226	A0A0H2ZM05	Iron ABC transporter, iron-binding protein	SPD_0226	109	SPD_0226	Transport and binding proteins	Cations and iron carrying compounds	Unknown	122
gi|116077549	SPD_0227	A0A0H2ZPY4	Iron(III) ABC transporter, iron-binding protein	SPD_0227	110	SPD_0227	Transport and binding proteins	Cations and iron carrying compounds	Unknown	64
gi|116076720	SPD_0228	A0A0H2ZMR6	Transcriptional regulator, AraC family protein	SPD_0228	111	SPD_0228	Transcription	Transcription factor	Cytoplasmic	65
gi|116077762	SPD_0229	A0A0H2ZRH1	Glycyl-radical enzyme activating protein family protein	SPD_0229	112	SPD_0229	Carbohydrate metabolism	Pyruvate metabolism	Cytoplasmic	258
gi|116076868	SPD_0230	A0A0H2ZPI6	Transcriptional regulator, DeoR family protein	srlR	113	SrlR	Transcription	Transcription factor	Cytoplasmic	248
gi|116077778	SPD_0231	A0A0H2ZRV1	Transcriptional activator	SPD_0231	113	SPD_0231	Transcription	Transcription factor	Cytoplasmic	326
gi|116077268	SPD_0232	A0A0H2ZP36	PTS system, IIA component	celC	114	CelC	Transport and binding proteins	Carbohydrates, organic alcohols and acids	Cytoplasmic	106
gi|116076034	SPD_0233	A0A0H2ZLA9	PTS system, IIB component	celA	114	CelA	Transport and binding proteins	Carbohydrates, organic alcohols and acids	Cytoplasmic	102
gi|116077272	SPD_0234	A0A0H2ZPD6	Permease IIC component	celB	114	CelB	Transport and binding proteins	Carbohydrates, organic alcohols and acids	Membrane	432
gi|116076153	SPD_0235	A0A0H2ZLW6	Pyruvate formate-lyase	pfl	114	Pfl	Carbohydrate metabolism	Pyruvate metabolism	Cytoplasmic	812
gi|116077513	SPD_0236	A0A0H2ZPP4	Transaldolase, putative	talC	114	TalC	Carbohydrate metabolism	Pentose phosphate pathway	Cytoplasmic	222
gi|116076472	SPD_0237	A0A0H2ZMZ2	Glycerol dehydrogenase	gldA	114	GldA	Carbohydrate metabolism	Propanoate metabolism	Cytoplasmic	362
gi|116077781	SPD_0238	Q04MJ2	Leucine--tRNA ligase	leuS	115	LeuS	Protein synthesis	tRNA aminoacylation	Cytoplasmic	833
gi|116076468	SPD_0239	A0A0H2ZMG2	Acetyltransferase, GNAT family protein	SPD_0239	116	SPD_0239	Unknown function	Unknown function	Cytoplasmic	231
gi|116077740	SPD_0240	A0A0H2ZRB7	Acetyltransferase, GNAT family protein	SPD_0240	116	SPD_0240	Unknown function	Unknown function	Unknown	138
gi|116076382	SPD_0241	Q04MI9	Holliday junction ATP-dependent DNA helicase RuvB	ruvB	117	RuvB	DNA metabolism	DNA replication, recombination and repair	Cytoplasmic	332
gi|116076956	SPD_0242	A0A0H2ZPQ6	Uncharacterized protein	SPD_0242	117	SPD_0242	Protein synthesis	tRNA aminoacylation	Cytoplasmic	190
gi|116076117	SPD_0243	A0A0H2ZMV5	Isoprenyl transferase	uppS	118	UppS	Metabolism of terpenoids and polyketides	Terpenoid backbone biosynthesis	Cytoplasmic	252
gi|116077204	SPD_0244	A0A0H2ZQ96	Phosphatidate cytidylyltransferase	cdsA	118	CdsA	Lipid metabolism	Glycerophospholipid metabolism	Membrane	267
gi|116076276	SPD_0245	A0A0H2ZMH0	Zinc metalloprotease Eep	eep	118	Eep	Protein fate	Degradation of proteins, peptides and glycopeptides	Membrane	419
gi|116076539	SPD_0246	Q04MI4	Proline--tRNA ligase	proS	118	ProS	Protein synthesis	tRNA aminoacylation	Cytoplasmic	617
gi|116077126	SPD_0247	A0A0H2ZQ21	Glycosyl hydrolase, family protein 1	bglA	119	BglA	Carbohydrate metabolism	Glycolysis / Gluconeogenesis	Cytoplasmic	459
gi|116076770	SPD_0248	A0A0H2ZP45	Glutamine--fructose-6-phosphate aminotransferase [isomerizing]	glmS	120	GlmS	Amino acid metabolism	Alanine, aspartate and glutamate metabolism	Cytoplasmic	602
gi|116076033	SPD_0249	A0A0H2ZLN3	Uncharacterized protein	SPD_0249	121	SPD_0249	Unknown function	Unknown function	Cytoplasmic	349
gi|116075975	SPD_0250	A0A0H2ZL64	Pullulanase, extracellular	amyA	122	AmyA	Carbohydrate metabolism	Starch and sucrose metabolism	Cellwall	1256
gi|116076885	SPD_0251	Q04MH9	30S ribosomal protein S12	rpsL	123	RpsL	Protein synthesis	Ribosomal proteins	Cytoplasmic	137
gi|116077493	SPD_0252	Q04MH8	30S ribosomal protein S7	rpsG	123	RpsG	Protein synthesis	Ribosomal proteins	Cytoplasmic	156
gi|116077328	SPD_0253	Q04MH7	Elongation factor G	fusA	124	FusA	Protein synthesis	Translation factors	Cytoplasmic	693
gi|116076422	SPD_0254	Q04MH6	DNA polymerase III PolC-type	polC	124	PolC	DNA metabolism	DNA replication, recombination and repair	Cytoplasmic	1463
gi|116077462	SPD_0255	A0A0H2ZQG1	Addiction module antitoxin, RelB/DinJ family protein, putative	SPD_0255	125	SPD_0255	Cellular processes	Biofilm formation	Unknown	87
gi|116076692	SPD_0256	A0A0H2ZMQ0	Uncharacterized protein	yafQ	125	YafQ	Cellular processes	Biofilm formation	Cytoplasmic	92
gi|116077027	SPD_0257	A0A0H2ZNS6	Uncharacterized protein	SPD_0257	125	SPD_0257	Unknown function	Unknown function	Unknown	50
gi|116077228	SPD_0258	A0A0H2ZQA9	Aminopeptidase PepS	pepS	125	PepS	Protein fate	Degradation of proteins, peptides and glycopeptides	Cytoplasmic	413
gi|116076926	SPD_0259	A0A0H2ZN85	Transglycosylase associated protein	SPD_0259	125	SPD_0259	Unknown function	Unknown function	Membrane	76
gi|116076624	SPD_0260	A0A0H2ZP13	Pseudouridine synthase	rsuA-1	126	RsuA-1	Protein synthesis	tRNA and rRNA base modification	Cytoplasmic	240
gi|116077489	SPD_0261	A0A0H2ZR44	Aminopeptidase C	pepC	127	PepC	Protein fate	Degradation of proteins, peptides and glycopeptides	Cytoplasmic	444
gi|116077531	SPD_0262	A0A0H2ZQN6	PTS system, mannose/fructose/sorbose family protein, IID component	SPD_0262	128	SPD_0262	Transport and binding proteins	Carbohydrates, organic alcohols and acids	Membrane	303
gi|116076439	SPD_0263	A0A0H2ZNJ8	PTS system, mannose-specific IIC component	manM	128	ManM	Transport and binding proteins	Carbohydrates, organic alcohols and acids	Membrane	267
gi|116076368	SPD_0264	A0A0H2ZLY8	PTS system, mannose-specific IIAB components	manL	128	ManL	Transport and binding proteins	Carbohydrates, organic alcohols and acids	Cytoplasmic	329
gi|116077095	SPD_0265	A0A0H2ZPZ1	Alcohol dehydrogenase, zinc-containing	adhA	129	AdhA	Carbohydrate metabolism	Glycolysis / Gluconeogenesis	Cytoplasmic	339
gi|116076979	SPD_0266	A0A0H2ZP83	Cof family protein	SPD_0266	130	SPD_0266	Unknown function	Enzymes of unknown specificity	Cytoplasmic	270
gi|116076064	SPD_0267	A0A0H2ZMJ6	Xanthine/uracil permease family protein	pbuO	131	PbuO	Transport and binding proteins	Nucleosides, purines and pyrimidines	Membrane	472
gi|116077154	SPD_0268	A0A0H2ZPT2	CAAX amino terminal protease family protein	SPD_0268	132	SPD_0268	Unknown function	Unknown function	Membrane	230
gi|116077229	SPD_0269	A0A0H2ZPY0	Dihydropteroate synthase	folP	132	FolP	Metabolism of cofactors and vitamins	Folate biosynthesis	Cytoplasmic	324
gi|116077321	SPD_0270	A0A0H2ZQI4	Folylpolyglutamate synthase	folC	132	FolC	Metabolism of cofactors and vitamins	Folate biosynthesis	Cytoplasmic	440
gi|116076521	SPD_0271	Q04MF9	GTP cyclohydrolase 1	folE	132	FolE	Metabolism of cofactors and vitamins	Folate biosynthesis	Cytoplasmic	184
gi|116077650	SPD_0272	A0A0H2ZRK9	Bifunctional folate synthesis protein	sulD	132	SulD	Metabolism of cofactors and vitamins	Folate biosynthesis	Cytoplasmic	270
gi|116076767	SPD_0273	A0A0H2ZN76	Uncharacterized protein	SPD_0273	133	SPD_0273	Unknown function	Unknown function	Unknown	123
gi|116076747	SPD_0274	A0A0H2ZMT8	50S ribosomal protein L13	rplM	134	RplM	Protein synthesis	Ribosomal proteins	Unknown	148
gi|116077681	SPD_0275	Q04MF5	30S ribosomal protein S9	rpsI	134	RpsI	Protein synthesis	Ribosomal proteins	Cytoplasmic	130
gi|116077138	SPD_0276	A0A0H2ZPP5	Uncharacterized protein	SPD_0276	135	SPD_0276	Unknown function	Unknown function	Unknown	121
gi|116075941	SPD_0277	A0A0H2ZM73	6-phospho-beta-glucosidase	celA	136	CelA	Carbohydrate metabolism	Glycolysis / Gluconeogenesis	Cytoplasmic	478
gi|116076252	SPD_0278	A0A0H2ZMY4	Uncharacterized protein	SPD_0278	136	SPD_0278	Unknown function	Unknown function	Membrane	79
gi|116077653	SPD_0279	A0A0H2ZRG9	PTS system, IIB component	celB	136	CelB	Transport and binding proteins	Carbohydrates, organic alcohols and acids	Cytoplasmic	104
gi|116077103	SPD_0280	A0A0H2ZQ37	Transcriptional regulator, putative	SPD_0280	136	SPD_0280	Transcription	Transcription factor	Cytoplasmic	657
gi|116076306	SPD_0281	A0A0H2ZN30	PTS system, IIA component	celC	136	CelC	Transport and binding proteins	Carbohydrates, organic alcohols and acids	Cytoplasmic	104
gi|116076077	SPD_0282	A0A0H2ZMR9	Membrane protein, putative	SPD_0282	137	SPD_0282	Unknown function	Unknown function	Membrane	168
gi|116077122	SPD_0283	A0A0H2ZPM8	Permease IIC component	celD	138	CelD	Transport and binding proteins	Carbohydrates, organic alcohols and acids	Membrane	448
gi|116076318	SPD_0284	A0A0H2ZM72	Uncharacterized protein	SPD_0284	139	SPD_0284	Unknown function	Unknown function	Cytoplasmic	58
gi|116077189	SPD_0285	A0A0H2ZNX8	Glycosyl hydrolase, family protein 31	xylS	140	XylS	Carbohydrate metabolism	Carbohydrate metabolism - Other	Cytoplasmic	737
gi|116077426	SPD_0286	A0A0H2ZQC6	Glutathione peroxidase	SPD_0286	141	SPD_0286	Metabolism of other amino acids	Glutathione metabolism	Cytoplasmic	158
gi|116076553	SPD_0287	A0A0H2ZNM5	Hyaluronate lyase	SPD_0287	142	SPD_0287	Glycan biosynthesis and metabolism	Glycan biosynthesis and metabolism - Other	Cellwall	1067
gi|116076146	SPD_0289	A0A0H2ZMY0	4-hydroxy-2-oxoglutarate aldolase/2-deydro-3-deoxyphosphogluconate aldolase	eda	144	Eda	Carbohydrate metabolism	Glyoxylate and dicarboxylate metabolism	Cytoplasmic	209
gi|116077028	SPD_0290	A0A0H2ZNH2	Carbohydrate kinase, PfkB family protein	kdgK	144	KdgK	Carbohydrate metabolism	Pentose phosphate pathway	Cytoplasmic	333
gi|116075927	SPD_0291	A0A0H2ZM59	Ribose 5-phosphate isomerase, putative	SPD_0291	144	SPD_0291	Carbohydrate metabolism	Pentose phosphate pathway	Cytoplasmic	213
gi|116077415	SPD_0292	A0A0H2ZQC1	Oxidoreductase, short chain dehydrogenase/reductase family protein	gno	144	Gno	Unknown function	Unknown function	Cytoplasmic	271
gi|116076134	SPD_0293	A0A0H2ZMX1	PTS system, IIA component	agaF	145	AgaF	Transport and binding proteins	Carbohydrates, organic alcohols and acids	Cytoplasmic	144
gi|116077662	SPD_0294	A0A0H2ZR34	Glucuronyl hydrolase	ugl	146	Ugl	Unknown function	Unknown function	Cytoplasmic	396
gi|116076399	SPD_0295	A0A0H2ZN95	PTS system, IIB component	SPD_0295	147	SPD_0295	Transport and binding proteins	Carbohydrates, organic alcohols and acids	Cytoplasmic	163
gi|116075980	SPD_0296	A0A0H2ZLJ9	PTS system, IIC component	SPD_0296	147	SPD_0296	Transport and binding proteins	Carbohydrates, organic alcohols and acids	Membrane	259
gi|116076663	SPD_0297	A0A0H2ZMZ6	PTS system, IID component	SPD_0297	147	SPD_0297	Transport and binding proteins	Carbohydrates, organic alcohols and acids	Membrane	272
gi|116076206	SPD_0298	A0A0H2ZMV1	Preprotein translocase, YajC subunit	yajC-1	147	YajC-1	Transcription	Protein export	Membrane	88
gi|116077410	SPD_0300	A0A0H2ZQW7	Uncharacterized protein	SPD_0300	147	SPD_0300	Unknown function	Unknown function	Cytoplasmic	612
gi|116076268	SPD_0301	A0A0H2ZM41	Sugar binding transcriptional regulator RegR	regR	147	RegR	Transcription	Transcription factor	Cytoplasmic	333
gi|116077176	SPD_0302	A0A0H2ZNW8	Uncharacterized protein	SPD_0302	148	SPD_0302	Unknown function	Unknown function	Unknown	80
gi|116076097	SPD_0303	A0A0H2ZLF3	Transcriptional regulator, putative	SPD_0303	148	SPD_0303	Unknown function	Unknown function	Cytoplasmic	64
gi|116076018	SPD_0304	Q04MC7	Ribosomal RNA small subunit methyltransferase H	mraW	149	MraW	Glycan biosynthesis and metabolism	Peptidoglycan biosynthesis	Cytoplasmic	316
gi|116076794	SPD_0305	A0A0H2ZP65	Cell division protein FtsL	ftsL	149	FtsL	Cellular processes	Cell division	Cytoplasmic	105
gi|116077613	SPD_0306	A0A0H2ZRH4	Penicillin-binding protein 2X	pbpX	149	PbpX	Cellular processes	Toxin production and resistance	Membrane	750
gi|116076524	SPD_0307	Q04MC4	Phospho-N-acetylmuramoyl-pentapeptide-transferase	mraY	149	MraY	Glycan biosynthesis and metabolism	Peptidoglycan biosynthesis	Membrane	326
gi|116076544	SPD_0308	A0A0H2ZMB9	ATP-dependent Clp protease, ATP-binding subunit	clpL	150	ClpL	Protein fate	Degradation of proteins, peptides and glycopeptides	Cytoplasmic	701
gi|116076775	SPD_0309	Q04MC2	S-ribosylhomocysteine lyase	luxS	151	LuxS	Amino acid metabolism	Cysteine and methionine metabolism	Cytoplasmic	160
gi|116076760	SPD_0310	Q04MC1	UPF0371 protein SPD	SPD_0310	152	SPD_0310	Unknown function	Unknown function	Cytoplasmic	494
gi|116077587	SPD_0311	A0A0H2ZQ08	Glucan 1,6-alpha-glucosidase	dexB	153	DexB	Carbohydrate metabolism	Starch and sucrose metabolism	Cytoplasmic	535
gi|116077304	SPD_0313	A0A0H2ZQL8	Uncharacterized protein	SPD_0313	155	SPD_0313	Unknown function	Unknown function	Extracellular	57
gi|4200422	SPD_0315	Q9ZII9	Cps2A	cps2A	157	Cps2A	DNA metabolism	DNA replication, recombination and repair	Membrane	481
gi|116076735	SPD_0316	Q9ZII8	Cps2B	cps2B	157	Cps2B	Unknown function	Unknown function	Cytoplasmic	243
gi|5776554	SPD_0317	Q9ZII7	Chain length determinant protein/polysaccharide export protein, MPA1 family protein	cps2C	157	Cps2C	Transport and binding proteins	Carbohydrates, organic alcohols and acids	Unknown	230
gi|4200425	SPD_0318	Q9ZII6	Cps2D	cps2D	157	Cps2D	Transport and binding proteins	Carbohydrates, organic alcohols and acids	Membrane	226
gi|4200426	SPD_0319	Q9ZII5	Cps2E	cps2E	157	Cps2E	Unknown function	Unknown function	Membrane	455
gi|4200439	SPD_0320	Q9ZII4	Cps2T	cps2T	157	Cps2T	Unknown function	Unknown function	Cytoplasmic	394
gi|116076827	SPD_0321	A0A0H2ZPF7	Glycosyl transferase, group 2 family protein	cps2F	157	Cps2F	Unknown function	Unknown function	Unknown	314
gi|116077269	SPD_0322	A0A0H2ZQD3	Glycosyl transferase, group 1 family protein	cps2G	157	Cps2G	Carbohydrate metabolism	Fructose and mannose metabolism	Cytoplasmic	348
gi|4200429	SPD_0323	Q9ZII1	Cps2H	csp2H	157	Csp2H	Unknown function	Unknown function	Membrane	387
gi|116077319	SPD_0324	Q9ZII0	Cps2I	cps2I	158	Cps2I	Carbohydrate metabolism	Fructose and mannose metabolism	Cytoplasmic	385
gi|4200431	SPD_0325	Q9ZIH9	Cps2J	cps2J	158	Cps2J	Carbohydrate metabolism	Carbohydrate metabolism - Other	Membrane	469
gi|116076609	SPD_0326	Q9ZIH8	Cps2K	cps2K	158	Cps2K	Carbohydrate metabolism	Amino sugar and nucleotide sugar metabolism	Membrane	412
gi|4200440	SPD_0327	Q9ZIH7	Cps2P	cps2P	158	Cps2P	Carbohydrate metabolism	Amino sugar and nucleotide sugar metabolism	Unknown	201
gi|4200433	SPD_0328	Q9ZIH6	Glucose-1-phosphate thymidylyltransferase	cps2L	158	Cps2L	Metabolism of terpenoids and polyketides	Polyketide sugar unit biosynthesis	Cytoplasmic	289
gi|4200434	SPD_0329	Q9ZIH5	Cps2M	rfbC	158	RfbC	Metabolism of terpenoids and polyketides	Polyketide sugar unit biosynthesis	Unknown	197
gi|4200435	SPD_0330	Q04MA3	dTDP-glucose 4,6-dehydratase	rfbB	158	RfbB	Metabolism of terpenoids and polyketides	Polyketide sugar unit biosynthesis	Cytoplasmic	349
gi|4200436	SPD_0331	Q04MA2	Cps2O	rfbD	158	RfbD	Metabolism of terpenoids and polyketides	Polyketide sugar unit biosynthesis	Cytoplasmic	283
gi|116077629	SPD_0333	A0A0H2ZR01	Uncharacterized protein	SPD_0333	160	SPD_0333	Unknown function	Unknown function	Unknown	52
gi|116076558	SPD_0334	A0A0H2ZNQ3	Oligopeptide ABC transporter, oligopeptide-binding protein AliA	aliA	161	AliA	Transport and binding proteins	Amino acids, peptides and amines	Cellwall	660
gi|116076037	SPD_0335	A0A0H2ZM17	Cell wall surface anchor family protein	SPD_0335	162	SPD_0335	Cellular processes	Pathogenesis	Cellwall	1767
gi|116076906	SPD_0336	A0A0H2ZPH2	Penicillin-binding protein 1A	pbp1A	163	Pbp1A	Glycan biosynthesis and metabolism	Peptidoglycan biosynthesis	Extracellular	719
gi|116076126	SPD_0337	Q04M97	Holliday junction resolvase RecU	recU	163	RecU	DNA metabolism	DNA replication, recombination and repair	Cytoplasmic	198
gi|116077474	SPD_0338	Q04M96	UPF0398 protein SPD	SPD_0338	164	SPD_0338	Unknown function	Unknown function	Unknown	175
gi|116076375	SPD_0339	Q04M95	Cell cycle protein GpsB	gpsB	164	GpsB	Cellular processes	Cell division	Cytoplasmic	109
gi|116077792	SPD_0341	A0A0H2ZS09	RNA methylase family protein UPF0020, putative	rlmL	166	RlmL	Unknown function	Unknown function	Cytoplasmic	385
gi|116076899	SPD_0342	A0A0H2ZPG7	Uncharacterized protein	mapZ	166	MapZ	Cellular processes	Cell division	Unknown	464
gi|116076029	SPD_0343	A0A0H2ZLA5	6-phosphogluconate dehydrogenase, decarboxylating	gnd	167	Gnd	Carbohydrate metabolism	Pentose phosphate pathway	Cytoplasmic	474
gi|116077231	SPD_0344	A0A0H2ZPA6	DNA-binding response regulator	cbpJ_2	167	CbpJ_2	Transcription	Transcription factor	Cytoplasmic	229
gi|116076074	SPD_0345	A0A0H2ZLD8	Choline binding protein C	cbpC	167	CbpC	Cellular processes	Pathogenesis	Unknown	338
gi|116077475	SPD_0346	A0A0H2ZQX9	Mevalonate kinase	mvk	168	Mvk	Metabolism of terpenoids and polyketides	Terpenoid backbone biosynthesis	Cytoplasmic	292
gi|116076351	SPD_0347	A0A0H2ZN59	Diphosphomevalonate decarboxylase	mvaD	168	MvaD	Metabolism of terpenoids and polyketides	Terpenoid backbone biosynthesis	Cytoplasmic	317
gi|116077694	SPD_0348	A0A0H2ZR70	Phosphomevalonate kinase	mvaK2	168	MvaK2	Metabolism of terpenoids and polyketides	Terpenoid backbone biosynthesis	Membrane	335
gi|116076344	SPD_0349	Q04M86	Isopentenyl-diphosphate delta-isomerase	fni	168	Fni	Metabolism of terpenoids and polyketides	Terpenoid backbone biosynthesis	Cytoplasmic	336
gi|116077557	SPD_0350	A0A0H2ZQR9	Uncharacterized protein	SPD_0350	169	SPD_0350	Unknown function	Unknown function	Membrane	232
gi|116076403	SPD_0351	A0A0H2ZM15	Sensor histidine kinase, putative	liaS	169	LiaS	Signal transduction	Two-component system	Membrane	331
gi|116077716	SPD_0352	A0A0H2ZRR6	DNA-binding response regulator	liaR	169	LiaR	Signal transduction	Two-component system	Cytoplasmic	210
gi|116076662	SPD_0353	A0A0H2ZP38	Uncharacterized protein	SPD_0353	169	SPD_0353	Unknown function	Unknown function	Unknown	48
gi|116077080	SPD_0355	A0A0H2ZPX6	Uncharacterized protein	SPD_0355	171	SPD_0355	Unknown function	Unknown function	Unknown	64
gi|116076443	SPD_0357	A0A0H2ZND3	Choline binding protein F	cbpF	173	CbpF	Cellular processes	Pathogenesis	Membrane	294
gi|116076669	SPD_0359	A0A0H2ZMZ7	Uncharacterized protein	SPD_0359	175	SPD_0359	Unknown function	Unknown function	Unknown	70
gi|116076317	SPD_0360	A0A0H2ZNA3	PTS system, mannitol-specific IIBC components	mtlA	176	MtlA	Transport and binding proteins	Carbohydrates, organic alcohols and acids	Membrane	589
gi|116077400	SPD_0361	A0A0H2ZQR1	Transcriptional regulator, putative	SPD_0361	176	SPD_0361	Unknown function	Unknown function	Cytoplasmic	651
gi|116076104	SPD_0362	A0A0H2ZMM6	PTS system, mannitol-specific enzyme IIA	mtlA2	176	MtlA2	Transport and binding proteins	Carbohydrates, organic alcohols and acids	Cytoplasmic	145
gi|116077104	SPD_0363	Q04M75	Mannitol-1-phosphate 5-dehydrogenase	mtlD	176	MtlD	Carbohydrate metabolism	Fructose and mannose metabolism	Cytoplasmic	378
gi|116076807	SPD_0364	A0A0H2ZP75	ABC-type polar amino acid transport system, ATPase component	SPD_0364	177	SPD_0364	Transport and binding proteins	Amino acids, peptides and amines	Unknown	37
gi|116077331	SPD_0365	Q04M73	Trigger factor	tig	178	Tig	Protein fate	Protein folding and stabilization	Cytoplasmic	427
gi|116076394	SPD_0366	A0A0H2ZMS3	Helicase, RecD/TraA family protein	recD	179	RecD	DNA metabolism	DNA replication, recombination and repair	Cytoplasmic	788
gi|116076257	SPD_0367	A0A0H2ZLR8	Signal peptidase I	lepB	180	LepB	Protein fate	Protein and peptide secretion and trafficking	Cellwall	204
gi|116076697	SPD_0368	Q04M70	Ribonuclease HIII	rnhC	180	RnhC	DNA metabolism	DNA replication, recombination and repair	Cytoplasmic	290
gi|116077495	SPD_0369	A0A0H2ZR51	Uncharacterized protein	SPD_0369	181	SPD_0369	Cellular processes	Cell division	Cytoplasmic	103
gi|116075970	SPD_0370	A0A0H2ZL61	CvpA family protein	SPD_0370	181	SPD_0370	Cellular processes	Toxin production and resistance	Membrane	182
gi|116077796	SPD_0371	Q04M67	Endonuclease MutS2	mutS2	182	MutS2	DNA metabolism	DNA replication, recombination and repair	Cytoplasmic	778
gi|116075899	SPD_0372	A0A0H2ZMA0	Sodium:alanine symporter family protein	SPD_0372	183	SPD_0372	Transport and binding proteins	Cations and iron carrying compounds	Membrane	440
gi|116077084	SPD_0373	A0A0H2ZNM1	Alkyl hydroperoxide reductase AhpD	SPD_0373	184	SPD_0373	Energy metabolism	Electron transport	Unknown	182
gi|116077190	SPD_0374	A0A0H2ZQ89	Exfoliative toxin, putative	shetA	185	ShetA	Transport and binding proteins	Carbohydrates, organic alcohols and acids	Membrane	299
gi|116076901	SPD_0375	Q04M63	Serine--tRNA ligase	serS	186	SerS	Protein synthesis	tRNA aminoacylation	Cytoplasmic	424
gi|116076963	SPD_0376	A0A0H2ZNM8	Uncharacterized protein	SPD_0376	187	SPD_0376	Unknown function	Unknown function	Unknown	123
gi|116076370	SPD_0377	A0A0H2ZN74	Aspartokinase	lysC	187	LysC	Amino acid metabolism	Glycine, serine and threonine metabolism	Cytoplasmic	454
gi|116077195	SPD_0378	A0A0H2ZQ93	Enoyl-CoA hydratase/isomerase family protein	fabM	188	FabM	Lipid metabolism	Fatty acid biosynthesis	Cytoplasmic	261
gi|116076603	SPD_0379	A0A0H2ZNZ9	Transcriptional regulator, MarR family protein	marR_1	188	MarR_1	Transcription	Transcription factor	Cytoplasmic	144
gi|116076576	SPD_0380	Q04M58	3-oxoacyl-[acyl-carrier-protein] synthase 3	fabH	188	FabH	Lipid metabolism	Fatty acid biosynthesis	Cytoplasmic	324
gi|116077422	SPD_0381	A0A0H2ZPN8	Acyl carrier protein	acpP	188	AcpP	Lipid metabolism	Fatty acid biosynthesis	Cytoplasmic	74
gi|116077089	SPD_0382	A0A0H2ZNM6	Trans-2-enoyl-ACP reductase II	fabK	188	FabK	Lipid metabolism	Fatty acid biosynthesis	Cytoplasmic	324
gi|116077624	SPD_0383	A0A0H2ZQZ1	Malonyl CoA-acyl carrier protein transacylase	fabD	188	FabD	Lipid metabolism	Fatty acid biosynthesis	Cytoplasmic	306
gi|116075958	SPD_0384	A0A0H2ZMC0	3-oxoacyl-(Acyl-carrier-protein) reductase	fabG	188	FabG	Lipid metabolism	Fatty acid biosynthesis	Cytoplasmic	243
gi|116076635	SPD_0385	A0A0H2ZMK1	3-oxoacyl-[acyl-carrier-protein] synthase 2	fabF	188	FabF	Lipid metabolism	Fatty acid biosynthesis	Membrane	411
gi|116076691	SPD_0386	A0A0H2ZN18	Acetyl-CoA carboxylase, biotin carboxyl carrier protein	accB	188	AccB	Lipid metabolism	Fatty acid biosynthesis	Unknown	161
gi|116077378	SPD_0387	Q04M51	3-hydroxyacyl-[acyl-carrier-protein] dehydratase FabZ	fabZ	188	FabZ	Lipid metabolism	Fatty acid biosynthesis	Cytoplasmic	140
gi|116076504	SPD_0388	A0A0H2ZNI3	Acetyl-CoA carboxylase, biotin carboxylase	accC	188	AccC	Lipid metabolism	Fatty acid biosynthesis	Cytoplasmic	455
gi|116076138	SPD_0389	A0A0H2ZMQ2	Acetyl-coenzyme A carboxylase carboxyl transferase subunit beta	accD	188	AccD	Lipid metabolism	Fatty acid biosynthesis	Cytoplasmic	288
gi|116076216	SPD_0390	Q04M48	Acetyl-coenzyme A carboxylase carboxyl transferase subunit alpha	accA	188	AccA	Lipid metabolism	Fatty acid biosynthesis	Cytoplasmic	255
gi|116076565	SPD_0391	A0A0H2ZNA9	Uncharacterized protein	SPD_0391	189	SPD_0391	Unknown function	Unknown function	Unknown	61
gi|116077399	SPD_0392	A0A0H2ZPF1	Uncharacterized protein	SPD_0392	190	SPD_0392	Unknown function	Unknown function	Unknown	70
gi|116076803	SPD_0393	Q04M45	N utilization substance protein B homolog	nusB	191	NusB	Transcription	Transcription factor	Cytoplasmic	140
gi|116076811	SPD_0394	A0A0H2ZNA2	Uncharacterized protein	SPD_0394	191	SPD_0394	Unknown function	Unknown function	Cytoplasmic	129
gi|116076755	SPD_0395	Q04M43	Elongation factor P	efp	191	Efp	Protein synthesis	Translation factors	Cytoplasmic	186
gi|116076202	SPD_0396	Q04M42	Aspartyl/glutamyl-tRNA(Asn/Gln) amidotransferase subunit B	gatB	191	GatB	Protein synthesis	tRNA aminoacylation	Cytoplasmic	480
gi|116077025	SPD_0397	Q04M41	Glutamyl-tRNA(Gln) amidotransferase subunit A	gatA	191	GatA	Protein synthesis	tRNA aminoacylation	Cytoplasmic	488
gi|116076421	SPD_0398	Q04M40	Aspartyl/glutamyl-tRNA(Asn/Gln) amidotransferase subunit C	gatC	191	GatC	Protein synthesis	tRNA aminoacylation	Unknown	100
gi|116077520	SPD_0399	Q04M39	Peptide chain release factor 3	prfC	192	PrfC	Protein synthesis	Translation factors	Cytoplasmic	514
gi|116076164	SPD_0400	A0A0H2ZMZ5	Glycosyl transferase family protein 8, putative	gspA_5	193	GspA_5	Glycan biosynthesis and metabolism	Peptidoglycan biosynthesis	Cytoplasmic	161
gi|116076423	SPD_0401	Q04M37	50S ribosomal protein L28	rpmB	194	RpmB	Protein synthesis	Ribosomal proteins	Cytoplasmic	62
gi|116076674	SPD_0402	A0A0H2ZN02	Uncharacterized protein	asp	195	Asp	Unknown function	Unknown function	Membrane	121
gi|116077568	SPD_0403	A0A0H2ZQS9	Uncharacterized protein	prfC	195	PrfC	Carbohydrate metabolism	Carbohydrate metabolism - Other	Unknown	555
gi|116076933	SPD_0404	A0A0H2ZP39	Acetolactate synthase	ilvB	196	IlvB	Amino acid metabolism	Valine, leucine and isoleucine biosynthesis	Cytoplasmic	566
gi|116076247	SPD_0405	A0A0H2ZMX9	Acetolactate synthase, small subunit	ilvH	196	IlvH	Amino acid metabolism	Valine, leucine and isoleucine biosynthesis	Membrane	158
gi|116077731	SPD_0406	Q04M32	Ketol-acid reductoisomerase	ilvC	196	IlvC	Amino acid metabolism	Valine, leucine and isoleucine biosynthesis	Cytoplasmic	340
gi|116076397	SPD_0407	A0A0H2ZMC1	Uncharacterized protein	SPD_0407	197	SPD_0407	Unknown function	Unknown function	Unknown	88
gi|116075985	SPD_0408	A0A0H2ZMK2	Uncharacterized protein	SPD_0408	198	SPD_0408	Unknown function	Unknown function	Cytoplasmic	118
gi|116077075	SPD_0409	A0A0H2ZPH6	Threonine dehydratase	ilvA	198	IlvA	Amino acid metabolism	Valine, leucine and isoleucine biosynthesis	Cytoplasmic	416
gi|116076169	SPD_0410	A0A0H2ZN01	Uncharacterized protein	SPD_0410	199	SPD_0410	Unknown function	Unknown function	Unknown	71
gi|116077249	SPD_0411	A0A0H2ZQG0	Amino acid ABC transporter, ATP-binding protein	lysY	200	LysY	Transport and binding proteins	Amino acids, peptides and amines	Membrane	246
gi|116076789	SPD_0412	A0A0H2ZNS9	Amino acid ABC transporter, amino acid-binding protein/permease protein	lysX1	200	LysX1	Transport and binding proteins	Amino acids, peptides and amines	Membrane	521
gi|116077631	SPD_0413	A0A0H2ZQ36	Uncharacterized protein	SPD_0413	201	SPD_0413	Unknown function	Unknown function	Unknown	53
gi|116077106	SPD_0414	A0A0H2ZNN9	Membrane protein, putative	SPD_0414	202	SPD_0414	Unknown function	Unknown function	Membrane	629
gi|116076212	SPD_0417	Q04M23	Undecaprenyl-diphosphatase	bacA	205	BacA	Glycan biosynthesis and metabolism	Peptidoglycan biosynthesis	Membrane	281
gi|116077039	SPD_0418	A0A0H2ZNT5	Uncharacterized protein	SPD_0418	205	SPD_0418	Unknown function	Unknown function	Unknown	42
gi|116076668	SPD_0419	Q04M21	DNA polymerase IV	dinP	206	DinP	DNA metabolism	DNA replication, recombination and repair	Cytoplasmic	353
gi|116077764	SPD_0420	A0A0H2ZQE4	Formate acetyltransferase	pflB	207	PflB	Carbohydrate metabolism	Pyruvate metabolism	Cytoplasmic	774
gi|116076776	SPD_0421	A0A0H2ZMV9	Uncharacterized protein	SPD_0421	208	SPD_0421	Unknown function	Unknown function	Unknown	115
gi|116076089	SPD_0422	A0A0H2ZLS5	Uncharacterized protein	SPD_0422	209	SPD_0422	Unknown function	Unknown function	Cytoplasmic	94
gi|116077582	SPD_0423	A0A0H2ZQ06	ROK family protein	SPD_0423	210	SPD_0423	Transcription	Transcription factor	Unknown	407
gi|116076538	SPD_0424	A0A0H2ZNL4	Permease IIC component	celB	211	CelB	Transport and binding proteins	Carbohydrates, organic alcohols and acids	Membrane	440
gi|116076387	SPD_0425	A0A0H2ZN87	Uncharacterized protein	SPD_0425	211	SPD_0425	Unknown function	Unknown function	Cytoplasmic	628
gi|116077478	SPD_0426	A0A0H2ZPS5	PTS system, lactose-specific IIA component	lacF-1	212	LacF-1	Transport and binding proteins	Carbohydrates, organic alcohols and acids	Cytoplasmic	114
gi|116077058	SPD_0427	A0A0H2ZNU6	6-phospho-beta-galactosidase	lacG-1	212	LacG-1	Carbohydrate metabolism	Galactose metabolism	Cytoplasmic	470
gi|116076199	SPD_0428	A0A0H2ZMC5	PTS system, lactose-specific IIBC components	lacE-1	212	LacE-1	Transport and binding proteins	Carbohydrates, organic alcohols and acids	Membrane	559
gi|116077695	SPD_0429	A0A0H2ZRQ3	Potassium uptake protein, Trk family protein	trkH_2	213	TrkH_2	Transport and binding proteins	Cations and iron carrying compounds	Membrane	479
gi|116075892	SPD_0430	A0A0H2ZLN5	Potassium uptake protein, Trk family protein	trkA_2	213	TrkA_2	Transport and binding proteins	Cations and iron carrying compounds	Membrane	449
gi|116077706	SPD_0431	A0A0H2ZRK5	Uncharacterized protein	SPD_0431	214	SPD_0431	Unknown function	Unknown function	Unknown	282
gi|116076574	SPD_0432	Q04M08	UPF0397 protein SPD	SPD_0432	214	SPD_0432	Unknown function	Unknown function	Membrane	182
gi|116077262	SPD_0433	A0A0H2ZPC7	Uncharacterized protein	SPD_0433	214	SPD_0433	Unknown function	Unknown function	Cytoplasmic	70
gi|116077387	SPD_0434	A0A0H2ZPL1	ABC transporter, ATP-binding protein	ecfA1	215	EcfA1_1	Transport and binding proteins	Other transport and binding proteins	Membrane	560
gi|116077332	SPD_0435	A0A0H2ZQP4	Membrane protein, putative	ecfT	215	EcfT_1	Transport and binding proteins	Other transport and binding proteins	Membrane	276
gi|116075968	SPD_0436	A0A0H2ZLI9	Putative tRNA (cytidine(34)-2'-O)-methyltransferase	cspR	216	CspR	Transcription	RNA processing	Cytoplasmic	167
gi|116076983	SPD_0437	A0A0H2ZPP6	Membrane protein, putative	ribU	217	RibU	Transport and binding proteins	Other transport and binding proteins	Membrane	187
gi|116077622	SPD_0438	A0A0H2ZPY3	PAP2 family protein	bcrC	217	BcrC	Glycan biosynthesis and metabolism	Peptidoglycan biosynthesis	Membrane	216
gi|116077763	SPD_0439	A0A0H2ZRY4	Uncharacterized protein	SPD_0439	218	SPD_0439	Unknown function	Unknown function	Unknown	129
gi|116076446	SPD_0440	A0A0H2ZNK3	Uncharacterized protein	SPD_0440	219	SPD_0440	Unknown function	Unknown function	Cytoplasmic	149
gi|116077242	SPD_0441	Q04LZ9	Probable DNA-directed RNA polymerase subunit delta	rpoE	220	RpoE	Transcription	RNA polymerase	Cytoplasmic	195
gi|116076157	SPD_0442	A0A0H2ZM98	CTP synthase	pyrG	220	PyrG	Nucleotide metabolism	Pyrimidine metabolism	Cytoplasmic	535
gi|116076174	SPD_0443	A0A0H2ZN05	Na/Pi-cotransporter II-related protein	SPD_0443	221	SPD_0443	Transport and binding proteins	Cations and iron carrying compounds	Membrane	543
gi|116077503	SPD_0444	A0A0H2ZR12	Endo-beta-N-acetylglucosaminidase, putative	SPD_0444	222	SPD_0444	Glycan biosynthesis and metabolism	Glycan biosynthesis and metabolism - Other	Cellwall	1635
gi|116077161	SPD_0445	Q04LZ5	Phosphoglycerate kinase	pgk	223	Pgk	Carbohydrate metabolism	Glycolysis / Gluconeogenesis	Cytoplasmic	398
gi|116076065	SPD_0446	A0A0H2ZM40	Membrane protein, putative	SPD_0446	224	SPD_0446	Unknown function	Unknown function	Membrane	175
gi|116077735	SPD_0447	A0A0H2ZRB1	Transcriptional regulator, MerR family protein	glnR	225	GlnR	Transcription	Transcription factor	Cytoplasmic	118
gi|116076666	SPD_0448	A0A0H2ZNI4	Glutamine synthetase, type I	glnA	225	GlnA	Amino acid metabolism	Alanine, aspartate and glutamate metabolism	Cytoplasmic	448
gi|116076698	SPD_0449	A0A0H2ZMQ3	Uncharacterized protein	SPD_0449	226	SPD_0449	Unknown function	Unknown function	Cytoplasmic	45
gi|116077530	SPD_0450	A0A0H2ZR38	Type I restriction-modification system, S subunit, putative	SPD_0450	228	SPD_0450	DNA metabolism	DNA modification	Unknown	199
gi|116076456	SPD_0451	A0A0H2ZMF4	Type I restriction-modification system, S subunit, putative	SPD_0451	227	SPD_0451	DNA metabolism	DNA modification	Unknown	426
gi|116076337	SPD_0452	A0A0H2ZLW9	Integrase/recombinase, phage integrase family protein	xerD	228	XerD	DNA metabolism	DNA replication, recombination and repair	Cytoplasmic	265
gi|116076099	SPD_0453	A0A0H2ZM63	Type I restriction-modification system, S subunit	hsdS	228	HsdS	DNA metabolism	DNA modification	Cytoplasmic	522
gi|116077130	SPD_0454	A0A0H2ZNQ8	Type I restriction-modification system, M subunit	hsdM	228	HsdM	DNA metabolism	DNA modification	Cytoplasmic	487
gi|116076222	SPD_0455	A0A0H2ZM06	Type I restriction-modification system, R subunit	hsdR	228	HsdR	DNA metabolism	DNA modification	Cytoplasmic	777
gi|116077490	SPD_0456	A0A0H2ZPT4	Uncharacterized protein	SPD_0456	229	SPD_0456	Unknown function	Unknown function	Membrane	66
gi|116076001	SPD_0457	A0A0H2ZML5	Uncharacterized protein	SPD_0457	229	SPD_0457	Unknown function	Unknown function	Membrane	169
gi|116077314	SPD_0458	Q04LY2	Heat-inducible transcription repressor HrcA	hrcA	230	HrcA	Regulatory functions	DNA interactions	Unknown	344
gi|116077645	SPD_0459	Q04LY1	Protein GrpE	grpE	230	GrpE	Protein fate	Protein folding and stabilization	Cytoplasmic	174
gi|116077074	SPD_0460	Q04LY0	Chaperone protein DnaK	dnaK	231	DnaK	Protein fate	Protein folding and stabilization	Cytoplasmic	607
gi|116077405	SPD_0461	A0A0H2ZPF6	Chaperone protein DnaJ	dnaJ	232	DnaJ	Protein fate	Protein folding and stabilization	Cytoplasmic	372
gi|116076813	SPD_0462	A0A0H2ZP80	Uncharacterized protein	SPD_0462	233	SPD_0462	Unknown function	Unknown function	Unknown	95
gi|116076953	SPD_0463	A0A0H2ZNA6	Hit-like protein involved in cell-cycle regulation, putative	SPD_0463	233	SPD_0463	Unknown function	Unknown function	Cytoplasmic	136
gi|116076321	SPD_0464	A0A0H2ZMK7	ABC transporter, ATP-binding protein	SPD_0464	234	SPD_0464	Unknown function	Unknown function	Membrane	243
gi|116077152	SPD_0465	A0A0H2ZNU9	ABC transporter, permease protein, putative	SPD_0465	234	SPD_0465	Unknown function	Unknown function	Membrane	349
gi|116076358	SPD_0466	A0A0H2ZND4	Uncharacterized protein	blpT	235	BlpT	Unknown function	Unknown function	Membrane	109
gi|116077180	SPD_0467	A0A0H2ZP79	BlpS protein	blpS	236	BlpS	Regulatory functions	DNA interactions	Cytoplasmic	112
gi|116075906	SPD_0468	A0A0H2ZLB7	Response regulator BlpR	blpR	236	BlpR	Signal transduction	Two-component system	Cytoplasmic	245
gi|116075903	SPD_0469	A0A0H2ZLP4	Histidine kinase BlpH, putative	blpH	236	BlpH	Signal transduction	Two-component system	Membrane	446
gi|116076790	SPD_0470	A0A0H2ZPC9	Peptide pheromone BlpC	blpC	237	BlpC	Signal transduction	Two-component system	Unknown	51
gi|116076878	SPD_0473	A0A0H2ZNZ6	Immunity protein BlpY	blpY	240	BlpY	Unknown function	Unknown function	Membrane	229
gi|116077711	SPD_0474	A0A0H2ZQ60	Uncharacterized protein	blpZ	240	BlpZ	Unknown function	Unknown function	Membrane	77
gi|116076415	SPD_0475	A0A0H2ZM24	CAAX amino terminal protease family protein	SPD_0475	241	SPD_0475	Protein fate	Degradation of proteins, peptides and glycopeptides	Membrane	203
gi|116077510	SPD_0476	A0A0H2ZQL5	Phosphotransferase enzyme family protein	cotS	242	CotS	Unknown function	Unknown function	Cytoplasmic	264
gi|116076198	SPD_0477	Q04LW5	tRNA (guanine-N(7)-)-methyltransferase	trmB	242	TrmB	Protein synthesis	tRNA and rRNA base modification	Unknown	211
gi|116077251	SPD_0478	Q04LW4	Ribosome maturation factor RimP	rimP	243	RimP	Protein synthesis	Ribosomal proteins	Cytoplasmic	159
gi|116075940	SPD_0479	A0A0H2ZL13	Transcription termination factor NusA	nusA	243	NusA	Transcription	Transcription factor	Cytoplasmic	378
gi|116076880	SPD_0480	A0A0H2ZNG1	Uncharacterized protein	ylxR	243	YlxR	Unknown function	Unknown function	Cytoplasmic	97
gi|116076298	SPD_0481	A0A0H2ZLU6	Ribosomal protein L7A family protein	SPD_0481	243	SPD_0481	Protein synthesis	Ribosomal proteins	Membrane	99
gi|116077164	SPD_0482	Q04LW0	Translation initiation factor IF-2	infB	243	InfB	Protein synthesis	Translation factors	Cytoplasmic	930
gi|116076331	SPD_0483	Q04LV9	Ribosome-binding factor A	rbfA	243	RbfA	Transcription	RNA processing	Cytoplasmic	116
gi|116076981	SPD_0484	A0A0H2ZNN8	Uncharacterized protein	SPD_0484	244	SPD_0484	Unknown function	Unknown function	Membrane	271
gi|116076079	SPD_0485	A0A0H2ZLE3	Uncharacterized protein	SPD_0485	244	SPD_0485	Unknown function	Unknown function	Membrane	60
gi|116076418	SPD_0486	A0A0H2ZNI2	Uncharacterized protein	SPD_0486	244	SPD_0486	Unknown function	Unknown function	Membrane	46
gi|116077786	SPD_0487	A0A0H2ZRJ1	Uncharacterized protein	SPD_0487	245	SPD_0487	Unknown function	Unknown function	Cytoplasmic	81
gi|116076150	SPD_0488	A0A0H2ZMR0	Uncharacterized protein	SPD_0488	246	SPD_0488	Unknown function	Unknown function	Cytoplasmic	444
gi|116077536	SPD_0489	A0A0H2ZR45	Uncharacterized protein	SPD_0489	246	SPD_0489	Unknown function	Unknown function	Cytoplasmic	84
gi|116076316	SPD_0490	A0A0H2ZMK3	Uncharacterized protein	SPD_0490	247	SPD_0490	DNA metabolism	DNA replication, recombination and repair	Unknown	131
gi|116077454	SPD_0491	A0A0H2ZPK0	Uncharacterized protein	SPD_0491	248	SPD_0491	Unknown function	Unknown function	Cytoplasmic	149
gi|116077737	SPD_0492	A0A0H2ZQ99	Acetyltransferase, GNAT family protein	SPD_0492	248	SPD_0492	Unknown function	Unknown function	Cytoplasmic	185
gi|116076289	SPD_0493	A0A0H2ZMI2	Uncharacterized protein	SPD_0493	249	SPD_0493	Unknown function	Unknown function	Cytoplasmic	320
gi|116076918	SPD_0494	A0A0H2ZN81	Valine--tRNA ligase	valS	250	ValS	Protein synthesis	tRNA aminoacylation	Cytoplasmic	883
gi|116077432	SPD_0495	A0A0H2ZQZ0	Uncharacterized protein	SPD_0495	251	SPD_0495	Unknown function	Unknown function	Cytoplasmic	251
gi|116076589	SPD_0496	A0A0H2ZNS3	Cell filamentation protein Fic-related protein	SPD_0496	252	SPD_0496	Cellular processes	Cell division	Cytoplasmic	267
gi|116076977	SPD_0499	A0A0H2ZNC8	Uncharacterized protein	SPD_0499	255	SPD_0499	Unknown function	Unknown function	Unknown	70
gi|116077381	SPD_0501	A0A0H2ZPK8	Transcription antiterminator Lict	licT	257	LicT	Transcription	Transcription factor	Cytoplasmic	279
gi|116076195	SPD_0502	A0A0H2ZLM4	PTS system, beta-glucosides-specific IIABC components	bglF	257	BglF	Transport and binding proteins	Carbohydrates, organic alcohols and acids	Membrane	612
gi|116076540	SPD_0503	A0A0H2ZN61	6-phospho-beta-glucosidase	bglA-2	257	BglA-2	Carbohydrate metabolism	Glycolysis / Gluconeogenesis	Cytoplasmic	471
gi|116077438	SPD_0504	Q04LU1	Phenylalanine--tRNA ligase alpha subunit	pheS	258	PheS	Protein synthesis	tRNA aminoacylation	Cytoplasmic	348
gi|116076800	SPD_0505	A0A0H2ZP71	Acetyltransferase, GNAT family protein	paiA	258	PaiA	Unknown function	Unknown function	Cytoplasmic	169
gi|116077680	SPD_0506	A0A0H2ZRI4	Phenylalanine--tRNA ligase beta subunit	pheT	258	PheT	Protein synthesis	tRNA aminoacylation	Cytoplasmic	800
gi|116076567	SPD_0507	A0A0H2ZMS7	Uncharacterized protein	SPD_0507	259	SPD_0507	Unknown function	Unknown function	Membrane	333
gi|116076428	SPD_0509	A0A0H2ZM33	Uncharacterized protein	SPD_0509	261	SPD_0509	Unknown function	Unknown function	Cytoplasmic	88
gi|116077566	SPD_0510	Q04LT6	5-methyltetrahydropteroyltriglutamate--homocysteine methyltransferase	metE	262	MetE	Amino acid metabolism	Cysteine and methionine metabolism	Cytoplasmic	749
gi|116077169	SPD_0511	A0A0H2ZP69	Methylenetetrahydrofolate reductase	metF	262	MetF	Metabolism of cofactors and vitamins	One carbon pool by folate	Cytoplasmic	288
gi|187611312	SPD_0512	Q04LT4	Polyribonucleotide nucleotidyltransferase	pnp	263	Pnp	Transcription	Degradation of RNA	Cytoplasmic	737
gi|116077049	SPD_0513	A0A0H2ZPF0	Serine acetyltransferase	cysE	263	CysE	Amino acid metabolism	Cysteine and methionine metabolism	Cytoplasmic	205
gi|116076032	SPD_0514	A0A0H2ZMN8	Acetyltransferase, GNAT family protein	SPD_0514	263	SPD_0514	Unknown function	Unknown function	Cytoplasmic	294
gi|116077765	SPD_0515	A0A0H2ZQD1	Cysteine--tRNA ligase	cysS	263	CysS	Protein synthesis	tRNA aminoacylation	Cytoplasmic	447
gi|116075947	SPD_0516	A0A0H2ZMB1	Mini-ribonuclease 3	mrnC	263	MrnC	Protein synthesis	tRNA and rRNA base modification	Cytoplasmic	128
gi|116077156	SPD_0517	A0A0H2ZP61	Uncharacterized protein	SPD_0517	263	SPD_0517	Unknown function	Unknown function	Cytoplasmic	294
gi|116075930	SPD_0518	A0A0H2ZMC8	Uncharacterized protein	SPD_0518	264	SPD_0518	Unknown function	Unknown function	Unknown	151
gi|116076750	SPD_0519	A0A0H2ZP33	Uncharacterized protein	SPD_0519	264	SPD_0519	Unknown function	Unknown function	Extracellular	48
gi|116517009	SPD_0520	Q04LS6	Transposase, putative, truncation	SPD_0520	265	SPD_0520	Unknown function	Unknown function
gi|116076420	SPD_0521	A0A0H2ZM28	ABC transporter, transmembrane protein Vexp1	vex1	266	Vex1	Transport and binding proteins	Amino acids, peptides and amines	Membrane	425
gi|116077238	SPD_0522	A0A0H2ZPB1	ABC transporter, ATP-binding protein Vexp2	vex2	266	Vex2	Transport and binding proteins	Amino acids, peptides and amines	Membrane	215
gi|116076205	SPD_0523	A0A0H2ZLM9	ABC transporter, transmembrane protein Vexp3	vex3	266	Vex3	Transport and binding proteins	Amino acids, peptides and amines	Membrane	459
gi|116077090	SPD_0524	A0A0H2ZPY6	DNA-binding response regulator VncR	vncR	267	VncR	Transcription	Transcription factor	Cytoplasmic	218
gi|116075919	SPD_0525	A0A0H2ZKZ7	Sensor histidine kinase VncS	vncS	267	VncS	Signal transduction	Two-component system	Cytoplasmic	442
gi|116076436	SPD_0526	A0A0H2ZNC5	Fructose-1,6-bisphosphate aldolase, class II	fba	268	Fba	Carbohydrate metabolism	Glycolysis / Gluconeogenesis	Cytoplasmic	293
gi|116076262	SPD_0527	A0A0H2ZM38	Oxidoreductase, putative	SPD_0527	269	SPD_0527	Unknown function	Unknown function	Membrane	396
gi|116076895	SPD_0528	A0A0H2ZP10	Amino acid ABC transporter, permease protein	SPD_0528	270	SPD_0528	Transport and binding proteins	Amino acids, peptides and amines	Membrane	219
gi|116076045	SPD_0529	A0A0H2ZMP7	Amino acid ABC transporter, permease protein	SPD_0529	270	SPD_0529	Transport and binding proteins	Amino acids, peptides and amines	Membrane	225
gi|116077096	SPD_0530	A0A0H2ZPK1	Amino acid ABC transporter, amino acid-binding protein	SPD_0530	270	SPD_0530	Transport and binding proteins	Amino acids, peptides and amines	Unknown	264
gi|116077719	SPD_0532	A0A0H2ZRL7	Single-stranded-DNA-specific exonuclease RecJ	recJ	272	RecJ	DNA metabolism	DNA replication, recombination and repair	Cytoplasmic	740
gi|116076660	SPD_0533	A0A0H2ZNV7	Metallo-beta-lactamase superfamily protein	rnj	273	Rnj	Transcription	Degradation of RNA	Cytoplasmic	553
gi|116077016	SPD_0534	A0A0H2ZPC1	Tributyrin esterase	estA	274	EstA	Unknown function	Unknown function	Unknown	259
gi|116075894	SPD_0535	A0A0H2ZLA6	Serine/alanine-adding enzyme MurM	murM	275	MurM	Glycan biosynthesis and metabolism	Peptidoglycan biosynthesis	Cytoplasmic	406
gi|116075887	SPD_0536	A0A0H2ZM89	Beta-lactam resistance factor	fibB	275	FibB	Glycan biosynthesis and metabolism	Peptidoglycan biosynthesis	Cytoplasmic	410
gi|116076931	SPD_0537	A0A0H2ZN89	Matrixin family protein	SPD_0537	276	SPD_0537	Unknown function	Unknown function	Unknown	219
gi|116076007	SPD_0538	Q04LQ9	UvrABC system protein C	uvrC	276	UvrC	DNA metabolism	DNA replication, recombination and repair	Cytoplasmic	614
gi|116076644	SPD_0539	A0A0H2ZNG4	Ser/Thr protein phosphatase family protein	SPD_0539	276	SPD_0539	Unknown function	Unknown function	Cytoplasmic	277
gi|116077707	SPD_0540	A0A0H2ZR83	Amino acid ABC transporter, amino acid-binding protein, putative	tcyJ	277	TcyJ	Transport and binding proteins	Amino acids, peptides and amines	Unknown	266
gi|116077509	SPD_0541	A0A0H2ZR18	Nitroreductase family protein	SPD_0541	278	SPD_0541	Unknown function	Unknown function	Cytoplasmic	201
gi|116076357	SPD_0542	A0A0H2ZMN4	Dipeptidase PepV	pepV	278	PepV	Protein fate	Degradation of proteins, peptides and glycopeptides	Cytoplasmic	466
gi|116077601	SPD_0543	A0A0H2ZRG4	Uncharacterized protein	SPD_0543	278	SPD_0543	Unknown function	Unknown function	Cytoplasmic	192
gi|116076531	SPD_0544	A0A0H2ZMM2	Uncharacterized protein	SPD_0544	279	SPD_0544	Unknown function	Unknown function	Cytoplasmic	50
gi|116076084	SPD_0545	A0A0H2ZLE7	Uncharacterized protein	SPD_0545	279	SPD_0545	Unknown function	Unknown function	Unknown	44
gi|116077431	SPD_0546	A0A0H2ZQD0	Branched-chain amino acid transport system II carrier protein	brnQ	280	BrnQ	Transport and binding proteins	Amino acids, peptides and amines	Membrane	441
gi|116076969	SPD_0547	A0A0H2ZNC3	Uncharacterized protein	SPD_0547	281	SPD_0547	Unknown function	Unknown function	Cytoplasmic	345
gi|116076133	SPD_0548	A0A0H2ZM85	HIT family protein	SPD_0548	281	SPD_0548	Unknown function	Unknown function	Cytoplasmic	167
gi|116077146	SPD_0549	A0A0H2ZP28	Lipoprotein, putative	vanY	281	VanY	Cellular processes	Toxin production and resistance	Unknown	238
gi|116076292	SPD_0550	Q04LP7	50S ribosomal protein L11	rplK	282	RplK	Protein synthesis	Ribosomal proteins	Cytoplasmic	141
gi|116076280	SPD_0551	Q04LP6	50S ribosomal protein L1	rplA	282	RplA	Protein synthesis	Ribosomal proteins	Cytoplasmic	229
gi|116076412	SPD_0552	A0A0H2ZMU2	Uncharacterized protein	SPD_0552	283	SPD_0552	Unknown function	Unknown function	Extracellular	195
gi|116077570	SPD_0553	A0A0H2ZQ00	Uncharacterized protein	SPD_0553	284	SPD_0553	Protein fate	Protein and peptide secretion and trafficking	Unknown	109
gi|116076613	SPD_0554	A0A0H2ZNT7	ABC transporter, ATP-binding protein	SPD_0554	285	SPD_0554	Transport and binding proteins	Unknown substrate	Membrane	330
gi|116076840	SPD_0555	A0A0H2ZN14	Membrane protein, putative	SPD_0555	285	SPD_0555	Transport and binding proteins	Other transport and binding proteins	Membrane	272
gi|116077482	SPD_0556	A0A0H2ZQI2	Membrane protein, putative	SPD_0556	285	SPD_0556	Transport and binding proteins	Other transport and binding proteins	Membrane	261
gi|116077548	SPD_0558	A0A0H2ZRA8	Cell wall-associated serine protease PrtA	prtA	287	PrtA	Glycan biosynthesis and metabolism	Glycan biosynthesis and metabolism - Other	Cellwall	2144
gi|116076721	SPD_0559	A0A0H2ZP11	PTS system IIA component, putative	gatA	288	GatA	Transport and binding proteins	Carbohydrates, organic alcohols and acids	Cytoplasmic	158
gi|116076724	SPD_0560	A0A0H2ZN45	PTS system, IIB component, putative	gatB	288	GatB	Transport and binding proteins	Carbohydrates, organic alcohols and acids	Cytoplasmic	101
gi|116077760	SPD_0561	A0A0H2ZQC7	PTS system, IIC component, putative	gatC	288	GatC	Transport and binding proteins	Carbohydrates, organic alcohols and acids	Membrane	491
gi|116076048	SPD_0562	A0A0H2ZMI1	Beta-galactosidase, putative	bgaA	289	BgaA	Glycan biosynthesis and metabolism	Glycan degradation	Cellwall	2228
gi|116076893	SPD_0564	A0A0H2ZN60	Uncharacterized protein	SPD_0564	291	SPD_0564	Unknown function	Unknown function	Membrane	117
gi|116076096	SPD_0565	A0A0H2ZLS9	Uncharacterized protein	SPD_0565	292	SPD_0565	Unknown function	Unknown function	Unknown	150
gi|116077625	SPD_0566	A0A0H2ZRI3	Uncharacterized protein	SPD_0566	292	SPD_0566	Unknown function	Unknown function	Cytoplasmic	148
gi|116076828	SPD_0567	A0A0H2ZNB7	rRNA methylase, putative	SPD_0567	292	SPD_0567	Unknown function	Unknown function	Cytoplasmic	187
gi|116076845	SPD_0568	A0A0H2ZND0	Uncharacterized protein	SPD_0568	292	SPD_0568	Unknown function	Unknown function	Cytoplasmic	84
gi|116077412	SPD_0569	A0A0H2ZPG1	Sodium/hydrogen exchanger family protein	SPD_0569	292	SPD_0569	Transport and binding proteins	Cations and iron carrying compounds	Membrane	684
gi|116077139	SPD_0570	A0A0H2ZQ66	Ribonuclease BN, putative	SPD_0570	293	SPD_0570	Unknown function	Unknown function	Membrane	286
gi|116076283	SPD_0571	A0A0H2ZMH7	Cytochrome c-type biogenesis protein CcdA	ccdA-1	294	CcdA-1	Energy metabolism	Electron transport	Membrane	236
gi|116077640	SPD_0572	A0A0H2ZR14	Thioredoxin family protein	SPD_0572	294	SPD_0572	Unknown function	Unknown function	Cellwall	188
gi|116076176	SPD_0573	A0A0H2ZLK9	Peptide methionine sulfoxide reductase msrA/msrB 2	msrAB2	294	MsrAB2	Cellular processes	Adaptations to atypical conditions	Cytoplasmic	311
gi|116076966	SPD_0574	A0A0H2ZP70	DNA-binding response regulator	SPD_0574	295	SPD_0574	Transcription	Transcription factor	Cytoplasmic	245
gi|116076042	SPD_0575	A0A0H2ZLB2	Sensor histidine kinase, putative	yesM	295	YesM	Signal transduction	Two-component system	Membrane	563
gi|116077203	SPD_0576	Q04LM3	UPF0340 protein SPD	SPD_0576	296	SPD_0576	Unknown function	Unknown function	Cytoplasmic	187
gi|116076356	SPD_0577	A0A0H2ZN64	Zinc metalloprotease ZmpB	zmpB	296	ZmpB	Glycan biosynthesis and metabolism	Glycan biosynthesis and metabolism - Other	Cellwall	1876
gi|116077379	SPD_0578	A0A0H2ZQ98	Para-aminobenzoate synthase, component I	pabB	297	PabB	Metabolism of cofactors and vitamins	Folate biosynthesis	Cytoplasmic	573
gi|116077202	SPD_0579	A0A0H2ZNY8	Pneumococcal surface protein, putative	SPD_0579	297	SPD_0579	Unknown function	Unknown function	Unknown	329
gi|116077604	SPD_0580	A0A0H2ZPW6	Glucokinase	gki	297	Gki	Carbohydrate metabolism	Glycolysis / Gluconeogenesis	Cytoplasmic	319
gi|116076769	SPD_0581	Q04LL8	Thymidylate synthase	thyA	297	ThyA	Nucleotide metabolism	Pyrimidine metabolism	Cytoplasmic	279
gi|116076634	SPD_0582	A0A0H2ZMX2	Uncharacterized protein	SPD_0582	298	SPD_0582	Unknown function	Unknown function	Membrane	56
gi|116075929	SPD_0583	Q04LL6	tRNA dimethylallyltransferase	miaA	299	MiaA	Protein synthesis	tRNA and rRNA base modification	Cytoplasmic	294
gi|116077652	SPD_0584	A0A0H2ZQ13	GTPase HflX	hflX	299	HflX	Unknown function	General	Cytoplasmic	412
gi|116077430	SPD_0585	A0A0H2ZQT8	Uncharacterized protein	SPD_0585	299	SPD_0585	Unknown function	Unknown function	Cytoplasmic	207
gi|116077275	SPD_0586	Q04LL3	Ribonuclease Z	rnz	299	Rnz	Transcription	RNA processing	Cytoplasmic	309
gi|116076556	SPD_0587	A0A0H2ZMR8	Oxidoreductase, short chain dehydrogenase/reductase family protein	SPD_0587	299	SPD_0587	Unknown function	Unknown function	Cytoplasmic	251
gi|116077672	SPD_0588	A0A0H2ZQ29	Transcriptional regulator, putative	cpsY	300	CpsY	Transcription	Transcription factor	Cytoplasmic	322
gi|116077002	SPD_0589	A0A0H2ZNQ4	Uncharacterized protein	yqgQ	301	YqgQ	Unknown function	Unknown function	Cytoplasmic	89
gi|116076103	SPD_0590	A0A0H2ZLF6	Rhodanese-like domain	moeZ	301	MoeZ	Unknown function	Unknown function	Membrane	126
gi|116077627	SPD_0591	A0A0H2ZPZ0	Uncharacterized protein	SPD_0591	302	SPD_0591	Unknown function	Unknown function	Membrane	65
gi|116076802	SPD_0592	A0A0H2ZPE0	Pseudouridine synthase	rsuA-2	303	RsuA-2	Protein synthesis	tRNA and rRNA base modification	Cytoplasmic	241
gi|116077143	SPD_0593	A0A0H2ZQ39	Elongation factor Tu family protein	SPD_0593	304	SPD_0593	Protein synthesis	Translation factors	Membrane	613
gi|116076051	SPD_0594	A0A0H2ZLP7	Uncharacterized protein	SPD_0594	304	SPD_0594	Unknown function	Unknown function	Membrane	84
gi|116076882	SPD_0595	A0A0H2ZPE8	Uncharacterized protein	SPD_0595	305	SPD_0595	Cellular processes	Toxin production and resistance	Extracellular	115
gi|116076006	SPD_0596	A0A0H2ZMM0	Membrane protein, putative	SPD_0596	306	SPD_0596	Cellular processes	Toxin production and resistance	Membrane	673
gi|116077114	SPD_0597	A0A0H2ZQ50	ABC transporter, ATP-binding protein	SPD_0597	306	SPD_0597	Transport and binding proteins	Unknown substrate	Membrane	213
gi|116076338	SPD_0598	Q04LK1	UDP-N-acetylmuramoylalanine--D-glutamate ligase	murD	306	MurD	Glycan biosynthesis and metabolism	Peptidoglycan biosynthesis	Cytoplasmic	450
gi|116076547	SPD_0599	Q04LK0	UDP-N-acetylglucosamine--N-acetylmuramyl-(pentapeptide) pyrophosphoryl-undecaprenol N-acetylglucosamine transferase	murG	306	MurG	Glycan biosynthesis and metabolism	Peptidoglycan biosynthesis	Membrane	352
gi|116077617	SPD_0600	A0A0H2ZRE3	Cell division protein DivIB	divIB	306	DivIB	Cellular processes	Cell division	Cellwall	396
gi|116076922	SPD_0601	A0A0H2ZPM7	Uncharacterized protein	SPD_0601	307	SPD_0601	Unknown function	Unknown function	Membrane	41
gi|116076131	SPD_0602	A0A0H2ZLH4	Uncharacterized protein	SPD_0602	307	SPD_0602	Unknown function	Unknown function	Membrane	43
gi|116077696	SPD_0603	A0A0H2ZQ72	Peptidase, M50 family protein	SPD_0603	308	SPD_0603	Unknown function	Unknown function	Membrane	265
gi|116076628	SPD_0604	A0A0H2ZNU2	HesA/MoeB/ThiF family protein	SPD_0604	309	SPD_0604	Metabolism of cofactors and vitamins	Metabolism of cofactors and vitamins - Other	Membrane	337
gi|116076417	SPD_0606	A0A0H2ZMU6	Membrane protein, putative	SPD_0606	311	SPD_0606	Unknown function	Unknown function	Membrane	237
gi|116076925	SPD_0608	Q04LJ3	Orotidine 5'-phosphate decarboxylase	pyrF	313	PyrF	Nucleotide metabolism	Pyrimidine metabolism	Cytoplasmic	233
gi|116076110	SPD_0609	Q04LJ2	Orotate phosphoribosyltransferase	pyrE	313	PyrE	Nucleotide metabolism	Pyrimidine metabolism	Cytoplasmic	210
gi|116076640	SPD_0610	A0A0H2ZP19	Uncharacterized protein	SPD_0610	314	SPD_0610	Unknown function	Unknown function	Unknown	134
gi|116077797	SPD_0611	A0A0H2ZRK1	Membrane protein, putative	SPD_0611	315	SPD_0611	Unknown function	Unknown function	Membrane	254
gi|116077600	SPD_0612	A0A0H2ZQW3	Lipoprotein, putative	SPD_0612	315	SPD_0612	Unknown function	Unknown function	Membrane	250
gi|116076530	SPD_0613	A0A0H2ZNS2	Membrane protein, putative	SPD_0613	315	SPD_0613	Unknown function	Unknown function	Membrane	234
gi|116076960	SPD_0614	A0A0H2ZPM4	ABC transporter, ATP-binding protein	cysA	315	CysA	Unknown function	Unknown function	Membrane	215
gi|116075928	SPD_0616	A0A0H2ZLR6	Amino acid ABC transporter, ATP-binding protein	glnQ_5	317	GlnQ_5	Transport and binding proteins	Amino acids, peptides and amines	Membrane	252
gi|116076591	SPD_0617	A0A0H2ZNY9	Amino acid ABC transporter, permease protein	SPD_0617	317	SPD_0617	Transport and binding proteins	Amino acids, peptides and amines	Membrane	225
gi|116077192	SPD_0618	A0A0H2ZQC0	Amino acid ABC transporter, permease protein	SPD_0618	317	SPD_0618	Transport and binding proteins	Amino acids, peptides and amines	Membrane	226
gi|116076381	SPD_0619	A0A0H2ZN83	Uncharacterized protein	SPD_0619	318	SPD_0619	Unknown function	Unknown function	Unknown	48
gi|116077666	SPD_0620	Q04LI2	Lysine--tRNA ligase	lysS	319	LysS	Protein synthesis	tRNA aminoacylation	Cytoplasmic	496
gi|116077725	SPD_0621	A0A0H2ZRA5	Lactate oxidase	lctO	320	LctO	Carbohydrate metabolism	Pyruvate metabolism	Cytoplasmic	378
gi|116076881	SPD_0622	A0A0H2ZN50	Aminopyrimidine aminohydrolase	SPD_0622	321	SPD_0622	Metabolism of cofactors and vitamins	Thiamine metabolism	Unknown	222
gi|116076237	SPD_0623	Q04LH9	Hydroxyethylthiazole kinase 1	thiM	321	ThiM	Metabolism of cofactors and vitamins	Thiamine metabolism	Cytoplasmic	260
gi|116077112	SPD_0624	A0A0H2ZQ09	Thiamine-phosphate synthase	thiE-1	321	ThiE-1	Metabolism of cofactors and vitamins	Thiamine metabolism	Cytoplasmic	209
gi|116076655	SPD_0625	A0A0H2ZNH5	Membrane protein, putative	SPD_0625	322	SPD_0625	Transport and binding proteins	Cations and iron carrying compounds	Membrane	186
gi|116077362	SPD_0626	A0A0H2ZQ88	ABC transporter, ATP-binding protein	ecfA1	322	EcfA1_2	Transport and binding proteins	Other transport and binding proteins	Membrane	461
gi|116076905	SPD_0627	A0A0H2ZN70	Membrane protein, putative	ecfT	322	EcfT_2	Transport and binding proteins	Other transport and binding proteins	Membrane	216
gi|116077689	SPD_0628	A0A0H2ZRP7	Transcriptional activator TenA, TENA/THI-4 family protein	tenA	322	TenA	Metabolism of cofactors and vitamins	Thiamine metabolism	Cytoplasmic	230
gi|116077280	SPD_0629	A0A0H2ZQE2	ThiW protein	thiW	322	ThiW	Metabolism of cofactors and vitamins	Thiamine metabolism	Membrane	174
gi|116076230	SPD_0630	Q04LH2	Hydroxyethylthiazole kinase 2	thiM	322	ThiM	Metabolism of cofactors and vitamins	Thiamine metabolism	Membrane	267
gi|116076225	SPD_0631	A0A0H2ZMD7	Thiamine-phosphate synthase	thiE	322	ThiE	Metabolism of cofactors and vitamins	Thiamine metabolism	Cytoplasmic	210
gi|116077129	SPD_0632	A0A0H2ZP09	Phosphomethylpyrimidine kinase	thiD	323	ThiD	Metabolism of cofactors and vitamins	Thiamine metabolism	Cytoplasmic	263
gi|116076052	SPD_0633	A0A0H2ZLC1	Transcriptional regulator, putative	SPD_0633	324	SPD_0633	Regulatory functions	DNA interactions	Unknown	131
gi|116076903	SPD_0634	A0A0H2ZPL4	Uncharacterized protein	SPD_0634	324	SPD_0634	Unknown function	Unknown function	Cytoplasmic	123
gi|116077753	SPD_0635	A0A0H2ZQ91	Cation-transporting ATPase, E1-E2 family protein	SPD_0635	324	SPD_0635	Transport and binding proteins	Cations and iron carrying compounds	Membrane	747
gi|116076695	SPD_0636	A0A0H2ZP58	Pyruvate oxidase	spxB	325	SpxB	Carbohydrate metabolism	Pyruvate metabolism	Membrane	591
gi|116077654	SPD_0637	A0A0H2ZR27	Glyoxalase family protein	SPD_0637	326	SPD_0637	Unknown function	Unknown function	Unknown	115
gi|116076778	SPD_0638	A0A0H2ZNS1	Transposase family protein	SPD_0638	327	SPD_0638	Unknown function	Unknown function	Cytoplasmic	217
gi|116077354	SPD_0639	A0A0H2ZQL4	Uncharacterized protein	SPD_0639	328	SPD_0639	Unknown function	Unknown function	Cytoplasmic	115
gi|116076853	SPD_0641	A0A0H2ZPC2	Mannose-6-phosphate isomerase, class I	manA	330	ManA	Carbohydrate metabolism	Fructose and mannose metabolism	Cytoplasmic	314
gi|116075999	SPD_0642	A0A0H2ZME7	Transporter	SPD_0642	331	SPD_0642	Unknown function	Unknown function	Membrane	461
gi|116076067	SPD_0644	A0A0H2ZLR1	MutT/nudix family protein	mutX_1	333	MutX_1	DNA metabolism	DNA replication, recombination and repair	Cytoplasmic	151
gi|116077457	SPD_0645	A0A0H2ZR16	Uncharacterized protein	SPD_0645	333	SPD_0645	Unknown function	Enzymes of unknown specificity	Unknown	391
gi|116077480	SPD_0646	A0A0H2ZPL7	Uncharacterized protein	SPD_0646	333	SPD_0646	Unknown function	Unknown function	Cytoplasmic	281
gi|116077620	SPD_0647	A0A0H2ZQ31	Transcriptional regulator, TetR family protein	mtrR	334	MtrR	Transcription	Transcription factor	Cytoplasmic	185
gi|116076494	SPD_0648	A0A0H2ZN16	Cytidine and deoxycytidylate deaminase family protein	comEB	334	ComEB	Nucleotide metabolism	Pyrimidine metabolism	Cytoplasmic	155
gi|116075934	SPD_0649	A0A0H2ZM67	Uracil phosphoribosyltransferase	upp	334	Upp	Nucleotide metabolism	Pyrimidine metabolism	Cytoplasmic	216
gi|116076792	SPD_0650	Q04LF4	ATP-dependent Clp protease proteolytic subunit	clpP	335	ClpP	Protein fate	Degradation of proteins, peptides and glycopeptides	Cytoplasmic	196
gi|116077207	SPD_0651	Q04LF3	UPF0298 protein SPD	SPD_0651	336	SPD_0651	Unknown function	Unknown function	Cytoplasmic	82
gi|116076332	SPD_0652	A0A0H2ZLW7	Branched-chain amino acid ABC transporter, amino acid-binding protein	livJ	337	LivJ	Transport and binding proteins	Amino acids, peptides and amines	Unknown	386
gi|116075902	SPD_0653	A0A0H2ZM30	Branched-chain amino acid ABC transporter, permease protein	livH	337	LivH	Transport and binding proteins	Amino acids, peptides and amines	Membrane	289
gi|116077215	SPD_0654	A0A0H2ZPX3	Branched-chain amino acid ABC transporter, permease protein	livM	337	LivM	Transport and binding proteins	Amino acids, peptides and amines	Membrane	318
gi|116076812	SPD_0655	A0A0H2ZMY8	Branched-chain amino acid ABC transporter, ATP-binding protein	livG	337	LivG	Transport and binding proteins	Amino acids, peptides and amines	Membrane	254
gi|116077015	SPD_0656	A0A0H2ZPS6	Branched-chain amino acid ABC transporter, ATP-binding protein	livF	337	LivF	Transport and binding proteins	Amino acids, peptides and amines	Membrane	236
gi|116077442	SPD_0657	A0A0H2ZPI9	Acetoin utilization protein AcuB, putative	SPD_0657	338	SPD_0657	Carbohydrate metabolism	Carbohydrate metabolism - Other	Cytoplasmic	218
gi|116076848	SPD_0658	A0A0H2ZNW9	Peptide chain release factor 2	prfB	339	PrfB	Protein synthesis	Translation factors	Cytoplasmic	329
gi|116076330	SPD_0659	A0A0H2ZM82	Cell division ATP-binding protein FtsE	ftsE	339	FtsE	Cellular processes	Cell division	Membrane	230
gi|116077201	SPD_0660	Q04LE4	Cell division protein FtsX	ftsX	339	FtsX	Cellular processes	Cell division	Membrane	308
gi|116077730	SPD_0661	A0A0H2ZQ94	PTS system, IIABC components	exp5	340	Exp5	Transport and binding proteins	Carbohydrates, organic alcohols and acids	Membrane	726
gi|116076647	SPD_0662	A0A0H2ZML3	Endonuclease/exonuclease/phosphatase family protein	mapP	340	MapP	Carbohydrate metabolism	Starch and sucrose metabolism	Cytoplasmic	271
gi|116077464	SPD_0663	A0A0H2ZPR8	ATP-dependent RNA helicase, DEAD/DEAH box family protein	rheB	341	RheB	Cellular processes	Adaptations to atypical conditions	Cytoplasmic	447
gi|116076143	SPD_0664	Q04LE0	S-adenosylmethionine synthase	metK	342	MetK	Amino acid metabolism	Cysteine and methionine metabolism	Cytoplasmic	396
gi|116077263	SPD_0665	A0A0H2ZP32	Dihydroorotate dehydrogenase	pyrDa	343	PyrDa	Nucleotide metabolism	Pyrimidine metabolism	Cytoplasmic	311
gi|116075910	SPD_0666	A0A0H2ZMB0	DNA polymerase III, delta subunit	holA	343	HolA	DNA metabolism	DNA replication, recombination and repair	Membrane	345
gi|116076123	SPD_0667	A0A0H2ZLU4	Superoxide dismutase	sodA	344	SodA	Energy metabolism	Electron transport	Extracellular	201
gi|116076835	SPD_0668	A0A0H2ZN07	Uncharacterized protein	yutD	345	YutD	Transcription	Transcription factor	Unknown	176
gi|116077443	SPD_0669	Q04LD5	Probable dual-specificity RNA methyltransferase RlmN	SPD_0669	345	SPD_0669	Protein synthesis	tRNA and rRNA base modification	Cytoplasmic	361
gi|116076564	SPD_0670	A0A0H2ZNQ7	Conserved hypothetical, predicted membrane protein	SPD_0670	345	SPD_0670	Unknown function	Unknown function	Membrane	143
gi|116076712	SPD_0671	A0A0H2ZN36	ABC transporter, ATP-binding protein	SPD_0671	345	SPD_0671	Unknown function	Unknown function	Cytoplasmic	513
gi|116077567	SPD_0672	A0A0H2ZR80	Peptidyl-prolyl cis-trans isomerase, cyclophilin-type	SPD_0672	346	SPD_0672	Cellular processes	Toxin production and resistance	Unknown	267
gi|116077449	SPD_0673	A0A0H2ZPJ4	Uncharacterized protein	SPD_0673	347	SPD_0673	Unknown function	Unknown function	Membrane	73
gi|116076605	SPD_0674	Q04LD0	30S ribosomal protein S16	rpsP	348	RpsP	Protein synthesis	Ribosomal proteins	Cytoplasmic	90
gi|116076179	SPD_0675	A0A0H2ZMB4	UPF0109 protein SPD	SPD_0675	348	SPD_0675	Unknown function	Unknown function	Cytoplasmic	79
gi|116077267	SPD_0676	A0A0H2ZPD1	Uncharacterized protein	SPD_0676	349	SPD_0676	Unknown function	Unknown function	Cytoplasmic	142
gi|116076942	SPD_0677	A0A0H2ZN98	Uncharacterized protein	SPD_0677	349	SPD_0677	Unknown function	Unknown function	Cytoplasmic	119
gi|116076825	SPD_0678	Q04LC6	Ribosome maturation factor RimM	rimM	349	RimM	Transcription	RNA processing	Cytoplasmic	172
gi|116077471	SPD_0679	Q04LC5	tRNA (guanine-N(1)-)-methyltransferase	trmD	349	TrmD	Protein synthesis	tRNA and rRNA base modification	Cytoplasmic	239
gi|116076371	SPD_0680	A0A0H2ZMP4	Uncharacterized protein	nrdD_2	349	NrdD_2	Unknown function	Unknown function	Cytoplasmic	112
gi|116077398	SPD_0681	A0A0H2ZPM1	Uncharacterized protein	SPD_0681	350	SPD_0681	Unknown function	Unknown function	Unknown	106
gi|116076860	SPD_0682	A0A0H2ZN28	Uncharacterized protein	SPD_0682	352	SPD_0682	Unknown function	Unknown function	Unknown	48
gi|116077623	SPD_0683	A0A0H2ZRF1	Uncharacterized protein	SPD_0683	351	SPD_0683	Unknown function	Unknown function	Cytoplasmic	71
gi|116076005	SPD_0684	A0A0H2ZLZ7	Biotin synthase (BioY family protein), putative	bioY	352	BioY	Transport and binding proteins	Other transport and binding proteins	Membrane	178
gi|116077292	SPD_0685	A0A0H2ZQK4	Glutathione-disulfide reductase	gor	353	Gor	Metabolism of other amino acids	Glutathione metabolism	Cytoplasmic	448
gi|116076287	SPD_0686	A0A0H2ZLT7	Efflux transporter, RND family protein, MFP subunit	SPD_0686	354	SPD_0686	Transport and binding proteins	Unknown substrate	Unknown	399
gi|116076561	SPD_0687	A0A0H2ZMS1	ABC transporter ATP-binding protein	macB_1	354	MacB_1	Transport and binding proteins	Other transport and binding proteins	Membrane	233
gi|116077461	SPD_0688	A0A0H2ZQW6	Efflux ABC transporter, permease protein	SPD_0688	354	SPD_0688	Unknown function	Unknown function	Membrane	419
gi|116076805	SPD_0689	A0A0H2ZN97	Methionine--tRNA ligase	metG	354	MetG	Protein synthesis	tRNA aminoacylation	Cytoplasmic	665
gi|116077634	SPD_0690	A0A0H2ZR08	Uncharacterized protein	SPD_0690	354	SPD_0690	Unknown function	Unknown function	Unknown	63
gi|116075976	SPD_0691	A0A0H2ZMD3	Transcriptional regulator, PadR family protein	SPD_0691	355	SPD_0691	Unknown function	Unknown function	Cytoplasmic	106
gi|116077288	SPD_0692	A0A0H2ZPE7	Membrane protein, putative	SPD_0692	355	SPD_0692	Unknown function	Unknown function	Membrane	291
gi|116076362	SPD_0693	A0A0H2ZLY3	Oxidoreductase, aldo/keto reductase family protein	SPD_0693	355	SPD_0693	Unknown function	Unknown function	Cytoplasmic	308
gi|116077006	SPD_0694	A0A0H2ZPV1	Uncharacterized protein	SPD_0694	356	SPD_0694	Protein synthesis	tRNA aminoacylation	Cytoplasmic	85
gi|116076119	SPD_0695	A0A0H2ZLG6	Oxidoreductase, short chain dehydrogenase/reductase family protein	fabG	357	FabG	Lipid metabolism	Fatty acid biosynthesis	Cytoplasmic	232
gi|116076733	SPD_0696	A0A0H2ZNP0	MutT/nudix family protein	SPD_0696	357	SPD_0696	Unknown function	Unknown function	Cytoplasmic	159
gi|116077364	SPD_0697	A0A0H2ZPJ3	Acetyltransferase, GNAT family protein	SPD_0697	358	SPD_0697	Unknown function	Unknown function	Cytoplasmic	242
gi|116076495	SPD_0698	A0A0H2ZNP1	Uncharacterized protein	SPD_0698	359	SPD_0698	Unknown function	Unknown function	Cytoplasmic	289
gi|116077221	SPD_0699	A0A0H2ZPX7	Uncharacterized protein	SPD_0699	359	SPD_0699	Unknown function	Unknown function	Cytoplasmic	146
gi|116076186	SPD_0700	A0A0H2ZN13	Aminopeptidase N	pepN	360	PepN	Metabolism of other amino acids	Glutathione metabolism	Cytoplasmic	848
gi|116076041	SPD_0701	A0A0H2ZLN7	DNA-binding response regulator CiaR	ciaR	360	CiaR	Signal transduction	Two-component system	Cytoplasmic	246
gi|116077265	SPD_0702	A0A0H2ZQ10	Sensor histidine kinase CiaH	ciaH	360	CiaH	Signal transduction	Two-component system	Membrane	444
gi|116077794	SPD_0703	A0A0H2ZQF1	Uncharacterized protein	SPD_0703	361	SPD_0703	Unknown function	Unknown function	Membrane	95
gi|116076970	SPD_0704	A0A0H2ZPN6	Uncharacterized protein	spr0710	362	Spr0710	Unknown function	Unknown function	Cytoplasmic	356
gi|116077244	SPD_0705	A0A0H2ZQF3	DnaQ family exonuclease/DinG family helicase, putative	SPD_0705	363	SPD_0705	DNA metabolism	DNA replication, recombination and repair	Cytoplasmic	816
gi|116076152	SPD_0706	A0A0H2ZMY5	Rod shape-determining protein RodA, putative	rodA	363	RodA	Cellular processes	Cell division	Membrane	407
gi|116077529	SPD_0707	A0A0H2ZPQ4	4-methyl-5(B-hydroxyethyl)-thiazole monophosphate biosynthesis protein, putative	SPD_0707	363	SPD_0707	Unknown function	General	Cytoplasmic	184
gi|116076449	SPD_0708	A0A0H2ZM46	Hydrolase, haloacid dehalogenase-like family protein	SPD_0708	363	SPD_0708	Unknown function	Enzymes of unknown specificity	Cytoplasmic	187
gi|116076732	SPD_0709	A0A0H2ZP21	DNA gyrase subunit B	gyrB	363	GyrB	DNA metabolism	DNA replication, recombination and repair	Cytoplasmic	648
gi|116077469	SPD_0710	Q04L94	Septation ring formation regulator EzrA	ezrA	364	EzrA	Cellular processes	Cell division	Cytoplasmic	575
gi|116076184	SPD_0711	A0A0H2ZMB8	Uncharacterized protein	SPD_0711	365	SPD_0711	Unknown function	Unknown function	Cytoplasmic	117
gi|116076990	SPD_0712	A0A0H2ZPT3	Transposase family protein	SPD_0712	365	SPD_0712	Unknown function	Unknown function	Cytoplasmic	169
gi|116076398	SPD_0714	A0A0H2ZM10	Uncharacterized protein	SPD_0714	367	SPD_0714	Unknown function	Unknown function	Cytoplasmic	99
gi|116076240	SPD_0715	A0A0H2ZLQ6	MutT/nudix family protein	SPD_0715	368	SPD_0715	Unknown function	Unknown function	Cytoplasmic	140
gi|116077586	SPD_0716	A0A0H2ZRF4	IS630-Spn1, transposase Orf1	SPD_0716	369	SPD_0716	Unknown function	Unknown function	Unknown	115
gi|116076886	SPD_0717	A0A0H2ZNG6	ATP-dependent Clp protease ATP-binding subunit ClpE	clpE	370	ClpE	Protein fate	Degradation of proteins, peptides and glycopeptides	Cytoplasmic	752
gi|116076109	SPD_0718	A0A0H2ZMN3	Uncharacterized protein	ykuJ	371	YkuJ	Unknown function	Unknown function	Cytoplasmic	76
gi|116077174	SPD_0719	A0A0H2ZQB0	Amino acid ABC transporter, permease protein	SPD_0719	372	SPD_0719	Transport and binding proteins	Amino acids, peptides and amines	Membrane	227
gi|116076310	SPD_0720	A0A0H2ZN99	Amino acid ABC transporter, ATP-binding protein	glnQ	372	GlnQ	Transport and binding proteins	Amino acids, peptides and amines	Membrane	244
gi|158705929	SPD_0721	Q04L84	Bifunctional protein FolD	folD	373	FolD	Metabolism of cofactors and vitamins	One carbon pool by folate	Cytoplasmic	285
gi|116077610	SPD_0722	A0A0H2ZPX2	ADP-dependent (S)-NAD(P)H-hydrate dehydratase	SPD_0722	374	SPD_0722	Metabolism of cofactors and vitamins	Nicotinate and nicotinamide Metabolism	Unknown	290
gi|116077022	SPD_0723	Q04L82	Ribose-5-phosphate isomerase A	rpiA	375	RpiA	Carbohydrate metabolism	Pentose phosphate pathway	Cytoplasmic	227
gi|116076924	SPD_0724	Q04L81	Phosphopentomutase	deoB	375	DeoB	Carbohydrate metabolism	Pentose phosphate pathway	Cytoplasmic	403
gi|116076043	SPD_0726	A0A0H2ZMH6	Purine nucleoside phosphorylase	punA	377	PunA	Nucleotide metabolism	Purine metabolism	Cytoplasmic	269
gi|116076667	SPD_0727	A0A0H2ZP42	Uncharacterized protein	SPD_0727	378	SPD_0727	Unknown function	Unknown function	Cytoplasmic	243
gi|116077771	SPD_0728	A0A0H2ZQD5	Uncharacterized protein	SPD_0728	378	SPD_0728	Unknown function	Unknown function	Unknown	67
gi|116077552	SPD_0729	A0A0H2ZQR4	Hemolysin-related protein	SPD_0729	378	SPD_0729	Cellular processes	Pathogenesis	Extracellular	170
gi|116076197	SPD_0730	Q04L76	Purine nucleoside phosphorylase DeoD-type	deoD	379	DeoD	Nucleotide metabolism	Purine metabolism	Cytoplasmic	236
gi|116077320	SPD_0731	A0A0H2ZP77	DNA topology modulation protein FlaR, putative	SPD_0731	380	SPD_0731	Unknown function	Unknown function	Cytoplasmic	174
gi|116076256	SPD_0732	Q04L74	30S ribosomal protein S20	rpsT	380	RpsT	Protein synthesis	Ribosomal proteins	Cytoplasmic	78
gi|116076350	SPD_0733	Q04L73	Pantothenate kinase	coaA	381	CoaA	Metabolism of cofactors and vitamins	Pantothenate and CoA biosynthesis	Cytoplasmic	306
gi|116076954	SPD_0734	A0A0H2ZPL9	Membrane protein, putative	SPD_0734	382	SPD_0734	Unknown function	Unknown function	Membrane	146
gi|116076675	SPD_0735	A0A0H2ZMN6	Methyltransferase small domain, putative	SPD_0735	383	SPD_0735	Protein synthesis	Ribosomal proteins	Cytoplasmic	196
gi|116077051	SPD_0736	A0A0H2ZPY7	Pyrimidine-nucleoside phosphorylase	pdp	383	Pdp	Nucleotide metabolism	Pyrimidine metabolism	Cytoplasmic	425
gi|116077733	SPD_0737	Q04L69	Deoxyribose-phosphate aldolase	deoC	383	DeoC	Carbohydrate metabolism	Pentose phosphate pathway	Cytoplasmic	220
gi|116076693	SPD_0738	A0A0H2ZNY5	Cytidine deaminase	cdd-1	383	Cdd-1	Nucleotide metabolism	Pyrimidine metabolism	Cytoplasmic	129
gi|116077527	SPD_0739	A0A0H2ZR79	Probable membrane lipoprotein TmpC	SPD_0739	383	SPD_0739	Unknown function	Unknown function	Unknown	350
gi|116076430	SPD_0740	A0A0H2ZMV7	Sugar ABC transporter, ATP-binding protein	SPD_0740	383	SPD_0740	Transport and binding proteins	Carbohydrates, organic alcohols and acids	Membrane	511
gi|116076229	SPD_0741	A0A0H2ZMW5	Sugar ABC transporter, permease protein, putative	SPD_0741	383	SPD_0741	Unknown function	Unknown function	Membrane	352
gi|116077250	SPD_0742	A0A0H2ZPB8	Sugar ABC transporter, permease protein, putative	SPD_0742	383	SPD_0742	Transport and binding proteins	Carbohydrates, organic alcohols and acids	Membrane	318
gi|116076213	SPD_0745	Q04L63	Glycerol-3-phosphate acyltransferase	plsY	386	PlsY	Lipid metabolism	Glycerolipid metabolism	Membrane	213
gi|116077111	SPD_0746	A0A0H2ZNP3	DNA topoisomerase 4 subunit B	parE	387	ParE	DNA metabolism	DNA replication, recombination and repair	Cytoplasmic	647
gi|116076872	SPD_0747	A0A0H2ZPD8	Uncharacterized protein	SPD_0747	388	SPD_0747	Unknown function	Unknown function	Unknown	41
gi|116076207	SPD_0748	A0A0H2ZMD1	DNA topoisomerase 4 subunit A	parC	389	ParC	DNA metabolism	DNA replication, recombination and repair	Cytoplasmic	826
gi|116076578	SPD_0749	A0A0H2ZNB6	Branched-chain-amino-acid aminotransferase	ilvE	390	IlvE	Amino acid metabolism	Valine, leucine and isoleucine biosynthesis	Cytoplasmic	340
gi|116076286	SPD_0750	A0A0H2ZM54	Uncharacterized protein	SPD_0750	390	SPD_0750	Transport and binding proteins	Amino acids, peptides and amines	Cellwall	234
gi|116076842	SPD_0751	A0A0H2ZPB0	Membrane protein, putative	SPD_0751	391	SPD_0751	Unknown function	Unknown function	Membrane	229
gi|116077675	SPD_0752	A0A0H2ZRN4	Membrane protein, putative	SPD_0752	391	SPD_0752	Unknown function	Unknown function	Membrane	307
gi|116076040	SPD_0753	Q04L55	Pyrrolidone-carboxylate peptidase	pcp	391	Pcp	Protein fate	Degradation of proteins, peptides and glycopeptides	Cytoplasmic	214
gi|116076889	SPD_0754	A0A0H2ZPF4	Uncharacterized protein	SPD_0754	392	SPD_0754	Unknown function	Unknown function	Cytoplasmic	76
gi|116076101	SPD_0757	A0A0H2ZLT2	Ribosomal protein S1	rpsA	393	RpsA	Protein synthesis	Ribosomal proteins	Cytoplasmic	400
gi|116076215	SPD_0759	A0A0H2ZLN4	Uncharacterized protein	SPD_0759	395	SPD_0759	Unknown function	Unknown function	Unknown	165
gi|116077035	SPD_0760	A0A0H2ZNH8	DNA polymerase III, gamma and tau subunits	dnaX	395	DnaX	DNA metabolism	DNA replication, recombination and repair	Cytoplasmic	551
gi|116075957	SPD_0761	A0A0H2ZL53	Uncharacterized protein	SPD_0761	395	SPD_0761	Unknown function	Unknown function	Membrane	64
gi|116077784	SPD_0762	A0A0H2ZRV3	FeS assembly ATPase SufC	sufC	396	SufC	Metabolism of cofactors and vitamins	Metabolism of cofactors and vitamins - Other	Cytoplasmic	256
gi|116076685	SPD_0763	A0A0H2ZMP6	FeS assembly protein SufD	sufD	396	SufD	Metabolism of cofactors and vitamins	Metabolism of cofactors and vitamins - Other	Cytoplasmic	420
gi|116077528	SPD_0764	A0A0H2ZPW5	Cysteine desulfurase	sufS	396	SufS	Metabolism of other amino acids	Selenocompound metabolism	Cytoplasmic	408
gi|116077255	SPD_0765	A0A0H2ZQG7	SUF system FeS assembly protein, NifU family protein	SPD_0765	396	SPD_0765	Metabolism of cofactors and vitamins	Metabolism of cofactors and vitamins - Other	Unknown	146
gi|116076250	SPD_0766	A0A0H2ZM29	FeS assembly protein SufB	sufB	396	SufB	Metabolism of cofactors and vitamins	Metabolism of cofactors and vitamins - Other	Cytoplasmic	470
gi|116077082	SPD_0767	A0A0H2ZQ17	Penicillin-binding protein 3/D-alanyl-D-alanine carboxypeptidase	dacC	397	DacC	Glycan biosynthesis and metabolism	Peptidoglycan biosynthesis	Membrane	413
gi|116076701	SPD_0768	A0A0H2ZP63	Membrane protein, putative	yhhT_1	398	YhhT_1	Unknown function	Unknown function	Membrane	369
gi|116076141	SPD_0771	A0A0H2ZLV6	Lactose phosphotransferase system repressor	lacR1	401	LacR1	Transcription	Transcription factor	Cytoplasmic	246
gi|116077448	SPD_0772	A0A0H2ZPQ7	Tagatose-6-phosphate kinase	fruK	401	FruK	Carbohydrate metabolism	Fructose and mannose metabolism	Unknown	303
gi|116076797	SPD_0773	A0A0H2ZN94	PTS system, fructose specific IIABC components	fruAB	401	FruAB	Transport and binding proteins	Carbohydrates, organic alcohols and acids	Membrane	650
gi|116077592	SPD_0774	A0A0H2ZQ12	SpoE family protein	ftsK	402	FtsK	Cellular processes	Cell division	Membrane	767
gi|116077085	SPD_0775	A0A0H2ZPY1	Uncharacterized protein	SPD_0775	403	SPD_0775	Unknown function	Unknown function	Unknown	177
gi|116075982	SPD_0776	A0A0H2ZMD8	Aminotransferase, class V	iscS	404	IscS	Metabolism of cofactors and vitamins	Thiamine metabolism	Cytoplasmic	380
gi|116077235	SPD_0777	Q04L36	Probable tRNA sulfurtransferase	thiI	404	ThiI	Protein synthesis	tRNA and rRNA base modification	Cytoplasmic	404
gi|116076130	SPD_0778	A0A0H2ZLU8	Uncharacterized protein	SPD_0778	405	SPD_0778	Unknown function	Unknown function	Cytoplasmic	274
gi|116077603	SPD_0779	A0A0H2ZQ18	Uncharacterized protein	SPD_0779	405	SPD_0779	Unknown function	Unknown function	Membrane	111
gi|116076822	SPD_0780	A0A0H2ZNB3	Uncharacterized protein	SPD_0780	405	SPD_0780	Unknown function	Unknown function	Unknown	134
gi|116077636	SPD_0781	A0A0H2ZQ40	Uncharacterized protein	SPD_0781	405	SPD_0781	Unknown function	Unknown function	Cytoplasmic	388
gi|116076448	SPD_0782	A0A0H2ZMF0	Type I restriction-modification system, M subunit, putative	SPD_0782	406	SPD_0782	DNA metabolism	DNA modification	Unknown	497
gi|116075918	SPD_0783	A0A0H2ZLC9	Type I restriction-modification system, S subunit, putative	hsdS	406	HsdS	DNA metabolism	DNA modification	Cytoplasmic	203
gi|116076678	SPD_0784	A0A0H2ZP49	Type I restriction-modification system, R subunit, putative	hsdR	406	HsdR	DNA metabolism	DNA modification	Cytoplasmic	1116
gi|116076243	SPD_0785	A0A0H2ZME5	Uncharacterized protein	SPD_0785	407	SPD_0785	Unknown function	Unknown function	Unknown	66
gi|116077149	SPD_0786	A0A0H2ZPQ5	Arginine repressor	argR	408	ArgR	Amino acid metabolism	Arginine and proline metabolism	Cytoplasmic	156
gi|116076600	SPD_0787	Q04L26	Xaa-Pro dipeptidyl-peptidase	pepX	408	PepX	Protein fate	Degradation of proteins, peptides and glycopeptides	Extracellular	757
gi|116077420	SPD_0788	A0A0H2ZQC3	DNA polymerase III, alpha subunit	dnaE	409	DnaE	DNA metabolism	DNA replication, recombination and repair	Cytoplasmic	1033
gi|116076573	SPD_0789	Q04L24	ATP-dependent 6-phosphofructokinase	pfkA	409	PfkA	Carbohydrate metabolism	Glycolysis / Gluconeogenesis	Cytoplasmic	335
gi|116077446	SPD_0790	A0A0H2ZQE0	Pyruvate kinase	pyk	409	Pyk	Carbohydrate metabolism	Glycolysis / Gluconeogenesis	Cytoplasmic	501
gi|116076098	SPD_0791	A0A0H2ZMM4	Uncharacterized protein	SPD_0791	410	SPD_0791	Unknown function	Unknown function	Unknown	84
gi|116076681	SPD_0792	A0A0H2ZNX7	Lipoprotein, putative	SPD_0792	411	SPD_0792	Unknown function	Unknown function	Unknown	290
gi|116076254	SPD_0793	A0A0H2ZN62	Uncharacterized protein	SPD_0793	412	SPD_0793	Unknown function	Unknown function	Unknown	54
gi|116076659	SPD_0795	A0A0H2ZMM3	Uncharacterized protein	SPD_0795	414	SPD_0795	Unknown function	Unknown function	Cytoplasmic	103
gi|116077746	SPD_0796	A0A0H2ZRU0	Uncharacterized protein	SPD_0796	414	SPD_0796	Unknown function	Unknown function	Cytoplasmic	238
gi|116077325	SPD_0797	A0A0H2ZPH0	Uncharacterized protein	SPD_0797	415	SPD_0797	Transport and binding proteins	Unknown substrate	Membrane	271
gi|116077404	SPD_0798	A0A0H2ZPM5	Membrnae protein, puative	SPD_0798	415	SPD_0798	Unknown function	Unknown function	Membrane	301
gi|116076078	SPD_0799	A0A0H2ZLR7	Uncharacterized protein	SPD_0799	415	SPD_0799	Unknown function	Unknown function	Unknown	43
gi|116076917	SPD_0800	A0A0H2ZNJ2	Capsular polysaccharide biosynthesis protein, putative	SPD_0800	416	SPD_0800	Unknown function	Unknown function	Cytoplasmic	119
gi|116077750	SPD_0801	A0A0H2ZRD1	Uncharacterized protein	SPD_0801	416	SPD_0801	Cellular processes	Pathogenesis	Cytoplasmic	348
gi|116076657	SPD_0802	A0A0H2ZMZ1	S1 RNA binding domain	yhgF	417	YhgF	Unknown function	Unknown function	Cytoplasmic	709
gi|116077483	SPD_0803	A0A0H2ZR39	Uncharacterized protein	SPD_0803	418	SPD_0803	Cellular processes	Pathogenesis	Membrane	90
gi|116076320	SPD_0804	A0A0H2ZN40	ABC transporter, ATP-binding protein	SPD_0804	419	SPD_0804	Transport and binding proteins	Unknown substrate	Membrane	252
gi|116076821	SPD_0805	A0A0H2ZPF3	Transporter, permease protein, putative	SPD_0805	419	SPD_0805	Transport and binding proteins	Amino acids, peptides and amines	Membrane	662
gi|116075956	SPD_0806	A0A0H2ZLI1	Uncharacterized protein	SPD_0806	420	SPD_0806	Unknown function	Unknown function	Membrane	196
gi|116077010	SPD_0807	A0A0H2ZPB5	IS1239, transposase, putative	SPD_0807	421	SPD_0807	Unknown function	Unknown function	Unknown	291
gi|116076019	SPD_0808	A0A0H2ZM04	Uncharacterized protein	SPD_0808	422	SPD_0808	Unknown function	Unknown function	Unknown	37
gi|116077543	SPD_0809	A0A0H2ZRA0	Lysine decarboxylase	cad	423	Cad	Amino acid metabolism	Lysine degradation	Cytoplasmic	491
gi|116076301	SPD_0811	A0A0H2ZMJ1	Polyamine aminopropyl transferase	speE	425	SpeE	Metabolism of other amino acids	beta-Alanine metabolism	Cytoplasmic	286
gi|116077342	SPD_0812	A0A0H2ZP94	Saccharopine dehydrogenase	lys1	425	Lys1	Amino acid metabolism	Lysine degradation	Cytoplasmic	419
gi|116075971	SPD_0813	A0A0H2ZMC9	Carboxynorspermidine decarboxylase	nspC	425	NspC	Amino acid metabolism	Arginine and proline metabolism	Cytoplasmic	375
gi|116076621	SPD_0814	Q04L01	Putative agmatine deiminase	aguA	425	AguA	Amino acid metabolism	Arginine and proline metabolism	Cytoplasmic	361
gi|116077470	SPD_0815	A0A0H2ZR25	Hydrolase, carbon-nitrogen family protein	aguB	425	AguB	Amino acid metabolism	Arginine and proline metabolism	Cytoplasmic	291
gi|116076584	SPD_0816	A0A0H2ZNR9	Cof family protein	SPD_0816	426	SPD_0816	Unknown function	Enzymes of unknown specificity	Cytoplasmic	269
gi|116077291	SPD_0817	A0A0H2ZQ38	CAAX amino terminal protease family protein	SPD_0817	427	SPD_0817	Unknown function	Unknown function	Membrane	223
gi|116076245	SPD_0818	A0A0H2ZM26	Transcriptional regulator, LysR family protein	SPD_0818	428	SPD_0818	Transcription	Transcription - Other	Cytoplasmic	302
gi|116077113	SPD_0819	A0A0H2ZPM0	Lipoprotein signal peptidase	lspA	428	LspA	Protein fate	Protein and peptide secretion and trafficking	Membrane	153
gi|116075974	SPD_0820	A0A0H2ZLJ4	Pseudouridine synthase	rluD	428	RluD	Protein synthesis	tRNA and rRNA base modification	Cytoplasmic	295
gi|116076801	SPD_0821	A0A0H2ZNT8	Choline binding protein E	cbpE	428	CbpE	Cellular processes	Pathogenesis	Extracellular	627
gi|116077340	SPD_0822	Q04KZ3	Glutamate 5-kinase	proB	429	ProB	Amino acid metabolism	Arginine and proline metabolism	Cytoplasmic	369
gi|116076730	SPD_0823	Q04KZ2	Gamma-glutamyl phosphate reductase	proA	429	ProA	Amino acid metabolism	Arginine and proline metabolism	Cytoplasmic	420
gi|116077033	SPD_0824	A0A0H2ZNT1	Pyrroline-5-carboxylate reductase	proC	429	ProC	Amino acid metabolism	Arginine and proline metabolism	Cytoplasmic	265
gi|116077137	SPD_0825	Q04KZ0	Thymidylate kinase	tmk	430	Tmk	Nucleotide metabolism	Pyrimidine metabolism	Cytoplasmic	212
gi|116076291	SPD_0826	A0A0H2ZM57	DNA polymerase III, delta prime subunit	holB	430	HolB	DNA metabolism	DNA replication, recombination and repair	Cytoplasmic	296
gi|116076908	SPD_0827	Q04KY8	Initiation-control protein YabA	SPD_0827	430	SPD_0827	DNA metabolism	DNA replication, recombination and repair	Cytoplasmic	105
gi|116076095	SPD_0828	A0A0H2ZMT4	Ribosomal RNA small subunit methyltransferase I	rsm1	430	Rsm1	Protein synthesis	tRNA and rRNA base modification	Cytoplasmic	289
gi|116077793	SPD_0829	A0A0H2ZQG2	Uncharacterized protein	SPD_0829	431	SPD_0829	Unknown function	Unknown function	Unknown	172
gi|116076595	SPD_0830	A0A0H2ZNS7	IS1381, transposase OrfB	SPD_0830	433	SPD_0830	Unknown function	Unknown function	Unknown	129
gi|116076991	SPD_0831	A0A0H2ZNP6	Conserved domain protein	SPD_0831	432	SPD_0831	Unknown function	Unknown function	Membrane	215
gi|116076862	SPD_0832	A0A0H2ZNY0	IS1381, transposase OrfA	SPD_0832	433	SPD_0832	Unknown function	Unknown function	Cytoplasmic	129
gi|116077218	SPD_0833	Q04KY2	Methylenetetrahydrofolate--tRNA-(uracil-5-)-methyltransferase TrmFO	gid	434	Gid	Protein synthesis	tRNA and rRNA base modification	Cytoplasmic	444
gi|116075886	SPD_0834	Q04KY1	Uridylate kinase	pyrH	434	PyrH	Nucleotide metabolism	Pyrimidine metabolism	Cytoplasmic	245
gi|116077433	SPD_0835	Q04KY0	Ribosome-recycling factor	frr	434	Frr	Protein synthesis	Translation factors	Cytoplasmic	185
gi|116076161	SPD_0836	A0A0H2ZLJ5	Uncharacterized protein	SPD_0836	434	SPD_0836	Protein synthesis	Protein synthesis - Other	Cytoplasmic	297
gi|116077644	SPD_0837	Q04KX8	UPF0346 protein SPD	SPD_0837	434	SPD_0837	Unknown function	Unknown function	Unknown	71
gi|116076604	SPD_0838	A0A0H2ZMV3	PhoH family protein	SPD_0838	435	SPD_0838	Unknown function	Unknown function	Cytoplasmic	322
gi|116076830	SPD_0839	A0A0H2ZP99	Acetyltransferase, GNAT family protein	SPD_0839	436	SPD_0839	Unknown function	Unknown function	Cytoplasmic	166
gi|116077699	SPD_0840	A0A0H2ZR76	Uncharacterized protein	SPD_0840	436	SPD_0840	Transcription	Transcription factor	Unknown	75
gi|116076571	SPD_0842	A0A0H2ZNX5	Acetyltransferase, GNAT family protein	SPD_0842	438	SPD_0842	Unknown function	Unknown function	Cytoplasmic	189
gi|116076916	SPD_0843	A0A0H2ZPM3	Competence protein CelA	celA	438	CelA	Cellular processes	DNA transformation	Membrane	216
gi|116076076	SPD_0844	A0A0H2ZM48	Competence protein CelB	celB	438	CelB	Cellular processes	DNA transformation	Membrane	746
gi|116076650	SPD_0845	A0A0H2ZP29	ABC transporter, ATP-binding protein	kpsT_1	439	KpsT_1	Transport and binding proteins	Amino acids, peptides and amines	Unknown	158
gi|116077745	SPD_0846	A0A0H2ZRC4	Membrane protein, putative	SPD_0846	440	SPD_0846	Unknown function	Unknown function	Membrane	393
gi|116076220	SPD_0847	Q04KW9	Translation initiation factor IF-3	infC	441	InfC	Protein synthesis	Translation factors	Cytoplasmic	185
gi|116077034	SPD_0848	Q04KW8	50S ribosomal protein L35	rpmI	441	RpmI	Protein synthesis	Ribosomal proteins	Cytoplasmic	66
gi|116077121	SPD_0849	Q04KW7	50S ribosomal protein L20	rplT	441	RplT	Protein synthesis	Ribosomal proteins	Cytoplasmic	119
gi|116076288	SPD_0850	A0A0H2ZN15	Lactoylglutathione lyase	gloA	441	GloA	Carbohydrate metabolism	Pyruvate metabolism	Cytoplasmic	126
gi|116076552	SPD_0851	A0A0H2ZMC4	Dihydroorotate dehydrogenase B (NAD(+)), electron transfer subunit	pyrK	442	PyrK	Nucleotide metabolism	Pyrimidine metabolism	Cytoplasmic	266
gi|116077633	SPD_0852	A0A0H2ZRF9	Dihydroorotate dehydrogenase	pyrDb	442	PyrDb	Nucleotide metabolism	Pyrimidine metabolism	Cytoplasmic	312
gi|116077688	SPD_0853	A0A0H2ZR63	Endo-beta-N-acetylglucosaminidase, putative	lytB	443	LytB	Glycan biosynthesis and metabolism	Glycan degradation	Extracellular	702
gi|116076861	SPD_0854	A0A0H2ZPC8	Adherence and virulence protein A	pavA	444	PavA	Cellular processes	Pathogenesis	Cytoplasmic	551
gi|116076920	SPD_0855	Q04KW1	Endoribonuclease YbeY	SPD_0855	445	SPD_0855	Protein synthesis	Protein synthesis - Other	Cytoplasmic	165
gi|116076190	SPD_0856	A0A0H2ZMU1	Diacylglycerol kinase	dgkA	445	DgkA	Lipid metabolism	Glycerolipid metabolism	Membrane	131
gi|116077338	SPD_0857	Q04KV9	GTPase Era	era	445	Era	Protein synthesis	Protein synthesis - Other	Membrane	299
gi|116076501	SPD_0858	A0A0H2ZNP5	Formamidopyrimidine-DNA glycosylase	mutM	445	MutM	DNA metabolism	DNA replication, recombination and repair	Cytoplasmic	274
gi|116077573	SPD_0859	A0A0H2ZR88	Dephospho-CoA kinase	coaE	445	CoaE	Metabolism of cofactors and vitamins	Pantothenate and CoA biosynthesis	Membrane	201
gi|116076759	SPD_0860	A0A0H2ZN71	Multi-drug resistance efflux pump	pmrA	445	PmrA	Transport and binding proteins	Unknown substrate	Membrane	399
gi|116077421	SPD_0861	A0A0H2ZQX6	Preprotein translocase, SecG subunit	secG	445	SecG	Protein fate	Protein and peptide secretion and trafficking	Membrane	77
gi|116076512	SPD_0862	A0A0H2ZNQ5	Ribonuclease R	rnr	446	Rnr	Transcription	Degradation of RNA	Cytoplasmic	784
gi|116077026	SPD_0863	Q04KV3	SsrA-binding protein	smpB	446	SmpB	Protein synthesis	Protein synthesis - Other	Cytoplasmic	155
gi|116076183	SPD_0864	A0A0H2ZMT7	Tellurite resistance protein TehB	tehB	446	TehB	Cellular processes	Toxin production and resistance	Cytoplasmic	286
gi|116076834	SPD_0865	A0A0H2ZNC2	Competence protein CoiA	coiA	447	CoiA	Unknown function	Unknown function	Cytoplasmic	317
gi|116075988	SPD_0866	A0A0H2ZL72	Oligoendopeptidase F	pepF	447	PepF	Protein fate	Degradation of proteins, peptides and glycopeptides	Cytoplasmic	600
gi|116076594	SPD_0867	A0A0H2ZMH1	O-methyltransferase	SPD_0867	447	SPD_0867	Unknown function	Unknown function	Cytoplasmic	237
gi|116077659	SPD_0868	Q04KU8	Foldase protein PrsA	prsA	448	PrsA	Protein fate	Protein folding and stabilization	Membrane	313
gi|116076503	SPD_0869	A0A0H2ZM87	Uncharacterized protein	SPD_0869	449	SPD_0869	Unknown function	Unknown function	Unknown	80
gi|116077329	SPD_0870	A0A0H2ZQJ1	Phosphoglycerate mutase family protein	gpmB	450	GpmB	Carbohydrate metabolism	Glycolysis / Gluconeogenesis	Cytoplasmic	206
gi|116076689	SPD_0871	A0A0H2ZNK1	Cys-tRNA(Pro)/Cys-tRNA(Cys) deacylase	ybaK	450	YbaK	Protein synthesis	Protein synthesis - Other	Cytoplasmic	160
gi|116077562	SPD_0872	A0A0H2ZQS6	Membrane protein, putative	SPD_0872	450	SPD_0872	Unknown function	Unknown function	Membrane	280
gi|116077593	SPD_0873	A0A0H2ZPV5	Uncharacterized protein	SPD_0873	451	SPD_0873	Unknown function	Unknown function	Cytoplasmic	266
gi|116076748	SPD_0874	Q04KU2	Bifunctional protein GlmU	glmU	452	GlmU	Carbohydrate metabolism	Amino sugar and nucleotide sugar metabolism	Cytoplasmic	459
gi|116075944	SPD_0875	A0A0H2ZMG9	Hydrolase, NUDIX family protein	nudF	452	NudF	Nucleotide metabolism	Purine metabolism	Cytoplasmic	181
gi|116077014	SPD_0876	A0A0H2ZNG3	Membrane protein MacP	SPD_0876	452	MacP	Glycan biosynthesis and metabolism	Peptidoglycan biosynthesis	Membrane	104
gi|116077315	SPD_0877	A0A0H2ZQH7	5'-methylthioadenosine/S-adenosylhomocysteine nucleosidase 2	mtnN	452	MtnN	Amino acid metabolism	Cysteine and methionine metabolism	Unknown	230
gi|116075907	SPD_0878	A0A0H2ZKY7	Uncharacterized protein	SPD_0878	453	SPD_0878	Unknown function	Unknown function	Cytoplasmic	163
gi|116076514	SPD_0879	A0A0H2ZM96	Exonuclease	dnaQ	454	DnaQ	DNA metabolism	DNA replication, recombination and repair	Cytoplasmic	196
gi|116077076	SPD_0880	A0A0H2ZQ11	Glycerophosphoryl diester phosphodiesterase family protein	glpQ	454	GlpQ	Lipid metabolism	Glycerophospholipid metabolism	Membrane	587
gi|116515422	SPD_0882	Q04KT5	IS630-Spn1, transposase Orf2, truncation	SPD_0882	456	SPD_0882	Unknown function	Unknown function
gi|116077065	SPD_0883	A0A0H2ZNV2	Uncharacterized protein	SPD_0883	457	SPD_0883	Unknown function	Unknown function	Unknown	66
gi|116077596	SPD_0884	A0A0H2ZRG1	Uncharacterized protein	SPD_0884	457	SPD_0884	Unknown function	Unknown function	Membrane	134
gi|116076847	SPD_0885	A0A0H2ZPB6	Cytochrome c-type biogenesis protein CcdA	ccdA-2	458	CcdA-2	Energy metabolism	Electron transport	Membrane	235
gi|116077635	SPD_0886	A0A0H2ZRJ5	Thioredoxin family protein	SPD_0886	458	SPD_0886	Unknown function	Unknown function	Cellwall	185
gi|116076850	SPD_0887	A0A0H2ZND5	Amino acid permease family protein	SPD_0887	458	SPD_0887	Transport and binding proteins	Amino acids, peptides and amines	Membrane	463
gi|116076315	SPD_0888	A0A0H2ZN35	Adhesion lipoprotein	lmb	459	Lmb	Transport and binding proteins	Other transport and binding proteins	Membrane	305
gi|116076723	SPD_0889	A0A0H2ZP82	Pneumococcal histidine triad protein D	phtD	459	PhtD	Cellular processes	Pathogenesis	Unknown	853
gi|116077098	SPD_0890	A0A0H2ZNY2	Pneumococcal histidine triad protein E	phtE	460	PhtE	Cellular processes	Pathogenesis	Unknown	1039
gi|116077492	SPD_0893	A0A0H2ZQZ8	Uncharacterized protein	SPD_0893	463	SPD_0893	Cellular processes	Pathogenesis	Cytoplasmic	209
gi|116076437	SPD_0894	Q04KS5	Peptidase T	pepT	464	PepT	Protein fate	Degradation of proteins, peptides and glycopeptides	Cytoplasmic	406
gi|116077609	SPD_0895	Q04KS4	Ferrochelatase	hemH	465	HemH	Metabolism of cofactors and vitamins	Porphyrin and chlorophyll metabolism	Cytoplasmic	364
gi|116076742	SPD_0896	A0A0H2ZMT3	Large conductance mechanosensitive channel protein MscL	mscL	466	MscL	Cellular processes	Adaptations to atypical conditions	Membrane	125
gi|116077598	SPD_0897	A0A0H2ZPV9	GtrA family protein	SPD_0897	467	SPD_0897	Unknown function	Unknown function	Membrane	143
gi|116076068	SPD_0898	A0A0H2ZLD5	Membrane protein, putative	SPD_0898	468	SPD_0898	Transport and binding proteins	Nucleosides, purines and pyrimidines	Membrane	169
gi|116077013	SPD_0900	A0A0H2ZNR4	Aspartate-semialdehyde dehydrogenase	asd	470	Asd	Amino acid metabolism	Lysine biosynthesis	Cytoplasmic	358
gi|116076814	SPD_0901	Q04KR9	4-hydroxy-tetrahydrodipicolinate synthase	dapA	470	DapA	Amino acid metabolism	Lysine biosynthesis	Cytoplasmic	311
gi|116077424	SPD_0902	Q04KR8	tRNA modification GTPase MnmE	trmE	471	TrmE	Protein synthesis	tRNA and rRNA base modification	Cytoplasmic	457
gi|116075962	SPD_0903	A0A0H2ZMI4	4-oxalocrotonate tautomerase	xylH	472	XylH	Xenobiotics biodegradation and metabolism	Benzoate degradation	Unknown	60
gi|116076996	SPD_0904	A0A0H2ZNP9	Thymidine kinase	tdk	473	Tdk	Nucleotide metabolism	Pyrimidine metabolism	Cytoplasmic	199
gi|116076646	SPD_0905	A0A0H2ZMY2	Acetyltransferase, GNAT family protein	speG	473	SpeG	Amino acid metabolism	Arginine and proline metabolism	Cytoplasmic	159
gi|116077729	SPD_0906	Q04KR4	Peptide chain release factor 1	prfA	473	PrfA	Protein synthesis	Translation factors	Cytoplasmic	359
gi|116077756	SPD_0907	A0A0H2ZRD8	Release factor glutamine methyltransferase	hemK	473	HemK	Protein fate	Protein modification and repair	Cytoplasmic	279
gi|116077037	SPD_0908	A0A0H2ZPD7	Sua5/YciO/YrdC/YwlC family protein	tsaC	473	TsaC	Unknown function	Enzymes of unknown specificity	Cytoplasmic	200
gi|116075964	SPD_0909	A0A0H2ZL58	Acetyltransferase, GNAT family protein	SPD_0909	473	SPD_0909	Amino acid metabolism	Tyrosine metabolism	Cytoplasmic	143
gi|116077581	SPD_0910	Q04KR0	Serine hydroxymethyltransferase	glyA	473	GlyA	Amino acid metabolism	Glycine, serine and threonine metabolism	Cytoplasmic	418
gi|116076754	SPD_0911	A0A0H2ZMU3	Uncharacterized protein	SPD_0911	474	SPD_0911	Unknown function	Unknown function	Cytoplasmic	335
gi|116077377	SPD_0912	A0A0H2ZQP0	Pneumococcal vaccine antigen A	pvaA	475	PvaA	Unknown function	Unknown function	Membrane	204
gi|116077472	SPD_0913	A0A0H2ZPS2	Uncharacterized protein	SPD_0913	476	SPD_0913	Unknown function	Unknown function	Unknown	324
gi|116076383	SPD_0914	A0A0H2ZMQ8	23S rRNA (Uracil-5-)-methyltransferase RumA	rumA-1	477	RumA-1	Protein synthesis	tRNA and rRNA base modification	Cytoplasmic	543
gi|116077744	SPD_0915	A0A0H2ZRN8	Iron-compound ABC transporter, iron compound-binding protein	SPD_0915	478	SPD_0915	Transport and binding proteins	Cations and iron carrying compounds	Unknown	341
gi|116077041	SPD_0916	A0A0H2ZPU7	Iron-compound ABC transporter, permease protein	SPD_0916	478	SPD_0916	Transport and binding proteins	Cations and iron carrying compounds	Membrane	335
gi|116077293	SPD_0917	A0A0H2ZPF2	Iron-compound ABC transporter, permease protein	SPD_0917	478	SPD_0917	Transport and binding proteins	Cations and iron carrying compounds	Membrane	335
gi|116076062	SPD_0918	A0A0H2ZLQ5	Iron-compound ABC transporter, ATP-binding protein	SPD_0918	478	SPD_0918	Transport and binding proteins	Cations and iron carrying compounds	Membrane	264
gi|116077546	SPD_0919	A0A0H2ZR59	Uncharacterized protein	SPD_0919	479	SPD_0919	Cellular processes	Pathogenesis	Unknown	51
gi|116076510	SPD_0920	A0A0H2ZNI9	Uncharacterized protein	SPD_0920	480	SPD_0920	Unknown function	Unknown function	Unknown	53
gi|116075909	SPD_0921	A0A0H2ZLP9	Site-specific recombinase, resolvase family protein	ccrB	481	CcrB	DNA metabolism	DNA modification	Cytoplasmic	559
gi|116077243	SPD_0922	A0A0H2ZPY9	Uncharacterized protein	SPD_0922	482	SPD_0922	Unknown function	Unknown function	Cytoplasmic	203
gi|116076442	SPD_0923	A0A0H2ZM42	Uncharacterized protein	SPD_0923	483	SPD_0923	Unknown function	Unknown function	Unknown	65
gi|116077558	SPD_0924	A0A0H2ZRC2	Uncharacterized protein	SPD_0924	484	SPD_0924	Unknown function	Unknown function	Cytoplasmic	271
gi|116076642	SPD_0925	A0A0H2ZMK8	Hydrolase, putative	SPD_0925	485	SPD_0925	Unknown function	Unknown function	Unknown	284
gi|116077700	SPD_0926	A0A0H2ZRQ7	Uncharacterized protein	SPD_0926	485	SPD_0926	Unknown function	Enzymes of unknown specificity	Unknown	294
gi|116077282	SPD_0927	A0A0H2ZQJ3	Neopullulanase	nplT	486	NplT	Carbohydrate metabolism	Carbohydrate metabolism - Other	Cytoplasmic	587
gi|116076299	SPD_0928	A0A0H2ZN25	Uncharacterized protein	SPD_0928	487	SPD_0928	Unknown function	Unknown function	Cytoplasmic	105
gi|116076464	SPD_0929	A0A0H2ZMY7	Uncharacterized protein	SPD_0929	487	SPD_0929	Unknown function	Unknown function	Unknown	93
gi|116076536	SPD_0930	A0A0H2ZMN0	Transcriptional regulator, putative	SPD_0930	488	SPD_0930	Unknown function	Unknown function	Cytoplasmic	158
gi|116076142	SPD_0931	A0A0H2ZLI2	Uncharacterized protein	SPD_0931	488	SPD_0931	Unknown function	Unknown function	Cytoplasmic	253
gi|116077217	SPD_0932	A0A0H2ZP98	Uncharacterized protein	SPD_0932	488	SPD_0932	Unknown function	Unknown function	Unknown	258
gi|116076980	SPD_0933	A0A0H2ZPS4	Uncharacterized protein	SPD_0933	488	SPD_0933	Unknown function	Unknown function	Cytoplasmic	150
gi|116076075	SPD_0934	A0A0H2ZMK5	Tn5252, Orf 10 protein	SPD_0934	489	SPD_0934	Unknown function	Unknown function	Cytoplasmic	119
gi|116077608	SPD_0935	A0A0H2ZQ23	Tn5252, Orf 9 protein	SPD_0935	489	SPD_0935	Unknown function	Unknown function	Cytoplasmic	109
gi|116076783	SPD_0936	A0A0H2ZNS5	Tn5252, relaxase	SPD_0936	489	SPD_0936	Unknown function	Unknown function	Cytoplasmic	205
gi|116076334	SPD_0938	A0A0H2ZML7	Uncharacterized protein	SPD_0938	491	SPD_0938	Unknown function	Unknown function	Cytoplasmic	195
gi|116076964	SPD_0939	A0A0H2ZNB8	Transcriptional activator, Rgg/GadR/MutR family protein	SPD_0939	492	SPD_0939	Regulatory functions	DNA interactions	Cytoplasmic	284
gi|116076255	SPD_0940	A0A0H2ZM34	UDP-N-acetyl-D-mannosaminuronic acid dehydrogenase, putative	SPD_0940	493	SPD_0940	Carbohydrate metabolism	Fructose and mannose metabolism	Cytoplasmic	431
gi|116077134	SPD_0941	A0A0H2ZP16	Uncharacterized protein	SPD_0941	493	SPD_0941	Unknown function	Unknown function	Cytoplasmic	202
gi|116076061	SPD_0942	A0A0H2ZMQ7	Uncharacterized protein	SPD_0942	493	SPD_0942	Carbohydrate metabolism	Fructose and mannose metabolism	Cytoplasmic	260
gi|116077614	SPD_0943	A0A0H2ZQ28	Uncharacterized protein	SPD_0943	493	SPD_0943	Unknown function	Unknown function	Cytoplasmic	630
gi|116076047	SPD_0944	A0A0H2ZLB6	Uncharacterized protein	SPD_0944	493	SPD_0944	Unknown function	Unknown function	Unknown	368
gi|116077107	SPD_0945	A0A0H2ZQ03	AMP-binding enzyme, putative	SPD_0945	493	SPD_0945	Unknown function	Unknown function	Cytoplasmic	436
gi|116076285	SPD_0946	A0A0H2ZN84	Uncharacterized protein	SPD_0946	493	SPD_0946	Unknown function	Unknown function	Cytoplasmic	407
gi|116076474	SPD_0947	A0A0H2ZMG7	Membrane protein, putative	SPD_0947	493	SPD_0947	Unknown function	Unknown function	Membrane	311
gi|116077565	SPD_0948	A0A0H2ZPT1	Uncharacterized protein	SPD_0948	493	SPD_0948	Unknown function	Unknown function	Unknown	399
gi|116076617	SPD_0949	A0A0H2ZP08	Bacterial transferase hexapeptide (Three repeats), putative	SPD_0949	493	SPD_0949	Unknown function	Unknown function	Cytoplasmic	199
gi|116076107	SPD_0950	A0A0H2ZLT5	Transporter, major facilitator family protein	SPD_0950	494	SPD_0950	Unknown function	Unknown function	Membrane	403
gi|116076516	SPD_0951	A0A0H2ZN39	Uncharacterized protein	immR	495	ImmR	Transcription	Transcription factor	Cytoplasmic	73
gi|116077795	SPD_0952	A0A0H2ZRW0	Cell division protein FtsW, putative	SPD_0952	496	SPD_0952	Cellular processes	Cell division	Membrane	409
gi|116076616	SPD_0953	Q04KL8	Phosphoenolpyruvate carboxylase	ppc	496	Ppc	Carbohydrate metabolism	Pyruvate metabolism	Cytoplasmic	898
gi|116077698	SPD_0954	A0A0H2ZRK0	Uncharacterized protein	SPD_0954	497	SPD_0954	Transport and binding proteins	Amino acids, peptides and amines	Unknown	344
gi|116075905	SPD_0955	A0A0H2ZMA4	Amino acid or sugar ABC transport systems, permease protein	SPD_0955	497	SPD_0955	Transport and binding proteins	Amino acids, peptides and amines	Membrane	288
gi|116076993	SPD_0956	A0A0H2ZPQ8	ABC transporter, ATP-binding protein	SPD_0956	497	SPD_0956	Transport and binding proteins	Carbohydrates, organic alcohols and acids	Membrane	252
gi|116076173	SPD_0957	A0A0H2ZMA9	DNA primase	dnaG	498	DnaG	DNA metabolism	DNA replication, recombination and repair	Cytoplasmic	586
gi|116077214	SPD_0958	A0A0H2ZQA1	RNA polymerase sigma factor SigA	rpoD	498	RpoD	Transcription	Transcription factor	Cytoplasmic	369
gi|116077372	SPD_0959	A0A0H2ZQ95	Uncharacterized protein	SPD_0959	498	SPD_0959	Unknown function	Unknown function	Cytoplasmic	109
gi|116077341	SPD_0960	A0A0H2ZPH7	Glycosyl transferase CpoA	cpoA	498	CpoA	Glycan biosynthesis and metabolism	Peptidoglycan biosynthesis	Cytoplasmic	374
gi|116076055	SPD_0961	A0A0H2ZMQ4	Glycosyl transferase, group 1	mgs	498	Mgs	Lipid metabolism	Glycerolipid metabolism	Cytoplasmic	441
gi|116077054	SPD_0962	A0A0H2ZNJ5	Uncharacterized protein	SPD_0962	498	SPD_0962	Cellular processes	Pathogenesis	Membrane	58
gi|116076741	SPD_0963	A0A0H2ZN58	Uncharacterized protein	SPD_0963	498	SPD_0963	Unknown function	Unknown function	Membrane	44
gi|116075897	SPD_0964	Q04KK7	GTPase Obg	obgE	499	ObgE	Protein synthesis	Protein synthesis - Other	Cytoplasmic	436
gi|116076599	SPD_0965	A0A0H2ZMH5	Uncharacterized protein	SPD_0965	499	SPD_0965	Carbohydrate metabolism	Amino sugar and nucleotide sugar metabolism	Extracellular	52
gi|116076460	SPD_0967	A0A0H2ZNL3	UDP-N-acetylglucosamine 1-carboxyvinyltransferase	murA-1	501	MurA-1	Glycan biosynthesis and metabolism	Peptidoglycan biosynthesis	Cytoplasmic	419
gi|116077053	SPD_0968	A0A0H2ZNU3	Acetyltransferase, GNAT family protein	ydaF_5	501	YdaF_5	Unknown function	Unknown function	Membrane	183
gi|116077715	SPD_0969	A0A0H2ZR90	Uncharacterized protein	SPD_0969	501	SPD_0969	Unknown function	Unknown function	Cytoplasmic	425
gi|116077102	SPD_0970	A0A0H2ZPK7	Methionine aminopeptidase	map	501	Map	Protein fate	Protein modification and repair	Cytoplasmic	286
gi|116075989	SPD_0971	A0A0H2ZME1	IS1381, transposase OrfA	SPD_0971	502	SPD_0971	Unknown function	Unknown function	Membrane	132
gi|116077162	SPD_0972	A0A0H2ZQA4	IS1381, transposase OrfB	SPD_0972	502	SPD_0972	Unknown function	Unknown function	Unknown	129
gi|116076290	SPD_0973	A0A0H2ZN88	ATP-dependent DNA helicase PcrA	pcrA	503	PcrA	DNA metabolism	DNA replication, recombination and repair	Cytoplasmic	763
gi|116077591	SPD_0974	A0A0H2ZRF7	Class I glutamine amidotransferase, putative	SPD_0974	504	SPD_0974	Unknown function	Unknown function	Cytoplasmic	229
gi|116077188	SPD_0975	Q04KJ8	DNA repair protein RadC	radC	503	RadC	DNA metabolism	DNA replication, recombination and repair	Cytoplasmic	226
gi|116075984	SPD_0976	Q04KJ6	Redox-sensing transcriptional repressor Rex	rex	504	Rex	Transcription	Transcription factor	Membrane	213
gi|116076863	SPD_0977	A0A0H2ZPI1	Uncharacterized protein	SPD_0977	505	SPD_0977	Unknown function	Unknown function	Unknown	83
gi|116076149	SPD_0978	A0A0H2ZLI7	Uncharacterized protein	SPD_0978	506	SPD_0978	Unknown function	Unknown function	Unknown	115
gi|116076031	SPD_0979	A0A0H2ZM13	Aminotransferase, class V	iscS	507	IscS	Metabolism of cofactors and vitamins	Thiamine metabolism	Cytoplasmic	371
gi|116077611	SPD_0980	A0A0H2ZRD4	Ribose-phosphate pyrophosphokinase	prs2	507	Prs2	Carbohydrate metabolism	Pentose phosphate pathway	Cytoplasmic	319
gi|116076786	SPD_0981	A0A0H2ZMW8	Adenylate cyclase, putative	SPD_0981	508	SPD_0981	Unknown function	Unknown function	Cytoplasmic	189
gi|116076326	SPD_0982	A0A0H2ZN46	Pyrophosphokinase family protein	SPD_0982	509	SPD_0982	Nucleotide metabolism	Purine metabolism	Cytoplasmic	223
gi|116076441	SPD_0983	Q04KI9	NAD kinase	ppnK	509	PpnK	Metabolism of cofactors and vitamins	Nicotinate and nicotinamide metabolism	Cytoplasmic	272
gi|116076738	SPD_0984	A0A0H2ZNP4	Pseudouridine synthase	SPD_0984	509	SPD_0984	Protein synthesis	tRNA and rRNA base modification	Cytoplasmic	298
gi|116076866	SPD_0985	A0A0H2ZPD3	Phosphate acetyltransferase	eutD	509	EutD	Carbohydrate metabolism	Pyruvate metabolism	Cytoplasmic	324
gi|116077187	SPD_0987	Q04KI6	Nucleoid-associated protein SPD	SPD_0987	511	SPD_0987	Unknown function	General	Unknown	99
gi|116077429	SPD_0988	A0A0H2ZPH9	Integral membrane protein	SPD_0988	512	SPD_0988	Unknown function	Unknown function	Membrane	234
gi|116077323	SPD_0989	Q04KI4	50S ribosomal protein L21	rplU	513	RplU	Protein synthesis	Ribosomal proteins	Unknown	104
gi|116076016	SPD_0990	A0A0H2ZMG0	Uncharacterized protein	SPD_0990	513	SPD_0990	Unknown function	Unknown function	Cytoplasmic	114
gi|116076039	SPD_0991	Q04KI2	50S ribosomal protein L27	rpmA	513	RpmA	Protein synthesis	Ribosomal proteins	Cytoplasmic	97
gi|116076982	SPD_0992	A0A0H2ZND2	Uncharacterized protein	SPD_0992	514	SPD_0992	Unknown function	Unknown function	Unknown	56
gi|116076796	SPD_0993	A0A0H2ZPD5	Uncharacterized protein	SPD_0993	514	SPD_0993	Unknown function	Unknown function	Extracellular	42
gi|116077683	SPD_0994	A0A0H2ZRN9	Riboflavin biosynthesis protein RibF	ribF	515	RibF	Metabolism of cofactors and vitamins	Riboflavin metabolism	Cytoplasmic	305
gi|116076598	SPD_0995	A0A0H2ZMU9	Membrane protein, putative	SPD_0995	516	SPD_0995	Transport and binding proteins	Unknown substrate	Membrane	282
gi|116077752	SPD_0996	A0A0H2ZQB2	DegV family protein	SPD_0996	517	SPD_0996	Unknown function	General	Cytoplasmic	279
gi|116076781	SPD_0997	A0A0H2ZMW4	DNA-binding protein HU	hup	518	Hup	DNA metabolism	DNA modification	Cytoplasmic	91
gi|116077350	SPD_0998	A0A0H2ZQ80	ABC transporter, ATP-binding protein	SPD_0998	519	SPD_0998	Transport and binding proteins	Unknown substrate	Cytoplasmic	633
gi|116077358	SPD_0999	A0A0H2ZPJ0	Transcriptional regulator MutR, putative	SPD_0999	519	SPD_0999	Regulatory functions	DNA interactions	Cytoplasmic	287
gi|116076274	SPD_1000	A0A0H2ZLT1	Transporter, major facilitator family protein	SPD_1000	520	SPD_1000	Unknown function	Unknown function	Membrane	392
gi|116077046	SPD_1001	Q04KH2	DNA ligase	ligA	521	LigA	DNA metabolism	DNA replication, recombination and repair	Cytoplasmic	652
gi|116075938	SPD_1002	A0A0H2ZLE5	Pullulanase, type I	pulA	522	PulA	Carbohydrate metabolism	Carbohydrate metabolism - Other	Cytoplasmic	759
gi|116076266	SPD_1003	A0A0H2ZMG1	Uncharacterized protein	SPD_1003	523	SPD_1003	Unknown function	Unknown function	Unknown	57
gi|116077099	SPD_1004	A0A0H2ZNN4	Glyceraldehyde-3-phosphate dehydrogenase, NADP-dependent	gapN	524	GapN	Carbohydrate metabolism	Glycolysis / Gluconeogenesis	Cytoplasmic	474
gi|116077713	SPD_1005	Q04KG8	1,4-alpha-glucan branching enzyme GlgB	glgB	525	GlgB	Carbohydrate metabolism	Starch and sucrose metabolism	Cytoplasmic	642
gi|116076902	SPD_1006	Q04KG7	Glucose-1-phosphate adenylyltransferase	glgC	525	GlgC	Carbohydrate metabolism	Starch and sucrose metabolism	Cytoplasmic	380
gi|116076837	SPD_1007	A0A0H2ZNV9	Glucose-1-phosphate adenylyltransferase, GlgD subunit	glgD	525	GlgD	Carbohydrate metabolism	Starch and sucrose metabolism	Unknown	379
gi|116077059	SPD_1008	Q04KG5	Glycogen synthase	glgA	525	GlgA	Carbohydrate metabolism	Starch and sucrose metabolism	Cytoplasmic	477
gi|116077769	SPD_1010	A0A0H2ZRY9	Uncharacterized protein	SPD_1010	527	SPD_1010	Unknown function	Unknown function	Cytoplasmic	148
gi|116075943	SPD_1011	A0A0H2ZLS4	Glycerate kinase	glxK	528	GlxK	Carbohydrate metabolism	Glyoxylate and dicarboxylate metabolism	Unknown	371
gi|116077344	SPD_1012	Q04KG2	Enolase	eno	529	Eno	Carbohydrate metabolism	Glycolysis / Gluconeogenesis	Cytoplasmic	434
gi|116076528	SPD_1013	A0A0H2ZNK4	Integrase/recombinase, phage integrase family protein	SPD_1013	530	SPD_1013	DNA metabolism	DNA replication, recombination and repair	Unknown	148
gi|116076427	SPD_1014	A0A0H2ZMD9	IS630-Spn1, transposase Orf1	SPD_1014	530	SPD_1014	Unknown function	Unknown function	Unknown	116
gi|251764802	SPD_1015	Q04KF9	ATP-dependent helicase/deoxyribonuclease subunit B	rexB	531	RexB	DNA metabolism	DNA replication, recombination and repair	Membrane	1091
gi|116076020	SPD_1016	Q04KF8	ATP-dependent helicase/nuclease subunit A	rexA	531	RexA	DNA metabolism	DNA replication, recombination and repair	Cytoplasmic	1216
gi|116077589	SPD_1017	A0A0H2ZRB0	Uncharacterized protein	SPD_1017	532	SPD_1017	Unknown function	Unknown function	Cytoplasmic	392
gi|116076919	SPD_1018	A0A0H2ZPI5	Immunoglobulin A1 protease	iga	533	Iga	Glycan biosynthesis and metabolism	Glycan biosynthesis and metabolism - Other	Cellwall	1963
gi|116076022	SPD_1019	A0A0H2ZLM5	Ribosome biogenesis GTPase A	rbgA	534	RbgA	Protein synthesis	Protein synthesis - Other	Membrane	283
gi|116076550	SPD_1020	Q04KF4	Ribonuclease HII	rnhB	534	RnhB	DNA metabolism	DNA replication, recombination and repair	Unknown	259
gi|116077724	SPD_1021	A0A0H2ZRM2	Voltage-gated chloride channel family protein	SPD_1021	534	SPD_1021	Transport and binding proteins	Cations and iron carrying compounds	Membrane	516
gi|116077538	SPD_1022	A0A0H2ZR93	Uncharacterized protein	SPD_1022	535	SPD_1022	Unknown function	Unknown function	Unknown	37
gi|116076740	SPD_1023	Q04KF1	Tyrosine recombinase XerS	xerS	536	XerS	DNA metabolism	DNA replication, recombination and repair	Cytoplasmic	356
gi|116077327	SPD_1024	A0A0H2ZP81	Lipoate-protein ligase, putative	lplA	537	LplA	Protein fate	Protein modification and repair	Cytoplasmic	329
gi|116076228	SPD_1025	A0A0H2ZLP5	Dihydrolipoamide dehydrogenase	lpdA	537	LpdA	Carbohydrate metabolism	Glycolysis / Gluconeogenesis	Cytoplasmic	561
gi|116075983	SPD_1026	A0A0H2ZLY0	Acetoin dehydrogenase complex, E2 component, dihydrolipoamide acetyltransferase, putative	pdhC	537	PdhC	Carbohydrate metabolism	Glycolysis / Gluconeogenesis	Cytoplasmic	347
gi|116077317	SPD_1027	A0A0H2ZQ55	Acetoin dehydrogenase, E1 component, beta subunit, putative	pdhB	537	PdhB	Carbohydrate metabolism	Glycolysis / Gluconeogenesis	Cytoplasmic	330
gi|116076780	SPD_1028	A0A0H2ZN82	TPP-dependent acetoin dehydrogenase alpha-subunit	acoA	537	AcoA	Carbohydrate metabolism	Glycolysis / Gluconeogenesis	Cytoplasmic	322
gi|116077642	SPD_1029	A0A0H2ZRK2	MATE efflux family protein	SPD_1029	538	SPD_1029	Transport and binding proteins	Other transport and binding proteins	Membrane	453
gi|116076386	SPD_1030	A0A0H2ZM00	Dihydroorotase	pyrC	539	PyrC	Nucleotide metabolism	Pyrimidine metabolism	Cytoplasmic	422
gi|116076244	SPD_1031	A0A0H2ZN52	Mutator mutT protein (7,8-dihydro-8-oxoguanine-triphosphatase) (8-oxo-dGTPase)	mutX	539	MutX	DNA metabolism	DNA replication, recombination and repair	Cytoplasmic	154
gi|116077297	SPD_1032	Q04KE2	Uracil-DNA glycosylase	ung	539	Ung	DNA metabolism	DNA replication, recombination and repair	Cytoplasmic	217
gi|116075946	SPD_1033	A0A0H2ZL46	Uncharacterized protein	SPD_1033	540	SPD_1033	Unknown function	Unknown function	Cytoplasmic	215
gi|116077030	SPD_1034	A0A0H2ZPD2	Hydrolase, haloacid dehalogenase-like family protein	SPD_1034	540	SPD_1034	Unknown function	Enzymes of unknown specificity	Cytoplasmic	237
gi|116076824	SPD_1035	A0A0H2ZP93	Uncharacterized protein	SPD_1035	541	SPD_1035	Unknown function	Unknown function	Unknown	52
gi|116077496	SPD_1036	A0A0H2ZPT9	Uncharacterized protein	SPD_1036	542	SPD_1036	Transport and binding proteins	Carbohydrates, organic alcohols and acids	Unknown	50
gi|116076416	SPD_1037	A0A0H2ZNB0	Histidine triad protein	SPD_1037	543	SPD_1037	Cellular processes	Pathogenesis	Unknown	844
gi|116077580	SPD_1038	A0A0H2ZRF0	Pneumococcal histidine triad protein A	phpA	544	PhpA	Cellular processes	Pathogenesis	Unknown	816
gi|116076459	SPD_1039	A0A0H2ZMY1	Phosphoenolpyruvate-protein phosphotransferase	ptsI	545	PtsI	Transport and binding proteins	Carbohydrates, organic alcohols and acids	Cytoplasmic	577
gi|116077289	SPD_1040	A0A0H2ZP52	Phosphocarrier protein HPr	ptsH	545	PtsH	Transport and binding proteins	Carbohydrates, organic alcohols and acids	Cytoplasmic	87
gi|116077517	SPD_1041	A0A0H2ZQM2	Glutaredoxin-like protein NrdH	nrdH	546	NrdH	Energy metabolism	Electron transport	Unknown	72
gi|116076649	SPD_1042	A0A0H2ZNG8	Ribonucleoside-diphosphate reductase	nrdE	546	NrdE	Nucleotide metabolism	Purine metabolism	Cytoplasmic	719
gi|116077738	SPD_1043	A0A0H2ZQ78	Ribonucleoside-diphosphate reductase subunit beta	nrdF	546	NrdF	Nucleotide metabolism	Purine metabolism	Unknown	320
gi|116077042	SPD_1044	A0A0H2ZPE4	Lactose phosphotransferase system repressor	lacR2	547	LacR2	Transcription	Transcription factor	Cytoplasmic	253
gi|116076238	SPD_1045	A0A0H2ZN47	Uncharacterized protein	SPD_1045	548	SPD_1045	Unknown function	Unknown function	Unknown	61
gi|116077254	SPD_1046	A0A0H2ZPZ8	6-phospho-beta-galactosidase	lacG-2	548	LacG-2	Carbohydrate metabolism	Galactose metabolism	Cytoplasmic	468
gi|116076166	SPD_1047	A0A0H2ZLK0	PTS system, lactose-specific IIBC components	lacE-2	548	LacE-2	Transport and binding proteins	Carbohydrates, organic alcohols and acids	Membrane	563
gi|116077175	SPD_1048	A0A0H2ZP74	PTS system, lactose-specific IIA component	lacF-2	548	LacF-2	Transport and binding proteins	Carbohydrates, organic alcohols and acids	Cytoplasmic	105
gi|116077787	SPD_1049	A0A0H2ZS04	Transcription antiterminator LacT	lacT	548	LacT	Transcription	Transcription factor	Cytoplasmic	278
gi|116076944	SPD_1050	A0A0H2ZP48	Tagatose 1,6-diphosphate aldolase	lacD	549	LacD	Carbohydrate metabolism	Galactose metabolism	Cytoplasmic	326
gi|116076615	SPD_1051	Q04KC3	Tagatose-6-phosphate kinase	lacC	549	LacC	Carbohydrate metabolism	Galactose metabolism	Cytoplasmic	309
gi|116077705	SPD_1052	Q04KC2	Galactose-6-phosphate isomerase subunit LacB	lacB	549	LacB	Carbohydrate metabolism	Galactose metabolism	Cytoplasmic	171
gi|116076466	SPD_1053	Q04KC1	Galactose-6-phosphate isomerase subunit LacA	lacA	549	LacA	Carbohydrate metabolism	Galactose metabolism	Cytoplasmic	141
gi|116077476	SPD_1054	A0A0H2ZQH5	Uncharacterized protein	SPD_1054	550	SPD_1054	Carbohydrate metabolism	Amino sugar and nucleotide sugar metabolism	Cytoplasmic	114
gi|116077123	SPD_1057	A0A0H2ZQ54	PTS system, IIB component, putative	gatB	553	GatB	Transport and binding proteins	Carbohydrates, organic alcohols and acids	Cytoplasmic	100
gi|116077363	SPD_1059	A0A0H2ZQS3	Uncharacterized protein	SPD_1059	555	SPD_1059	Unknown function	Unknown function	Unknown	50
gi|116076804	SPD_1060	Q04KB7	Elongation factor 4	lepA	556	LepA	Unknown function	General	Membrane	607
gi|116077043	SPD_1061	A0A0H2ZPY2	Serine/threonine protein phosphatase	SPD_1061	557	SPD_1061	Unknown function	Unknown function	Cytoplasmic	242
gi|116077413	SPD_1062	A0A0H2ZQS2	DNA repair protein RecN	recN	557	RecN	DNA metabolism	DNA replication, recombination and repair	Cytoplasmic	555
gi|116076319	SPD_1063	A0A0H2ZLV7	Arginine repressor	argR	557	ArgR	Amino acid metabolism	Arginine and proline metabolism	Cytoplasmic	143
gi|116077418	SPD_1064	A0A0H2ZPG8	Hemolysin-like protein, putative	SPD_1064	557	SPD_1064	Cellular processes	Pathogenesis	Cytoplasmic	271
gi|116076580	SPD_1065	A0A0H2ZMT5	Geranyltranstransferase	ispA	557	IspA	Metabolism of terpenoids and polyketides	Terpenoid backbone biosynthesis	Cytoplasmic	291
gi|116077100	SPD_1066	Q04KB1	Exodeoxyribonuclease 7 small subunit	xseB	557	XseB	DNA metabolism	Degradation of DNA	Cytoplasmic	70
gi|116076036	SPD_1067	Q04KB0	Exodeoxyribonuclease 7 large subunit	xseA	557	XseA	DNA metabolism	Degradation of DNA	Cytoplasmic	446
gi|116076915	SPD_1068	Q04KA9	Uridine kinase	udk	558	Udk	Nucleotide metabolism	Pyrimidine metabolism	Cytoplasmic	212
gi|116076248	SPD_1069	A0A0H2ZME9	Uncharacterized protein	SPD_1069	559	SPD_1069	Cellular processes	Adaptations to atypical conditions	Unknown	100
gi|116076304	SPD_1070	Q04KA7	tRNA pseudouridine synthase B	truB	560	TruB	Protein synthesis	tRNA and rRNA base modification	Cytoplasmic	292
gi|116077145	SPD_1071	A0A0H2ZQ71	Uncharacterized protein	SPD_1071	561	SPD_1071	Unknown function	Unknown function	Cytoplasmic	1061
gi|116076522	SPD_1072	A0A0H2ZNJ9	Uncharacterized protein	SPD_1072	561	SPD_1072	Unknown function	Unknown function	Unknown	424
gi|116077383	SPD_1073	A0A0H2ZQP5	O-acetylhomoserine aminocarboxypropyltransferase/cysteine synthase	SPD_1073	562	SPD_1073	Amino acid metabolism	Cysteine and methionine metabolism	Cytoplasmic	371
gi|116077460	SPD_1074	A0A0H2ZPK5	Uncharacterized protein	SPD_1074	562	SPD_1074	Amino acid metabolism	Cysteine and methionine metabolism	Unknown	40
gi|116076728	SPD_1075	A0A0H2ZP85	Transporter, FNT family protein, putative	SPD_1075	563	SPD_1075	Unknown function	Unknown function	Membrane	265
gi|116076094	SPD_1076	A0A0H2ZM58	Sortase	srtA	564	SrtA	Protein fate	Protein and peptide secretion and trafficking	Unknown	247
gi|116077252	SPD_1077	A0A0H2ZP22	DNA gyrase subunit A	gyrA	564	GyrA	DNA metabolism	DNA replication, recombination and repair	Cytoplasmic	822
gi|116076178	SPD_1078	Q04K99	L-lactate dehydrogenase	ldh	565	Ldh	Carbohydrate metabolism	Glycolysis / Gluconeogenesis	Cytoplasmic	328
gi|116076951	SPD_1079	A0A0H2ZPQ1	Type II restriction endonuclease, putative	SPD_1079	566	SPD_1079	Unknown function	Unknown function	Cytoplasmic	1084
gi|116076355	SPD_1080	A0A0H2ZLY1	Type II restriction endonuclease, putative	SPD_1080	567	SPD_1080	Unknown function	Unknown function	Unknown	623
gi|116076785	SPD_1081	A0A0H2ZN86	Uncharacterized protein	SPD_1081	568	SPD_1081	Cellular processes	Toxin production and resistance	Cytoplasmic	84
gi|116077619	SPD_1082	A0A0H2ZRH8	Uncharacterized protein	SPD_1082	568	SPD_1082	Cellular processes	Toxin production and resistance	Cytoplasmic	100
gi|116077380	SPD_1083	A0A0H2ZQT7	VicX protein	vicX	568	VicX	Signal transduction	Two-component system	Cytoplasmic	269
gi|116076498	SPD_1084	A0A0H2ZNH9	Sensory box sensor histidine kinase	vicK	568	VicK	Signal transduction	Two-component system	Membrane	449
gi|116076226	SPD_1085	A0A0H2ZN37	DNA-binding response regulator	vicR	568	VicR	Signal transduction	Two-component system	Cytoplasmic	234
gi|116077246	SPD_1086	A0A0H2ZP17	A/G-specific adenine glycosylase	mutY	568	MutY	DNA metabolism	DNA replication, recombination and repair	Cytoplasmic	391
gi|116077621	SPD_1087	Q04K90	Formate--tetrahydrofolate ligase	fhs	569	Fhs	Metabolism of cofactors and vitamins	One carbon pool by folate	Cytoplasmic	556
gi|116076752	SPD_1088	A0A0H2ZPA4	Phosphopantothenate--cysteine ligase	coaB	570	CoaB	Metabolism of cofactors and vitamins	Pantothenate and CoA biosynthesis	Cytoplasmic	229
gi|116076897	SPD_1089	A0A0H2ZNH6	Phosphopantothenoylcysteine decarboxylase	coaC	570	CoaC	Metabolism of cofactors and vitamins	Pantothenate and CoA biosynthesis	Unknown	183
gi|116076085	SPD_1090	A0A0H2ZML4	Membrane protein, putative	panT	570	PanT	Transport and binding proteins	Carbohydrates, organic alcohols and acids	Membrane	187
gi|116076354	SPD_1091	A0A0H2ZM93	Membrane protein, putative	niaX	571	NiaX	Transport and binding proteins	Carbohydrates, organic alcohols and acids	Membrane	175
gi|116077003	SPD_1092	A0A0H2ZNF2	MutT/nudix family protein	SPD_1092	572	SPD_1092	Unknown function	Unknown function	Cytoplasmic	155
gi|116076596	SPD_1093	A0A0H2ZND1	Transcriptional regulator, biotin repressor family protein	niaR	571	NiaR	Amino acid metabolism	Glycine, serine and threonine metabolism	Cytoplasmic	171
gi|116077135	SPD_1094	A0A0H2ZNR3	Acetyltransferase, GNAT family protein	SPD_1094	572	SPD_1094	Unknown function	Unknown function	Cytoplasmic	162
gi|116077712	SPD_1095	A0A0H2ZRL2	Uncharacterized protein	SPD_1095	572	SPD_1095	Unknown function	Unknown function	Unknown	187
gi|116077062	SPD_1096	Q04K81	UvrABC system protein B	uvrB	572	UvrB	DNA metabolism	DNA replication, recombination and repair	Cytoplasmic	662
gi|116076374	SPD_1097	A0A0H2ZLZ1	CAAX amino terminal protease family protein	SPD_1097	573	SPD_1097	Unknown function	Unknown function	Membrane	317
gi|116077508	SPD_1098	A0A0H2ZPN9	Amino acid ABC transporter, amino acid-binding protein/permease protein	SPD_1098	574	SPD_1098	Transport and binding proteins	Amino acids, peptides and amines	Membrane	721
gi|116077108	SPD_1099	A0A0H2ZPL5	Amino acid ABC transporter, ATP-binding protein	SPD_1099	574	SPD_1099	Transport and binding proteins	Amino acids, peptides and amines	Membrane	246
gi|116076353	SPD_1100	A0A0H2ZNC9	Glucose-6-phosphate 1-dehydrogenase	zwf	575	Zwf	Carbohydrate metabolism	Pentose phosphate pathway	Cytoplasmic	495
gi|116076974	SPD_1101	A0A0H2ZPS0	Signal recognition particle receptor FtsY	ftsY	576	FtsY	Protein fate	Protein and peptide secretion and trafficking	Membrane	425
gi|116076014	SPD_1102	A0A0H2ZLM0	Cof family protein	SPD_1102	576	SPD_1102	Unknown function	Enzymes of unknown specificity	Cytoplasmic	272
gi|116077551	SPD_1103	A0A0H2ZR64	Cof family protein	SPD_1103	576	SPD_1103	Unknown function	Enzymes of unknown specificity	Cytoplasmic	264
gi|116076482	SPD_1104	A0A0H2ZNG5	Chromosome partition protein Smc	smc	576	Smc	DNA metabolism	Chromosome-associated proteins	Cytoplasmic	1179
gi|116077648	SPD_1105	Q04K72	Ribonuclease 3	rnc	576	Rnc	Transcription	RNA processing	Cytoplasmic	232
gi|116076841	SPD_1107	Q04K71	GMP reductase	guaC	578	GuaC	Nucleotide metabolism	Purine metabolism	Cytoplasmic	328
gi|116077153	SPD_1108	A0A0H2ZQ67	Uncharacterized protein	SPD_1108	579	SPD_1108	Unknown function	Unknown function	Cytoplasmic	438
gi|116076170	SPD_1109	A0A0H2ZLX9	Endonuclease, putative	SPD_1109	579	SPD_1109	Unknown function	Unknown function	Cytoplasmic	643
gi|116077270	SPD_1110	A0A0H2ZQ15	Uncharacterized protein	SPD_1110	580	SPD_1110	Protein synthesis	Translation factors	Unknown	53
gi|116076572	SPD_1111	A0A0H2ZMT1	Uncharacterized protein	SPD_1111	580	SPD_1111	Unknown function	Unknown function	Unknown	57
gi|116077073	SPD_1112	A0A0H2ZPX1	Uncharacterized protein	SPD_1112	581	SPD_1112	Unknown function	Unknown function	Cytoplasmic	47
gi|116076159	SPD_1113	A0A0H2ZLX2	3-isopropylmalate dehydratase small subunit, putative	leuD	582	LeuD	Amino acid metabolism	Valine, leucine and isoleucine biosynthesis	Cytoplasmic	119
gi|116076515	SPD_1114	A0A0H2ZNJ4	Uncharacterized protein	SPD_1114	583	SPD_1114	Unknown function	Unknown function	Unknown	37
gi|116077427	SPD_1115	A0A0H2ZQY3	3-isopropylmalate dehydrogenase	leuB	584	LeuB	Amino acid metabolism	Valine, leucine and isoleucine biosynthesis	Cytoplasmic	345
gi|116076560	SPD_1117	A0A0H2ZNW7	Uncharacterized protein	SPD_1117	586	SPD_1117	Unknown function	Unknown function	Cytoplasmic	218
gi|116077437	SPD_1118	A0A0H2ZQU4	Copper homeostasis protein CutC	cutC	586	CutC	Transport and binding proteins	Cations and iron carrying compounds	Cytoplasmic	210
gi|116076249	SPD_1119	A0A0H2ZN57	Uncharacterized protein	SPD_1119	587	SPD_1119	Unknown function	Unknown function	Membrane	119
gi|116077191	SPD_1120	A0A0H2ZPV8	DNA topoisomerase 1	topA	588	TopA	DNA metabolism	DNA replication, recombination and repair	Cytoplasmic	695
gi|116076132	SPD_1121	A0A0H2ZMP8	Membrane protein, putative	SPD_1121	589	SPD_1121	Unknown function	Unknown function	Membrane	347
gi|116076976	SPD_1122	A0A0H2ZNN5	DNA processing protein DprA, putative	SPD_1122	590	SPD_1122	Cellular processes	DNA transformation	Cytoplasmic	282
gi|116076260	SPD_1123	A0A0H2ZN66	CTP:phosphocholine cytidylyltransferase	licC	591	LicC	Unknown function	Unknown function	Cytoplasmic	229
gi|116077118	SPD_1124	A0A0H2ZNP8	Protein LicB	licB	591	LicB	Unknown function	Unknown function	Membrane	292
gi|116076122	SPD_1125	A0A0H2ZMW1	Choline kinase	pck	591	Pck	Unknown function	Unknown function	Cytoplasmic	289
gi|116076891	SPD_1126	A0A0H2ZPK4	Alcohol dehydrogenase, zinc-containing	tarJ	591	TarJ	Carbohydrate metabolism	Pentose and glucuronate interconversions	Cytoplasmic	340
gi|116077679	SPD_1127	Q04K52	2-C-methyl-D-erythritol 4-phosphate cytidylyltransferase	ispD	591	IspD	Metabolism of terpenoids and polyketides	Terpenoid backbone biosynthesis	Cytoplasmic	235
gi|116076817	SPD_1128	A0A0H2ZNA7	Polysaccharide biosynthesis protein, putative	SPD_1128	592	SPD_1128	Unknown function	Unknown function	Membrane	495
gi|116077434	SPD_1129	A0A0H2ZPP8	Phosphotransferase LicD1	licD1	592	LicD1	Unknown function	Unknown function	Cytoplasmic	267
gi|116076551	SPD_1130	A0A0H2ZMN9	Phosphotransferase LicD2	licD2	592	LicD2	Unknown function	Unknown function	Cytoplasmic	269
gi|116077077	SPD_1131	Q04K48	Carbamoyl-phosphate synthase large chain	carB	593	CarB	Nucleotide metabolism	Pyrimidine metabolism	Cytoplasmic	1058
gi|116075950	SPD_1132	A0A0H2ZLH6	Carbamoyl-phosphate synthase small chain	carA	593	CarA	Nucleotide metabolism	Pyrimidine metabolism	Cytoplasmic	359
gi|116077395	SPD_1133	Q04K46	Aspartate carbamoyltransferase	pyrB	593	PyrB	Nucleotide metabolism	Pyrimidine metabolism	Cytoplasmic	307
gi|116076284	SPD_1134	Q04K45	Bifunctional protein PyrR	pyrR	593	PyrR	Nucleotide metabolism	Pyrimidine metabolism	Cytoplasmic	173
gi|116076611	SPD_1135	A0A0H2ZMI5	Endonuclease III	nth	594	Nth	DNA metabolism	DNA replication, recombination and repair	Membrane	209
gi|116077337	SPD_1136	A0A0H2ZQ69	Uncharacterized ACR	SPD_1136	594	SPD_1136	Unknown function	Unknown function	Cytoplasmic	180
gi|116077767	SPD_1137	A0A0H2ZRU3	ABC transporter, ATP-binding protein	SPD_1137	595	SPD_1137	Unknown function	Unknown function	Cytoplasmic	519
gi|116076633	SPD_1138	Q04K41	Protease HtpX homolog	htpX	596	HtpX	Protein fate	Degradation of proteins, peptides and glycopeptides	Membrane	299
gi|116076579	SPD_1139	A0A0H2ZNX9	LemA protein	lemA	596	LemA	Unknown function	Unknown function	Unknown	186
gi|116077409	SPD_1140	Q04K39	Ribosomal RNA small subunit methyltransferase G	gidB	597	GidB	Protein synthesis	tRNA and rRNA base modification	Unknown	237
gi|116076610	SPD_1141	A0A0H2ZMV8	Uracil-xanthine permease	uraA	598	UraA	Transport and binding proteins	Nucleosides, purines and pyrimidines	Membrane	427
gi|116076227	SPD_1142	A0A0H2ZM11	Signal recognition particle protein	ffh	599	Ffh	Protein fate	Protein and peptide secretion and trafficking	Membrane	523
gi|116076127	SPD_1143	Q04K36	UPF0122 protein SPD	SPD_1143	599	SPD_1143	Unknown function	Unknown function	Cytoplasmic	110
gi|116076935	SPD_1144	A0A0H2ZNK7	Uncharacterized protein	SPD_1144	600	SPD_1144	Protein synthesis	Ribosomal proteins	Unknown	125
gi|116076671	SPD_1145	A0A0H2ZNW6	Uncharacterized protein	SPD_1145	601	SPD_1145	Unknown function	Unknown function	Cytoplasmic	434
gi|116077498	SPD_1146	A0A0H2ZR06	Cof family protein	SPD_1146	601	SPD_1146	Unknown function	Enzymes of unknown specificity	Cytoplasmic	268
gi|116076761	SPD_1148	Q04K32	50S ribosomal protein L19	rplS	602	RplS	Protein synthesis	Ribosomal proteins	Cytoplasmic	115
gi|116076502	SPD_1149	A0A0H2ZMJ4	Putative fluoride ion transporter CrcB	crcB1	603	CrcB1	Transport and binding proteins	Anions	Membrane	109
gi|116077371	SPD_1150	A0A0H2ZQN3	Putative fluoride ion transporter CrcB	crcB2	603	CrcB2	Transport and binding proteins	Anions	Membrane	124
gi|116077225	SPD_1151	A0A0H2ZPA2	Chorismate mutase	aroA	603	AroA	Amino acid metabolism	Phenylalanine, tyrosine and tryptophan biosynthesis	Cytoplasmic	88
gi|116077575	SPD_1152	A0A0H2ZRE4	Flavodoxin	fld	604	Fld	Energy metabolism	Electron transport	Cytoplasmic	147
gi|116076986	SPD_1153	A0A0H2ZNP2	DHH subfamily 1 protein	SPD_1153	605	SPD_1153	Unknown function	Unknown function	Cytoplasmic	311
gi|116076340	SPD_1154	Q04K26	50S ribosomal protein L31 type B	rpmE2	606	RpmE2	Protein synthesis	Ribosomal proteins	Cytoplasmic	80
gi|116077248	SPD_1155	A0A0H2ZPZ4	Uncharacterized protein	SPD_1155	607	SPD_1155	Unknown function	Unknown function	Membrane	192
gi|116076602	SPD_1156	A0A0H2ZND6	Dyp-type peroxidase family protein	SPD_1156	607	SPD_1156	Unknown function	Unknown function	Extracellular	334
gi|116077423	SPD_1157	A0A0H2ZPH3	Uncharacterized protein	SPD_1157	607	SPD_1157	Unknown function	Unknown function	Cytoplasmic	88
gi|116077541	SPD_1158	A0A0H2ZR49	Glutamate dehydrogenase	gdhA	608	GdhA	Amino acid metabolism	Alanine, aspartate and glutamate metabolism	Cytoplasmic	448
gi|116076473	SPD_1159	A0A0H2ZNM4	Uncharacterized protein	SPD_1159	609	SPD_1159	Unknown function	Unknown function	Membrane	56
gi|116077072	SPD_1160	A0A0H2ZNL0	ABC transporter, ATP-bindng protein	SPD_1160	609	SPD_1160	Transport and binding proteins	Unknown substrate	Membrane	213
gi|116076731	SPD_1161	A0A0H2ZMS5	Uncharacterized protein	SPD_1161	610	SPD_1161	Unknown function	Unknown function	Cytoplasmic	145
gi|116077310	SPD_1162	A0A0H2ZQM5	Uncharacterized protein	SPD_1162	611	SPD_1162	Unknown function	Unknown function	Unknown	67
gi|116075995	SPD_1163	A0A0H2ZLY9	N-acetylneuraminate lyase, putative	nanA	611	SPD_1163	Carbohydrate metabolism	Amino sugar and nucleotide sugar metabolism	Cytoplasmic	243
gi|116077094	SPD_1164	A0A0H2ZNN0	Cytidine deaminase	cdd-2	612	Cdd-2	Nucleotide metabolism	Pyrimidine metabolism	Unknown	135
gi|116076060	SPD_1165	A0A0H2ZM35	Uncharacterized protein	SPD_1165	613	SPD_1165	Unknown function	Unknown function	Membrane	162
gi|116076405	SPD_1166	A0A0H2ZMT6	Uncharacterized protein	SPD_1166	613	SPD_1166	Unknown function	Unknown function	Cytoplasmic	469
gi|116076282	SPD_1167	A0A0H2ZN10	ABC transporter, ATP-binding protein	gsiA	613	GsiA	Transport and binding proteins	Amino acids, peptides and amines	Membrane	660
gi|116076347	SPD_1168	A0A0H2ZM90	Oligopeptide ABC transporter , pemease protein	appC	613	AppC	Transport and binding proteins	Amino acids, peptides and amines	Membrane	283
gi|116077232	SPD_1169	A0A0H2ZP07	Oligopeptide ABC transporter, permease protein	appB	613	AppB	Transport and binding proteins	Amino acids, peptides and amines	Membrane	316
gi|116075915	SPD_1170	A0A0H2ZM44	Oligopeptide ABC transporter,oligopeptide-binding protein	gsiB	613	GsiB	Transport and binding proteins	Amino acids, peptides and amines	Cellwall	542
gi|116077209	SPD_1171	A0A0H2ZP95	Uncharacterized protein	SPD_1171	614	SPD_1171	Unknown function	Unknown function	Cytoplasmic	307
gi|116077057	SPD_1172	A0A0H2ZPZ3	Putative N-acetylmannosamine-6-phosphate 2-epimerase	nanE-2	614	NanE-2	Carbohydrate metabolism	Amino sugar and nucleotide sugar metabolism	Cytoplasmic	232
gi|116077791	SPD_1174	A0A0H2ZRJ7	Uncharacterized protein	SPD_1174	616	SPD_1174	Transport and binding proteins	Other transport and binding proteins	Unknown	73
gi|116075948	SPD_1175	A0A0H2ZLV5	Membrane protein, putative	SPD_1175	617	SPD_1175	Unknown function	Unknown function	Membrane	439
gi|116076618	SPD_1176	A0A0H2ZMW2	ABC transporter, ATP-binding protein	SPD_1176	617	SPD_1176	Transport and binding proteins	Unknown substrate	Membrane	246
gi|116077697	SPD_1177	A0A0H2ZQ53	Drug efflux ABC transporter, ATP-binding/permease protein	SPD_1177	617	SPD_1177	Transport and binding proteins	Other transport and binding proteins	Membrane	535
gi|116077183	SPD_1178	A0A0H2ZPV3	Prolyl oligopeptidase family protein	SPD_1178	617	SPD_1178	Unknown function	Unknown function	Membrane	646
gi|116076259	SPD_1179	A0A0H2ZMF7	Uncharacterized protein	SPD_1179	617	SPD_1179	Unknown function	Unknown function	Cytoplasmic	869
gi|116076271	SPD_1180	A0A0H2ZMG5	CAAX amino terminal protease family protein	SPD_1180	618	SPD_1180	Unknown function	Unknown function	Membrane	195
gi|116076592	SPD_1181	A0A0H2ZMU5	Uncharacterized protein	SPD_1181	619	SPD_1181	Unknown function	Unknown function	Membrane	47
gi|116077456	SPD_1182	A0A0H2ZQF6	Uncharacterized protein	spxA_1	619	SpxA_1	Cellular processes	Adaptations to atypical conditions	Cytoplasmic	126
gi|116076865	SPD_1183	A0A0H2ZN32	Uncharacterized protein	SPD_1183	619	SPD_1183	Unknown function	Unknown function	Cytoplasmic	92
gi|116076483	SPD_1184	A0A0H2ZN06	Uncharacterized protein	SPD_1184	620	SPD_1184	DNA metabolism	DNA replication, recombination and repair	Unknown	84
gi|116077511	SPD_1185	A0A0H2ZR67	Uncharacterized protein	SPD_1185	621	SPD_1185	Unknown function	Unknown function	Cytoplasmic	57
gi|116076196	SPD_1186	A0A0H2ZMU7	Uncharacterized protein	SPD_1186	622	SPD_1186	Unknown function	Unknown function	Membrane	60
gi|116077197	SPD_1187	Q04JZ4	50S ribosomal protein L7/L12	rplL	623	RplL	Protein synthesis	Ribosomal proteins	Cytoplasmic	122
gi|116077226	SPD_1188	Q04JZ3	50S ribosomal protein L10	rplJ	623	RplJ	Protein synthesis	Ribosomal proteins	Cytoplasmic	166
gi|116077351	SPD_1189	A0A0H2ZQR0	Uncharacterized protein	SPD_1189	624	SPD_1189	Unknown function	Unknown function	Membrane	74
gi|116076083	SPD_1190	A0A0H2ZLS2	Atz/Trz family protein	mtaD	625	MtaD	Unknown function	Unknown function	Cytoplasmic	419
gi|116077125	SPD_1191	A0A0H2ZNQ2	ABC transporter, ATP-binding/permease protein	SPD_1191	626	SPD_1191	Transport and binding proteins	Unknown substrate	Membrane	583
gi|116076799	SPD_1192	A0A0H2ZMX8	ABC transporter, ATP-binding/permease protein	SPD_1192	626	SPD_1192	Transport and binding proteins	Other transport and binding proteins	Membrane	574
gi|116076939	SPD_1193	A0A0H2ZP44	Peptide methionine sulfoxide reductase msrA/msrB 1	msrAB1	626	MsrAB1	Cellular processes	Adaptations to atypical conditions	Cytoplasmic	312
gi|116077677	SPD_1194	Q04JY7	Homoserine kinase	thrB	627	ThrB	Amino acid metabolism	Glycine, serine and threonine metabolism	Cytoplasmic	289
gi|116076820	SPD_1195	A0A0H2ZNU7	Homoserine dehydrogenase	hom	627	Hom	Amino acid metabolism	Lysine biosynthesis	Cytoplasmic	428
gi|116076265	SPD_1196	Q04JY5	Adapter protein MecA	mecA	628	MecA	Protein fate	Degradation of proteins, peptides and glycopeptides	Cytoplasmic	245
gi|116076590	SPD_1197	A0A0H2ZNC6	Uncharacterized protein	SPD_1197	629	SPD_1197	Unknown function	Unknown function	Unknown	344
gi|116076295	SPD_1198	A0A0H2ZMI6	Membrane protein, putative	SPD_1198	630	SPD_1198	Unknown function	Unknown function	Membrane	477
gi|116077336	SPD_1199	A0A0H2ZQJ6	Glycosyl transferase, group 2 family protein	SPD_1199	631	SPD_1199	Carbohydrate metabolism	Fructose and mannose metabolism	Membrane	328
gi|116077151	SPD_1200	A0A0H2ZP56	Glycosyl transferase, group 1 family protein	SPD_1200	631	SPD_1200	Carbohydrate metabolism	Fructose and mannose metabolism	Cytoplasmic	366
gi|116076329	SPD_1201	A0A0H2ZNB4	Phosphotransferase LicD3	licD3	631	LicD3	Unknown function	Unknown function	Cytoplasmic	281
gi|116076793	SPD_1202	A0A0H2ZMX3	Psr protein	psr	632	Psr	Unknown function	Unknown function	Membrane	424
gi|116076049	SPD_1203	A0A0H2ZM27	Prephenate dehydratase	pheA2	632	PheA2	Amino acid metabolism	Phenylalanine, tyrosine and tryptophan biosynthesis	Cytoplasmic	282
gi|116077646	SPD_1204	A0A0H2ZQ07	Shikimate kinase	aroK	632	AroK	Amino acid metabolism	Phenylalanine, tyrosine and tryptophan biosynthesis	Unknown	158
gi|116076465	SPD_1205	Q04JX6	3-phosphoshikimate 1-carboxyvinyltransferase	aroA	632	AroA	Amino acid metabolism	Phenylalanine, tyrosine and tryptophan biosynthesis	Cytoplasmic	427
gi|116075936	SPD_1206	Q04JX5	UPF0342 protein SPD	SPD_1206	633	SPD_1206	Unknown function	Unknown function	Cytoplasmic	112
gi|116076791	SPD_1207	A0A0H2ZN90	Prephenate dehydrogenase	tyrA	633	TyrA	Amino acid metabolism	Phenylalanine, tyrosine and tryptophan biosynthesis	Cytoplasmic	367
gi|116076593	SPD_1208	Q04JX3	Chorismate synthase	aroC	633	AroC	Amino acid metabolism	Phenylalanine, tyrosine and tryptophan biosynthesis	Cytoplasmic	388
gi|116077436	SPD_1209	Q04JX2	3-dehydroquinate synthase	aroB	633	AroB	Amino acid metabolism	Phenylalanine, tyrosine and tryptophan biosynthesis	Cytoplasmic	355
gi|116076612	SPD_1210	Q04JX1	Shikimate dehydrogenase	aroE	633	AroE	Amino acid metabolism	Phenylalanine, tyrosine and tryptophan biosynthesis	Cytoplasmic	284
gi|116077641	SPD_1211	Q04JX0	3-dehydroquinate dehydratase	aroD	633	AroD	Amino acid metabolism	Phenylalanine, tyrosine and tryptophan biosynthesis	Cytoplasmic	225
gi|116076758	SPD_1212	A0A0H2ZPA8	Uncharacterized protein	SPD_1212	633	SPD_1212	Unknown function	Unknown function	Unknown	390
gi|116077088	SPD_1213	A0A0H2ZNX0	Membrane protein, putative	SPD_1213	634	SPD_1213	Unknown function	Unknown function	Membrane	544
gi|116076011	SPD_1214	A0A0H2ZMF6	ABC transporter, ATP-binding protein	SPD_1214	634	SPD_1214	Transport and binding proteins	Cations and iron carrying compounds	Membrane	249
gi|116077093	SPD_1215	A0A0H2ZNX4	Alpha-amylase	amy	635	Amy	Carbohydrate metabolism	Starch and sucrose metabolism	Extracellular	484
gi|116076189	SPD_1216	Q04JW5	Alanine--tRNA ligase	alaS	636	AlAS	Protein synthesis	tRNA aminoacylation	Cytoplasmic	872
gi|116075990	SPD_1217	A0A0H2ZLY4	Uncharacterized protein	SPD_1217	636	SPD_1217	Unknown function	Unknown function	Cytoplasmic	161
gi|116076852	SPD_1218	A0A0H2ZN21	Spermidine/putrescine ABC transporter, spermidine/putrescine-binding protein	potD	637	PotD	Transport and binding proteins	Amino acids, peptides and amines	Unknown	356
gi|116077668	SPD_1219	A0A0H2ZR42	Spermidine/putrescine ABC transporter, permease protein	potC	637	PotC	Transport and binding proteins	Amino acids, peptides and amines	Membrane	257
gi|116076115	SPD_1220	A0A0H2ZMN7	Spermidine/putrescine ABC transporter, permease protein	potH	637	PotH	Transport and binding proteins	Amino acids, peptides and amines	Membrane	268
gi|116076975	SPD_1221	Q04JW0	Spermidine/putrescine import ATP-binding protein PotA	potA	637	PotA	Transport and binding proteins	Amino acids, peptides and amines	Membrane	385
gi|116076312	SPD_1222	Q04JV9	UDP-N-acetylenolpyruvoylglucosamine reductase	murB	637	MurB	Glycan biosynthesis and metabolism	Peptidoglycan biosynthesis	Cytoplasmic	316
gi|116076772	SPD_1223	A0A0H2ZPB7	Membrane protein, putative	SPD_1223	638	SPD_1223	Unknown function	Unknown function	Membrane	250
gi|116077402	SPD_1224	A0A0H2ZQB4	Alpha-acetolactate decarboxylase	budA	638	BudA	Carbohydrate metabolism	Butanoate metabolism	Cytoplasmic	243
gi|116076080	SPD_1225	A0A0H2ZML0	Uncharacterized protein	yjiR	639	YjiR	Transcription	Transcription factor	Cytoplasmic	423
gi|116077179	SPD_1226	A0A0H2ZQB5	Amino acid ABC transporter, amino acid-binding protein	SPD_1226	640	SPD_1226	Unknown function	Unknown function	Unknown	271
gi|116076385	SPD_1227	A0A0H2ZMB2	Phosphate-specific transport system accessory protein PhoU	phoU	641	PhoU2	Transport and binding proteins	Anions	Cytoplasmic	217
gi|116076997	SPD_1228	A0A0H2ZNE8	Phosphate import ATP-binding protein PstB	pstB2_2	641	PstB2_2	Transport and binding proteins	Anions	Membrane	252
gi|116076614	SPD_1229	A0A0H2ZNE6	Phosphate import ATP-binding protein PstB	pstB2_1	641	PstB2_1	Transport and binding proteins	Anions	Membrane	267
gi|116077397	SPD_1230	A0A0H2ZQV6	Phosphate ABC transporter, permease protein, putative	pstA2	641	PstA2	Transport and binding proteins	Anions	Membrane	294
gi|116076849	SPD_1231	A0A0H2ZPH4	Phosphate ABC transporter, permease protein, putative	pstC2	641	PstC2	Transport and binding proteins	Anions	Membrane	305
gi|116077661	SPD_1232	A0A0H2ZRH2	Phosphate ABC transporter, phosphate-binding protein, putative	pstS2	641	PstS2	Transport and binding proteins	Anions	Membrane	292
gi|116076955	SPD_1233	A0A0H2ZP60	NOL1/NOP2/sun family protein	rsmF	642	RsmF	Unknown function	Unknown function	Cytoplasmic	434
gi|116075955	SPD_1234	A0A0H2ZMH9	Inositol monophosphatase family protein	suhB	642	SuhB	Carbohydrate metabolism	Inositol phosphate metabolism	Unknown	257
gi|116077052	SPD_1235	Q04JU6	UPF0223 protein SPD	SPD_1235	642	SPD_1235	Unknown function	Unknown function	Unknown	92
gi|116076232	SPD_1236	A0A0H2ZN42	Regulatory protein Spx	spx	642	Spx	Regulatory functions	DNA interactions	Cytoplasmic	133
gi|116076111	SPD_1237	A0A0H2ZM71	Membrane protein, putative	SPD_1237	643	SPD_1237	Unknown function	Unknown function	Membrane	205
gi|116077279	SPD_1238	A0A0H2ZP43	Hydrolase, haloacid dehalogenase-like family protein	hydrolase	643	Hydrolase	Xenobiotics biodegradation and metabolism	Aminobenzoate degradation	Cytoplasmic	257
gi|116076829	SPD_1239	A0A0H2ZN03	Acyl-ACP thioesterase, putative	MCH	643	MCH	Lipid metabolism	Fatty acid biosynthesis	Cytoplasmic	245
gi|116077632	SPD_1240	A0A0H2ZPZ5	Oxygen-independent coproporphyrinogen III oxidase, putative	hemN	643	HemN	Metabolism of cofactors and vitamins	Porphyrin and chlorophyll metabolism	Cytoplasmic	376
gi|116077264	SPD_1241	A0A0H2ZQC9	Uncharacterized protein	SPD_1241	644	SPD_1241	Unknown function	Unknown function	Unknown	129
gi|116075966	SPD_1242	A0A0H2ZLW8	Uncharacterized protein	SPD_1242	644	SPD_1242	Cellular processes	Adaptations to atypical conditions	Unknown	127
gi|116076500	SPD_1243	Q04JT8	Prolipoprotein diacylglyceryl transferase	lgt	644	Lgt	Protein fate	Protein modification and repair	Membrane	262
gi|116076185	SPD_1244	Q04JT7	HPr kinase/phosphorylase	hprK	644	HprK	Transport and binding proteins	Carbohydrates, organic alcohols and acids	Cytoplasmic	311
gi|116077671	SPD_1245	Q04JT6	30S ribosomal protein S21	rpsU	645	RpsU	Protein synthesis	Ribosomal proteins	Cytoplasmic	58
gi|116076798	SPD_1246	Q04JT5	Glucosamine-6-phosphate deaminase	nagB	646	NagB	Carbohydrate metabolism	Amino sugar and nucleotide sugar metabolism	Cytoplasmic	235
gi|116076261	SPD_1247	Q04JT4	S-adenosylmethionine:tRNA ribosyltransferase-isomerase	queA	647	QueA	Protein synthesis	tRNA and rRNA base modification	Cytoplasmic	342
gi|116077749	SPD_1248	A0A0H2ZRP5	Uncharacterized protein	SPD_1248	648	SPD_1248	Cellular processes	Pathogenesis	Unknown	129
gi|116076987	SPD_1249	A0A0H2ZND8	Hypothetical acetyltransferase	SPD_1249	649	SPD_1249	Unknown function	Unknown function	Cytoplasmic	183
gi|116076369	SPD_1250	Q04JT1	NH(3)-dependent NAD(+) synthetase	nadE	650	NadE	Metabolism of cofactors and vitamins	Nicotinate and nicotinamide metabolism	Cytoplasmic	274
gi|116076457	SPD_1251	A0A0H2ZM51	Nicotinate phosphoribosyltransferase	pncB	650	PncB	Metabolism of cofactors and vitamins	Nicotinate and nicotinamide metabolism	Cytoplasmic	486
gi|116077403	SPD_1252	A0A0H2ZQW1	Membrane protein, putative	SPD_1252	651	SPD_1252	Unknown function	Unknown function	Membrane	162
gi|116077595	SPD_1253	A0A0H2ZQV8	Transcriptional repressor, putative	SPD_1253	651	SPD_1253	Unknown function	Unknown function	Cytoplasmic	69
gi|116076458	SPD_1254	A0A0H2ZNE2	Membrane protein, putative	SPD_1254	652	SPD_1254	Unknown function	Unknown function	Membrane	242
gi|116076877	SPD_1255	A0A0H2ZPE3	ABC transporter, ATP-binding protein	SPD_1255	652	SPD_1255	Transport and binding proteins	Unknown substrate	Membrane	240
gi|116076026	SPD_1256	A0A0H2ZM09	Peptidase, U32 family protein	SPD_1256	653	SPD_1256	Unknown function	Unknown function	Cytoplasmic	241
gi|116077396	SPD_1257	A0A0H2ZQB1	Uncharacterized protein	SPD_1257	654	SPD_1257	Unknown function	Unknown function	Membrane	55
gi|116077300	SPD_1258	A0A0H2ZP62	Peptidase, U32 family protein	SPD_1258	655	SPD_1258	Unknown function	Unknown function	Cytoplasmic	428
gi|116077556	SPD_1260	A0A0H2ZR68	Type II DNA modification methyltransferase, putative	SPD_1260	657	SPD_1260	Unknown function	Unknown function	Cytoplasmic	392
gi|116077205	SPD_1261	A0A0H2ZPW8	Uncharacterized protein	SPD_1261	658	SPD_1261	Unknown function	Unknown function	Unknown	48
gi|116075895	SPD_1262	A0A0H2ZKX7	Transcriptional regulator, AraC family protein	soxS	659	SoxS	Transcription	Transcription factor	Cytoplasmic	330
gi|116076985	SPD_1263	A0A0H2ZPS8	ABC transporter, ATP-binding/permease protein	SPD_1263	660	SPD_1263	Transport and binding proteins	Unknown substrate	Membrane	584
gi|116076559	SPD_1264	A0A0H2ZNA5	ABC transporter, ATP-binding protein	SPD_1264	660	SPD_1264	Transport and binding proteins	Unknown substrate	Membrane	573
gi|116077630	SPD_1265	A0A0H2ZRI9	Membrane protein, putative	SPD_1265	661	SPD_1265	Unknown function	Unknown function	Membrane	194
gi|116076707	SPD_1266	A0A0H2ZN31	Membrane protein, putative	ecfT	662	EcfT_3	Transport and binding proteins	Other transport and binding proteins	Membrane	231
gi|116077158	SPD_1267	A0A0H2ZNV3	ABC transporter, ATP-binding protein	ecfA1	662	EcfA1_3	Transport and binding proteins	Other transport and binding proteins	Membrane	454
gi|116076253	SPD_1268	A0A0H2ZMF3	Uncharacterized protein	SPD_1268	663	SPD_1268	Unknown function	Unknown function	Cytoplasmic	153
gi|116077276	SPD_1269	A0A0H2ZQ20	Uncharacterized protein	SPD_1269	664	SPD_1269	Unknown function	Unknown function	Cytoplasmic	70
gi|116076377	SPD_1270	A0A0H2ZMP9	Uncharacterized protein	SPD_1270	664	SPD_1270	Unknown function	Unknown function	Cytoplasmic	101
gi|116077507	SPD_1271	A0A0H2ZPU9	Uncharacterized protein	SPD_1271	664	SPD_1271	Unknown function	Unknown function	Unknown	64
gi|116076654	SPD_1272	A0A0H2ZNV5	IS66 family element, Orf2	SPD_1272	665	SPD_1272	Unknown function	Unknown function	Unknown	116
gi|116077742	SPD_1273	A0A0H2ZQA3	IS66 family element, Orf1	SPD_1273	665	SPD_1273	Unknown function	Unknown function	Cytoplasmic	79
gi|116077050	SPD_1274	Q04JQ8	GMP synthase [glutamine-hydrolyzing]	guaA	666	GuaA	Nucleotide metabolism	Purine metabolism	Cytoplasmic	520
gi|116076044	SPD_1275	A0A0H2ZM22	Transcriptional regulator, GntR family protein	yvoA_1	667	YvoA_1	Signal transduction	Two-component system	Cytoplasmic	232
gi|116076927	SPD_1276	A0A0H2ZPJ2	Membrane protein, putative	yicL_1	668	YicL_1	Transport and binding proteins	Unknown substrate	Membrane	298
gi|116077136	SPD_1277	A0A0H2ZQ32	Uncharacterized protein	SPD_1277	668	SPD_1277	Unknown function	Unknown function	Unknown	312
gi|116076335	SPD_1278	A0A0H2ZNB9	C3-degrading proteinase	cppA	668	CppA	Cellular processes	Pathogenesis	Cytoplasmic	241
gi|116075900	SPD_1279	A0A0H2ZLB1	GDSL-like lipase/acylhydrolase, putative	SPD_1279	669	SPD_1279	Unknown function	Unknown function	Unknown	211
gi|116077271	SPD_1280	A0A0H2ZQI3	Cof family protein	SPD_1280	669	SPD_1280	Unknown function	Enzymes of unknown specificity	Cytoplasmic	275
gi|116076165	SPD_1281	A0A0H2ZLX5	Uncharacterized protein	capA	669	CapA	Cellular processes	Pathogenesis	Cytoplasmic	111
gi|116076487	SPD_1282	A0A0H2ZNH0	Uncharacterized protein	SPD_1282	669	SPD_1282	Cellular processes	Pathogenesis	Membrane	170
gi|116076941	SPD_1283	A0A0H2ZNL1	Uncharacterized protein	SPD_1283	670	SPD_1283	Unknown function	Unknown function	Unknown	40
gi|116076087	SPD_1284	A0A0H2ZM55	Uncharacterized protein	SPD_1284	671	SPD_1284	Unknown function	Unknown function	Unknown	37
gi|116076686	SPD_1285	Q04JP7	Peptide deformylase	def	672	Def	Protein fate	Protein modification and repair	Cytoplasmic	203
gi|116077391	SPD_1286	A0A0H2ZQV0	TrmH family RNA methyltransferase group 3	SPD_1286	672	SPD_1286	Protein synthesis	tRNA and rRNA base modification	Unknown	242
gi|116077488	SPD_1287	A0A0H2ZQI7	Thioredoxin reductase	trxB	673	TrxB	Energy metabolism	Electron transport	Cytoplasmic	303
gi|116076708	SPD_1288	A0A0H2ZMQ9	Uncharacterized protein	SPD_1288	674	SPD_1288	Transport and binding proteins	Amino acids, peptides and amines	Membrane	74
gi|116077285	SPD_1289	A0A0H2ZQE6	Amino acid ABC transporter, ATP-binding protein	tcyC	675	TcyC	Transport and binding proteins	Amino acids, peptides and amines	Membrane	247
gi|116076523	SPD_1290	A0A0H2ZN43	Amino acid ABC transporter, permease protein	SPD_1290	675	SPD_1290	Transport and binding proteins	Amino acids, peptides and amines	Membrane	266
gi|116076162	SPD_1291	A0A0H2ZMR7	ArsC family protein	SPD_1291	676	SPD_1291	Regulatory functions	DNA interactions	Cytoplasmic	118
gi|116077286	SPD_1292	A0A0H2ZQ30	Methylated-DNA--protein-cysteine S-methyltransferase	ogt	676	Ogt	DNA metabolism	DNA replication, recombination and repair	Unknown	176
gi|116075921	SPD_1293	A0A0H2ZLR0	Acetyltransferase, GNAT family protein	SPD_1293	676	SPD_1293	Unknown function	Unknown function	Cytoplasmic	164
gi|116077004	SPD_1294	A0A0H2ZPR7	Uncharacterized protein	SPD_1294	677	SPD_1294	Unknown function	Unknown function	Unknown	148
gi|116076339	SPD_1295	A0A0H2ZN55	Hemolysin	yqfA	678	YqfA	Cellular processes	Pathogenesis	Membrane	215
gi|116077468	SPD_1296	Q04JN6	Glutamine amidotransferase subunit PdxT	SPD_1296	679	SPD_1296	Metabolism of cofactors and vitamins	Pyridoxinemetabolism	Membrane	193
gi|116076328	SPD_1297	Q04JN5	Pyridoxal biosynthesis lyase PdxS	SPD_1297	679	SPD_1297	Metabolism of cofactors and vitamins	Pyridoxinemetabolism	Cytoplasmic	291
gi|116077245	SPD_1298	A0A0H2ZPB4	NADH oxidase	nox	680	Nox	Energy metabolism	Electron transport	Cytoplasmic	459
gi|116075977	SPD_1299	A0A0H2ZLX6	Uncharacterized protein	SPD_1299	681	SPD_1299	Unknown function	Unknown function	Membrane	51
gi|116076989	SPD_1300	A0A0H2ZP92	Thiamine biosynthesis protein ApbE, putative	SPD_1300	681	SPD_1300	Unknown function	Unknown function	Cytoplasmic	307
gi|116076690	SPD_1301	A0A0H2ZP54	NADPH-dependent FMN reductase	azr_2	681	Azr_2	Unknown function	Unknown function	Cytoplasmic	201
gi|116077690	SPD_1302	A0A0H2ZQ70	Oxidoreductase, putative	SPD_1302	681	SPD_1302	Unknown function	Unknown function	Unknown	414
gi|116077684	SPD_1303	Q04JM9	UPF0291 protein SPD	SPD_1303	682	SPD_1303	Unknown function	Unknown function	Cytoplasmic	85
gi|116076808	SPD_1304	Q04JM8	Glycine--tRNA ligase beta subunit	glyS	682	GlyS	Protein synthesis	tRNA aminoacylation	Cytoplasmic	678
gi|116077213	SPD_1305	Q04JM7	Glycine--tRNA ligase alpha subunit	glyQ	682	GlyQ	Protein synthesis	tRNA aminoacylation	Cytoplasmic	305
gi|116076670	SPD_1306	A0A0H2ZMN1	Uncharacterized protein	SPD_1306	683	SPD_1306	Unknown function	Unknown function	Unknown	129
gi|116076566	SPD_1307	A0A0H2ZNX1	Uncharacterized protein	SPD_1307	683	SPD_1307	Unknown function	Unknown function	Unknown	129
gi|116076888	SPD_1308	A0A0H2ZN56	Oxidoreductase, aldo/keto reductase family protein	SPD_1308	684	SPD_1308	Unknown function	Unknown function	Cytoplasmic	280
gi|116076364	SPD_1309	A0A0H2ZN69	Peptidoglycan GlcNAc deacetylase	pgdA	684	PgdA	Glycan biosynthesis and metabolism	Peptidoglycan biosynthesis	Extracellular	480
gi|116077676	SPD_1310	A0A0H2ZQ61	Uncharacterized protein	SPD_1310	685	SPD_1310	Unknown function	Unknown function	Cytoplasmic	81
gi|116076898	SPD_1311	A0A0H2ZN65	Oxidoreductase, Gfo/Idh/MocA family protein	mocA	686	MocA	Unknown function	Unknown function	Unknown	325
gi|116077407	SPD_1312	A0A0H2ZQB8	ATP-dependent RNA helicase, DEAD/DEAH box family protein	cshA_1	686	CshA_1	Unknown function	Unknown function	Cytoplasmic	360
gi|116076771	SPD_1316	A0A0H2ZNR6	Uncharacterized protein	SPD_1316	690	SPD_1316	Unknown function	Unknown function	Cytoplasmic	112
gi|116077360	SPD_1317	A0A0H2ZQL9	Uncharacterized protein	SPD_1317	691	SPD_1317	Unknown function	Unknown function	Unknown	46
gi|116075932	SPD_1318	Q04N79	Elongation factor Tu	tuf	692	Tuf	Protein synthesis	Translation factors	Cytoplasmic	398
gi|116077657	SPD_1319	A0A0H2ZQ48	Uncharacterized protein	SPD_1319	693	SPD_1319	Unknown function	Unknown function	Membrane	40
gi|116076175	SPD_1320	A0A0H2ZLY2	Glycerol uptake facilitator protein, putative	SPD_1320	694	SPD_1320	Unknown function	Unknown function	Membrane	289
gi|116076930	SPD_1321	A0A0H2ZNK2	Cell wall surface anchor family protein	SPD_1321	695	SPD_1321	Glycan biosynthesis and metabolism	Glycan biosynthesis and metabolism - Other	Cellwall	202
gi|116075953	SPD_1322	A0A0H2ZMB5	Uncharacterized protein	SPD_1322	695	SPD_1322	Unknown function	Unknown function	Unknown	368
gi|116077298	SPD_1323	A0A0H2ZQL1	Uncharacterized protein	SPD_1323	696	SPD_1323	Unknown function	Unknown function	Unknown	84
gi|116076239	SPD_1324	A0A0H2ZM21	IS630-Spn1, transposase Orf2	SPD_1324	697	SPD_1324	Unknown function	Unknown function	Cytoplasmic	99
gi|116076180	SPD_1326	A0A0H2ZN08	Phosphoglucomutase/phosphomannomutase family protein	pgm	699	Pgm	Carbohydrate metabolism	Glycolysis / Gluconeogenesis	Cytoplasmic	572
gi|116077233	SPD_1327	A0A0H2ZQB3	Bacterocin transport accessory protein	bta	700	Bta	Biosynthesis of other secondary metabolites	Biosynthesis of other secondary metabolites	Unknown	115
gi|116076108	SPD_1328	A0A0H2ZLG0	Amino acid ABC transporter, amino acid-binding protein	aatB	701	AatB	Transport and binding proteins	Amino acids, peptides and amines	Unknown	278
gi|116076737	SPD_1329	A0A0H2ZP26	Amino acid ABC transporter, ATP-binding protein	SPD_1329	701	SPD_1329	Transport and binding proteins	Amino acids, peptides and amines	Membrane	209
gi|116077105	SPD_1330	A0A0H2ZNY7	Amino acid ABC transporter, permease protein	SPD_1330	701	SPD_1330	Transport and binding proteins	Amino acids, peptides and amines	Membrane	213
gi|116076525	SPD_1331	A0A0H2ZNR7	TPR domain protein	SPD_1331	702	SPD_1331	Unknown function	Unknown function	Cytoplasmic	409
gi|116077590	SPD_1332	A0A0H2ZQV2	Membrane protein, putative	SPD_1332	702	SPD_1332	Unknown function	Unknown function	Membrane	388
gi|116076009	SPD_1333	A0A0H2ZL92	Uncharacterized protein	pgl	703	Pgl	Carbohydrate metabolism	Pentose phosphate pathway	Cytoplasmic	337
gi|116076973	SPD_1334	Q04N64	ATP synthase epsilon chain	atpC	704	AtpC	Energy metabolism	Oxidative phosphorylation	Cytoplasmic	139
gi|116077120	SPD_1335	Q04HT9	ATP synthase subunit beta	atpD	704	AtpD	Energy metabolism	Oxidative phosphorylation	Membrane	468
gi|116076481	SPD_1336	Q04HT8	ATP synthase gamma chain	atpG	704	AtpG	Energy metabolism	Oxidative phosphorylation	Cytoplasmic	292
gi|116077785	SPD_1337	Q04HT7	ATP synthase subunit alpha	atpA	704	AtpA	Energy metabolism	Oxidative phosphorylation	Cytoplasmic	501
gi|116076719	SPD_1338	Q04HT6	ATP synthase subunit delta	atpH	704	AtpH	Energy metabolism	Oxidative phosphorylation	Cytoplasmic	178
gi|116076086	SPD_1339	Q04HT5	ATP synthase subunit b	atpF	704	AtpF	Energy metabolism	Oxidative phosphorylation	Membrane	164
gi|116076958	SPD_1340	Q04HT4	ATP synthase subunit a	atpB	704	AtpB	Energy metabolism	Oxidative phosphorylation	Membrane	238
gi|116075939	SPD_1341	Q04HT3	ATP synthase subunit c	atpE	704	AtpE	Energy metabolism	Oxidative phosphorylation	Membrane	66
gi|116077324	SPD_1342	A0A0H2ZQN7	IS1239, transposase, putative	SPD_1342	705	SPD_1342	Unknown function	Unknown function	Unknown	335
gi|116075898	SPD_1343	A0A0H2ZLP0	Acetyltransferase, GNAT family protein	SPD_1343	706	SPD_1343	Unknown function	Unknown function	Cytoplasmic	142
gi|116077486	SPD_1344	A0A0H2ZPM2	Uncharacterized protein	SPD_1344	707	SPD_1344	Unknown function	Unknown function	Membrane	135
gi|116077066	SPD_1345	Q04HS9	Transcription elongation factor GreA	greA	707	GreA	Transcription	Transcription factor	Cytoplasmic	160
gi|116076234	SPD_1346	A0A0H2ZLQ1	Endolytic murein transglycosylase	mltG	707	MltG	Glycan biosynthesis and metabolism	Peptidoglycan biosynthesis	Unknown	551
gi|116077309	SPD_1347	A0A0H2ZQ52	Acetyltransferase, GNAT family protein	SPD_1347	708	SPD_1347	Unknown function	Unknown function	Cytoplasmic	164
gi|116076843	SPD_1348	A0A0H2ZNW5	Acetyltransferase, GNAT family protein	SPD_1348	708	SPD_1348	Unknown function	Unknown function	Cytoplasmic	154
gi|116075960	SPD_1349	Q04HS5	UDP-N-acetylmuramate--L-alanine ligase	murC	708	MurC	Glycan biosynthesis and metabolism	Peptidoglycan biosynthesis	Cytoplasmic	444
gi|116076588	SPD_1350	A0A0H2ZMG8	Uncharacterized protein	SPD_1350	708	SPD_1350	Unknown function	Unknown function	Cytoplasmic	205
gi|116077453	SPD_1351	A0A0H2ZPR1	Snf2 family protein	SPD_1351	708	SPD_1351	Unknown function	Unknown function	Cytoplasmic	1032
gi|116077665	SPD_1352	A0A0H2ZQ25	Aminotransferase, class II	patB	709	PatB	Amino acid metabolism	Cysteine and methionine metabolism	Unknown	388
gi|116076497	SPD_1353	A0A0H2ZM83	Cys/Met metabolism PLP-dependent enzyme, putative	metB	709	MetB	Amino acid metabolism	Cysteine and methionine metabolism	Cytoplasmic	364
gi|116075973	SPD_1354	A0A0H2ZMJ3	Uncharacterized protein	SPD_1354	710	SPD_1354	Transport and binding proteins	Unknown substrate	Membrane	50
gi|116077081	SPD_1355	A0A0H2ZPI3	Uncharacterized protein	SPD_1355	711	SPD_1355	Transport and binding proteins	Unknown substrate	Membrane	150
gi|116076677	SPD_1357	A0A0H2ZNJ1	Oligopeptide ABC transporter, oligopeptide-binding protein AliB	aliB	713	AliB	Transport and binding proteins	Amino acids, peptides and amines	Cellwall	652
gi|116077686	SPD_1358	A0A0H2ZQ43	Polysaccharide biosynthesis protein, putative	SPD_1358	714	SPD_1358	Unknown function	Unknown function	Membrane	540
gi|116076858	SPD_1359	Q04JL8	UDP-N-acetylmuramoyl-L-alanyl-D-glutamate--L-lysine ligase	murE	715	MurE	Glycan biosynthesis and metabolism	Peptidoglycan biosynthesis	Cytoplasmic	481
gi|116076994	SPD_1360	A0A0H2ZP97	Uncharacterized protein	SPD_1360	716	SPD_1360	Cellular processes	Adaptations to atypical conditions	Cytoplasmic	64
gi|116076562	SPD_1362	A0A0H2ZMF1	Uncharacterized protein	murE2	718	MurE2	Glycan biosynthesis and metabolism	Peptidoglycan biosynthesis	Cytoplasmic	170
gi|116077401	SPD_1363	Q04JL5	Probable manganese-dependent inorganic pyrophosphatase	ppaC	719	PpaC	Energy metabolism	Oxidative phosphorylation	Cytoplasmic	311
gi|116075924	SPD_1364	Q04JL4	UPF0213 protein SPD	SPD_1364	720	SPD_1364	Unknown function	Unknown function	Membrane	99
gi|116077024	SPD_1365	A0A0H2ZPW4	Uncharacterized protein	SPD_1365	720	SPD_1365	Protein synthesis	Ribosomal proteins	Cytoplasmic	249
gi|116077061	SPD_1366	A0A0H2ZPW2	General stress protein 13, putative	SPD_1366	720	SPD_1366	Unknown function	Unknown function	Cytoplasmic	119
gi|116076154	SPD_1367	A0A0H2ZLJ0	Cof family protein/peptidyl-prolyl cis-trans isomerase, cyclophilin type	SPD_1367	720	SPD_1367	Protein fate	Protein folding and stabilization	Cytoplasmic	466
gi|116077326	SPD_1368	Q04JL0	30S ribosomal protein S18	rpsR	721	RpsR	Protein synthesis	Ribosomal proteins	Cytoplasmic	79
gi|116077455	SPD_1369	A0A0H2ZQW0	Single-stranded DNA-binding protein	ssb_1	721	Ssb_1	DNA metabolism	DNA replication, recombination and repair	Cytoplasmic	156
gi|116077316	SPD_1370	Q04JK8	30S ribosomal protein S6	rpsF	721	RpsF	Protein synthesis	Ribosomal proteins	Cytoplasmic	96
gi|116076211	SPD_1371	Q04JK7	Asparagine--tRNA ligase	asnC	722	AsnC	Protein synthesis	tRNA aminoacylation	Cytoplasmic	447
gi|116076396	SPD_1372	A0A0H2ZNG2	Glyoxalase family protein	SPD_1372	722	SPD_1372	Unknown function	Unknown function	Cytoplasmic	121
gi|116076911	SPD_1373	A0A0H2ZNI6	Aspartate aminotransferase	aspC	722	AspC	Amino acid metabolism	Alanine, aspartate and glutamate metabolism	Cytoplasmic	395
gi|116076679	SPD_1374	A0A0H2ZN09	Uncharacterized protein	ypmB	722	YpmB	Unknown function	Unknown function	Membrane	143
gi|116077773	SPD_1375	A0A0H2ZRU6	NADPH-dependent FMN reductase, putative	SPD_1375	723	SPD_1375	Unknown function	Unknown function	Unknown	182
gi|116076475	SPD_1376	A0A0H2ZM64	G5 domain family protein	SPD_1376	724	SPD_1376	Glycan biosynthesis and metabolism	Glycan biosynthesis and metabolism - Other	Cellwall	2551
gi|116077148	SPD_1377	A0A0H2ZQ44	Uncharacterized protein	SPD_1377	725	SPD_1377	Transcription	Transcription factor	Cytoplasmic	494
gi|116077479	SPD_1378	Q04JK0	UPF0246 protein SPD	SPD_1378	726	SPD_1378	Unknown function	Unknown function	Membrane	242
gi|116076393	SPD_1379	A0A0H2ZN91	Uncharacterized protein	SPD_1379	727	SPD_1379	Unknown function	Unknown function	Membrane	54
gi|116077682	SPD_1380	A0A0H2ZR55	Uncharacterized protein	SPD_1380	728	SPD_1380	Unknown function	Unknown function	Membrane	531
gi|116076070	SPD_1381	A0A0H2ZM43	Peptide deformylase	def-2	729	Def-2	Protein synthesis	Protein synthesis - Other	Cytoplasmic	136
gi|116076900	SPD_1382	A0A0H2ZP14	Glutathione S-transferase family protein	SPD_1382	730	SPD_1382	Unknown function	Unknown function	Unknown	263
gi|116076890	SPD_1383	A0A0H2ZP05	Cation-transporting ATPase, E1-E2 family protein	pacL	730	PacL	Transport and binding proteins	Cations and iron carrying compounds	Membrane	898
gi|116077747	SPD_1384	A0A0H2ZQA7	Cation efflux family protein	SPD_1384	731	SPD_1384	Transport and binding proteins	Cations and iron carrying compounds	Membrane	394
gi|116076717	SPD_1385	A0A0H2ZP78	ABC transporter, ATP-binding protein	SPD_1385	732	SPD_1385	Transport and binding proteins	Unknown substrate	Cytoplasmic	623
gi|116077576	SPD_1386	A0A0H2ZQ02	CCA-adding enzyme	pcnB	732	PcnB	Protein synthesis	tRNA and rRNA base modification	Cytoplasmic	394
gi|116076200	SPD_1387	Q04JJ1	4-hydroxy-tetrahydrodipicolinate reductase	dapB	732	DapB	Amino acid metabolism	Lysine biosynthesis	Cytoplasmic	255
gi|116077393	SPD_1388	A0A0H2ZPE6	DegV family protein	SPD_1388	733	SPD_1388	Unknown function	General	Cytoplasmic	282
gi|116075987	SPD_1389	A0A0H2ZLK3	Uncharacterized protein	SPD_1389	733	SPD_1389	Protein fate	Protein and peptide secretion and trafficking	Cytoplasmic	124
gi|116076998	SPD_1390	Q04JI8	Phosphoglucosamine mutase	glmM	734	GlmM	Carbohydrate metabolism	Amino sugar and nucleotide sugar metabolism	Cytoplasmic	450
gi|116077649	SPD_1391	A0A0H2ZR21	YbbR-like lipoprotein, putative	SPD_1391	734	SPD_1391	Unknown function	Unknown function	Membrane	259
gi|116076844	SPD_1392	A0A0H2ZPG9	Diadenylate cyclase	dacA	734	DacA	Nucleotide metabolism	Purine metabolism	Membrane	271
gi|116076907	SPD_1393	Q04JI5	Ferredoxin--NADP reductase	trxB	735	TrxB	Metabolism of other amino acids	Selenocompound metabolism	Cytoplasmic	322
gi|116076090	SPD_1394	Q04JI4	Putative sporulation transcription regulator WhiA	whiA	736	WhiA	Transcription	Transcription factor	Cytoplasmic	303
gi|116077031	SPD_1395	A0A0H2ZPW9	Putative gluconeogenesis factor	SPD_1395	736	SPD_1395	Unknown function	Unknown function	Cytoplasmic	325
gi|116075922	SPD_1396	Q04JI2	UPF0042 nucleotide-binding protein SPD	SPD_1396	736	SPD_1396	Unknown function	Unknown function	Cytoplasmic	296
gi|116077069	SPD_1397	A0A0H2ZPH1	Endoribonuclease L-PSP	SPD_1397	736	SPD_1397	Transcription	Degradation of RNA	Cytoplasmic	126
gi|116075969	SPD_1398	Q04JI0	Probable GTP-binding protein EngB	engB	736	EngB	Protein synthesis	Protein synthesis - Other	Cytoplasmic	195
gi|116077703	SPD_1399	Q04JH9	ATP-dependent Clp protease ATP-binding subunit ClpX	clpX	736	ClpX	Protein fate	Degradation of proteins, peptides and glycopeptides	Cytoplasmic	410
gi|116076620	SPD_1400	A0A0H2ZNU0	Uncharacterized protein	SPD_1400	736	SPD_1400	Unknown function	Unknown function	Membrane	56
gi|116077542	SPD_1401	A0A0H2ZQQ1	Dihydrofolate reductase	folA	736	FolA	Metabolism of cofactors and vitamins	Folate biosynthesis	Cytoplasmic	168
gi|116076391	SPD_1402	A0A0H2ZMB7	Non-heme iron-containing ferritin	SPD_1402	737	SPD_1402	Cellular processes	Adaptations to atypical conditions	Cytoplasmic	172
gi|116076429	SPD_1403	A0A0H2ZNC0	1,4-beta-N-acetylmuramidase, putative	lytC	738	LytC	Glycan biosynthesis and metabolism	Glycan degradation	Extracellular	490
gi|116077374	SPD_1404	Q04JH4	Triosephosphate isomerase	tpiA	739	TpiA	Carbohydrate metabolism	Glycolysis / Gluconeogenesis	Cytoplasmic	252
gi|116076607	SPD_1405	A0A0H2ZNT4	Uncharacterized protein	dnaD	740	DnaD	DNA metabolism	DNA replication, recombination and repair	Cytoplasmic	225
gi|116077459	SPD_1406	Q04JH2	Homoserine O-succinyltransferase	metA	740	MetA	Amino acid metabolism	Cysteine and methionine metabolism	Cytoplasmic	314
gi|172046079	SPD_1407	Q04JH1	Adenine phosphoribosyltransferase	apt	741	Apt	Nucleotide metabolism	Purine metabolism	Cytoplasmic	170
gi|116077669	SPD_1408	A0A0H2ZRM9	Uncharacterized protein	rebM	741	RebM	Unknown function	Unknown function	Cytoplasmic	252
gi|116076082	SPD_1409	A0A0H2ZMS4	Sugar ABC transporter, ATP-binding protein	msmX	742	MsmX	Transport and binding proteins	Other transport and binding proteins	Membrane	376
gi|116076961	SPD_1411	A0A0H2ZP64	Isochorismatase family protein	SPD_1411	744	SPD_1411	Unknown function	Unknown function	Cytoplasmic	191
gi|116076325	SPD_1412	Q04JG7	GTP-sensing transcriptional pleiotropic repressor CodY	codY	744	CodY	Regulatory functions	DNA interactions	Cytoplasmic	262
gi|116076587	SPD_1413	A0A0H2ZMU0	ATP-dependent RNA helicase, putative	deaD	745	DeaD	Transcription	Degradation of RNA	Membrane	524
gi|116077045	SPD_1414	A0A0H2ZNJ0	Oxalate:formate antiporter	oxlT	746	OxlT	Transport and binding proteins	Carbohydrates, organic alcohols and acids	Membrane	408
gi|116075996	SPD_1415	A0A0H2ZMK9	Oxidoreductase, pyridine nucleotide-disulfide, class I	SPD_1415	747	SPD_1415	Energy metabolism	Electron transport	Cytoplasmic	438
gi|116077119	SPD_1416	A0A0H2ZQ14	Uncharacterized protein	SPD_1416	748	SPD_1416	Glycan biosynthesis and metabolism	Peptidoglycan biosynthesis	Cytoplasmic	447
gi|116076519	SPD_1417	A0A0H2ZML1	Uncharacterized protein	SPD_1417	748	SPD_1417	Metabolism of cofactors and vitamins	Cobalamin biosynthesis	Unknown	260
gi|116076699	SPD_1418	A0A0H2ZNZ1	Proline dipeptidase PepQ	pepQ	748	PepQ	Protein fate	Degradation of proteins, peptides and glycopeptides	Cytoplasmic	360
gi|116077768	SPD_1419	A0A0H2ZRH6	Uncharacterized protein	SPD_1419	748	SPD_1419	Unknown function	Unknown function	Unknown	67
gi|116076342	SPD_1422	A0A0H2ZMM1	Membrane protein, putative	SPD_1422	751	SPD_1422	Unknown function	Unknown function	Membrane	153
gi|116077417	SPD_1423	A0A0H2ZPN3	Phosphomethylpyrimidine kinase, putative	pdxK	751	PdxK	Metabolism of cofactors and vitamins	Vitamin B6 metabolism	Unknown	257
gi|116077361	SPD_1424	Q04JF7	tRNA pseudouridine synthase A	truA	751	TruA	Protein synthesis	tRNA and rRNA base modification	Cytoplasmic	249
gi|116076511	SPD_1425	A0A0H2ZN33	Transporter, major facilitator family protein	SPD_1425	752	SPD_1425	Transport and binding proteins	Other transport and binding proteins	Membrane	383
gi|116076959	SPD_1426	A0A0H2ZNB1	Membrane protein, putative	SPD_1426	753	SPD_1426	Unknown function	Unknown function	Membrane	209
gi|116076962	SPD_1427	A0A0H2ZPR0	PhnA protein	phnA	754	PhnA	Metabolism of other amino acids	Phosphonate and phosphinate metabolism	Unknown	112
gi|116076194	SPD_1428	Q04JF3	Cytidylate kinase	cmk	755	Cmk	Nucleotide metabolism	Pyrimidine metabolism	Cytoplasmic	223
gi|116077334	SPD_1429	A0A0H2ZPH5	Uncharacterized protein	rpsO_2	755	RpsO_2	Unknown function	Unknown function	Cytoplasmic	158
gi|116076476	SPD_1430	A0A0H2ZNF8	Ferredoxin	fer	756	Fer	Energy metabolism	Electron transport	Cytoplasmic	68
gi|116076066	SPD_1431	A0A0H2ZMR1	Glycosyl transferase, group 2 family protein	SPD_1431	757	SPD_1431	Unknown function	Unknown function	Membrane	317
gi|116076912	SPD_1432	A0A0H2ZN75	UDP-glucose 4-epimerase	galE-1	757	GalE-1	Carbohydrate metabolism	Galactose metabolism	Cytoplasmic	339
gi|116076831	SPD_1433	A0A0H2ZNV4	FAD dependent oxidoreductase	SPD_1433	758	SPD_1433	Unknown function	Unknown function	Cytoplasmic	367
gi|116077607	SPD_1434	A0A0H2ZRG7	Putative GTP cyclohydrolase 1 type 2	SPD_1434	758	SPD_1434	Unknown function	General	Cytoplasmic	265
gi|116076192	SPD_1435	A0A0H2ZN19	Uncharacterized protein	SPD_1435	758	SPD_1435	Unknown function	Unknown function	Cytoplasmic	225
gi|116076513	SPD_1436	A0A0H2ZMK6	Cation-transporting ATPase, E1-E2 family protein	SPD_1436	759	SPD_1436	Transport and binding proteins	Cations and iron carrying compounds	Membrane	778
gi|116076054	SPD_1437	A0A0H2ZM31	Acyltransferase domain protein	plsC	760	PlsC	Lipid metabolism	Glycerolipid metabolism	Membrane	249
gi|116076870	SPD_1438	A0A0H2ZNF0	Cadmium resistance transporter, putative	SPD_1438	761	SPD_1438	Transport and binding proteins	Amino acids, peptides and amines	Membrane	204
gi|116077726	SPD_1439	Q04JE2	30S ribosomal protein S15	rpsO	762	RpsO	Protein synthesis	Ribosomal proteins	Cytoplasmic	89
gi|116076661	SPD_1440	A0A0H2ZNI0	Uncharacterized protein	SPD_1440	763	SPD_1440	Unknown function	Unknown function	Cytoplasmic	209
gi|116076932	SPD_1441	A0A0H2ZPJ7	Uncharacterized protein	SPD_1441	764	SPD_1441	Unknown function	Unknown function	Extracellular	40
gi|116076093	SPD_1442	A0A0H2ZML9	Uncharacterized protein	SPD_1442	765	SPD_1442	Unknown function	Unknown function	Cytoplasmic	68
gi|116077647	SPD_1443	A0A0H2ZRG5	Uncharacterized protein	SPD_1443	765	SPD_1443	Protein synthesis	Ribosomal proteins	Cytoplasmic	58
gi|116075914	SPD_1444	Q04JD7	Threonine--tRNA ligase	thrS	765	ThrS	Protein synthesis	tRNA aminoacylation	Cytoplasmic	647
gi|116077444	SPD_1445	A0A0H2ZQU9	Sensor histidine kinase	SPD_1445	766	SPD_1445	Unknown function	Unknown function	Membrane	324
gi|116076706	SPD_1446	A0A0H2ZP68	DNA-binding response regulator	SPD_1446	766	SPD_1446	Transcription	Transcription factor	Cytoplasmic	225
gi|116077502	SPD_1447	A0A0H2ZPN5	Uncharacterized protein	SPD_1447	767	SPD_1447	Unknown function	Unknown function	Cytoplasmic	357
gi|116076401	SPD_1448	A0A0H2ZNG7	Rrf2 family protein	SPD_1448	768	SPD_1448	Unknown function	Unknown function	Cytoplasmic	145
gi|116076264	SPD_1449	A0A0H2ZMZ4	Uncharacterized protein	SPD_1449	769	SPD_1449	Unknown function	Unknown function	Cytoplasmic	280
gi|116077322	SPD_1450	A0A0H2ZQ59	Iron-dependent transcriptional regulator	SPD_1450	770	SPD_1450	Transcription	Transcription factor	Cytoplasmic	216
gi|116077720	SPD_1451	A0A0H2ZR98	Uncharacterized protein	SPD_1451	770	SPD_1451	Unknown function	Unknown function	Unknown	56
gi|116076683	SPD_1452	A0A0H2ZP51	Membrane protein, putative	SPD_1452	771	SPD_1452	Unknown function	Unknown function	Membrane	130
gi|116076934	SPD_1454	A0A0H2ZPN7	Uncharacterized protein	SPD_1454	773	SPD_1454	Unknown function	Unknown function	Membrane	145
gi|116076000	SPD_1455	A0A0H2ZLZ3	Uncharacterized protein	SPD_1455	774	SPD_1455	Unknown function	Unknown function	Membrane	37
gi|116077036	SPD_1456	A0A0H2ZPU2	Uncharacterized protein	SPD_1456	775	SPD_1456	Unknown function	Unknown function	Membrane	53
gi|116076209	SPD_1457	Q04JC5	D-aminoacyl-tRNA deacylase	dtd	776	Dtd	Protein synthesis	tRNA aminoacylation	Unknown	147
gi|116077284	SPD_1458	A0A0H2ZP47	GTP pyrophosphokinase	relA	776	RelA	Cellular processes	Adaptations to atypical conditions	Cytoplasmic	740
gi|116076379	SPD_1459	A0A0H2ZMA8	Metallo-beta-lactamase superfamily protein	SPD_1459	777	SPD_1459	Unknown function	Unknown function	Cytoplasmic	209
gi|116077678	SPD_1460	A0A0H2ZQ35	Endopeptidase O	pepO	778	PepO	Protein fate	Degradation of proteins, peptides and glycopeptides	Cytoplasmic	630
gi|116076471	SPD_1461	A0A0H2ZNF3	Manganese ABC transporter, ATP-binding protein	psaB	779	PsaB	Transport and binding proteins	Cations and iron carrying compounds	Membrane	240
gi|116077347	SPD_1462	A0A0H2ZPI2	Manganese ABC transporter, permease protein, putative	psaC	779	PsaC	Transport and binding proteins	Cations and iron carrying compounds	Membrane	282
gi|116076549	SPD_1463	A0A0H2ZNT6	ABC transporter, substrate binding lipoprotein	mtsA	779	MtsA	Transport and binding proteins	Cations and iron carrying compounds	Membrane	309
gi|116077727	SPD_1464	Q04JB8	Probable thiol peroxidase	psaD	779	PsaD	Energy metabolism	Electron transport	Unknown	163
gi|116076622	SPD_1465	A0A0H2ZNF1	Efflux ABC transporter, permease protein	SPD_1465	780	SPD_1465	Unknown function	Unknown function	Membrane	902
gi|116076992	SPD_1466	A0A0H2ZNE3	ABC transporter, ATP-binding protein	SPD_1466	780	SPD_1466	Transport and binding proteins	Other transport and binding proteins	Membrane	233
gi|116075908	SPD_1467	A0A0H2ZM36	Uncharacterized protein	afcA	781	AfcA	Glycan biosynthesis and metabolism	Glycan degradation	Cytoplasmic	803
gi|116077237	SPD_1468	Q04JB4	2,3-bisphosphoglycerate-dependent phosphoglycerate mutase	gpmA	782	GpmA	Carbohydrate metabolism	Glycolysis / Gluconeogenesis	Cytoplasmic	230
gi|116076218	SPD_1469	A0A0H2ZMD5	Uncharacterized protein	SPD_1469	782	SPD_1469	Unknown function	Unknown function	Unknown	62
gi|116076577	SPD_1470	A0A0H2ZNR5	Uncharacterized protein	SPD_1470	783	SPD_1470	Unknown function	Unknown function	Membrane	46
gi|116077779	SPD_1471	A0A0H2ZRI6	Uncharacterized protein	SPD_1471	783	SPD_1471	Unknown function	Unknown function	Membrane	38
gi|116076518	SPD_1472	Q04JB0	Isoleucine--tRNA ligase	ileS	784	IleS	Protein synthesis	tRNA aminoacylation	Cytoplasmic	930
gi|116077355	SPD_1473	A0A0H2ZQ84	Uncharacterized protein	SPD_1473	785	SPD_1473	Cellular processes	Cell division	Unknown	38
gi|116076509	SPD_1474	A0A0H2ZM91	Cell division protein DivIVA	divIVA	785	DivIVA	Cellular processes	Cell division	Cytoplasmic	262
gi|116077458	SPD_1475	A0A0H2ZPR4	YlmH protein	ylmH	785	YlmH	Unknown function	Unknown function	Cytoplasmic	261
gi|116077266	SPD_1476	A0A0H2ZQH9	YlmG protein	ylmG	785	YlmG	Unknown function	Unknown function	Membrane	87
gi|116076102	SPD_1477	Q04JA5	Cell division protein SepF	ylmF	785	YlmF	Cellular processes	Cell division	Cytoplasmic	179
gi|116076946	SPD_1478	A0A0H2ZNL5	YlmE protein	ylmE	785	YlmE	Unknown function	Enzymes of unknown specificity	Cytoplasmic	223
gi|116076859	SPD_1479	A0A0H2ZNE0	Cell division protein FtsZ	ftsZ	785	FtsZ	Cellular processes	Cell division	Unknown	419
gi|116077572	SPD_1480	A0A0H2ZPT5	Cell division protein ftsA	ftsA	785	FtsA	Cellular processes	Cell division	Cytoplasmic	457
gi|116076267	SPD_1481	A0A0H2ZN72	Membrane protein, putative	SPD_1481	786	SPD_1481	Unknown function	Unknown function	Membrane	234
gi|116077127	SPD_1482	A0A0H2ZPN4	MutT/nudix family protein	SPD_1482	787	SPD_1482	Unknown function	Unknown function	Cytoplasmic	203
gi|116076333	SPD_1483	A0A0H2ZN51	UDP-N-acetylmuramoyl-tripeptide--D-alanyl-D-alanine ligase	murF	787	MurF	Glycan biosynthesis and metabolism	Peptidoglycan biosynthesis	Cytoplasmic	457
gi|116077408	SPD_1484	Q04J98	D-alanine--D-alanine ligase	ddl	787	Ddl	Glycan biosynthesis and metabolism	Peptidoglycan biosynthesis	Cytoplasmic	347
gi|116076583	SPD_1485	Q04J97	Recombination protein RecR	recR	788	RecR	DNA metabolism	DNA replication, recombination and repair	Cytoplasmic	198
gi|116077732	SPD_1486	A0A0H2ZQ75	Penicillin-binding protein 2B	penA	788	PenA	Glycan biosynthesis and metabolism	Peptidoglycan biosynthesis	Membrane	685
gi|116076816	SPD_1487	A0A0H2ZPE9	Phosphosugar-binding transcriptional regulator, putative	SPD_1487	789	SPD_1487	Transcription	Transcription factor	Cytoplasmic	283
gi|116076050	SPD_1488	A0A0H2ZMQ1	ROK family protein	SPD_1488	790	SPD_1488	Unknown function	Unknown function	Cytoplasmic	294
gi|116077128	SPD_1489	A0A0H2ZQ58	N-acetylneuraminate lyase, putative	SPD_1489	790	SPD_1489	Carbohydrate metabolism	Amino sugar and nucleotide sugar metabolism	Cytoplasmic	243
gi|116075896	SPD_1490	A0A0H2ZM23	Uncharacterized protein	SPD_1490	791	SPD_1490	Unknown function	Unknown function	Membrane	154
gi|116076554	SPD_1491	A0A0H2ZN73	Uncharacterized protein	SPD_1491	792	SPD_1491	Unknown function	Unknown function	Unknown	114
gi|116076030	SPD_1492	A0A0H2ZMG6	Uncharacterized protein	SPD_1492	793	SPD_1492	Unknown function	Unknown function	Cytoplasmic	150
gi|116076619	SPD_1493	A0A0H2ZMJ0	Sugar ABC transporter, permease protein	SPD_1493	794	SPD_1493	Transport and binding proteins	Carbohydrates, organic alcohols and acids	Membrane	279
gi|116077330	SPD_1494	A0A0H2ZQ63	Sugar ABC transporter, permease protein	SPD_1494	794	SPD_1494	Transport and binding proteins	Carbohydrates, organic alcohols and acids	Membrane	295
gi|116075981	SPD_1495	A0A0H2ZL68	Sugar ABC transporter, sugar-binding protein	SPD_1495	794	SPD_1495	Transport and binding proteins	Carbohydrates, organic alcohols and acids	Unknown	442
gi|116077512	SPD_1496	A0A0H2ZPV4	PTS system, IIBC components	ptsG	795	PtsG	Transport and binding proteins	Carbohydrates, organic alcohols and acids	Membrane	505
gi|116076463	SPD_1497	A0A0H2ZNE7	Putative N-acetylmannosamine-6-phosphate 2-epimerase	nanE-1	795	NanE-1	Carbohydrate metabolism	Amino sugar and nucleotide sugar metabolism	Cytoplasmic	232
gi|116076684	SPD_1498	A0A0H2ZN12	Putative oxidoreductase	SPD_1498	796	SPD_1498	Unknown function	Unknown function	Cytoplasmic	367
gi|116077563	SPD_1499	A0A0H2ZRC7	Sialidase B	nanB	796	NanB	Glycan biosynthesis and metabolism	Glycan degradation	Extracellular	697
gi|116076913	SPD_1500	A0A0H2ZPI0	ABC transporter, permease protein	SPD_1500	796	SPD_1500	Transport and binding proteins	Other transport and binding proteins	Membrane	277
gi|116076236	SPD_1501	A0A0H2ZME4	ABC transporter, permease protein	SPD_1501	796	SPD_1501	Transport and binding proteins	Other transport and binding proteins	Membrane	294
gi|116077147	SPD_1502	A0A0H2ZNS4	ABC transporter, substrate-binding protein	SPD_1502	796	SPD_1502	Transport and binding proteins	Other transport and binding proteins	Unknown	445
gi|116076167	SPD_1503	A0A0H2ZMS2	Uncharacterized protein	SPD_1503	796	SPD_1503	Unknown function	Unknown function	Cytoplasmic	150
gi|116077717	SPD_1504	A0A0H2ZQ85	Sialidase A	nanA	797	NanA	Glycan biosynthesis and metabolism	Glycan degradation	Cellwall	997
gi|116076114	SPD_1505	A0A0H2ZLG3	Uncharacterized protein	SPD_1505	798	SPD_1505	Unknown function	Unknown function	Membrane	75
gi|116077500	SPD_1506	A0A0H2ZR57	Acetyl xylan esterase, putative	cah	799	Cah	Biosynthesis of other secondary metabolites	Biosynthesis of other secondary metabolites	Cytoplasmic	326
gi|116076656	SPD_1507	A0A0H2ZP34	ATP-dependent DNA helicase RecG	recG	800	RecG	DNA metabolism	DNA replication, recombination and repair	Cytoplasmic	671
gi|116076341	SPD_1508	Q04J74	Alanine racemase	alr	800	Alr	Glycan biosynthesis and metabolism	Peptidoglycan biosynthesis	Cytoplasmic	367
gi|116076451	SPD_1509	Q04J73	Holo-[acyl-carrier-protein] synthase	acpS	800	AcpS	Protein fate	Protein modification and repair	Cytoplasmic	120
gi|116076757	SPD_1510	A0A0H2ZNQ6	Phospho-2-dehydro-3-deoxyheptonate aldolase	aroF	800	AroF	Amino acid metabolism	Phenylalanine, tyrosine and tryptophan biosynthesis	Cytoplasmic	343
gi|116077743	SPD_1511	A0A0H2ZQ82	Phospho-2-dehydro-3-deoxyheptonate aldolase	aroG	800	AroG	Amino acid metabolism	Phenylalanine, tyrosine and tryptophan biosynthesis	Cytoplasmic	343
gi|116075986	SPD_1512	Q04J70	Protein translocase subunit SecA	secA	801	SecA	Protein fate	Protein and peptide secretion and trafficking	Cytoplasmic	837
gi|116076892	SPD_1514	A0A0H2ZNH1	ABC transporter, ATP-binding protein	SPD_1514	803	SPD_1514	Transport and binding proteins	Other transport and binding proteins	Membrane	216
gi|116076258	SPD_1515	A0A0H2ZMY9	Membrane protein, putative	SPD_1515	803	SPD_1515	Unknown function	Unknown function	Membrane	191
gi|116077184	SPD_1516	A0A0H2ZQB7	Membrane protein, putative	SPD_1516	803	SPD_1516	Unknown function	Unknown function	Membrane	263
gi|116077545	SPD_1517	A0A0H2ZPR6	Uncharacterized protein	SPD_1517	803	SPD_1517	Unknown function	Unknown function	Unknown	130
gi|116077550	SPD_1518	A0A0H2ZPR9	Transcriptional activator, Rgg/GadR/MutR family protein	SPD_1518	804	SPD_1518	Regulatory functions	DNA interactions	Cytoplasmic	283
gi|116076455	SPD_1519	Q04J64	GTPase Der	der	805	Der	Protein synthesis	Protein synthesis - Other	Membrane	436
gi|116077651	SPD_1520	A0A0H2ZQ46	Nitroreductase family protein	SPD_1520	805	SPD_1520	Unknown function	Unknown function	Cytoplasmic	237
gi|116076782	SPD_1521	A0A0H2ZP53	Primosomal protein DnaI	dnaI	805	DnaI	Unknown function	Unknown function	Cytoplasmic	298
gi|116076046	SPD_1522	A0A0H2ZLP2	Uncharacterized protein	SPD_1522	805	SPD_1522	Unknown function	Unknown function	Unknown	389
gi|116077306	SPD_1523	Q04J60	Transcriptional repressor NrdR	nrdR	805	NrdR	Transcription	Transcription factor	Cytoplasmic	157
gi|116077368	SPD_1524	A0A0H2ZQS8	Transcriptional regulator, GntR family protein	SPD_1524	806	SPD_1524	Transcription	Transcription factor	Unknown	121
gi|116076548	SPD_1525	A0A0H2ZN68	ABC transporter, ATP-binding protein	SPD_1525	806	SPD_1525	Transport and binding proteins	Other transport and binding proteins	Membrane	231
gi|116076542	SPD_1526	A0A0H2ZMN5	Membrane protein, putative	SPD_1526	806	SPD_1526	Unknown function	Unknown function	Membrane	255
gi|116077574	SPD_1527	A0A0H2ZQT3	Membrane protein, putative	natB	807	NatB	Transport and binding proteins	Cations and iron carrying compounds	Membrane	399
gi|116076756	SPD_1528	A0A0H2ZP37	ABC transporter, ATP-binding protein	SPD_1528	807	SPD_1528	Transport and binding proteins	Other transport and binding proteins	Membrane	297
gi|116076461	SPD_1530	A0A0H2ZMF8	Membrane protein, putative	SPD_1530	809	SPD_1530	Unknown function	Unknown function	Membrane	205
gi|116077311	SPD_1531	A0A0H2ZPG3	Fructokinase	scrK	810	ScrK	Carbohydrate metabolism	Amino sugar and nucleotide sugar metabolism	Cytoplasmic	295
gi|116077692	SPD_1532	A0A0H2ZRJ4	PTS system IIABC components	scrA	810	ScrA	Transport and binding proteins	Carbohydrates, organic alcohols and acids	Membrane	627
gi|116076373	SPD_1533	A0A0H2ZMA5	Uncharacterized protein	SPD_1533	811	SPD_1533	Unknown function	Unknown function	Unknown	65
gi|116076988	SPD_1534	A0A0H2ZPQ2	Sucrose-6-phosphate hydrolase	scrB	812	ScrB	Carbohydrate metabolism	Starch and sucrose metabolism	Cytoplasmic	484
gi|116076637	SPD_1535	A0A0H2ZNG0	Sucrose operon repressor	scrR	812	ScrR	Transcription	Transcription factor	Cytoplasmic	321
gi|116077294	SPD_1536	A0A0H2ZP57	3-hydroxy-3-methylglutaryl coenzyme A reductase	mvaA	813	MvaA	Metabolism of terpenoids and polyketides	Terpenoid backbone biosynthesis	Cytoplasmic	424
gi|116075959	SPD_1537	A0A0H2ZLW5	Hydroxymethylglutaryl-CoA synthase	mvaS	813	MvaS	Metabolism of terpenoids and polyketides	Terpenoid backbone biosynthesis	Unknown	398
gi|116076432	SPD_1538	A0A0H2ZNJ3	Uncharacterized protein	SPD_1538	814	SPD_1538	Unknown function	Unknown function	Unknown	95
gi|116077110	SPD_1540	A0A0H2ZNZ2	Membrane protein, putative	SPD_1540	816	SPD_1540	Unknown function	Unknown function	Membrane	149
gi|116076839	SPD_1541	A0A0H2ZNC7	Membrane protein, putative	SPD_1541	816	SPD_1541	Unknown function	Unknown function	Membrane	252
gi|116077758	SPD_1542	Q04J43	Serine/threonine-protein kinase StkP	stkP	816	StkP	Protein fate	Protein modification and repair	Membrane	659
gi|116076508	SPD_1543	Q04J42	Protein phosphatase PhpP	phpP	816	PhpP	Protein fate	Protein modification and repair	Cytoplasmic	246
gi|116077606	SPD_1544	A0A0H2ZQW9	Ribosomal RNA small subunit methyltransferase B	sun	816	Sun	Protein synthesis	tRNA and rRNA base modification	Cytoplasmic	437
gi|116076345	SPD_1545	Q04J40	Methionyl-tRNA formyltransferase	fmt	816	Fmt	Protein synthesis	tRNA aminoacylation	Cytoplasmic	311
gi|116077537	SPD_1546	A0A0H2ZQP3	Primosomal protein N	priA	816	PriA	DNA metabolism	DNA replication, recombination and repair	Cytoplasmic	798
gi|116076155	SPD_1547	Q04J38	DNA-directed RNA polymerase subunit omega	rpoZ	816	RpoZ	Transcription	RNA polymerase	Cytoplasmic	104
gi|116077234	SPD_1548	A0A0H2ZPY5	Guanylate kinase	gmk	816	Gmk	Nucleotide metabolism	Purine metabolism	Cytoplasmic	208
gi|116077445	SPD_1549	Q04J36	Ribonuclease Y	rny	817	Rny	Transcription	Degradation of RNA	Cytoplasmic	537
gi|116076414	SPD_1550	A0A0H2ZMD4	Addiction module toxin, Txe/YoeB family protein	SPD_1550	818	SPD_1550	Unknown function	Unknown function	Membrane	84
gi|116077525	SPD_1551	A0A0H2ZR31	Prevent-host-death family protein	SPD_1551	818	SPD_1551	Unknown function	Unknown function	Cytoplasmic	86
gi|116076658	SPD_1552	Q04J33	UPF0348 protein SPD	SPD_1552	819	SPD_1552	Unknown function	Unknown function	Cytoplasmic	365
gi|116077628	SPD_1553	A0A0H2ZRF5	Uncharacterized protein	SPD_1553	819	SPD_1553	Biosynthesis of other secondary metabolites	Unknown substrate	Cytoplasmic	248
gi|116076129	SPD_1554	A0A0H2ZMW6	Ribosomal silencing factor RsfS	rsfS	819	RsfS	Transcription	Transcription - Other	Cytoplasmic	117
gi|116077303	SPD_1555	A0A0H2ZQ47	Isochorismatase family protein	SPD_1555	819	SPD_1555	Unknown function	Unknown function	Cytoplasmic	166
gi|116075945	SPD_1556	A0A0H2ZLH1	Uncharacterized protein	SPD_1556	819	SPD_1556	Unknown function	Enzymes of unknown specificity	Cytoplasmic	197
gi|116076410	SPD_1557	A0A0H2ZM20	Probable nicotinate-nucleotide adenylyltransferase	nadD	819	NadD	Metabolism of cofactors and vitamins	Nicotinate and nicotinamide metabolism	Membrane	209
gi|116076217	SPD_1558	A0A0H2ZMV6	Uncharacterized protein	SPD_1558	819	SPD_1558	Unknown function	Unknown function	Cytoplasmic	103
gi|116076846	SPD_1559	A0A0H2ZN17	GTP-binding protein	SPD_1559	820	SPD_1559	Protein synthesis	Protein synthesis - Other	Membrane	368
gi|116077783	SPD_1560	A0A0H2ZQE3	HAD superfamily protein (Subfamily IIIA) phosphatase	SPD_1560	820	SPD_1560	Unknown function	Enzymes of unknown specificity	Unknown	175
gi|116076718	SPD_1561	A0A0H2ZN41	Magnesium transporter, CorA family protein, putative	SPD_1561	820	SPD_1561	Transport and binding proteins	Cations and iron carrying compounds	Cytoplasmic	298
gi|116077526	SPD_1562	A0A0H2ZQM9	Small conductance mechanosensitive ion channel (MscS) family protein	SPD_1562	820	SPD_1562	Transport and binding proteins	Cations and iron carrying compounds	Membrane	198
gi|116077287	SPD_1563	A0A0H2ZQJ9	Dicarboxylate/amino acid:cation (Na+ or H+) symporter (DAACS) family protein	SPD_1563	821	SPD_1563	Transport and binding proteins	Amino acids, peptides and amines	Membrane	319
gi|116077739	SPD_1564	A0A0H2ZRN3	Uncharacterized protein	SPD_1564	822	SPD_1564	Unknown function	Unknown function	Membrane	317
gi|116077091	SPD_1565	A0A0H2ZPJ6	Transcriptional regulator, putative	SPD_1565	823	SPD_1565	Transcription	Transcription factor	Cytoplasmic	126
gi|116076263	SPD_1566	A0A0H2ZLS3	Uncharacterized protein	SPD_1566	823	SPD_1566	Unknown function	Unknown function	Unknown	100
gi|116077356	SPD_1567	A0A0H2ZQR8	Thioredoxin	trx	823	Trx	Energy metabolism	Electron transport	Cytoplasmic	104
gi|116076480	SPD_1568	A0A0H2ZM70	NADPH-dependent 7-cyano-7-deazaguanine reductase	queF	824	QueF	Metabolism of cofactors and vitamins	Folate biosynthesis	Cytoplasmic	114
gi|116076309	SPD_1569	A0A0H2ZMJ8	Aquaporin	SPD_1569	825	SPD_1569	Transport and binding proteins	Other transport and binding proteins	Membrane	222
gi|116076025	SPD_1570	A0A0H2ZMG4	Uncharacterized protein	SPD_1570	826	SPD_1570	Unknown function	Unknown function	Cytoplasmic	184
gi|116077160	SPD_1571	A0A0H2ZPT7	Oligoendopeptidase F, putative	SPD_1571	827	SPD_1571	Protein fate	Degradation of proteins, peptides and glycopeptides	Cytoplasmic	598
gi|116076269	SPD_1572	A0A0H2ZLS7	Ribosomal RNA small subunit methyltransferase E	SPD_1572	827	SPD_1572	Protein synthesis	tRNA and rRNA base modification	Membrane	247
gi|116077223	SPD_1573	Q04J12	Ribosomal protein L11 methyltransferase	prmA	827	PrmA	Protein synthesis	Ribosomal proteins	Cytoplasmic	316
gi|116076177	SPD_1574	A0A0H2ZMT2	MutT/nudix family protein	SPD_1574	828	SPD_1574	Unknown function	Unknown function	Cytoplasmic	142
gi|116077670	SPD_1575	A0A0H2ZQ56	Lipoprotein, putative	SPD_1575	828	SPD_1575	Unknown function	Unknown function	Membrane	367
gi|116076409	SPD_1576	A0A0H2ZMD0	Uncharacterized protein	SPD_1576	829	SPD_1576	Unknown function	Unknown function	Cytoplasmic	156
gi|116076004	SPD_1577	A0A0H2ZMF2	Uncharacterized protein	SPD_1577	830	SPD_1577	Unknown function	Unknown function	Cytoplasmic	150
gi|116076855	SPD_1578	A0A0H2ZPH8	Uncharacterized protein	SPD_1578	831	SPD_1578	Unknown function	Unknown function	Unknown	59
gi|116076275	SPD_1579	A0A0H2ZN04	Uncharacterized protein	SPD_1579	832	SPD_1579	Unknown function	Unknown function	Unknown	79
gi|116077307	SPD_1580	A0A0H2ZP67	ATPase, AAA family protein	SPD_1580	833	SPD_1580	Unknown function	Unknown function	Cytoplasmic	423
gi|116077782	SPD_1582	A0A0H2ZQF5	Sucrose-6-phosphate hydrolase, putative	sacA	835	SacA	Carbohydrate metabolism	Starch and sucrose metabolism	Cytoplasmic	439
gi|116076682	SPD_1583	A0A0H2ZNJ6	ABC transporter, permease protein	SPD_1583	835	SPD_1583	Transport and binding proteins	Carbohydrates, organic alcohols and acids	Membrane	281
gi|116076278	SPD_1584	A0A0H2ZM49	ABC transporter, permease protein	SPD_1584	835	SPD_1584	Transport and binding proteins	Carbohydrates, organic alcohols and acids	Membrane	300
gi|116077521	SPD_1585	A0A0H2ZPW1	ABC transporter, sugar-binding protein	SPD_1585	835	SPD_1585	Transport and binding proteins	Carbohydrates, organic alcohols and acids	Unknown	436
gi|116076121	SPD_1586	A0A0H2ZM77	Sugar-binding transcriptional regulator, LacI family protein	SPD_1586	835	SPD_1586	Transcription	Transcription factor	Cytoplasmic	331
gi|116076876	SPD_1587	A0A0H2ZN44	Transcriptional activator, putative	SPD_1587	836	SPD_1587	Transcription	Transcription factor	Cytoplasmic	493
gi|116076703	SPD_1588	A0A0H2ZMQ5	Uncharacterized protein	SPD_1588	837	SPD_1588	Unknown function	Unknown function	Membrane	188
gi|116076128	SPD_1589	A0A0H2ZM81	Lipoprotein, putative	SPD_1589	837	SPD_1589	Unknown function	Unknown function	Membrane	56
gi|116076484	SPD_1590	A0A0H2ZNN3	General stress protein 24, putative	SPD_1590	837	SPD_1590	Unknown function	Unknown function	Cytoplasmic	202
gi|116076479	SPD_1591	A0A0H2ZMH3	Uncharacterized protein	SPD_1591	837	SPD_1591	Unknown function	Unknown function	Unknown	67
gi|116077553	SPD_1592	A0A0H2ZRB5	Acetyltransferase, GNAT family protein	SPD_1592	838	SPD_1592	Protein fate	Protein modification and repair	Cytoplasmic	148
gi|116076784	SPD_1593	A0A0H2ZPC4	Type IV prepilin peptidase, putative	SPD_1593	839	SPD_1593	Unknown function	Unknown function	Membrane	219
gi|116076702	SPD_1594	A0A0H2ZN26	Transcriptional regulator	SPD_1594	840	SPD_1594	Transcription	Transcription factor	Cytoplasmic	383
gi|116077702	SPD_1595	A0A0H2ZQ57	Uncharacterized protein	SPD_1595	840	SPD_1595	Unknown function	Unknown function	Cytoplasmic	243
gi|116075904	SPD_1596	Q04IZ0	Tryptophan synthase alpha chain	trpA	841	TrpA	Amino acid metabolism	Phenylalanine, tyrosine and tryptophan biosynthesis	Cytoplasmic	258
gi|116077198	SPD_1597	Q04IY9	Tryptophan synthase beta chain	trpB	841	TrpB	Amino acid metabolism	Phenylalanine, tyrosine and tryptophan biosynthesis	Cytoplasmic	407
gi|116076543	SPD_1598	Q04IY8	N-(5'-phosphoribosyl)anthranilate isomerase	trpF	841	TrpF	Amino acid metabolism	Phenylalanine, tyrosine and tryptophan biosynthesis	Cytoplasmic	199
gi|116077414	SPD_1599	Q04IY7	Indole-3-glycerol phosphate synthase	trpC	841	TrpC	Amino acid metabolism	Phenylalanine, tyrosine and tryptophan biosynthesis	Cytoplasmic	255
gi|116076856	SPD_1600	Q04IY6	Anthranilate phosphoribosyltransferase	trpD	841	TrpD	Amino acid metabolism	Phenylalanine, tyrosine and tryptophan biosynthesis	Cytoplasmic	334
gi|116076651	SPD_1601	A0A0H2ZMY6	Anthranilate synthase component II	trpG	841	TrpG	Amino acid metabolism	Phenylalanine, tyrosine and tryptophan biosynthesis	Cytoplasmic	188
gi|116077501	SPD_1602	A0A0H2ZPU3	Anthranilate synthase component I	trpE	841	TrpE	Amino acid metabolism	Phenylalanine, tyrosine and tryptophan biosynthesis	Cytoplasmic	453
gi|116076557	SPD_1603	A0A0H2ZME8	Uncharacterized protein	SPD_1603	842	SPD_1603	Unknown function	Unknown function	Unknown	51
gi|116076408	SPD_1604	A0A0H2ZNH3	Uncharacterized protein	SPD_1604	842	SPD_1604	Unknown function	Unknown function	Unknown	39
gi|116077305	SPD_1605	A0A0H2ZPF9	Sugar-binding transcriptional regulator, LacI family protein	SPD_1605	843	SPD_1605	Transcription	Transcription factor	Cytoplasmic	333
gi|116076210	SPD_1606	A0A0H2ZM03	MgtC/SapB family protein	SPD_1606	844	SPD_1606	Transport and binding proteins	Cations and iron carrying compounds	Membrane	236
gi|116077056	SPD_1607	A0A0H2ZPF8	ABC transporter, permease protein	afuB	844	AfuB	Transport and binding proteins	Other transport and binding proteins	Membrane	563
gi|116076921	SPD_1608	A0A0H2ZP31	ABC transporter ATP-binding protein	afuC	844	AfuC	Transport and binding proteins	Other transport and binding proteins	Membrane	336
gi|116076003	SPD_1609	A0A0H2ZL87	ABC transporter, substrate-binding protein	afuA	844	AfuA	Transport and binding proteins	Other transport and binding proteins	Unknown	355
gi|116076664	SPD_1610	A0A0H2ZMM7	Uncharacterized protein	SPD_1610	844	SPD_1610	Unknown function	Unknown function	Cytoplasmic	219
gi|116077728	SPD_1611	A0A0H2ZRS5	Uncharacterized protein	SPD_1611	845	SPD_1611	Unknown function	Unknown function	Unknown	37
gi|116076144	SPD_1612	A0A0H2ZMQ6	UDP-glucose 4-epimerase	galE-2	845	GalE-2	Carbohydrate metabolism	Galactose metabolism	Cytoplasmic	326
gi|116077499	SPD_1613	A0A0H2ZQK0	Galactose-1-phosphate uridylyltransferase	galT-1	845	GalT-1	Carbohydrate metabolism	Galactose metabolism	Cytoplasmic	491
gi|116076923	SPD_1614	A0A0H2ZNJ7	Phosphate transport system regulatory protein PhoU, putative	SPD_1614	845	SPD_1614	Transport and binding proteins	Cations and iron carrying compounds	Cytoplasmic	213
gi|116076171	SPD_1615	A0A0H2ZLK5	Uncharacterized protein	SPD_1615	845	SPD_1615	Unknown function	Unknown function	Unknown	164
gi|116076648	SPD_1616	A0A0H2ZNV0	Uncharacterized protein	SPD_1616	845	SPD_1616	Unknown function	Unknown function	Unknown	98
gi|116075937	SPD_1617	A0A0H2ZMD2	Cell wall surface anchor family protein	pfbA	845	PfbA	Cellular processes	Pathogenesis	Cellwall	708
gi|116077790	SPD_1618	A0A0H2ZRV6	Uncharacterized protein	SPD_1618	846	SPD_1618	Unknown function	Unknown function	Extracellular	58
gi|116076696	SPD_1619	A0A0H2ZN23	Capsular polysaccharide biosynthesis protein, putative	SPD_1619	847	SPD_1619	Glycan biosynthesis and metabolism	Peptidoglycan biosynthesis	Cytoplasmic	408
gi|116077569	SPD_1620	A0A0H2ZRD5	Glycosyl transferase, putative	SPD_1620	847	SPD_1620	Carbohydrate metabolism	Fructose and mannose metabolism	Membrane	230
gi|116076641	SPD_1621	A0A0H2ZMX7	ABC transporter, ATP-binding/permease protein	SPD_1621	848	SPD_1621	Transport and binding proteins	Other transport and binding proteins	Membrane	583
gi|116076327	SPD_1622	A0A0H2ZML2	ABC transporter, ATP-binding/permease protein	SPD_1622	848	SPD_1622	Transport and binding proteins	Other transport and binding proteins	Membrane	581
gi|116076413	SPD_1623	A0A0H2ZNH7	Uncharacterized protein	SPD_1623	849	SPD_1623	Unknown function	Unknown function	Unknown	176
gi|116076063	SPD_1624	A0A0H2ZLD0	Uncharacterized protein	SPD_1624	849	SPD_1624	Unknown function	Unknown function	Unknown	89
gi|116077155	SPD_1625	A0A0H2ZQA0	Uncharacterized protein	SPD_1625	849	SPD_1625	Unknown function	Unknown function	Membrane	75
gi|116076625	SPD_1626	A0A0H2ZMW7	Exodeoxyribonuclease III	xth	850	Xth	DNA metabolism	DNA replication, recombination and repair	Cytoplasmic	275
gi|116076388	SPD_1628	Q04IV9	Xanthine phosphoribosyltransferase	xpt	852	Xpt	Nucleotide metabolism	Purine metabolism	Cytoplasmic	193
gi|116077554	SPD_1629	A0A0H2ZPY8	Xanthine permease	pbuX	852	PbuX	Transport and binding proteins	Nucleosides, purines and pyrimidines	Membrane	420
gi|116076440	SPD_1630	A0A0H2ZME6	Uncharacterized protein	dpnD	853	DpnD	DNA metabolism	DNA modification	Cytoplasmic	153
gi|116077159	SPD_1631	A0A0H2ZQ73	Dam-replacing family protein	SPD_1631	854	SPD_1631	Unknown function	Unknown function	Cytoplasmic	254
gi|116076582	SPD_1632	A0A0H2ZMG3	Uncharacterized protein	paaI	855	PaaI	Amino acid metabolism	Phenylalanine metabolism	Cytoplasmic	134
gi|116077741	SPD_1633	A0A0H2ZRT4	Galactose-1-phosphate uridylyltransferase	galT-2	856	GalT-2	Carbohydrate metabolism	Galactose metabolism	Cytoplasmic	493
gi|116076716	SPD_1634	A0A0H2ZNM7	Galactokinase	galK	856	GalK	Carbohydrate metabolism	Galactose metabolism	Cytoplasmic	392
gi|116076124	SPD_1635	A0A0H2ZLH0	Galactose operon repressor	galR	857	GalR	Transcription	Transcription factor	Cytoplasmic	335
gi|116076957	SPD_1636	A0A0H2ZNM3	Alcohol dehydrogenase, zinc-containing	adh	858	Adh	Carbohydrate metabolism	Glycolysis / Gluconeogenesis	Cytoplasmic	345
gi|116076314	SPD_1637	A0A0H2ZLV3	Transcriptional regulator, MerR family protein	SPD_1637	858	SPD_1637	Transcription	Transcription factor	Cytoplasmic	117
gi|116077533	SPD_1638	A0A0H2ZPX0	Cation efflux system protein	SPD_1638	859	SPD_1638	Transport and binding proteins	Cations and iron carrying compounds	Membrane	296
gi|116077241	SPD_1639	A0A0H2ZQB6	Transcriptional regulator, TetR family protein	SPD_1639	860	SPD_1639	Transcription	Transcription factor	Cytoplasmic	178
gi|116075885	SPD_1640	A0A0H2ZLN1	Nicotinamide mononucleotide transporter PnuC, putative	pnuC	861	PnuC	Metabolism of cofactors and vitamins	Pyridine nucleotides	Membrane	268
gi|116077247	SPD_1642	A0A0H2ZQB9	Choline transporter (Glycine betaine transport system permease protein)	proWX	863	ProWX	Transport and binding proteins	Cations and iron carrying compounds	Membrane	506
gi|116076002	SPD_1643	A0A0H2ZLL3	Choline transporter	proV	863	ProV	Transport and binding proteins	Cations and iron carrying compounds	Membrane	242
gi|116077001	SPD_1644	A0A0H2ZPU5	Uncharacterized protein	SPD_1644	863	SPD_1644	Unknown function	Unknown function	Cytoplasmic	254
gi|116076643	SPD_1645	A0A0H2ZNU8	Transcriptional regulator, MarR family protein	SPD_1645	863	SPD_1645	Transcription	Transcription factor	Unknown	147
gi|116077375	SPD_1646	A0A0H2ZPK3	Uncharacterized protein	SPD_1646	864	SPD_1646	Unknown function	Unknown function	Unknown	98
gi|116076777	SPD_1647	A0A0H2ZP50	Glutamyl aminopeptidase PepA	pepA	864	PepA	Protein fate	Degradation of proteins, peptides and glycopeptides	Cytoplasmic	354
gi|116076151	SPD_1648	A0A0H2ZM95	NAD-dependent epimerase/dehydratase family protein	galE	865	GalE	Carbohydrate metabolism	Galactose metabolism	Unknown	233
gi|116076490	SPD_1649	A0A0H2ZMI3	Iron-compound ABC transporter, permease protein	SPD_1649	866	SPD_1649	Transport and binding proteins	Cations and iron carrying compounds	Membrane	319
gi|116077594	SPD_1650	A0A0H2ZRB6	Iron-compound ABC transporter, permease protein	SPD_1650	866	SPD_1650	Transport and binding proteins	Cations and iron carrying compounds	Membrane	318
gi|116076533	SPD_1651	A0A0H2ZNK9	Iron-compound ABC transporter, ATP-binding protein	SPD_1651	866	SPD_1651	Transport and binding proteins	Cations and iron carrying compounds	Membrane	250
gi|116075923	SPD_1652	A0A0H2ZMC3	Iron-compound ABC transporter, iron-compound-binding protein	SPD_1652	866	SPD_1652	Transport and binding proteins	Cations and iron carrying compounds	Membrane	321
gi|116076773	SPD_1653	Q04IT5	Putative membrane protein insertion efficiency factor	SPD_1653	867	SPD_1653	Unknown function	Unknown function	Membrane	80
gi|116076361	SPD_1654	A0A0H2ZM97	Pseudouridine synthase	rluB	867	RluB	Protein synthesis	tRNA and rRNA base modification	Cytoplasmic	240
gi|116077206	SPD_1655	Q04IT3	Segregation and condensation protein B	scpB	867	ScpB	DNA metabolism	Chromosome-associated proteins	Cytoplasmic	189
gi|116076581	SPD_1656	Q04IT2	Segregation and condensation protein A	scpA	867	ScpA	Cellular processes	Cell division	Cytoplasmic	242
gi|215274946	SPD_1657	Q04IT1	Tyrosine recombinase XerD-like	SPD_1657	867	SPD_1657	Unknown function	Unknown function	Cytoplasmic	244
gi|116076270	SPD_1658	A0A0H2ZN00	CBS domain protein	SPD_1658	867	SPD_1658	Unknown function	Unknown function	Cytoplasmic	153
gi|116077365	SPD_1659	A0A0H2ZPB9	Phosphodiesterase, MJ0936 family protein	SPD_1659	867	SPD_1659	Unknown function	Enzymes of unknown specificity	Cytoplasmic	173
gi|116076072	SPD_1660	A0A0H2ZMR5	Non-canonical purine NTP pyrophosphatase	rdgB	867	RdgB	Nucleotide metabolism	Purine metabolism	Membrane	323
gi|116077172	SPD_1661	Q04IS7	Glutamate racemase	murI	867	MurI	Glycan biosynthesis and metabolism	Peptidoglycan biosynthesis	Cytoplasmic	264
gi|116076948	SPD_1662	Q04IS6	UPF0154 protein SPD	SPD_1662	868	SPD_1662	Unknown function	Unknown function	Membrane	82
gi|116076105	SPD_1663	A0A0H2ZM66	Alpha,alpha-phosphotrehalase	treC	869	TreC	Carbohydrate metabolism	Starch and sucrose metabolism	Cytoplasmic	541
gi|116077656	SPD_1664	A0A0H2ZRL6	PTS system, trehalose-specific IIABC components	treP	869	TreP	Transport and binding proteins	Carbohydrates, organic alcohols and acids	Membrane	655
gi|116076570	SPD_1665	A0A0H2ZNB2	Trehalose operon repressor	treR	870	TreR	Regulatory functions	DNA interactions	Cytoplasmic	236
gi|116077131	SPD_1667	A0A0H2ZQ26	Oligopeptide ABC transporter, ATP-binding protein AmiF	amiF	872	AmiF	Transport and binding proteins	Amino acids, peptides and amines	Membrane	308
gi|116076035	SPD_1668	A0A0H2ZMH2	Oligopeptide ABC transporter, ATP-binding protein AmiE	amiE	872	AmiE	Transport and binding proteins	Amino acids, peptides and amines	Membrane	355
gi|116076874	SPD_1669	A0A0H2ZPJ1	Oligopeptide ABC transporter, permease protein AmiD	amiD	872	AmiD	Transport and binding proteins	Amino acids, peptides and amines	Membrane	308
gi|116077663	SPD_1670	A0A0H2ZRM1	Oligopeptide ABC transporter, permease protein AmiC	amiC	872	AmiC	Transport and binding proteins	Amino acids, peptides and amines	Membrane	498
gi|116075931	SPD_1671	A0A0H2ZLE0	Oligopeptide ABC transporter, oligopeptide-binding protein AmiA	amiA	872	AmiA	Transport and binding proteins	Amino acids, peptides and amines	Cellwall	659
gi|116077296	SPD_1672	A0A0H2ZQ42	Membrane protein, putative	SPD_1672	873	SPD_1672	Unknown function	Unknown function	Membrane	397
gi|116076223	SPD_1673	A0A0H2ZLN9	Sucrose phosphorylase	gtfA	874	GtfA	Carbohydrate metabolism	Starch and sucrose metabolism	Cytoplasmic	480
gi|116077506	SPD_1674	A0A0H2ZR62	Uncharacterized protein	SPD_1674	875	SPD_1674	Unknown function	Unknown function	Unknown	55
gi|116076795	SPD_1675	A0A0H2ZNT3	Sugar ABC transporter, permease protein	rafG	875	RafG	Transport and binding proteins	Carbohydrates, organic alcohols and acids	Membrane	277
gi|116077664	SPD_1676	A0A0H2ZQ51	Sugar ABC transporter, permease protein	rafF	875	RafF	Transport and binding proteins	Carbohydrates, organic alcohols and acids	Membrane	288
gi|116076995	SPD_1677	A0A0H2ZPT8	Sugar ABC transporter, sugar-binding protein	rafE	875	RafE	Transport and binding proteins	Carbohydrates, organic alcohols and acids	Unknown	419
gi|116075972	SPD_1678	A0A0H2ZLX3	Alpha-galactosidase AgaN	aga	875	Aga	Carbohydrate metabolism	Galactose metabolism	Cytoplasmic	720
gi|116077109	SPD_1679	A0A0H2ZQ45	Msm operon regulatory protein MsmR	msmR	876	MsmR	Transcription	Transcription factor	Cytoplasmic	286
gi|116076293	SPD_1680	A0A0H2ZLU1	Biotin--acetyl-CoA-carboxylase ligase	birA	876	BirA	Protein fate	Protein modification and repair	Cytoplasmic	311
gi|116076999	SPD_1704	A0A0H2ZPR2	23S rRNA (Uracil-5-)-methyltransferase RumA	rumA-2	882	RumA-2	Protein synthesis	tRNA and rRNA base modification	Cytoplasmic	451
gi|116076857	SPD_1705	Q04IQ7	Regulatory protein RecX	recX	883	RecX	DNA metabolism	DNA replication, recombination and repair	Cytoplasmic	258
gi|116077019	SPD_1706	Q04IQ6	UPF0374 protein SPD	SPD_1706	884	SPD_1706	Unknown function	Unknown function	Cytoplasmic	177
gi|116076546	SPD_1707	A0A0H2ZNM0	Uncharacterized protein	SPD_1707	885	SPD_1707	Unknown function	Unknown function	Cytoplasmic	68
gi|116077369	SPD_1708	A0A0H2ZPJ8	IS1167, transposase	SPD_1708	886	SPD_1708	Unknown function	Unknown function	Cytoplasmic	409
gi|116077212	SPD_1709	Q04IQ3	60 kDa chaperonin	groEL	887	GroEL	Protein fate	Protein folding and stabilization	Cytoplasmic	540
gi|116077505	SPD_1710	Q04IQ2	10 kDa chaperonin	groES	887	GroES	Protein fate	Protein folding and stabilization	Cytoplasmic	94
gi|116076390	SPD_1711	A0A0H2ZNF9	Single-stranded DNA-binding protein	ssb_2	888	Ssb_2	DNA metabolism	DNA replication, recombination and repair	Cytoplasmic	131
gi|116076938	SPD_1712	A0A0H2ZPK2	Oxidoreductase, short chain dehydrogenase/reductase family protein	SPD_1712	889	SPD_1712	Unknown function	Unknown function	Cytoplasmic	253
gi|116076187	SPD_1713	A0A0H2ZLZ0	Uncharacterized protein	pheT_2	889	PheT_2	Protein synthesis	tRNA and rRNA base modification	Cytoplasmic	208
gi|116077660	SPD_1714	A0A0H2ZQ19	Thioredoxin family protein	SPD_1714	889	SPD_1714	Unknown function	Unknown function	Cytoplasmic	105
gi|116076823	SPD_1715	A0A0H2ZMZ9	Uncharacterized protein	SPD_1715	889	SPD_1715	Unknown function	Unknown function	Unknown	99
gi|116076233	SPD_1716	A0A0H2ZM16	Uncharacterized protein	SPD_1716	890	SPD_1716	Unknown function	Unknown function	Unknown	63
gi|116077087	SPD_1717	A0A0H2ZQ22	Membrane protein, putative	SPD_1717	891	SPD_1717	Unknown function	Unknown function	Membrane	224
gi|116076569	SPD_1718	A0A0H2ZNR0	Uncharacterized protein	SPD_1718	892	SPD_1718	Transcription	Transcription factor	Cytoplasmic	148
gi|116077133	SPD_1719	A0A0H2ZQ62	PAP2 family protein	SPD_1719	892	SPD_1719	Unknown function	Unknown function	Membrane	167
gi|116076235	SPD_1720	A0A0H2ZMX0	Uncharacterized protein	SPD_1720	892	SPD_1720	Unknown function	Unknown function	Cytoplasmic	120
gi|116076597	SPD_1721	A0A0H2ZNZ4	ABC transporter, ATP-binding protein	SPD_1721	893	SPD_1721	Transport and binding proteins	Other transport and binding proteins	Membrane	343
gi|116076672	SPD_1723	A0A0H2ZNI7	Uncharacterized protein	SPD_1723	895	SPD_1723	Transcription	Transcription factor	Unknown	37
gi|116077754	SPD_1725	Q04IN9	Probable transcriptional regulatory protein SPD	SPD_1725	897	SPD_1725	Regulatory functions	DNA interactions	Cytoplasmic	238
gi|116075952	SPD_1726	Q04IN8	Pneumolysin	ply	898	Ply	Cellular processes	Pathogenesis	Extracellular	471
gi|116077167	SPD_1727	A0A0H2ZPU1	Uncharacterized protein	SPD_1727	899	SPD_1727	Unknown function	Unknown function	Membrane	136
gi|116076059	SPD_1728	A0A0H2ZMJ2	Uncharacterized protein	SPD_1728	899	SPD_1728	Unknown function	Unknown function	Unknown	202
gi|116076450	SPD_1729	A0A0H2ZND7	Uncharacterized protein	SPD_1729	900	SPD_1729	Unknown function	Unknown function	Unknown	152
gi|116077173	SPD_1731	A0A0H2ZPU4	Uncharacterized protein	SPD_1731	902	SPD_1731	Unknown function	Unknown function	Unknown	86
gi|116077177	SPD_1732	A0A0H2ZQ83	Uncharacterized protein	SPD_1732	903	SPD_1732	Unknown function	Unknown function	Unknown	183
gi|116077540	SPD_1733	A0A0H2ZPR3	Uncharacterized protein	SPD_1733	904	SPD_1733	Unknown function	Unknown function	Cytoplasmic	65
gi|116077584	SPD_1734	A0A0H2ZRA4	Uncharacterized protein	SPD_1734	904	SPD_1734	Unknown function	Unknown function	Membrane	264
gi|116076774	SPD_1735	A0A0H2ZN78	Uncharacterized protein	SPD_1735	905	SPD_1735	Unknown function	Unknown function	Cytoplasmic	141
gi|116076743	SPD_1736	A0A0H2ZP30	Uncharacterized protein	SPD_1736	906	SPD_1736	Unknown function	Unknown function	Cytoplasmic	119
gi|116077353	SPD_1737	A0A0H2ZPA7	Autolysin/N-acetylmuramoyl-L-alanine amidase	lytA	907	LytA	Glycan biosynthesis and metabolism	Glycan degradation	Extracellular	318
gi|116077588	SPD_1738	A0A0H2ZPV0	MATE efflux family protein DinF	dinF	908	DinF	Transport and binding proteins	Other transport and binding proteins	Membrane	456
gi|116076851	SPD_1739	Q04IM6	Protein RecA	recA	909	RecA	DNA metabolism	DNA replication, recombination and repair	Cytoplasmic	388
gi|116076359	SPD_1740	Q04IM5	Putative competence-damage inducible protein	cinA	909	CinA	Metabolism of cofactors and vitamins	Nicotinate and nicotinamide metabolism	Cytoplasmic	418
gi|116076952	SPD_1741	A0A0H2ZNL9	Transcriptional regulator, putative	SPD_1741	909	SPD_1741	Transcription	Transcription factor	Membrane	338
gi|116077335	SPD_1742	A0A0H2ZP88	Acetyltransferase, GNAT family protein	SPD_1742	909	SPD_1742	Protein fate	Protein modification and repair	Membrane	172
gi|116076489	SPD_1743	A0A0H2ZNN7	tRNA threonylcarbamoyladenosine biosynthesis protein TsaE, hypothetical	tsaE	909	TsaE	Protein synthesis	tRNA and rRNA base modification	Cytoplasmic	147
gi|116076810	SPD_1744	A0A0H2ZPE5	Lipoprotein, putative	SPD_1744	910	SPD_1744	Competence	Unknown function	Membrane	206
gi|116077780	SPD_1745	A0A0H2ZRZ9	Transcriptional regulator PlcR, putative	SPD_1745	911	SPD_1745	Transcription	Transcription factor	Cytoplasmic	287
gi|116076726	SPD_1746	A0A0H2ZP15	Uncharacterized protein	SPD_1746	912	SPD_1746	Unknown function	Unknown function	Unknown	56
gi|116076883	SPD_1747	A0A0H2ZP00	Uncharacterized protein	SPD_1747	913	SPD_1747	Cellular processes	Toxin production and resistance	Membrane	74
gi|116076139	SPD_1748	A0A0H2ZM88	Uncharacterized protein	SPD_1748	913	SPD_1748	Cellular processes	Toxin production and resistance	Extracellular	62
gi|116077216	SPD_1749	A0A0H2ZQD2	Bacteriocin formation protein, putative	SPD_1749	914	SPD_1749	Cellular processes	Toxin production and resistance	Cytoplasmic	996
gi|116077428	SPD_1750	A0A0H2ZPP3	Multimeric flavodoxin WrbA (General function prediction only)	wrbA	915	WrbA	Energy metabolism	Electron transport	Cytoplasmic	234
gi|116076601	SPD_1751	A0A0H2ZNT0	Membrane protein, putative	SPD_1751	915	SPD_1751	Unknown function	Unknown function	Membrane	309
gi|116077382	SPD_1752	A0A0H2ZPD4	Lantibiotic transporter protein SlgT	slgT	915	SlgT	Transport and binding proteins	Other transport and binding proteins	Membrane	702
gi|116076537	SPD_1753	A0A0H2ZMB3	Serine protease, subtilase family protein	SPD_1753	915	SPD_1753	Protein fate	Degradation of proteins, peptides and glycopeptides	Cellwall	579
gi|116077597	SPD_1754	A0A0H2ZQ16	Uncharacterized protein	SPD_1754	915	SPD_1754	Unknown function	Unknown function	Membrane	255
gi|116076787	SPD_1755	A0A0H2ZP59	ABC transporter, ATP-binding protein	SPD_1755	915	SPD_1755	Transport and binding proteins	Unknown substrate	Membrane	210
gi|116077208	SPD_1756	A0A0H2ZQC8	Uncharacterized protein	cinA2	916	CinA2	Unknown function	Unknown function	Unknown	53
gi|116077518	SPD_1757	Q04IK8	Nucleoside diphosphate kinase	ndk	917	Ndk	Nucleotide metabolism	Pyrimidine metabolism	Cytoplasmic	137
gi|116076300	SPD_1758	Q04IK7	DNA-directed RNA polymerase subunit beta'	rpoC	917	RpoC	Transcription	RNA polymerase	Cytoplasmic	1225
gi|116077011	SPD_1759	Q04IK6	DNA-directed RNA polymerase subunit beta	rpoB	917	RpoB	Transcription	RNA polymerase	Cytoplasmic	1203
gi|116076113	SPD_1761	A0A0H2ZLT8	CBS domain membrane protein	SPD_1761	919	SPD_1761	Unknown function	Unknown function	Membrane	443
gi|116077007	SPD_1762	A0A0H2ZNQ9	DNA-entry nuclease	SPD_1762	920	SPD_1762	Unknown function	Unknown function	Membrane	274
gi|116076854	SPD_1763	A0A0H2ZNX6	Uncharacterized protein	SPD_1763	921	SPD_1763	Transcription	RNA polymerase	Membrane	68
gi|116077419	SPD_1764	A0A0H2ZQS7	UDP-N-acetylglucosamine 1-carboxyvinyltransferase	murA-2	921	MurA-2	Glycan biosynthesis and metabolism	Peptidoglycan biosynthesis	Cytoplasmic	427
gi|116076586	SPD_1765	A0A0H2ZNY4	Uncharacterized protein	ylbL	922	YlbL	Unknown function	Unknown function	Unknown	345
gi|116076219	SPD_1766	Q04IK0	Phosphopantetheine adenylyltransferase	coaD	922	CoaD	Metabolism of cofactors and vitamins	Pantothenate and CoA biosynthesis	Cytoplasmic	162
gi|116077281	SPD_1767	A0A0H2ZQ24	Type II DNA modification methyltransferase, putative	SPD_1767	922	SPD_1767	Protein synthesis	tRNA and rRNA base modification	Cytoplasmic	179
gi|116076360	SPD_1768	Q04IJ8	Aspartate--ammonia ligase	asnA	923	AsnA	Amino acid metabolism	Alanine, aspartate and glutamate metabolism	Cytoplasmic	330
gi|116077441	SPD_1769	A0A0H2ZPQ3	Membrane protein, putative	SPD_1769	925	SPD_1769	Unknown function	Unknown function	Membrane	235
gi|116076507	SPD_1770	A0A0H2ZMJ9	Uncharacterized protein	SPD_1770	924	SPD_1770	Unknown function	Unknown function	Unknown	52
gi|116077485	SPD_1771	A0A0H2ZPS9	SpoU rRNA Methylase family protein	SPD_1771	925	SPD_1771	Unknown function	Unknown function	Cytoplasmic	246
gi|116076806	SPD_1772	A0A0H2ZMY3	Acylphosphatase, putative	acyP	926	AcyP	Carbohydrate metabolism	Pyruvate metabolism	Unknown	87
gi|116077638	SPD_1773	A0A0H2ZRG2	Membrane protein insertase YidC	yidC	927	YidC	Protein fate	Protein and peptide secretion and trafficking	Membrane	308
gi|116076832	SPD_1774	A0A0H2ZPG2	Pyruvate formate-lyase activating enzyme	pflA	928	PflA	Protein fate	Protein modification and repair	Cytoplasmic	264
gi|116076879	SPD_1775	A0A0H2ZPJ5	Diaminopimelate decarboxylase	lysA	929	LysA	Amino acid metabolism	Lysine biosynthesis	Cytoplasmic	416
gi|116076057	SPD_1776	A0A0H2ZLC6	Pur operon repressor PurR	purR	929	PurR	Regulatory functions	DNA interactions	Cytoplasmic	275
gi|116077170	SPD_1777	A0A0H2ZNW3	Cmp-binding-factor 1	cbf1	930	Cbf1	Unknown function	Unknown function	Cytoplasmic	317
gi|116077384	SPD_1778	A0A0H2ZQA2	Uncharacterized protein	SPD_1778	930	SPD_1778	DNA metabolism	DNA replication, recombination and repair	Cytoplasmic	418
gi|116077165	SPD_1779	A0A0H2ZNV8	Thiamine pyrophosphokinase	thiN	930	ThiN	Metabolism of cofactors and vitamins	Thiamine metabolism	Membrane	220
gi|116076116	SPD_1780	A0A0H2ZM74	Ribulose-phosphate 3-epimerase	rpe	930	Rpe	Carbohydrate metabolism	Pentose phosphate pathway	Cytoplasmic	218
gi|116077078	SPD_1781	A0A0H2ZNW0	Putative ribosome biogenesis GTPase RsgA	rsgA	930	RsgA	Protein synthesis	Translation factors	Cytoplasmic	292
gi|116076343	SPD_1782	Q04II4	Ribosomal RNA small subunit methyltransferase A	ksgA	930	KsgA	Protein synthesis	tRNA and rRNA base modification	Cytoplasmic	290
gi|116077774	SPD_1783	A0A0H2ZRI1	Uncharacterized protein	SPD_1783	931	SPD_1783	Unknown function	Unknown function	Cytoplasmic	102
gi|116076092	SPD_1784	A0A0H2ZLF1	ABC transporter, ATP-binding protein	SPD_1784	931	SPD_1784	Transport and binding proteins	Unknown substrate	Membrane	213
gi|116077343	SPD_1785	A0A0H2ZQK1	Immunity protein, putative	SPD_1785	931	SPD_1785	Cellular processes	Toxin production and resistance	Membrane	676
gi|116076764	SPD_1786	A0A0H2ZNR1	Transcriptional regulator PlcR, putative	SPD_1786	932	SPD_1786	Transcription	Transcription factor	Cytoplasmic	299
gi|116076313	SPD_1787	A0A0H2ZM69	Ribonuclease M5	SPD_1787	933	SPD_1787	Transcription	RNA processing	Cytoplasmic	186
gi|116077181	SPD_1788	A0A0H2ZNX3	Hydrolase, TatD family protein	SPD_1788	933	SPD_1788	Unknown function	Enzymes of unknown specificity	Cytoplasmic	257
gi|116076867	SPD_1789	A0A0H2ZNY6	Cell wall surface anchor family protein	SPD_1789	934	SPD_1789	Glycan biosynthesis and metabolism	Glycan biosynthesis and metabolism - Other	Cellwall	221
gi|116077655	SPD_1790	Q04IH6	50S ribosomal protein L34	rpmH	935	RpmH	Protein synthesis	Ribosomal proteins	Cytoplasmic	44
gi|116076779	SPD_1791	A0A0H2ZPC0	Aminotransferase, class I	alaA	936	AlAA	Amino acid metabolism	Alanine, aspartate and glutamate metabolism	Cytoplasmic	404
gi|116076896	SPD_1792	A0A0H2ZPL0	Uncharacterized protein	SPD_1792	937	SPD_1792	Unknown function	Unknown function	Membrane	97
gi|116075992	SPD_1793	A0A0H2ZLK6	Universal stress protein	SPD_1793	938	SPD_1793	Unknown function	Unknown function	Cytoplasmic	150
gi|116077124	SPD_1794	A0A0H2ZP04	Cof family protein	SPD_1794	939	SPD_1794	Unknown function	Enzymes of unknown specificity	Cytoplasmic	462
gi|116076251	SPD_1795	A0A0H2ZLR5	Uncharacterized protein	SPD_1795	940	SPD_1795	Unknown function	Unknown function	Unknown	42
gi|116076384	SPD_1796	A0A0H2ZNF4	L-asparaginase, putative	ansA	941	AnsA	Amino acid metabolism	Alanine, aspartate and glutamate metabolism	Cytoplasmic	320
gi|116077685	SPD_1797	A0A0H2ZQ65	Catabolite control protein A	ccpA	942	CcpA	Regulatory functions	DNA interactions	Cytoplasmic	336
gi|116076710	SPD_1798	A0A0H2ZNM2	DNA-binding response regulator	SPD_1798	943	SPD_1798	DNA metabolism	DNA modification	Cytoplasmic	199
gi|116076008	SPD_1799	A0A0H2ZLL8	Sensor histidine kinase, putative	desK	943	DesK	Signal transduction	Two-component system	Membrane	365
gi|116076978	SPD_1800	A0A0H2ZPP1	Membrane protein, putative	SPD_1800	943	SPD_1800	Cellular processes	Toxin production and resistance	Membrane	245
gi|116076762	SPD_1801	A0A0H2ZMU8	ABC transporter, ATP-binding protein	SPD_1801	943	SPD_1801	Transport and binding proteins	Other transport and binding proteins	Membrane	294
gi|116076734	SPD_1802	A0A0H2ZP90	Uncharacterized protein	SPD_1802	943	SPD_1802	Unknown function	Unknown function	Membrane	64
gi|116075933	SPD_1803	A0A0H2ZL07	Uncharacterized protein	SPD_1803	943	SPD_1803	Unknown function	Unknown function	Membrane	59
gi|116075912	SPD_1818	A0A0H2ZLC3	Transcriptional regulator ComX1	comX1	949	ComX1	Signal transduction	Two-component system	Cytoplasmic	159
gi|116076272	SPD_1819	A0A0H2ZN77	Transcription termination/antitermination protein NusG	nusG	950	NusG	Transcription	Transcription factor	Cytoplasmic	178
gi|116077440	SPD_1820	A0A0H2ZQZ7	Preprotein translocase, SecE subunit	secE	950	SecE	Protein fate	Protein and peptide secretion and trafficking	Membrane	58
gi|116076575	SPD_1821	A0A0H2ZMF9	Penicillin-binding protein 2A	pbp2A	951	Pbp2A	Glycan biosynthesis and metabolism	Peptidoglycan biosynthesis	Membrane	731
gi|116076303	SPD_1822	A0A0H2ZM65	Pseudouridine synthase	rluD	952	RluD	Protein synthesis	Pyrimidine metabolism	Cytoplasmic	291
gi|116077018	SPD_1823	A0A0H2ZNS0	Glyceraldehyde-3-phosphate dehydrogenase	gap	953	Gap	Carbohydrate metabolism	Glycolysis / Gluconeogenesis	Cytoplasmic	335
gi|116076191	SPD_1824	A0A0H2ZMC2	Uncharacterized protein	SPD_1824	954	SPD_1824	Unknown function	Unknown function	Membrane	320
gi|116077451	SPD_1826	A0A0H2ZQE9	Nicotinate-nucleotide pyrophosphorylase	nadC	956	NadC	Metabolism of cofactors and vitamins	Nicotinate and nicotinamide metabolism	Cytoplasmic	290
gi|116077612	SPD_1827	A0A0H2ZQX7	Membrane protein, putative	SPD_1827	957	SPD_1827	Transport and binding proteins	Other transport and binding proteins	Membrane	436
gi|116076499	SPD_1828	A0A0H2ZN22	Uncharacterized protein	SPD_1828	958	SPD_1828	Transport and binding proteins	Unknown substrate	Unknown	43
gi|116077083	SPD_1829	A0A0H2ZNW4	Transcriptional regulator, GntR family protein	SPD_1829	959	SPD_1829	Transcription	Transcription factor	Cytoplasmic	242
gi|116075949	SPD_1830	A0A0H2ZMH4	Glycosyl hydrolase, family protein 1	bglB	960	BglB	Carbohydrate metabolism	Starch and sucrose metabolism	Cytoplasmic	469
gi|116076221	SPD_1831	A0A0H2ZN34	Permease IIC component	celB	960	CelB	Transport and binding proteins	Carbohydrates, organic alcohols and acids	Membrane	431
gi|116076172	SPD_1832	A0A0H2ZMS6	PTS system, IIB component	celA	960	CelA	Transport and binding proteins	Carbohydrates, organic alcohols and acids	Cytoplasmic	102
gi|116077519	SPD_1833	A0A0H2ZR72	PTS system, IIA component	celC	960	CelC	Transport and binding proteins	Carbohydrates, organic alcohols and acids	Cytoplasmic	102
gi|116076462	SPD_1834	A0A0H2ZM56	Aldehyde-alcohol dehydrogenase	adhE	961	AdhE	Carbohydrate metabolism	Glycolysis / Gluconeogenesis	Cytoplasmic	883
gi|116077770	SPD_1835	A0A0H2ZQE8	Uncharacterized protein	SPD_1835	962	SPD_1835	Unknown function	Unknown function	Extracellular	45
gi|116077178	SPD_1836	A0A0H2ZPU8	Uncharacterized protein	SPD_1836	962	SPD_1836	Unknown function	Unknown function	Unknown	136
gi|116077718	SPD_1837	A0A0H2ZQ64	Phosphotyrosine protein phosphatase	SPD_1837	962	SPD_1837	Protein fate	Protein modification and repair	Cytoplasmic	142
gi|116076909	SPD_1838	A0A0H2ZP20	Preprotein translocase, YajC subunit	yajC	962	YajC	Protein fate	Protein and peptide secretion and trafficking	Unknown	99
gi|116076305	SPD_1839	A0A0H2ZLU9	Transketolase	tkt	962	Tkt	Carbohydrate metabolism	Pentose phosphate pathway	Cytoplasmic	658
gi|116076608	SPD_1840	A0A0H2ZNE1	Uncharacterized protein	ulaG	963	UlaG	Carbohydrate metabolism	Ascorbate and aldarate metabolism	Cytoplasmic	363
gi|116076193	SPD_1841	A0A0H2ZLZ5	Transcriptional regulator, BglG family protein	SPD_1841	963	SPD_1841	Transcription	Transcription factor	Cytoplasmic	557
gi|116076201	SPD_1842	A0A0H2ZN24	L-ribulose-5-phosphate 4-epimerase	araD	964	ArAD	Carbohydrate metabolism	Pentose and glucuronate interconversions	Cytoplasmic	234
gi|116076053	SPD_1843	A0A0H2ZMI7	Hexulose-6-phosphate isomerase, putative	sgbU	964	SgbU	Carbohydrate metabolism	Pentose and glucuronate interconversions	Cytoplasmic	287
gi|116076873	SPD_1844	A0A0H2ZNZ0	Hexulose-6-phosphate synthase, putative	ulaD	964	UlaD	Carbohydrate metabolism	Pentose and glucuronate interconversions	Cytoplasmic	221
gi|116076367	SPD_1845	A0A0H2ZMA1	PTS system, IIA component	ulaC	964	UlaC	Transport and binding proteins	Carbohydrates, organic alcohols and acids	Cytoplasmic	161
gi|116077182	SPD_1846	A0A0H2ZQ86	PTS system, IIB component	ulaB	964	UlaB	Transport and binding proteins	Carbohydrates, organic alcohols and acids	Unknown	93
gi|116077277	SPD_1847	A0A0H2ZQJ0	PTS system, membrane component, putative	ulaA	964	UlaA	Transport and binding proteins	Carbohydrates, organic alcohols and acids	Membrane	485
gi|116076419	SPD_1848	A0A0H2ZMD6	Uncharacterized protein	SPD_1848	965	SPD_1848	Unknown function	Unknown function	Cytoplasmic	207
gi|116077560	SPD_1849	A0A0H2ZPS7	Protein jag (SpoIIIJ-associated protein ), putative	SPD_1849	965	SPD_1849	Unknown function	Unknown function	Cytoplasmic	328
gi|116076705	SPD_1850	A0A0H2ZNL7	Membrane protein insertase YidC	yidC	965	YidC	Protein fate	Protein and peptide secretion and trafficking	Membrane	276
gi|116076469	SPD_1851	Q04ID0	Ribonuclease P protein component	rnpA	965	RnpA	Transcription	RNA processing	Cytoplasmic	123
gi|116077544	SPD_1852	A0A0H2ZPX9	Uncharacterized protein	SPD_1852	965	SPD_1852	Unknown function	Unknown function	Unknown	43
gi|116076433	SPD_1853	Q04IC8	Acetate kinase	ackA	965	AckA	Carbohydrate metabolism	Pyruvate metabolism	Cytoplasmic	396
gi|116077283	SPD_1854	A0A0H2ZPE2	Uncharacterized protein	SPD_1854	965	SPD_1854	Unknown function	Unknown function	Membrane	317
gi|116076224	SPD_1855	A0A0H2ZMW0	Uncharacterized protein	SPD_1855	965	SPD_1855	DNA metabolism	DNA modification	Unknown	126
gi|116077071	SPD_1856	A0A0H2ZNV6	Uncharacterized protein	SPD_1856	965	SPD_1856	DNA metabolism	DNA modification	Unknown	60
gi|116075997	SPD_1857	A0A0H2ZLL1	Uncharacterized protein	SPD_1857	966	SPD_1857	Unknown function	Unknown function	Membrane	137
gi|116076729	SPD_1858	A0A0H2ZN48	Uncharacterized protein	SPD_1858	966	SPD_1858	Unknown function	Unknown function	Membrane	153
gi|116076746	SPD_1859	A0A0H2ZN63	Uncharacterized protein	SPD_1859	966	SPD_1859	Unknown function	Unknown function	Cytoplasmic	86
gi|116077392	SPD_1860	A0A0H2ZPL6	Competence protein CglD	clgD	966	ClgD	Unknown function	Unknown function	Membrane	134
gi|116076486	SPD_1861	A0A0H2ZM76	Competence protein CglC	cglC	966	CglC	Protein fate	Protein and peptide secretion and trafficking	Unknown	108
gi|116076568	SPD_1862	A0A0H2ZMF5	Competence protein CglB	cglB	966	CglB	Unknown function	Unknown function	Membrane	290
gi|116077359	SPD_1863	A0A0H2ZPB3	Competence protein CglA	cglA	966	CglA	Protein fate	Protein and peptide secretion and trafficking	Cytoplasmic	313
gi|116076485	SPD_1864	A0A0H2ZMH8	Uncharacterized protein	SPD_1864	966	SPD_1864	Unknown function	Unknown function	Cytoplasmic	121
gi|116077673	SPD_1865	A0A0H2ZRI0	Alcohol dehydrogenase, zinc-containing	adh2	967	Adh2	Carbohydrate metabolism	Propanoate metabolism	Cytoplasmic	352
gi|116076809	SPD_1866	A0A0H2ZNU1	N-acetylglucosamine-6-phosphate deacetylase	nagA	968	NagA	Carbohydrate metabolism	Amino sugar and nucleotide sugar metabolism	Cytoplasmic	383
gi|116076929	SPD_1867	A0A0H2ZPN2	Membrane protein, putative	oatA	969	OatA	Unknown function	Unknown function	Membrane	605
gi|116076091	SPD_1868	Q04IB3	Queuine tRNA-ribosyltransferase	tgt	970	Tgt	Protein synthesis	tRNA and rRNA base modification	Cytoplasmic	380
gi|116076470	SPD_1869	A0A0H2ZM61	Membrane protein, putative	SPD_1869	971	SPD_1869	Unknown function	Unknown function	Membrane	285
gi|116077579	SPD_1871	A0A0H2ZQT9	Uncharacterized protein	SPD_1871	973	SPD_1871	Unknown function	Unknown function	Membrane	99
gi|116075920	SPD_1873	A0A0H2ZM52	Uncharacterized protein	SPD_1873	975	SPD_1873	Unknown function	Unknown function	Membrane	37
gi|116076346	SPD_1874	A0A0H2ZNC4	LysM domain protein	SPD_1874	976	SPD_1874	Unknown function	Unknown function	Unknown	380
gi|116077210	SPD_1875	A0A0H2ZNZ3	Hydrolase, haloacid dehalogenase-like family protein	SPD_1875	977	SPD_1875	Unknown function	Unknown function	Unknown	206
gi|116076493	SPD_1876	A0A0H2ZNH4	MATE efflux family protein	SPD_1876	977	SPD_1876	Transport and binding proteins	Other transport and binding proteins	Membrane	426
gi|116077339	SPD_1877	A0A0H2ZQQ0	Threonine synthase	thrC	977	ThrC	Amino acid metabolism	Glycine, serine and threonine metabolism	Cytoplasmic	494
gi|116076028	SPD_1878	A0A0H2ZLM8	Uncharacterized protein	SPD_1878	978	SPD_1878	Amino acid metabolism	Alanine, aspartate and glutamate metabolism	Cytoplasmic	425
gi|116075917	SPD_1895	A0A0H2ZMB6	Cytidine/deoxycytidylate deaminase family protein	SPD_1895	985	SPD_1895	Unknown function	Unknown function	Cytoplasmic	144
gi|116077522	SPD_1896	Q04IA3	Glutamate--tRNA ligase	gltX	985	GltX	Protein synthesis	tRNA aminoacylation	Cytoplasmic	486
gi|116077186	SPD_1897	Q04IA2	Glucose-6-phosphate isomerase	pgi	985	Pgi	Carbohydrate metabolism	Glycolysis / Gluconeogenesis	Cytoplasmic	449
gi|116077348	SPD_1898	A0A0H2ZPA1	Uncharacterized protein	SPD_1898	985	SPD_1898	Unknown function	Unknown function	Unknown	59
gi|116076943	SPD_1899	A0A0H2ZPK6	Glutamine amidotransferase, class 1	SPD_1899	985	SPD_1899	Amino acid metabolism	Alanine, aspartate and glutamate metabolism	Cytoplasmic	242
gi|116076106	SPD_1900	A0A0H2ZMU4	ABC transporter, ATP-binding/permease protein	SPD_1900	986	SPD_1900	Transport and binding proteins	Other transport and binding proteins	Membrane	588
gi|116076694	SPD_1901	A0A0H2ZNK6	Transposase, putative	SPD_1901	987	SPD_1901	Unknown function	Unknown function	Cytoplasmic	69
gi|116077757	SPD_1902	A0A0H2ZRX9	ABC transporter, ATP-binding/permease protein	SPD_1902	988	SPD_1902	Transport and binding proteins	Other transport and binding proteins	Membrane	564
gi|116076407	SPD_1903	Q04I96	DNA mismatch repair protein MutS	mutS	988	MutS	DNA metabolism	DNA replication, recombination and repair	Membrane	844
gi|116077535	SPD_1904	A0A0H2ZPQ9	Arginine repressor	argR	988	ArgR	Regulatory functions	DNA interactions	Cytoplasmic	148
gi|116077115	SPD_1905	Q04I94	Arginine--tRNA ligase	argS	989	ArgS	Protein synthesis	tRNA aminoacylation	Cytoplasmic	563
gi|116077055	SPD_1906	A0A0H2ZPV7	IS1381, transposase OrfB	SPD_1906	990	SPD_1906	Unknown function	Unknown function	Unknown	129
gi|116075967	SPD_1907	A0A0H2ZMI9	Uncharacterized protein	SPD_1907	991	SPD_1907	Unknown function	Unknown function	Cytoplasmic	158
gi|116076687	SPD_1908	A0A0H2ZNY1	Response regulator	phoB1	992	PhoB1	Signal transduction	Two-component system	Cytoplasmic	235
gi|116076526	SPD_1909	A0A0H2ZML6	Sensor histidine kinase PnpS	pnpS	992	PnpS	Signal transduction	Two-component system	Membrane	443
gi|116077366	SPD_1910	A0A0H2ZQM6	Phosphate ABC transporter, phosphate-binding protein	pstS1	992	PstS1	Transport and binding proteins	Anions	Unknown	291
gi|116076294	SPD_1911	A0A0H2ZN20	Phosphate ABC transporter, permease protein PstC	pstC1	992	PstC1	Transport and binding proteins	Anions	Membrane	287
gi|116077144	SPD_1912	A0A0H2ZPQ0	Phosphate ABC transporter, permease protein PstA	pstA1	992	PstA1	Transport and binding proteins	Anions	Membrane	271
gi|116077150	SPD_1913	A0A0H2ZQ97	Phosphate import ATP-binding protein PstB	pstB1	992	PstB1	Transport and binding proteins	Anions	Membrane	250
gi|116076120	SPD_1914	A0A0H2ZMP1	Phosphate-specific transport system accessory protein PhoU	phoU	992	PhoU1	Transport and binding proteins	Anions	Cytoplasmic	216
gi|116077626	SPD_1916	A0A0H2ZQ34	Transcriptional regulator	SPD_1916	994	SPD_1916	Transcription	Transcription factor	Cytoplasmic	146
gi|116076864	SPD_1917	A0A0H2ZNE5	Uncharacterized protein	SPD_1917	995	SPD_1917	Unknown function	Unknown function	Unknown	40
gi|116077571	SPD_1918	Q04I82	Glycerol-3-phosphate dehydrogenase [NAD(P)+]	gpsA	996	GpsA	Lipid metabolism	Glycerophospholipid metabolism	Cytoplasmic	338
gi|116076768	SPD_1919	A0A0H2ZMV4	UTP-glucose-1-phosphate uridylyltransferase	galU	996	GalU	Carbohydrate metabolism	Galactose metabolism	Cytoplasmic	299
gi|116077439	SPD_1920	A0A0H2ZQD4	Peptidase, S54 (Rhomboid) family protein	SPD_1920	997	SPD_1920	Unknown function	Unknown function	Membrane	225
gi|116076496	SPD_1921	A0A0H2ZMI8	5-formyltetrahydrofolate cyclo-ligase family protein	SPD_1921	997	SPD_1921	Metabolism of cofactors and vitamins	One carbon pool by folate	Cytoplasmic	179
gi|116076160	SPD_1922	Q04I78	N-acetyldiaminopimelate deacetylase	SPD_1922	997	SPD_1922	Protein fate	Degradation of proteins, peptides and glycopeptides	Cytoplasmic	376
gi|116077224	SPD_1923	Q04I77	2,3,4,5-tetrahydropyridine-2,6-dicarboxylate N-acetyltransferase	dapD	997	DapD	Amino acid metabolism	Lysine biosynthesis	Cytoplasmic	232
gi|116076246	SPD_1924	A0A0H2ZLQ9	Membrane protein, putative	SPD_1924	998	SPD_1924	Unknown function	Unknown function	Membrane	303
gi|116077068	SPD_1925	A0A0H2ZPW7	Penicillin-binding protein 1B	pbp1B	999	Pbp1B	Glycan biosynthesis and metabolism	Peptidoglycan biosynthesis	Membrane	821
gi|116076631	SPD_1926	Q04I74	Tyrosine--tRNA ligase	tyrS	1000	TyrS	Protein synthesis	tRNA aminoacylation	Cytoplasmic	418
gi|116077667	SPD_1927	A0A0H2ZRH7	Cation-transporting ATPase, E1-E2 family protein	SPD_1927	1001	SPD_1927	Energy metabolism	Oxidative phosphorylation	Membrane	687
gi|116076125	SPD_1928	A0A0H2ZMP5	Uncharacterized protein	SPD_1928	1002	SPD_1928	Unknown function	Unknown function	Unknown	103
gi|116077258	SPD_1929	A0A0H2ZQC5	rRNA (Guanine-N1-)-methyltransferase	rrmA	1003	RrmA	Amino acid metabolism	Cysteine and methionine metabolism	Cytoplasmic	282
gi|116077260	SPD_1930	A0A0H2ZQ05	Uncharacterized protein	SPD_1930	1004	SPD_1930	Unknown function	Unknown function	Membrane	68
gi|116076140	SPD_1931	A0A0H2ZMX5	Uncharacterized protein	SPD_1931	1005	SPD_1931	Unknown function	Unknown function	Unknown	190
gi|116076534	SPD_1932	A0A0H2ZN54	Alpha-1,4 glucan phosphorylase	malP	1006	MalP	Carbohydrate metabolism	Starch and sucrose metabolism	Membrane	752
gi|116077425	SPD_1933	A0A0H2ZQT2	4-alpha-glucanotransferase	malQ	1006	MalQ	Carbohydrate metabolism	Starch and sucrose metabolism	Cytoplasmic	505
gi|116077748	SPD_1934	A0A0H2ZQ87	Maltose/maltodextrin ABC transporter, maltose/maltodextrin-binding protein	malX	1007	MalX	Transport and binding proteins	Carbohydrates, organic alcohols and acids	Unknown	423
gi|116075965	SPD_1935	A0A0H2ZMC6	Maltodextrin ABC transporter, permease protein	malC	1007	MalC	Transport and binding proteins	Carbohydrates, organic alcohols and acids	Membrane	430
gi|116077734	SPD_1936	A0A0H2ZRM7	Maltodextrin ABC transporter, permease protein	malD	1007	MalD	Transport and binding proteins	Carbohydrates, organic alcohols and acids	Membrane	280
gi|116076585	SPD_1937	A0A0H2ZNC1	Maltodextrose utilization protein MalA	malA	1007	MalA	Unknown function	Unknown function	Membrane	266
gi|116077467	SPD_1938	A0A0H2ZQG8	Maltose operon transcriptional repressor	malR	1007	MalR	Transcription	Transcription factor	Cytoplasmic	328
gi|116076372	SPD_1939	A0A0H2ZNE4	Uncharacterized protein	SPD_1939	1008	SPD_1939	Unknown function	Unknown function	Unknown	73
gi|116077721	SPD_1940	A0A0H2ZRS0	Membrane protein, putative	SPD_1940	1009	SPD_1940	Protein synthesis	tRNA aminoacylation	Membrane	313
gi|116076713	SPD_1941	Q04I59	Aspartate--tRNA ligase	aspS	1009	AspS	Protein synthesis	tRNA aminoacylation	Cytoplasmic	587
gi|116077000	SPD_1942	A0A0H2ZPA3	Uncharacterized protein	SPD_1942	1010	SPD_1942	Unknown function	Unknown function	Unknown	63
gi|116075926	SPD_1943	A0A0H2ZL02	Uncharacterized protein	SPD_1943	1010	SPD_1943	Unknown function	Unknown function	Membrane	76
gi|116077222	SPD_1944	A0A0H2ZQD6	CAAX amino terminal protease family protein	SPD_1944	1010	SPD_1944	Protein fate	Degradation of proteins, peptides and glycopeptides	Membrane	213
gi|116076188	SPD_1945	A0A0H2ZLL9	Membrane protein, putative	SPD_1945	1010	SPD_1945	Unknown function	Unknown function	Membrane	244
gi|116077583	SPD_1946	A0A0H2ZPU6	Uncharacterized protein	SPD_1946	1010	SPD_1946	Unknown function	Unknown function	Membrane	65
gi|116076606	SPD_1947	A0A0H2ZMI0	Transcriptional regulator, putative	SPD_1947	1010	SPD_1947	Transcription	Transcription factor	Cytoplasmic	68
gi|116075889	SPD_1948	A0A0H2ZLA1	Uncharacterized protein	SPD_1948	1010	SPD_1948	Unknown function	Unknown function	Membrane	154
gi|116076949	SPD_1949	A0A0H2ZPL3	Uncharacterized protein	SPD_1949	1010	SPD_1949	Unknown function	Unknown function	Unknown	59
gi|116076363	SPD_1950	Q04I50	Histidine--tRNA ligase	hisS	1010	HisS	Protein synthesis	tRNA aminoacylation	Cytoplasmic	429
gi|116077163	SPD_1951	A0A0H2ZP66	Transporter, major facilitator family protein	SPD_1951	1011	SPD_1951	Transport and binding proteins	Other transport and binding proteins	Membrane	415
gi|116076505	SPD_1952	A0A0H2ZN27	Transcriptional activator, Rgg/GadR/MutR family protein, C-terminal domain	SPD_1952	1012	SPD_1952	Regulatory functions	DNA interactions	Membrane	283
gi|116077370	SPD_1953	A0A0H2ZPC5	Uncharacterized protein	SPD_1953	1012	SPD_1953	Unknown function	Unknown function	Unknown	44
gi|116076709	SPD_1954	A0A0H2ZP01	Uncharacterized protein	SPD_1954	1013	SPD_1954	Unknown function	Unknown function	Cytoplasmic	113
gi|116077346	SPD_1955	A0A0H2ZQQ5	Uncharacterized protein	SPD_1955	1014	SPD_1955	Unknown function	Unknown function	Unknown	39
gi|116077141	SPD_1956	Q04I44	Dihydroxy-acid dehydratase	ilvD	1015	IlvD	Amino acid metabolism	Valine, leucine and isoleucine biosynthesis	Cytoplasmic	567
gi|116075951	SPD_1957	A0A0H2ZL49	Transketolase, C-terminal subunit	tktC	1016	TktC	Carbohydrate metabolism	Pentose phosphate pathway	Cytoplasmic	310
gi|116075913	SPD_1958	A0A0H2ZKZ2	Transketolase N-terminal subunit	tktN	1016	TktN	Carbohydrate metabolism	Pentose phosphate pathway	Unknown	285
gi|116077219	SPD_1959	A0A0H2ZNZ7	PTS system, IIC component, putative	ulaA	1016	UlaA	Transport and binding proteins	Carbohydrates, organic alcohols and acids	Membrane	448
gi|116076632	SPD_1960	A0A0H2ZP18	PTS system, IIB component, putative	ulaB	1016	UlaB	Transport and binding proteins	Carbohydrates, organic alcohols and acids	Cytoplasmic	94
gi|116077005	SPD_1961	A0A0H2ZPA9	Transcriptional regulator, BglG family protein	SPD_1961	1016	SPD_1961	Transcription	Transcription factor	Cytoplasmic	676
gi|116077777	SPD_1962	A0A0H2ZQD8	Uncharacterized protein	SPD_1962	1017	SPD_1962	Unknown function	Unknown function	Membrane	335
gi|116076639	SPD_1963	Q04I37	50S ribosomal protein L32	rpmF	1018	RpmF	Protein synthesis	Ribosomal proteins	Cytoplasmic	60
gi|116077484	SPD_1964	Q04I36	50S ribosomal protein L33	rpmG	1018	RpmG	Protein synthesis	Ribosomal proteins	Cytoplasmic	49
gi|116076376	SPD_1965	A0A0H2ZN79	Choline binding protein PcpA	pcpA	1019	PcpA	Unknown function	Unknown function	Extracellular	680
gi|116076967	SPD_1966	A0A0H2ZPR5	IS1381, transposase OrfA	SPD_1966	1020	SPD_1966	DNA metabolism	DNA modification	Cytoplasmic	189
gi|116075925	SPD_1967	A0A0H2ZLD4	IS1381, transposase OrfB	SPD_1967	1020	SPD_1967	Unknown function	Unknown function	Unknown	129
gi|116076984	SPD_1968	A0A0H2ZP89	Uncharacterized protein	SPD_1968	1021	SPD_1968	Unknown function	Unknown function	Cytoplasmic	108
gi|116076454	SPD_1969	A0A0H2ZNK8	Glycosyl hydrolase-related protein	SPD_1969	1022	SPD_1969	Glycan biosynthesis and metabolism	Glycan degradation	Membrane	626
gi|116077559	SPD_1970	A0A0H2ZPZ2	ROK family protein	SPD_1970	1022	SPD_1970	Unknown function	Unknown function	Cytoplasmic	289
gi|116076744	SPD_1971	A0A0H2ZNP7	Glycosyl hydrolase-related protein	SPD_1971	1022	SPD_1971	Glycan biosynthesis and metabolism	Glycan degradation	Cytoplasmic	881
gi|116077605	SPD_1972	A0A0H2ZRC8	Uncharacterized protein	SPD_1972	1022	SPD_1972	Unknown function	Unknown function	Cytoplasmic	426
gi|116076478	SPD_1973	A0A0H2ZNM9	Alpha-1,2-mannosidase, putative	SPD_1973	1023	SPD_1973	Metabolism of terpenoids and polyketides	Polyketide sugar unit biosynthesis	Unknown	694
gi|116077532	SPD_1974	A0A0H2ZR86	Uncharacterized protein	SPD_1974	1024	SPD_1974	Glycan biosynthesis and metabolism	Glycan degradation	Cytoplasmic	559
gi|116076749	SPD_1976	Q04I25	Ornithine carbamoyltransferase	argF	1026	ArgF	Amino acid metabolism	Arginine and proline metabolism	Cytoplasmic	338
gi|116077776	SPD_1977	A0A0H2ZQF0	Carbamate kinase	arcC	1026	ArcC	Amino acid metabolism	Arginine and proline metabolism	Cytoplasmic	315
gi|116076676	SPD_1978	A0A0H2ZNX2	Membrane protein, putative	SPD_1978	1026	SPD_1978	Amino acid metabolism	Arginine and proline metabolism	Membrane	503
gi|116077017	SPD_1979	A0A0H2ZPW0	Peptidase, M20/M25/M40 family protein	SPD_1979	1026	SPD_1979	Unknown function	Unknown function	Cytoplasmic	443
gi|116077117	SPD_1981	A0A0H2ZNZ8	Uncharacterized protein	iga_2	1028	Iga_2	Unknown function	Unknown function	Unknown	96
gi|116077477	SPD_1982	A0A0H2ZR32	Uncharacterized protein	SPD_1982	1028	SPD_1982	Unknown function	Unknown function	Extracellular	49
gi|116076400	SPD_1983	A0A0H2ZMT0	Uncharacterized protein	SPD_1983	1029	SPD_1983	Unknown function	Unknown function	Unknown	59
gi|116077253	SPD_1984	A0A0H2ZQC2	Hypersensitive-induced reaction protein 4	SPD_1984	1030	SPD_1984	Unknown function	Unknown function	Membrane	299
gi|116076137	SPD_1985	A0A0H2ZLH7	Alcohol dehydrogenase, iron-containing	SPD_1985	1031	SPD_1985	Unknown function	Unknown function	Cytoplasmic	383
gi|116077032	SPD_1986	Q04I16	L-fucose isomerase	fucI	1031	FucI	Carbohydrate metabolism	Fructose and mannose metabolism	Cytoplasmic	588
gi|116076112	SPD_1987	A0A0H2ZMV0	Fucolectin-related protein	SPD_1987	1031	SPD_1987	Unknown function	Unknown function	Unknown	1038
gi|116077788	SPD_1988	A0A0H2ZQF7	Uncharacterized protein	SPD_1988	1032	SPD_1988	Unknown function	Unknown function	Unknown	764
gi|116076722	SPD_1989	A0A0H2ZNN2	PTS system, IID component	manZ	1033	ManZ	Transport and binding proteins	Carbohydrates, organic alcohols and acids	Membrane	266
gi|116077547	SPD_1990	A0A0H2ZQQ8	PTS system, IIC component	manY	1033	ManY	Transport and binding proteins	Carbohydrates, organic alcohols and acids	Membrane	257
gi|116076535	SPD_1991	A0A0H2ZNS8	PTS system, IIB component	SPD_1991	1033	SPD_1991	Transport and binding proteins	Carbohydrates, organic alcohols and acids	Cytoplasmic	156
gi|116077759	SPD_1992	A0A0H2ZQD9	PTS system, IIA component	SPD_1992	1033	SPD_1992	Transport and binding proteins	Carbohydrates, organic alcohols and acids	Cytoplasmic	147
gi|116076704	SPD_1993	A0A0H2ZNZ5	RbsD/FucU transport protein family protein	fucU	1033	FucU	Carbohydrate metabolism	Carbohydrate metabolism - Other	Cytoplasmic	146
gi|116077345	SPD_1994	A0A0H2ZQ74	L-fuculose phosphate aldolase	fucA	1033	FucA	Carbohydrate metabolism	Fructose and mannose metabolism	Cytoplasmic	212
gi|116077227	SPD_1995	A0A0H2ZP02	L-fuculose kinase FucK, putative	fucK	1033	FucK	Carbohydrate metabolism	Fructose and mannose metabolism	Cytoplasmic	467
gi|116077710	SPD_1996	A0A0H2ZQ81	Fucose operon repressor, putative	SPD_1996	1034	SPD_1996	Transcription	RNA polymerase	Cytoplasmic	257
gi|116076636	SPD_1997	A0A0H2ZNU5	Zinc ABC transporter, zinc-binding lipoprotein	adcA	1035	AdcA	Transport and binding proteins	Cations and iron carrying compounds	Membrane	501
gi|116076945	SPD_1998	A0A0H2ZPP7	Zinc ABC transporter, permease protein	adcB	1035	AdcB	Transport and binding proteins	Cations and iron carrying compounds	Membrane	268
gi|116076818	SPD_1999	A0A0H2ZMZ3	Zinc ABC transporter, ATP-binding protein	adcC	1035	AdcC	Transport and binding proteins	Cations and iron carrying compounds	Membrane	234
gi|116077211	SPD_2000	Q04I02	Transcriptional regulator AdcR	adcR	1035	AdcR	Transcription	Transcription factor	Unknown	146
gi|116076145	SPD_2001	A0A0H2ZM92	Uncharacterized protein	SPD_2001	1036	SPD_2001	Unknown function	Unknown function	Unknown	45
gi|116076517	SPD_2002	A0A0H2ZNR2	Undecaprenol-phosphate-poly(Glycerophosphate subunit) D-alanine transfer protein	dltD	1037	DltD	Signal transduction	Two-component system	Membrane	422
gi|116077385	SPD_2003	Q04HZ9	D-alanine--poly(phosphoribitol) ligase subunit 2	dltC	1037	DltC	Glycan biosynthesis and metabolism	Peptidoglycan biosynthesis	Cytoplasmic	79
gi|116076013	SPD_2004	A0A0H2ZMM5	Protein DltB	dltB	1037	DltB	Glycan biosynthesis and metabolism	Peptidoglycan biosynthesis	Membrane	414
gi|116077047	SPD_2005	Q04HZ7	D-alanine--poly(phosphoribitol) ligase subunit 1	dltA	1037	DltA	Glycan biosynthesis and metabolism	Peptidoglycan biosynthesis	Cytoplasmic	516
gi|116076630	SPD_2006	A0A0H2ZNF5	Uncharacterized protein	SPD_2006	1037	SPD_2006	Cellular processes	Pathogenesis	Membrane	43
gi|116077736	SPD_2007	A0A0H2ZRT0	Transporter, major facilitator family protein	SPD_2007	1038	SPD_2007	Transport and binding proteins	Other transport and binding proteins	Membrane	392
gi|116077064	SPD_2009	A0A0H2ZPZ9	Uncharacterized protein	SPD_2009	1040	SPD_2009	Unknown function	Unknown function	Unknown	195
gi|116076273	SPD_2010	A0A0H2ZM45	Uncharacterized protein	SPD_2010	1041	SPD_2010	Unknown function	Unknown function	Cytoplasmic	48
gi|116076884	SPD_2011	A0A0H2ZPJ9	Glycerol uptake facilitator protein	glpF	1042	GlpF	Transport and binding proteins	Unknown substrate	Membrane	234
gi|116076815	SPD_2012	A0A0H2ZNU4	Alpha-glycerophosphate oxidase	glpO	1042	GlpO	Lipid metabolism	Glycerophospholipid metabolism	Membrane	608
gi|116076788	SPD_2013	Q04HZ0	Glycerol kinase	glpK	1042	GlpK	Lipid metabolism	Glycerolipid metabolism	Cytoplasmic	502
gi|116077290	SPD_2014	A0A0H2ZQF2	Uncharacterized protein	SPD_2014	1043	SPD_2014	Unknown function	Unknown function	Cytoplasmic	475
gi|116076545	SPD_2015	Q04HY8	33 kDa chaperonin	hslO	1044	HslO	Protein fate	Protein folding and stabilization	Cytoplasmic	290
gi|116077038	SPD_2016	A0A0H2ZPX5	tRNA-dihydrouridine synthase	SPD_2016	1044	SPD_2016	Protein synthesis	tRNA and rRNA base modification	Cytoplasmic	318
gi|116075935	SPD_2017	A0A0H2ZLS0	Choline binding protein A	cbpA	1045	CbpA	Cellular processes	Pathogenesis	Unknown	701
gi|116077194	SPD_2018	A0A0H2ZNY3	Isoprenylcysteine carboxyl methyltransferase (ICMT) family protein	SPD_2018	1045	SPD_2018	Unknown function	Unknown function	Membrane	175
gi|116076297	SPD_2019	A0A0H2ZM62	Sensor histidine kinase	SPD_2019	1046	SPD_2019	Signal transduction	Two-component system	Cytoplasmic	443
gi|116076875	SPD_2020	A0A0H2ZNF6	DNA-binding response regulator	SPD_2020	1046	SPD_2020	Transcription	Transcription factor	Cytoplasmic	217
gi|116076027	SPD_2021	A0A0H2ZMN2	Uncharacterized protein	SPD_2021	1047	SPD_2021	Unknown function	Unknown function	Unknown	44
gi|116076645	SPD_2022	A0A0H2ZP24	ATP-dependent Clp protease, ATP-binding subunit	SPD_2022	1048	SPD_2022	Protein fate	Degradation of proteins, peptides and glycopeptides	Cytoplasmic	810
gi|116077012	SPD_2023	A0A0H2ZPV6	Transcriptional regulator CtsR	ctsR	1048	CtsR	Transcription	Transcription factor	Cytoplasmic	152
gi|116077578	SPD_2024	A0A0H2ZR97	ABC transporter, ATP-binding protein	SPD_2024	1049	SPD_2024	Transport and binding proteins	Other transport and binding proteins	Membrane	242
gi|116076765	SPD_2025	A0A0H2ZPB2	ABC transporter, substrate-binding protein, putative	SPD_2025	1049	SPD_2025	Transport and binding proteins	Other transport and binding proteins	Unknown	335
gi|116076492	SPD_2026	A0A0H2ZM80	ABC transporter, permease protein	SPD_2026	1049	SPD_2026	Transport and binding proteins	Other transport and binding proteins	Membrane	238
gi|116077447	SPD_2027	A0A0H2ZR04	Uncharacterized protein	SPD_2027	1049	SPD_2027	Unknown function	Unknown function	Unknown	96
gi|116077240	SPD_2028	A0A0H2ZP12	Choline binding protein D	cbpD	1050	CbpD	Unknown function	Unknown function	Unknown	448
gi|116076156	SPD_2029	A0A0H2ZMR4	Uncharacterized protein	SPD_2029	1051	SPD_2029	Protein fate	Degradation of proteins, peptides and glycopeptides	Cytoplasmic	88
gi|116077008	SPD_2030	A0A0H2ZNF7	Replicative DNA helicase	dnaB	1051	DnaB	DNA metabolism	DNA replication, recombination and repair	Membrane	450
gi|116075911	SPD_2031	Q04HX2	50S ribosomal protein L9	rplI	1051	RplI	Protein synthesis	Ribosomal proteins	Cytoplasmic	150
gi|116077487	SPD_2032	A0A0H2ZQZ4	DHH subfamily 1 protein	pde1	1051	Pde1	Signal transduction	Signal transduction - Other	Membrane	657
gi|116077494	SPD_2033	A0A0H2ZQJ5	Ribosomal subunit interface protein	yfiA	1052	YfiA	Protein synthesis	Translation factors	Cytoplasmic	182
gi|116076445	SPD_2034	A0A0H2ZMW9	Competence protein ComF, putative	comFC	1052	ComFC	Protein fate	Protein and peptide secretion and trafficking	Cytoplasmic	220
gi|116077313	SPD_2035	A0A0H2ZP72	Helicase, putative	comFA	1052	ComFA	Protein fate	Protein and peptide secretion and trafficking	Cytoplasmic	432
gi|116076015	SPD_2036	A0A0H2ZL95	Uncharacterized protein	SPD_2036	1053	SPD_2036	Unknown function	Unknown function	Cytoplasmic	211
gi|116076965	SPD_2037	A0A0H2ZPN1	Cysteine synthase	cysK	1054	CysK	Amino acid metabolism	Cysteine and methionine metabolism	Cytoplasmic	306
gi|116076208	SPD_2038	A0A0H2ZN29	Uncharacterized protein	SPD_2038	1055	SPD_2038	Carbohydrate metabolism	Amino sugar and nucleotide sugar metabolism	Cytoplasmic	89
gi|116076652	SPD_2041	Q04HW4	Elongation factor Ts	tsf	1058	Tsf	Protein synthesis	Translation factors	Cytoplasmic	346
gi|116077704	SPD_2042	Q04HW3	30S ribosomal protein S2	rpsB	1058	RpsB	Protein synthesis	Ribosomal proteins	Cytoplasmic	259
gi|116077166	SPD_2043	A0A0H2ZQ76	Secreted 45 kDa protein	SPD_2043	1059	SPD_2043	Unknown function	Unknown function	Extracellular	392
gi|116076069	SPD_2044	A0A0H2ZMK0	Rod shpae-determining protein MreD, putative	SPD_2044	1060	SPD_2044	Glycan biosynthesis and metabolism	Peptidoglycan biosynthesis	Membrane	164
gi|116076950	SPD_2045	A0A0H2ZP55	Cell shape-determining protein MreC	mreC	1060	MreC	Glycan biosynthesis and metabolism	Peptidoglycan biosynthesis	Unknown	272
gi|116076838	SPD_2046	A0A0H2ZPG6	Energy-coupling factor transporter transmembrane protein EcfT	ecfT	1060	EcfT_4	Transport and binding proteins	Cations and iron carrying compounds	Membrane	264
gi|116077658	SPD_2047	Q04HV8	Energy-coupling factor transporter ATP-binding protein EcfA2	cbiO1	1060	CbiO1	Transport and binding proteins	Cations and iron carrying compounds	Membrane	279
gi|116076563	SPD_2048	Q04HV7	Energy-coupling factor transporter ATP-binding protein EcfA1	cbiO2	1060	CbiO2	Transport and binding proteins	Cations and iron carrying compounds	Membrane	275
gi|116077452	SPD_2049	A0A0H2ZR10	CDP-diacylglycerol--glycerol-3-phosphate 3-phosphatidyltransferase	pgsA	1060	PgsA	Lipid metabolism	Glycerophospholipid metabolism	Membrane	181
gi|116076324	SPD_2050	A0A0H2ZLW2	Uncharacterized protein	SPD_2050	1060	SPD_2050	Unknown function	Unknown function	Membrane	273
gi|116077200	SPD_2051	A0A0H2ZP91	Peptidase, M16 family protein	SPD_2051	1060	SPD_2051	Protein fate	Degradation of proteins, peptides and glycopeptides	Cytoplasmic	427
gi|116076024	SPD_2052	A0A0H2ZLA0	Uncharacterized protein	SPD_2052	1060	SPD_2052	Unknown function	Unknown function	Cytoplasmic	416
gi|116075954	SPD_2053	A0A0H2ZLW0	Uncharacterized protein	SPD_2053	1061	SPD_2053	DNA metabolism	DNA replication, recombination and repair	Cytoplasmic	122
gi|116077116	SPD_2054	Q04HV1	DNA replication and repair protein RecF	recF	1061	RecF	DNA metabolism	DNA replication, recombination and repair	Cytoplasmic	365
gi|116076541	SPD_2055	A0A0H2ZNT2	Inosine-5'-monophosphate dehydrogenase	guaB	1062	GuaB	Nucleotide metabolism	Purine metabolism	Cytoplasmic	492
gi|116077386	SPD_2056	A0A0H2ZQU2	Tryptophan--tRNA ligase	trpS	1062	TrpS	Protein synthesis	tRNA aminoacylation	Cytoplasmic	341
gi|116076434	SPD_2057	A0A0H2ZME2	ABC transporter, ATP-binding protein	SPD_2057	1063	SPD_2057	Transport and binding proteins	Other transport and binding proteins	Cytoplasmic	540
gi|116077389	SPD_2058	A0A0H2ZQQ2	ABC transporter, permease protein, putative	SPD_2058	1063	SPD_2058	Transport and binding proteins	Other transport and binding proteins	Membrane	850
gi|116077168	SPD_2060	A0A0H2ZQA8	Transcriptional regulator, TetR family protein	SPD_2060	1065	SPD_2060	Transcription	Transcription factor	Cytoplasmic	180
gi|116076073	SPD_2063	A0A0H2ZLR3	Response regulator	comE	1066	ComE	Signal transduction	Two-component system	Cytoplasmic	250
gi|116076081	SPD_2064	A0A0H2ZM50	Putative sensor histidine kinase ComD	comD	1066	ComD	Signal transduction	Two-component system	Membrane	441
gi|116077643	SPD_2065	A0A0H2ZQ41	Competence-stimulating peptide type 1	comC1	1066	ComC1	Signal transduction	Two-component system	Extracellular	41
gi|116076136	SPD_2067	Q04HU2	Ribosomal RNA large subunit methyltransferase H	SPD_2067	1067	SPD_2067	Protein synthesis	tRNA and rRNA base modification	Cytoplasmic	159
gi|116077274	SPD_2068	A0A0H2ZQD7	Serine protease	degP	1068	DegP	Signal transduction	Two-component system	Unknown	393
gi|116076323	SPD_2069	A0A0H2ZM78	SpoJ protein	spoJ	1068	SpoJ	Transcription	Transcription factor	Cytoplasmic	252
gi|2911484	SPD_2300	O52776	Protein rep	rep	pDP1	Rep	DNA metabolism	DNA replication, recombination and repair	Plasmid pDP1	320
gi|125991231	SPD_2301	P0C2G8	Uncharacterized membrane protein	SPD_2301	pDP1	SPD_2301	Unknown function	Unknown function	Plasmid pDP1	41
gi|2909865	SPD_2302	O54552	Uncharacterized protein	orf2	pDP1	Orf2	Unknown function	Unknown function	Plasmid pDP1	109
gi|2909866	SPD_2303	O54519	Uncharacterized protein	orf3	pDP1	Orf3	Unknown function	Unknown function	Plasmid pDP1	158
gi|125991235	SPD_2304	P0C2H1	Uncharacterized protein	SPD_2304	pDP1	SPD_2304	Unknown function	Unknown function	Plasmid pDP1	65
gi|8163644		Q9KK48	Surface protein PspC	pspC		PsPC	Glycan biosynthesis and metabolism	Glycan biosynthesis and metabolism - Other	Cellwall	701
